# Supplementary material
Source: PubMed Central journal article supplement (PMC2730358)
Supplement: NIHMS111059-supplement-1_si_001.pdf [file NIHMS111059-supplement-1_si_001.pdf]

# Theoretical Bond Dissociation Energies of Halo-Heterocycles: Trends and Relationships to Regioselectivity in Palladium-Catalyzed Cross-Coupling Reactions.

*Yeimy Garcia, Franziska Schoenebeck, Claude Y. Legault, Craig A. Merlic\*, and K. N. Houk\**

*Contribution from the Department of Chemistry and Biochemistry, University of California, Los Angeles, California 90095. E-mail : houk@chem.ucla.edu*

## Full reference 11

Gaussian 03, Revision C.02, Frisch, M. J.; Trucks, G. W.; Schlegel, H. B.; Scuseria, G. E.; Robb, M. A.; Cheeseman, J. R.; Montgomery, Jr., J. A.; Vreven, T.; Kudin, K. N.; Burant, J. C.; Millam, J. M.; Iyengar, S. S.; Tomasi, J.; Barone, V.; Mennucci, B.; Cossi, M.; Scalmani, G.; Rega, N.; Petersson, G. A.; Nakatsuji, H.; Hada, M.; Ehara, M.; Toyota, K.; Fukuda, R.; Hasegawa, J.; Ishida, M.; Nakajima, T.; Honda, Y.; Kitao, O.; Nakai, H.; Klene, M.; Li, X.; Knox, J. E.; Hratchian, H. P.; Cross, J. B.; Adamo, C.; Jaramillo, J.; Gomperts, R.; Stratmann, R. E.; Yazyev, O.; Austin, A. J.; Cammi, R.; Pomelli, C.; Ochterski, J. W.; Ayala, P. Y.; Morokuma, K.; Voth, G. A.; Salvador, P.; Dannenberg, J. J.; Zakrzewski, V. G.; Dapprich, S.; Daniels, A. D.; Strain, M. C.; Farkas, O.; Malick, D. K.; Rabuck, A. D.; Raghavachari, K.; Foresman, J. B.; Ortiz, J. V.; Cui, Q.; Baboul, A. G.; Clifford, S.; Cioslowski, J.; Stefanov, B. B.; Liu, G.; Liashenko, A.; Piskorz, P.; Komaromi, I.; Martin, R. L.; Fox, D. J.; Keith, T.; Al-Laham, M. A.; Peng, C. Y.; Nanayakkara, A.; Challacombe, M.; Gill, P. M. W.; Johnson, B.; Chen, W.; Wong, M. W.; Gonzalez, C.; and Pople, J. A.; Gaussian, Inc., Pittsburgh PA, 2003

## Table of Content

|                                                                                           |                        |
|-------------------------------------------------------------------------------------------|------------------------|
| <b>Table S1.</b> Summary of BDEs of various mono-chloro heterocycles                      | <i>page S3</i>         |
| <b>Table S2.</b> Spin distribution of radicals; details of computation and error analysis | <i>page S4</i>         |
| Molecular Geometries: B3LYP/6-31g(d)                                                      | <i>page S5-S331</i>    |
| Chlorofurans                                                                              | <i>page S5-S15</i>     |
| Chlorooxatriazoles                                                                        | <i>pages S16-S17</i>   |
| Chlorotriazines                                                                           | <i>pages S18-S21</i>   |
| Chlorotriazoles                                                                           | <i>pages S22-S25</i>   |
| Chlorooxadiazoles                                                                         | <i>pages S26-S33</i>   |
| Chlorotriazines                                                                           | <i>pages S34-S41</i>   |
| Chlorotriazoles                                                                           | <i>pages S42-S46</i>   |
| Chlorobenzofurans                                                                         | <i>pages S47-S56</i>   |
| Chlorobenzothiazoles                                                                      | <i>pages S57-S66</i>   |
| Chlorobenzothiophene                                                                      | <i>pages S67-S78</i>   |
| Chloroimidazoles                                                                          | <i>pages S79-S93</i>   |
| Chloroindoles                                                                             | <i>pages S94-S105</i>  |
| Chloroisoquinolines                                                                       | <i>pages S106-S119</i> |
| Chloroisothiazoles                                                                        | <i>pages S120-S128</i> |
| Chloroisoxazole                                                                           | <i>pages S129-S134</i> |
| Chloropyrazoles                                                                           | <i>pages S135-S40</i>  |
| Chloropyridazine                                                                          | <i>pages S141-S142</i> |

|                                                |                        |
|------------------------------------------------|------------------------|
| Chloropyridines                                | <i>pages S143-S155</i> |
| Chloropyrimidines                              | <i>pages S156-S164</i> |
| Chloropyrroles                                 | <i>pages S165-S169</i> |
| Chloroquinazoline                              | <i>pages S170-S181</i> |
| Chloroquinolines                               | <i>pages S182-S193</i> |
| Chloroquinoxalines                             | <i>pages S194-S205</i> |
| Chlorooxazoles                                 | <i>pages S206-S211</i> |
| Chlorothiazoles                                | <i>pages S212-S220</i> |
| Chlorothiophenes                               | <i>pages S221-S228</i> |
| Chloropyrazines                                | <i>pages S229-S230</i> |
| Bromopyrazines                                 | <i>pages S231-S231</i> |
| Bromofurans                                    | <i>pages S232-S241</i> |
| Bromoimidazoles                                | <i>pages S242-S256</i> |
| Bromothiazole                                  | <i>pages S257-S268</i> |
| Bromoisothiazoles                              | <i>pages S269-S277</i> |
| Bromoisoxazoles                                | <i>pages S278-S280</i> |
| Bromopyrazoles                                 | <i>pages S281-S284</i> |
| Bromopyridazines                               | <i>pages S285-S287</i> |
| Bromopyridines                                 | <i>pages S288-S299</i> |
| Bromopyrimidines                               | <i>pages S300-S311</i> |
| Bromopyrroles                                  | <i>pages S312-S318</i> |
| Bromoxazoles                                   | <i>pages S319-S321</i> |
| Bromothiophenes                                | <i>pages S322-S331</i> |
| Molecular Geometries: G3B3                     | <i>pages S332-S515</i> |
| Chlorooxatriazoles                             | <i>pages S332-S333</i> |
| Chlorotriazines                                | <i>pages S334-S344</i> |
| Chlorotriazoles                                | <i>pages S345-S348</i> |
| Chlorooxadiazoles                              | <i>pages S349-S352</i> |
| Chlorotriazoles                                | <i>pages S353-S356</i> |
| Chlorooxadiazoles                              | <i>pages S357-S360</i> |
| Chlorofurans                                   | <i>pages S361-S371</i> |
| <br>                                           |                        |
| Chloroimidazoles                               | <i>pages S372-S386</i> |
| <br>                                           |                        |
| Chloroisothiazoles                             | <i>pages S387-S401</i> |
| Chloroisoxazoles                               | <i>pages S402-S407</i> |
| Chloropyrazines                                | <i>pages S408-S409</i> |
| Chloropyrazoles                                | <i>pages S412-S417</i> |
| Chlorpyridazines                               | <i>pages S416-S417</i> |
| Chloropyridines                                | <i>pages S418-S430</i> |
| Chloropyrimidines                              | <i>pages S431-S440</i> |
| Chloropyrroles                                 | <i>pages S441-S450</i> |
| Chlorooxazoles                                 | <i>pages S451-S456</i> |
| Chlorothiazoles                                | <i>pages S457-S470</i> |
| Chlorothiophenes                               | <i>pages S471-S483</i> |
| Bromine, Chlorine, Fluorine, Hydrogen Radicals | <i>pages S484-S489</i> |

**Table S1.** Summary of BDEs of various mono-chloro heterocycles. Energies in kcal/mol.

|                              | <b>BDE G3B3</b> | <b>BDE B3LYP</b> |
|------------------------------|-----------------|------------------|
| 2-chlorofuran                | 102.0           | 95.5             |
| 3-chlorofuran                | 101.4           | 95.5             |
| 2-chloropyrrole              | 101.9           | 96.3             |
| 3-chloropyrrole              | 101.5           | 96.3             |
| 2-chlorothiophene            | 98.8            | 92.5             |
| 3-chlorothiophene            | 98.6            | 92.2             |
| 2-chloroimidazole            | 99.4            | 93.3             |
| 4-chloroimidazole            | 100.4           | 94.3             |
| 5-chloroimidazole            | 101.3           | 95.4             |
| 2-chlorooxazole              | 100.3           | 94.0             |
| 4-chlorooxazole              | 101.1           | 94.3             |
| 5-chlorooxazole              | 102.3           | 95.7             |
| 2-chlorothiazole             | 93.7            | 87.4             |
| 4-chlorothiazole             | 97.8            | 90.8             |
| 5-chlorothiazole             | 98.8            | 92.4             |
| 3-chloroisothiazole          | 94.7            | 87.9             |
| 4-chloroisothiazole          | 98.6            | 92.1             |
| 5-chloroisothiazole          | 97.9            | 91.5             |
| 3-chloropyrazole             | 100.3           | 94.3             |
| 4-chloropyrazole             | 101.5           | 95.9             |
| 5-chloropyrazole             | 101.1           | 95.0             |
| 3-chloroisoxazole            | 99.0            | 92.2             |
| 4-chloroisoxazole            | 103.6           | 95.2             |
| 5-chloroisoxazole            | 100.5           | 93.4             |
| 4-chloro-1,2,3-triazole      | 102.1           | 94.7             |
| 5-chloro-1,2,3-triazole      | 101.9           | 94.8             |
| 3-chloro-1,2,4-triazole      | 100.7           | 94.5             |
| 5-chloro-1,2,4-triazole      | 99.9            | 93.5             |
| 3-chloro-1,2,4-oxadiazole    | 99.9            | 93.1             |
| 5-chloro-1,2,4-oxadiazole    | 99.8            | 93.3             |
| 3-chloro-1,2,5-oxadiazole    | 100.9           | 93.2             |
| 2-chloro-1,3,4-oxadiazole    | 101.3           | 94.5             |
| 4-chloro-1,2,3,5-oxatriazole | 103.9           | 95.3             |
| 2-chloropyridine             | 94.9            | 87.1             |
| 3-chloropyridine             | 99.2            | 90.6             |
| 4-chloropyridine             | 98.4            | 89.9             |

|                         |      |      |
|-------------------------|------|------|
| 4-chloropyridazine      | 93.3 | 86.7 |
| 4-chloropyridazine      | 94.7 | 87.9 |
| 2-chloropyrimidine      | 95.1 | 87.6 |
| 4-chloropyrimidine      | 93.7 | 86.0 |
| 5-chloropyrimidine      | 99.0 | 90.6 |
| 2-chloropyrazine        | 92.9 | 86.3 |
| 2-chloro-1,3,5-triazine | 92.7 | 86.6 |
| 3-chloro-1,3,5-triazine | 93.7 | 87.3 |
| 5-chloro-1,3,5-triazine | 90.6 | 83.8 |
| 6-chloro-1,3,5-triazine | 93.0 | 86.1 |
| 4-chloro-1,2,3-triazine | 91.6 | 84.6 |
| 5-chloro-1,2,3-triazine | 93.8 | 86.8 |

**Table S2.** Spin distribution of radicals

### Computational Details

All the molecular calculations were performed with the Gaussian 03 suite of programs. Geometry optimizations of the model systems in the gas phase were carried out with the B3LYP/6-31G(d) DFT method<sup>1</sup> or the G3B3 method.<sup>2</sup> Frequency calculations were performed to verify the nature of all the stationary points as either minima or transition states and to provide zero point energy corrections.

### Error Analysis

Bootstrapping with 10,000 samples was applied to determine the mean for slope, intercept and correlation coefficient ( $R^2$ ) using MATLAB<sup>3</sup>. The standard deviations were then calculated.

<sup>1</sup> 1 (a) Kohn, W.; Becke, A. D.; Parr, R. G., *J. Phys. Chem.* **1996**, *100*, 12974. (b) Becke, A. D., *J. Chem. Phys.* **1993**, *98*, 5648.

<sup>2</sup> Baboul, A. G.; Curtiss, L. A.; Redfern, P. C.; Raghavachari, K. *Journal of Chemical Physics* 1999, *110*, 7650.

<sup>3</sup> (© 1994-2009 The MathWorks, Inc.)

**Molecular Geometries: B3LYP/6-31g(d)****Chlorofurans**Supporting Information: **23dichlorofuran.out**-----  
Using Gaussian 03: IA32L-G03RevC.02 12-Jun-2004  
=====# opt=(modredundant) freq b3lyp/6-31g(d) geom=connectivity  
#N Geom=AllCheck Guess=Read SCRF=Check GenChk RB3LYP/6-31G(d) Freq  
-----Pointgroup= C1 Stoichiometry= C4H2Cl2O C1[X(C4H2Cl2O)] #Atoms= 9  
Charge = 0 Multiplicity = 1  
-----SCF Energy= -1149.20160382 Predicted Change= -6.159808D-07  
=====Optimization completed. {Found 2 times}  
Item Max Val. Criteria Pass? RMS Val. Criteria Pass?  
Force 0.00042 || 0.00045 [ YES ] 0.00010 || 0.00030 [ YES ]  
Displ 0.00162 || 0.00180 [ YES ] 0.00162 || 0.00180 [ YES ]  
-----Atomic Coordinates (Angstroms)  
Type X Y Z  
-----

|    |           |           |           |
|----|-----------|-----------|-----------|
| C  | 0.649092  | 0.028451  | -0.000073 |
| C  | -0.697381 | 0.249300  | 0.000013  |
| C  | -0.874667 | 1.671954  | -0.000303 |
| C  | 0.376976  | 2.199091  | 0.000290  |
| H  | -1.815018 | 2.203327  | -0.000463 |
| H  | 0.764706  | 3.205585  | 0.000568  |
| O  | 1.320657  | 1.207643  | -0.000078 |
| Cl | 1.577100  | -1.406111 | -0.000008 |
| Cl | -1.944104 | -0.944644 | 0.000065  |

-----  
Statistical Thermodynamic AnalysisTemperature= 298.150 Kelvin Pressure= 1.00000 Atm  
=====SCF Energy= -1149.20160382 Predicted Change= -6.159808D-07  
Zero-point correction (ZPE)= -1149.1501 0.05145  
Internal Energy (U)= -1149.1442 0.05736  
Enthalpy (H)= -1149.1432 0.05830  
Gibbs Free Energy (G)= -1149.1811 0.02040  
-----

Frequencies -- 166.9349 200.4057 254.4006

Supporting Information: **24dichlorofuran.out**

-----  
 Using Gaussian 03: IA32L-G03RevC.02 12-Jun-2004  
 =====

# opt=(modredundant) freq b3lyp/6-31g(d) geom=connectivity  
 #N Geom=AllCheck Guess=Read SCRF=Check GenChk RB3LYP/6-31G(d) Freq  
 -----

Pointgroup= C1 Stoichiometry= C4H2Cl2O C1[X(C4H2Cl2O)] #Atoms= 9  
 Charge = 0 Multiplicity = 1  
 -----

SCF Energy= -1149.20261074 Predicted Change= -6.107650D-08  
 =====

Optimization completed. {Found 2 times}  
 Item Max Val. Criteria Pass? RMS Val. Criteria Pass?  
 Force 0.00007 || 0.00045 [ YES ] 0.00002 || 0.00030 [ YES ]  
 Displ 0.00059 || 0.00180 [ YES ] 0.00059 || 0.00180 [ YES ]  
 -----

Atomic Coordinates (Angstroms)  
 Type X Y Z  
 -----

|    |           |           |           |
|----|-----------|-----------|-----------|
| C  | 0.631204  | 1.319496  | 0.000174  |
| C  | 1.125573  | 0.052123  | -0.000157 |
| C  | 0.012355  | -0.850998 | 0.000257  |
| C  | -1.080943 | -0.040951 | 0.000150  |
| H  | 1.078239  | 2.300039  | 0.000218  |
| H  | 0.034860  | -1.929805 | 0.000357  |
| O  | -0.737616 | 1.270488  | 0.000205  |
| Cl | 2.798390  | -0.396672 | -0.000524 |
| Cl | -2.759644 | -0.392278 | 0.000244  |

-----

## Statistical Thermodynamic Analysis

Temperature= 298.150 Kelvin Pressure= 1.00000 Atm  
 =====

SCF Energy= -1149.20261074 Predicted Change= -6.107650D-08  
 Zero-point correction (ZPE)= -1149.1512 0.05132  
 Internal Energy (U)= -1149.1453 0.05725  
 Enthalpy (H)= -1149.1444 0.05819  
 Gibbs Free Energy (G)= -1149.1823 0.02027  
 -----

Frequencies -- 145.9445 201.4910 308.4873

Supporting Information: **2chloro3radicalfuran.out**

-----  
 Using Gaussian 03: IA32L-G03RevC.02 12-Jun-2004  
 =====

# opt nosymm freq ub3lyp/6-31g(d) geom=connectivity  
 #N Geom=AllCheck Guess=Read SCRF=Check GenChk UB3LYP/6-31G(d) Freq  
 -----

Pointgroup= C1 Stoichiometry= C4H2ClO(2) C1[X(C4H2ClO)] #Atoms= 8  
 Charge = 0 Multiplicity = 2  
 -----

SCF Energy= -688.911255026 Predicted Change= -5.092640D-08  
 =====

Optimization completed. {Found 2 times}  
 Item Max Val. Criteria Pass? RMS Val. Criteria Pass?  
 Force 0.00006 || 0.00045 [ YES ] 0.00002 || 0.00030 [ YES ]  
 Displ 0.00045 || 0.00180 [ YES ] 0.00045 || 0.00180 [ YES ]  
 -----

Atomic Coordinates (Angstroms)  
 Type X Y Z  
 -----

|    |           |           |           |
|----|-----------|-----------|-----------|
| C  | 0.647829  | 0.017251  | -0.000076 |
| C  | -0.680628 | 0.263910  | -0.000318 |
| C  | -0.887040 | 1.672408  | -0.000148 |
| C  | 0.372870  | 2.194904  | 0.000131  |
| H  | -1.820392 | 2.215993  | -0.000267 |
| H  | 0.760036  | 3.202475  | 0.000323  |
| O  | 1.323995  | 1.206971  | 0.000329  |
| Cl | 1.584795  | -1.414672 | -0.000027 |

-----

## Statistical Thermodynamic Analysis

Temperature= 298.150 Kelvin Pressure= 1.00000 Atm  
 =====

SCF Energy= -688.911255026 Predicted Change= -5.092640D-08  
 Zero-point correction (ZPE)= -688.8630 0.04815  
 Internal Energy (U)= -688.8583 0.05290  
 Enthalpy (H)= -688.8574 0.05384  
 Gibbs Free Energy (G)= -688.8924 0.01882  
 -----

Frequencies -- 208.7715 313.7409 494.8119

Supporting Information: **2chloro4radicalfuran.out**

-----  
 Using Gaussian 03: IA32L-G03RevC.02 12-Jun-2004  
 =====

# opt nosymm freq ub3lyp/6-31g(d) geom=connectivity  
 #N Geom=AllCheck Guess=Read SCRF=Check GenChk UB3LYP/6-31G(d) Freq  
 -----

Pointgroup= C1 Stoichiometry= C4H2ClO(2) C1[X(C4H2ClO)] #Atoms= 8  
 Charge = 0 Multiplicity = 2  
 -----

SCF Energy= -688.913243602 Predicted Change= -3.113175D-07  
 =====

Optimization completed. {Found 2 times}  
 Item Max Val. Criteria Pass? RMS Val. Criteria Pass?  
 Force 0.00019 || 0.00045 [ YES ] 0.00006 || 0.00030 [ YES ]  
 Displ 0.00089 || 0.00180 [ YES ] 0.00089 || 0.00180 [ YES ]  
 -----

Atomic Coordinates (Angstroms)  
 Type X Y Z  
 -----

|    |           |           |           |
|----|-----------|-----------|-----------|
| C  | -0.240734 | 0.107022  | 0.000108  |
| C  | 0.591616  | 1.189777  | -0.000309 |
| C  | 1.885014  | 0.596415  | 0.000297  |
| C  | 1.781980  | -0.749168 | 0.000039  |
| H  | 0.311054  | 2.231634  | -0.000470 |
| H  | 2.464806  | -1.582029 | 0.000132  |
| O  | 0.434373  | -1.069635 | -0.000404 |
| Cl | -1.954548 | -0.008185 | 0.000159  |

-----

## Statistical Thermodynamic Analysis

Temperature= 298.150 Kelvin Pressure= 1.00000 Atm  
 =====

SCF Energy= -688.913243602 Predicted Change= -3.113175D-07  
 Zero-point correction (ZPE)= -688.8651 0.04808  
 Internal Energy (U)= -688.8604 0.05282  
 Enthalpy (H)= -688.8594 0.05377  
 Gibbs Free Energy (G)= -688.8944 0.01876  
 -----

Frequencies -- 223.2993 315.6892 489.2900



Supporting Information: **2chlorofuran.out**

-----  
 Using Gaussian 03: AM64L-G03RevC.02 12-Jun-2004  
 =====

# opt=(modredundant) freq b3lyp/6-31g(d) geom=connectivity  
 #N Geom=AllCheck Guess=Read SCRF=Check GenChk RB3LYP/6-31G(d) Freq  
 -----

Pointgroup= C1 Stoichiometry= C4H3ClO C1[X(C4H3ClO)] #Atoms= 9  
 Charge = 0 Multiplicity = 1  
 -----

SCF Energy= -689.612052325 Predicted Change= -8.280486D-08  
 =====

Optimization completed. {Found 2 times}  
 Item Max Val. Criteria Pass? RMS Val. Criteria Pass?  
 Force 0.00008 || 0.00045 [ YES ] 0.00002 || 0.00030 [ YES ]  
 Displ 0.00065 || 0.00180 [ YES ] 0.00065 || 0.00180 [ YES ]  
 -----

Atomic Coordinates (Angstroms)  
 Type X Y Z  
 -----

|    |           |           |           |
|----|-----------|-----------|-----------|
| C  | -0.245110 | 0.103410  | 0.000031  |
| C  | 0.595975  | 1.173034  | -0.000260 |
| C  | 1.918080  | 0.613205  | 0.000225  |
| C  | 1.766282  | -0.737739 | 0.000015  |
| H  | 0.312791  | 2.215033  | -0.000420 |
| H  | 2.852926  | 1.156138  | 0.000467  |
| H  | 2.449007  | -1.572893 | 0.000069  |
| O  | 0.436357  | -1.068887 | -0.000182 |
| Cl | -1.959821 | -0.009332 | 0.000075  |

## Statistical Thermodynamic Analysis

Temperature= 298.150 Kelvin Pressure= 1.00000 Atm  
 =====

SCF Energy= -689.612052325 Predicted Change= -8.280486D-08  
 Zero-point correction (ZPE)= -689.5512 0.06078  
 Internal Energy (U)= -689.5465 0.06554  
 Enthalpy (H)= -689.5455 0.06648  
 Gibbs Free Energy (G)= -689.5799 0.03207  
 -----

Frequencies -- 222.7153 313.0202 490.6118

Supporting Information: **3chlorofuran.out**

-----  
 Using Gaussian 03: IA32L-G03RevC.02 12-Jun-2004  
 =====

# opt=(modredundant) freq b3lyp/6-31g(d) geom=connectivity  
 #N Geom=AllCheck Guess=Read SCRF=Check GenChk RB3LYP/6-31G(d) Freq  
 -----

Pointgroup= C1 Stoichiometry= C4H3ClO C1[X(C4H3ClO)] #Atoms= 9  
 Charge = 0 Multiplicity = 1  
 -----

SCF Energy= -689.612143265 Predicted Change= -7.852386D-08  
 =====

Optimization completed. {Found 2 times}  
 Item Max Val. Criteria Pass? RMS Val. Criteria Pass?  
 Force 0.00004 || 0.00045 [ YES ] 0.00002 || 0.00030 [ YES ]  
 Displ 0.00089 || 0.00180 [ YES ] 0.00089 || 0.00180 [ YES ]  
 -----

Atomic Coordinates (Angstroms)  
 Type X Y Z  
 -----

|    |           |           |           |
|----|-----------|-----------|-----------|
| C  | -0.525967 | -1.098042 | 0.000265  |
| C  | 0.274453  | 0.003474  | -0.000045 |
| C  | -0.580378 | 1.153317  | 0.000344  |
| C  | -1.846141 | 0.655583  | -0.000257 |
| H  | -0.332786 | -2.158720 | 0.000400  |
| H  | -0.277794 | 2.190144  | 0.000586  |
| H  | -2.823499 | 1.113136  | -0.000495 |
| O  | -1.831522 | -0.707909 | -0.000093 |
| Cl | 2.009086  | 0.013690  | -0.000094 |

-----

## Statistical Thermodynamic Analysis

Temperature= 298.150 Kelvin Pressure= 1.00000 Atm  
 =====

SCF Energy= -689.612143265 Predicted Change= -7.852386D-08  
 Zero-point correction (ZPE)= -689.5512 0.06091  
 Internal Energy (U)= -689.5464 0.06567  
 Enthalpy (H)= -689.5455 0.06662  
 Gibbs Free Energy (G)= -689.5799 0.03217  
 -----

Frequencies -- 249.9773 294.0200 476.6345

Supporting Information: **3chlorofuranradical.out**

-----  
 Using Gaussian 03: IA32L-G03RevC.02 12-Jun-2004  
 =====

# opt nosymm freq ub3lyp/6-31g(d) geom=connectivity  
 #N Geom=AllCheck Guess=Read SCRF=Check GenChk UB3LYP/6-31G(d) Freq  
 -----

Pointgroup= C1 Stoichiometry= C4H3O(2) C1[X(C4H3O)] #Atoms= 8  
 Charge = 0 Multiplicity = 2  
 -----

SCF Energy= -229.321688517 Predicted Change= -4.417062D-07  
 =====

Optimization completed. {Found 2 times}  
 Item Max Val. Criteria Pass? RMS Val. Criteria Pass?  
 Force 0.00010 || 0.00045 [ YES ] 0.00005 || 0.00030 [ YES ]  
 Displ 0.00143 || 0.00180 [ YES ] 0.00143 || 0.00180 [ YES ]  
 -----

Atomic Coordinates (Angstroms)  
 Type X Y Z  
 -----

|   |           |           |           |
|---|-----------|-----------|-----------|
| C | -0.514845 | -1.106956 | 0.000256  |
| C | 0.255277  | 0.003595  | -0.000328 |
| C | -0.572597 | 1.161807  | 0.000526  |
| C | -1.840368 | 0.655687  | -0.000467 |
| H | -0.335884 | -2.169464 | 0.000229  |
| H | -0.283252 | 2.202443  | 0.000764  |
| H | -2.818549 | 1.113316  | -0.000836 |
| O | -1.833417 | -0.709444 | 0.000562  |

-----

## Statistical Thermodynamic Analysis

Temperature= 298.150 Kelvin Pressure= 1.00000 Atm  
 =====

SCF Energy= -229.321688517 Predicted Change= -4.417062D-07  
 Zero-point correction (ZPE)= -229.2641 0.05751  
 Internal Energy (U)= -229.2604 0.06121  
 Enthalpy (H)= -229.2595 0.06216  
 Gibbs Free Energy (G)= -229.2910 0.03067  
 -----

Frequencies -- 546.0974 616.8987 695.5559

Supporting Information: **4chloro2radicalfuran.out**

-----  
 Using Gaussian 03: IA32L-G03RevC.02 12-Jun-2004  
 =====

# opt nosymm freq ub3lyp/6-31g(d) geom=connectivity  
 #N Geom=AllCheck Guess=Read SCRF=Check GenChk UB3LYP/6-31G(d) Freq  
 -----

Pointgroup= C1 Stoichiometry= C4H2ClO(2) C1[X(C4H2ClO)] #Atoms= 8  
 Charge = 0 Multiplicity = 2  
 -----

SCF Energy= -688.912883659 Predicted Change= -2.548945D-07  
 =====

Optimization completed. {Found 2 times}  
 Item Max Val. Criteria Pass? RMS Val. Criteria Pass?  
 Force 0.00014 || 0.00045 [ YES ] 0.00004 || 0.00030 [ YES ]  
 Displ 0.00106 || 0.00180 [ YES ] 0.00106 || 0.00180 [ YES ]  
 -----

Atomic Coordinates (Angstroms)  
 Type X Y Z  
 -----

|    |           |           |           |
|----|-----------|-----------|-----------|
| C  | -0.520768 | -1.105494 | -0.000205 |
| C  | 0.270673  | 0.001852  | 0.000422  |
| C  | -0.577897 | 1.169674  | -0.000092 |
| C  | -1.822996 | 0.631476  | 0.000448  |
| H  | -0.338549 | -2.167588 | -0.000492 |
| H  | -0.281227 | 2.206189  | -0.000269 |
| O  | -1.843330 | -0.699884 | 0.000648  |
| Cl | 2.003046  | 0.015313  | 0.000648  |

-----

## Statistical Thermodynamic Analysis

Temperature= 298.150 Kelvin Pressure= 1.00000 Atm  
 =====

SCF Energy= -688.912883659 Predicted Change= -2.548945D-07  
 Zero-point correction (ZPE)= -688.8650 0.04787  
 Internal Energy (U)= -688.8602 0.05266  
 Enthalpy (H)= -688.8592 0.05360  
 Gibbs Free Energy (G)= -688.8943 0.01851  
 -----

Frequencies -- 247.9059 296.9995 475.6145

Supporting Information: **2chloro3radicalfuran.out**

-----  
 Using Gaussian 03: IA32L-G03RevC.02 12-Jun-2004  
 =====

# opt nosymm freq ub3lyp/6-31g(d) geom=connectivity  
 #N Geom=AllCheck Guess=Read SCRF=Check GenChk UB3LYP/6-31G(d) Freq  
 -----

Pointgroup= C1 Stoichiometry= C4H2ClO(2) C1[X(C4H2ClO)] #Atoms= 8  
 Charge = 0 Multiplicity = 2  
 -----

SCF Energy= -688.911255026 Predicted Change= -5.092640D-08  
 =====

Optimization completed. {Found 2 times}  
 Item Max Val. Criteria Pass? RMS Val. Criteria Pass?  
 Force 0.00006 || 0.00045 [ YES ] 0.00002 || 0.00030 [ YES ]  
 Displ 0.00045 || 0.00180 [ YES ] 0.00045 || 0.00180 [ YES ]  
 -----

Atomic Coordinates (Angstroms)  
 Type X Y Z  
 -----

|    |           |           |           |
|----|-----------|-----------|-----------|
| C  | 0.647829  | 0.017251  | -0.000076 |
| C  | -0.680628 | 0.263910  | -0.000318 |
| C  | -0.887040 | 1.672408  | -0.000148 |
| C  | 0.372870  | 2.194904  | 0.000131  |
| H  | -1.820392 | 2.215993  | -0.000267 |
| H  | 0.760036  | 3.202475  | 0.000323  |
| O  | 1.323995  | 1.206971  | 0.000329  |
| Cl | 1.584795  | -1.414672 | -0.000027 |

-----

## Statistical Thermodynamic Analysis

Temperature= 298.150 Kelvin Pressure= 1.00000 Atm  
 =====

SCF Energy= -688.911255026 Predicted Change= -5.092640D-08  
 Zero-point correction (ZPE)= -688.8630 0.04815  
 Internal Energy (U)= -688.8583 0.05290  
 Enthalpy (H)= -688.8574 0.05384  
 Gibbs Free Energy (G)= -688.8924 0.01882  
 -----

Frequencies -- 208.7715 313.7409 494.8119

Supporting Information: **2chloro4radicalfuran.out**

-----  
 Using Gaussian 03: IA32L-G03RevC.02 12-Jun-2004  
 =====

# opt nosymm freq ub3lyp/6-31g(d) geom=connectivity  
 #N Geom=AllCheck Guess=Read SCRF=Check GenChk UB3LYP/6-31G(d) Freq  
 -----

Pointgroup= C1 Stoichiometry= C4H2ClO(2) C1[X(C4H2ClO)] #Atoms= 8  
 Charge = 0 Multiplicity = 2  
 -----

SCF Energy= -688.913243602 Predicted Change= -3.113175D-07  
 =====

Optimization completed. {Found 2 times}  
 Item Max Val. Criteria Pass? RMS Val. Criteria Pass?  
 Force 0.00019 || 0.00045 [ YES ] 0.00006 || 0.00030 [ YES ]  
 Displ 0.00089 || 0.00180 [ YES ] 0.00089 || 0.00180 [ YES ]  
 -----

Atomic Coordinates (Angstroms)  
 Type X Y Z  
 -----

|    |           |           |           |
|----|-----------|-----------|-----------|
| C  | -0.240734 | 0.107022  | 0.000108  |
| C  | 0.591616  | 1.189777  | -0.000309 |
| C  | 1.885014  | 0.596415  | 0.000297  |
| C  | 1.781980  | -0.749168 | 0.000039  |
| H  | 0.311054  | 2.231634  | -0.000470 |
| H  | 2.464806  | -1.582029 | 0.000132  |
| O  | 0.434373  | -1.069635 | -0.000404 |
| Cl | -1.954548 | -0.008185 | 0.000159  |

-----

## Statistical Thermodynamic Analysis

Temperature= 298.150 Kelvin Pressure= 1.00000 Atm  
 =====

SCF Energy= -688.913243602 Predicted Change= -3.113175D-07

Zero-point correction (ZPE)= -688.8651 0.04808

Internal Energy (U)= -688.8604 0.05282

Enthalpy (H)= -688.8594 0.05377

Gibbs Free Energy (G)= -688.8944 0.01876  
 -----

Frequencies -- 223.2993 315.6892 489.2900

Supporting Information: **furan.out**

-----  
 Using Gaussian 03: AM64L-G03RevC.02 12-Jun-2004  
 =====

# opt freq b3lyp/6-31g(d) geom=connectivity  
 #N Geom=AllCheck Guess=Read SCRF=Check GenChk RB3LYP/6-31G(d) Freq  
 -----

Pointgroup= C1 Stoichiometry= C4H4O C1[X(C4H4O)] #Atoms= 9  
 Charge = 0 Multiplicity = 1  
 -----

SCF Energy= -230.020581591 Predicted Change= -1.545275D-07  
 =====

Optimization completed. {Found 2 times}  
 Item Max Val. Criteria Pass? RMS Val. Criteria Pass?  
 Force 0.00017 || 0.00045 [ YES ] 0.00005 || 0.00030 [ YES ]  
 Displ 0.00050 || 0.00180 [ YES ] 0.00050 || 0.00180 [ YES ]  
 -----

Atomic Coordinates (Angstroms)  
 Type X Y Z  
 -----

|   |           |           |           |
|---|-----------|-----------|-----------|
| C | -1.094704 | -0.348288 | -0.000025 |
| C | -0.718703 | 0.959236  | 0.000119  |
| C | 0.717150  | 0.960338  | -0.000174 |
| C | 1.095249  | -0.346585 | 0.000174  |
| H | -2.049428 | -0.851751 | 0.000008  |
| H | 1.372101  | 1.820505  | -0.000260 |
| H | 2.050780  | -0.848514 | 0.000309  |
| O | 0.000961  | -1.160843 | -0.000105 |
| H | -1.375089 | 1.818301  | 0.000218  |

## Statistical Thermodynamic Analysis

Temperature= 298.150 Kelvin Pressure= 1.00000 Atm  
 =====

SCF Energy= -230.020581591 Predicted Change= -1.545275D-07  
 Zero-point correction (ZPE)= -229.9503 0.07020  
 Internal Energy (U)= -229.9466 0.07391  
 Enthalpy (H)= -229.9457 0.07486  
 Gibbs Free Energy (G)= -229.9766 0.04393  
 -----

Frequencies -- 613.8315 622.8532 722.6649

**Chlorooxatriazoles**Supporting Information: **4chloro1235oxatriazole.out**-----  
Using Gaussian 03: IA32L-G03RevC.02 12-Jun-2004

=====

# opt freq ub3lyp/6-31g(d) geom=connectivity

#N Geom=AllCheck Guess=Read SCRF=Check GenChk UB3LYP/6-31G(d) Freq

-----  
Pointgroup= C1 Stoichiometry= CCIN3O C1[X(CCIN3O)] #Atoms= 6

Charge = 0 Multiplicity = 1

-----  
SCF Energy= -737.661553111 Predicted Change= -8.972320D-07

=====

Optimization completed. {Found 2 times}

Item Max Val. Criteria Pass? RMS Val. Criteria Pass?

Force 0.00042 || 0.00045 [ YES ] 0.00014 || 0.00030 [ YES ]

Displ 0.00100 || 0.00180 [ YES ] 0.00100 || 0.00180 [ YES ]

-----  
Atomic Coordinates (Angstroms)  
Type X Y Z-----  
C -0.217092 -0.026018 -0.000404  
O 1.774732 -0.658651 -0.000218  
N 1.760174 0.747653 -0.000026  
N 0.558459 1.117736 0.000396  
N 0.498633 -1.117421 0.000448  
Cl -1.918598 0.011149 -0.000092-----  
Statistical Thermodynamic Analysis

Temperature= 298.150 Kelvin Pressure= 1.00000 Atm

=====

SCF Energy= -737.661553111 Predicted Change= -8.972320D-07

Zero-point correction (ZPE)= -737.6376 0.02386

Internal Energy (U)= -737.6333 0.02824

Enthalpy (H)= -737.6323 0.02919

Gibbs Free Energy (G)= -737.6661 -0.00461

-----  
Frequencies -- 268.8014 327.1403 512.3390



Supporting Information: **4radical1235oxatriazole.out**

-----  
 Using Gaussian 03: IA32L-G03RevC.02 12-Jun-2004  
 =====

# opt freq ub3lyp/6-31g(d) geom=connectivity  
 #N Geom=AllCheck Guess=Read SCRF=Check GenChk UB3LYP/6-31G(d) Freq  
 -----

Pointgroup= C1 Stoichiometry= CN3O(2) C1[X(CN3O)] #Atoms= 5  
 Charge = 0 Multiplicity = 2  
 -----

SCF Energy= -277.371134003 Predicted Change= -5.339342D-07  
 =====

Optimization completed. {Found 2 times}  
 Item Max Val. Criteria Pass? RMS Val. Criteria Pass?  
 Force 0.00038 || 0.00045 [ YES ] 0.00015 || 0.00030 [ YES ]  
 Displ 0.00087 || 0.00180 [ YES ] 0.00087 || 0.00180 [ YES ]  
 -----

Atomic Coordinates (Angstroms)  
 Type X Y Z  
 -----

|   |           |           |           |
|---|-----------|-----------|-----------|
| C | 0.162179  | 1.112467  | 0.000112  |
| O | 0.540548  | -0.924534 | -0.000092 |
| N | -0.853189 | -0.724599 | 0.000224  |
| N | -1.069737 | 0.521896  | -0.000243 |
| N | 1.166146  | 0.305772  | 0.000029  |

-----

## Statistical Thermodynamic Analysis

Temperature= 298.150 Kelvin Pressure= 1.00000 Atm  
 =====

SCF Energy= -277.371134003 Predicted Change= -5.339342D-07  
 Zero-point correction (ZPE)= -277.3510 0.02010  
 Internal Energy (U)= -277.3476 0.02351  
 Enthalpy (H)= -277.3466 0.02445  
 Gibbs Free Energy (G)= -277.3776 -0.00655  
 -----

Frequencies -- 619.1436 639.8160 684.9325

**Chlorotriazines**Supporting Information: **4chloro123triazine.out**-----  
Using Gaussian 03: IA32L-G03RevC.02 12-Jun-2004  
=====

# opt freq ub3lyp/6-31g(d) geom=connectivity

#N Geom=AllCheck Guess=Read SCRF=Check GenChk UB3LYP/6-31G(d) Freq  
-----

Pointgroup= C1 Stoichiometry= C3H2ClN3 C1[X(C3H2ClN3)] #Atoms= 9

Charge = 0 Multiplicity = 1  
-----SCF Energy= -739.890951584 Predicted Change= -4.308697D-07  
=====

Optimization completed. {Found 2 times}

Item Max Val. Criteria Pass? RMS Val. Criteria Pass?

Force 0.00025 || 0.00045 [ YES ] 0.00006 || 0.00030 [ YES ]

Displ 0.00115 || 0.00180 [ YES ] 0.00115 || 0.00180 [ YES ]  
-----

Atomic Coordinates (Angstroms)

Type X Y Z  
-----

N -0.148023 -1.174295 0.000025

C 0.455038 0.009832 0.000010

C -0.240940 1.213303 -0.000012

C -1.618484 1.066970 -0.000019

N -2.217376 -0.135330 0.000038

H 0.253494 2.177863 -0.000004

H -2.287159 1.923753 0.000018

N -1.479651 -1.230846 -0.000010

Cl 2.198549 -0.003468 -0.000015  
-----

Statistical Thermodynamic Analysis

Temperature= 298.150 Kelvin Pressure= 1.00000 Atm  
=====

SCF Energy= -739.890951584 Predicted Change= -4.308697D-07

Zero-point correction (ZPE)= -739.8371 0.05381

Internal Energy (U)= -739.8318 0.05910

Enthalpy (H)= -739.8309 0.06004

Gibbs Free Energy (G)= -739.8669 0.02404  
-----

Frequencies -- 161.0712 308.7783 346.7186

Supporting Information: **4radical123triazine.out**

-----  
 Using Gaussian 03: IA32L-G03RevC.02 12-Jun-2004  
 =====

# opt nosymm freq ub3lyp/6-31g(d) geom=connectivity  
 #N Geom=AllCheck Guess=Read SCRF=Check GenChk UB3LYP/6-31G(d) Freq  
 -----

Pointgroup= C1 Stoichiometry= C3H2N3(2) C1[X(C3H2N3)] #Atoms= 8  
 Charge = 0 Multiplicity = 2  
 -----

SCF Energy= -279.617474175 Predicted Change= -2.088777D-07  
 =====

Optimization completed. {Found 2 times}  
 Item Max Val. Criteria Pass? RMS Val. Criteria Pass?  
 Force 0.00023 || 0.00045 [ YES ] 0.00006 || 0.00030 [ YES ]  
 Displ 0.00094 || 0.00180 [ YES ] 0.00094 || 0.00180 [ YES ]  
 -----

Atomic Coordinates (Angstroms)  
 Type X Y Z  
 -----

|   |           |           |           |
|---|-----------|-----------|-----------|
| N | -0.131767 | -1.152680 | 0.000011  |
| C | 0.434068  | -0.002454 | 0.000002  |
| C | -0.231922 | 1.218441  | -0.000003 |
| C | -1.610204 | 1.068519  | 0.000004  |
| N | -2.203222 | -0.144664 | 0.000016  |
| H | 0.256775  | 2.186874  | -0.000005 |
| H | -2.288795 | 1.918440  | 0.000006  |
| N | -1.508034 | -1.241226 | 0.000015  |

-----

## Statistical Thermodynamic Analysis

Temperature= 298.150 Kelvin Pressure= 1.00000 Atm  
 =====

SCF Energy= -279.617474175 Predicted Change= -2.088777D-07  
 Zero-point correction (ZPE)= -279.5674 0.05003  
 Internal Energy (U)= -279.5631 0.05432  
 Enthalpy (H)= -279.5622 0.05526  
 Gibbs Free Energy (G)= -279.5954 0.02200  
 -----

Frequencies -- 294.0923 400.2499 573.4575

Supporting Information: **5chloro123triazine.out**

-----  
 Using Gaussian 03: IA32L-G03RevC.02 12-Jun-2004  
 =====

# opt freq ub31yp/6-31g(d) geom=connectivity  
 #N Geom=AllCheck Guess=Read SCRF=Check GenChk UB3LYP/6-31G(d) Freq  
 -----

Pointgroup= C1 Stoichiometry= C3H2ClN3 C1[X(C3H2ClN3)] #Atoms= 9  
 Charge = 0 Multiplicity = 1  
 -----

SCF Energy= -739.889064357 Predicted Change= -2.707878D-07  
 =====

Optimization completed. {Found 2 times}  
 Item Max Val. Criteria Pass? RMS Val. Criteria Pass?  
 Force 0.00018 || 0.00045 [ YES ] 0.00007 || 0.00030 [ YES ]  
 Displ 0.00065 || 0.00180 [ YES ] 0.00065 || 0.00180 [ YES ]  
 -----

Atomic Coordinates (Angstroms)  
 Type X Y Z  
 -----

|    |           |           |           |
|----|-----------|-----------|-----------|
| N  | -1.593987 | -1.154438 | 0.000006  |
| C  | -0.255087 | -1.176003 | -0.000001 |
| C  | 0.482987  | -0.000001 | -0.000004 |
| C  | -0.255089 | 1.176004  | -0.000003 |
| N  | -1.593985 | 1.154441  | 0.000010  |
| H  | 0.213170  | -2.156507 | -0.000006 |
| H  | 0.213172  | 2.156506  | 0.000001  |
| N  | -2.245496 | -0.000002 | 0.000004  |
| Cl | 2.221827  | 0.000000  | -0.000005 |

-----

## Statistical Thermodynamic Analysis

Temperature= 298.150 Kelvin Pressure= 1.00000 Atm  
 =====

SCF Energy= -739.889064357 Predicted Change= -2.707878D-07  
 Zero-point correction (ZPE)= -739.8351 0.05393  
 Internal Energy (U)= -739.8298 0.05925  
 Enthalpy (H)= -739.8288 0.06019  
 Gibbs Free Energy (G)= -739.8649 0.02412  
 -----

Frequencies -- 164.0609 285.5443 381.5774

Supporting Information: **5radical123triazine.out**

-----  
 Using Gaussian 03: IA32L-G03RevC.02 12-Jun-2004  
 =====

# opt nosymm freq ub3lyp/6-31g(d) geom=connectivity  
 #N Geom=AllCheck Guess=Read SCRF=Check GenChk UB3LYP/6-31G(d) Freq  
 -----

Pointgroup= C1 Stoichiometry= C3H2N3(2) C1[X(C3H2N3)] #Atoms= 8  
 Charge = 0 Multiplicity = 2  
 -----

SCF Energy= -279.612342445 Predicted Change= -3.181391D-08  
 =====

Optimization completed. {Found 2 times}  
 Item Max Val. Criteria Pass? RMS Val. Criteria Pass?  
 Force 0.00007 || 0.00045 [ YES ] 0.00002 || 0.00030 [ YES ]  
 Displ 0.00040 || 0.00180 [ YES ] 0.00040 || 0.00180 [ YES ]  
 -----

Atomic Coordinates (Angstroms)  
 Type X Y Z  
 -----

|   |           |           |           |
|---|-----------|-----------|-----------|
| N | -1.598741 | -1.150241 | 0.000004  |
| C | -0.239500 | -1.179841 | -0.000001 |
| C | 0.458637  | 0.000000  | -0.000004 |
| C | -0.239500 | 1.179841  | -0.000003 |
| N | -1.598740 | 1.150242  | 0.000006  |
| H | 0.202816  | -2.171480 | -0.000005 |
| H | 0.202817  | 2.171479  | 0.000003  |
| N | -2.222105 | 0.000000  | 0.000008  |

-----

## Statistical Thermodynamic Analysis

Temperature= 298.150 Kelvin Pressure= 1.00000 Atm  
 =====

SCF Energy= -279.612342445 Predicted Change= -3.181391D-08  
 Zero-point correction (ZPE)= -279.5618 0.05051  
 Internal Energy (U)= -279.5576 0.05469  
 Enthalpy (H)= -279.5567 0.05563  
 Gibbs Free Energy (G)= -279.5897 0.02257  
 -----

Frequencies -- 362.5321 365.9292 581.7408

**Chlorotriazoles**Supporting Information: **4chloro123triazole.out**-----  
Using Gaussian 03: IA32L-G03RevC.02 12-Jun-2004  
=====# opt freq ub3lyp/6-31g(d) geom=connectivity  
#N Geom=AllCheck Guess=Read SCRF=Check GenChk UB3LYP/6-31G(d) Freq  
-----Pointgroup= C1 Stoichiometry= C2H2ClN3 C1[X(C2H2ClN3)] #Atoms= 8  
Charge = 0 Multiplicity = 1  
-----SCF Energy= -701.812761511 Predicted Change= -1.329606D-07  
=====Optimization completed. {Found 2 times}  
Item Max Val. Criteria Pass? RMS Val. Criteria Pass?  
Force 0.00018 || 0.00045 [ YES ] 0.00005 || 0.00030 [ YES ]  
Displ 0.00077 || 0.00180 [ YES ] 0.00077 || 0.00180 [ YES ]  
-----Atomic Coordinates (Angstroms)  
Type X Y Z  
-----

|    |           |           |           |
|----|-----------|-----------|-----------|
| C  | -0.594780 | 1.102093  | 0.000051  |
| C  | 0.248913  | 0.012833  | -0.000018 |
| N  | -1.821740 | 0.526064  | 0.000110  |
| H  | -2.731218 | 0.967993  | 0.000178  |
| H  | -0.423623 | 2.166417  | 0.000054  |
| N  | -1.745961 | -0.821011 | 0.000020  |
| Cl | 1.973493  | 0.010591  | -0.000103 |
| N  | -0.477918 | -1.134197 | 0.000059  |

-----  
Statistical Thermodynamic AnalysisTemperature= 298.150 Kelvin Pressure= 1.00000 Atm  
=====SCF Energy= -701.812761511 Predicted Change= -1.329606D-07  
Zero-point correction (ZPE)= -701.7630 0.04969  
Internal Energy (U)= -701.7584 0.05430  
Enthalpy (H)= -701.7575 0.05525  
Gibbs Free Energy (G)= -701.7916 0.02108  
-----

Frequencies -- 258.2825 313.3851 492.5981

Supporting Information: **4radical123triazole.out**

-----  
 Using Gaussian 03: IA32L-G03RevC.02 12-Jun-2004  
 =====

# opt nosymm freq ub3lyp/6-31g(d) geom=connectivity  
 #N Geom=AllCheck Guess=Read SCRF=Check GenChk UB3LYP/6-31G(d) Freq  
 -----

Pointgroup= C1 Stoichiometry= C2H2N3(2) C1[X(C2H2N3)] #Atoms= 7  
 Charge = 0 Multiplicity = 2  
 -----

SCF Energy= -241.523484070 Predicted Change= -1.655325D-08  
 =====

Optimization completed. {Found 2 times}  
 Item Max Val. Criteria Pass? RMS Val. Criteria Pass?  
 Force 0.00005 || 0.00045 [ YES ] 0.00001 || 0.00030 [ YES ]  
 Displ 0.00025 || 0.00180 [ YES ] 0.00025 || 0.00180 [ YES ]  
 -----

Atomic Coordinates (Angstroms)  
 Type X Y Z  
 -----

|   |           |           |           |
|---|-----------|-----------|-----------|
| C | -0.589342 | 1.104579  | 0.000049  |
| C | 0.233598  | 0.001316  | 0.000011  |
| N | -1.821276 | 0.527507  | 0.000102  |
| H | -2.733172 | 0.966214  | 0.000152  |
| H | -0.421978 | 2.169083  | 0.000060  |
| N | -1.750895 | -0.822176 | 0.000089  |
| N | -0.463261 | -1.126331 | -0.000008 |

-----

## Statistical Thermodynamic Analysis

Temperature= 298.150 Kelvin Pressure= 1.00000 Atm  
 =====

SCF Energy= -241.523484070 Predicted Change= -1.655325D-08  
 Zero-point correction (ZPE)= -241.4772 0.04626  
 Internal Energy (U)= -241.4736 0.04983  
 Enthalpy (H)= -241.4727 0.05077  
 Gibbs Free Energy (G)= -241.5039 0.01953  
 -----

Frequencies -- 582.8429 612.7180 713.7587

Supporting Information: **5chloro123triazole.out**

-----  
 Using Gaussian 03: IA32L-G03RevC.02 12-Jun-2004  
 =====

# opt freq ub31yp/6-31g(d) geom=connectivity  
 #N Geom=AllCheck Guess=Read SCRF=Check GenChk UB3LYP/6-31G(d) Freq  
 -----

Pointgroup= C1 Stoichiometry= C2H2ClN3 C1[X(C2H2ClN3)] #Atoms= 8  
 Charge = 0 Multiplicity = 1  
 -----

SCF Energy= -701.810521244 Predicted Change= -8.543099D-08  
 =====

Optimization completed. {Found 2 times}  
 Item Max Val. Criteria Pass? RMS Val. Criteria Pass?  
 Force 0.00013 || 0.00045 [ YES ] 0.00004 || 0.00030 [ YES ]  
 Displ 0.00048 || 0.00180 [ YES ] 0.00048 || 0.00180 [ YES ]  
 -----

Atomic Coordinates (Angstroms)  
 Type X Y Z  
 -----

|    |           |           |           |
|----|-----------|-----------|-----------|
| C  | 0.241480  | 0.081935  | 0.000002  |
| C  | -0.646176 | 1.133456  | 0.000090  |
| N  | -0.544276 | -1.023093 | -0.000067 |
| H  | -0.268349 | -1.996074 | -0.000128 |
| H  | -0.450127 | 2.194757  | 0.000169  |
| N  | -1.853252 | -0.684487 | 0.000017  |
| Cl | 1.958387  | 0.007127  | 0.000021  |
| N  | -1.909034 | 0.620125  | -0.000086 |

-----

## Statistical Thermodynamic Analysis

Temperature= 298.150 Kelvin Pressure= 1.00000 Atm  
 =====

SCF Energy= -701.810521244 Predicted Change= -8.543099D-08

Zero-point correction (ZPE)= -701.7608 0.04969

Internal Energy (U)= -701.7561 0.05434

Enthalpy (H)= -701.7552 0.05529

Gibbs Free Energy (G)= -701.7895 0.02101  
 -----

Frequencies -- 243.6613 293.3372 491.4317



Supporting Information: **5radical123triazole.out**

-----  
 Using Gaussian 03: IA32L-G03RevC.02 12-Jun-2004  
 =====

# opt nosymm freq ub3lyp/6-31g(d) geom=connectivity  
 #N Geom=AllCheck Guess=Read SCRF=Check GenChk UB3LYP/6-31G(d) Freq  
 -----

Pointgroup= C1 Stoichiometry= C2H2N3(2) C1[X(C2H2N3)] #Atoms= 7  
 Charge = 0 Multiplicity = 2  
 -----

SCF Energy= -241.521030278 Predicted Change= -2.419596D-07  
 =====

Optimization completed. {Found 2 times}  
 Item Max Val. Criteria Pass? RMS Val. Criteria Pass?  
 Force 0.00016 || 0.00045 [ YES ] 0.00007 || 0.00030 [ YES ]  
 Displ 0.00047 || 0.00180 [ YES ] 0.00047 || 0.00180 [ YES ]  
 -----

Atomic Coordinates (Angstroms)  
 Type X Y Z  
 -----

|   |           |           |           |
|---|-----------|-----------|-----------|
| C | 0.223568  | 0.077537  | -0.000023 |
| C | -0.639343 | 1.144751  | 0.000040  |
| N | -0.539342 | -1.029781 | -0.000021 |
| H | -0.266774 | -2.002588 | -0.000062 |
| H | -0.451005 | 2.206064  | 0.000140  |
| N | -1.854496 | -0.691154 | -0.000220 |
| N | -1.902342 | 0.621790  | 0.000143  |

-----

## Statistical Thermodynamic Analysis

Temperature= 298.150 Kelvin Pressure= 1.00000 Atm  
 =====

SCF Energy= -241.521030278 Predicted Change= -2.419596D-07  
 Zero-point correction (ZPE)= -241.4748 0.04619  
 Internal Energy (U)= -241.4712 0.04978  
 Enthalpy (H)= -241.4702 0.05073  
 Gibbs Free Energy (G)= -241.5015 0.01943  
 -----

Frequencies -- 507.8437 614.1568 719.8586

**Chlorooxadiazoles**Supporting Information: **3chloro124oxadiazole.out**-----  
Using Gaussian 03: IA32L-G03RevC.02 12-Jun-2004  
=====# opt freq ub3lyp/6-31g(d) geom=connectivity  
#N Geom=AllCheck Guess=Read SCRF=Check GenChk UB3LYP/6-31G(d) Freq  
-----Pointgroup= C1 Stoichiometry= C2HCIN2O C1[X(C2HCIN2O)] #Atoms= 7  
Charge = 0 Multiplicity = 1  
-----SCF Energy= -721.675268212 Predicted Change= -5.549702D-07  
=====Optimization completed. {Found 2 times}  
Item Max Val. Criteria Pass? RMS Val. Criteria Pass?  
Force 0.00023 || 0.00045 [ YES ] 0.00007 || 0.00030 [ YES ]  
Displ 0.00115 || 0.00180 [ YES ] 0.00115 || 0.00180 [ YES ]  
-----Atomic Coordinates (Angstroms)  
Type X Y Z  
-----

|    |           |           |           |
|----|-----------|-----------|-----------|
| C  | 1.733446  | 0.646300  | 0.000343  |
| C  | -0.218438 | -0.003219 | 0.000657  |
| H  | 2.676701  | 1.175679  | 0.000103  |
| N  | 0.442972  | -1.134101 | -0.000219 |
| O  | 1.779261  | -0.690226 | -0.000186 |
| Cl | -1.932174 | 0.024801  | -0.000021 |
| N  | 0.535046  | 1.143534  | -0.000390 |

-----  
Statistical Thermodynamic AnalysisTemperature= 298.150 Kelvin Pressure= 1.00000 Atm  
=====SCF Energy= -721.675268212 Predicted Change= -5.549702D-07  
Zero-point correction (ZPE)= -721.6381 0.03713  
Internal Energy (U)= -721.6337 0.04153  
Enthalpy (H)= -721.6327 0.04247  
Gibbs Free Energy (G)= -721.6666 0.00865  
-----

Frequencies -- 261.7028 332.9190 504.8410

Supporting Information: **3radical124oxadiazole.out**

-----  
 Using Gaussian 03: IA32L-G03RevC.02 12-Jun-2004  
 =====

# opt nosymm freq ub3lyp/6-31g(d) geom=connectivity  
 #N Geom=AllCheck Guess=Read SCRF=Check GenChk UB3LYP/6-31G(d) Freq  
 -----

Pointgroup= C1 Stoichiometry= C2HN2O(2) C1[X(C2HN2O)] #Atoms= 6  
 Charge = 0 Multiplicity = 2  
 -----

SCF Energy= -261.388229628 Predicted Change= -1.020114D-07  
 =====

Optimization completed. {Found 2 times}  
 Item Max Val. Criteria Pass? RMS Val. Criteria Pass?  
 Force 0.00016 || 0.00045 [ YES ] 0.00005 || 0.00030 [ YES ]  
 Displ 0.00031 || 0.00180 [ YES ] 0.00031 || 0.00180 [ YES ]  
 -----

Atomic Coordinates (Angstroms)  
 Type X Y Z  
 -----

|   |           |           |           |
|---|-----------|-----------|-----------|
| C | 1.733448  | 0.644847  | -0.000007 |
| C | -0.191465 | -0.001375 | -0.000026 |
| H | 2.673024  | 1.181902  | 0.000024  |
| N | 0.411977  | -1.140860 | 0.000142  |
| O | 1.794252  | -0.689317 | -0.000111 |
| N | 0.527753  | 1.142770  | 0.000286  |

-----

## Statistical Thermodynamic Analysis

Temperature= 298.150 Kelvin Pressure= 1.00000 Atm  
 =====

SCF Energy= -261.388229628 Predicted Change= -1.020114D-07  
 Zero-point correction (ZPE)= -261.3548 0.03333  
 Internal Energy (U)= -261.3514 0.03678  
 Enthalpy (H)= -261.3504 0.03773  
 Gibbs Free Energy (G)= -261.3815 0.00664  
 -----

Frequencies -- 593.1878 651.4483 693.2252

Supporting Information: **5chloro124oxadiazole.out**

-----  
 Using Gaussian 03: IA32L-G03RevC.02 12-Jun-2004  
 =====

# opt freq ub3lyp/6-31g(d) geom=connectivity  
 #N Geom=AllCheck Guess=Read SCRF=Check GenChk UB3LYP/6-31G(d) Freq  
 -----

Pointgroup= C1 Stoichiometry= C2HCIN2O C1[X(C2HCIN2O)] #Atoms= 7  
 Charge = 0 Multiplicity = 1  
 -----

SCF Energy= -721.674851833 Predicted Change= -2.554823D-07  
 =====

Optimization completed. {Found 2 times}  
 Item Max Val. Criteria Pass? RMS Val. Criteria Pass?  
 Force 0.00026 || 0.00045 [ YES ] 0.00006 || 0.00030 [ YES ]  
 Displ 0.00050 || 0.00180 [ YES ] 0.00050 || 0.00180 [ YES ]  
 -----

Atomic Coordinates (Angstroms)  
 Type X Y Z  
 -----

|    |           |           |           |
|----|-----------|-----------|-----------|
| C  | -0.206234 | 0.092088  | -0.000177 |
| C  | 1.791335  | 0.586009  | -0.000169 |
| N  | 1.828490  | -0.720857 | 0.000173  |
| H  | 2.701850  | 1.170580  | 0.000014  |
| O  | 0.458981  | -1.068991 | -0.000030 |
| Cl | -1.909007 | 0.016741  | -0.000056 |
| N  | 0.538484  | 1.153453  | 0.000292  |

-----

## Statistical Thermodynamic Analysis

Temperature= 298.150 Kelvin Pressure= 1.00000 Atm  
 =====

SCF Energy= -721.674851833 Predicted Change= -2.554823D-07  
 Zero-point correction (ZPE)= -721.6377 0.03713  
 Internal Energy (U)= -721.6333 0.04154  
 Enthalpy (H)= -721.6323 0.04249  
 Gibbs Free Energy (G)= -721.6662 0.00864  
 -----

Frequencies -- 245.0276 327.3838 511.0732

Supporting Information: **5radical124oxadiazole.out**

-----  
 Using Gaussian 03: IA32L-G03RevC.02 12-Jun-2004  
 =====

# opt nosymm freq ub3lyp/6-31g(d) geom=connectivity  
 #N Geom=AllCheck Guess=Read SCRF=Check GenChk UB3LYP/6-31G(d) Freq  
 -----

Pointgroup= C1 Stoichiometry= C2HN2O(2) C1[X(C2HN2O)] #Atoms= 6  
 Charge = 0 Multiplicity = 2  
 -----

SCF Energy= -261.387643287 Predicted Change= -2.951091D-07  
 =====

Optimization completed. {Found 2 times}  
 Item Max Val. Criteria Pass? RMS Val. Criteria Pass?  
 Force 0.00030 || 0.00045 [ YES ] 0.00009 || 0.00030 [ YES ]  
 Displ 0.00048 || 0.00180 [ YES ] 0.00048 || 0.00180 [ YES ]  
 -----

Atomic Coordinates (Angstroms)  
 Type X Y Z  
 -----

|   |           |           |           |
|---|-----------|-----------|-----------|
| C | -0.181831 | 0.089548  | 0.000000  |
| C | 1.791897  | 0.586184  | 0.000070  |
| N | 1.840138  | -0.720461 | -0.000018 |
| H | 2.701196  | 1.173351  | 0.000060  |
| O | 0.433442  | -1.071689 | -0.000015 |
| N | 0.528063  | 1.155350  | 0.000005  |

-----

## Statistical Thermodynamic Analysis

Temperature= 298.150 Kelvin Pressure= 1.00000 Atm  
 =====

SCF Energy= -261.387643287 Predicted Change= -2.951091D-07  
 Zero-point correction (ZPE)= -261.3542 0.03338  
 Internal Energy (U)= -261.3508 0.03683  
 Enthalpy (H)= -261.3498 0.03778  
 Gibbs Free Energy (G)= -261.3809 0.00669  
 -----

Frequencies -- 599.1916 633.6765 719.1701

Supporting Information: **3chloro125oxadiazole.out**

-----  
 Using Gaussian 03: IA32L-G03RevC.02 12-Jun-2004  
 =====

# opt freq ub31yp/6-31g(d) geom=connectivity  
 #N Geom=AllCheck Guess=Read SCRF=Check GenChk UB3LYP/6-31G(d) Freq  
 -----

Pointgroup= C1 Stoichiometry= C2HCIN2O C1[X(C2HCIN2O)] #Atoms= 7  
 Charge = 0 Multiplicity = 1  
 -----

SCF Energy= -721.634651985 Predicted Change= -3.693500D-07  
 =====

Optimization completed. {Found 2 times}  
 Item Max Val. Criteria Pass? RMS Val. Criteria Pass?  
 Force 0.00021 || 0.00045 [ YES ] 0.00007 || 0.00030 [ YES ]  
 Displ 0.00150 || 0.00180 [ YES ] 0.00150 || 0.00180 [ YES ]  
 -----

Atomic Coordinates (Angstroms)  
 Type X Y Z  
 -----

|    |           |           |           |
|----|-----------|-----------|-----------|
| C  | 0.645557  | 1.106772  | 0.000008  |
| C  | -0.238899 | -0.011300 | -0.000068 |
| H  | 0.419660  | 2.163179  | 0.000065  |
| N  | 0.452670  | -1.119592 | 0.000177  |
| O  | 1.762246  | -0.710507 | -0.000265 |
| Cl | -1.954290 | 0.009218  | 0.000015  |
| N  | 1.870952  | 0.661212  | 0.000132  |

-----

## Statistical Thermodynamic Analysis

Temperature= 298.150 Kelvin Pressure= 1.00000 Atm  
 =====

SCF Energy= -721.634651985 Predicted Change= -3.693500D-07  
 Zero-point correction (ZPE)= -721.5982 0.03640  
 Internal Energy (U)= -721.5937 0.04088  
 Enthalpy (H)= -721.5928 0.04182  
 Gibbs Free Energy (G)= -721.6268 0.00784  
 -----

Frequencies -- 266.1600 308.9123 495.9116

Supporting Information: **3radical125oxadiazole.out**

-----  
 Using Gaussian 03: IA32L-G03RevC.02 12-Jun-2004  
 =====

# opt nosymm freq ub3lyp/6-31g(d) geom=connectivity  
 #N Geom=AllCheck Guess=Read SCRF=Check GenChk UB3LYP/6-31G(d) Freq  
 -----

Pointgroup= C1 Stoichiometry= C2HN2O(2) C1[X(C2HN2O)] #Atoms= 6  
 Charge = 0 Multiplicity = 2  
 -----

SCF Energy= -261.347451574 Predicted Change= -6.971327D-07  
 =====

Optimization completed. {Found 2 times}  
 Item Max Val. Criteria Pass? RMS Val. Criteria Pass?  
 Force 0.00031 || 0.00045 [ YES ] 0.00013 || 0.00030 [ YES ]  
 Displ 0.00131 || 0.00180 [ YES ] 0.00131 || 0.00180 [ YES ]  
 -----

Atomic Coordinates (Angstroms)  
 Type X Y Z  
 -----

|   |           |           |           |
|---|-----------|-----------|-----------|
| C | 0.642812  | 1.113947  | -0.000022 |
| C | -0.218338 | -0.020916 | 0.000264  |
| H | 0.417006  | 2.169345  | 0.000075  |
| N | 0.427443  | -1.124452 | -0.000325 |
| O | 1.774068  | -0.712508 | 0.000222  |
| N | 1.869196  | 0.664348  | -0.000165 |

-----

## Statistical Thermodynamic Analysis

Temperature= 298.150 Kelvin Pressure= 1.00000 Atm  
 =====

SCF Energy= -261.347451574 Predicted Change= -6.971327D-07  
 Zero-point correction (ZPE)= -261.3148 0.03261  
 Internal Energy (U)= -261.3113 0.03611  
 Enthalpy (H)= -261.3103 0.03706  
 Gibbs Free Energy (G)= -261.3415 0.00588  
 -----

Frequencies -- 590.8739 637.8888 718.4818

Supporting Information: **2chloro134oxadiazole.out**

-----  
 Using Gaussian 03: IA32L-G03RevC.02 12-Jun-2004  
 =====

# opt freq ub3lyp/6-31g(d) geom=connectivity  
 #N Geom=AllCheck Guess=Read SCRF=Check GenChk UB3LYP/6-31G(d) Freq  
 -----

Pointgroup= C1 Stoichiometry= C2HCIN2O C1[X(C2HCIN2O)] #Atoms= 7  
 Charge = 0 Multiplicity = 1  
 -----

SCF Energy= -721.681290129 Predicted Change= -6.089758D-07  
 =====

Optimization completed. {Found 2 times}  
 Item Max Val. Criteria Pass? RMS Val. Criteria Pass?  
 Force 0.00031 || 0.00045 [ YES ] 0.00012 || 0.00030 [ YES ]  
 Displ 0.00167 || 0.00180 [ YES ] 0.00167 || 0.00180 [ YES ]  
 -----

Atomic Coordinates (Angstroms)  
 Type X Y Z  
 -----

|    |           |           |           |
|----|-----------|-----------|-----------|
| C  | -0.211887 | 0.095012  | -0.000033 |
| C  | 1.777614  | -0.582860 | 0.000119  |
| H  | 2.583853  | -1.300493 | 0.000194  |
| N  | 1.841079  | 0.705928  | 0.000100  |
| O  | 0.501438  | -1.061967 | 0.000075  |
| Cl | -1.910338 | -0.020859 | -0.000120 |
| N  | 0.514068  | 1.162345  | 0.000004  |

-----

## Statistical Thermodynamic Analysis

Temperature= 298.150 Kelvin Pressure= 1.00000 Atm  
 =====

SCF Energy= -721.681290129 Predicted Change= -6.089758D-07  
 Zero-point correction (ZPE)= -721.6443 0.03697  
 Internal Energy (U)= -721.6398 0.04141  
 Enthalpy (H)= -721.6389 0.04235  
 Gibbs Free Energy (G)= -721.6728 0.00847  
 -----

Frequencies -- 243.5391 326.5867 510.0762



Supporting Information: **2radical134oxadiazole.out**

-----  
 Using Gaussian 03: IA32L-G03RevC.02 12-Jun-2004  
 =====

# opt nosymm freq ub3lyp/6-31g(d) geom=connectivity  
 #N Geom=AllCheck Guess=Read SCRF=Check GenChk UB3LYP/6-31G(d) Freq  
 -----

Pointgroup= C1 Stoichiometry= C2HN2O(2) C1[X(C2HN2O)] #Atoms= 6  
 Charge = 0 Multiplicity = 2  
 -----

SCF Energy= -261.392045917 Predicted Change= -6.536987D-08  
 =====

Optimization completed. {Found 2 times}  
 Item Max Val. Criteria Pass? RMS Val. Criteria Pass?  
 Force 0.00009 || 0.00045 [ YES ] 0.00003 || 0.00030 [ YES ]  
 Displ 0.00032 || 0.00180 [ YES ] 0.00032 || 0.00180 [ YES ]  
 -----

Atomic Coordinates (Angstroms)  
 Type X Y Z  
 -----

|   |           |           |           |
|---|-----------|-----------|-----------|
| C | -0.190284 | 0.098100  | 0.000025  |
| C | 1.777289  | -0.586662 | 0.000248  |
| H | 2.585735  | -1.302197 | 0.000249  |
| N | 1.846990  | 0.703032  | -0.000078 |
| O | 0.494386  | -1.066193 | -0.000077 |
| N | 0.492049  | 1.171886  | 0.000092  |

-----

## Statistical Thermodynamic Analysis

Temperature= 298.150 Kelvin Pressure= 1.00000 Atm  
 =====

SCF Energy= -261.392045917 Predicted Change= -6.536987D-08  
 Zero-point correction (ZPE)= -261.3588 0.03315  
 Internal Energy (U)= -261.3554 0.03661  
 Enthalpy (H)= -261.3544 0.03755  
 Gibbs Free Energy (G)= -261.3855 0.00646  
 -----

Frequencies -- 575.2518 641.4795 833.8866

**Chlorotriazines**Supporting Information: **3chloro124triazine.out**-----  
Using Gaussian 03: IA32L-G03RevC.02 12-Jun-2004  
=====# opt freq ub3lyp/6-31g(d) geom=connectivity  
#N Geom=AllCheck Guess=Read SCRF=Check GenChk UB3LYP/6-31G(d) Freq  
-----Pointgroup= C1 Stoichiometry= C3H2ClN3 C1[X(C3H2ClN3)] #Atoms= 9  
Charge = 0 Multiplicity = 1  
-----SCF Energy= -739.915719149 Predicted Change= -6.458443D-07  
=====Optimization completed. {Found 2 times}  
Item Max Val. Criteria Pass? RMS Val. Criteria Pass?  
Force 0.00037 || 0.00045 [ YES ] 0.00010 || 0.00030 [ YES ]  
Displ 0.00117 || 0.00180 [ YES ] 0.00117 || 0.00180 [ YES ]  
-----Atomic Coordinates (Angstroms)  
Type X Y Z  
-----

|    |           |           |           |
|----|-----------|-----------|-----------|
| N  | 0.140906  | -1.192192 | 0.000086  |
| C  | -0.432775 | 0.012658  | 0.000224  |
| C  | 1.490888  | 1.148428  | 0.000008  |
| C  | 2.151469  | -0.083995 | -0.000006 |
| N  | 1.475133  | -1.233423 | 0.000010  |
| H  | 2.030695  | 2.093254  | -0.000006 |
| H  | 3.234233  | -0.164189 | -0.000039 |
| N  | 0.162492  | 1.204874  | 0.000088  |
| Cl | -2.174831 | 0.009034  | -0.000153 |

-----  
Statistical Thermodynamic AnalysisTemperature= 298.150 Kelvin Pressure= 1.00000 Atm  
=====SCF Energy= -739.915719149 Predicted Change= -6.458443D-07  
Zero-point correction (ZPE)= -739.8612 0.05446  
Internal Energy (U)= -739.8560 0.05968  
Enthalpy (H)= -739.8550 0.06062  
Gibbs Free Energy (G)= -739.8909 0.02475  
-----

Frequencies -- 150.5453 326.4030 383.6515

Supporting Information: **3radical124triazine.out**

-----  
 Using Gaussian 03: IA32L-G03RevC.02 12-Jun-2004  
 =====

# opt nosymm freq ub3lyp/6-31g(d) geom=connectivity  
 #N Geom=AllCheck Guess=Read SCRF=Check GenChk UB3LYP/6-31G(d) Freq  
 -----

Pointgroup= C1 Stoichiometry= C3H2N3(2) C1[X(C3H2N3)] #Atoms= 8  
 Charge = 0 Multiplicity = 2  
 -----

SCF Energy= -279.638055941 Predicted Change= -9.508601D-07  
 =====

Optimization completed. {Found 2 times}  
 Item Max Val. Criteria Pass? RMS Val. Criteria Pass?  
 Force 0.00029 || 0.00045 [ YES ] 0.00012 || 0.00030 [ YES ]  
 Displ 0.00137 || 0.00180 [ YES ] 0.00137 || 0.00180 [ YES ]  
 -----

Atomic Coordinates (Angstroms)  
 Type X Y Z  
 -----

|   |           |           |           |
|---|-----------|-----------|-----------|
| N | 0.123193  | -1.190464 | 0.000121  |
| C | -0.402133 | 0.009843  | 0.000152  |
| C | 1.490857  | 1.157176  | 0.000021  |
| C | 2.142768  | -0.085764 | -0.000012 |
| N | 1.479822  | -1.240457 | 0.000035  |
| H | 2.035030  | 2.099312  | 0.000004  |
| H | 3.226851  | -0.161605 | -0.000070 |
| N | 0.156653  | 1.197375  | 0.000113  |

-----

## Statistical Thermodynamic Analysis

Temperature= 298.150 Kelvin Pressure= 1.00000 Atm  
 =====

SCF Energy= -279.638055941 Predicted Change= -9.508601D-07  
 Zero-point correction (ZPE)= -279.5871 0.05088  
 Internal Energy (U)= -279.5829 0.05506  
 Enthalpy (H)= -279.5820 0.05601  
 Gibbs Free Energy (G)= -279.6151 0.02292  
 -----

Frequencies -- 332.3374 372.4657 567.1194

Supporting Information: **5chloro124triazine.out**

-----  
 Using Gaussian 03: IA32L-G03RevC.02 12-Jun-2004  
 =====

# opt freq ub3lyp/6-31g(d) geom=connectivity  
 #N Geom=AllCheck Guess=Read SCRF=Check GenChk UB3LYP/6-31G(d) Freq  
 -----

Pointgroup= C1 Stoichiometry= C3H2ClN3 C1[X(C3H2ClN3)] #Atoms= 9  
 Charge = 0 Multiplicity = 1  
 -----

SCF Energy= -739.918965049 Predicted Change= -3.214709D-07  
 =====

Optimization completed. {Found 2 times}  
 Item Max Val. Criteria Pass? RMS Val. Criteria Pass?  
 Force 0.00030 || 0.00045 [ YES ] 0.00007 || 0.00030 [ YES ]  
 Displ 0.00059 || 0.00180 [ YES ] 0.00059 || 0.00180 [ YES ]  
 -----

Atomic Coordinates (Angstroms)  
 Type X Y Z  
 -----

|    |           |           |           |
|----|-----------|-----------|-----------|
| N  | 2.233427  | 0.014811  | 0.000013  |
| C  | 1.507092  | -1.101042 | 0.000019  |
| C  | -0.456399 | -0.035631 | -0.000012 |
| C  | 0.250815  | 1.178227  | 0.000000  |
| N  | 1.579589  | 1.182984  | 0.000008  |
| H  | 2.063343  | -2.034402 | -0.000007 |
| H  | -0.248676 | 2.141875  | 0.000002  |
| N  | 0.164722  | -1.191845 | -0.000004 |
| Cl | -2.203993 | -0.023438 | -0.000009 |

## Statistical Thermodynamic Analysis

Temperature= 298.150 Kelvin Pressure= 1.00000 Atm  
 =====

SCF Energy= -739.918965049 Predicted Change= -3.214709D-07  
 Zero-point correction (ZPE)= -739.8642 0.05474  
 Internal Energy (U)= -739.8589 0.05996  
 Enthalpy (H)= -739.8580 0.06091  
 Gibbs Free Energy (G)= -739.8939 0.02500  
 -----

Frequencies -- 158.3638 306.3030 379.8367

Supporting Information: **5radical124triazine.out**

-----  
 Using Gaussian 03: IA32L-G03RevC.02 12-Jun-2004  
 =====

# opt nosymm freq ub3lyp/6-31g(d) geom=connectivity  
 #N Geom=AllCheck Guess=Read SCRF=Check GenChk UB3LYP/6-31G(d) Freq  
 -----

Pointgroup= C1 Stoichiometry= C3H2N3(2) C1[X(C3H2N3)] #Atoms= 8  
 Charge = 0 Multiplicity = 2  
 -----

SCF Energy= -279.647127649 Predicted Change= -1.031448D-06  
 =====

Optimization completed. {Found 2 times}  
 Item Max Val. Criteria Pass? RMS Val. Criteria Pass?  
 Force 0.00039 || 0.00045 [ YES ] 0.00013 || 0.00030 [ YES ]  
 Displ 0.00098 || 0.00180 [ YES ] 0.00098 || 0.00180 [ YES ]  
 -----

Atomic Coordinates (Angstroms)  
 Type X Y Z  
 -----

|   |           |           |           |
|---|-----------|-----------|-----------|
| N | 2.221485  | 0.013726  | 0.000011  |
| C | 1.521159  | -1.116591 | -0.000030 |
| C | -0.454453 | -0.039492 | -0.000002 |
| C | 0.233344  | 1.184233  | 0.000003  |
| N | 1.570091  | 1.167868  | 0.000014  |
| H | 2.077248  | -2.049043 | 0.000029  |
| H | -0.245415 | 2.156907  | 0.000003  |
| N | 0.170454  | -1.162630 | -0.000009 |

-----

## Statistical Thermodynamic Analysis

Temperature= 298.150 Kelvin Pressure= 1.00000 Atm  
 =====

SCF Energy= -279.647127649 Predicted Change= -1.031448D-06  
 Zero-point correction (ZPE)= -279.5956 0.05143  
 Internal Energy (U)= -279.5915 0.05557  
 Enthalpy (H)= -279.5906 0.05651  
 Gibbs Free Energy (G)= -279.6236 0.02350  
 -----

Frequencies -- 324.9214 402.3258 596.8091

Supporting Information: **6chloro124triazine.out**

-----  
 Using Gaussian 03: IA32L-G03RevC.02 12-Jun-2004  
 =====

# opt freq ub3lyp/6-31g(d) geom=connectivity  
 #N Geom=AllCheck Guess=Read SCRF=Check GenChk UB3LYP/6-31G(d) Freq  
 -----

Pointgroup= C1 Stoichiometry= C3H2ClN3 C1[X(C3H2ClN3)] #Atoms= 9  
 Charge = 0 Multiplicity = 1  
 -----

SCF Energy= -739.915923353 Predicted Change= -3.574670D-07  
 =====

Optimization completed. {Found 2 times}  
 Item Max Val. Criteria Pass? RMS Val. Criteria Pass?  
 Force 0.00035 || 0.00045 [ YES ] 0.00008 || 0.00030 [ YES ]  
 Displ 0.00085 || 0.00180 [ YES ] 0.00085 || 0.00180 [ YES ]  
 -----

Atomic Coordinates (Angstroms)  
 Type X Y Z  
 -----

|    |           |           |           |
|----|-----------|-----------|-----------|
| N  | 1.495028  | -1.213194 | -0.000006 |
| C  | 2.135933  | -0.045337 | -0.000004 |
| C  | 0.258404  | 1.194713  | 0.000007  |
| C  | -0.449049 | -0.019674 | 0.000001  |
| N  | 0.155174  | -1.195471 | -0.000005 |
| H  | 3.220633  | -0.103319 | 0.000009  |
| H  | -0.254202 | 2.153935  | 0.000010  |
| N  | 1.581825  | 1.179427  | 0.000007  |
| Cl | -2.191903 | -0.013186 | -0.000001 |

-----

## Statistical Thermodynamic Analysis

Temperature= 298.150 Kelvin Pressure= 1.00000 Atm  
 =====

SCF Energy= -739.915923353 Predicted Change= -3.574670D-07  
 Zero-point correction (ZPE)= -739.8612 0.05462  
 Internal Energy (U)= -739.8560 0.05986  
 Enthalpy (H)= -739.8551 0.06080  
 Gibbs Free Energy (G)= -739.8910 0.02490  
 -----

Frequencies -- 164.8113 304.4661 391.9737

Supporting Information: **6radical124triazine.out**

-----  
 Using Gaussian 03: IA32L-G03RevC.02 12-Jun-2004  
 =====

# opt nosymm freq ub3lyp/6-31g(d) geom=connectivity  
 #N Geom=AllCheck Guess=Read SCRF=Check GenChk UB3LYP/6-31G(d) Freq  
 -----

Pointgroup= C1 Stoichiometry= C3H2N3(2) C1[X(C3H2N3)] #Atoms= 8  
 Charge = 0 Multiplicity = 2  
 -----

SCF Energy= -279.640386728 Predicted Change= -1.216984D-06  
 =====

Optimization completed. {Found 2 times}  
 Item Max Val. Criteria Pass? RMS Val. Criteria Pass?  
 Force 0.00041 || 0.00045 [ YES ] 0.00013 || 0.00030 [ YES ]  
 Displ 0.00152 || 0.00180 [ YES ] 0.00152 || 0.00180 [ YES ]  
 -----

Atomic Coordinates (Angstroms)  
 Type X Y Z  
 -----

|   |           |           |           |
|---|-----------|-----------|-----------|
| N | 1.512968  | -1.236981 | -0.000003 |
| C | 2.132974  | -0.056705 | -0.000018 |
| C | 0.241001  | 1.200500  | 0.000015  |
| C | -0.438138 | -0.029517 | 0.000000  |
| N | 0.161449  | -1.157785 | -0.000005 |
| H | 3.219113  | -0.100271 | 0.000017  |
| H | -0.253956 | 2.167347  | 0.000008  |
| N | 1.568336  | 1.164492  | 0.000005  |

-----

## Statistical Thermodynamic Analysis

Temperature= 298.150 Kelvin Pressure= 1.00000 Atm  
 =====

SCF Energy= -279.640386728 Predicted Change= -1.216984D-06  
 Zero-point correction (ZPE)= -279.5891 0.05119  
 Internal Energy (U)= -279.5850 0.05538  
 Enthalpy (H)= -279.5840 0.05632  
 Gibbs Free Energy (G)= -279.6171 0.02323  
 -----

Frequencies -- 337.1451 378.1635 549.1041

Supporting Information: **2chloro135triazine.out**

-----  
 Using Gaussian 03: IA32L-G03RevC.02 12-Jun-2004  
 =====

# opt freq ub3lyp/6-31g(d) geom=connectivity  
 #N Geom=AllCheck Guess=Read SCRF=Check GenChk UB3LYP/6-31G(d) Freq  
 -----

Pointgroup= C1 Stoichiometry= C3H2ClN3 C1[X(C3H2ClN3)] #Atoms= 9  
 Charge = 0 Multiplicity = 1  
 -----

SCF Energy= -739.960942391 Predicted Change= -4.730537D-07  
 =====

Optimization completed. {Found 2 times}  
 Item Max Val. Criteria Pass? RMS Val. Criteria Pass?  
 Force 0.00022 || 0.00045 [ YES ] 0.00008 || 0.00030 [ YES ]  
 Displ 0.00076 || 0.00180 [ YES ] 0.00076 || 0.00180 [ YES ]  
 -----

Atomic Coordinates (Angstroms)  
 Type X Y Z  
 -----

|    |           |           |           |
|----|-----------|-----------|-----------|
| C  | 1.491945  | 1.119086  | 0.000009  |
| N  | 0.156328  | 1.189102  | -0.000004 |
| C  | -0.437962 | 0.000077  | -0.000022 |
| C  | 1.492213  | -1.118929 | -0.000008 |
| N  | 2.221755  | -0.000166 | 0.000013  |
| H  | 2.028608  | 2.065334  | 0.000013  |
| H  | 2.028072  | -2.065727 | 0.000014  |
| N  | 0.156067  | -1.189039 | 0.000000  |
| Cl | -2.180759 | -0.000017 | 0.000002  |

## Statistical Thermodynamic Analysis

Temperature= 298.150 Kelvin Pressure= 1.00000 Atm  
 =====

SCF Energy= -739.960942391 Predicted Change= -4.730537D-07  
 Zero-point correction (ZPE)= -739.9051 0.05577  
 Internal Energy (U)= -739.9000 0.06090  
 Enthalpy (H)= -739.8990 0.06185  
 Gibbs Free Energy (G)= -739.9348 0.02611  
 -----

Frequencies -- 155.0728 333.1212 365.9962



Supporting Information: **2radical135triazine.out**

-----  
 Using Gaussian 03: IA32L-G03RevC.02 12-Jun-2004  
 =====

# opt nosymm freq ub3lyp/6-31g(d) geom=connectivity  
 #N Geom=AllCheck Guess=Read SCRF=Check GenChk UB3LYP/6-31G(d) Freq  
 -----

Pointgroup= C1 Stoichiometry= C3H2N3(2) C1[X(C3H2N3)] #Atoms= 8  
 Charge = 0 Multiplicity = 2  
 -----

SCF Energy= -279.684520285 Predicted Change= -2.411303D-07  
 =====

Optimization completed. {Found 2 times}  
 Item Max Val. Criteria Pass? RMS Val. Criteria Pass?  
 Force 0.00022 || 0.00045 [ YES ] 0.00007 || 0.00030 [ YES ]  
 Displ 0.00043 || 0.00180 [ YES ] 0.00043 || 0.00180 [ YES ]  
 -----

Atomic Coordinates (Angstroms)  
 Type X Y Z  
 -----

|   |           |           |           |
|---|-----------|-----------|-----------|
| C | 1.491639  | 1.126348  | -0.000002 |
| N | 0.146525  | 1.185006  | -0.000006 |
| C | -0.413335 | 0.000072  | -0.000017 |
| C | 1.491530  | -1.126431 | 0.000032  |
| N | 2.207257  | -0.000139 | 0.000015  |
| H | 2.033744  | 2.069582  | 0.000013  |
| H | 2.033380  | -2.069812 | -0.000008 |
| N | 0.146286  | -1.184888 | -0.000012 |

-----

## Statistical Thermodynamic Analysis

Temperature= 298.150 Kelvin Pressure= 1.00000 Atm  
 =====

SCF Energy= -279.684520285 Predicted Change= -2.411303D-07  
 Zero-point correction (ZPE)= -279.6322 0.05231  
 Internal Energy (U)= -279.6281 0.05640  
 Enthalpy (H)= -279.6271 0.05735  
 Gibbs Free Energy (G)= -279.6601 0.02441  
 -----

Frequencies -- 326.7783 388.1746 643.2910

**Chlorotriazoles**Supporting Information: **3chloro124triazole.out**-----  
Using Gaussian 03: IA32L-G03RevC.02 12-Jun-2004  
=====

# opt freq ub3lyp/6-31g(d) geom=connectivity

#N Geom=AllCheck Guess=Read SCRF=Check GenChk UB3LYP/6-31G(d) Freq  
-----

Pointgroup= C1 Stoichiometry= C2H2CIN3 C1[X(C2H2CIN3)] #Atoms= 8

Charge = 0 Multiplicity = 1  
-----SCF Energy= -701.840582235 Predicted Change= -5.505416D-07  
=====

Optimization completed. {Found 2 times}

Item Max Val. Criteria Pass? RMS Val. Criteria Pass?

Force 0.00037 || 0.00045 [ YES ] 0.00012 || 0.00030 [ YES ]

Displ 0.00060 || 0.00180 [ YES ] 0.00060 || 0.00180 [ YES ]  
-----

Atomic Coordinates (Angstroms)

Type X Y Z  
-----

C 1.738224 0.704206 0.000063

C -0.225201 0.006226 0.000035

N 1.737549 -0.645831 -0.000045

H 2.512158 -1.294664 -0.000121

H 2.637665 1.304650 0.000106

Cl -1.948386 0.000716 -0.000001

N 0.465771 -1.123382 -0.000076

N 0.495908 1.157104 0.000043  
-----

Statistical Thermodynamic Analysis

Temperature= 298.150 Kelvin Pressure= 1.00000 Atm  
=====

SCF Energy= -701.840582235 Predicted Change= -5.505416D-07

Zero-point correction (ZPE)= -701.7902 0.05037

Internal Energy (U)= -701.7856 0.05492

Enthalpy (H)= -701.7847 0.05587

Gibbs Free Energy (G)= -701.8187 0.02183  
-----

Frequencies -- 260.6474 336.3848 503.9055

Supporting Information: **3radical124triazole.out**

-----  
 Using Gaussian 03: IA32L-G03RevC.02 12-Jun-2004  
 =====

# opt nosymm freq ub3lyp/6-31g(d) geom=connectivity  
 #N Geom=AllCheck Guess=Read SCRF=Check GenChk UB3LYP/6-31G(d) Freq  
 -----

Pointgroup= C1 Stoichiometry= C2H2N3(2) C1[X(C2H2N3)] #Atoms= 7  
 Charge = 0 Multiplicity = 2  
 -----

SCF Energy= -241.551519047 Predicted Change= -1.358849D-07  
 =====

Optimization completed. {Found 2 times}  
 Item Max Val. Criteria Pass? RMS Val. Criteria Pass?  
 Force 0.00018 || 0.00045 [ YES ] 0.00006 || 0.00030 [ YES ]  
 Displ 0.00041 || 0.00180 [ YES ] 0.00041 || 0.00180 [ YES ]  
 -----

Atomic Coordinates (Angstroms)  
 Type X Y Z  
 -----

|   |           |           |           |
|---|-----------|-----------|-----------|
| C | 1.737028  | 0.703889  | 0.000112  |
| C | -0.206187 | 0.009566  | 0.000015  |
| N | 1.739570  | -0.647626 | -0.000087 |
| H | 2.517350  | -1.293670 | -0.000179 |
| H | 2.636829  | 1.304484  | 0.000152  |
| N | 0.450623  | -1.123919 | 0.000024  |
| N | 0.486861  | 1.155585  | -0.000031 |

-----

## Statistical Thermodynamic Analysis

Temperature= 298.150 Kelvin Pressure= 1.00000 Atm  
 =====

SCF Energy= -241.551519047 Predicted Change= -1.358849D-07  
 Zero-point correction (ZPE)= -241.5047 0.04680  
 Internal Energy (U)= -241.5011 0.05036  
 Enthalpy (H)= -241.5002 0.05131  
 Gibbs Free Energy (G)= -241.5314 0.02008  
 -----

Frequencies -- 517.6798 647.4229 672.1439

Supporting Information: **5chloro124triazole.out**

-----  
 Using Gaussian 03: IA32L-G03RevC.02 12-Jun-2004  
 =====

# opt freq ub3lyp/6-31g(d) geom=connectivity  
 #N Geom=AllCheck Guess=Read SCRF=Check GenChk UB3LYP/6-31G(d) Freq  
 -----

Pointgroup= C1 Stoichiometry= C2H2ClN3 C1[X(C2H2ClN3)] #Atoms= 8  
 Charge = 0 Multiplicity = 1  
 -----

SCF Energy= -701.840140515 Predicted Change= -7.426978D-07  
 =====

Optimization completed. {Found 2 times}  
 Item Max Val. Criteria Pass? RMS Val. Criteria Pass?  
 Force 0.00037 || 0.00045 [ YES ] 0.00013 || 0.00030 [ YES ]  
 Displ 0.00075 || 0.00180 [ YES ] 0.00075 || 0.00180 [ YES ]  
 -----

Atomic Coordinates (Angstroms)  
 Type X Y Z  
 -----

|    |           |           |           |
|----|-----------|-----------|-----------|
| C  | 0.217301  | -0.084068 | 0.000007  |
| C  | -1.792176 | -0.629191 | 0.000064  |
| N  | -0.541794 | 1.033936  | 0.000054  |
| H  | -0.255388 | 2.002835  | 0.000105  |
| N  | -1.857101 | 0.694168  | 0.000046  |
| H  | -2.683707 | -1.240715 | 0.000043  |
| Cl | 1.936253  | -0.026379 | -0.000032 |
| N  | -0.533671 | -1.161551 | -0.000104 |

-----

## Statistical Thermodynamic Analysis

Temperature= 298.150 Kelvin Pressure= 1.00000 Atm  
 =====

SCF Energy= -701.840140515 Predicted Change= -7.426978D-07

Zero-point correction (ZPE)= -701.7896 0.05046

Internal Energy (U)= -701.7850 0.05505

Enthalpy (H)= -701.7841 0.05600

Gibbs Free Energy (G)= -701.8182 0.02187  
 -----

Frequencies -- 248.5806 318.4569 500.2056

Supporting Information: **5radical124triazole.out**

-----  
 Using Gaussian 03: IA32L-G03RevC.02 12-Jun-2004  
 =====

# opt nosymm freq ub3lyp/6-31g(d) geom=connectivity  
 #N Geom=AllCheck Guess=Read SCRF=Check GenChk UB3LYP/6-31G(d) Freq  
 -----

Pointgroup= C1 Stoichiometry= C2H2N3(2) C1[X(C2H2N3)] #Atoms= 7  
 Charge = 0 Multiplicity = 2  
 -----

SCF Energy= -241.552729179 Predicted Change= -1.072279D-07  
 =====

Optimization completed. {Found 2 times}  
 Item Max Val. Criteria Pass? RMS Val. Criteria Pass?  
 Force 0.00013 || 0.00045 [ YES ] 0.00005 || 0.00030 [ YES ]  
 Displ 0.00043 || 0.00180 [ YES ] 0.00043 || 0.00180 [ YES ]  
 -----

Atomic Coordinates (Angstroms)  
 Type X Y Z  
 -----

|   |           |           |           |
|---|-----------|-----------|-----------|
| C | 0.202976  | -0.088516 | 0.000027  |
| C | -1.795211 | -0.629451 | -0.000069 |
| N | -0.533151 | 1.035371  | 0.000001  |
| H | -0.250723 | 2.003688  | -0.000007 |
| N | -1.862597 | 0.693039  | 0.000321  |
| H | -2.684508 | -1.244361 | -0.000057 |
| N | -0.523323 | -1.154356 | -0.000001 |

-----

## Statistical Thermodynamic Analysis

Temperature= 298.150 Kelvin Pressure= 1.00000 Atm  
 =====

SCF Energy= -241.552729179 Predicted Change= -1.072279D-07  
 Zero-point correction (ZPE)= -241.5057 0.04700  
 Internal Energy (U)= -241.5021 0.05060  
 Enthalpy (H)= -241.5011 0.05155  
 Gibbs Free Energy (G)= -241.5324 0.02024  
 -----

Frequencies -- 457.4348 637.1000 683.9798

**Chlorobenzofurans**Supporting Information: **2chlorobenzofuran.out**-----  
Using Gaussian 03: IA32L-G03RevC.02 12-Jun-2004  
=====# opt freq nosymm ub3lyp/6-31g(d) geom=connectivity  
#N Geom=AllCheck Guess=Read SCRF=Check GenChk UB3LYP/6-31G(d) Freq  
-----Pointgroup= C1 Stoichiometry= C8H5ClO C1[X(C8H5ClO)] #Atoms= 15  
Charge = 0 Multiplicity = 1  
-----SCF Energy= -843.265351947 Predicted Change= -3.071535D-07  
=====Optimization completed. {Found 1 times}  
Item Max Val. Criteria Pass? RMS Val. Criteria Pass?  
Force 0.00016 || 0.00045 [ YES ] 0.00004 || 0.00030 [ YES ]  
Displ 0.00193 || 0.00180 [ NO ] 0.00193 || 0.00180 [ YES ]  
-----Atomic Coordinates (Angstroms)  
Type X Y Z  
-----

|    |           |           |           |
|----|-----------|-----------|-----------|
| C  | -5.167717 | -0.201099 | -0.812291 |
| C  | -3.760008 | -0.190642 | -0.812379 |
| C  | -3.096646 | 1.045479  | -0.812302 |
| C  | -3.863464 | 2.207649  | -0.812144 |
| C  | -5.269631 | 2.159641  | -0.812062 |
| C  | -5.952664 | 0.943210  | -0.812133 |
| C  | -4.517329 | -2.283589 | -0.812588 |
| C  | -3.359316 | -1.577895 | -0.812538 |
| H  | -2.011550 | 1.094863  | -0.812361 |
| H  | -3.367138 | 3.174040  | -0.812081 |
| H  | -5.836034 | 3.086380  | -0.811938 |
| H  | -7.035992 | 0.886710  | -0.812067 |
| H  | -2.360209 | -1.987796 | -0.812637 |
| O  | -5.634204 | -1.496441 | -0.812369 |
| Cl | -4.804897 | -3.975745 | -0.812787 |

-----  
Statistical Thermodynamic AnalysisTemperature= 298.150 Kelvin Pressure= 1.00000 Atm  
=====SCF Energy= -843.265351947 Predicted Change= -3.071535D-07  
Zero-point correction (ZPE)= -843.1573 0.10800  
Internal Energy (U)= -843.1501 0.11518  
Enthalpy (H)= -843.1492 0.11612  
Gibbs Free Energy (G)= -843.1896 0.07565  
-----

Frequencies -- 113.5713 218.4535 251.2277

Supporting Information: **2radicalbenzofuran.out**

-----  
 Using Gaussian 03: AM64L-G03RevC.02 12-Jun-2004  
 =====

# opt freq nosymm ub3lyp/6-31g(d) geom=connectivity  
 #N Geom=AllCheck Guess=Read SCRF=Check GenChk UB3LYP/6-31G(d) Freq  
 -----

Pointgroup= C1 Stoichiometry= C8H5O(2) C1[X(C8H5O)] #Atoms= 14  
 Charge = 0 Multiplicity = 2  
 -----

SCF Energy= -382.975054744 Predicted Change= -1.159071D-06  
 =====

Optimization completed. {Found 2 times}  
 Item Max Val. Criteria Pass? RMS Val. Criteria Pass?  
 Force 0.00040 || 0.00045 [ YES ] 0.00008 || 0.00030 [ YES ]  
 Displ 0.00118 || 0.00180 [ YES ] 0.00118 || 0.00180 [ YES ]  
 -----

Atomic Coordinates (Angstroms)  
 Type X Y Z  
 -----

|   |           |           |           |
|---|-----------|-----------|-----------|
| C | -5.169936 | -0.197475 | -0.812294 |
| C | -3.761299 | -0.191526 | -0.812383 |
| C | -3.097837 | 1.044073  | -0.812304 |
| C | -3.865093 | 2.206939  | -0.812141 |
| C | -5.271061 | 2.161527  | -0.812057 |
| C | -5.955296 | 0.945288  | -0.812133 |
| C | -4.522214 | -2.261096 | -0.812541 |
| C | -3.350466 | -1.588206 | -0.812544 |
| H | -2.012776 | 1.093795  | -0.812367 |
| H | -3.367369 | 3.172717  | -0.812077 |
| H | -5.836067 | 3.089082  | -0.811931 |
| H | -7.038663 | 0.888375  | -0.812072 |
| H | -2.351118 | -1.995290 | -0.812646 |
| O | -5.632708 | -1.507691 | -0.812398 |

## Statistical Thermodynamic Analysis

Temperature= 298.150 Kelvin Pressure= 1.00000 Atm  
 =====

SCF Energy= -382.975054744 Predicted Change= -1.159071D-06  
 Zero-point correction (ZPE)= -382.8703 0.10469  
 Internal Energy (U)= -382.8644 0.11065  
 Enthalpy (H)= -382.8634 0.11159  
 Gibbs Free Energy (G)= -382.9011 0.07392  
 -----

Frequencies -- 223.7730 252.4734 411.1021

Supporting Information: **3chlorobenzofuran.out**

-----  
 Using Gaussian 03: IA32L-G03RevC.02 12-Jun-2004  
 =====

# opt freq nosymm ub3lyp/6-31g(d) geom=connectivity  
 #N Geom=AllCheck Guess=Read SCRF=Check GenChk UB3LYP/6-31G(d) Freq  
 -----

Pointgroup= C1 Stoichiometry= C8H5ClO C1[X(C8H5ClO)] #Atoms= 15  
 Charge = 0 Multiplicity = 1  
 -----

SCF Energy= -843.264890254 Predicted Change= -2.327895D-07  
 =====

Optimization completed. {Found 2 times}  
 Item Max Val. Criteria Pass? RMS Val. Criteria Pass?  
 Force 0.00015 || 0.00045 [ YES ] 0.00004 || 0.00030 [ YES ]  
 Displ 0.00120 || 0.00180 [ YES ] 0.00120 || 0.00180 [ YES ]  
 -----

Atomic Coordinates (Angstroms)  
 Type X Y Z  
 -----

|    |           |           |           |
|----|-----------|-----------|-----------|
| C  | -5.173039 | -0.197416 | -0.812282 |
| C  | -3.766494 | -0.179807 | -0.812350 |
| C  | -3.093325 | 1.048964  | -0.812278 |
| C  | -3.856216 | 2.212414  | -0.812146 |
| C  | -5.263771 | 2.166701  | -0.812084 |
| C  | -5.951053 | 0.954021  | -0.812150 |
| C  | -4.535541 | -2.298766 | -0.812573 |
| C  | -3.390056 | -1.571299 | -0.812483 |
| H  | -2.008241 | 1.086218  | -0.812322 |
| H  | -3.357946 | 3.177641  | -0.812085 |
| H  | -5.826896 | 3.095484  | -0.811977 |
| H  | -7.034726 | 0.902182  | -0.812094 |
| H  | -4.723710 | -3.361158 | -0.812708 |
| O  | -5.640748 | -1.486967 | -0.812331 |
| Cl | -1.774498 | -2.197577 | -0.812608 |

## Statistical Thermodynamic Analysis

Temperature= 298.150 Kelvin Pressure= 1.00000 Atm  
 =====

SCF Energy= -843.264890254 Predicted Change= -2.327895D-07  
 Zero-point correction (ZPE)= -843.1566 0.10823  
 Internal Energy (U)= -843.1494 0.11542  
 Enthalpy (H)= -843.1485 0.11637  
 Gibbs Free Energy (G)= -843.1890 0.07583  
 -----

Frequencies -- 138.7812 175.2822 227.6539



Supporting Information: **3radicalbenzofuran.out**

-----  
 Using Gaussian 03: AM64L-G03RevC.02 12-Jun-2004  
 =====

# opt freq nosymm ub3lyp/6-31g(d) geom=connectivity  
 #N Geom=AllCheck Guess=Read SCRF=Check GenChk UB3LYP/6-31G(d) Freq  
 -----

Pointgroup= C1 Stoichiometry= C8H5O(2) C1[X(C8H5O)] #Atoms= 14  
 Charge = 0 Multiplicity = 2  
 -----

SCF Energy= -382.974471333 Predicted Change= -7.738949D-07  
 =====

Optimization completed. {Found 2 times}  
 Item Max Val. Criteria Pass? RMS Val. Criteria Pass?  
 Force 0.00031 || 0.00045 [ YES ] 0.00007 || 0.00030 [ YES ]  
 Displ 0.00096 || 0.00180 [ YES ] 0.00096 || 0.00180 [ YES ]  
 -----

Atomic Coordinates (Angstroms)  
 Type X Y Z  
 -----

|   |           |           |           |
|---|-----------|-----------|-----------|
| C | -5.167676 | -0.200769 | -0.812305 |
| C | -3.752845 | -0.179270 | -0.812376 |
| C | -3.089224 | 1.056259  | -0.812286 |
| C | -3.855496 | 2.217082  | -0.812128 |
| C | -5.262741 | 2.167194  | -0.812061 |
| C | -5.944398 | 0.951674  | -0.812150 |
| C | -4.532884 | -2.312017 | -0.812507 |
| C | -3.410823 | -1.568971 | -0.812537 |
| H | -2.004420 | 1.100861  | -0.812341 |
| H | -3.360219 | 3.183909  | -0.812059 |
| H | -5.829195 | 3.093964  | -0.811947 |
| H | -7.028365 | 0.896043  | -0.812111 |
| H | -4.736398 | -3.371012 | -0.812611 |
| O | -5.647081 | -1.486734 | -0.812445 |

## Statistical Thermodynamic Analysis

Temperature= 298.150 Kelvin Pressure= 1.00000 Atm  
 =====

SCF Energy= -382.974471333 Predicted Change= -7.738949D-07  
 Zero-point correction (ZPE)= -382.8694 0.10503  
 Internal Energy (U)= -382.8635 0.11096  
 Enthalpy (H)= -382.8625 0.11190  
 Gibbs Free Energy (G)= -382.9001 0.07429  
 -----

Frequencies -- 219.4298 256.3079 417.6671

Supporting Information: **4chlorobenzofuran.out**

-----  
 Using Gaussian 03: AM64L-G03RevC.02 12-Jun-2004  
 =====

# opt freq nosymm ub3lyp/6-31g(d) geom=connectivity  
 #N Geom=AllCheck Guess=Read SCRF=Check GenChk UB3LYP/6-31G(d) Freq  
 -----

Pointgroup= C1 Stoichiometry= C8H5ClO C1[X(C8H5ClO)] #Atoms= 15  
 Charge = 0 Multiplicity = 1  
 -----

SCF Energy= -843.269425941 Predicted Change= -3.551721D-07  
 =====

Optimization completed. {Found 2 times}  
 Item Max Val. Criteria Pass? RMS Val. Criteria Pass?  
 Force 0.00017 || 0.00045 [ YES ] 0.00004 || 0.00030 [ YES ]  
 Displ 0.00166 || 0.00180 [ YES ] 0.00166 || 0.00180 [ YES ]  
 -----

Atomic Coordinates (Angstroms)  
 Type X Y Z  
 -----

|    |           |           |           |
|----|-----------|-----------|-----------|
| C  | -5.179308 | -0.195502 | -0.812285 |
| C  | -3.770125 | -0.199634 | -0.812397 |
| C  | -3.115301 | 1.038623  | -0.812329 |
| C  | -3.856804 | 2.214061  | -0.812162 |
| C  | -5.262728 | 2.166971  | -0.812058 |
| C  | -5.954805 | 0.957485  | -0.812116 |
| C  | -4.539379 | -2.292454 | -0.812597 |
| C  | -3.381892 | -1.587106 | -0.812560 |
| H  | -3.343304 | 3.169531  | -0.812109 |
| H  | -5.817545 | 3.100436  | -0.811926 |
| H  | -7.038252 | 0.910792  | -0.812032 |
| H  | -4.750443 | -3.351443 | -0.812725 |
| O  | -5.647686 | -1.481039 | -0.812349 |
| H  | -2.378486 | -1.986482 | -0.812674 |
| Cl | -1.359476 | 1.097022  | -0.812456 |

## Statistical Thermodynamic Analysis

Temperature= 298.150 Kelvin Pressure= 1.00000 Atm  
 =====

SCF Energy= -843.269425941 Predicted Change= -3.551721D-07  
 Zero-point correction (ZPE)= -843.1613 0.10808  
 Internal Energy (U)= -843.1541 0.11526  
 Enthalpy (H)= -843.1532 0.11620  
 Gibbs Free Energy (G)= -843.1936 0.07576  
 -----

Frequencies -- 155.2522 205.0585 222.8499

Supporting Information: **4radicalbenzofuran.out**

-----  
 Using Gaussian 03: AM64L-G03RevC.02 12-Jun-2004  
 =====

# opt freq nosymm ub3lyp/6-31g(d) geom=connectivity  
 #N Geom=AllCheck Guess=Read SCRF=Check GenChk UB3LYP/6-31G(d) Freq  
 -----

Pointgroup= C1 Stoichiometry= C8H5O(2) C1[X(C8H5O)] #Atoms= 14  
 Charge = 0 Multiplicity = 2  
 -----

SCF Energy= -382.984931868 Predicted Change= -4.340770D-07  
 =====

Optimization completed. {Found 2 times}  
 Item Max Val. Criteria Pass? RMS Val. Criteria Pass?  
 Force 0.00023 || 0.00045 [ YES ] 0.00006 || 0.00030 [ YES ]  
 Displ 0.00155 || 0.00180 [ YES ] 0.00155 || 0.00180 [ YES ]  
 -----

Atomic Coordinates (Angstroms)  
 Type X Y Z  
 -----

|   |           |           |           |
|---|-----------|-----------|-----------|
| C | -5.174842 | -0.198875 | -0.812315 |
| C | -3.759027 | -0.204902 | -0.812401 |
| C | -3.156441 | 1.042050  | -0.812301 |
| C | -3.847861 | 2.228378  | -0.812122 |
| C | -5.263385 | 2.175894  | -0.812047 |
| C | -5.945262 | 0.960412  | -0.812143 |
| C | -4.538519 | -2.298984 | -0.812512 |
| C | -3.378909 | -1.597957 | -0.812635 |
| H | -3.339603 | 3.188646  | -0.812055 |
| H | -5.826979 | 3.105226  | -0.811916 |
| H | -7.028897 | 0.911216  | -0.812087 |
| H | -4.752796 | -3.357361 | -0.812567 |
| O | -5.645463 | -1.484333 | -0.812424 |
| H | -2.378074 | -2.005171 | -0.812796 |

## Statistical Thermodynamic Analysis

Temperature= 298.150 Kelvin Pressure= 1.00000 Atm  
 =====

SCF Energy= -382.984931868 Predicted Change= -4.340770D-07  
 Zero-point correction (ZPE)= -382.8801 0.10475  
 Internal Energy (U)= -382.8742 0.11068  
 Enthalpy (H)= -382.8733 0.11162  
 Gibbs Free Energy (G)= -382.9109 0.07401  
 -----

Frequencies -- 212.6405 253.8622 410.0782

Supporting Information: **5chlorobenzofuran.out**

-----  
 Using Gaussian 03: IA32L-G03RevC.02 12-Jun-2004  
 =====

# opt freq nosymm ub3lyp/6-31g(d) geom=connectivity  
 #N Geom=AllCheck Guess=Read SCRF=Check GenChk UB3LYP/6-31G(d) Freq  
 -----

Pointgroup= C1 Stoichiometry= C8H5ClO C1[X(C8H5ClO)] #Atoms= 15  
 Charge = 0 Multiplicity = 1  
 -----

SCF Energy= -843.268684585 Predicted Change= -2.903001D-08  
 =====

Optimization completed. {Found 2 times}  
 Item Max Val. Criteria Pass? RMS Val. Criteria Pass?  
 Force 0.00002 || 0.00045 [ YES ] 0.00000 || 0.00030 [ YES ]  
 Displ 0.00045 || 0.00180 [ YES ] 0.00045 || 0.00180 [ YES ]  
 -----

Atomic Coordinates (Angstroms)  
 Type X Y Z  
 -----

|    |           |           |           |
|----|-----------|-----------|-----------|
| C  | -5.177630 | -0.198232 | -0.812344 |
| C  | -3.769820 | -0.193207 | -0.812425 |
| C  | -3.090995 | 1.034320  | -0.812312 |
| C  | -3.859736 | 2.192016  | -0.812116 |
| C  | -5.265798 | 2.170629  | -0.812034 |
| C  | -5.949335 | 0.956756  | -0.812152 |
| C  | -4.538433 | -2.291890 | -0.812428 |
| C  | -3.382421 | -1.583597 | -0.812640 |
| H  | -2.007889 | 1.088382  | -0.812376 |
| H  | -5.812676 | 3.106763  | -0.811897 |
| H  | -7.033277 | 0.914855  | -0.812119 |
| H  | -4.746985 | -3.351466 | -0.812397 |
| H  | -2.380702 | -1.989764 | -0.812766 |
| O  | -5.648128 | -1.483571 | -0.812565 |
| Cl | -3.045663 | 3.755961  | -0.811982 |

## Statistical Thermodynamic Analysis

Temperature= 298.150 Kelvin Pressure= 1.00000 Atm  
 =====

SCF Energy= -843.268684585 Predicted Change= -2.903001D-08  
 Zero-point correction (ZPE)= -843.1606 0.10800  
 Internal Energy (U)= -843.1535 0.11518  
 Enthalpy (H)= -843.1525 0.11612  
 Gibbs Free Energy (G)= -843.1930 0.07567  
 -----

Frequencies -- 124.3511 233.5373 240.7524

Supporting Information: **5radicalbenzofuran.out**

Using Gaussian 03: AM64L-G03RevC.02 12-Jun-2004

# opt freq nosymm ub3lyp/6-31g(d) geom=connectivity  
#N Geom=AllCheck Guess=Read SCRF=Check GenChk UB3LYP/6-31G(d) Freq

Pointgroup= C1 Stoichiometry= C8H5O(2) C1[X(C8H5O)] #Atoms= 14  
Charge = 0 Multiplicity = 2

SCF Energy= -382.985198679 Predicted Change= -3.854082D-07

Optimization completed. {Found 2 times}  
Item Max Val. Criteria Pass? RMS Val. Criteria Pass?  
Force 0.00020 || 0.00045 [ YES ] 0.00005 || 0.00030 [ YES ]  
Displ 0.00099 || 0.00180 [ YES ] 0.00099 || 0.00180 [ YES ]

Atomic Coordinates (Angstroms)  
Type X Y Z

|   |           |           |           |
|---|-----------|-----------|-----------|
| C | -5.171059 | -0.191092 | -0.812245 |
| C | -3.760390 | -0.194520 | -0.812409 |
| C | -3.076720 | 1.040923  | -0.812430 |
| C | -3.881959 | 2.153198  | -0.812264 |
| C | -5.270304 | 2.183495  | -0.812104 |
| C | -5.952895 | 0.959896  | -0.812090 |
| C | -4.540246 | -2.289958 | -0.812714 |
| C | -3.380603 | -1.587163 | -0.812375 |
| H | -1.991600 | 1.095797  | -0.812487 |
| H | -5.821049 | 3.119729  | -0.811960 |
| H | -7.037208 | 0.906214  | -0.811955 |
| H | -4.753405 | -3.348764 | -0.812926 |
| H | -2.380884 | -1.998516 | -0.812357 |
| O | -5.645503 | -1.477245 | -0.812254 |

## Statistical Thermodynamic Analysis

Temperature= 298.150 Kelvin Pressure= 1.00000 Atm

SCF Energy= -382.985198679 Predicted Change= -3.854082D-07  
Zero-point correction (ZPE)= -382.8806 0.10459  
Internal Energy (U)= -382.8746 0.11053  
Enthalpy (H)= -382.8737 0.11148  
Gibbs Free Energy (G)= -382.9113 0.07387

Frequencies -- 222.3695 264.9698 410.0054

Supporting Information: **6radicalbenzofuran.out**

Using Gaussian 03: AM64L-G03RevC.02 12-Jun-2004

# opt freq nosymm ub3lyp/6-31g(d) geom=connectivity  
#N Geom=AllCheck Guess=Read SCRF=Check GenChk UB3LYP/6-31G(d) Freq

Pointgroup= C1 Stoichiometry= C8H5O(2) C1[X(C8H5O)] #Atoms= 14  
Charge = 0 Multiplicity = 2

SCF Energy= -382.985218969 Predicted Change= -3.873275D-07

Optimization completed. {Found 2 times}  
Item Max Val. Criteria Pass? RMS Val. Criteria Pass?  
Force 0.00016 || 0.00045 [ YES ] 0.00005 || 0.00030 [ YES ]  
Displ 0.00080 || 0.00180 [ YES ] 0.00080 || 0.00180 [ YES ]

Atomic Coordinates (Angstroms)  
Type X Y Z

|   |           |           |           |
|---|-----------|-----------|-----------|
| C | -5.186648 | -0.198299 | -0.812266 |
| C | -3.775685 | -0.187621 | -0.812401 |
| C | -3.095918 | 1.041048  | -0.812365 |
| C | -3.843901 | 2.223639  | -0.812190 |
| C | -5.227767 | 2.116198  | -0.812057 |
| C | -5.971014 | 0.958937  | -0.812085 |
| C | -4.539355 | -2.291819 | -0.812687 |
| C | -3.387391 | -1.579075 | -0.812462 |
| H | -2.009408 | 1.077705  | -0.812437 |
| H | -3.348650 | 3.190487  | -0.812127 |
| H | -7.055971 | 0.926284  | -0.811975 |
| H | -4.745837 | -3.351738 | -0.812875 |
| O | -5.653087 | -1.484749 | -0.812337 |
| H | -2.384601 | -1.983163 | -0.812496 |

## Statistical Thermodynamic Analysis

Temperature= 298.150 Kelvin Pressure= 1.00000 Atm

SCF Energy= -382.985218969 Predicted Change= -3.873275D-07  
Zero-point correction (ZPE)= -382.8806 0.10454  
Internal Energy (U)= -382.8747 0.11049  
Enthalpy (H)= -382.8737 0.11143  
Gibbs Free Energy (G)= -382.9114 0.07381

Frequencies -- 225.8848 257.8600 411.2915

Supporting Information: **7chlorobenzofuran.out**

-----  
 Using Gaussian 03: IA32L-G03RevC.02 12-Jun-2004  
 =====

# opt freq nosymm ub3lyp/6-31g(d) geom=connectivity  
 #N Geom=AllCheck Guess=Read SCRF=Check GenChk UB3LYP/6-31G(d) Freq  
 -----

Pointgroup= C1 Stoichiometry= C8H5ClO C1[X(C8H5ClO)] #Atoms= 15  
 Charge = 0 Multiplicity = 1  
 -----

SCF Energy= -843.266363719 Predicted Change= -3.005008D-07  
 =====

Optimization completed. {Found 2 times}  
 Item Max Val. Criteria Pass? RMS Val. Criteria Pass?  
 Force 0.00018 || 0.00045 [ YES ] 0.00004 || 0.00030 [ YES ]  
 Displ 0.00173 || 0.00180 [ YES ] 0.00173 || 0.00180 [ YES ]  
 -----

Atomic Coordinates (Angstroms)  
 Type X Y Z  
 -----

|    |           |           |           |
|----|-----------|-----------|-----------|
| C  | -5.182719 | -0.201746 | -0.812277 |
| C  | -3.773667 | -0.189535 | -0.812393 |
| C  | -3.097526 | 1.039339  | -0.812329 |
| C  | -3.852526 | 2.207819  | -0.812155 |
| C  | -5.258824 | 2.179293  | -0.812044 |
| C  | -5.940575 | 0.965472  | -0.812104 |
| C  | -4.544512 | -2.291030 | -0.812587 |
| C  | -3.389734 | -1.582217 | -0.812562 |
| H  | -2.012340 | 1.078592  | -0.812411 |
| H  | -3.351917 | 3.171747  | -0.812100 |
| H  | -5.826775 | 3.103552  | -0.811906 |
| H  | -4.756407 | -3.349769 | -0.812710 |
| O  | -5.654354 | -1.480757 | -0.812344 |
| H  | -2.387734 | -1.987753 | -0.812682 |
| Cl | -7.687974 | 0.898359  | -0.811961 |

## Statistical Thermodynamic Analysis

Temperature= 298.150 Kelvin Pressure= 1.00000 Atm  
 =====

SCF Energy= -843.266363719 Predicted Change= -3.005008D-07  
 Zero-point correction (ZPE)= -843.1582 0.10810  
 Internal Energy (U)= -843.1510 0.11528  
 Enthalpy (H)= -843.1501 0.11623  
 Gibbs Free Energy (G)= -843.1905 0.07577  
 -----

Frequencies -- 150.6085 197.1316 218.5592

Supporting Information: **7radicalbenzofuran.out**

-----  
 Using Gaussian 03: AM64L-G03RevC.02 12-Jun-2004  
 =====

# opt freq nosymm ub3lyp/6-31g(d) geom=connectivity  
 #N Geom=AllCheck Guess=Read SCRF=Check GenChk UB3LYP/6-31G(d) Freq  
 -----

Pointgroup= C1 Stoichiometry= C8H5O(2) C1[X(C8H5O)] #Atoms= 14  
 Charge = 0 Multiplicity = 2  
 -----

SCF Energy= -382.982408947 Predicted Change= -2.058169D-07  
 =====

Optimization completed. {Found 2 times}  
 Item Max Val. Criteria Pass? RMS Val. Criteria Pass?  
 Force 0.00016 || 0.00045 [ YES ] 0.00004 || 0.00030 [ YES ]  
 Displ 0.00070 || 0.00180 [ YES ] 0.00070 || 0.00180 [ YES ]  
 -----

Atomic Coordinates (Angstroms)  
 Type X Y Z  
 -----

|   |           |           |           |
|---|-----------|-----------|-----------|
| C | -5.191731 | -0.210007 | -0.812308 |
| C | -3.776524 | -0.193834 | -0.812404 |
| C | -3.107034 | 1.041330  | -0.812310 |
| C | -3.853127 | 2.215605  | -0.812128 |
| C | -5.269951 | 2.191204  | -0.812037 |
| C | -5.898429 | 0.969439  | -0.812133 |
| C | -4.544864 | -2.298250 | -0.812522 |
| C | -3.391573 | -1.585985 | -0.812620 |
| H | -2.021508 | 1.080176  | -0.812391 |
| H | -3.345755 | 3.176853  | -0.812065 |
| H | -5.831808 | 3.121283  | -0.811907 |
| H | -4.749655 | -3.358554 | -0.812586 |
| O | -5.658901 | -1.495662 | -0.812428 |
| H | -2.388751 | -1.990591 | -0.812766 |

## Statistical Thermodynamic Analysis

Temperature= 298.150 Kelvin Pressure= 1.00000 Atm  
 =====

SCF Energy= -382.982408947 Predicted Change= -2.058169D-07  
 Zero-point correction (ZPE)= -382.8777 0.10470  
 Internal Energy (U)= -382.8717 0.11064  
 Enthalpy (H)= -382.8708 0.11159  
 Gibbs Free Energy (G)= -382.9084 0.07395  
 -----

Frequencies -- 212.5453 255.0791 410.6018



**Chlorobenzothiazoles**Supporting Information: **2chlorobenzothiazole2.out**-----  
Using Gaussian 03: AM64L-G03RevC.02 12-Jun-2004  
=====# opt freq nosymm ub3lyp/6-31g(d) geom=connectivity  
#N Geom=AllCheck Guess=Read SCRF=Check GenChk UB3LYP/6-31G(d) Freq  
-----Pointgroup= C1 Stoichiometry= C7H4ClNS C1[X(C7H4ClNS)] #Atoms= 14  
Charge = 0 Multiplicity = 1  
-----SCF Energy= -1182.29201379 Predicted Change= -4.642312D-07  
=====Optimization completed. {Found 2 times}  
Item Max Val. Criteria Pass? RMS Val. Criteria Pass?  
Force 0.00027 || 0.00045 [ YES ] 0.00005 || 0.00030 [ YES ]  
Displ 0.00106 || 0.00180 [ YES ] 0.00106 || 0.00180 [ YES ]  
-----Atomic Coordinates (Angstroms)  
Type X Y Z  
-----

|    |           |           |           |
|----|-----------|-----------|-----------|
| C  | -5.360637 | -0.129482 | -0.812294 |
| C  | -3.947171 | -0.221457 | -0.812436 |
| C  | -3.176048 | 0.948385  | -0.812366 |
| C  | -3.823390 | 2.178488  | -0.812156 |
| C  | -5.226255 | 2.256491  | -0.812015 |
| C  | -6.011065 | 1.105479  | -0.812083 |
| C  | -4.385046 | -2.368263 | -0.812655 |
| H  | -2.093641 | 0.871495  | -0.812475 |
| H  | -3.237302 | 3.092876  | -0.812100 |
| H  | -5.709978 | 3.229071  | -0.811850 |
| H  | -7.094638 | 1.171200  | -0.811972 |
| S  | -6.044971 | -1.749937 | -0.812427 |
| Cl | -4.132964 | -4.081631 | -0.812885 |
| N  | -3.430020 | -1.512511 | -0.812641 |

-----  
Statistical Thermodynamic AnalysisTemperature= 298.150 Kelvin Pressure= 1.00000 Atm  
=====SCF Energy= -1182.29201379 Predicted Change= -4.642312D-07  
Zero-point correction (ZPE)= -1182.1988 0.09318  
Internal Energy (U)= -1182.1912 0.10074  
Enthalpy (H)= -1182.1903 0.10169  
Gibbs Free Energy (G)= -1182.2319 0.06008  
-----

Frequencies -- 108.5959 195.7178 208.9368

Supporting Information: **2radicalbenzothiazole.out**

-----  
 Using Gaussian 03: IA32L-G03RevC.02 12-Jun-2004  
 =====

# opt freq nosymm ub3lyp/6-31g(d) geom=connectivity  
 #N Geom=AllCheck Guess=Read SCRF=Check GenChk UB3LYP/6-31G(d) Freq  
 -----

Pointgroup= C1 Stoichiometry= C7H4NS(2) C1[X(C7H4NS)] #Atoms= 13  
 Charge = 0 Multiplicity = 2  
 -----

SCF Energy= -722.015613541 Predicted Change= -7.463634D-07  
 =====

Optimization completed. {Found 2 times}  
 Item Max Val. Criteria Pass? RMS Val. Criteria Pass?  
 Force 0.00036 || 0.00045 [ YES ] 0.00006 || 0.00030 [ YES ]  
 Displ 0.00118 || 0.00180 [ YES ] 0.00118 || 0.00180 [ YES ]  
 -----

Atomic Coordinates (Angstroms)  
 Type X Y Z  
 -----

|   |           |           |           |
|---|-----------|-----------|-----------|
| C | -5.357643 | -0.127561 | -0.812294 |
| C | -3.944345 | -0.211574 | -0.812436 |
| C | -3.171150 | 0.953177  | -0.812366 |
| C | -3.822383 | 2.182885  | -0.812155 |
| C | -5.224856 | 2.258354  | -0.812015 |
| C | -6.009061 | 1.105639  | -0.812082 |
| C | -4.383490 | -2.369756 | -0.812656 |
| H | -2.088527 | 0.878890  | -0.812475 |
| H | -3.238262 | 3.098566  | -0.812098 |
| H | -5.709421 | 3.230582  | -0.811851 |
| H | -7.092906 | 1.170767  | -0.811973 |
| S | -6.041520 | -1.768905 | -0.812428 |
| N | -3.456597 | -1.529227 | -0.812641 |

## Statistical Thermodynamic Analysis

Temperature= 298.150 Kelvin Pressure= 1.00000 Atm  
 =====

SCF Energy= -722.015613541 Predicted Change= -7.463634D-07  
 Zero-point correction (ZPE)= -721.9255 0.09006  
 Internal Energy (U)= -721.9191 0.09643  
 Enthalpy (H)= -721.9182 0.09737  
 Gibbs Free Energy (G)= -721.9571 0.05846  
 -----

Frequencies -- 193.1488 217.6680 349.7472

Supporting Information: **4chlorobenzothiazole2.out**

-----  
 Using Gaussian 03: AM64L-G03RevC.02 12-Jun-2004  
 =====

# opt freq nosymm ub3lyp/6-31g(d) geom=connectivity  
 #N Geom=AllCheck Guess=Read SCRF=Check GenChk UB3LYP/6-31G(d) Freq  
 -----

Pointgroup= C1 Stoichiometry= C7H4CINS C1[X(C7H4CINS)] #Atoms= 14  
 Charge = 0 Multiplicity = 1  
 -----

SCF Energy= -1182.29215070 Predicted Change= -5.893547D-07  
 =====

Optimization completed. {Found 2 times}  
 Item Max Val. Criteria Pass? RMS Val. Criteria Pass?  
 Force 0.00024 || 0.00045 [ YES ] 0.00005 || 0.00030 [ YES ]  
 Displ 0.00111 || 0.00180 [ YES ] 0.00111 || 0.00180 [ YES ]  
 -----

Atomic Coordinates (Angstroms)  
 Type X Y Z  
 -----

|    |           |           |           |
|----|-----------|-----------|-----------|
| C  | -5.341504 | -0.130696 | -0.812288 |
| C  | -3.926179 | -0.220039 | -0.812439 |
| C  | -3.181054 | 0.973179  | -0.812376 |
| C  | -3.835737 | 2.198073  | -0.812168 |
| C  | -5.238804 | 2.253633  | -0.812021 |
| C  | -6.009574 | 1.095757  | -0.812078 |
| C  | -4.359805 | -2.374089 | -0.812657 |
| H  | -3.251837 | 3.112108  | -0.812115 |
| H  | -5.727791 | 3.223348  | -0.811856 |
| H  | -7.093453 | 1.147032  | -0.811965 |
| S  | -6.011760 | -1.751790 | -0.812422 |
| N  | -3.407139 | -1.503043 | -0.812606 |
| H  | -4.192589 | -3.445783 | -0.812804 |
| Cl | -1.434949 | 0.912461  | -0.812534 |

## Statistical Thermodynamic Analysis

Temperature= 298.150 Kelvin Pressure= 1.00000 Atm  
 =====

SCF Energy= -1182.29215070 Predicted Change= -5.893547D-07  
 Zero-point correction (ZPE)= -1182.1989 0.09318  
 Internal Energy (U)= -1182.1914 0.10071  
 Enthalpy (H)= -1182.1904 0.10165  
 Gibbs Free Energy (G)= -1182.2320 0.06012  
 -----

Frequencies -- 128.2568 200.8712 205.4153

Supporting Information: **4radicalbenzothiazole.out**

-----  
 Using Gaussian 03: IA32L-G03RevC.02 12-Jun-2004  
 =====

# opt freq nosymm ub3lyp/6-31g(d) geom=connectivity  
 #N Geom=AllCheck Guess=Read SCRF=Check GenChk UB3LYP/6-31G(d) Freq  
 -----

Pointgroup= C1 Stoichiometry= C7H4NS(2) C1[X(C7H4NS)] #Atoms= 13  
 Charge = 0 Multiplicity = 2  
 -----

SCF Energy= -722.009203812 Predicted Change= -3.865265D-07  
 =====

Optimization completed. {Found 2 times}  
 Item Max Val. Criteria Pass? RMS Val. Criteria Pass?  
 Force 0.00035 || 0.00045 [ YES ] 0.00006 || 0.00030 [ YES ]  
 Displ 0.00103 || 0.00180 [ YES ] 0.00103 || 0.00180 [ YES ]  
 -----

Atomic Coordinates (Angstroms)  
 Type X Y Z  
 -----

|   |           |           |           |
|---|-----------|-----------|-----------|
| C | -5.339739 | -0.135250 | -0.812301 |
| C | -3.918241 | -0.229460 | -0.812461 |
| C | -3.231680 | 0.976079  | -0.812385 |
| C | -3.824819 | 2.210935  | -0.812163 |
| C | -5.238379 | 2.263455  | -0.811999 |
| C | -5.999901 | 1.098386  | -0.812072 |
| C | -4.356721 | -2.383285 | -0.812598 |
| H | -3.241557 | 3.127651  | -0.812114 |
| H | -5.735709 | 3.229940  | -0.811829 |
| H | -7.084062 | 1.149699  | -0.811966 |
| S | -6.010894 | -1.757157 | -0.812496 |
| N | -3.400020 | -1.517308 | -0.812667 |
| H | -4.195505 | -3.455995 | -0.812744 |

## Statistical Thermodynamic Analysis

Temperature= 298.150 Kelvin Pressure= 1.00000 Atm  
 =====

SCF Energy= -722.009203812 Predicted Change= -3.865265D-07  
 Zero-point correction (ZPE)= -721.9194 0.08980  
 Internal Energy (U)= -721.9131 0.09608  
 Enthalpy (H)= -721.9121 0.09702  
 Gibbs Free Energy (G)= -721.9509 0.05825  
 -----

Frequencies -- 195.2415 208.8934 354.2365

Supporting Information: **5chlorobenzothiazole.out**

-----  
 Using Gaussian 03: AM64L-G03RevC.02 12-Jun-2004  
 =====

# opt freq ub3lyp/6-31g(d) geom=connectivity  
 #N Geom=AllCheck Guess=Read SCRF=Check GenChk UB3LYP/6-31G(d) Freq  
 -----

Pointgroup= C1 Stoichiometry= C7H4CINS C1[X(C7H4CINS)] #Atoms= 14  
 Charge = 0 Multiplicity = 1  
 -----

SCF Energy= -1182.29421188 Predicted Change= -8.531035D-07  
 =====

Optimization completed. {Found 2 times}  
 Item Max Val. Criteria Pass? RMS Val. Criteria Pass?  
 Force 0.00031 || 0.00045 [ YES ] 0.00006 || 0.00030 [ YES ]  
 Displ 0.00168 || 0.00180 [ YES ] 0.00168 || 0.00180 [ YES ]  
 -----

Atomic Coordinates (Angstroms)  
 Type X Y Z  
 -----

|    |           |           |           |
|----|-----------|-----------|-----------|
| C  | 0.982451  | 0.623484  | -0.000006 |
| C  | 0.551901  | -0.725721 | 0.000131  |
| C  | -0.818064 | -1.025059 | 0.000066  |
| C  | -1.716322 | 0.031721  | -0.000135 |
| C  | -1.293897 | 1.371571  | -0.000277 |
| C  | 0.063407  | 1.675583  | -0.000212 |
| C  | 2.719697  | -1.099152 | 0.000342  |
| H  | -1.150469 | -2.056458 | 0.000177  |
| H  | -2.032343 | 2.165692  | -0.000441 |
| H  | 0.389629  | 2.710695  | -0.000328 |
| S  | 2.735072  | 0.667754  | 0.000121  |
| N  | 1.564372  | -1.675431 | 0.000337  |
| H  | 3.660444  | -1.639241 | 0.000480  |
| Cl | -3.442003 | -0.308899 | -0.000215 |

## Statistical Thermodynamic Analysis

Temperature= 298.150 Kelvin Pressure= 1.00000 Atm  
 =====

SCF Energy= -1182.29421188 Predicted Change= -8.531035D-07  
 Zero-point correction (ZPE)= -1182.2011 0.09310  
 Internal Energy (U)= -1182.1935 0.10063  
 Enthalpy (H)= -1182.1926 0.10158  
 Gibbs Free Energy (G)= -1182.2342 0.05999  
 -----

Frequencies -- 106.8017 211.1393 226.5540

Supporting Information: **5radicalbenzothiazole.out**

-----  
 Using Gaussian 03: IA32L-G03RevC.02 12-Jun-2004  
 =====

# opt freq nosymm ub3lyp/6-31g(d) geom=connectivity  
 #N Geom=AllCheck Guess=Read SCRF=Check GenChk UB3LYP/6-31G(d) Freq  
 -----

Pointgroup= C1 Stoichiometry= C7H4NS(2) C1[X(C7H4NS)] #Atoms= 13  
 Charge = 0 Multiplicity = 2  
 -----

SCF Energy= -722.011280519 Predicted Change= -2.342516D-07  
 =====

Optimization completed. {Found 2 times}  
 Item Max Val. Criteria Pass? RMS Val. Criteria Pass?  
 Force 0.00016 || 0.00045 [ YES ] 0.00004 || 0.00030 [ YES ]  
 Displ 0.00062 || 0.00180 [ YES ] 0.00062 || 0.00180 [ YES ]  
 -----

Atomic Coordinates (Angstroms)  
 Type X Y Z  
 -----

|   |           |           |           |
|---|-----------|-----------|-----------|
| C | 0.972765  | 0.618535  | -0.000012 |
| C | 0.550786  | -0.736586 | 0.000129  |
| C | -0.828173 | -1.037424 | 0.000065  |
| C | -1.671533 | 0.042138  | -0.000133 |
| C | -1.305434 | 1.380172  | -0.000274 |
| C | 0.061174  | 1.679551  | -0.000213 |
| C | 2.721519  | -1.097631 | 0.000359  |
| H | -1.162139 | -2.070539 | 0.000171  |
| H | -2.042723 | 2.177904  | -0.000432 |
| H | 0.398714  | 2.712150  | -0.000324 |
| S | 2.726423  | 0.668814  | 0.000092  |
| N | 1.568913  | -1.679633 | 0.000328  |
| H | 3.665586  | -1.632012 | 0.000499  |

## Statistical Thermodynamic Analysis

Temperature= 298.150 Kelvin Pressure= 1.00000 Atm  
 =====

SCF Energy= -722.011280519 Predicted Change= -2.342516D-07  
 Zero-point correction (ZPE)= -721.9215 0.08969  
 Internal Energy (U)= -721.9153 0.09598  
 Enthalpy (H)= -721.9143 0.09692  
 Gibbs Free Energy (G)= -721.9531 0.05817  
 -----

Frequencies -- 204.4027 215.0445 359.6273

Supporting Information: **6chlorobenzothiazole.out**

-----  
 Using Gaussian 03: AM64L-G03RevC.02 12-Jun-2004  
 =====

# opt freq ub3lyp/6-31g(d) geom=connectivity  
 #N Geom=AllCheck Guess=Read SCRF=Check GenChk UB3LYP/6-31G(d) Freq  
 -----

Pointgroup= C1 Stoichiometry= C7H4CINS C1[X(C7H4CINS)] #Atoms= 14  
 Charge = 0 Multiplicity = 1  
 -----

SCF Energy= -1182.29434812 Predicted Change= -7.343470D-07  
 =====

Optimization completed. {Found 2 times}  
 Item Max Val. Criteria Pass? RMS Val. Criteria Pass?  
 Force 0.00027 || 0.00045 [ YES ] 0.00006 || 0.00030 [ YES ]  
 Displ 0.00163 || 0.00180 [ YES ] 0.00163 || 0.00180 [ YES ]  
 -----

Atomic Coordinates (Angstroms)  
 Type X Y Z  
 -----

|    |           |           |           |
|----|-----------|-----------|-----------|
| C  | -0.664011 | -0.444490 | 0.000053  |
| C  | -0.950942 | 0.942890  | 0.000199  |
| C  | 0.105087  | 1.865092  | 0.000132  |
| C  | 1.413671  | 1.402456  | -0.000076 |
| C  | 1.668352  | 0.020918  | -0.000219 |
| C  | 0.647728  | -0.923833 | -0.000160 |
| C  | -3.023948 | 0.205044  | 0.000429  |
| H  | -0.114034 | 2.927783  | 0.000235  |
| H  | 2.245459  | 2.098208  | -0.000133 |
| H  | 0.874553  | -1.983892 | -0.000274 |
| S  | -2.168966 | -1.343668 | 0.000197  |
| N  | -2.299090 | 1.272734  | 0.000365  |
| H  | -4.108593 | 0.212818  | 0.000580  |
| Cl | 3.336710  | -0.533754 | -0.000486 |

## Statistical Thermodynamic Analysis

Temperature= 298.150 Kelvin Pressure= 1.00000 Atm  
 =====

SCF Energy= -1182.29434812 Predicted Change= -7.343470D-07  
 Zero-point correction (ZPE)= -1182.2012 0.09309  
 Internal Energy (U)= -1182.1937 0.10063  
 Enthalpy (H)= -1182.1927 0.10157  
 Gibbs Free Energy (G)= -1182.2343 0.05998  
 -----

Frequencies -- 117.3319 196.7899 217.9304

Supporting Information: **6radicalbenzothiazole.out**

-----  
 Using Gaussian 03: AM64L-G03RevC.02 12-Jun-2004  
 =====

# opt freq nosymm ub3lyp/6-31g(d) geom=connectivity  
 #N Geom=AllCheck Guess=Read SCRF=Check GenChk UB3LYP/6-31G(d) Freq  
 -----

Pointgroup= C1 Stoichiometry= C7H4NS(2) C1[X(C7H4NS)] #Atoms= 13  
 Charge = 0 Multiplicity = 2  
 -----

SCF Energy= -722.011458576 Predicted Change= -2.211884D-07  
 =====

Optimization completed. {Found 2 times}  
 Item Max Val. Criteria Pass? RMS Val. Criteria Pass?  
 Force 0.00019 || 0.00045 [ YES ] 0.00004 || 0.00030 [ YES ]  
 Displ 0.00074 || 0.00180 [ YES ] 0.00074 || 0.00180 [ YES ]  
 -----

Atomic Coordinates (Angstroms)  
 Type X Y Z  
 -----

|   |           |           |           |
|---|-----------|-----------|-----------|
| C | -0.663538 | -0.455199 | 0.000062  |
| C | -0.942783 | 0.936636  | 0.000220  |
| C | 0.107049  | 1.869586  | 0.000144  |
| C | 1.424864  | 1.410109  | -0.000093 |
| C | 1.621917  | 0.037079  | -0.000240 |
| C | 0.655831  | -0.938859 | -0.000178 |
| C | -3.022315 | 0.208050  | 0.000357  |
| H | -0.124642 | 2.930604  | 0.000266  |
| H | 2.257416  | 2.107612  | -0.000158 |
| H | 0.885202  | -2.000311 | -0.000280 |
| S | -2.175639 | -1.345747 | 0.000291  |
| N | -2.291139 | 1.270567  | 0.000430  |
| H | -4.106957 | 0.221932  | 0.000507  |

## Statistical Thermodynamic Analysis

Temperature= 298.150 Kelvin Pressure= 1.00000 Atm  
 =====

SCF Energy= -722.011458576 Predicted Change= -2.211884D-07  
 Zero-point correction (ZPE)= -721.9217 0.08968  
 Internal Energy (U)= -721.9154 0.09597  
 Enthalpy (H)= -721.9145 0.09692  
 Gibbs Free Energy (G)= -721.9532 0.05816  
 -----

Frequencies -- 193.8012 225.2964 358.0506



Supporting Information: **7chlorobenzothiazole.out**

-----  
 Using Gaussian 03: AM64L-G03RevC.02 12-Jun-2004  
 =====

# opt freq ub3lyp/6-31g(d) geom=connectivity  
 #N Geom=AllCheck Guess=Read SCRF=Check GenChk UB3LYP/6-31G(d) Freq  
 -----

Pointgroup= C1 Stoichiometry= C7H4CINS C1[X(C7H4CINS)] #Atoms= 14  
 Charge = 0 Multiplicity = 1  
 -----

SCF Energy= -1182.29375165 Predicted Change= -8.881371D-07  
 =====

Optimization completed. {Found 2 times}  
 Item Max Val. Criteria Pass? RMS Val. Criteria Pass?  
 Force 0.00029 || 0.00045 [ YES ] 0.00006 || 0.00030 [ YES ]  
 Displ 0.00114 || 0.00180 [ YES ] 0.00114 || 0.00180 [ YES ]  
 -----

Atomic Coordinates (Angstroms)  
 Type X Y Z  
 -----

|    |           |           |           |
|----|-----------|-----------|-----------|
| C  | -0.174585 | -0.158599 | 0.000023  |
| C  | -1.092250 | 0.922571  | 0.000183  |
| C  | -0.621658 | 2.242735  | 0.000124  |
| C  | 0.749363  | 2.464623  | -0.000085 |
| C  | 1.661526  | 1.396221  | -0.000244 |
| C  | 1.200383  | 0.084482  | -0.000194 |
| C  | -2.543622 | -0.731931 | 0.000408  |
| H  | -1.333366 | 3.061361  | 0.000232  |
| H  | 1.132308  | 3.480730  | -0.000136 |
| H  | 2.729898  | 1.583857  | -0.000410 |
| S  | -1.048646 | -1.673251 | 0.000166  |
| N  | -2.430998 | 0.554234  | 0.000327  |
| H  | -3.496294 | -1.250954 | 0.000561  |
| Cl | 2.334579  | -1.253131 | -0.000382 |

## Statistical Thermodynamic Analysis

Temperature= 298.150 Kelvin Pressure= 1.00000 Atm  
 =====

SCF Energy= -1182.29375165 Predicted Change= -8.881371D-07  
 Zero-point correction (ZPE)= -1182.2005 0.09317  
 Internal Energy (U)= -1182.1930 0.10071  
 Enthalpy (H)= -1182.1920 0.10165  
 Gibbs Free Energy (G)= -1182.2336 0.06011  
 -----

Frequencies -- 128.2319 183.8228 210.2085

Supporting Information: **7radicalbenzothiazole.out**

-----  
 Using Gaussian 03: AM64L-G03RevC.02 12-Jun-2004  
 =====

# opt freq nosymm ub3lyp/6-31g(d) geom=connectivity  
 #N Geom=AllCheck Guess=Read SCRF=Check GenChk UB3LYP/6-31G(d) Freq  
 -----

Pointgroup= C1 Stoichiometry= C7H4NS(2) C1[X(C7H4NS)] #Atoms= 13  
 Charge = 0 Multiplicity = 2  
 -----

SCF Energy= -722.011809465 Predicted Change= -4.842035D-07  
 =====

Optimization completed. {Found 2 times}  
 Item Max Val. Criteria Pass? RMS Val. Criteria Pass?  
 Force 0.00035 || 0.00045 [ YES ] 0.00007 || 0.00030 [ YES ]  
 Displ 0.00109 || 0.00180 [ YES ] 0.00109 || 0.00180 [ YES ]  
 -----

Atomic Coordinates (Angstroms)  
 Type X Y Z  
 -----

|   |           |           |           |
|---|-----------|-----------|-----------|
| C | -0.174527 | -0.167669 | 0.000036  |
| C | -1.096690 | 0.919749  | 0.000209  |
| C | -0.614424 | 2.238342  | 0.000143  |
| C | 0.755997  | 2.467977  | -0.000101 |
| C | 1.678618  | 1.394741  | -0.000283 |
| C | 1.169996  | 0.119273  | -0.000190 |
| C | -2.550000 | -0.738419 | 0.000293  |
| H | -1.324912 | 3.058401  | 0.000277  |
| H | 1.132554  | 3.487519  | -0.000154 |
| H | 2.747779  | 1.587466  | -0.000460 |
| S | -1.055211 | -1.683523 | 0.000323  |
| N | -2.433091 | 0.547092  | 0.000413  |
| H | -3.504030 | -1.254869 | 0.000446  |

-----  
 Statistical Thermodynamic Analysis

Temperature= 298.150 Kelvin Pressure= 1.00000 Atm  
 =====

SCF Energy= -722.011809465 Predicted Change= -4.842035D-07  
 Zero-point correction (ZPE)= -721.9219 0.08986  
 Internal Energy (U)= -721.9156 0.09614  
 Enthalpy (H)= -721.9147 0.09708  
 Gibbs Free Energy (G)= -721.9534 0.05832  
 -----

Frequencies -- 193.6390 211.5853 357.8320

**Chlorobenzothiophene**Supporting Information: **2chlorobenzothiophene.out**-----  
Using Gaussian 03: IA32L-G03RevC.02 12-Jun-2004  
=====# opt freq nosymm ub3lyp/6-31g(d) geom=connectivity  
#N Geom=AllCheck Guess=Read SCRF=Check GenChk UB3LYP/6-31G(d) Freq  
-----Pointgroup= C1 Stoichiometry= C8H5ClS C1[X(C8H5ClS)] #Atoms= 15  
Charge = 0 Multiplicity = 1  
-----SCF Energy= -1166.24399941 Predicted Change= -5.198142D-07  
=====Optimization completed. {Found 2 times}  
Item Max Val. Criteria Pass? RMS Val. Criteria Pass?  
Force 0.00033 || 0.00045 [ YES ] 0.00005 || 0.00030 [ YES ]  
Displ 0.00111 || 0.00180 [ YES ] 0.00111 || 0.00180 [ YES ]  
-----Atomic Coordinates (Angstroms)  
Type X Y Z  
-----

|    |           |           |           |
|----|-----------|-----------|-----------|
| C  | -5.309446 | -0.131994 | -0.812291 |
| C  | -3.893499 | -0.203451 | -0.812386 |
| C  | -3.155624 | 0.994207  | -0.812301 |
| C  | -3.823861 | 2.211218  | -0.812126 |
| C  | -5.228892 | 2.260941  | -0.812034 |
| C  | -5.983600 | 1.091985  | -0.812115 |
| C  | -4.427752 | -2.463019 | -0.812601 |
| C  | -3.413791 | -1.561659 | -0.812566 |
| H  | -2.069447 | 0.959562  | -0.812372 |
| H  | -3.255386 | 3.136942  | -0.812060 |
| H  | -5.733770 | 3.222778  | -0.811897 |
| H  | -7.068929 | 1.131518  | -0.812044 |
| H  | -2.366278 | -1.839085 | -0.812661 |
| S  | -6.032203 | -1.737351 | -0.812422 |
| Cl | -4.274324 | -4.187828 | -0.812799 |

-----  
Statistical Thermodynamic AnalysisTemperature= 298.150 Kelvin Pressure= 1.00000 Atm  
=====SCF Energy= -1166.24399941 Predicted Change= -5.198142D-07  
Zero-point correction (ZPE)= -1166.1390 0.10491  
Internal Energy (U)= -1166.1313 0.11268  
Enthalpy (H)= -1166.1303 0.11362  
Gibbs Free Energy (G)= -1166.1723 0.07165  
-----

Frequencies -- 104.8441 195.8184 199.5144

Supporting Information: **2radicalbenzothiophene.out**

-----  
 Using Gaussian 03: IA32L-G03RevC.02 12-Jun-2004  
 =====

# opt freq nosymm ub3lyp/6-31g(d) geom=connectivity  
 #N Geom=AllCheck Guess=Read SCRF=Check GenChk UB3LYP/6-31G(d) Freq  
 -----

Pointgroup= C1 Stoichiometry= C8H5S(2) C1[X(C8H5S)] #Atoms= 14  
 Charge = 0 Multiplicity = 2  
 -----

SCF Energy= -705.958694787 Predicted Change= -5.037083D-07  
 =====

Optimization completed. {Found 1 times}  
 Item Max Val. Criteria Pass? RMS Val. Criteria Pass?  
 Force 0.00018 || 0.00045 [ YES ] 0.00005 || 0.00030 [ YES ]  
 Displ 0.00200 || 0.00180 [ NO ] 0.00200 || 0.00180 [ YES ]  
 -----

Atomic Coordinates (Angstroms)  
 Type X Y Z  
 -----

|   |           |           |           |
|---|-----------|-----------|-----------|
| C | -5.308892 | -0.130787 | -0.812291 |
| C | -3.891718 | -0.203494 | -0.812387 |
| C | -3.155324 | 0.994259  | -0.812301 |
| C | -3.825049 | 2.211372  | -0.812126 |
| C | -5.229671 | 2.261520  | -0.812034 |
| C | -5.984057 | 1.091774  | -0.812116 |
| C | -4.441714 | -2.429393 | -0.812596 |
| C | -3.404324 | -1.573784 | -0.812567 |
| H | -2.069031 | 0.960775  | -0.812372 |
| H | -3.256367 | 3.137127  | -0.812059 |
| H | -5.734840 | 3.223287  | -0.811897 |
| H | -7.069548 | 1.130421  | -0.812044 |
| H | -2.355795 | -1.848731 | -0.812663 |
| S | -6.036147 | -1.751752 | -0.812423 |

## Statistical Thermodynamic Analysis

Temperature= 298.150 Kelvin Pressure= 1.00000 Atm  
 =====

SCF Energy= -705.958694787 Predicted Change= -5.037083D-07  
 Zero-point correction (ZPE)= -705.8570 0.10165  
 Internal Energy (U)= -705.8505 0.10817  
 Enthalpy (H)= -705.8495 0.10912  
 Gibbs Free Energy (G)= -705.8887 0.06993  
 -----

Frequencies -- 193.3826 205.2581 342.1364

Supporting Information: **3chlorobenzothiophene.out**

-----  
 Using Gaussian 03: IA32L-G03RevC.02 12-Jun-2004  
 =====

# opt freq nosymm ub3lyp/6-31g(d) geom=connectivity  
 #N Geom=AllCheck Guess=Read SCRF=Check GenChk UB3LYP/6-31G(d) Freq  
 -----

Pointgroup= C1 Stoichiometry= C8H5ClS C1[X(C8H5ClS)] #Atoms= 15  
 Charge = 0 Multiplicity = 1  
 -----

SCF Energy= -1166.24732306 Predicted Change= -6.855157D-07  
 =====

Optimization completed. {Found 2 times}  
 Item Max Val. Criteria Pass? RMS Val. Criteria Pass?  
 Force 0.00038 || 0.00045 [ YES ] 0.00005 || 0.00030 [ YES ]  
 Displ 0.00147 || 0.00180 [ YES ] 0.00147 || 0.00180 [ YES ]  
 -----

Atomic Coordinates (Angstroms)  
 Type X Y Z  
 -----

|    |           |           |           |
|----|-----------|-----------|-----------|
| C  | -5.298365 | -0.136248 | -0.812293 |
| C  | -3.884262 | -0.192957 | -0.812361 |
| C  | -3.146829 | 1.003034  | -0.812271 |
| C  | -3.822466 | 2.215111  | -0.812119 |
| C  | -5.228802 | 2.257415  | -0.812054 |
| C  | -5.977770 | 1.086191  | -0.812139 |
| C  | -4.423068 | -2.482919 | -0.812569 |
| C  | -3.427676 | -1.561432 | -0.812522 |
| H  | -2.061773 | 0.966992  | -0.812322 |
| H  | -3.259233 | 3.143897  | -0.812049 |
| H  | -5.737884 | 3.217060  | -0.811934 |
| H  | -7.063361 | 1.119284  | -0.812088 |
| H  | -4.322255 | -3.559219 | -0.812683 |
| S  | -6.009914 | -1.744896 | -0.812424 |
| Cl | -1.732602 | -1.980679 | -0.812641 |

## Statistical Thermodynamic Analysis

Temperature= 298.150 Kelvin Pressure= 1.00000 Atm  
 =====

SCF Energy= -1166.24732306 Predicted Change= -6.855157D-07  
 Zero-point correction (ZPE)= -1166.1423 0.10498  
 Internal Energy (U)= -1166.1346 0.11272  
 Enthalpy (H)= -1166.1336 0.11366  
 Gibbs Free Energy (G)= -1166.1755 0.07177  
 -----

Frequencies -- 132.4095 186.4073 202.9028

Supporting Information: **3radicalbenzothiophene.out**

-----  
 Using Gaussian 03: IA32L-G03RevC.02 12-Jun-2004  
 =====

# opt freq nosymm ub3lyp/6-31g(d) geom=connectivity  
 #N Geom=AllCheck Guess=Read SCRF=Check GenChk UB3LYP/6-31G(d) Freq  
 -----

Pointgroup= C1 Stoichiometry= C8H5S(2) C1[X(C8H5S)] #Atoms= 14  
 Charge = 0 Multiplicity = 2  
 -----

SCF Energy= -705.961931561 Predicted Change= -1.089716D-07  
 =====

Optimization completed. {Found 2 times}  
 Item Max Val. Criteria Pass? RMS Val. Criteria Pass?  
 Force 0.00009 || 0.00045 [ YES ] 0.00002 || 0.00030 [ YES ]  
 Displ 0.00054 || 0.00180 [ YES ] 0.00054 || 0.00180 [ YES ]  
 -----

Atomic Coordinates (Angstroms)  
 Type X Y Z  
 -----

|   |           |           |           |
|---|-----------|-----------|-----------|
| C | -5.298946 | -0.136060 | -0.812293 |
| C | -3.877162 | -0.189478 | -0.812361 |
| C | -3.142882 | 1.009170  | -0.812272 |
| C | -3.820654 | 2.220174  | -0.812119 |
| C | -5.227135 | 2.259434  | -0.812053 |
| C | -5.975917 | 1.087362  | -0.812139 |
| C | -4.405501 | -2.503024 | -0.812571 |
| C | -3.460542 | -1.555829 | -0.812518 |
| H | -2.057390 | 0.976608  | -0.812322 |
| H | -3.259796 | 3.150468  | -0.812049 |
| H | -5.737394 | 3.218540  | -0.811932 |
| H | -7.061812 | 1.121893  | -0.812088 |
| H | -4.322388 | -3.580961 | -0.812685 |
| S | -6.016137 | -1.746983 | -0.812427 |

## Statistical Thermodynamic Analysis

Temperature= 298.150 Kelvin Pressure= 1.00000 Atm  
 =====

SCF Energy= -705.961931561 Predicted Change= -1.089716D-07  
 Zero-point correction (ZPE)= -705.8602 0.10167  
 Internal Energy (U)= -705.8537 0.10817  
 Enthalpy (H)= -705.8528 0.10911  
 Gibbs Free Energy (G)= -705.8919 0.06999  
 -----

Frequencies -- 196.7214 202.5773 346.8577

Supporting Information: **4chlorobenzothiophene.out**

-----  
 Using Gaussian 03: AM64L-G03RevC.02 12-Jun-2004  
 =====

# opt freq ub3lyp/6-31g(d) geom=connectivity  
 #N Geom=AllCheck Guess=Read SCRF=Check GenChk UB3LYP/6-31G(d) Freq  
 -----

Pointgroup= C1 Stoichiometry= C8H5ClS C1[X(C8H5ClS)] #Atoms= 15  
 Charge = 0 Multiplicity = 1  
 -----

SCF Energy= -1166.24927406 Predicted Change= -5.033971D-07  
 =====

Optimization completed. {Found 2 times}  
 Item Max Val. Criteria Pass? RMS Val. Criteria Pass?  
 Force 0.00033 || 0.00045 [ YES ] 0.00005 || 0.00030 [ YES ]  
 Displ 0.00104 || 0.00180 [ YES ] 0.00104 || 0.00180 [ YES ]  
 -----

Atomic Coordinates (Angstroms)  
 Type X Y Z  
 -----

|    |           |           |           |
|----|-----------|-----------|-----------|
| C  | -1.001907 | 0.650388  | 0.000061  |
| C  | 0.007478  | -0.347248 | -0.000041 |
| C  | 1.346668  | 0.085409  | 0.000038  |
| C  | 1.662028  | 1.435092  | 0.000209  |
| C  | 0.635242  | 2.394965  | 0.000307  |
| C  | -0.701552 | 2.015951  | 0.000235  |
| C  | -1.898273 | -1.683878 | -0.000241 |
| C  | -0.540772 | -1.677898 | -0.000220 |
| H  | 2.701889  | 1.743211  | 0.000266  |
| H  | 0.897370  | 3.448903  | 0.000441  |
| H  | -1.491225 | 2.760964  | 0.000312  |
| H  | 0.067443  | -2.574126 | -0.000321 |
| S  | -2.599262 | -0.079540 | -0.000058 |
| H  | -2.553363 | -2.545243 | -0.000358 |
| Cl | 2.641919  | -1.105750 | -0.000088 |

## Statistical Thermodynamic Analysis

Temperature= 298.150 Kelvin Pressure= 1.00000 Atm  
 =====

SCF Energy= -1166.24927406 Predicted Change= -5.033971D-07  
 Zero-point correction (ZPE)= -1166.1444 0.10484  
 Internal Energy (U)= -1166.1367 0.11254  
 Enthalpy (H)= -1166.1357 0.11349  
 Gibbs Free Energy (G)= -1166.1775 0.07168  
 -----

Frequencies -- 128.7169 202.4584 203.8995

Supporting Information: **4radicalbenzothiophene.out**

-----  
 Using Gaussian 03: IA32L-G03RevC.02 12-Jun-2004  
 =====

# opt freq nosymm ub3lyp/6-31g(d) geom=connectivity  
 #N Geom=AllCheck Guess=Read SCRF=Check GenChk UB3LYP/6-31G(d) Freq  
 -----

Pointgroup= C1 Stoichiometry= C8H5S(2) C1[X(C8H5S)] #Atoms= 14  
 Charge = 0 Multiplicity = 2  
 -----

SCF Energy= -705.965841039 Predicted Change= -2.158270D-07  
 =====

Optimization completed. {Found 2 times}  
 Item Max Val. Criteria Pass? RMS Val. Criteria Pass?  
 Force 0.00016 || 0.00045 [ YES ] 0.00004 || 0.00030 [ YES ]  
 Displ 0.00077 || 0.00180 [ YES ] 0.00077 || 0.00180 [ YES ]  
 -----

Atomic Coordinates (Angstroms)  
 Type X Y Z  
 -----

|   |           |           |           |
|---|-----------|-----------|-----------|
| C | -1.005311 | 0.648713  | 0.000063  |
| C | 0.006721  | -0.355584 | -0.000042 |
| C | 1.312179  | 0.117392  | 0.000039  |
| C | 1.678139  | 1.436790  | 0.000207  |
| C | 0.641972  | 2.401445  | 0.000307  |
| C | -0.693875 | 2.014092  | 0.000236  |
| C | -1.900939 | -1.692053 | -0.000247 |
| C | -0.543781 | -1.687256 | -0.000215 |
| H | 2.719292  | 1.747602  | 0.000265  |
| H | 0.896479  | 3.458317  | 0.000442  |
| H | -1.482501 | 2.760581  | 0.000314  |
| H | 0.064450  | -2.584377 | -0.000315 |
| S | -2.603445 | -0.086403 | -0.000054 |
| H | -2.557617 | -2.552308 | -0.000369 |

## Statistical Thermodynamic Analysis

Temperature= 298.150 Kelvin Pressure= 1.00000 Atm  
 =====

SCF Energy= -705.965841039 Predicted Change= -2.158270D-07  
 Zero-point correction (ZPE)= -705.8643 0.10145  
 Internal Energy (U)= -705.8579 0.10792  
 Enthalpy (H)= -705.8569 0.10886  
 Gibbs Free Energy (G)= -705.8960 0.06981  
 -----

Frequencies -- 196.3696 200.3848 344.0993



Supporting Information: **5chlorobenzothiophene.out**

-----  
 Using Gaussian 03: IA32L-G03RevC.02 12-Jun-2004  
 =====

# opt freq ub3lyp/6-31g(d) geom=connectivity  
 #N Geom=AllCheck Guess=Read SCRF=Check GenChk UB3LYP/6-31G(d) Freq  
 -----

Pointgroup= C1 Stoichiometry= C8H5ClS C1[X(C8H5ClS)] #Atoms= 15  
 Charge = 0 Multiplicity = 1  
 -----

SCF Energy= -1166.24906948 Predicted Change= -9.093463D-07  
 =====

Optimization completed. {Found 1 times}  
 Item Max Val. Criteria Pass? RMS Val. Criteria Pass?  
 Force 0.00041 || 0.00045 [ YES ] 0.00006 || 0.00030 [ YES ]  
 Displ 0.00188 || 0.00180 [ NO ] 0.00188 || 0.00180 [ YES ]  
 -----

Atomic Coordinates (Angstroms)  
 Type X Y Z  
 -----

|    |           |           |           |
|----|-----------|-----------|-----------|
| C  | 0.964328  | 0.606263  | 0.000013  |
| C  | 0.536833  | -0.744855 | 0.000112  |
| C  | -0.841431 | -1.028023 | 0.000038  |
| C  | -1.736948 | 0.029019  | -0.000131 |
| C  | -1.311645 | 1.368685  | -0.000229 |
| C  | 0.046603  | 1.661383  | -0.000157 |
| C  | 2.850846  | -1.031227 | 0.000314  |
| C  | 1.648345  | -1.661586 | 0.000279  |
| H  | -1.197595 | -2.052829 | 0.000109  |
| H  | -2.047207 | 2.165413  | -0.000360 |
| H  | 0.380976  | 2.694508  | -0.000232 |
| H  | 1.536358  | -2.740414 | 0.000373  |
| S  | 2.716718  | 0.715568  | 0.000134  |
| H  | 3.833987  | -1.483632 | 0.000432  |
| Cl | -3.465622 | -0.307653 | -0.000229 |

## Statistical Thermodynamic Analysis

Temperature= 298.150 Kelvin Pressure= 1.00000 Atm  
 =====

SCF Energy= -1166.24906948 Predicted Change= -9.093463D-07  
 Zero-point correction (ZPE)= -1166.1443 0.10473  
 Internal Energy (U)= -1166.1366 0.11245  
 Enthalpy (H)= -1166.1356 0.11339  
 Gibbs Free Energy (G)= -1166.1775 0.07151  
 -----

Frequencies -- 105.7704 201.9256 222.5243

Supporting Information: **5radicalbenzothiophene.out**

-----  
 Using Gaussian 03: AM64L-G03RevC.02 12-Jun-2004  
 =====

# opt freq nosymm ub3lyp/6-31g(d) geom=connectivity  
 #N Geom=AllCheck Guess=Read SCRF=Check GenChk UB3LYP/6-31G(d) Freq  
 -----

Pointgroup= C1 Stoichiometry= C8H5S(2) C1[X(C8H5S)] #Atoms= 14  
 Charge = 0 Multiplicity = 2  
 -----

SCF Energy= -705.965519954 Predicted Change= -1.876837D-07  
 =====

Optimization completed. {Found 2 times}  
 Item Max Val. Criteria Pass? RMS Val. Criteria Pass?  
 Force 0.00012 || 0.00045 [ YES ] 0.00003 || 0.00030 [ YES ]  
 Displ 0.00064 || 0.00180 [ YES ] 0.00064 || 0.00180 [ YES ]  
 -----

Atomic Coordinates (Angstroms)  
 Type X Y Z  
 -----

|   |           |           |           |
|---|-----------|-----------|-----------|
| C | 0.954441  | 0.602030  | 0.000014  |
| C | 0.535179  | -0.754500 | 0.000113  |
| C | -0.852140 | -1.039590 | 0.000036  |
| C | -1.694340 | 0.039668  | -0.000131 |
| C | -1.323506 | 1.377146  | -0.000232 |
| C | 0.044124  | 1.665747  | -0.000157 |
| C | 2.851567  | -1.029313 | 0.000309  |
| C | 1.651648  | -1.664974 | 0.000285  |
| H | -1.209595 | -2.066251 | 0.000108  |
| H | -2.056864 | 2.178520  | -0.000363 |
| H | 0.389216  | 2.696387  | -0.000230 |
| H | 1.543844  | -2.744361 | 0.000381  |
| S | 2.709881  | 0.715355  | 0.000139  |
| H | 3.836713  | -1.477591 | 0.000422  |

## Statistical Thermodynamic Analysis

Temperature= 298.150 Kelvin Pressure= 1.00000 Atm  
 =====

SCF Energy= -705.965519954 Predicted Change= -1.876837D-07  
 Zero-point correction (ZPE)= -705.8641 0.10132  
 Internal Energy (U)= -705.8577 0.10779  
 Enthalpy (H)= -705.8567 0.10874  
 Gibbs Free Energy (G)= -705.8958 0.06969  
 -----

Frequencies -- 198.5009 211.8112 347.9077

Supporting Information: **6chlorobenzothiophene.out**

-----  
 Using Gaussian 03: IA32L-G03RevC.02 12-Jun-2004  
 =====

# opt freq ub3lyp/6-31g(d) geom=connectivity  
 #N Geom=AllCheck Guess=Read SCRF=Check GenChk UB3LYP/6-31G(d) Freq  
 -----

Pointgroup= C1 Stoichiometry= C8H5ClS C1[X(C8H5ClS)] #Atoms= 15  
 Charge = 0 Multiplicity = 1  
 -----

SCF Energy= -1166.24897996 Predicted Change= -7.455020D-07  
 =====

Optimization completed. {Found 2 times}  
 Item Max Val. Criteria Pass? RMS Val. Criteria Pass?  
 Force 0.00037 || 0.00045 [ YES ] 0.00006 || 0.00030 [ YES ]  
 Displ 0.00165 || 0.00180 [ YES ] 0.00165 || 0.00180 [ YES ]  
 -----

Atomic Coordinates (Angstroms)  
 Type X Y Z  
 -----

|    |           |           |           |
|----|-----------|-----------|-----------|
| C  | -0.656694 | -0.417282 | 0.000058  |
| C  | -0.941935 | 0.971161  | 0.000158  |
| C  | 0.132819  | 1.879004  | 0.000074  |
| C  | 1.438365  | 1.411460  | -0.000102 |
| C  | 1.683175  | 0.027319  | -0.000197 |
| C  | 0.653943  | -0.904668 | -0.000120 |
| C  | -3.102977 | 0.093652  | 0.000372  |
| C  | -2.359148 | 1.229073  | 0.000332  |
| H  | -0.059528 | 2.948456  | 0.000146  |
| H  | 2.274908  | 2.101622  | -0.000170 |
| H  | 0.868943  | -1.967643 | -0.000196 |
| H  | -2.786976 | 2.225873  | 0.000427  |
| S  | -2.133397 | -1.367181 | 0.000188  |
| H  | -4.181783 | 0.008381  | 0.000497  |
| Cl | 3.349029  | -0.540006 | -0.000421 |

## Statistical Thermodynamic Analysis

Temperature= 298.150 Kelvin Pressure= 1.00000 Atm  
 =====

SCF Energy= -1166.24897996 Predicted Change= -7.455020D-07  
 Zero-point correction (ZPE)= -1166.1442 0.10471  
 Internal Energy (U)= -1166.1365 0.11243  
 Enthalpy (H)= -1166.1356 0.11337  
 Gibbs Free Energy (G)= -1166.1774 0.07149  
 -----

Frequencies -- 114.9042 197.5353 212.6795

Supporting Information: **6radicalbenzothiophene.out**

Using Gaussian 03: AM64L-G03RevC.02 12-Jun-2004

# opt freq nosymm ub3lyp/6-31g(d) geom=connectivity  
 #N Geom=AllCheck Guess=Read SCRF=Check GenChk UB3LYP/6-31G(d) Freq

Pointgroup= C1 Stoichiometry= C8H5S(2) C1[X(C8H5S)] #Atoms= 14  
 Charge = 0 Multiplicity = 2

SCF Energy= -705.965631384 Predicted Change= -1.471136D-07

Optimization completed. {Found 2 times}  
 Item Max Val. Criteria Pass? RMS Val. Criteria Pass?  
 Force 0.00012 || 0.00045 [ YES ] 0.00003 || 0.00030 [ YES ]  
 Displ 0.00061 || 0.00180 [ YES ] 0.00061 || 0.00180 [ YES ]

Atomic Coordinates (Angstroms)  
 Type X Y Z

|   |           |           |           |
|---|-----------|-----------|-----------|
| C | -0.656396 | -0.428412 | 0.000059  |
| C | -0.934491 | 0.964303  | 0.000157  |
| C | 0.133189  | 1.883093  | 0.000073  |
| C | 1.448652  | 1.419089  | -0.000105 |
| C | 1.638284  | 0.044431  | -0.000192 |
| C | 0.662020  | -0.919185 | -0.000122 |
| C | -3.102928 | 0.095817  | 0.000367  |
| C | -2.352298 | 1.226080  | 0.000337  |
| H | -0.070759 | 2.951487  | 0.000147  |
| H | 2.284159  | 2.113286  | -0.000172 |
| H | 0.879483  | -1.983642 | -0.000197 |
| H | -2.774942 | 2.225284  | 0.000433  |
| S | -2.141918 | -1.370190 | 0.000195  |
| H | -4.182341 | 0.017787  | 0.000488  |

## Statistical Thermodynamic Analysis

Temperature= 298.150 Kelvin Pressure= 1.00000 Atm

SCF Energy= -705.965631384 Predicted Change= -1.471136D-07  
 Zero-point correction (ZPE)= -705.8643 0.10128  
 Internal Energy (U)= -705.8578 0.10776  
 Enthalpy (H)= -705.8569 0.10870  
 Gibbs Free Energy (G)= -705.8959 0.06964

Frequencies -- 194.3851 214.1909 347.8857

Supporting Information: **7chlorobenzothiophene.out**

-----  
 Using Gaussian 03: IA32L-G03RevC.02 12-Jun-2004  
 =====

# opt freq ub3lyp/6-31g(d) geom=connectivity  
 #N Geom=AllCheck Guess=Read SCRF=Check GenChk UB3LYP/6-31G(d) Freq  
 -----

Pointgroup= C1 Stoichiometry= C8H5ClS C1[X(C8H5ClS)] #Atoms= 15  
 Charge = 0 Multiplicity = 1  
 -----

SCF Energy= -1166.24843852 Predicted Change= -2.494259D-07  
 =====

Optimization completed. {Found 2 times}  
 Item Max Val. Criteria Pass? RMS Val. Criteria Pass?  
 Force 0.00018 || 0.00045 [ YES ] 0.00003 || 0.00030 [ YES ]  
 Displ 0.00069 || 0.00180 [ YES ] 0.00069 || 0.00180 [ YES ]  
 -----

Atomic Coordinates (Angstroms)  
 Type X Y Z  
 -----

|    |           |           |           |
|----|-----------|-----------|-----------|
| C  | -0.179153 | -0.130342 | 0.000025  |
| C  | -1.065617 | 0.977660  | 0.000135  |
| C  | -0.537639 | 2.281185  | 0.000061  |
| C  | 0.837923  | 2.462107  | -0.000118 |
| C  | 1.714799  | 1.363274  | -0.000228 |
| C  | 1.204100  | 0.072149  | -0.000155 |
| C  | -2.577040 | -0.798938 | 0.000336  |
| C  | -2.442164 | 0.551608  | 0.000308  |
| H  | -1.207638 | 3.136361  | 0.000143  |
| H  | 1.253232  | 3.465668  | -0.000178 |
| H  | 2.789065  | 1.513288  | -0.000368 |
| H  | -3.280553 | 1.239884  | 0.000410  |
| S  | -1.047106 | -1.652585 | 0.000143  |
| H  | -3.495667 | -1.371242 | 0.000456  |
| Cl | 2.292000  | -1.306754 | -0.000291 |

## Statistical Thermodynamic Analysis

Temperature= 298.150 Kelvin Pressure= 1.00000 Atm  
 =====

SCF Energy= -1166.24843852 Predicted Change= -2.494259D-07  
 Zero-point correction (ZPE)= -1166.1436 0.10477  
 Internal Energy (U)= -1166.1359 0.11249  
 Enthalpy (H)= -1166.1349 0.11344  
 Gibbs Free Energy (G)= -1166.1768 0.07162  
 -----

Frequencies -- 127.6515 182.5035 202.9564

Supporting Information: **7radicalbenzothiophene.out**

Using Gaussian 03: AM64L-G03RevC.02 12-Jun-2004

# opt freq nosymm ub3lyp/6-31g(d) geom=connectivity  
#N Geom=AllCheck Guess=Read SCRF=Check GenChk UB3LYP/6-31G(d) Freq

Pointgroup= C1 Stoichiometry= C8H5S(2) C1[X(C8H5S)] #Atoms= 14  
Charge = 0 Multiplicity = 2

SCF Energy= -705.965532267 Predicted Change= -1.899172D-07

Optimization completed. {Found 2 times}  
Item Max Val. Criteria Pass? RMS Val. Criteria Pass?  
Force 0.00017 || 0.00045 [ YES ] 0.00003 || 0.00030 [ YES ]  
Displ 0.00069 || 0.00180 [ YES ] 0.00069 || 0.00180 [ YES ]

Atomic Coordinates (Angstroms)  
Type X Y Z

|   |           |           |           |
|---|-----------|-----------|-----------|
| C | -0.179243 | -0.138082 | 0.000027  |
| C | -1.069963 | 0.975609  | 0.000136  |
| C | -0.530180 | 2.276767  | 0.000059  |
| C | 0.845508  | 2.465238  | -0.000121 |
| C | 1.732206  | 1.361115  | -0.000231 |
| C | 1.175755  | 0.107543  | -0.000151 |
| C | -2.582494 | -0.804400 | 0.000331  |
| C | -2.445684 | 0.546389  | 0.000314  |
| H | -1.198538 | 3.133656  | 0.000142  |
| H | 1.254402  | 3.472454  | -0.000180 |
| H | 2.807614  | 1.515760  | -0.000372 |
| H | -3.285459 | 1.233469  | 0.000417  |
| S | -1.054345 | -1.661737 | 0.000152  |
| H | -3.503036 | -1.373705 | 0.000447  |

## Statistical Thermodynamic Analysis

Temperature= 298.150 Kelvin Pressure= 1.00000 Atm

SCF Energy= -705.965532267 Predicted Change= -1.899172D-07  
Zero-point correction (ZPE)= -705.8640 0.10145  
Internal Energy (U)= -705.8576 0.10791  
Enthalpy (H)= -705.8566 0.10885  
Gibbs Free Energy (G)= -705.8957 0.06980

Frequencies -- 195.1892 202.6016 346.7274

**Chloroimidazoles**Supporting Information: **24dichloroimidazole.out**-----  
Using Gaussian 03: IA32L-G03RevC.02 12-Jun-2004  
=====

# opt freq b3lyp/6-31g(d)

#N Geom=AllCheck Guess=Read SCRF=Check GenChk RB3LYP/6-31G(d) Freq

-----  
Pointgroup= C1 Stoichiometry= C3H2Cl2N2 C1[X(C3H2Cl2N2)] #Atoms= 9Charge = 0 Multiplicity = 1  
-----SCF Energy= -1145.39992279 Predicted Change= -5.543487D-07  
=====

Optimization completed. {Found 2 times}

Item Max Val. Criteria Pass? RMS Val. Criteria Pass?

Force 0.00025 || 0.00045 [ YES ] 0.00007 || 0.00030 [ YES ]

Displ 0.00110 || 0.00180 [ YES ] 0.00110 || 0.00180 [ YES ]  
-----

Atomic Coordinates (Angstroms)

Type X Y Z

-----  
C 1.029364 0.001781 0.000019  
C -1.079545 0.083520 0.000012  
C -0.677501 1.394487 0.000208  
N 0.705293 1.324729 0.000019  
H 1.354419 2.098827 0.000039  
H -1.218806 2.326852 0.000341  
N -0.017893 -0.781288 -0.000070  
Cl 2.676570 -0.511257 -0.000056  
Cl -2.710766 -0.495125 -0.000029  
-----

Statistical Thermodynamic Analysis

Temperature= 298.150 Kelvin Pressure= 1.00000 Atm  
=====

SCF Energy= -1145.39992279 Predicted Change= -5.543487D-07

Zero-point correction (ZPE)= -1145.3476 0.05224

Internal Energy (U)= -1145.3417 0.05820

Enthalpy (H)= -1145.3407 0.05914

Gibbs Free Energy (G)= -1145.3786 0.02123  
-----

Frequencies -- 162.2059 207.0135 295.3928

Supporting Information: **25dichloroimidazole.out**

-----  
 Using Gaussian 03: IA32L-G03RevC.02 12-Jun-2004  
 =====

# opt freq b3lyp/6-31g(d)

#N Geom=AllCheck Guess=Read SCRF=Check GenChk RB3LYP/6-31G(d) Freq

-----  
 Pointgroup= C1 Stoichiometry= C3H2Cl2N2 C1[X(C3H2Cl2N2)] #Atoms= 9

Charge = 0 Multiplicity = 1  
 -----

SCF Energy= -1145.39747870 Predicted Change= -7.704615D-08  
 =====

Optimization completed. {Found 2 times}

Item Max Val. Criteria Pass? RMS Val. Criteria Pass?

Force 0.00010 || 0.00045 [ YES ] 0.00003 || 0.00030 [ YES ]

Displ 0.00051 || 0.00180 [ YES ] 0.00051 || 0.00180 [ YES ]  
 -----

Atomic Coordinates (Angstroms)

| Atomic Type | X         | Y         | Z         |
|-------------|-----------|-----------|-----------|
| C           | 1.084466  | 0.160222  | 0.000073  |
| C           | -0.625245 | 1.436291  | 0.000085  |
| C           | -1.104952 | 0.153864  | -0.000082 |
| N           | 0.002336  | -0.673286 | 0.000065  |
| H           | 0.004827  | -1.683621 | 0.000030  |
| H           | -1.185166 | 2.359973  | 0.000116  |
| N           | 0.755959  | 1.422189  | 0.000152  |
| Cl          | 2.689212  | -0.477148 | 0.000139  |
| Cl          | -2.704114 | -0.488789 | -0.000263 |

-----  
 Statistical Thermodynamic Analysis

Temperature= 298.150 Kelvin Pressure= 1.00000 Atm  
 =====

SCF Energy= -1145.39747870 Predicted Change= -7.704615D-08

Zero-point correction (ZPE)= -1145.3451 0.05231

Internal Energy (U)= -1145.3391 0.05831

Enthalpy (H)= -1145.3382 0.05926

Gibbs Free Energy (G)= -1145.3762 0.02122  
 -----

Frequencies -- 154.8818 197.3596 286.1680



Supporting Information: **2chloro4radicalimidazole.out**

-----  
 Using Gaussian 03: IA32L-G03RevC.02 12-Jun-2004  
 =====

#opt nosymm freq ub3lyp/6-31g(d)  
 #N Geom=AllCheck Guess=Read SCRF=Check GenChk UB3LYP/6-31G(d) Freq  
 -----

Pointgroup= C1 Stoichiometry= C3H2ClN2(2) C1[X(C3H2ClN2)] #Atoms= 8  
 Charge = 0 Multiplicity = 2  
 -----

SCF Energy= -685.112122251 Predicted Change= -2.746842D-07  
 =====

Optimization completed. {Found 2 times}  
 Item Max Val. Criteria Pass? RMS Val. Criteria Pass?  
 Force 0.00009 || 0.00045 [ YES ] 0.00004 || 0.00030 [ YES ]  
 Displ 0.00126 || 0.00180 [ YES ] 0.00126 || 0.00180 [ YES ]  
 -----

Atomic Coordinates (Angstroms)  
 Type X Y Z  
 -----

|    |           |           |           |
|----|-----------|-----------|-----------|
| C  | 1.030728  | 0.002085  | 0.000285  |
| C  | -1.062154 | 0.079164  | -0.000298 |
| C  | -0.687404 | 1.394223  | 0.000539  |
| N  | 0.705236  | 1.325044  | -0.000327 |
| H  | 1.360042  | 2.095521  | -0.000550 |
| H  | -1.223726 | 2.328942  | 0.000865  |
| N  | -0.030050 | -0.775276 | -0.000433 |
| Cl | 2.679229  | -0.512052 | 0.000430  |

-----

## Statistical Thermodynamic Analysis

Temperature= 298.150 Kelvin Pressure= 1.00000 Atm  
 =====

SCF Energy= -685.112122251 Predicted Change= -2.746842D-07  
 Zero-point correction (ZPE)= -685.0629 0.04913  
 Internal Energy (U)= -685.0582 0.05391  
 Enthalpy (H)= -685.0572 0.05485  
 Gibbs Free Energy (G)= -685.0922 0.01984  
 -----

Frequencies -- 234.0516 324.2905 492.7059

Supporting Information: **2chloro5radicalimidazole.out**

-----  
 Using Gaussian 03: IA32L-G03RevC.02 12-Jun-2004  
 =====

#opt nosymm freq ub3lyp/6-31g(d)  
 #N Geom=AllCheck Guess=Read SCRF=Check GenChk UB3LYP/6-31G(d) Freq  
 -----

Pointgroup= C1 Stoichiometry= C3H2ClN2(2) C1[X(C3H2ClN2)] #Atoms= 8  
 Charge = 0 Multiplicity = 2  
 -----

SCF Energy= -685.107949099 Predicted Change= -4.750598D-07  
 =====

Optimization completed. {Found 2 times}  
 Item Max Val. Criteria Pass? RMS Val. Criteria Pass?  
 Force 0.00034 || 0.00045 [ YES ] 0.00008 || 0.00030 [ YES ]  
 Displ 0.00123 || 0.00180 [ YES ] 0.00123 || 0.00180 [ YES ]  
 -----

Atomic Coordinates (Angstroms)  
 Type X Y Z  
 -----

|    |           |           |           |
|----|-----------|-----------|-----------|
| C  | 1.084430  | 0.149573  | 0.000157  |
| C  | -0.637882 | 1.444921  | 0.000093  |
| C  | -1.088546 | 0.157775  | 0.000085  |
| N  | 0.000686  | -0.681717 | 0.000004  |
| H  | 0.000496  | -1.691238 | -0.000077 |
| H  | -1.185760 | 2.373904  | 0.000097  |
| N  | 0.750915  | 1.413035  | 0.000015  |
| Cl | 2.697099  | -0.467770 | 0.000204  |

-----

## Statistical Thermodynamic Analysis

Temperature= 298.150 Kelvin Pressure= 1.00000 Atm  
 =====

SCF Energy= -685.107949099 Predicted Change= -4.750598D-07  
 Zero-point correction (ZPE)= -685.0589 0.04897  
 Internal Energy (U)= -685.0541 0.05383  
 Enthalpy (H)= -685.0531 0.05478  
 Gibbs Free Energy (G)= -685.0883 0.01960  
 -----

Frequencies -- 223.8663 320.0696 420.1323

Supporting Information: **2chloroimidazole.out**

-----  
 Using Gaussian 03: IA32L-G03RevC.02 12-Jun-2004  
 =====

# opt=(modredundant) freq b3lyp/6-31g(d) geom=connectivity  
 #N Geom=AllCheck Guess=Read SCRF=Check GenChk RB3LYP/6-31G(d) Freq  
 -----

Pointgroup= C1 Stoichiometry= C3H3ClN2 C1[X(C3H3ClN2)] #Atoms= 9  
 Charge = 0 Multiplicity = 1  
 -----

SCF Energy= -685.807434578 Predicted Change= -2.332688D-07  
 =====

Optimization completed. {Found 2 times}  
 Item Max Val. Criteria Pass? RMS Val. Criteria Pass?  
 Force 0.00020 || 0.00045 [ YES ] 0.00005 || 0.00030 [ YES ]  
 Displ 0.00123 || 0.00180 [ YES ] 0.00123 || 0.00180 [ YES ]  
 -----

Atomic Coordinates (Angstroms)  
 Type X Y Z  
 -----

|    |           |           |           |
|----|-----------|-----------|-----------|
| C  | 0.224293  | -0.087193 | -0.000032 |
| C  | -1.804522 | -0.717410 | 0.000072  |
| C  | -1.847508 | 0.652692  | 0.000126  |
| N  | -0.523480 | 1.054059  | 0.000125  |
| H  | -0.168646 | 1.999253  | 0.000264  |
| H  | -2.632900 | -1.412040 | 0.000077  |
| H  | -2.660483 | 1.362749  | 0.000194  |
| N  | -0.499749 | -1.172474 | -0.000033 |
| Cl | 1.952415  | -0.012329 | -0.000128 |

-----

## Statistical Thermodynamic Analysis

Temperature= 298.150 Kelvin Pressure= 1.00000 Atm  
 =====

SCF Energy= -685.807434578 Predicted Change= -2.332688D-07  
 Zero-point correction (ZPE)= -685.7456 0.06178  
 Internal Energy (U)= -685.7408 0.06660  
 Enthalpy (H)= -685.7398 0.06755  
 Gibbs Free Energy (G)= -685.7743 0.03307  
 -----

Frequencies -- 233.0405 320.1598 492.2723

Supporting Information: **2chloroimidazol radical.out**

-----  
 Using Gaussian 03: IA32L-G03RevC.02 12-Jun-2004  
 =====

# opt nosymm freq ub3lyp/6-31g(d) geom=connectivity  
 #N Geom=AllCheck Guess=Read SCRF=Check GenChk UB3LYP/6-31G(d) Freq  
 -----

Pointgroup= C1 Stoichiometry= C3H3N2(2) C1[X(C3H3N2)] #Atoms= 8  
 Charge = 0 Multiplicity = 2  
 -----

SCF Energy= -225.520336734 Predicted Change= -6.327915D-07  
 =====

Optimization completed. {Found 2 times}  
 Item Max Val. Criteria Pass? RMS Val. Criteria Pass?  
 Force 0.00036 || 0.00045 [ YES ] 0.00011 || 0.00030 [ YES ]  
 Displ 0.00080 || 0.00180 [ YES ] 0.00080 || 0.00180 [ YES ]  
 -----

Atomic Coordinates (Angstroms)  
 Type X Y Z  
 -----

|   |           |           |           |
|---|-----------|-----------|-----------|
| C | 0.215508  | -0.092113 | 0.000208  |
| C | -1.812155 | -0.718422 | -0.000101 |
| C | -1.849996 | 0.651410  | 0.000365  |
| N | -0.514540 | 1.054200  | -0.000038 |
| H | -0.162477 | 1.999262  | -0.000112 |
| H | -2.636678 | -1.417606 | -0.000281 |
| H | -2.663935 | 1.361498  | 0.000527  |
| N | -0.488722 | -1.158592 | 0.000224  |

-----

## Statistical Thermodynamic Analysis

Temperature= 298.150 Kelvin Pressure= 1.00000 Atm  
 =====

SCF Energy= -225.520336734 Predicted Change= -6.327915D-07  
 Zero-point correction (ZPE)= -225.4620 0.05827  
 Internal Energy (U)= -225.4582 0.06212  
 Enthalpy (H)= -225.4572 0.06306  
 Gibbs Free Energy (G)= -225.4889 0.03137  
 -----

Frequencies -- 418.9965 582.9750 625.1026

Supporting Information: **45dichloroimidazole.out**

-----  
 Using Gaussian 03: IA32L-G03RevC.02 12-Jun-2004  
 =====

# opt freq b3lyp/6-31g(d)

#N Geom=AllCheck Guess=Read SCRF=Check GenChk RB3LYP/6-31G(d) Freq

-----  
 Pointgroup= C1 Stoichiometry= C3H2Cl2N2 C1[X(C3H2Cl2N2)] #Atoms= 9

Charge = 0 Multiplicity = 1  
 -----

SCF Energy= -1145.39741218 Predicted Change= -2.389251D-07  
 =====

Optimization completed. {Found 2 times}

Item Max Val. Criteria Pass? RMS Val. Criteria Pass?

Force 0.00008 || 0.00045 [ YES ] 0.00003 || 0.00030 [ YES ]

Displ 0.00119 || 0.00180 [ YES ] 0.00119 || 0.00180 [ YES ]  
 -----

Atomic Coordinates (Angstroms)

| Atomic Type | X         | Y         | Z         |
|-------------|-----------|-----------|-----------|
| C           | 0.127049  | 2.195841  | 0.000470  |
| C           | -0.700696 | 0.231168  | 0.000095  |
| C           | 0.663236  | 0.059378  | 0.000021  |
| N           | 1.187310  | 1.335461  | -0.000184 |
| H           | 2.171593  | 1.564952  | -0.000313 |
| N           | -1.023712 | 1.556865  | -0.000492 |
| Cl          | 1.657406  | -1.340680 | 0.000002  |
| H           | 0.250679  | 3.269895  | 0.000652  |
| Cl          | -1.898877 | -1.012229 | 0.000049  |

-----  
 Statistical Thermodynamic Analysis

Temperature= 298.150 Kelvin Pressure= 1.00000 Atm  
 =====

SCF Energy= -1145.39741218 Predicted Change= -2.389251D-07

Zero-point correction (ZPE)= -1145.3449 0.05247

Internal Energy (U)= -1145.3389 0.05844

Enthalpy (H)= -1145.3380 0.05938

Gibbs Free Energy (G)= -1145.3760 0.02140  
 -----

Frequencies -- 166.4763 202.2684 258.2555

Supporting Information: **4chloro2radicalimidazole.out**

-----  
 Using Gaussian 03: IA32L-G03RevC.02 12-Jun-2004  
 =====

#opt nosymm freq ub3lyp/6-31g(d)  
 #N Geom=AllCheck Guess=Read SCRF=Check GenChk UB3LYP/6-31G(d) Freq  
 -----

Pointgroup= C1 Stoichiometry= C3H2ClN2(2) C1[X(C3H2ClN2)] #Atoms= 8  
 Charge = 0 Multiplicity = 2  
 -----

SCF Energy= -685.113401751 Predicted Change= -1.204715D-07  
 =====

Optimization completed. {Found 2 times}  
 Item Max Val. Criteria Pass? RMS Val. Criteria Pass?  
 Force 0.00010 || 0.00045 [ YES ] 0.00003 || 0.00030 [ YES ]  
 Displ 0.00069 || 0.00180 [ YES ] 0.00069 || 0.00180 [ YES ]  
 -----

Atomic Coordinates (Angstroms)  
 Type X Y Z  
 -----

|    |           |           |           |
|----|-----------|-----------|-----------|
| C  | 1.017138  | 0.001100  | -0.000233 |
| C  | -1.085076 | 0.084339  | 0.000173  |
| C  | -0.679990 | 1.394212  | -0.000081 |
| N  | 0.713386  | 1.322528  | 0.000269  |
| H  | 1.360117  | 2.097092  | 0.000499  |
| H  | -1.223329 | 2.326252  | -0.000069 |
| N  | -0.002941 | -0.775457 | -0.000385 |
| Cl | -2.714739 | -0.496285 | 0.000366  |

-----

## Statistical Thermodynamic Analysis

Temperature= 298.150 Kelvin Pressure= 1.00000 Atm  
 =====

SCF Energy= -685.113401751 Predicted Change= -1.204715D-07  
 Zero-point correction (ZPE)= -685.0644 0.04890  
 Internal Energy (U)= -685.0596 0.05377  
 Enthalpy (H)= -685.0586 0.05471  
 Gibbs Free Energy (G)= -685.0938 0.01955  
 -----

Frequencies -- 248.7898 320.3459 415.4843

Supporting Information: **4chloro5radicalimidazole.out**

-----  
 Using Gaussian 03: IA32L-G03RevC.02 12-Jun-2004  
 =====

#opt nosymm freq ub3lyp/6-31g(d)  
 #N Geom=AllCheck Guess=Read SCRF=Check GenChk UB3LYP/6-31G(d) Freq  
 -----

Pointgroup= C1 Stoichiometry= C3H2ClN2(2) C1[X(C3H2ClN2)] #Atoms= 8  
 Charge = 0 Multiplicity = 2  
 -----

SCF Energy= -685.106479004 Predicted Change= -3.779683D-08  
 =====

Optimization completed. {Found 2 times}  
 Item Max Val. Criteria Pass? RMS Val. Criteria Pass?  
 Force 0.00008 || 0.00045 [ YES ] 0.00002 || 0.00030 [ YES ]  
 Displ 0.00035 || 0.00180 [ YES ] 0.00035 || 0.00180 [ YES ]  
 -----

Atomic Coordinates (Angstroms)  
 Type X Y Z  
 -----

|    |           |           |           |
|----|-----------|-----------|-----------|
| C  | 0.134271  | 2.199178  | 0.000191  |
| C  | -0.703432 | 0.215789  | -0.000013 |
| C  | 0.654976  | 0.075355  | -0.000154 |
| N  | 1.194424  | 1.336959  | -0.000045 |
| H  | 2.178041  | 1.565959  | -0.000111 |
| N  | -1.015240 | 1.550608  | 0.000176  |
| H  | 0.245286  | 3.274743  | 0.000336  |
| Cl | -1.911743 | -1.017262 | -0.000081 |

-----

## Statistical Thermodynamic Analysis

Temperature= 298.150 Kelvin Pressure= 1.00000 Atm  
 =====

SCF Energy= -685.106479004 Predicted Change= -3.779683D-08  
 Zero-point correction (ZPE)= -685.0575 0.04897  
 Internal Energy (U)= -685.0526 0.05385  
 Enthalpy (H)= -685.0516 0.05479  
 Gibbs Free Energy (G)= -685.0869 0.01957  
 -----

Frequencies -- 220.7982 322.5313 401.3830

Supporting Information: **4chloroimidazole.out**

-----  
 Using Gaussian 03: IA32L-G03RevC.02 12-Jun-2004  
 =====

# opt=(modredundant) freq b3lyp/6-31g(d) geom=connectivity  
 #N Geom=AllCheck Guess=Read SCRF=Check GenChk RB3LYP/6-31G(d) Freq  
 -----

Pointgroup= C1 Stoichiometry= C3H3ClN2 C1[X(C3H3ClN2)] #Atoms= 9  
 Charge = 0 Multiplicity = 1  
 -----

SCF Energy= -685.808586309 Predicted Change= -2.266710D-07  
 =====

Optimization completed. {Found 2 times}  
 Item Max Val. Criteria Pass? RMS Val. Criteria Pass?  
 Force 0.00020 || 0.00045 [ YES ] 0.00005 || 0.00030 [ YES ]  
 Displ 0.00119 || 0.00180 [ YES ] 0.00119 || 0.00180 [ YES ]  
 -----

Atomic Coordinates (Angstroms)  
 Type X Y Z  
 -----

|    |           |           |           |
|----|-----------|-----------|-----------|
| C  | 1.724542  | -0.763293 | -0.000088 |
| C  | -0.254940 | 0.002756  | 0.000017  |
| C  | 0.551919  | 1.113817  | 0.000047  |
| N  | 1.832209  | 0.597351  | 0.000065  |
| H  | 2.688278  | 1.133290  | 0.000206  |
| H  | 2.586438  | -1.416390 | -0.000155 |
| H  | 0.339688  | 2.170853  | 0.000102  |
| N  | 0.466791  | -1.155053 | -0.000125 |
| Cl | -1.990384 | -0.006089 | 0.000024  |

-----

## Statistical Thermodynamic Analysis

Temperature= 298.150 Kelvin Pressure= 1.00000 Atm  
 =====

SCF Energy= -685.808586309 Predicted Change= -2.266710D-07  
 Zero-point correction (ZPE)= -685.7467 0.06186  
 Internal Energy (U)= -685.7419 0.06666  
 Enthalpy (H)= -685.7409 0.06761  
 Gibbs Free Energy (G)= -685.7754 0.03316  
 -----

Frequencies -- 249.3284 317.1710 483.8614



Supporting Information: **4chloroimidazol radical.out**

-----  
 Using Gaussian 03: IA32L-G03RevC.02 12-Jun-2004  
 =====

# opt nosymm freq ub3lyp/6-31g(d) geom=connectivity  
 #N Geom=AllCheck Guess=Read SCRF=Check GenChk UB3LYP/6-31G(d) Freq  
 -----

Pointgroup= C1 Stoichiometry= C3H3N2(2) C1[X(C3H3N2)] #Atoms= 8  
 Charge = 0 Multiplicity = 2  
 -----

SCF Energy= -225.520044667 Predicted Change= -4.667938D-07  
 =====

Optimization completed. {Found 2 times}  
 Item Max Val. Criteria Pass? RMS Val. Criteria Pass?  
 Force 0.00026 || 0.00045 [ YES ] 0.00009 || 0.00030 [ YES ]  
 Displ 0.00136 || 0.00180 [ YES ] 0.00136 || 0.00180 [ YES ]  
 -----

Atomic Coordinates (Angstroms)  
 Type X Y Z  
 -----

|   |           |           |           |
|---|-----------|-----------|-----------|
| C | 1.727395  | -0.763739 | 0.000108  |
| C | -0.243189 | -0.006836 | -0.000284 |
| C | 0.541865  | 1.115394  | 0.000255  |
| N | 1.832823  | 0.597060  | -0.000159 |
| H | 2.692689  | 1.128760  | -0.000181 |
| H | 2.588798  | -1.417859 | 0.000191  |
| H | 0.336698  | 2.173475  | 0.000453  |
| N | 0.457846  | -1.142924 | -0.000313 |

-----

## Statistical Thermodynamic Analysis

Temperature= 298.150 Kelvin Pressure= 1.00000 Atm  
 =====

SCF Energy= -225.520044667 Predicted Change= -4.667938D-07  
 Zero-point correction (ZPE)= -225.4614 0.05856  
 Internal Energy (U)= -225.4577 0.06230  
 Enthalpy (H)= -225.4567 0.06325  
 Gibbs Free Energy (G)= -225.4883 0.03173  
 -----

Frequencies -- 523.4113 599.8841 671.1499

Supporting Information: **5chloro2radicalimidazole.out**

-----  
 Using Gaussian 03: IA32L-G03RevC.02 12-Jun-2004  
 =====

#opt nosymm freq ub3lyp/6-31g(d)  
 #N Geom=AllCheck Guess=Read SCRF=Check GenChk UB3LYP/6-31G(d) Freq  
 -----

Pointgroup= C1 Stoichiometry= C3H2ClN2(2) C1[X(C3H2ClN2)] #Atoms= 8  
 Charge = 0 Multiplicity = 2  
 -----

SCF Energy= -685.111951454 Predicted Change= -1.928187D-07  
 =====

Optimization completed. {Found 2 times}  
 Item Max Val. Criteria Pass? RMS Val. Criteria Pass?  
 Force 0.00007 || 0.00045 [ YES ] 0.00003 || 0.00030 [ YES ]  
 Displ 0.00097 || 0.00180 [ YES ] 0.00097 || 0.00180 [ YES ]  
 -----

Atomic Coordinates (Angstroms)  
 Type X Y Z  
 -----

|    |           |           |           |
|----|-----------|-----------|-----------|
| C  | 1.078168  | 0.167214  | -0.000209 |
| C  | -0.632966 | 1.440709  | 0.000327  |
| C  | -1.105517 | 0.155464  | -0.000320 |
| N  | 0.011734  | -0.676696 | 0.000283  |
| H  | 0.011549  | -1.685921 | 0.000478  |
| H  | -1.188536 | 2.366823  | 0.000570  |
| N  | 0.759965  | 1.403635  | -0.000296 |
| Cl | -2.706286 | -0.484385 | -0.000656 |

-----

## Statistical Thermodynamic Analysis

Temperature= 298.150 Kelvin Pressure= 1.00000 Atm  
 =====

SCF Energy= -685.111951454 Predicted Change= -1.928187D-07  
 Zero-point correction (ZPE)= -685.0629 0.04895  
 Internal Energy (U)= -685.0580 0.05386  
 Enthalpy (H)= -685.0571 0.05481  
 Gibbs Free Energy (G)= -685.0924 0.01952  
 -----

Frequencies -- 230.3119 300.6384 400.7600

Supporting Information: **5chloro4radicalimidazole.out**

-----  
 Using Gaussian 03: IA32L-G03RevC.02 12-Jun-2004  
 =====

#opt nosymm freq ub3lyp/6-31g(d)  
 #N Geom=AllCheck Guess=Read SCRF=Check GenChk UB3LYP/6-31G(d) Freq  
 -----

Pointgroup= C1 Stoichiometry= C3H2ClN2(2) C1[X(C3H2ClN2)] #Atoms= 8  
 Charge = 0 Multiplicity = 2  
 -----

SCF Energy= -685.109339716 Predicted Change= -1.927668D-07  
 =====

Optimization completed. {Found 2 times}  
 Item Max Val. Criteria Pass? RMS Val. Criteria Pass?  
 Force 0.00018 || 0.00045 [ YES ] 0.00006 || 0.00030 [ YES ]  
 Displ 0.00095 || 0.00180 [ YES ] 0.00095 || 0.00180 [ YES ]  
 -----

Atomic Coordinates (Angstroms)  
 Type X Y Z  
 -----

|    |           |           |           |
|----|-----------|-----------|-----------|
| C  | 0.128609  | 2.199392  | 0.000173  |
| C  | -0.697047 | 0.247001  | -0.000270 |
| C  | 0.656342  | 0.052992  | 0.000020  |
| N  | 1.187216  | 1.336098  | -0.000039 |
| H  | 2.171214  | 1.570588  | -0.000066 |
| N  | -1.019913 | 1.539962  | 0.000182  |
| Cl | 1.656910  | -1.347044 | -0.000095 |
| H  | 0.249532  | 3.273889  | 0.000345  |

-----

## Statistical Thermodynamic Analysis

Temperature= 298.150 Kelvin Pressure= 1.00000 Atm  
 =====

SCF Energy= -685.109339716 Predicted Change= -1.927668D-07  
 Zero-point correction (ZPE)= -685.0600 0.04931  
 Internal Energy (U)= -685.0552 0.05410  
 Enthalpy (H)= -685.0542 0.05504  
 Gibbs Free Energy (G)= -685.0893 0.01996  
 -----

Frequencies -- 223.8103 305.7303 488.8453

Supporting Information: **5chloroimidazole.out**

-----  
 Using Gaussian 03: IA32L-G03RevC.02 12-Jun-2004  
 =====

# opt=(modredundant) freq b3lyp/6-31g(d) geom=connectivity  
 #N Geom=AllCheck Guess=Read SCRF=Check GenChk RB3LYP/6-31G(d) Freq  
 -----

Pointgroup= C1 Stoichiometry= C3H3ClN2 C1[X(C3H3ClN2)] #Atoms= 9  
 Charge = 0 Multiplicity = 1  
 -----

SCF Energy= -685.805641775 Predicted Change= -2.354376D-07  
 =====

Optimization completed. {Found 1 times}  
 Item Max Val. Criteria Pass? RMS Val. Criteria Pass?  
 Force 0.00020 || 0.00045 [ YES ] 0.00005 || 0.00030 [ YES ]  
 Displ 0.00196 || 0.00180 [ NO ] 0.00196 || 0.00180 [ YES ]  
 -----

Atomic Coordinates (Angstroms)  
 Type X Y Z  
 -----

|    |           |           |           |
|----|-----------|-----------|-----------|
| C  | 1.833526  | -0.616490 | 0.000184  |
| C  | 0.613868  | 1.150877  | 0.000077  |
| C  | -0.249931 | 0.086255  | -0.000017 |
| N  | 0.534302  | -1.046853 | -0.000006 |
| H  | 0.196879  | -1.998962 | -0.000150 |
| H  | 2.668082  | -1.304663 | 0.000272  |
| H  | 0.371364  | 2.203846  | 0.000093  |
| N  | 1.913556  | 0.695607  | 0.000094  |
| Cl | -1.973889 | -0.009726 | -0.000135 |

## Statistical Thermodynamic Analysis

Temperature= 298.150 Kelvin Pressure= 1.00000 Atm  
 =====

SCF Energy= -685.805641775 Predicted Change= -2.354376D-07  
 Zero-point correction (ZPE)= -685.7437 0.06190  
 Internal Energy (U)= -685.7388 0.06675  
 Enthalpy (H)= -685.7379 0.06769  
 Gibbs Free Energy (G)= -685.7725 0.03312  
 -----

Frequencies -- 227.7795 297.5440 485.5308

Supporting Information: **5chloroimidazol radical.out**

-----  
 Using Gaussian 03: IA32L-G03RevC.02 12-Jun-2004  
 =====

# opt nosymm freq ub3lyp/6-31g(d) geom=connectivity  
 #N Geom=AllCheck Guess=Read SCRF=Check GenChk UB3LYP/6-31G(d) Freq  
 -----

Pointgroup= C1 Stoichiometry= C3H3N2(2) C1[X(C3H3N2)] #Atoms= 8  
 Charge = 0 Multiplicity = 2  
 -----

SCF Energy= -225.515272502 Predicted Change= -2.702695D-07  
 =====

Optimization completed. {Found 2 times}  
 Item Max Val. Criteria Pass? RMS Val. Criteria Pass?  
 Force 0.00012 || 0.00045 [ YES ] 0.00004 || 0.00030 [ YES ]  
 Displ 0.00124 || 0.00180 [ YES ] 0.00124 || 0.00180 [ YES ]  
 -----

Atomic Coordinates (Angstroms)  
 Type X Y Z  
 -----

|   |           |           |           |
|---|-----------|-----------|-----------|
| C | 1.832216  | -0.625756 | 0.000422  |
| C | 0.602928  | 1.163479  | 0.000179  |
| C | -0.234662 | 0.084565  | 0.000232  |
| N | 0.532510  | -1.053481 | -0.000171 |
| H | 0.194121  | -2.004418 | -0.000355 |
| H | 2.675920  | -1.302741 | 0.000539  |
| H | 0.374101  | 2.217817  | 0.000162  |
| N | 1.904513  | 0.690152  | -0.000461 |

-----

## Statistical Thermodynamic Analysis

Temperature= 298.150 Kelvin Pressure= 1.00000 Atm  
 =====

SCF Energy= -225.515272502 Predicted Change= -2.702695D-07  
 Zero-point correction (ZPE)= -225.4568 0.05843  
 Internal Energy (U)= -225.4530 0.06223  
 Enthalpy (H)= -225.4520 0.06317  
 Gibbs Free Energy (G)= -225.4837 0.03155  
 -----

Frequencies -- 434.5255 556.1037 679.0587

**Chloroindoles**Supporting Information: **2chloroindole.out**-----  
Using Gaussian 03: IA32L-G03RevC.02 12-Jun-2004  
=====# opt freq ub3lyp/6-31g(d) geom=connectivity  
#N Geom=AllCheck Guess=Read SCRF=Check GenChk UB3LYP/6-31G(d) Freq  
-----Pointgroup= C1 Stoichiometry= C8H6ClN C1[X(C8H6ClN)] #Atoms= 16  
Charge = 0 Multiplicity = 1  
-----SCF Energy= -823.410044554 Predicted Change= -1.736856D-07  
=====Optimization completed. {Found 2 times}  
Item Max Val. Criteria Pass? RMS Val. Criteria Pass?  
Force 0.00010 || 0.00045 [ YES ] 0.00002 || 0.00030 [ YES ]  
Displ 0.00168 || 0.00180 [ YES ] 0.00168 || 0.00180 [ YES ]  
-----Atomic Coordinates (Angstroms)  
Type X Y Z  
-----

|    |           |           |           |
|----|-----------|-----------|-----------|
| C  | -0.583069 | -0.655039 | 0.000133  |
| C  | -0.618064 | 0.768039  | 0.000061  |
| C  | -1.867497 | 1.412320  | 0.000156  |
| C  | -3.023398 | 0.642239  | 0.000310  |
| C  | -2.962544 | -0.766015 | 0.000373  |
| C  | -1.743167 | -1.434455 | 0.000288  |
| C  | 1.525050  | 0.107686  | -0.000201 |
| C  | 0.743767  | 1.229728  | -0.000086 |
| H  | -1.925384 | 2.497557  | 0.000116  |
| H  | -3.993547 | 1.131441  | 0.000389  |
| H  | -3.884338 | -1.340980 | 0.000495  |
| H  | -1.695605 | -2.520155 | 0.000342  |
| H  | 1.097836  | 2.250153  | -0.000160 |
| N  | 0.747911  | -1.032363 | 0.000033  |
| H  | 1.107869  | -1.974173 | 0.000054  |
| Cl | 3.248902  | -0.037901 | -0.000451 |

-----  
Statistical Thermodynamic AnalysisTemperature= 298.150 Kelvin Pressure= 1.00000 Atm  
=====SCF Energy= -823.410044554 Predicted Change= -1.736856D-07  
Zero-point correction (ZPE)= -823.2897 0.12027  
Internal Energy (U)= -823.2821 0.12789  
Enthalpy (H)= -823.2812 0.12884  
Gibbs Free Energy (G)= -823.3224 0.08761  
-----

Frequencies -- 111.9603 214.1816 236.1486

Supporting Information: **2radicalindole.out**

-----  
 Using Gaussian 03: IA32L-G03RevC.02 12-Jun-2004  
 =====

# opt freq nosymm ub3lyp/6-31g(d) geom=connectivity  
 #N Geom=AllCheck Guess=Read SCRF=Check GenChk UB3LYP/6-31G(d) Freq  
 -----

Pointgroup= C1 Stoichiometry= C8H6N(2) C1[X(C8H6N)] #Atoms= 15  
 Charge = 0 Multiplicity = 2  
 -----

SCF Energy= -363.118737995 Predicted Change= -1.831472D-07  
 =====

Optimization completed. {Found 2 times}  
 Item Max Val. Criteria Pass? RMS Val. Criteria Pass?  
 Force 0.00012 || 0.00045 [ YES ] 0.00003 || 0.00030 [ YES ]  
 Displ 0.00133 || 0.00180 [ YES ] 0.00133 || 0.00180 [ YES ]  
 -----

Atomic Coordinates (Angstroms)  
 Type X Y Z  
 -----

|   |           |           |           |
|---|-----------|-----------|-----------|
| C | -0.584079 | -0.658436 | 0.000139  |
| C | -0.616475 | 0.765708  | 0.000064  |
| C | -1.864948 | 1.411065  | 0.000153  |
| C | -3.022199 | 0.641450  | 0.000311  |
| C | -2.963889 | -0.766326 | 0.000380  |
| C | -1.744559 | -1.436140 | 0.000295  |
| C | 1.504816  | 0.106768  | -0.000122 |
| C | 0.752960  | 1.239469  | -0.000096 |
| H | -1.921679 | 2.496404  | 0.000102  |
| H | -3.991656 | 1.132354  | 0.000383  |
| H | -3.886541 | -1.340032 | 0.000503  |
| H | -1.697891 | -2.522049 | 0.000347  |
| H | 1.095567  | 2.263391  | -0.000177 |
| N | 0.755877  | -1.037214 | 0.000020  |
| H | 1.110517  | -1.980430 | 0.000000  |

## Statistical Thermodynamic Analysis

Temperature= 298.150 Kelvin Pressure= 1.00000 Atm  
 =====

SCF Energy= -363.118737995 Predicted Change= -1.831472D-07  
 Zero-point correction (ZPE)= -363.0023 0.11637  
 Internal Energy (U)= -362.9955 0.12315  
 Enthalpy (H)= -362.9946 0.12410  
 Gibbs Free Energy (G)= -363.0345 0.08421  
 -----

Frequencies -- 52.1130 235.4841 254.3743

Supporting Information: **3chloroindole.out**

-----  
 Using Gaussian 03: IA32L-G03RevC.02 12-Jun-2004  
 =====

# opt freq ub3lyp/6-31g(d) geom=connectivity  
 #N Geom=AllCheck Guess=Read SCRF=Check GenChk UB3LYP/6-31G(d) Freq  
 -----

Pointgroup= C1 Stoichiometry= C8H6ClN C1[X(C8H6ClN)] #Atoms= 16  
 Charge = 0 Multiplicity = 1  
 -----

SCF Energy= -823.410015920 Predicted Change= -1.790552D-07  
 =====

Optimization completed. {Found 2 times}  
 Item Max Val. Criteria Pass? RMS Val. Criteria Pass?  
 Force 0.00014 || 0.00045 [ YES ] 0.00003 || 0.00030 [ YES ]  
 Displ 0.00095 || 0.00180 [ YES ] 0.00095 || 0.00180 [ YES ]  
 -----

Atomic Coordinates (Angstroms)  
 Type X Y Z  
 -----

|    |           |           |           |
|----|-----------|-----------|-----------|
| C  | 0.880954  | 0.910653  | 0.000058  |
| C  | 0.076623  | -0.262967 | 0.000000  |
| C  | 0.696123  | -1.523240 | 0.000086  |
| C  | 2.082505  | -1.584647 | 0.000221  |
| C  | 2.865588  | -0.410719 | 0.000271  |
| C  | 2.279012  | 0.848623  | 0.000192  |
| C  | -1.280308 | 1.563424  | -0.000307 |
| C  | -1.282506 | 0.193769  | -0.000112 |
| H  | 0.094785  | -2.427688 | 0.000058  |
| H  | 2.576599  | -2.552153 | 0.000297  |
| H  | 3.948946  | -0.492439 | 0.000382  |
| H  | 2.883764  | 1.751773  | 0.000238  |
| H  | -2.107211 | 2.257880  | -0.000487 |
| N  | 0.031563  | 1.999004  | -0.000030 |
| H  | 0.318853  | 2.965164  | 0.000001  |
| Cl | -2.696742 | -0.817938 | -0.000161 |

## Statistical Thermodynamic Analysis

Temperature= 298.150 Kelvin Pressure= 1.00000 Atm  
 =====

SCF Energy= -823.410015920 Predicted Change= -1.790552D-07  
 Zero-point correction (ZPE)= -823.2895 0.12050  
 Internal Energy (U)= -823.2819 0.12811  
 Enthalpy (H)= -823.2809 0.12905  
 Gibbs Free Energy (G)= -823.3221 0.08786  
 -----

Frequencies -- 139.6710 177.9220 221.1103



Supporting Information: **3radicalindole.out**

-----  
 Using Gaussian 03: IA32L-G03RevC.02 12-Jun-2004  
 =====

# opt freq nosymm ub3lyp/6-31g(d) geom=connectivity  
 #N Geom=AllCheck Guess=Read SCRF=Check GenChk UB3LYP/6-31G(d) Freq  
 -----

Pointgroup= C1 Stoichiometry= C8H6N(2) C1[X(C8H6N)] #Atoms= 15  
 Charge = 0 Multiplicity = 2  
 -----

SCF Energy= -363.118147752 Predicted Change= -1.227097D-07  
 =====

Optimization completed. {Found 2 times}  
 Item Max Val. Criteria Pass? RMS Val. Criteria Pass?  
 Force 0.00011 || 0.00045 [ YES ] 0.00002 || 0.00030 [ YES ]  
 Displ 0.00087 || 0.00180 [ YES ] 0.00087 || 0.00180 [ YES ]  
 -----

Atomic Coordinates (Angstroms)  
 Type X Y Z  
 -----

|   |           |           |           |
|---|-----------|-----------|-----------|
| C | 0.874904  | 0.909330  | 0.000044  |
| C | 0.068043  | -0.274485 | -0.000037 |
| C | 0.699419  | -1.530598 | 0.000058  |
| C | 2.085707  | -1.587465 | 0.000236  |
| C | 2.864777  | -0.411039 | 0.000318  |
| C | 2.273028  | 0.845732  | 0.000224  |
| C | -1.291624 | 1.567203  | -0.000186 |
| C | -1.271326 | 0.207363  | -0.000186 |
| H | 0.104135  | -2.439154 | 0.000001  |
| H | 2.583501  | -2.553178 | 0.000310  |
| H | 3.948480  | -0.488878 | 0.000442  |
| H | 2.875804  | 1.750816  | 0.000264  |
| H | -2.110336 | 2.271708  | -0.000289 |
| N | 0.031537  | 2.002694  | -0.000149 |
| H | 0.329241  | 2.966389  | -0.000182 |

## Statistical Thermodynamic Analysis

Temperature= 298.150 Kelvin Pressure= 1.00000 Atm  
 =====

SCF Energy= -363.118147752 Predicted Change= -1.227097D-07  
 Zero-point correction (ZPE)= -363.0010 0.11710  
 Internal Energy (U)= -362.9946 0.12350  
 Enthalpy (H)= -362.9936 0.12445  
 Gibbs Free Energy (G)= -363.0321 0.08603  
 -----

Frequencies -- 205.1792 222.4355 330.8809

Supporting Information: **4chloroindole.out**

-----  
 Using Gaussian 03: IA32L-G03RevC.02 12-Jun-2004  
 =====

# opt freq ub3lyp/6-31g(d) geom=connectivity  
 #N Geom=AllCheck Guess=Read SCRF=Check GenChk UB3LYP/6-31G(d) Freq  
 -----

Pointgroup= C1 Stoichiometry= C8H6ClN C1[X(C8H6ClN)] #Atoms= 16  
 Charge = 0 Multiplicity = 1  
 -----

SCF Energy= -823.413911542 Predicted Change= -1.576359D-07  
 =====

Optimization completed. {Found 2 times}  
 Item Max Val. Criteria Pass? RMS Val. Criteria Pass?  
 Force 0.00009 || 0.00045 [ YES ] 0.00002 || 0.00030 [ YES ]  
 Displ 0.00115 || 0.00180 [ YES ] 0.00115 || 0.00180 [ YES ]  
 -----

Atomic Coordinates (Angstroms)  
 Type X Y Z  
 -----

|    |           |           |           |
|----|-----------|-----------|-----------|
| C  | -1.325887 | 0.468304  | 0.000049  |
| C  | -0.216204 | -0.425580 | -0.000042 |
| C  | 1.070015  | 0.136943  | 0.000028  |
| C  | 1.240788  | 1.512496  | 0.000174  |
| C  | 0.117082  | 2.363456  | 0.000255  |
| C  | -1.177261 | 1.859203  | 0.000194  |
| C  | -2.107620 | -1.646673 | -0.000386 |
| C  | -0.742605 | -1.759005 | -0.000144 |
| H  | 2.242192  | 1.929207  | 0.000237  |
| H  | 0.273772  | 3.438222  | 0.000378  |
| H  | -2.038657 | 2.521282  | 0.000268  |
| H  | -0.173628 | -2.676996 | -0.000183 |
| N  | -2.464170 | -0.310784 | -0.000016 |
| H  | -3.409101 | 0.040123  | 0.000047  |
| H  | -2.868304 | -2.414776 | -0.000603 |
| Cl | 2.474886  | -0.924497 | -0.000047 |

-----

## Statistical Thermodynamic Analysis

Temperature= 298.150 Kelvin Pressure= 1.00000 Atm  
 =====

SCF Energy= -823.413911542 Predicted Change= -1.576359D-07  
 Zero-point correction (ZPE)= -823.2934 0.12044  
 Internal Energy (U)= -823.2859 0.12797  
 Enthalpy (H)= -823.2849 0.12891  
 Gibbs Free Energy (G)= -823.3259 0.08793  
 -----

Frequencies -- 151.5895 205.6940 219.5741

Supporting Information: **4radicalindole.out**

-----  
 Using Gaussian 03: AM64L-G03RevC.02 12-Jun-2004  
 =====

# opt freq nosymm ub3lyp/6-31g(d) geom=connectivity  
 #N Geom=AllCheck Guess=Read SCRF=Check GenChk UB3LYP/6-31G(d) Freq  
 -----

Pointgroup= C1 Stoichiometry= C8H6N(2) C1[X(C8H6N)] #Atoms= 15  
 Charge = 0 Multiplicity = 2  
 -----

SCF Energy= -363.128887763 Predicted Change= -7.747849D-08  
 =====

Optimization completed. {Found 2 times}  
 Item Max Val. Criteria Pass? RMS Val. Criteria Pass?  
 Force 0.00004 || 0.00045 [ YES ] 0.00001 || 0.00030 [ YES ]  
 Displ 0.00093 || 0.00180 [ YES ] 0.00093 || 0.00180 [ YES ]  
 -----

Atomic Coordinates (Angstroms)  
 Type X Y Z  
 -----

|   |           |           |           |
|---|-----------|-----------|-----------|
| C | -1.325475 | 0.463964  | 0.000065  |
| C | -0.211234 | -0.435846 | -0.000114 |
| C | 1.040027  | 0.164522  | -0.000069 |
| C | 1.256556  | 1.517206  | 0.000074  |
| C | 0.122366  | 2.370911  | 0.000262  |
| C | -1.168421 | 1.856557  | 0.000265  |
| C | -2.110834 | -1.652073 | -0.000545 |
| C | -0.746756 | -1.769158 | 0.000020  |
| H | 2.257040  | 1.941331  | 0.000127  |
| H | 0.270441  | 3.447906  | 0.000428  |
| H | -2.031184 | 2.517531  | 0.000410  |
| H | -0.183911 | -2.691627 | 0.000151  |
| N | -2.464520 | -0.314301 | -0.000021 |
| H | -3.409749 | 0.036396  | 0.000058  |
| H | -2.873935 | -2.417897 | -0.000855 |

## Statistical Thermodynamic Analysis

Temperature= 298.150 Kelvin Pressure= 1.00000 Atm  
 =====

SCF Energy= -363.128887763 Predicted Change= -7.747849D-08  
 Zero-point correction (ZPE)= -363.0118 0.11703  
 Internal Energy (U)= -363.0055 0.12333  
 Enthalpy (H)= -363.0046 0.12427  
 Gibbs Free Energy (G)= -363.0427 0.08609  
 -----

Frequencies -- 208.5000 244.9270 374.0774

Supporting Information: **5chloroindole.out**

-----  
 Using Gaussian 03: AM64L-G03RevC.02 12-Jun-2004  
 =====

# opt freq ub3lyp/6-31g(d) geom=connectivity  
 #N Geom=AllCheck Guess=Read SCRF=Check GenChk UB3LYP/6-31G(d) Freq  
 -----

Pointgroup= C1 Stoichiometry= C8H6ClN C1[X(C8H6ClN)] #Atoms= 16  
 Charge = 0 Multiplicity = 1  
 -----

SCF Energy= -823.413095974 Predicted Change= -1.741906D-07  
 =====

Optimization completed. {Found 2 times}  
 Item Max Val. Criteria Pass? RMS Val. Criteria Pass?  
 Force 0.00010 || 0.00045 [ YES ] 0.00002 || 0.00030 [ YES ]  
 Displ 0.00124 || 0.00180 [ YES ] 0.00124 || 0.00180 [ YES ]  
 -----

Atomic Coordinates (Angstroms)  
 Type X Y Z  
 -----

|    |           |           |           |
|----|-----------|-----------|-----------|
| C  | 1.240404  | 0.684172  | 0.000020  |
| C  | 0.864205  | -0.689067 | 0.000105  |
| C  | -0.501316 | -1.023625 | 0.000038  |
| C  | -1.426157 | 0.008371  | -0.000102 |
| C  | -1.048966 | 1.365157  | -0.000182 |
| C  | 0.295573  | 1.714766  | -0.000122 |
| C  | 3.117032  | -0.561520 | 0.000449  |
| C  | 2.078722  | -1.455368 | 0.000200  |
| H  | -0.828740 | -2.057977 | 0.000076  |
| H  | -1.815432 | 2.132150  | -0.000300 |
| H  | 0.593275  | 2.759852  | -0.000189 |
| H  | 2.167113  | -2.532833 | 0.000231  |
| N  | 2.619440  | 0.728224  | 0.000094  |
| H  | 3.177471  | 1.567562  | 0.000042  |
| H  | 4.184288  | -0.734335 | 0.000664  |
| Cl | -3.148884 | -0.381724 | -0.000213 |

## Statistical Thermodynamic Analysis

Temperature= 298.150 Kelvin Pressure= 1.00000 Atm  
 =====

SCF Energy= -823.413095974 Predicted Change= -1.741906D-07  
 Zero-point correction (ZPE)= -823.2927 0.12033  
 Internal Energy (U)= -823.2852 0.12788  
 Enthalpy (H)= -823.2842 0.12883  
 Gibbs Free Energy (G)= -823.3253 0.08779  
 -----

Frequencies -- 122.0614 225.9338 237.8757

Supporting Information: **5radicalindole.out**

-----  
 Using Gaussian 03: IA32L-G03RevC.02 12-Jun-2004  
 =====

# opt freq nosymm ub3lyp/6-31g(d) geom=connectivity  
 #N Geom=AllCheck Guess=Read SCRF=Check GenChk UB3LYP/6-31G(d) Freq  
 -----

Pointgroup= C1 Stoichiometry= C8H6N(2) C1[X(C8H6N)] #Atoms= 15  
 Charge = 0 Multiplicity = 2  
 -----

SCF Energy= -363.128783467 Predicted Change= -2.688301D-07  
 =====

Optimization completed. {Found 2 times}  
 Item Max Val. Criteria Pass? RMS Val. Criteria Pass?  
 Force 0.00015 || 0.00045 [ YES ] 0.00003 || 0.00030 [ YES ]  
 Displ 0.00087 || 0.00180 [ YES ] 0.00087 || 0.00180 [ YES ]  
 -----

Atomic Coordinates (Angstroms)  
 Type X Y Z  
 -----

|   |           |           |           |
|---|-----------|-----------|-----------|
| C | 1.232206  | 0.679250  | 0.000082  |
| C | 0.863773  | -0.698783 | 0.000098  |
| C | -0.511228 | -1.035207 | -0.000080 |
| C | -1.384236 | 0.020294  | -0.000244 |
| C | -1.059377 | 1.373098  | -0.000269 |
| C | 0.294267  | 1.718927  | -0.000091 |
| C | 3.116582  | -0.559573 | 0.000059  |
| C | 2.082191  | -1.458677 | 0.000499  |
| H | -0.839278 | -2.071654 | 0.000011  |
| H | -1.824153 | 2.144719  | -0.000379 |
| H | 0.604304  | 2.761564  | -0.000079 |
| H | 2.175896  | -2.535829 | 0.000756  |
| N | 2.613346  | 0.726941  | 0.000297  |
| H | 3.167888  | 1.568370  | 0.000378  |
| H | 4.184731  | -0.727910 | -0.000015 |

## Statistical Thermodynamic Analysis

Temperature= 298.150 Kelvin Pressure= 1.00000 Atm  
 =====

SCF Energy= -363.128783467 Predicted Change= -2.688301D-07  
 Zero-point correction (ZPE)= -363.0119 0.11687  
 Internal Energy (U)= -363.0055 0.12320  
 Enthalpy (H)= -363.0046 0.12414  
 Gibbs Free Energy (G)= -363.0428 0.08592  
 -----

Frequencies -- 215.5056 256.3762 360.8812

Supporting Information: **6chloroindole.out**

-----  
 Using Gaussian 03: IA32L-G03RevC.02 12-Jun-2004  
 =====

# opt freq ub3lyp/6-31g(d) geom=connectivity  
 #N Geom=AllCheck Guess=Read SCRF=Check GenChk UB3LYP/6-31G(d) Freq  
 -----

Pointgroup= C1 Stoichiometry= C8H6ClN C1[X(C8H6ClN)] #Atoms= 16  
 Charge = 0 Multiplicity = 1  
 -----

SCF Energy= -823.413147919 Predicted Change= -1.926833D-07  
 =====

Optimization completed. {Found 2 times}  
 Item Max Val. Criteria Pass? RMS Val. Criteria Pass?  
 Force 0.00010 || 0.00045 [ YES ] 0.00002 || 0.00030 [ YES ]  
 Displ 0.00132 || 0.00180 [ YES ] 0.00132 || 0.00180 [ YES ]  
 -----

Atomic Coordinates (Angstroms)  
 Type X Y Z  
 -----

|    |           |           |           |
|----|-----------|-----------|-----------|
| C  | -0.866762 | -0.606459 | 0.000060  |
| C  | -1.269640 | 0.759352  | 0.000146  |
| C  | -0.275353 | 1.752350  | 0.000069  |
| C  | 1.063006  | 1.383805  | -0.000080 |
| C  | 1.418109  | 0.021344  | -0.000154 |
| C  | 0.476197  | -0.997614 | -0.000090 |
| C  | -3.118385 | -0.535782 | 0.000504  |
| C  | -2.706076 | 0.769921  | 0.000255  |
| H  | -0.546686 | 2.804624  | 0.000109  |
| H  | 1.844145  | 2.136023  | -0.000152 |
| H  | 0.778396  | -2.039583 | -0.000160 |
| H  | -4.116017 | -0.952330 | 0.000727  |
| H  | -3.349039 | 1.639152  | 0.000295  |
| N  | -2.014194 | -1.370460 | 0.000139  |
| H  | -2.045468 | -2.377945 | 0.000084  |
| Cl | 3.129850  | -0.405778 | -0.000361 |

## Statistical Thermodynamic Analysis

Temperature= 298.150 Kelvin Pressure= 1.00000 Atm  
 =====

SCF Energy= -823.413147919 Predicted Change= -1.926833D-07  
 Zero-point correction (ZPE)= -823.2928 0.12034  
 Internal Energy (U)= -823.2852 0.12788  
 Enthalpy (H)= -823.2843 0.12883  
 Gibbs Free Energy (G)= -823.3253 0.08781  
 -----

Frequencies -- 121.2671 237.1976 239.0679

Supporting Information: **6radicalindole.out**

-----  
 Using Gaussian 03: IA32L-G03RevC.02 12-Jun-2004  
 =====

# opt freq nosymm ub3lyp/6-31g(d) geom=connectivity  
 #N Geom=AllCheck Guess=Read SCRF=Check GenChk UB3LYP/6-31G(d) Freq  
 -----

Pointgroup= C1 Stoichiometry= C8H6N(2) C1[X(C8H6N)] #Atoms= 15  
 Charge = 0 Multiplicity = 2  
 -----

SCF Energy= -363.128852988 Predicted Change= -7.560630D-08  
 =====

Optimization completed. {Found 2 times}  
 Item Max Val. Criteria Pass? RMS Val. Criteria Pass?  
 Force 0.00004 || 0.00045 [ YES ] 0.00001 || 0.00030 [ YES ]  
 Displ 0.00093 || 0.00180 [ YES ] 0.00093 || 0.00180 [ YES ]  
 -----

Atomic Coordinates (Angstroms)  
 Type X Y Z  
 -----

|   |           |           |           |
|---|-----------|-----------|-----------|
| C | -0.865788 | -0.617644 | 0.000044  |
| C | -1.260976 | 0.752822  | 0.000172  |
| C | -0.274355 | 1.755737  | 0.000142  |
| C | 1.073747  | 1.392256  | -0.000014 |
| C | 1.375901  | 0.034711  | -0.000152 |
| C | 0.486586  | -1.009385 | -0.000138 |
| C | -3.119247 | -0.533734 | 0.000658  |
| C | -2.699166 | 0.768613  | 0.000096  |
| H | -0.557842 | 2.805862  | 0.000168  |
| H | 1.852465  | 2.149748  | -0.000099 |
| H | 0.791297  | -2.053070 | -0.000260 |
| H | -4.119359 | -0.944537 | 0.000990  |
| H | -3.337662 | 1.641323  | -0.000002 |
| N | -2.018415 | -1.374591 | 0.000114  |
| H | -2.054954 | -2.381713 | 0.000035  |

## Statistical Thermodynamic Analysis

Temperature= 298.150 Kelvin Pressure= 1.00000 Atm  
 =====

SCF Energy= -363.128852988 Predicted Change= -7.560630D-08  
 Zero-point correction (ZPE)= -363.0119 0.11687  
 Internal Energy (U)= -363.0056 0.12318  
 Enthalpy (H)= -363.0047 0.12413  
 Gibbs Free Energy (G)= -363.0429 0.08592  
 -----

Frequencies -- 221.2608 246.8425 375.3729

Supporting Information: **7chloroindole.out**

-----  
 Using Gaussian 03: AM64L-G03RevC.02 12-Jun-2004  
 =====

# opt freq ub3lyp/6-31g(d) geom=connectivity  
 #N Geom=AllCheck Guess=Read SCRF=Check GenChk UB3LYP/6-31G(d) Freq  
 -----

Pointgroup= C1 Stoichiometry= C8H6ClN C1[X(C8H6ClN)] #Atoms= 16  
 Charge = 0 Multiplicity = 1  
 -----

SCF Energy= -823.414237784 Predicted Change= -1.871508D-07  
 =====

Optimization completed. {Found 2 times}  
 Item Max Val. Criteria Pass? RMS Val. Criteria Pass?  
 Force 0.00010 || 0.00045 [ YES ] 0.00002 || 0.00030 [ YES ]  
 Displ 0.00122 || 0.00180 [ YES ] 0.00122 || 0.00180 [ YES ]  
 -----

Atomic Coordinates (Angstroms)  
 Type X Y Z  
 -----

|    |           |           |           |
|----|-----------|-----------|-----------|
| C  | -0.245879 | -0.358296 | 0.000024  |
| C  | -1.391038 | 0.488341  | 0.000123  |
| C  | -1.206971 | 1.882218  | 0.000059  |
| C  | 0.083919  | 2.393250  | -0.000093 |
| C  | 1.212931  | 1.547901  | -0.000187 |
| C  | 1.046379  | 0.172008  | -0.000129 |
| C  | -2.067641 | -1.668621 | 0.000469  |
| C  | -2.535486 | -0.380916 | 0.000217  |
| H  | -2.064001 | 2.550031  | 0.000107  |
| H  | 0.239083  | 3.468339  | -0.000155 |
| H  | 2.214110  | 1.965545  | -0.000313 |
| H  | -3.574671 | -0.082421 | 0.000253  |
| N  | -0.684920 | -1.660236 | 0.000103  |
| H  | -0.083237 | -2.469366 | 0.000041  |
| H  | -2.606273 | -2.605879 | 0.000689  |
| Cl | 2.428950  | -0.921170 | -0.000249 |

-----

## Statistical Thermodynamic Analysis

Temperature= 298.150 Kelvin Pressure= 1.00000 Atm  
 =====

SCF Energy= -823.414237784 Predicted Change= -1.871508D-07  
 Zero-point correction (ZPE)= -823.2937 0.12049  
 Internal Energy (U)= -823.2862 0.12802  
 Enthalpy (H)= -823.2852 0.12896  
 Gibbs Free Energy (G)= -823.3262 0.08799  
 -----

Frequencies -- 150.5510 199.5415 212.6912



Supporting Information: **7radicalindole.out**

-----  
 Using Gaussian 03: IA32L-G03RevC.02 12-Jun-2004  
 =====

# opt freq nosymm ub3lyp/6-31g(d) geom=connectivity  
 #N Geom=AllCheck Guess=Read SCRF=Check GenChk UB3LYP/6-31G(d) Freq  
 -----

Pointgroup= C1 Stoichiometry= C8H6N(2) C1[X(C8H6N)] #Atoms= 15  
 Charge = 0 Multiplicity = 2  
 -----

SCF Energy= -363.128398140 Predicted Change= -2.263480D-07  
 =====

Optimization completed. {Found 2 times}  
 Item Max Val. Criteria Pass? RMS Val. Criteria Pass?  
 Force 0.00015 || 0.00045 [ YES ] 0.00003 || 0.00030 [ YES ]  
 Displ 0.00093 || 0.00180 [ YES ] 0.00093 || 0.00180 [ YES ]  
 -----

Atomic Coordinates (Angstroms)  
 Type X Y Z  
 -----

|   |           |           |           |
|---|-----------|-----------|-----------|
| C | -0.238683 | -0.369067 | 0.000110  |
| C | -1.388108 | 0.484015  | 0.000134  |
| C | -1.198901 | 1.879656  | -0.000039 |
| C | 0.087299  | 2.401146  | -0.000225 |
| C | 1.227376  | 1.553150  | -0.000228 |
| C | 1.021132  | 0.198830  | -0.000052 |
| C | -2.070279 | -1.673749 | 0.000053  |
| C | -2.533245 | -0.384026 | 0.000542  |
| H | -2.058279 | 2.545011  | 0.000047  |
| H | 0.235049  | 3.478205  | -0.000301 |
| H | 2.226210  | 1.981317  | -0.000308 |
| H | -3.572248 | -0.083531 | 0.000809  |
| N | -0.688401 | -1.672421 | 0.000318  |
| H | -0.097782 | -2.488868 | 0.000396  |
| H | -2.614836 | -2.607770 | -0.000047 |

## Statistical Thermodynamic Analysis

Temperature= 298.150 Kelvin Pressure= 1.00000 Atm  
 =====

SCF Energy= -363.128398140 Predicted Change= -2.263480D-07  
 Zero-point correction (ZPE)= -363.0113 0.11704  
 Internal Energy (U)= -363.0050 0.12335  
 Enthalpy (H)= -363.0040 0.12430  
 Gibbs Free Energy (G)= -363.0423 0.08607  
 -----

Frequencies -- 206.6559 245.2813 371.1939

**Chloroisoquinolines**Supporting Information: **1chloroisoquinoline.out**-----  
Using Gaussian 03: AM64L-G03RevC.02 12-Jun-2004  
=====# opt freq nosymm ub3lyp/6-31g(d) geom=connectivity  
#N Geom=AllCheck Guess=Read SCRF=Check GenChk UB3LYP/6-31G(d) Freq  
-----Pointgroup= C1 Stoichiometry= C9H6ClN C1[X(C9H6ClN)] #Atoms= 17  
Charge = 0 Multiplicity = 1  
-----SCF Energy= -861.526885066 Predicted Change= -6.723997D-07  
=====Optimization completed. {Found 2 times}  
Item Max Val. Criteria Pass? RMS Val. Criteria Pass?  
Force 0.00022 || 0.00045 [ YES ] 0.00006 || 0.00030 [ YES ]  
Displ 0.00108 || 0.00180 [ YES ] 0.00108 || 0.00180 [ YES ]  
-----Atomic Coordinates (Angstroms)  
Type X Y Z  
-----

|    |           |           |           |
|----|-----------|-----------|-----------|
| C  | -4.530520 | -0.939991 | 0.000290  |
| C  | -3.153295 | -0.931833 | 0.000124  |
| C  | -2.445950 | 0.296770  | 0.000247  |
| C  | -3.177606 | 1.528225  | 0.000547  |
| C  | -4.596539 | 1.481933  | 0.000712  |
| C  | -5.257453 | 0.274689  | 0.000587  |
| H  | -5.065329 | -1.885425 | 0.000191  |
| H  | -2.596278 | -1.861726 | -0.000104 |
| C  | -2.447295 | 2.745446  | 0.000667  |
| H  | -5.150246 | 2.417253  | 0.000944  |
| H  | -6.343707 | 0.249568  | 0.000715  |
| C  | -1.021647 | 0.423790  | 0.000098  |
| C  | -1.075907 | 2.704620  | 0.000499  |
| H  | -0.481279 | 3.614385  | 0.000585  |
| N  | -0.363268 | 1.543758  | 0.000216  |
| H  | -2.973550 | 3.695595  | 0.000894  |
| Cl | -0.037891 | -1.050149 | -0.000261 |

-----  
Statistical Thermodynamic AnalysisTemperature= 298.150 Kelvin Pressure= 1.00000 Atm  
=====SCF Energy= -861.526885066 Predicted Change= -6.723997D-07  
Zero-point correction (ZPE)= -861.4004 0.12642  
Internal Energy (U)= -861.3925 0.13430  
Enthalpy (H)= -861.3916 0.13524  
Gibbs Free Energy (G)= -861.4337 0.09314  
-----

Frequencies -- 107.4642 176.1705 224.7641

Supporting Information: **1radicalisoquinoline.out**

-----  
 Using Gaussian 03: IA32L-G03RevC.02 12-Jun-2004  
 =====

# opt freq nosymm ub3lyp/6-31g(d) geom=connectivity  
 #N Geom=AllCheck Guess=Read SCRF=Check GenChk UB3LYP/6-31G(d) Freq  
 -----

Pointgroup= C1 Stoichiometry= C9H6N(2) C1[X(C9H6N)] #Atoms= 16  
 Charge = 0 Multiplicity = 2  
 -----

SCF Energy= -401.252371420 Predicted Change= -1.203084D-06  
 =====

Optimization completed. {Found 2 times}  
 Item Max Val. Criteria Pass? RMS Val. Criteria Pass?  
 Force 0.00038 || 0.00045 [ YES ] 0.00008 || 0.00030 [ YES ]  
 Displ 0.00172 || 0.00180 [ YES ] 0.00172 || 0.00180 [ YES ]  
 -----

Atomic Coordinates (Angstroms)  
 Type X Y Z  
 -----

|   |           |           |           |
|---|-----------|-----------|-----------|
| C | -4.529881 | -0.946998 | 0.000288  |
| C | -3.151411 | -0.934465 | 0.000123  |
| C | -2.456618 | 0.297924  | 0.000252  |
| C | -3.182725 | 1.535883  | 0.000551  |
| C | -4.600358 | 1.483663  | 0.000714  |
| C | -5.254162 | 0.269474  | 0.000585  |
| H | -5.067806 | -1.890724 | 0.000190  |
| H | -2.579247 | -1.857489 | -0.000105 |
| C | -2.436772 | 2.751069  | 0.000670  |
| H | -5.163872 | 2.413616  | 0.000943  |
| H | -6.340566 | 0.242204  | 0.000711  |
| C | -1.044093 | 0.434647  | 0.000105  |
| C | -1.065196 | 2.715367  | 0.000497  |
| H | -0.462155 | 3.618705  | 0.000580  |
| N | -0.386018 | 1.520225  | 0.000211  |
| H | -2.958989 | 3.703955  | 0.000898  |

## Statistical Thermodynamic Analysis

Temperature= 298.150 Kelvin Pressure= 1.00000 Atm  
 =====

SCF Energy= -401.252371420 Predicted Change= -1.203084D-06  
 Zero-point correction (ZPE)= -401.1290 0.12328  
 Internal Energy (U)= -401.1224 0.12995  
 Enthalpy (H)= -401.1214 0.13089  
 Gibbs Free Energy (G)= -401.1608 0.09150  
 -----

Frequencies -- 173.2213 189.1379 364.0997

Supporting Information: **3chloroisoquinoline.out**

-----  
 Using Gaussian 03: AM64L-G03RevC.02 12-Jun-2004  
 =====

# opt freq nosymm ub3lyp/6-31g(d) geom=connectivity  
 #N Geom=AllCheck Guess=Read SCRF=Check GenChk UB3LYP/6-31G(d) Freq  
 -----

Pointgroup= C1 Stoichiometry= C9H6ClN C1[X(C9H6ClN)] #Atoms= 17  
 Charge = 0 Multiplicity = 1  
 -----

SCF Energy= -861.526510235 Predicted Change= -7.290932D-08  
 =====

Optimization completed. {Found 2 times}  
 Item Max Val. Criteria Pass? RMS Val. Criteria Pass?  
 Force 0.00006 || 0.00045 [ YES ] 0.00001 || 0.00030 [ YES ]  
 Displ 0.00026 || 0.00180 [ YES ] 0.00026 || 0.00180 [ YES ]  
 -----

Atomic Coordinates (Angstroms)  
 Type X Y Z  
 -----

|    |           |           |           |
|----|-----------|-----------|-----------|
| C  | -4.518208 | -0.943919 | 0.000284  |
| C  | -3.142653 | -0.918060 | 0.000123  |
| C  | -2.452879 | 0.322051  | 0.000257  |
| C  | -3.193308 | 1.544723  | 0.000557  |
| C  | -4.613261 | 1.486064  | 0.000717  |
| C  | -5.255352 | 0.268651  | 0.000583  |
| H  | -5.047907 | -1.892181 | 0.000181  |
| H  | -2.568403 | -1.841326 | -0.000107 |
| C  | -2.461635 | 2.758170  | 0.000678  |
| H  | -5.181052 | 2.412806  | 0.000946  |
| H  | -6.341299 | 0.230627  | 0.000706  |
| C  | -1.036919 | 0.416915  | 0.000104  |
| H  | -0.439787 | -0.495143 | -0.000129 |
| C  | -1.086706 | 2.689191  | 0.000500  |
| N  | -0.368165 | 1.553671  | 0.000221  |
| H  | -2.973286 | 3.714505  | 0.000905  |
| Cl | -0.152758 | 4.183791  | 0.000648  |

## Statistical Thermodynamic Analysis

Temperature= 298.150 Kelvin Pressure= 1.00000 Atm  
 =====

SCF Energy= -861.526510235 Predicted Change= -7.290932D-08  
 Zero-point correction (ZPE)= -861.4002 0.12628  
 Internal Energy (U)= -861.3923 0.13418  
 Enthalpy (H)= -861.3913 0.13513  
 Gibbs Free Energy (G)= -861.4335 0.09293  
 -----

Frequencies -- 95.6052 184.7121 222.4583

Supporting Information: **3radicalisoquinoline.out**

-----  
 Using Gaussian 03: IA32L-G03RevC.02 12-Jun-2004  
 =====

# opt freq nosymm ub3lyp/6-31g(d) geom=connectivity  
 #N Geom=AllCheck Guess=Read SCRF=Check GenChk UB3LYP/6-31G(d) Freq  
 -----

Pointgroup= C1 Stoichiometry= C9H6N(2) C1[X(C9H6N)] #Atoms= 16  
 Charge = 0 Multiplicity = 2  
 -----

SCF Energy= -401.248172555 Predicted Change= -1.541636D-06  
 =====

Optimization completed. {Found 2 times}  
 Item Max Val. Criteria Pass? RMS Val. Criteria Pass?  
 Force 0.00040 || 0.00045 [ YES ] 0.00009 || 0.00030 [ YES ]  
 Displ 0.00163 || 0.00180 [ YES ] 0.00163 || 0.00180 [ YES ]  
 -----

Atomic Coordinates (Angstroms)  
 Type X Y Z  
 -----

|   |           |           |           |
|---|-----------|-----------|-----------|
| C | -4.515681 | -0.943269 | 0.000284  |
| C | -3.141071 | -0.915970 | 0.000124  |
| C | -2.447581 | 0.324476  | 0.000256  |
| C | -3.191724 | 1.550695  | 0.000557  |
| C | -4.612263 | 1.486314  | 0.000716  |
| C | -5.253822 | 0.269094  | 0.000582  |
| H | -5.044080 | -1.892328 | 0.000182  |
| H | -2.567298 | -1.839626 | -0.000106 |
| C | -2.461233 | 2.773634  | 0.000682  |
| H | -5.181305 | 2.412419  | 0.000945  |
| H | -6.339933 | 0.230741  | 0.000705  |
| C | -1.030792 | 0.402267  | 0.000098  |
| H | -0.432529 | -0.508444 | -0.000131 |
| C | -1.095919 | 2.665043  | 0.000498  |
| N | -0.388431 | 1.562516  | 0.000222  |
| H | -2.977159 | 3.729181  | 0.000910  |

## Statistical Thermodynamic Analysis

Temperature= 298.150 Kelvin Pressure= 1.00000 Atm  
 =====

SCF Energy= -401.248172555 Predicted Change= -1.541636D-06  
 Zero-point correction (ZPE)= -401.1250 0.12315  
 Internal Energy (U)= -401.1183 0.12982  
 Enthalpy (H)= -401.1174 0.13077  
 Gibbs Free Energy (G)= -401.1567 0.09138  
 -----

Frequencies -- 177.1483 195.2897 364.0917

Supporting Information: **4chloroisoquinoline.out**

-----  
 Using Gaussian 03: AM64L-G03RevC.02 12-Jun-2004  
 =====

# opt freq nosymm ub3lyp/6-31g(d) geom=connectivity  
 #N Geom=AllCheck Guess=Read SCRF=Check GenChk UB3LYP/6-31G(d) Freq  
 -----

Pointgroup= C1 Stoichiometry= C9H6ClN C1[X(C9H6ClN)] #Atoms= 17  
 Charge = 0 Multiplicity = 1  
 -----

SCF Energy= -861.523304790 Predicted Change= -1.116558D-06  
 =====

Optimization completed. {Found 2 times}  
 Item Max Val. Criteria Pass? RMS Val. Criteria Pass?  
 Force 0.00030 || 0.00045 [ YES ] 0.00007 || 0.00030 [ YES ]  
 Displ 0.00111 || 0.00180 [ YES ] 0.00111 || 0.00180 [ YES ]  
 -----

Atomic Coordinates (Angstroms)  
 Type X Y Z  
 -----

|    |           |           |           |
|----|-----------|-----------|-----------|
| C  | -4.522296 | -0.945991 | 0.000287  |
| C  | -3.146509 | -0.911647 | 0.000126  |
| C  | -2.459127 | 0.328997  | 0.000257  |
| C  | -3.207844 | 1.548503  | 0.000557  |
| C  | -4.624721 | 1.484198  | 0.000718  |
| C  | -5.261310 | 0.262149  | 0.000584  |
| H  | -5.046466 | -1.897314 | 0.000185  |
| H  | -2.566876 | -1.831461 | -0.000103 |
| C  | -2.438661 | 2.745590  | 0.000669  |
| H  | -5.197416 | 2.404900  | 0.000946  |
| H  | -6.347138 | 0.223179  | 0.000709  |
| C  | -1.040035 | 0.408719  | 0.000099  |
| C  | -1.063168 | 2.697378  | 0.000494  |
| H  | -0.482077 | 3.615223  | 0.000581  |
| N  | -0.359952 | 1.534901  | 0.000209  |
| H  | -0.459754 | -0.514741 | -0.000131 |
| Cl | -3.232527 | 4.313539  | 0.001034  |

-----

## Statistical Thermodynamic Analysis

Temperature= 298.150 Kelvin Pressure= 1.00000 Atm  
 =====

SCF Energy= -861.523304790 Predicted Change= -1.116558D-06  
 Zero-point correction (ZPE)= -861.3967 0.12656  
 Internal Energy (U)= -861.3888 0.13445  
 Enthalpy (H)= -861.3879 0.13540  
 Gibbs Free Energy (G)= -861.4300 0.09329  
 -----

Frequencies -- 121.1852 175.4206 211.3516

Supporting Information: **4radicalisoquinoline.out**

-----  
 Using Gaussian 03: AM64L-G03RevC.02 12-Jun-2004  
 =====

# opt freq nosymm ub3lyp/6-31g(d) geom=connectivity  
 #N Geom=AllCheck Guess=Read SCRF=Check GenChk UB3LYP/6-31G(d) Freq  
 -----

Pointgroup= C1 Stoichiometry= C9H6N(2) C1[X(C9H6N)] #Atoms= 16  
 Charge = 0 Multiplicity = 2  
 -----

SCF Energy= -401.241016200 Predicted Change= -1.030242D-07  
 =====

Optimization completed. {Found 2 times}  
 Item Max Val. Criteria Pass? RMS Val. Criteria Pass?  
 Force 0.00010 || 0.00045 [ YES ] 0.00002 || 0.00030 [ YES ]  
 Displ 0.00027 || 0.00180 [ YES ] 0.00027 || 0.00180 [ YES ]  
 -----

Atomic Coordinates (Angstroms)  
 Type X Y Z  
 -----

|   |           |           |           |
|---|-----------|-----------|-----------|
| C | -4.527753 | -0.945564 | 0.000288  |
| C | -3.150876 | -0.922930 | 0.000124  |
| C | -2.456553 | 0.313293  | 0.000254  |
| C | -3.206346 | 1.539886  | 0.000554  |
| C | -4.625669 | 1.484172  | 0.000717  |
| C | -5.266055 | 0.264953  | 0.000586  |
| H | -5.057147 | -1.894180 | 0.000187  |
| H | -2.580147 | -1.848664 | -0.000105 |
| C | -2.426392 | 2.704176  | 0.000659  |
| H | -5.188625 | 2.412514  | 0.000946  |
| H | -6.351913 | 0.225380  | 0.000711  |
| C | -1.035999 | 0.415398  | 0.000100  |
| C | -1.066951 | 2.724060  | 0.000500  |
| H | -0.477589 | 3.636265  | 0.000584  |
| N | -0.361235 | 1.544644  | 0.000212  |
| H | -0.444099 | -0.500819 | -0.000130 |

## Statistical Thermodynamic Analysis

Temperature= 298.150 Kelvin Pressure= 1.00000 Atm  
 =====

SCF Energy= -401.241016200 Predicted Change= -1.030242D-07  
 Zero-point correction (ZPE)= -401.1177 0.12321  
 Internal Energy (U)= -401.1111 0.12987  
 Enthalpy (H)= -401.1101 0.13081  
 Gibbs Free Energy (G)= -401.1495 0.09142  
 -----

Frequencies -- 171.8528 189.0968 356.3176

Supporting Information: **5chloroisoquinoline.out**

-----  
 Using Gaussian 03: AM64L-G03RevC.02 12-Jun-2004  
 =====

# opt freq nosymm ub3lyp/6-31g(d) geom=connectivity  
 #N Geom=AllCheck Guess=Read SCRF=Check GenChk UB3LYP/6-31G(d) Freq  
 -----

Pointgroup= C1 Stoichiometry= C9H6ClN C1[X(C9H6ClN)] #Atoms= 17  
 Charge = 0 Multiplicity = 1  
 -----

SCF Energy= -861.523324508 Predicted Change= -9.768408D-07  
 =====

Optimization completed. {Found 2 times}  
 Item Max Val. Criteria Pass? RMS Val. Criteria Pass?  
 Force 0.00025 || 0.00045 [ YES ] 0.00007 || 0.00030 [ YES ]  
 Displ 0.00086 || 0.00180 [ YES ] 0.00086 || 0.00180 [ YES ]  
 -----

Atomic Coordinates (Angstroms)  
 Type X Y Z  
 -----

|    |           |           |           |
|----|-----------|-----------|-----------|
| C  | -4.521044 | -0.939361 | 0.000288  |
| C  | -3.145547 | -0.911395 | 0.000127  |
| C  | -2.460588 | 0.329094  | 0.000258  |
| C  | -3.188428 | 1.560364  | 0.000557  |
| C  | -4.609769 | 1.479508  | 0.000716  |
| C  | -5.261468 | 0.266732  | 0.000585  |
| H  | -5.054646 | -1.885197 | 0.000188  |
| H  | -2.569440 | -1.832998 | -0.000103 |
| C  | -2.433466 | 2.760800  | 0.000671  |
| H  | -6.346011 | 0.240577  | 0.000711  |
| C  | -1.039066 | 0.408517  | 0.000099  |
| C  | -1.059685 | 2.691977  | 0.000492  |
| H  | -0.463697 | 3.601634  | 0.000576  |
| N  | -0.350587 | 1.528879  | 0.000207  |
| H  | -2.936578 | 3.721034  | 0.000898  |
| H  | -0.465962 | -0.520092 | -0.000131 |
| Cl | -5.566286 | 2.955765  | 0.001088  |

-----

## Statistical Thermodynamic Analysis

Temperature= 298.150 Kelvin Pressure= 1.00000 Atm  
 =====

SCF Energy= -861.523324508 Predicted Change= -9.768408D-07  
 Zero-point correction (ZPE)= -861.3967 0.12655  
 Internal Energy (U)= -861.3888 0.13444  
 Enthalpy (H)= -861.3879 0.13538  
 Gibbs Free Energy (G)= -861.4300 0.09328  
 -----

Frequencies -- 120.7945 175.2577 215.2892



Supporting Information: **5radicalisoquinoline.out**

-----  
 Using Gaussian 03: AM64L-G03RevC.02 12-Jun-2004  
 =====

# opt freq nosymm ub3lyp/6-31g(d) geom=connectivity  
 #N Geom=AllCheck Guess=Read SCRF=Check GenChk UB3LYP/6-31G(d) Freq  
 -----

Pointgroup= C1 Stoichiometry= C9H6N(2) C1[X(C9H6N)] #Atoms= 16  
 Charge = 0 Multiplicity = 2  
 -----

SCF Energy= -401.240699530 Predicted Change= -2.819828D-07  
 =====

Optimization completed. {Found 2 times}  
 Item Max Val. Criteria Pass? RMS Val. Criteria Pass?  
 Force 0.00015 || 0.00045 [ YES ] 0.00004 || 0.00030 [ YES ]  
 Displ 0.00062 || 0.00180 [ YES ] 0.00062 || 0.00180 [ YES ]  
 -----

Atomic Coordinates (Angstroms)  
 Type X Y Z  
 -----

|   |           |           |           |
|---|-----------|-----------|-----------|
| C | -4.530632 | -0.940828 | 0.000289  |
| C | -3.153584 | -0.911922 | 0.000128  |
| C | -2.450625 | 0.322007  | 0.000255  |
| C | -3.179734 | 1.559944  | 0.000555  |
| C | -4.576311 | 1.440480  | 0.000703  |
| C | -5.276860 | 0.275880  | 0.000588  |
| H | -5.061469 | -1.889360 | 0.000190  |
| H | -2.584250 | -1.838030 | -0.000102 |
| C | -2.432882 | 2.766169  | 0.000672  |
| H | -6.363553 | 0.252323  | 0.000715  |
| C | -1.030352 | 0.409571  | 0.000097  |
| C | -1.059004 | 2.699951  | 0.000494  |
| H | -0.461973 | 3.609100  | 0.000578  |
| N | -0.349728 | 1.536204  | 0.000208  |
| H | -2.946537 | 3.722382  | 0.000900  |
| H | -0.448487 | -0.513798 | -0.000132 |

## Statistical Thermodynamic Analysis

Temperature= 298.150 Kelvin Pressure= 1.00000 Atm  
 =====

SCF Energy= -401.240699530 Predicted Change= -2.819828D-07  
 Zero-point correction (ZPE)= -401.1175 0.12310  
 Internal Energy (U)= -401.1109 0.12976  
 Enthalpy (H)= -401.1099 0.13071  
 Gibbs Free Energy (G)= -401.1493 0.09131  
 -----

Frequencies -- 170.9064 190.3021 357.4951

Supporting Information: **6chloroisoquinoline.out**

-----  
 Using Gaussian 03: AM64L-G03RevC.02 12-Jun-2004  
 =====

# opt freq nosymm ub3lyp/6-31g(d) geom=connectivity  
 #N Geom=AllCheck Guess=Read SCRF=Check GenChk UB3LYP/6-31G(d) Freq  
 -----

Pointgroup= C1 Stoichiometry= C9H6ClN C1[X(C9H6ClN)] #Atoms= 17  
 Charge = 0 Multiplicity = 1  
 -----

SCF Energy= -861.524490016 Predicted Change= -8.361025D-07  
 =====

Optimization completed. {Found 2 times}  
 Item Max Val. Criteria Pass? RMS Val. Criteria Pass?  
 Force 0.00031 || 0.00045 [ YES ] 0.00006 || 0.00030 [ YES ]  
 Displ 0.00091 || 0.00180 [ YES ] 0.00091 || 0.00180 [ YES ]  
 -----

Atomic Coordinates (Angstroms)  
 Type X Y Z  
 -----

|    |           |           |           |
|----|-----------|-----------|-----------|
| C  | -4.524290 | -0.945191 | 0.000288  |
| C  | -3.149010 | -0.914277 | 0.000127  |
| C  | -2.452882 | 0.321117  | 0.000255  |
| C  | -3.191183 | 1.542868  | 0.000554  |
| C  | -4.609750 | 1.496533  | 0.000718  |
| C  | -5.243503 | 0.275641  | 0.000585  |
| H  | -5.066417 | -1.884421 | 0.000191  |
| H  | -2.583488 | -1.842827 | -0.000103 |
| C  | -2.446248 | 2.751009  | 0.000671  |
| H  | -5.184023 | 2.417316  | 0.000946  |
| C  | -1.033588 | 0.406806  | 0.000097  |
| C  | -1.072021 | 2.694214  | 0.000494  |
| H  | -0.481128 | 3.607380  | 0.000579  |
| N  | -0.355151 | 1.535057  | 0.000208  |
| H  | -2.960765 | 3.708059  | 0.000900  |
| H  | -0.450463 | -0.515655 | -0.000133 |
| Cl | -6.998756 | 0.207451  | 0.000784  |

-----

## Statistical Thermodynamic Analysis

Temperature= 298.150 Kelvin Pressure= 1.00000 Atm  
 =====

SCF Energy= -861.524490016 Predicted Change= -8.361025D-07  
 Zero-point correction (ZPE)= -861.3980 0.12639  
 Internal Energy (U)= -861.3901 0.13430  
 Enthalpy (H)= -861.3892 0.13525  
 Gibbs Free Energy (G)= -861.4314 0.09304  
 -----

Frequencies -- 101.0425 184.8573 218.4319

Supporting Information: **6radicalisoquinoline.out**

-----  
 Using Gaussian 03: AM64L-G03RevC.02 12-Jun-2004  
 =====

# opt freq nosymm ub3lyp/6-31g(d) geom=connectivity  
 #N Geom=AllCheck Guess=Read SCRF=Check GenChk UB3LYP/6-31G(d) Freq  
 -----

Pointgroup= C1 Stoichiometry= C9H6N(2) C1[X(C9H6N)] #Atoms= 16  
 Charge = 0 Multiplicity = 2  
 -----

SCF Energy= -401.241566479 Predicted Change= -7.053898D-08  
 =====

Optimization completed. {Found 2 times}  
 Item Max Val. Criteria Pass? RMS Val. Criteria Pass?  
 Force 0.00006 || 0.00045 [ YES ] 0.00002 || 0.00030 [ YES ]  
 Displ 0.00038 || 0.00180 [ YES ] 0.00038 || 0.00180 [ YES ]  
 -----

Atomic Coordinates (Angstroms)  
 Type X Y Z  
 -----

|   |           |           |           |
|---|-----------|-----------|-----------|
| C | -4.531938 | -0.957262 | 0.000286  |
| C | -3.149457 | -0.919644 | 0.000126  |
| C | -2.462162 | 0.323552  | 0.000257  |
| C | -3.193999 | 1.552937  | 0.000556  |
| C | -4.622703 | 1.504734  | 0.000722  |
| C | -5.196543 | 0.273246  | 0.000579  |
| H | -5.070894 | -1.900350 | 0.000188  |
| H | -2.573366 | -1.842788 | -0.000104 |
| C | -2.443767 | 2.756418  | 0.000672  |
| H | -5.199365 | 2.426534  | 0.000951  |
| C | -1.042052 | 0.406980  | 0.000099  |
| C | -1.069171 | 2.693611  | 0.000493  |
| H | -0.474810 | 3.604798  | 0.000577  |
| N | -0.357967 | 1.532110  | 0.000208  |
| H | -2.953794 | 3.715964  | 0.000899  |
| H | -0.461921 | -0.517211 | -0.000131 |

-----

## Statistical Thermodynamic Analysis

Temperature= 298.150 Kelvin Pressure= 1.00000 Atm  
 =====

SCF Energy= -401.241566479 Predicted Change= -7.053898D-08  
 Zero-point correction (ZPE)= -401.1186 0.12295  
 Internal Energy (U)= -401.1119 0.12962  
 Enthalpy (H)= -401.1109 0.13056  
 Gibbs Free Energy (G)= -401.1503 0.09118  
 -----

Frequencies -- 176.3576 194.2247 363.7631

Supporting Information: **7chloroisoquinoline.out**

-----  
 Using Gaussian 03: AM64L-G03RevC.02 12-Jun-2004  
 =====

# opt freq nosymm ub3lyp/6-31g(d) geom=connectivity  
 #N Geom=AllCheck Guess=Read SCRF=Check GenChk UB3LYP/6-31G(d) Freq  
 -----

Pointgroup= C1 Stoichiometry= C9H6ClN C1[X(C9H6ClN)] #Atoms= 17  
 Charge = 0 Multiplicity = 1  
 -----

SCF Energy= -861.524186941 Predicted Change= -8.121701D-07  
 =====

Optimization completed. {Found 2 times}  
 Item Max Val. Criteria Pass? RMS Val. Criteria Pass?  
 Force 0.00029 || 0.00045 [ YES ] 0.00006 || 0.00030 [ YES ]  
 Displ 0.00089 || 0.00180 [ YES ] 0.00089 || 0.00180 [ YES ]  
 -----

Atomic Coordinates (Angstroms)  
 Type X Y Z  
 -----

|    |           |           |           |
|----|-----------|-----------|-----------|
| C  | -4.514563 | -0.928595 | 0.000289  |
| C  | -3.139931 | -0.920540 | 0.000124  |
| C  | -2.454655 | 0.320692  | 0.000255  |
| C  | -3.190514 | 1.543582  | 0.000554  |
| C  | -4.609325 | 1.485322  | 0.000716  |
| C  | -5.262908 | 0.274445  | 0.000587  |
| H  | -2.579506 | -1.850225 | -0.000105 |
| C  | -2.446029 | 2.750671  | 0.000671  |
| H  | -5.179854 | 2.410400  | 0.000944  |
| H  | -6.346517 | 0.225602  | 0.000709  |
| C  | -1.033528 | 0.405990  | 0.000098  |
| C  | -1.071570 | 2.695263  | 0.000494  |
| H  | -0.479470 | 3.607498  | 0.000579  |
| N  | -0.357186 | 1.534742  | 0.000209  |
| H  | -2.961368 | 3.707460  | 0.000899  |
| H  | -0.450151 | -0.516075 | -0.000132 |
| Cl | -5.384058 | -2.456039 | 0.000130  |

-----

## Statistical Thermodynamic Analysis

Temperature= 298.150 Kelvin Pressure= 1.00000 Atm  
 =====

SCF Energy= -861.524186941 Predicted Change= -8.121701D-07  
 Zero-point correction (ZPE)= -861.3977 0.12638  
 Internal Energy (U)= -861.3898 0.13430  
 Enthalpy (H)= -861.3889 0.13524  
 Gibbs Free Energy (G)= -861.4311 0.09303  
 -----

Frequencies -- 102.9300 183.8936 216.2890

Supporting Information: **7radicalisoquinoline.out**

-----  
 Using Gaussian 03: AM64L-G03RevC.02 12-Jun-2004  
 =====

# opt freq nosymm ub3lyp/6-31g(d) geom=connectivity  
 #N Geom=AllCheck Guess=Read SCRF=Check GenChk UB3LYP/6-31G(d) Freq  
 -----

Pointgroup= C1 Stoichiometry= C9H6N(2) C1[X(C9H6N)] #Atoms= 16  
 Charge = 0 Multiplicity = 2  
 -----

SCF Energy= -401.241186074 Predicted Change= -7.857459D-08  
 =====

Optimization completed. {Found 2 times}  
 Item Max Val. Criteria Pass? RMS Val. Criteria Pass?  
 Force 0.00007 || 0.00045 [ YES ] 0.00002 || 0.00030 [ YES ]  
 Displ 0.00034 || 0.00180 [ YES ] 0.00034 || 0.00180 [ YES ]  
 -----

Atomic Coordinates (Angstroms)  
 Type X Y Z  
 -----

|   |           |           |           |
|---|-----------|-----------|-----------|
| C | -4.495360 | -0.886550 | 0.000295  |
| C | -3.138061 | -0.936186 | 0.000121  |
| C | -2.446677 | 0.313483  | 0.000252  |
| C | -3.192186 | 1.534090  | 0.000552  |
| C | -4.613615 | 1.488189  | 0.000716  |
| C | -5.276263 | 0.273848  | 0.000588  |
| H | -2.577167 | -1.867996 | -0.000108 |
| C | -2.449432 | 2.743275  | 0.000670  |
| H | -5.174484 | 2.420291  | 0.000945  |
| H | -6.361971 | 0.229833  | 0.000712  |
| C | -1.026969 | 0.405822  | 0.000096  |
| C | -1.074662 | 2.694660  | 0.000495  |
| H | -0.487462 | 3.610182  | 0.000582  |
| N | -0.355479 | 1.538169  | 0.000209  |
| H | -2.967538 | 3.698739  | 0.000898  |
| H | -0.439748 | -0.513617 | -0.000133 |

## Statistical Thermodynamic Analysis

Temperature= 298.150 Kelvin Pressure= 1.00000 Atm  
 =====

SCF Energy= -401.241186074 Predicted Change= -7.857459D-08  
 Zero-point correction (ZPE)= -401.1182 0.12296  
 Internal Energy (U)= -401.1115 0.12963  
 Enthalpy (H)= -401.1106 0.13057  
 Gibbs Free Energy (G)= -401.1499 0.09119  
 -----

Frequencies -- 176.1132 194.7521 362.8604

Supporting Information: **8chloroisoquinoline.out**

-----  
 Using Gaussian 03: AM64L-G03RevC.02 12-Jun-2004  
 =====

# opt freq nosymm ub3lyp/6-31g(d) geom=connectivity  
 #N Geom=AllCheck Guess=Read SCRF=Check GenChk UB3LYP/6-31G(d) Freq  
 -----

Pointgroup= C1 Stoichiometry= C9H6ClN C1[X(C9H6ClN)] #Atoms= 17  
 Charge = 0 Multiplicity = 1  
 -----

SCF Energy= -861.522432409 Predicted Change= -7.313924D-07  
 =====

Optimization completed. {Found 2 times}  
 Item Max Val. Criteria Pass? RMS Val. Criteria Pass?  
 Force 0.00026 || 0.00045 [ YES ] 0.00006 || 0.00030 [ YES ]  
 Displ 0.00121 || 0.00180 [ YES ] 0.00121 || 0.00180 [ YES ]  
 -----

Atomic Coordinates (Angstroms)  
 Type X Y Z  
 -----

|    |           |           |           |
|----|-----------|-----------|-----------|
| C  | -4.531540 | -0.940096 | 0.000289  |
| C  | -3.155733 | -0.915435 | 0.000126  |
| C  | -2.433960 | 0.311034  | 0.000251  |
| C  | -3.184200 | 1.530119  | 0.000550  |
| C  | -4.602602 | 1.486020  | 0.000715  |
| C  | -5.255993 | 0.275658  | 0.000586  |
| H  | -5.054914 | -1.889968 | 0.000188  |
| C  | -2.447929 | 2.743010  | 0.000670  |
| H  | -5.160183 | 2.418525  | 0.000944  |
| H  | -6.341672 | 0.238845  | 0.000711  |
| C  | -1.013583 | 0.412844  | 0.000097  |
| C  | -1.074449 | 2.703801  | 0.000496  |
| H  | -0.491758 | 3.622221  | 0.000583  |
| N  | -0.350706 | 1.551008  | 0.000211  |
| H  | -2.975753 | 3.692894  | 0.000898  |
| H  | -0.417578 | -0.496626 | -0.000132 |
| Cl | -2.289439 | -2.447157 | -0.000243 |

-----

## Statistical Thermodynamic Analysis

Temperature= 298.150 Kelvin Pressure= 1.00000 Atm  
 =====

SCF Energy= -861.522432409 Predicted Change= -7.313924D-07  
 Zero-point correction (ZPE)= -861.3959 0.12650  
 Internal Energy (U)= -861.3880 0.13440  
 Enthalpy (H)= -861.3870 0.13534  
 Gibbs Free Energy (G)= -861.4292 0.09322  
 -----

Frequencies -- 118.8141 175.4623 216.4568

Supporting Information: **8radicalisoquinoline.out**

-----  
 Using Gaussian 03: AM64L-G03RevC.02 12-Jun-2004  
 =====

# opt freq nosymm ub3lyp/6-31g(d) geom=connectivity  
 #N Geom=AllCheck Guess=Read SCRF=Check GenChk UB3LYP/6-31G(d) Freq  
 -----

Pointgroup= C1 Stoichiometry= C9H6N(2) C1[X(C9H6N)] #Atoms= 16  
 Charge = 0 Multiplicity = 2  
 -----

SCF Energy= -401.240834944 Predicted Change= -2.225287D-07  
 =====

Optimization completed. {Found 2 times}  
 Item Max Val. Criteria Pass? RMS Val. Criteria Pass?  
 Force 0.00014 || 0.00045 [ YES ] 0.00003 || 0.00030 [ YES ]  
 Displ 0.00049 || 0.00180 [ YES ] 0.00049 || 0.00180 [ YES ]  
 -----

Atomic Coordinates (Angstroms)  
 Type X Y Z  
 -----

|   |           |           |           |
|---|-----------|-----------|-----------|
| C | -4.528495 | -0.959884 | 0.000285  |
| C | -3.173009 | -0.865154 | 0.000138  |
| C | -2.432662 | 0.322450  | 0.000253  |
| C | -3.187409 | 1.545427  | 0.000554  |
| C | -4.607347 | 1.479327  | 0.000715  |
| C | -5.259942 | 0.265606  | 0.000584  |
| H | -5.050117 | -1.913026 | 0.000183  |
| C | -2.442175 | 2.752418  | 0.000671  |
| H | -5.174923 | 2.406168  | 0.000943  |
| H | -6.346745 | 0.231334  | 0.000710  |
| C | -1.011844 | 0.411942  | 0.000096  |
| C | -1.067318 | 2.701369  | 0.000495  |
| H | -0.480867 | 3.617492  | 0.000581  |
| N | -0.344156 | 1.546431  | 0.000209  |
| H | -2.958712 | 3.708855  | 0.000899  |
| H | -0.426832 | -0.506900 | -0.000133 |

## Statistical Thermodynamic Analysis

Temperature= 298.150 Kelvin Pressure= 1.00000 Atm  
 =====

SCF Energy= -401.240834944 Predicted Change= -2.225287D-07  
 Zero-point correction (ZPE)= -401.1177 0.12309  
 Internal Energy (U)= -401.1110 0.12975  
 Enthalpy (H)= -401.1101 0.13070  
 Gibbs Free Energy (G)= -401.1495 0.09130  
 -----

Frequencies -- 171.4010 189.1594 358.4107

**Chloroisothiazoles**Supporting Information: **35dichloroisothiazole.out**-----  
Using Gaussian 03: IA32L-G03RevC.02 12-Jun-2004  
=====

# opt freq ub3lyp/6-31g(d)

#N Geom=AllCheck Guess=Read SCRF=Check GenChk UB3LYP/6-31G(d) Freq  
-----

Pointgroup= C1 Stoichiometry= C3HCl2NS C1[X(C3HCl2NS)] #Atoms= 8

Charge = 0 Multiplicity = 1  
-----SCF Energy= -1488.22382227 Predicted Change= -4.149773D-07  
=====

Optimization completed. {Found 2 times}

Item Max Val. Criteria Pass? RMS Val. Criteria Pass?

Force 0.00026 || 0.00045 [ YES ] 0.00008 || 0.00030 [ YES ]

Displ 0.00109 || 0.00180 [ YES ] 0.00109 || 0.00180 [ YES ]  
-----

Atomic Coordinates (Angstroms)

Type X Y Z  
-----

C 1.198684 -0.026305 0.000159

C 0.094551 -0.930741 0.000184

C -1.062785 -0.202817 -0.000023

S -0.699247 1.495648 0.000344

H 0.168041 -2.009349 0.000199

N 0.964296 1.259814 -0.000242

Cl 2.847459 -0.592852 -0.000166

Cl -2.677627 -0.806003 -0.000183  
-----

Statistical Thermodynamic Analysis

Temperature= 298.150 Kelvin Pressure= 1.00000 Atm  
=====

SCF Energy= -1488.22382227 Predicted Change= -4.149773D-07

Zero-point correction (ZPE)= -1488.1875 0.03632

Internal Energy (U)= -1488.1813 0.04251

Enthalpy (H)= -1488.1803 0.04345

Gibbs Free Energy (G)= -1488.2192 0.00456  
-----

Frequencies -- 156.8884 189.2987 275.2450



Supporting Information: **3chloro5radicalisothiazole.out**

-----  
 Using Gaussian 03: IA32L-G03RevC.02 12-Jun-2004  
 =====

# opt nosymm freq ub3lyp/6-31g(d)  
 #N Geom=AllCheck Guess=Read SCRF=Check GenChk UB3LYP/6-31G(d) Freq  
 -----

Pointgroup= C1 Stoichiometry= C3HCINS(2) C1[X(C3HCINS)] #Atoms= 7  
 Charge = 0 Multiplicity = 2  
 -----

SCF Energy= -1027.94041834 Predicted Change= -4.366330D-07  
 =====

Optimization completed. {Found 2 times}  
 Item Max Val. Criteria Pass? RMS Val. Criteria Pass?  
 Force 0.00016 || 0.00045 [ YES ] 0.00006 || 0.00030 [ YES ]  
 Displ 0.00091 || 0.00180 [ YES ] 0.00091 || 0.00180 [ YES ]  
 -----

Atomic Coordinates (Angstroms)  
 Type X Y Z  
 -----

|    |           |           |           |
|----|-----------|-----------|-----------|
| C  | 1.196285  | -0.033396 | -0.000310 |
| C  | 0.090322  | -0.943631 | -0.000052 |
| C  | -1.033065 | -0.178356 | 0.000692  |
| S  | -0.716011 | 1.496164  | -0.000353 |
| H  | 0.159114  | -2.022587 | 0.000139  |
| N  | 0.964749  | 1.257285  | 0.000440  |
| Cl | 2.849605  | -0.582080 | -0.000100 |

-----

## Statistical Thermodynamic Analysis

Temperature= 298.150 Kelvin Pressure= 1.00000 Atm  
 =====

SCF Energy= -1027.94041834 Predicted Change= -4.366330D-07  
 Zero-point correction (ZPE)= -1027.9072 0.03320  
 Internal Energy (U)= -1027.9022 0.03816  
 Enthalpy (H)= -1027.9013 0.03911  
 Gibbs Free Energy (G)= -1027.9372 0.00313  
 -----

Frequencies -- 224.4529 300.9737 427.9788

Supporting Information: **3chloroisothiazole.out**

-----  
 Using Gaussian 03: IA32L-G03RevC.02 12-Jun-2004  
 =====

# opt=(modredundant) freq b3lyp/6-31g(d) geom=connectivity  
 #N Geom=AllCheck Guess=Read SCRF=Check GenChk RB3LYP/6-31G(d) Freq  
 -----

Pointgroup= C1 Stoichiometry= C3H2CINS C1[X(C3H2CINS)] #Atoms= 8  
 Charge = 0 Multiplicity = 1  
 -----

SCF Energy= -1028.63528034 Predicted Change= -9.207081D-08  
 =====

Optimization completed. {Found 2 times}  
 Item Max Val. Criteria Pass? RMS Val. Criteria Pass?  
 Force 0.00009 || 0.00045 [ YES ] 0.00003 || 0.00030 [ YES ]  
 Displ 0.00070 || 0.00180 [ YES ] 0.00070 || 0.00180 [ YES ]  
 -----

Atomic Coordinates (Angstroms)  
 Type X Y Z  
 -----

|    |           |           |           |
|----|-----------|-----------|-----------|
| C  | -0.533395 | 0.028120  | -0.000137 |
| C  | 0.120646  | 1.298513  | 0.000044  |
| C  | 1.473385  | 1.107517  | 0.000033  |
| S  | 1.813375  | -0.584866 | -0.000053 |
| H  | -0.390058 | 2.252377  | 0.000076  |
| H  | 2.255982  | 1.855667  | 0.000057  |
| N  | 0.200011  | -1.053874 | 0.000179  |
| Cl | -2.273166 | -0.116351 | -0.000011 |

## Statistical Thermodynamic Analysis

Temperature= 298.150 Kelvin Pressure= 1.00000 Atm  
 =====

SCF Energy= -1028.63528034 Predicted Change= -9.207081D-08  
 Zero-point correction (ZPE)= -1028.5895 0.04574  
 Internal Energy (U)= -1028.5845 0.05072  
 Enthalpy (H)= -1028.5836 0.05167  
 Gibbs Free Energy (G)= -1028.6189 0.01629  
 -----

Frequencies -- 220.9578 302.8590 433.4305

Supporting Information: **3chloroisothiazoleradical.out**

-----  
 Using Gaussian 03: IA32L-G03RevC.02 12-Jun-2004  
 =====

# opt nosymm freq ub3lyp/6-31g(d) geom=connectivity  
 #N Geom=AllCheck Guess=Read SCRF=Check GenChk UB3LYP/6-31G(d) Freq  
 -----

Pointgroup= C1 Stoichiometry= C3H2NS(2) C1[X(C3H2NS)] #Atoms= 7  
 Charge = 0 Multiplicity = 2  
 -----

SCF Energy= -568.356792051 Predicted Change= -2.354405D-07  
 =====

Optimization completed. {Found 2 times}  
 Item Max Val. Criteria Pass? RMS Val. Criteria Pass?  
 Force 0.00022 || 0.00045 [ YES ] 0.00005 || 0.00030 [ YES ]  
 Displ 0.00086 || 0.00180 [ YES ] 0.00086 || 0.00180 [ YES ]  
 -----

| Atomic<br>Type | Coordinates (Angstroms) |   |   |
|----------------|-------------------------|---|---|
|                | X                       | Y | Z |

|   |           |           |           |
|---|-----------|-----------|-----------|
| C | -0.508503 | 0.020698  | 0.000031  |
| C | 0.114042  | 1.303447  | 0.000053  |
| C | 1.469937  | 1.105764  | -0.000006 |
| S | 1.840287  | -0.586274 | 0.000112  |
| H | -0.392799 | 2.258736  | 0.000079  |
| H | 2.252334  | 1.855559  | -0.000016 |
| N | 0.164649  | -1.054477 | -0.000053 |

## Statistical Thermodynamic Analysis

Temperature= 298.150 Kelvin Pressure= 1.00000 Atm  
 =====

SCF Energy= -568.356792051 Predicted Change= -2.354405D-07  
 Zero-point correction (ZPE)= -568.3145 0.04226  
 Internal Energy (U)= -568.3105 0.04624  
 Enthalpy (H)= -568.3096 0.04719  
 Gibbs Free Energy (G)= -568.3422 0.01449  
 -----

Frequencies -- 453.8326 534.5989 576.8851

Supporting Information: **4chloroisoithiazole.out**

-----  
 Using Gaussian 03: IA32L-G03RevC.02 12-Jun-2004  
 =====

# opt=(modredundant) freq b3lyp/6-31g(d) geom=connectivity  
 #N Geom=AllCheck Guess=Read SCRF=Check GenChk RB3LYP/6-31G(d) Freq  
 -----

Pointgroup= C1 Stoichiometry= C3H2CINS C1[X(C3H2CINS)] #Atoms= 8  
 Charge = 0 Multiplicity = 1  
 -----

SCF Energy= -1028.63202444 Predicted Change= -5.500706D-07  
 =====

Optimization completed. {Found 1 times}  
 Item Max Val. Criteria Pass? RMS Val. Criteria Pass?  
 Force 0.00017 || 0.00045 [ YES ] 0.00007 || 0.00030 [ YES ]  
 Displ 0.00263 || 0.00180 [ NO ] 0.00263 || 0.00180 [ YES ]  
 -----

Atomic Coordinates (Angstroms)  
 Type X Y Z  
 -----

|    |           |           |           |
|----|-----------|-----------|-----------|
| C  | -0.140985 | 1.239043  | 0.000034  |
| C  | 0.573781  | 0.002562  | 0.000018  |
| C  | -0.280757 | -1.066442 | 0.000179  |
| S  | -1.894945 | -0.468474 | -0.000094 |
| H  | 0.328369  | 2.218447  | -0.000014 |
| H  | -0.033565 | -2.119374 | 0.000259  |
| N  | -1.452436 | 1.154942  | 0.000086  |
| Cl | 2.310537  | -0.102297 | -0.000043 |

-----

## Statistical Thermodynamic Analysis

Temperature= 298.150 Kelvin Pressure= 1.00000 Atm  
 =====

SCF Energy= -1028.63202444 Predicted Change= -5.500706D-07

Zero-point correction (ZPE)= -1028.5861 0.04584

Internal Energy (U)= -1028.5811 0.05085

Enthalpy (H)= -1028.5802 0.05180

Gibbs Free Energy (G)= -1028.6156 0.01632  
 -----

Frequencies -- 216.0862 280.0528 429.0315

Supporting Information: **4chloroisothiazoleradical.out**

-----  
 Using Gaussian 03: IA32L-G03RevC.02 12-Jun-2004  
 =====

# opt nosymm freq ub3lyp/6-31g(d) geom=connectivity  
 #N Geom=AllCheck Guess=Read SCRF=Check GenChk UB3LYP/6-31G(d) Freq  
 -----

Pointgroup= C1 Stoichiometry= C3H2NS(2) C1[X(C3H2NS)] #Atoms= 7  
 Charge = 0 Multiplicity = 2  
 -----

SCF Energy= -568.346962859 Predicted Change= -5.860697D-07  
 =====

Optimization completed. {Found 2 times}  
 Item Max Val. Criteria Pass? RMS Val. Criteria Pass?  
 Force 0.00025 || 0.00045 [ YES ] 0.00010 || 0.00030 [ YES ]  
 Displ 0.00139 || 0.00180 [ YES ] 0.00139 || 0.00180 [ YES ]  
 -----

Atomic Coordinates (Angstroms)  
 Type X Y Z  
 -----

|   |           |           |           |
|---|-----------|-----------|-----------|
| C | -0.130999 | 1.249300  | -0.000039 |
| C | 0.543769  | 0.003585  | 0.000091  |
| C | -0.267503 | -1.079850 | 0.000148  |
| S | -1.895812 | -0.469485 | -0.000046 |
| H | 0.329912  | 2.231265  | 0.000007  |
| H | -0.030986 | -2.135251 | 0.000236  |
| N | -1.448918 | 1.161140  | 0.000071  |

-----

## Statistical Thermodynamic Analysis

Temperature= 298.150 Kelvin Pressure= 1.00000 Atm  
 =====

SCF Energy= -568.346962859 Predicted Change= -5.860697D-07  
 Zero-point correction (ZPE)= -568.3043 0.04261  
 Internal Energy (U)= -568.3004 0.04649  
 Enthalpy (H)= -568.2995 0.04743  
 Gibbs Free Energy (G)= -568.3320 0.01490  
 -----

Frequencies -- 460.1571 571.7713 619.7942

Supporting Information: **5chloro3radicalisothiazole.out**

-----  
 Using Gaussian 03: IA32L-G03RevC.02 12-Jun-2004  
 =====

# opt nosymm freq ub3lyp/6-31g(d)  
 #N Geom=AllCheck Guess=Read SCRF=Check GenChk UB3LYP/6-31G(d) Freq  
 -----

Pointgroup= C1 Stoichiometry= C3HCINS(2) C1[X(C3HCINS)] #Atoms= 7  
 Charge = 0 Multiplicity = 2  
 -----

SCF Energy= -1027.94653298 Predicted Change= -8.208625D-07  
 =====

Optimization completed. {Found 2 times}  
 Item Max Val. Criteria Pass? RMS Val. Criteria Pass?  
 Force 0.00022 || 0.00045 [ YES ] 0.00009 || 0.00030 [ YES ]  
 Displ 0.00152 || 0.00180 [ YES ] 0.00152 || 0.00180 [ YES ]  
 -----

Atomic Coordinates (Angstroms)  
 Type X Y Z  
 -----

|    |           |           |           |
|----|-----------|-----------|-----------|
| C  | 1.177020  | -0.009901 | 0.000422  |
| C  | 0.099902  | -0.938735 | -0.000146 |
| C  | -1.057056 | -0.202737 | 0.000364  |
| S  | -0.723263 | 1.510209  | -0.000796 |
| H  | 0.167939  | -2.017283 | -0.000271 |
| N  | 0.995091  | 1.245049  | 0.000532  |
| Cl | -2.673720 | -0.806355 | 0.000334  |

-----

## Statistical Thermodynamic Analysis

Temperature= 298.150 Kelvin Pressure= 1.00000 Atm  
 =====

SCF Energy= -1027.94653298 Predicted Change= -8.208625D-07  
 Zero-point correction (ZPE)= -1027.9135 0.03294  
 Internal Energy (U)= -1027.9084 0.03804  
 Enthalpy (H)= -1027.9075 0.03898  
 Gibbs Free Energy (G)= -1027.9437 0.00276  
 -----

Frequencies -- 222.5159 256.1646 428.3774

Supporting Information: **5chloroisothiazole.out**

-----  
 Using Gaussian 03: IA32L-G03RevC.02 12-Jun-2004  
 =====

# opt=(modredundant) freq b3lyp/6-31g(d) geom=connectivity  
 #N Geom=AllCheck Guess=Read SCRF=Check GenChk RB3LYP/6-31G(d) Freq  
 -----

Pointgroup= C1 Stoichiometry= C3H2CINS C1[X(C3H2CINS)] #Atoms= 8  
 Charge = 0 Multiplicity = 1  
 -----

SCF Energy= -1028.62978717 Predicted Change= -5.334834D-07  
 =====

Optimization completed. {Found 1 times}  
 Item Max Val. Criteria Pass? RMS Val. Criteria Pass?  
 Force 0.00027 || 0.00045 [ YES ] 0.00007 || 0.00030 [ YES ]  
 Displ 0.00274 || 0.00180 [ NO ] 0.00274 || 0.00180 [ YES ]  
 -----

Atomic Coordinates (Angstroms)  
 Type X Y Z  
 -----

|    |           |           |           |
|----|-----------|-----------|-----------|
| C  | 1.693700  | 1.042986  | 0.000123  |
| C  | 0.304470  | 1.355584  | 0.000012  |
| C  | -0.423397 | 0.194953  | -0.000027 |
| S  | 0.646544  | -1.170050 | 0.000082  |
| H  | 2.488537  | 1.784510  | 0.000122  |
| H  | -0.119150 | 2.351902  | 0.000048  |
| N  | 2.038200  | -0.229946 | -0.000241 |
| Cl | -2.142949 | 0.037228  | -0.000026 |

-----

## Statistical Thermodynamic Analysis

Temperature= 298.150 Kelvin Pressure= 1.00000 Atm  
 =====

SCF Energy= -1028.62978717 Predicted Change= -5.334834D-07  
 Zero-point correction (ZPE)= -1028.5838 0.04595  
 Internal Energy (U)= -1028.5788 0.05096  
 Enthalpy (H)= -1028.5778 0.05191  
 Gibbs Free Energy (G)= -1028.6133 0.01643  
 -----

Frequencies -- 221.8902 254.9597 439.0507

Supporting Information: **5chloroisthiazoleradical.out**

-----  
 Using Gaussian 03: IA32L-G03RevC.02 12-Jun-2004  
 =====

# opt nosymm freq ub3lyp/6-31g(d) geom=connectivity  
 #N Geom=AllCheck Guess=Read SCRF=Check GenChk UB3LYP/6-31G(d) Freq  
 -----

Pointgroup= C1 Stoichiometry= C3H2NS(2) C1[X(C3H2NS)] #Atoms= 7  
 Charge = 0 Multiplicity = 2  
 -----

SCF Energy= -568.345614008 Predicted Change= -8.216407D-07  
 =====

Optimization completed. {Found 2 times}  
 Item Max Val. Criteria Pass? RMS Val. Criteria Pass?  
 Force 0.00020 || 0.00045 [ YES ] 0.00008 || 0.00030 [ YES ]  
 Displ 0.00161 || 0.00180 [ YES ] 0.00161 || 0.00180 [ YES ]  
 -----

Atomic Coordinates (Angstroms)  
 Type X Y Z  
 -----

|   |           |           |           |
|---|-----------|-----------|-----------|
| C | 1.690505  | 1.046126  | -0.000297 |
| C | 0.297326  | 1.364330  | -0.000066 |
| C | -0.387868 | 0.186450  | 0.000479  |
| S | 0.628331  | -1.179412 | -0.000789 |
| H | 2.490996  | 1.782000  | -0.000155 |
| H | -0.127879 | 2.359842  | 0.000118  |
| N | 2.037493  | -0.229396 | 0.000828  |

-----

## Statistical Thermodynamic Analysis

Temperature= 298.150 Kelvin Pressure= 1.00000 Atm  
 =====

SCF Energy= -568.345614008 Predicted Change= -8.216407D-07  
 Zero-point correction (ZPE)= -568.3029 0.04268  
 Internal Energy (U)= -568.2990 0.04656  
 Enthalpy (H)= -568.2981 0.04751  
 Gibbs Free Energy (G)= -568.3306 0.01496  
 -----

Frequencies -- 434.6065 586.3343 610.7474



**Chloroisoxazole**Supporting Information: **3chloroisoxazole.out**-----  
Using Gaussian 03: IA32L-G03RevC.02 12-Jun-2004  
=====# opt=(modredundant) freq b3lyp/6-31g(d) geom=connectivity  
#N Geom=AllCheck Guess=Read SCRF=Check GenChk RB3LYP/6-31G(d) Freq  
-----Pointgroup= C1 Stoichiometry= C3H2ClNO C1[X(C3H2ClNO)] #Atoms= 8  
Charge = 0 Multiplicity = 1  
-----SCF Energy= -705.625326811 Predicted Change= -1.885277D-07  
=====Optimization completed. {Found 2 times}  
Item Max Val. Criteria Pass? RMS Val. Criteria Pass?  
Force 0.00016 || 0.00045 [ YES ] 0.00005 || 0.00030 [ YES ]  
Displ 0.00099 || 0.00180 [ YES ] 0.00099 || 0.00180 [ YES ]  
-----Atomic Coordinates (Angstroms)  
Type X Y Z  
-----

|    |           |           |           |
|----|-----------|-----------|-----------|
| C  | -1.846532 | 0.591647  | 0.000019  |
| C  | -0.609007 | 1.150837  | 0.000027  |
| C  | 0.240395  | 0.008186  | -0.000033 |
| H  | -2.848566 | 0.996867  | -0.000022 |
| H  | -0.326345 | 2.191586  | 0.000003  |
| N  | -0.413497 | -1.129232 | 0.000234  |
| O  | -1.758685 | -0.752195 | -0.000059 |
| Cl | 1.966455  | 0.013512  | -0.000073 |

-----  
Statistical Thermodynamic AnalysisTemperature= 298.150 Kelvin Pressure= 1.00000 Atm  
=====SCF Energy= -705.625326811 Predicted Change= -1.885277D-07  
Zero-point correction (ZPE)= -705.5766 0.04869  
Internal Energy (U)= -705.5720 0.05328  
Enthalpy (H)= -705.5710 0.05423  
Gibbs Free Energy (G)= -705.6052 0.02008  
-----

Frequencies -- 258.8084 313.7286 488.2311

Supporting Information: **3radicalisoxazole.out**

-----  
 Using Gaussian 03: IA32L-G03RevC.02 12-Jun-2004  
 =====

# opt nosymm freq ub3lyp/6-31g(d) geom=connectivity  
 #N Geom=AllCheck Guess=Read SCRF=Check GenChk UB3LYP/6-31G(d) Freq  
 -----

Pointgroup= C1 Stoichiometry= C3H2NO(2) C1[X(C3H2NO)] #Atoms= 7  
 Charge = 0 Multiplicity = 2  
 -----

SCF Energy= -245.339629501 Predicted Change= -2.062271D-07  
 =====

Optimization completed. {Found 2 times}  
 Item Max Val. Criteria Pass? RMS Val. Criteria Pass?  
 Force 0.00011 || 0.00045 [ YES ] 0.00006 || 0.00030 [ YES ]  
 Displ 0.00083 || 0.00180 [ YES ] 0.00083 || 0.00180 [ YES ]  
 -----

Atomic Coordinates (Angstroms)  
 Type X Y Z  
 -----

|   |           |           |           |
|---|-----------|-----------|-----------|
| C | -1.844037 | 0.589714  | 0.000172  |
| C | -0.605889 | 1.157686  | -0.000070 |
| C | 0.216127  | -0.001653 | 0.000214  |
| H | -2.843506 | 1.003756  | 0.000146  |
| H | -0.326981 | 2.198850  | -0.000164 |
| N | -0.381331 | -1.133321 | 0.000268  |
| O | -1.776621 | -0.757336 | -0.000398 |

-----

## Statistical Thermodynamic Analysis

Temperature= 298.150 Kelvin Pressure= 1.00000 Atm  
 =====

SCF Energy= -245.339629501 Predicted Change= -2.062271D-07  
 Zero-point correction (ZPE)= -245.2948 0.04479  
 Internal Energy (U)= -245.2911 0.04843  
 Enthalpy (H)= -245.2902 0.04937  
 Gibbs Free Energy (G)= -245.3216 0.01799  
 -----

Frequencies -- 574.8769 596.4850 695.8728

Supporting Information: **4chloroisoxazole.out**

-----  
 Using Gaussian 03: IA32L-G03RevC.02 12-Jun-2004  
 =====

# opt=(modredundant) freq b3lyp/6-31g(d) geom=connectivity  
 #N Geom=AllCheck Guess=Read SCRF=Check GenChk RB3LYP/6-31G(d) Freq  
 -----

Pointgroup= C1 Stoichiometry= C3H2ClNO C1[X(C3H2ClNO)] #Atoms= 8  
 Charge = 0 Multiplicity = 1  
 -----

SCF Energy= -705.622973921 Predicted Change= -1.166850D-08  
 =====

Optimization completed. {Found 2 times}  
 Item Max Val. Criteria Pass? RMS Val. Criteria Pass?  
 Force 0.00004 || 0.00045 [ YES ] 0.00001 || 0.00030 [ YES ]  
 Displ 0.00021 || 0.00180 [ YES ] 0.00021 || 0.00180 [ YES ]  
 -----

Atomic Coordinates (Angstroms)  
 Type X Y Z  
 -----

|    |           |           |           |
|----|-----------|-----------|-----------|
| C  | 0.564573  | -1.086214 | 0.000008  |
| C  | -0.270205 | -0.010992 | -0.000012 |
| C  | 0.608347  | 1.108612  | 0.000054  |
| H  | 0.402400  | -2.153820 | 0.000003  |
| N  | 1.865276  | 0.736508  | -0.000003 |
| H  | 0.356299  | 2.161037  | 0.000069  |
| O  | 1.839790  | -0.663035 | 0.000080  |
| Cl | -1.997074 | 0.004298  | -0.000058 |

-----

## Statistical Thermodynamic Analysis

Temperature= 298.150 Kelvin Pressure= 1.00000 Atm  
 =====

SCF Energy= -705.622973921 Predicted Change= -1.166850D-08  
 Zero-point correction (ZPE)= -705.5741 0.04879  
 Internal Energy (U)= -705.5695 0.05341  
 Enthalpy (H)= -705.5686 0.05435  
 Gibbs Free Energy (G)= -705.6028 0.02009  
 -----

Frequencies -- 255.9066 290.1389 482.7155

Supporting Information: **4radicalisoxazole.out**

-----  
 Using Gaussian 03: IA32L-G03RevC.02 12-Jun-2004  
 =====

# opt nosymm freq ub3lyp/6-31g(d) geom=connectivity  
 #N Geom=AllCheck Guess=Read SCRF=Check GenChk UB3LYP/6-31G(d) Freq  
 -----

Pointgroup= C1 Stoichiometry= C3H2NO(2) C1[X(C3H2NO)] #Atoms= 7  
 Charge = 0 Multiplicity = 2  
 -----

SCF Energy= -245.333060937 Predicted Change= -7.934613D-07  
 =====

Optimization completed. {Found 2 times}  
 Item Max Val. Criteria Pass? RMS Val. Criteria Pass?  
 Force 0.00029 || 0.00045 [ YES ] 0.00012 || 0.00030 [ YES ]  
 Displ 0.00121 || 0.00180 [ YES ] 0.00121 || 0.00180 [ YES ]  
 -----

Atomic Coordinates (Angstroms)  
 Type X Y Z  
 -----

|   |           |           |           |
|---|-----------|-----------|-----------|
| C | 0.557931  | -1.094039 | 0.000097  |
| C | -0.253055 | -0.010551 | 0.000070  |
| C | 0.598447  | 1.117372  | -0.000132 |
| H | 0.403576  | -2.162304 | 0.000029  |
| N | 1.859522  | 0.738078  | 0.000365  |
| H | 0.358980  | 2.171995  | 0.000012  |
| O | 1.841079  | -0.668456 | -0.000242 |

-----

## Statistical Thermodynamic Analysis

Temperature= 298.150 Kelvin Pressure= 1.00000 Atm  
 =====

SCF Energy= -245.333060937 Predicted Change= -7.934613D-07  
 Zero-point correction (ZPE)= -245.2875 0.04550  
 Internal Energy (U)= -245.2840 0.04905  
 Enthalpy (H)= -245.2830 0.04999  
 Gibbs Free Energy (G)= -245.3143 0.01873  
 -----

Frequencies -- 545.8189 630.2258 818.7626

Supporting Information: **5chloroisoxazole.out**

-----  
 Using Gaussian 03: IA32L-G03RevC.02 12-Jun-2004  
 =====

# opt=(modredundant) freq b3lyp/6-31g(d) geom=connectivity  
 #N Geom=AllCheck Guess=Read SCRF=Check GenChk RB3LYP/6-31G(d) Freq  
 -----

Pointgroup= C1 Stoichiometry= C3H2ClNO C1[X(C3H2ClNO)] #Atoms= 8  
 Charge = 0 Multiplicity = 1  
 -----

SCF Energy= -705.624900368 Predicted Change= -6.566954D-08  
 =====

Optimization completed. {Found 2 times}  
 Item Max Val. Criteria Pass? RMS Val. Criteria Pass?  
 Force 0.00008 || 0.00045 [ YES ] 0.00003 || 0.00030 [ YES ]  
 Displ 0.00042 || 0.00180 [ YES ] 0.00042 || 0.00180 [ YES ]  
 -----

Atomic Coordinates (Angstroms)  
 Type X Y Z  
 -----

|    |           |           |           |
|----|-----------|-----------|-----------|
| C  | -0.233558 | 0.097069  | -0.000012 |
| C  | 0.617847  | 1.159969  | -0.000078 |
| C  | 1.890486  | 0.528082  | 0.000113  |
| H  | 0.374835  | 2.210633  | -0.000133 |
| N  | 1.811727  | -0.783135 | -0.000136 |
| H  | 2.870458  | 0.989373  | 0.000173  |
| O  | 0.434178  | -1.065753 | 0.000096  |
| Cl | -1.944086 | 0.005720  | 0.000001  |

-----

## Statistical Thermodynamic Analysis

Temperature= 298.150 Kelvin Pressure= 1.00000 Atm  
 =====

SCF Energy= -705.624900368 Predicted Change= -6.566954D-08  
 Zero-point correction (ZPE)= -705.5762 0.04867  
 Internal Energy (U)= -705.5716 0.05327  
 Enthalpy (H)= -705.5706 0.05422  
 Gibbs Free Energy (G)= -705.6048 0.02003  
 -----

Frequencies -- 235.4618 309.7176 493.1690

Supporting Information: **5radicalisoxazole.out**

-----  
 Using Gaussian 03: IA32L-G03RevC.02 12-Jun-2004  
 =====

# opt nosymm freq ub3lyp/6-31g(d) geom=connectivity  
 #N Geom=AllCheck Guess=Read SCRF=Check GenChk UB3LYP/6-31G(d) Freq  
 -----

Pointgroup= C1 Stoichiometry= C3H2NO(2) C1[X(C3H2NO)] #Atoms= 7  
 Charge = 0 Multiplicity = 2  
 -----

SCF Energy= -245.337436183 Predicted Change= -9.484674D-08  
 =====

Optimization completed. {Found 2 times}  
 Item Max Val. Criteria Pass? RMS Val. Criteria Pass?  
 Force 0.00010 || 0.00045 [ YES ] 0.00003 || 0.00030 [ YES ]  
 Displ 0.00050 || 0.00180 [ YES ] 0.00050 || 0.00180 [ YES ]  
 -----

Atomic Coordinates (Angstroms)  
 Type X Y Z  
 -----

|   |           |           |           |
|---|-----------|-----------|-----------|
| C | -0.208608 | 0.085049  | -0.000074 |
| C | 0.615779  | 1.168726  | -0.000023 |
| C | 1.888899  | 0.529018  | 0.000012  |
| H | 0.369382  | 2.217551  | -0.000047 |
| N | 1.826282  | -0.785455 | 0.000138  |
| H | 2.870093  | 0.989432  | 0.000053  |
| O | 0.404146  | -1.068083 | -0.000035 |

-----

## Statistical Thermodynamic Analysis

Temperature= 298.150 Kelvin Pressure= 1.00000 Atm  
 =====

SCF Energy= -245.337436183 Predicted Change= -9.484674D-08  
 Zero-point correction (ZPE)= -245.2925 0.04492  
 Internal Energy (U)= -245.2889 0.04853  
 Enthalpy (H)= -245.2879 0.04947  
 Gibbs Free Energy (G)= -245.3193 0.01811  
 -----

Frequencies -- 560.8806 626.3257 694.6866

**Chloropyrazoles**

Supporting Information: 3chloropyrazole.out

-----  
Using Gaussian 03: IA32L-G03RevC.02 12-Jun-2004

=====

# opt=(modredundant) freq b3lyp/6-31g(d) geom=connectivity

#N Geom=AllCheck Guess=Read SCRF=Check GenChk RB3LYP/6-31G(d) Freq

-----  
Pointgroup= C1 Stoichiometry= C3H3ClN2 C1[X(C3H3ClN2)] #Atoms= 9

Charge = 0 Multiplicity = 1

-----  
SCF Energy= -685.791977857 Predicted Change= -1.235737D-06

=====

Optimization completed. {Found 2 times}

Item Max Val. Criteria Pass? RMS Val. Criteria Pass?

Force 0.00030 || 0.00045 [ YES ] 0.00012 || 0.00030 [ YES ]

Displ 0.00169 || 0.00180 [ YES ] 0.00169 || 0.00180 [ YES ]

-----  
Atomic Coordinates (Angstroms)  
Type X Y Z-----  
C 1.853146 0.650341 0.000047  
C 0.571595 1.164890 0.000041  
C -0.249719 0.014971 0.000013  
N 1.722541 -0.701450 -0.000012  
H 2.453971 -1.396672 -0.000133  
H 2.820903 1.131435 0.000107  
H 0.265720 2.199483 0.000085  
Cl -1.983184 -0.009995 0.000003  
N 0.437945 -1.119341 -0.000090-----  
Statistical Thermodynamic Analysis

Temperature= 298.150 Kelvin Pressure= 1.00000 Atm

=====

SCF Energy= -685.791977857 Predicted Change= -1.235737D-06

Zero-point correction (ZPE)= -685.7300 0.06193

Internal Energy (U)= -685.7252 0.06672

Enthalpy (H)= -685.7243 0.06766

Gibbs Free Energy (G)= -685.7587 0.03324

-----  
Frequencies -- 254.6740 317.2280 481.5258

Supporting Information: **4chloropyrazole.out**

-----  
 Using Gaussian 03: IA32L-G03RevC.02 12-Jun-2004  
 =====

# opt=(modredundant) freq b3lyp/6-31g(d) geom=connectivity  
 #N Geom=AllCheck Guess=Read SCRF=Check GenChk RB3LYP/6-31G(d) Freq  
 -----

Pointgroup= C1 Stoichiometry= C3H3ClN2 C1[X(C3H3ClN2)] #Atoms= 9  
 Charge = 0 Multiplicity = 1  
 -----

SCF Energy= -685.789776856 Predicted Change= -9.130056D-08  
 =====

Optimization completed. {Found 2 times}  
 Item Max Val. Criteria Pass? RMS Val. Criteria Pass?  
 Force 0.00008 || 0.00045 [ YES ] 0.00003 || 0.00030 [ YES ]  
 Displ 0.00102 || 0.00180 [ YES ] 0.00102 || 0.00180 [ YES ]  
 -----

Atomic Coordinates (Angstroms)  
 Type X Y Z  
 -----

|    |           |           |           |
|----|-----------|-----------|-----------|
| C  | 0.559978  | -1.100793 | 0.000066  |
| C  | -0.276469 | -0.001289 | -0.000017 |
| C  | 0.573503  | 1.126459  | 0.000094  |
| N  | 1.817484  | -0.588829 | 0.000092  |
| H  | 2.688945  | -1.097518 | 0.000191  |
| H  | 0.354266  | -2.160625 | 0.000063  |
| N  | 1.853602  | 0.759873  | 0.000007  |
| H  | 0.299430  | 2.172273  | 0.000110  |
| Cl | -2.010724 | -0.015159 | -0.000113 |

-----

## Statistical Thermodynamic Analysis

Temperature= 298.150 Kelvin Pressure= 1.00000 Atm  
 =====

SCF Energy= -685.789776856 Predicted Change= -9.130056D-08  
 Zero-point correction (ZPE)= -685.7276 0.06209  
 Internal Energy (U)= -685.7228 0.06690  
 Enthalpy (H)= -685.7219 0.06784  
 Gibbs Free Energy (G)= -685.7564 0.03332  
 -----

Frequencies -- 249.3791 292.2446 480.3857



Supporting Information: **4chloropyrazole.out**

-----  
 Using Gaussian 03: IA32L-G03RevC.02 12-Jun-2004  
 =====

# opt=(modredundant) freq b3lyp/6-31g(d) geom=connectivity  
 #N Geom=AllCheck Guess=Read SCRF=Check GenChk RB3LYP/6-31G(d) Freq  
 -----

Pointgroup= C1 Stoichiometry= C3H3ClN2 C1[X(C3H3ClN2)] #Atoms= 9  
 Charge = 0 Multiplicity = 1  
 -----

SCF Energy= -685.789776856 Predicted Change= -9.130056D-08  
 =====

Optimization completed. {Found 2 times}  
 Item Max Val. Criteria Pass? RMS Val. Criteria Pass?  
 Force 0.00008 || 0.00045 [ YES ] 0.00003 || 0.00030 [ YES ]  
 Displ 0.00102 || 0.00180 [ YES ] 0.00102 || 0.00180 [ YES ]  
 -----

Atomic Coordinates (Angstroms)  
 Type X Y Z  
 -----

|    |           |           |           |
|----|-----------|-----------|-----------|
| C  | 0.559978  | -1.100793 | 0.000066  |
| C  | -0.276469 | -0.001289 | -0.000017 |
| C  | 0.573503  | 1.126459  | 0.000094  |
| N  | 1.817484  | -0.588829 | 0.000092  |
| H  | 2.688945  | -1.097518 | 0.000191  |
| H  | 0.354266  | -2.160625 | 0.000063  |
| N  | 1.853602  | 0.759873  | 0.000007  |
| H  | 0.299430  | 2.172273  | 0.000110  |
| Cl | -2.010724 | -0.015159 | -0.000113 |

-----

## Statistical Thermodynamic Analysis

Temperature= 298.150 Kelvin Pressure= 1.00000 Atm  
 =====

SCF Energy= -685.789776856 Predicted Change= -9.130056D-08  
 Zero-point correction (ZPE)= -685.7276 0.06209  
 Internal Energy (U)= -685.7228 0.06690  
 Enthalpy (H)= -685.7219 0.06784  
 Gibbs Free Energy (G)= -685.7564 0.03332  
 -----

Frequencies -- 249.3791 292.2446 480.3857

Supporting Information: **3radicalpyrazole.out**

Using Gaussian 03: AM64L-G03RevC.02 12-Jun-2004

# opt nosymm freq ub3lyp/6-31g(d) geom=connectivity  
#N Geom=AllCheck Guess=Read SCRF=Check GenChk UB3LYP/6-31G(d) Freq

Pointgroup= C1 Stoichiometry= C3H3N2(2) C1[X(C3H3N2)] #Atoms= 8  
Charge = 0 Multiplicity = 2

SCF Energy= -225.503214015 Predicted Change= -7.656590D-08

Optimization completed. {Found 2 times}  
Item Max Val. Criteria Pass? RMS Val. Criteria Pass?  
Force 0.00010 || 0.00045 [ YES ] 0.00004 || 0.00030 [ YES ]  
Displ 0.00037 || 0.00180 [ YES ] 0.00037 || 0.00180 [ YES ]

Atomic Coordinates (Angstroms)  
Type X Y Z

|   |           |           |           |
|---|-----------|-----------|-----------|
| C | 1.848625  | 0.648550  | 0.000067  |
| C | 0.564360  | 1.170490  | 0.000031  |
| C | -0.234436 | 0.007306  | 0.000032  |
| N | 1.727936  | -0.706772 | -0.000052 |
| H | 2.460980  | -1.400573 | -0.000132 |
| H | 2.816390  | 1.131832  | 0.000120  |
| H | 0.267335  | 2.207438  | 0.000072  |
| N | 0.424912  | -1.114613 | -0.000080 |

## Statistical Thermodynamic Analysis

Temperature= 298.150 Kelvin Pressure= 1.00000 Atm

SCF Energy= -225.503214015 Predicted Change= -7.656590D-08

Zero-point correction (ZPE)= -225.4449 0.05828

Internal Energy (U)= -225.4411 0.06208

Enthalpy (H)= -225.4401 0.06303

Gibbs Free Energy (G)= -225.4718 0.03139

Frequencies -- 425.2000 599.9808 651.7509

Supporting Information: **4radicalpyrazole.out**

-----  
 Using Gaussian 03: AM64L-G03RevC.02 12-Jun-2004  
 =====

# opt nosymm freq ub3lyp/6-31g(d) geom=connectivity  
 #N Geom=AllCheck Guess=Read SCRF=Check GenChk UB3LYP/6-31G(d) Freq  
 -----

Pointgroup= C1 Stoichiometry= C3H3N2(2) C1[X(C3H3N2)] #Atoms= 8  
 Charge = 0 Multiplicity = 2  
 -----

SCF Energy= -225.498682271 Predicted Change= -4.324446D-07  
 =====

Optimization completed. {Found 2 times}  
 Item Max Val. Criteria Pass? RMS Val. Criteria Pass?  
 Force 0.00023 || 0.00045 [ YES ] 0.00008 || 0.00030 [ YES ]  
 Displ 0.00113 || 0.00180 [ YES ] 0.00113 || 0.00180 [ YES ]  
 -----

Atomic Coordinates (Angstroms)  
 Type X Y Z  
 -----

|   |           |           |           |
|---|-----------|-----------|-----------|
| C | 0.553898  | -1.107843 | 0.000113  |
| C | -0.261899 | -0.000601 | 0.000062  |
| C | 0.562267  | 1.134155  | -0.000082 |
| N | 1.816191  | -0.594628 | 0.000019  |
| H | 2.693804  | -1.093623 | -0.000030 |
| H | 0.354328  | -2.168834 | 0.000092  |
| N | 1.847415  | 0.757453  | 0.000471  |
| H | 0.304735  | 2.183471  | -0.000039 |

-----

## Statistical Thermodynamic Analysis

Temperature= 298.150 Kelvin Pressure= 1.00000 Atm  
 =====

SCF Energy= -225.498682271 Predicted Change= -4.324446D-07  
 Zero-point correction (ZPE)= -225.4399 0.05875  
 Internal Energy (U)= -225.4361 0.06249  
 Enthalpy (H)= -225.4352 0.06344  
 Gibbs Free Energy (G)= -225.4667 0.03191  
 -----

Frequencies -- 476.6406 564.2682 687.0193

Supporting Information: **5radicalpyrazole.out**

-----  
 Using Gaussian 03: AM64L-G03RevC.02 12-Jun-2004  
 =====

# opt nosymm freq ub3lyp/6-31g(d) geom=connectivity  
 #N Geom=AllCheck Guess=Read SCRF=Check GenChk UB3LYP/6-31G(d) Freq  
 -----

Pointgroup= C1 Stoichiometry= C3H3N2(2) C1[X(C3H3N2)] #Atoms= 8  
 Charge = 0 Multiplicity = 2  
 -----

SCF Energy= -225.500111468 Predicted Change= -1.748053D-07  
 =====

Optimization completed. {Found 2 times}  
 Item Max Val. Criteria Pass? RMS Val. Criteria Pass?  
 Force 0.00011 || 0.00045 [ YES ] 0.00004 || 0.00030 [ YES ]  
 Displ 0.00089 || 0.00180 [ YES ] 0.00089 || 0.00180 [ YES ]  
 -----

Atomic Coordinates (Angstroms)  
 Type X Y Z  
 -----

|   |           |           |           |
|---|-----------|-----------|-----------|
| C | -0.225752 | 0.088922  | -0.000128 |
| C | 0.614375  | 1.179353  | 0.000049  |
| C | 1.894055  | 0.570884  | -0.000129 |
| N | 0.501722  | -1.039726 | -0.000001 |
| H | 0.191762  | -1.998828 | -0.000016 |
| H | 0.356297  | 2.226621  | -0.000011 |
| N | 1.838964  | -0.763655 | 0.000578  |
| H | 2.862313  | 1.055548  | -0.000187 |

-----

## Statistical Thermodynamic Analysis

Temperature= 298.150 Kelvin Pressure= 1.00000 Atm  
 =====

SCF Energy= -225.500111468 Predicted Change= -1.748053D-07  
 Zero-point correction (ZPE)= -225.4416 0.05843  
 Internal Energy (U)= -225.4378 0.06223  
 Enthalpy (H)= -225.4369 0.06317  
 Gibbs Free Energy (G)= -225.4685 0.03153  
 -----

Frequencies -- 408.5610 572.4855 674.8490

**Chloropyridazine**Supporting Information: **3chloropyridazine.out**-----  
Using Gaussian 03: IA32L-G03RevC.02 12-Jun-2004

=====

# opt=(modredundant) freq b3lyp/6-31g(d) geom=connectivity

#N Geom=AllCheck Guess=Read SCRF=Check GenChk RB3LYP/6-31G(d) Freq

-----  
Pointgroup= C1 Stoichiometry= C4H3ClN2 C1[X(C4H3ClN2)] #Atoms= 10

Charge = 0 Multiplicity = 1

-----  
SCF Energy= -723.882682499 Predicted Change= -7.051054D-08

=====

Optimization completed. {Found 2 times}

Item Max Val. Criteria Pass? RMS Val. Criteria Pass?

Force 0.00015 || 0.00045 [ YES ] 0.00003 || 0.00030 [ YES ]

Displ 0.00068 || 0.00180 [ YES ] 0.00068 || 0.00180 [ YES ]

-----  
Atomic Coordinates (Angstroms)  
Type X Y Z-----  
N 1.461187 -1.262737 -0.000004  
C 2.175327 -0.136941 -0.000001  
C 1.604469 1.142286 0.000003  
C 0.224982 1.220754 0.000003  
C -0.456724 -0.003385 0.000000  
N 0.124258 -1.193068 -0.000003  
H 2.225512 2.033016 0.000006  
H 3.252871 -0.277316 0.000000  
H -0.312684 2.162352 0.000006  
Cl -2.208949 -0.003747 0.000001-----  
Statistical Thermodynamic Analysis

Temperature= 298.150 Kelvin Pressure= 1.00000 Atm

=====

SCF Energy= -723.882682499 Predicted Change= -7.051054D-08

Zero-point correction (ZPE)= -723.8160 0.06658

Internal Energy (U)= -723.8107 0.07190

Enthalpy (H)= -723.8098 0.07284

Gibbs Free Energy (G)= -723.8458 0.03687

-----  
Frequencies -- 178.1644 310.5458 383.5197

Supporting Information: **4chloropyridazine.out**

-----  
 Using Gaussian 03: AM64L-G03RevC.02 12-Jun-2004  
 =====

# opt=(modredundant) freq b3lyp/6-31g(d) geom=connectivity  
 #N Geom=AllCheck Guess=Read SCRF=Check GenChk RB3LYP/6-31G(d) Freq  
 -----

Pointgroup= C1 Stoichiometry= C4H3ClN2 C1[X(C4H3ClN2)] #Atoms= 10  
 Charge = 0 Multiplicity = 1  
 -----

SCF Energy= -723.881831939 Predicted Change= -7.726720D-08  
 =====

Optimization completed. {Found 2 times}  
 Item Max Val. Criteria Pass? RMS Val. Criteria Pass?  
 Force 0.00017 || 0.00045 [ YES ] 0.00003 || 0.00030 [ YES ]  
 Displ 0.00052 || 0.00180 [ YES ] 0.00052 || 0.00180 [ YES ]  
 -----

Atomic Coordinates (Angstroms)  
 Type X Y Z  
 -----

|    |           |           |           |
|----|-----------|-----------|-----------|
| N  | -1.563762 | -1.214018 | -0.000002 |
| C  | -0.230386 | -1.173927 | -0.000003 |
| C  | 0.490581  | 0.026011  | 0.000000  |
| C  | -0.223696 | 1.209443  | 0.000003  |
| C  | -1.617624 | 1.086111  | 0.000003  |
| N  | -2.267661 | -0.080005 | 0.000000  |
| H  | 0.276278  | -2.134877 | -0.000005 |
| H  | 0.263449  | 2.178553  | 0.000005  |
| H  | -2.251657 | 1.969263  | 0.000005  |
| Cl | 2.236390  | 0.009376  | 0.000000  |

-----

## Statistical Thermodynamic Analysis

Temperature= 298.150 Kelvin Pressure= 1.00000 Atm  
 =====

SCF Energy= -723.881831939 Predicted Change= -7.726720D-08  
 Zero-point correction (ZPE)= -723.8150 0.06675  
 Internal Energy (U)= -723.8097 0.07207  
 Enthalpy (H)= -723.8088 0.07301  
 Gibbs Free Energy (G)= -723.8448 0.03700  
 -----

Frequencies -- 181.1366 291.2619 388.9732

**Chloropyridines**Supporting Information: **23dichloropyridine.out**-----  
Using Gaussian 03: IA32L-G03RevC.02 12-Jun-2004  
=====

# opt freq b3lyp/6-311+g(d,p) geom=connectivity

#N Geom=AllCheck Guess=Read SCRF=Check GenChk RB3LYP/6-311+G(d,p) Freq  
-----

Pointgroup= C1 Stoichiometry= C5H3Cl2N C1[X(C5H3Cl2N)] #Atoms= 11

Charge = 0 Multiplicity = 1  
-----SCF Energy= -1167.59320279 Predicted Change= -1.483940D-06  
=====

Optimization completed. {Found 2 times}

Item Max Val. Criteria Pass? RMS Val. Criteria Pass?

Force 0.00043 || 0.00045 [ YES ] 0.00012 || 0.00030 [ YES ]

Displ 0.00177 || 0.00180 [ YES ] 0.00177 || 0.00180 [ YES ]  
-----Atomic Coordinates (Angstroms)  
Type X Y Z  
-----

|    |           |           |           |
|----|-----------|-----------|-----------|
| C  | 0.013279  | -0.700281 | -0.000011 |
| C  | -0.022669 | 0.702482  | 0.000048  |
| C  | 1.188606  | 1.384901  | 0.000247  |
| C  | 2.374905  | 0.658581  | 0.000369  |
| C  | 2.297617  | -0.728938 | 0.000268  |
| N  | 1.136070  | -1.389317 | 0.000084  |
| H  | 1.190666  | 2.467576  | 0.000306  |
| H  | 3.334080  | 1.160841  | 0.000531  |
| H  | 3.192402  | -1.342324 | 0.000361  |
| Cl | -1.471226 | -1.628050 | -0.000308 |
| Cl | -1.515837 | 1.600912  | -0.000122 |

-----  
Statistical Thermodynamic AnalysisTemperature= 298.150 Kelvin Pressure= 1.00000 Atm  
=====

SCF Energy= -1167.59320279 Predicted Change= -1.483940D-06

Zero-point correction (ZPE)= -1167.5239 0.06924

Internal Energy (U)= -1167.5174 0.07577

Enthalpy (H)= -1167.5164 0.07671

Gibbs Free Energy (G)= -1167.5558 0.03736  
-----

Frequencies -- 120.3252 202.4454 245.4658

Supporting Information: **24dichloropyridine.out**

-----  
 Using Gaussian 03: IA32L-G03RevC.02 12-Jun-2004  
 =====

# opt freq b3lyp/6-311+g(d,p) geom=connectivity  
 #N Geom=AllCheck Guess=Read SCRF=Check GenChk RB3LYP/6-311+G(d,p) Freq  
 -----

Pointgroup= C1 Stoichiometry= C5H3Cl2N C1[X(C5H3Cl2N)] #Atoms= 11  
 Charge = 0 Multiplicity = 1  
 -----

SCF Energy= -1167.59777014 Predicted Change= -1.688143D-06  
 =====

Optimization completed. {Found 2 times}  
 Item Max Val. Criteria Pass? RMS Val. Criteria Pass?  
 Force 0.00043 || 0.00045 [ YES ] 0.00013 || 0.00030 [ YES ]  
 Displ 0.00147 || 0.00180 [ YES ] 0.00147 || 0.00180 [ YES ]  
 -----

Atomic Coordinates (Angstroms)  
 Type X Y Z  
 -----

|    |           |           |           |
|----|-----------|-----------|-----------|
| C  | 1.176355  | 0.024638  | -0.000173 |
| C  | -0.002619 | -0.721820 | -0.000069 |
| C  | -1.189083 | -0.001979 | 0.000144  |
| C  | -1.165059 | 1.390265  | 0.000259  |
| C  | 0.080481  | 2.006297  | 0.000172  |
| N  | 1.241803  | 1.340126  | -0.000048 |
| H  | 0.011039  | -1.801838 | -0.000155 |
| H  | -2.078061 | 1.969552  | 0.000418  |
| H  | 0.154317  | 3.088937  | 0.000244  |
| Cl | 2.705328  | -0.843535 | -0.000391 |
| Cl | -2.715937 | -0.851873 | 0.000262  |

## Statistical Thermodynamic Analysis

Temperature= 298.150 Kelvin Pressure= 1.00000 Atm  
 =====

SCF Energy= -1167.59777014 Predicted Change= -1.688143D-06  
 Zero-point correction (ZPE)= -1167.5285 0.06924  
 Internal Energy (U)= -1167.5219 0.07577  
 Enthalpy (H)= -1167.5210 0.07672  
 Gibbs Free Energy (G)= -1167.5604 0.03728  
 -----

Frequencies -- 157.6626 200.7835 202.4715



Supporting Information: **25dichloropyridine.out**

-----  
 Using Gaussian 03: IA32L-G03RevC.02 12-Jun-2004  
 =====

# opt nosymm freq ub3lyp/6-311+g(d,p) geom=connectivity  
 #N Geom=AllCheck Guess=Read SCRF=Check GenChk UB3LYP/6-311+G(d,p) Freq  
 -----

Pointgroup= C1 Stoichiometry= C5H3Cl2N C1[X(C5H3Cl2N)] #Atoms= 11  
 Charge = 0 Multiplicity = 1  
 -----

SCF Energy= -1167.59635090 Predicted Change= -1.713925D-07  
 =====

Optimization completed. {Found 2 times}  
 Item Max Val. Criteria Pass? RMS Val. Criteria Pass?  
 Force 0.00019 || 0.00045 [ YES ] 0.00004 || 0.00030 [ YES ]  
 Displ 0.00052 || 0.00180 [ YES ] 0.00052 || 0.00180 [ YES ]  
 -----

Atomic Coordinates (Angstroms)  
 Type X Y Z  
 -----

|    |           |           |           |
|----|-----------|-----------|-----------|
| C  | -1.339058 | -0.012703 | -0.000176 |
| C  | -0.699913 | 1.227990  | -0.000116 |
| C  | 0.688303  | 1.235583  | 0.000086  |
| C  | 1.357547  | 0.014312  | 0.000200  |
| C  | 0.621994  | -1.166252 | 0.000102  |
| N  | -0.714249 | -1.171792 | -0.000082 |
| H  | 1.239847  | 2.167297  | 0.000152  |
| H  | -1.269143 | 2.147512  | -0.000220 |
| H  | 1.117990  | -2.130536 | 0.000193  |
| Cl | -3.096928 | -0.059704 | -0.000468 |
| Cl | 3.106032  | -0.044424 | 0.000457  |

-----

## Statistical Thermodynamic Analysis

Temperature= 298.150 Kelvin Pressure= 1.00000 Atm  
 =====

SCF Energy= -1167.59635090 Predicted Change= -1.713925D-07  
 Zero-point correction (ZPE)= -1167.5271 0.06917  
 Internal Energy (U)= -1167.5206 0.07574  
 Enthalpy (H)= -1167.5196 0.07668  
 Gibbs Free Energy (G)= -1167.5591 0.03720  
 -----

Frequencies -- 95.3390 221.9742 300.3365

Supporting Information: **2chloro3radicalpyridine.out**

-----  
 Using Gaussian 03: IA32L-G03RevC.02 12-Jun-2004  
 =====

# opt nosymm freq ub3lyp/6-311+g(d,p) geom=connectivity  
 #N Geom=AllCheck Guess=Read SCRF=Check GenChk UB3LYP/6-311+G(d,p) Freq  
 -----

Pointgroup= C1 Stoichiometry= C5H3ClN(2) C1[X(C5H3ClN)] #Atoms= 10  
 Charge = 0 Multiplicity = 2  
 -----

SCF Energy= -707.285322740 Predicted Change= -1.863824D-06  
 =====

Optimization completed. {Found 1 times}  
 Item Max Val. Criteria Pass? RMS Val. Criteria Pass?  
 Force 0.00043 || 0.00045 [ YES ] 0.00014 || 0.00030 [ YES ]  
 Displ 0.00204 || 0.00180 [ NO ] 0.00204 || 0.00180 [ YES ]  
 -----

Atomic Coordinates (Angstroms)  
 Type X Y Z  
 -----

|    |           |           |           |
|----|-----------|-----------|-----------|
| C  | 0.011314  | -0.711325 | -0.000238 |
| C  | 0.021303  | 0.664171  | -0.000013 |
| C  | 1.181986  | 1.392598  | 0.000243  |
| C  | 2.379096  | 0.661069  | 0.000359  |
| C  | 2.296554  | -0.728159 | 0.000286  |
| N  | 1.140110  | -1.402163 | 0.000019  |
| H  | 1.182323  | 2.477206  | 0.000349  |
| H  | 3.341607  | 1.158844  | 0.000551  |
| H  | 3.194666  | -1.337102 | 0.000411  |
| Cl | -1.496859 | -1.601598 | -0.000138 |

-----

## Statistical Thermodynamic Analysis

Temperature= 298.150 Kelvin Pressure= 1.00000 Atm  
 =====

SCF Energy= -707.285322740 Predicted Change= -1.863824D-06  
 Zero-point correction (ZPE)= -707.2194 0.06590  
 Internal Energy (U)= -707.2140 0.07124  
 Enthalpy (H)= -707.2131 0.07219  
 Gibbs Free Energy (G)= -707.2497 0.03556  
 -----

Frequencies -- 176.9405 298.9632 418.8433

Supporting Information: **2chloro4radicalpyridine.out**

-----  
 Using Gaussian 03: IA32L-G03RevC.02 12-Jun-2004  
 =====

# opt nosymm freq ub3lyp/6-311+g(d,p) geom=connectivity  
 #N Geom=AllCheck Guess=Read SCRF=Check GenChk UB3LYP/6-311+G(d,p) Freq  
 -----

Pointgroup= C1 Stoichiometry= C5H3ClN(2) C1[X(C5H3ClN)] #Atoms= 10  
 Charge = 0 Multiplicity = 2  
 -----

SCF Energy= -707.287808390 Predicted Change= -2.670444D-07  
 =====

Optimization completed. {Found 2 times}  
 Item Max Val. Criteria Pass? RMS Val. Criteria Pass?  
 Force 0.00025 || 0.00045 [ YES ] 0.00006 || 0.00030 [ YES ]  
 Displ 0.00049 || 0.00180 [ YES ] 0.00049 || 0.00180 [ YES ]  
 -----

Atomic Coordinates (Angstroms)  
 Type X Y Z  
 -----

|    |           |           |           |
|----|-----------|-----------|-----------|
| C  | 1.177259  | 0.019603  | -0.000170 |
| C  | -0.008928 | -0.735829 | -0.000060 |
| C  | -1.148410 | 0.021710  | 0.000148  |
| C  | -1.180468 | 1.395284  | 0.000264  |
| C  | 0.077260  | 2.011021  | 0.000174  |
| N  | 1.230256  | 1.334369  | -0.000044 |
| H  | 0.009308  | -1.817578 | -0.000144 |
| H  | -2.091730 | 1.980093  | 0.000429  |
| H  | 0.156948  | 3.094320  | 0.000255  |
| Cl | 2.713799  | -0.840713 | -0.000390 |

-----

## Statistical Thermodynamic Analysis

Temperature= 298.150 Kelvin Pressure= 1.00000 Atm  
 =====

SCF Energy= -707.287808390 Predicted Change= -2.670444D-07  
 Zero-point correction (ZPE)= -707.2221 0.06561  
 Internal Energy (U)= -707.2168 0.07096  
 Enthalpy (H)= -707.2158 0.07191  
 Gibbs Free Energy (G)= -707.2525 0.03530  
 -----

Frequencies -- 171.7581 315.0497 418.4581

Supporting Information: **2chloro5radicalpyridine.out**

-----  
 Using Gaussian 03: IA32L-G03RevC.02 12-Jun-2004  
 =====

# opt nosymm freq ub3lyp/6-311+g(d,p) geom=connectivity  
 #N Geom=AllCheck Guess=Read SCRF=Check GenChk UB3LYP/6-311+G(d,p) Freq  
 -----

Pointgroup= C1 Stoichiometry= C5H3ClN(2) C1[X(C5H3ClN)] #Atoms= 10  
 Charge = 0 Multiplicity = 2  
 -----

SCF Energy= -707.284874929 Predicted Change= -5.156108D-07  
 =====

Optimization completed. {Found 2 times}  
 Item Max Val. Criteria Pass? RMS Val. Criteria Pass?  
 Force 0.00031 || 0.00045 [ YES ] 0.00007 || 0.00030 [ YES ]  
 Displ 0.00085 || 0.00180 [ YES ] 0.00085 || 0.00180 [ YES ]  
 -----

Atomic Coordinates (Angstroms)  
 Type X Y Z  
 -----

|    |           |           |           |
|----|-----------|-----------|-----------|
| C  | -1.330543 | -0.011073 | -0.000215 |
| C  | -0.700785 | 1.236819  | -0.000116 |
| C  | 0.695596  | 1.243323  | 0.000082  |
| C  | 1.315284  | 0.014998  | 0.000195  |
| C  | 0.636128  | -1.179328 | 0.000150  |
| N  | -0.712077 | -1.173867 | -0.000089 |
| H  | 1.247488  | 2.176787  | 0.000144  |
| H  | -1.276987 | 2.152900  | -0.000209 |
| H  | 1.121707  | -2.148053 | 0.000172  |
| Cl | -3.091738 | -0.060729 | -0.000450 |

-----

## Statistical Thermodynamic Analysis

Temperature= 298.150 Kelvin Pressure= 1.00000 Atm  
 =====

SCF Energy= -707.284874929 Predicted Change= -5.156108D-07  
 Zero-point correction (ZPE)= -707.2190 0.06581  
 Internal Energy (U)= -707.2137 0.07117  
 Enthalpy (H)= -707.2127 0.07211  
 Gibbs Free Energy (G)= -707.2493 0.03550  
 -----

Frequencies -- 188.4111 310.4813 406.9306

Supporting Information: **2chloropyridine.out**

-----  
 Using Gaussian 03: IA32L-G03RevC.02 12-Jun-2004  
 =====

# opt=(modredundant) freq b3lyp/6-31g(d) geom=connectivity  
 #N Geom=AllCheck Guess=Read SCRF=Check GenChk RB3LYP/6-31G(d) Freq  
 -----

Pointgroup= C1 Stoichiometry= C5H4ClN C1[X(C5H4ClN)] #Atoms= 11  
 Charge = 0 Multiplicity = 1  
 -----

SCF Energy= -707.883132725 Predicted Change= -8.885343D-07  
 =====

Optimization completed. {Found 2 times}  
 Item Max Val. Criteria Pass? RMS Val. Criteria Pass?  
 Force 0.00043 || 0.00045 [ YES ] 0.00009 || 0.00030 [ YES ]  
 Displ 0.00146 || 0.00180 [ YES ] 0.00146 || 0.00180 [ YES ]  
 -----

Atomic Coordinates (Angstroms)  
 Type X Y Z  
 -----

|    |           |           |           |
|----|-----------|-----------|-----------|
| C  | -0.469882 | -0.015670 | -0.000041 |
| C  | 0.197185  | 1.212709  | -0.000003 |
| C  | 1.589174  | 1.179347  | 0.000220  |
| C  | 2.240415  | -0.055755 | 0.000319  |
| C  | 1.460420  | -1.210271 | 0.000194  |
| N  | 0.119421  | -1.196715 | 0.000063  |
| H  | 2.154605  | 2.107117  | 0.000321  |
| H  | -0.355543 | 2.145012  | -0.000132 |
| H  | 3.323520  | -0.124222 | 0.000480  |
| H  | 1.922041  | -2.195485 | 0.000329  |
| Cl | -2.234379 | -0.012799 | -0.000328 |

-----

## Statistical Thermodynamic Analysis

Temperature= 298.150 Kelvin Pressure= 1.00000 Atm  
 =====

SCF Energy= -707.883132725 Predicted Change= -8.885343D-07  
 Zero-point correction (ZPE)= -707.8037 0.07936  
 Internal Energy (U)= -707.7984 0.08472  
 Enthalpy (H)= -707.7974 0.08567  
 Gibbs Free Energy (G)= -707.8334 0.04964  
 -----

Frequencies -- 177.5457 312.0599 420.4118

Supporting Information: **3chloropyridine.out**

-----  
 Using Gaussian 03: IA32L-G03RevC.02 12-Jun-2004  
 =====

# opt=(modredundant) freq b3lyp/6-31g(d) geom=connectivity  
 #N Geom=AllCheck Guess=Read SCRF=Check GenChk RB3LYP/6-31G(d) Freq  
 -----

Pointgroup= C1 Stoichiometry= C5H4ClN C1[X(C5H4ClN)] #Atoms= 11  
 Charge = 0 Multiplicity = 1  
 -----

SCF Energy= -707.879702154 Predicted Change= -4.904332D-08  
 =====

Optimization completed. {Found 2 times}  
 Item Max Val. Criteria Pass? RMS Val. Criteria Pass?  
 Force 0.00007 || 0.00045 [ YES ] 0.00002 || 0.00030 [ YES ]  
 Displ 0.00036 || 0.00180 [ YES ] 0.00036 || 0.00180 [ YES ]  
 -----

Atomic Coordinates (Angstroms)  
 Type X Y Z  
 -----

|    |           |           |           |
|----|-----------|-----------|-----------|
| C  | 0.208937  | -1.191843 | -0.000116 |
| C  | -0.491022 | 0.017229  | -0.000054 |
| C  | 0.210337  | 1.220261  | 0.000168  |
| C  | 1.602896  | 1.158025  | 0.000313  |
| C  | 2.219588  | -0.093874 | 0.000205  |
| N  | 1.543423  | -1.249116 | 0.000012  |
| H  | -0.317711 | 2.168281  | 0.000223  |
| H  | -0.329350 | -2.136943 | -0.000295 |
| H  | 2.197920  | 2.066444  | 0.000506  |
| H  | 3.304702  | -0.175173 | 0.000340  |
| Cl | -2.244938 | 0.009554  | -0.000233 |

-----

## Statistical Thermodynamic Analysis

Temperature= 298.150 Kelvin Pressure= 1.00000 Atm  
 =====

SCF Energy= -707.879702154 Predicted Change= -4.904332D-08  
 Zero-point correction (ZPE)= -707.8002 0.07944  
 Internal Energy (U)= -707.7948 0.08481  
 Enthalpy (H)= -707.7939 0.08576  
 Gibbs Free Energy (G)= -707.8299 0.04970  
 -----

Frequencies -- 190.1199 292.1596 414.8015

Supporting Information: **4chloropyridine.out**

-----  
 Using Gaussian 03: IA32L-G03RevC.02 12-Jun-2004  
 =====

# opt=(modredundant) freq b3lyp/6-31g(d) geom=connectivity  
 #N Geom=AllCheck Guess=Read SCRF=Check GenChk RB3LYP/6-31G(d) Freq  
 -----

Pointgroup= C1 Stoichiometry= C5H4ClN C1[X(C5H4ClN)] #Atoms= 11  
 Charge = 0 Multiplicity = 1  
 -----

SCF Energy= -707.880683575 Predicted Change= -8.240129D-07  
 =====

Optimization completed. {Found 2 times}  
 Item Max Val. Criteria Pass? RMS Val. Criteria Pass?  
 Force 0.00031 || 0.00045 [ YES ] 0.00009 || 0.00030 [ YES ]  
 Displ 0.00171 || 0.00180 [ YES ] 0.00171 || 0.00180 [ YES ]  
 -----

Atomic Coordinates (Angstroms)  
 Type X Y Z  
 -----

|    |           |           |           |
|----|-----------|-----------|-----------|
| C  | 1.593546  | -1.140396 | 0.000004  |
| C  | 0.199016  | -1.204472 | -0.000001 |
| C  | -0.499760 | 0.000015  | -0.000039 |
| C  | 0.199028  | 1.204485  | -0.000005 |
| C  | 1.593559  | 1.140383  | 0.000021  |
| N  | 2.294355  | -0.000011 | -0.000006 |
| H  | 2.174603  | -2.060773 | 0.000028  |
| H  | -0.318915 | -2.157023 | 0.000008  |
| H  | -0.318850 | 2.157065  | -0.000010 |
| H  | 2.174633  | 2.060747  | 0.000004  |
| Cl | -2.252017 | -0.000001 | 0.000008  |

-----

## Statistical Thermodynamic Analysis

Temperature= 298.150 Kelvin Pressure= 1.00000 Atm  
 =====

SCF Energy= -707.880683575 Predicted Change= -8.240129D-07  
 Zero-point correction (ZPE)= -707.8012 0.07946  
 Internal Energy (U)= -707.7958 0.08483  
 Enthalpy (H)= -707.7949 0.08577  
 Gibbs Free Energy (G)= -707.8309 0.04973  
 -----

Frequencies -- 188.5891 298.7225 392.8767

Supporting Information: **5chloro2radicalpyridine.out**

-----  
 Using Gaussian 03: IA32L-G03RevC.02 12-Jun-2004  
 =====

# opt nosymm freq ub3lyp/6-311+g(d,p) geom=connectivity  
 #N Geom=AllCheck Guess=Read SCRF=Check GenChk UB3LYP/6-311+G(d,p) Freq  
 -----

Pointgroup= C1 Stoichiometry= C5H3ClN(2) C1[X(C5H3ClN)] #Atoms= 10  
 Charge = 0 Multiplicity = 2  
 -----

SCF Energy= -707.291006743 Predicted Change= -7.307429D-07  
 =====

Optimization completed. {Found 2 times}  
 Item Max Val. Criteria Pass? RMS Val. Criteria Pass?  
 Force 0.00033 || 0.00045 [ YES ] 0.00009 || 0.00030 [ YES ]  
 Displ 0.00119 || 0.00180 [ YES ] 0.00119 || 0.00180 [ YES ]  
 -----

Atomic Coordinates (Angstroms)  
 Type X Y Z  
 -----

|    |           |           |           |
|----|-----------|-----------|-----------|
| C  | -1.315901 | -0.016021 | -0.000185 |
| C  | -0.712592 | 1.236795  | -0.000119 |
| C  | 0.680450  | 1.233704  | 0.000084  |
| C  | 1.351340  | 0.007298  | 0.000198  |
| C  | 0.632325  | -1.181516 | 0.000110  |
| N  | -0.713110 | -1.147853 | -0.000081 |
| H  | 1.241942  | 2.160532  | 0.000153  |
| H  | -1.279179 | 2.158555  | -0.000214 |
| H  | 1.123584  | -2.147083 | 0.000198  |
| Cl | 3.103770  | -0.038918 | 0.000452  |

## Statistical Thermodynamic Analysis

Temperature= 298.150 Kelvin Pressure= 1.00000 Atm  
 =====

SCF Energy= -707.291006743 Predicted Change= -7.307429D-07  
 Zero-point correction (ZPE)= -707.2249 0.06602  
 Internal Energy (U)= -707.2196 0.07140  
 Enthalpy (H)= -707.2186 0.07234  
 Gibbs Free Energy (G)= -707.2553 0.03569  
 -----

Frequencies -- 198.6656 294.8749 392.4833



Supporting Information: **pryidine\_2\_radical.out**

-----  
 Using Gaussian 03: IA32L-G03RevC.02 12-Jun-2004  
 =====

# opt nosymm freq ub3lyp/6-31g(d) geom=connectivity  
 #N Geom=AllCheck Guess=Read SCRF=Check GenChk UB3LYP/6-31G(d) Freq  
 -----

Pointgroup= C1 Stoichiometry= C5H4N(2) C1[X(C5H4N)] #Atoms= 10  
 Charge = 0 Multiplicity = 2  
 -----

SCF Energy= -247.606133480 Predicted Change= -1.784211D-07  
 =====

Optimization completed. {Found 2 times}  
 Item Max Val. Criteria Pass? RMS Val. Criteria Pass?  
 Force 0.00016 || 0.00045 [ YES ] 0.00004 || 0.00030 [ YES ]  
 Displ 0.00078 || 0.00180 [ YES ] 0.00078 || 0.00180 [ YES ]  
 -----

Atomic Coordinates (Angstroms)  
 Type X Y Z  
 -----

|   |           |           |           |
|---|-----------|-----------|-----------|
| C | -3.678370 | -0.294436 | 0.000067  |
| C | -2.286105 | -0.353842 | -0.000064 |
| C | -1.634786 | 0.881716  | -0.000269 |
| C | -2.390326 | 2.061959  | -0.000413 |
| C | -3.779009 | 1.972559  | -0.000336 |
| N | -4.399781 | 0.773304  | -0.000042 |
| H | -0.547919 | 0.927430  | -0.000336 |
| H | -1.741923 | -1.292307 | 0.000036  |
| H | -1.907015 | 3.034259  | -0.000582 |
| H | -4.411022 | 2.857428  | -0.000374 |

-----

## Statistical Thermodynamic Analysis

Temperature= 298.150 Kelvin Pressure= 1.00000 Atm  
 =====

SCF Energy= -247.606133480 Predicted Change= -1.784211D-07  
 Zero-point correction (ZPE)= -247.5300 0.07607  
 Internal Energy (U)= -247.5257 0.08034  
 Enthalpy (H)= -247.5248 0.08128  
 Gibbs Free Energy (G)= -247.5580 0.04810  
 -----

Frequencies -- 387.1699 425.9196 574.5152

Supporting Information: **pryidine\_3\_radical.out**

-----  
 Using Gaussian 03: IA32L-G03RevC.02 12-Jun-2004  
 =====

# opt nosymm freq ub3lyp/6-31g(d) geom=connectivity  
 #N Geom=AllCheck Guess=Read SCRF=Check GenChk UB3LYP/6-31G(d) Freq  
 -----

Pointgroup= C1 Stoichiometry= C5H4N(2) C1[X(C5H4N)] #Atoms= 10  
 Charge = 0 Multiplicity = 2  
 -----

SCF Energy= -247.596916082 Predicted Change= -6.977176D-07  
 =====

Optimization completed. {Found 2 times}  
 Item Max Val. Criteria Pass? RMS Val. Criteria Pass?  
 Force 0.00044 || 0.00045 [ YES ] 0.00009 || 0.00030 [ YES ]  
 Displ 0.00092 || 0.00180 [ YES ] 0.00092 || 0.00180 [ YES ]  
 -----

Atomic Coordinates (Angstroms)  
 Type X Y Z  
 -----

|   |           |           |           |
|---|-----------|-----------|-----------|
| C | -3.704393 | -0.352771 | -0.000050 |
| C | -2.324718 | -0.290388 | -0.000144 |
| C | -1.615486 | 0.889656  | -0.000373 |
| C | -2.377982 | 2.066670  | -0.000411 |
| C | -3.770176 | 1.950227  | -0.000273 |
| N | -4.426608 | 0.784378  | -0.000116 |
| H | -0.528685 | 0.919635  | -0.000406 |
| H | -4.257723 | -1.288422 | 0.000151  |
| H | -1.903616 | 3.044854  | -0.000528 |
| H | -4.394025 | 2.842310  | -0.000303 |

-----

## Statistical Thermodynamic Analysis

Temperature= 298.150 Kelvin Pressure= 1.00000 Atm  
 =====

SCF Energy= -247.596916082 Predicted Change= -6.977176D-07  
 Zero-point correction (ZPE)= -247.5209 0.07596  
 Internal Energy (U)= -247.5167 0.08021  
 Enthalpy (H)= -247.5157 0.08116  
 Gibbs Free Energy (G)= -247.5489 0.04798  
 -----

Frequencies -- 391.3222 423.8404 577.5052

Supporting Information: **pryidine\_4\_radical.out**

-----  
 Using Gaussian 03: IA32L-G03RevC.02 12-Jun-2004  
 =====

# opt nosymm freq ub3lyp/6-31g(d) geom=connectivity  
 #N Geom=AllCheck Guess=Read SCRF=Check GenChk UB3LYP/6-31G(d) Freq  
 -----

Pointgroup= C1 Stoichiometry= C5H4N(2) C1[X(C5H4N)] #Atoms= 10  
 Charge = 0 Multiplicity = 2  
 -----

SCF Energy= -247.598750879 Predicted Change= -1.029398D-07  
 =====

Optimization completed. {Found 2 times}  
 Item Max Val. Criteria Pass? RMS Val. Criteria Pass?  
 Force 0.00011 || 0.00045 [ YES ] 0.00003 || 0.00030 [ YES ]  
 Displ 0.00055 || 0.00180 [ YES ] 0.00055 || 0.00180 [ YES ]  
 -----

Atomic Coordinates (Angstroms)  
 Type X Y Z  
 -----

|   |           |           |           |
|---|-----------|-----------|-----------|
| C | -3.692658 | -0.333318 | -0.000022 |
| C | -2.285977 | -0.350756 | 0.000100  |
| C | -1.682815 | 0.885217  | -0.000047 |
| C | -2.374459 | 2.073933  | -0.000254 |
| C | -3.776090 | 1.954052  | -0.000288 |
| N | -4.423157 | 0.785245  | -0.000202 |
| H | -4.244874 | -1.272691 | 0.000072  |
| H | -1.740019 | -1.289616 | 0.000257  |
| H | -1.898517 | 3.050146  | -0.000376 |
| H | -4.395349 | 2.850652  | -0.000480 |

-----

## Statistical Thermodynamic Analysis

Temperature= 298.150 Kelvin Pressure= 1.00000 Atm  
 =====

SCF Energy= -247.598750879 Predicted Change= -1.029398D-07  
 Zero-point correction (ZPE)= -247.5229 0.07575  
 Internal Energy (U)= -247.5187 0.08000  
 Enthalpy (H)= -247.5178 0.08094  
 Gibbs Free Energy (G)= -247.5509 0.04778  
 -----

Frequencies -- 379.6164 445.9565 616.3706

**Chloropyrimidines**Supporting Information: **24dichloropyrimidine.out**-----  
Using Gaussian 03: AM64L-G03RevC.02 12-Jun-2004  
=====# opt=(modredundant) freq ub3lyp/6-31g(d) geom=connectivity  
#N Geom=AllCheck Guess=Read SCRF=Check GenChk UB3LYP/6-31G(d) Freq  
-----Pointgroup= C1 Stoichiometry= C4H2Cl2N2 C1[X(C4H2Cl2N2)] #Atoms= 10  
Charge = 0 Multiplicity = 1  
-----SCF Energy= -1183.51604322 Predicted Change= -3.327912D-07  
=====Optimization completed. {Found 2 times}  
Item Max Val. Criteria Pass? RMS Val. Criteria Pass?  
Force 0.00022 || 0.00045 [ YES ] 0.00006 || 0.00030 [ YES ]  
Displ 0.00052 || 0.00180 [ YES ] 0.00052 || 0.00180 [ YES ]  
-----Atomic Coordinates (Angstroms)  
Type X Y Z  
-----

|    |           |           |           |
|----|-----------|-----------|-----------|
| C  | -1.118308 | 0.024822  | 0.000061  |
| N  | 0.002373  | -0.694172 | 0.000024  |
| C  | 1.124896  | 0.006583  | 0.000009  |
| C  | 1.158550  | 1.401818  | 0.000013  |
| C  | -0.085923 | 2.023735  | 0.000017  |
| N  | -1.242039 | 1.345077  | 0.000029  |
| H  | 2.087600  | 1.957549  | 0.000004  |
| H  | -0.167264 | 3.108435  | 0.000006  |
| Cl | -2.606131 | -0.890948 | -0.000048 |
| Cl | 2.622721  | -0.895173 | -0.000010 |

-----  
Statistical Thermodynamic AnalysisTemperature= 298.150 Kelvin Pressure= 1.00000 Atm  
=====SCF Energy= -1183.51604322 Predicted Change= -3.327912D-07  
Zero-point correction (ZPE)= -1183.4583 0.05766  
Internal Energy (U)= -1183.4520 0.06404  
Enthalpy (H)= -1183.4510 0.06498  
Gibbs Free Energy (G)= -1183.4902 0.02576  
-----

Frequencies -- 162.2527 174.6543 210.3685

Supporting Information: **25dichloropyrimidine.out**

-----  
 Using Gaussian 03: AM64L-G03RevC.02 12-Jun-2004  
 =====

# opt=(modredundant) freq ub3lyp/6-31g(d) geom=connectivity  
 #N Geom=AllCheck Guess=Read SCRF=Check GenChk UB3LYP/6-31G(d) Freq  
 -----

Pointgroup= C1 Stoichiometry= C4H2Cl2N2 C1[X(C4H2Cl2N2)] #Atoms= 10  
 Charge = 0 Multiplicity = 1  
 -----

SCF Energy= -1183.51132781 Predicted Change= -1.970251D-07  
 =====

Optimization completed. {Found 2 times}  
 Item Max Val. Criteria Pass? RMS Val. Criteria Pass?  
 Force 0.00018 || 0.00045 [ YES ] 0.00004 || 0.00030 [ YES ]  
 Displ 0.00070 || 0.00180 [ YES ] 0.00070 || 0.00180 [ YES ]  
 -----

Atomic Coordinates (Angstroms)  
 Type X Y Z  
 -----

|    |           |           |           |
|----|-----------|-----------|-----------|
| C  | -1.307887 | 0.000001  | 0.000027  |
| N  | -0.724385 | 1.194343  | 0.000013  |
| C  | 0.611304  | 1.190785  | 0.000002  |
| C  | 1.337437  | 0.000000  | -0.000002 |
| C  | 0.611302  | -1.190785 | 0.000001  |
| N  | -0.724385 | -1.194343 | 0.000010  |
| H  | 1.110381  | 2.156893  | 0.000000  |
| H  | 1.110380  | -2.156893 | -0.000006 |
| Cl | -3.055200 | 0.000000  | -0.000007 |
| Cl | 3.079182  | 0.000000  | -0.000012 |

-----

## Statistical Thermodynamic Analysis

Temperature= 298.150 Kelvin Pressure= 1.00000 Atm  
 =====

SCF Energy= -1183.51132781 Predicted Change= -1.970251D-07  
 Zero-point correction (ZPE)= -1183.4536 0.05770  
 Internal Energy (U)= -1183.4472 0.06412  
 Enthalpy (H)= -1183.4462 0.06507  
 Gibbs Free Energy (G)= -1183.4855 0.02577  
 -----

Frequencies -- 88.7639 222.1060 311.4229

Supporting Information: **2chloro4radicalpyrimidine.out**

-----  
 Using Gaussian 03: IA32L-G03RevC.02 12-Jun-2004  
 =====

# opt nosymm freq ub3lyp/6-31g(d) geom=connectivity  
 #N Geom=AllCheck Guess=Read SCRF=Check GenChk UB3LYP/6-31G(d) Freq  
 -----

Pointgroup= C1 Stoichiometry= C4H2ClN2(2) C1[X(C4H2ClN2)] #Atoms= 9  
 Charge = 0 Multiplicity = 2  
 -----

SCF Energy= -723.240970761 Predicted Change= -2.468860D-08  
 =====

Optimization completed. {Found 2 times}  
 Item Max Val. Criteria Pass? RMS Val. Criteria Pass?  
 Force 0.00006 || 0.00045 [ YES ] 0.00001 || 0.00030 [ YES ]  
 Displ 0.00023 || 0.00180 [ YES ] 0.00023 || 0.00180 [ YES ]  
 -----

Atomic Coordinates (Angstroms)  
 Type X Y Z  
 -----

|    |           |           |          |
|----|-----------|-----------|----------|
| C  | -1.134078 | 0.019681  | 0.000001 |
| N  | 0.012823  | -0.677418 | 0.000010 |
| C  | 1.103534  | 0.013196  | 0.000016 |
| C  | 1.172552  | 1.401398  | 0.000018 |
| C  | -0.080205 | 2.019563  | 0.000014 |
| N  | -1.236096 | 1.337268  | 0.000008 |
| H  | 2.098567  | 1.963518  | 0.000023 |
| H  | -0.168351 | 3.104876  | 0.000017 |
| Cl | -2.614991 | -0.899182 | 0.000008 |

-----  
 Statistical Thermodynamic Analysis

Temperature= 298.150 Kelvin Pressure= 1.00000 Atm  
 =====

SCF Energy= -723.240970761 Predicted Change= -2.468860D-08  
 Zero-point correction (ZPE)= -723.1864 0.05448  
 Internal Energy (U)= -723.1812 0.05967  
 Enthalpy (H)= -723.1803 0.06062  
 Gibbs Free Energy (G)= -723.2167 0.02423  
 -----

Frequencies -- 160.9794 329.9945 426.5051

Supporting Information: **2chloro5radicalpyrimidine.out**

-----  
 Using Gaussian 03: IA32L-G03RevC.02 12-Jun-2004  
 =====

# opt nosymm freq ub3lyp/6-31g(d) geom=connectivity  
 #N Geom=AllCheck Guess=Read SCRF=Check GenChk UB3LYP/6-31G(d) Freq  
 -----

Pointgroup= C1 Stoichiometry= C4H2ClN2(2) C1[X(C4H2ClN2)] #Atoms= 9  
 Charge = 0 Multiplicity = 2  
 -----

SCF Energy= -723.227979949 Predicted Change= -3.613127D-07  
 =====

Optimization completed. {Found 2 times}  
 Item Max Val. Criteria Pass? RMS Val. Criteria Pass?  
 Force 0.00029 || 0.00045 [ YES ] 0.00007 || 0.00030 [ YES ]  
 Displ 0.00123 || 0.00180 [ YES ] 0.00123 || 0.00180 [ YES ]  
 -----

Atomic Coordinates (Angstroms)  
 Type X Y Z  
 -----

|    |           |           |           |
|----|-----------|-----------|-----------|
| C  | -1.299254 | 0.000000  | -0.000099 |
| N  | -0.724709 | 1.199258  | -0.000025 |
| C  | 0.622425  | 1.200014  | 0.000015  |
| C  | 1.300009  | 0.000000  | 0.000017  |
| C  | 0.622425  | -1.200014 | 0.000009  |
| N  | -0.724709 | -1.199257 | -0.000028 |
| H  | 1.111986  | 2.170378  | 0.000027  |
| H  | 1.111985  | -2.170378 | 0.000024  |
| Cl | -3.051212 | 0.000001  | 0.000098  |

## Statistical Thermodynamic Analysis

Temperature= 298.150 Kelvin Pressure= 1.00000 Atm  
 =====

SCF Energy= -723.227979949 Predicted Change= -3.613127D-07  
 Zero-point correction (ZPE)= -723.1734 0.05448  
 Internal Energy (U)= -723.1682 0.05970  
 Enthalpy (H)= -723.1673 0.06064  
 Gibbs Free Energy (G)= -723.2037 0.02423  
 -----

Frequencies -- 176.3972 325.4457 403.8496

Supporting Information: **2chloropyrimidine.out**

-----  
 Using Gaussian 03: IA32L-G03RevC.02 12-Jun-2004  
 =====

# opt=(modredundant) freq b3lyp/6-31g(d) geom=connectivity  
 #N Geom=AllCheck Guess=Read SCRF=Check GenChk RB3LYP/6-31G(d) Freq  
 -----

Pointgroup= C1 Stoichiometry= C4H3ClN2 C1[X(C4H3ClN2)] #Atoms= 10  
 Charge = 0 Multiplicity = 1  
 -----

SCF Energy= -723.919929744 Predicted Change= -4.189523D-07  
 =====

Optimization completed. {Found 2 times}  
 Item Max Val. Criteria Pass? RMS Val. Criteria Pass?  
 Force 0.00028 || 0.00045 [ YES ] 0.00007 || 0.00030 [ YES ]  
 Displ 0.00081 || 0.00180 [ YES ] 0.00081 || 0.00180 [ YES ]  
 -----

Atomic Coordinates (Angstroms)  
 Type X Y Z  
 -----

|    |           |           |           |
|----|-----------|-----------|-----------|
| C  | 0.444394  | -0.000001 | 0.000031  |
| N  | -0.133807 | -1.196133 | 0.000012  |
| C  | -1.472848 | -1.182728 | -0.000002 |
| C  | -2.209087 | 0.000000  | -0.000006 |
| C  | -1.472846 | 1.182729  | -0.000002 |
| N  | -0.133806 | 1.196133  | 0.000009  |
| H  | -1.959361 | -2.156189 | -0.000003 |
| H  | -3.293364 | 0.000001  | -0.000013 |
| H  | -1.959359 | 2.156190  | -0.000010 |
| Cl | 2.196924  | 0.000000  | -0.000014 |

-----

## Statistical Thermodynamic Analysis

Temperature= 298.150 Kelvin Pressure= 1.00000 Atm  
 =====

SCF Energy= -723.919929744 Predicted Change= -4.189523D-07  
 Zero-point correction (ZPE)= -723.8525 0.06742  
 Internal Energy (U)= -723.8472 0.07266  
 Enthalpy (H)= -723.8463 0.07360  
 Gibbs Free Energy (G)= -723.8821 0.03774  
 -----

Frequencies -- 160.2916 329.6297 414.8915



Supporting Information: **4chloro2radicalpyrimidine.out**

-----  
 Using Gaussian 03: IA32L-G03RevC.02 12-Jun-2004  
 =====

# opt nosymm freq ub3lyp/6-31g(d) geom=connectivity  
 #N Geom=AllCheck Guess=Read SCRF=Check GenChk UB3LYP/6-31G(d) Freq  
 -----

Pointgroup= C1 Stoichiometry= C4H2ClN2(2) C1[X(C4H2ClN2)] #Atoms= 9  
 Charge = 0 Multiplicity = 2  
 -----

SCF Energy= -723.238835336 Predicted Change= -5.138057D-07  
 =====

Optimization completed. {Found 2 times}  
 Item Max Val. Criteria Pass? RMS Val. Criteria Pass?  
 Force 0.00029 || 0.00045 [ YES ] 0.00008 || 0.00030 [ YES ]  
 Displ 0.00103 || 0.00180 [ YES ] 0.00103 || 0.00180 [ YES ]  
 -----

Atomic Coordinates (Angstroms)  
 Type X Y Z  
 -----

|    |           |           |           |
|----|-----------|-----------|-----------|
| C  | -1.091515 | 0.041278  | 0.000040  |
| N  | -0.006918 | -0.699498 | 0.000031  |
| C  | 1.126587  | -0.001760 | 0.000017  |
| C  | 1.148905  | 1.396442  | 0.000007  |
| C  | -0.090224 | 2.031749  | 0.000019  |
| N  | -1.247372 | 1.337573  | 0.000037  |
| H  | 2.079244  | 1.950588  | -0.000008 |
| H  | -0.165724 | 3.116966  | 0.000014  |
| Cl | 2.629623  | -0.894664 | -0.000005 |

-----

## Statistical Thermodynamic Analysis

Temperature= 298.150 Kelvin Pressure= 1.00000 Atm  
 =====

SCF Energy= -723.238835336 Predicted Change= -5.138057D-07  
 Zero-point correction (ZPE)= -723.1843 0.05448  
 Internal Energy (U)= -723.1791 0.05970  
 Enthalpy (H)= -723.1781 0.06064  
 Gibbs Free Energy (G)= -723.2146 0.02420  
 -----

Frequencies -- 171.1117 316.0028 391.4749

Supporting Information: **4chloropyrimidine.out**

-----  
 Using Gaussian 03: IA32L-G03RevC.02 12-Jun-2004  
 =====

# opt=(modredundant) freq b3lyp/6-31g(d) geom=connectivity  
 #N Geom=AllCheck Guess=Read SCRF=Check GenChk RB3LYP/6-31G(d) Freq  
 -----

Pointgroup= C1 Stoichiometry= C4H3ClN2 C1[X(C4H3ClN2)] #Atoms= 10  
 Charge = 0 Multiplicity = 1  
 -----

SCF Energy= -723.921479992 Predicted Change= -2.864851D-07  
 =====

Optimization completed. {Found 2 times}  
 Item Max Val. Criteria Pass? RMS Val. Criteria Pass?  
 Force 0.00017 || 0.00045 [ YES ] 0.00005 || 0.00030 [ YES ]  
 Displ 0.00051 || 0.00180 [ YES ] 0.00051 || 0.00180 [ YES ]  
 -----

Atomic Coordinates (Angstroms)  
 Type X Y Z  
 -----

|    |           |           |           |
|----|-----------|-----------|-----------|
| C  | -1.480500 | -1.149822 | 0.000008  |
| N  | -0.140267 | -1.186014 | 0.000002  |
| C  | 0.464525  | -0.011134 | 0.000008  |
| C  | -0.218781 | 1.205572  | 0.000004  |
| C  | -1.607287 | 1.108579  | 0.000005  |
| N  | -2.255786 | -0.064769 | 0.000008  |
| H  | -1.983451 | -2.114078 | 0.000001  |
| H  | 0.297826  | 2.157773  | 0.000002  |
| H  | -2.223847 | 2.005516  | 0.000009  |
| Cl | 2.219653  | -0.012524 | -0.000014 |

-----

## Statistical Thermodynamic Analysis

Temperature= 298.150 Kelvin Pressure= 1.00000 Atm  
 =====

SCF Energy= -723.921479992 Predicted Change= -2.864851D-07  
 Zero-point correction (ZPE)= -723.8538 0.06762  
 Internal Energy (U)= -723.8486 0.07286  
 Enthalpy (H)= -723.8476 0.07381  
 Gibbs Free Energy (G)= -723.8835 0.03793  
 -----

Frequencies -- 172.3193 314.1974 384.2936

Supporting Information: **5chloro2radicalpyrimidine.out**

-----  
 Using Gaussian 03: IA32L-G03RevC.02 12-Jun-2004  
 =====

# opt nosymm freq ub3lyp/6-31g(d) geom=connectivity  
 #N Geom=AllCheck Guess=Read SCRF=Check GenChk UB3LYP/6-31G(d) Freq  
 -----

Pointgroup= C1 Stoichiometry= C4H2ClN2(2) C1[X(C4H2ClN2)] #Atoms= 9  
 Charge = 0 Multiplicity = 2  
 -----

SCF Energy= -723.233317228 Predicted Change= -3.717589D-07  
 =====

Optimization completed. {Found 2 times}  
 Item Max Val. Criteria Pass? RMS Val. Criteria Pass?  
 Force 0.00025 || 0.00045 [ YES ] 0.00006 || 0.00030 [ YES ]  
 Displ 0.00074 || 0.00180 [ YES ] 0.00074 || 0.00180 [ YES ]  
 -----

Atomic Coordinates (Angstroms)  
 Type X Y Z  
 -----

|    |           |           |           |
|----|-----------|-----------|-----------|
| C  | -1.278147 | 0.000001  | 0.000018  |
| N  | -0.734102 | 1.190957  | 0.000015  |
| C  | 0.610040  | 1.198500  | 0.000005  |
| C  | 1.327226  | 0.000000  | -0.000002 |
| C  | 0.610039  | -1.198500 | 0.000002  |
| N  | -0.734103 | -1.190957 | 0.000013  |
| H  | 1.114800  | 2.161540  | 0.000002  |
| H  | 1.114800  | -2.161540 | -0.000004 |
| Cl | 3.072776  | -0.000001 | -0.000016 |

-----

## Statistical Thermodynamic Analysis

Temperature= 298.150 Kelvin Pressure= 1.00000 Atm  
 =====

SCF Energy= -723.233317228 Predicted Change= -3.717589D-07  
 Zero-point correction (ZPE)= -723.1788 0.05448  
 Internal Energy (U)= -723.1735 0.05975  
 Enthalpy (H)= -723.1726 0.06070  
 Gibbs Free Energy (G)= -723.2091 0.02418  
 -----

Frequencies -- 200.9630 288.0994 394.6121

Supporting Information: **5chloropyrimidine.out**

-----  
 Using Gaussian 03: IA32L-G03RevC.02 12-Jun-2004  
 =====

# opt=(modredundant) freq b3lyp/6-31g(d) geom=connectivity  
 #N Geom=AllCheck Guess=Read SCRF=Check GenChk RB3LYP/6-31G(d) Freq  
 -----

Pointgroup= C1 Stoichiometry= C4H3ClN2 C1[X(C4H3ClN2)] #Atoms= 10  
 Charge = 0 Multiplicity = 1  
 -----

SCF Energy= -723.916869688 Predicted Change= -7.406350D-08  
 =====

Optimization completed. {Found 2 times}  
 Item Max Val. Criteria Pass? RMS Val. Criteria Pass?  
 Force 0.00006 || 0.00045 [ YES ] 0.00003 || 0.00030 [ YES ]  
 Displ 0.00064 || 0.00180 [ YES ] 0.00064 || 0.00180 [ YES ]  
 -----

Atomic Coordinates (Angstroms)  
 Type X Y Z  
 -----

|    |           |           |           |
|----|-----------|-----------|-----------|
| C  | 2.173564  | -0.000001 | 0.000004  |
| N  | 1.577300  | -1.196708 | 0.000002  |
| C  | 0.241170  | -1.192972 | 0.000000  |
| C  | -0.480926 | 0.000000  | -0.000002 |
| C  | 0.241171  | 1.192973  | -0.000004 |
| N  | 1.577300  | 1.196709  | 0.000000  |
| H  | -0.265663 | -2.155620 | 0.000002  |
| H  | 3.261076  | 0.000001  | 0.000001  |
| H  | -0.265663 | 2.155620  | -0.000002 |
| Cl | -2.227166 | 0.000000  | 0.000000  |

-----

## Statistical Thermodynamic Analysis

Temperature= 298.150 Kelvin Pressure= 1.00000 Atm  
 =====

SCF Energy= -723.916869688 Predicted Change= -7.406350D-08  
 Zero-point correction (ZPE)= -723.8492 0.06765  
 Internal Energy (U)= -723.8439 0.07293  
 Enthalpy (H)= -723.8429 0.07388  
 Gibbs Free Energy (G)= -723.8789 0.03794  
 -----

Frequencies -- 186.2103 286.8821 418.8268

**Chloropyrroles**Supporting Information: **23dichloropyrrole.out**-----  
Using Gaussian 03: AM64L-G03RevC.02 12-Jun-2004  
=====# opt=(modredundant) freq ub3lyp/6-31g(d) geom=connectivity  
#N Geom=AllCheck Guess=Read SCRF=Check GenChk UB3LYP/6-31G(d) Freq  
-----Pointgroup= C1 Stoichiometry= C4H3Cl2N C1[X(C4H3Cl2N)] #Atoms= 10  
Charge = 0 Multiplicity = 1  
-----SCF Energy= -1129.35035175 Predicted Change= -2.039637D-07  
=====Optimization completed. {Found 2 times}  
Item Max Val. Criteria Pass? RMS Val. Criteria Pass?  
Force 0.00019 || 0.00045 [ YES ] 0.00005 || 0.00030 [ YES ]  
Displ 0.00076 || 0.00180 [ YES ] 0.00076 || 0.00180 [ YES ]  
-----Atomic Coordinates (Angstroms)  
Type X Y Z  
-----

|    |           |           |           |
|----|-----------|-----------|-----------|
| C  | 0.466816  | 2.228235  | 0.000101  |
| C  | -0.809433 | 1.712990  | 0.000173  |
| C  | -0.686247 | 0.294898  | 0.000011  |
| C  | 0.659188  | -0.007177 | -0.000006 |
| N  | 1.354007  | 1.176445  | 0.000032  |
| H  | 2.360594  | 1.243100  | -0.000109 |
| H  | 0.816717  | 3.249779  | 0.000140  |
| H  | -1.734246 | 2.271243  | 0.000280  |
| Cl | 1.473510  | -1.524391 | -0.000103 |
| Cl | -1.985455 | -0.850487 | -0.000026 |

-----  
Statistical Thermodynamic AnalysisTemperature= 298.150 Kelvin Pressure= 1.00000 Atm  
=====SCF Energy= -1129.35035175 Predicted Change= -2.039637D-07  
Zero-point correction (ZPE)= -1129.2864 0.06393  
Internal Energy (U)= -1129.2801 0.07018  
Enthalpy (H)= -1129.2792 0.07113  
Gibbs Free Energy (G)= -1129.3176 0.03268  
-----

Frequencies -- 165.1609 195.1938 240.7339

Supporting Information: **2chloro3radicalpyrrole.out**

-----  
 Using Gaussian 03: IA32L-G03RevC.02 12-Jun-2004  
 =====

# opt=(modredundant) freq ub3lyp/6-31g(d) geom=connectivity  
 #N Geom=AllCheck Guess=Read SCRF=Check GenChk UB3LYP/6-31G(d) Freq  
 -----

Pointgroup= C1 Stoichiometry= C4H3ClN(2) C1[X(C4H3ClN)] #Atoms= 9  
 Charge = 0 Multiplicity = 2  
 -----

SCF Energy= -669.059113620 Predicted Change= -2.734261D-07  
 =====

Optimization completed. {Found 2 times}  
 Item Max Val. Criteria Pass? RMS Val. Criteria Pass?  
 Force 0.00015 || 0.00045 [ YES ] 0.00005 || 0.00030 [ YES ]  
 Displ 0.00138 || 0.00180 [ YES ] 0.00138 || 0.00180 [ YES ]  
 -----

Atomic Coordinates (Angstroms)  
 Type X Y Z  
 -----

|    |           |           |           |
|----|-----------|-----------|-----------|
| C  | -1.842212 | 0.652391  | 0.000140  |
| C  | -1.930882 | -0.728599 | 0.000117  |
| C  | -0.596531 | -1.191510 | 0.000087  |
| C  | 0.264366  | -0.131437 | -0.000013 |
| N  | -0.511944 | 1.009380  | -0.000031 |
| H  | -0.149752 | 1.951805  | -0.000181 |
| H  | -2.616072 | 1.407002  | 0.000198  |
| H  | -2.839391 | -1.313325 | 0.000188  |
| Cl | 1.989434  | -0.042130 | -0.000116 |

-----  
 Statistical Thermodynamic Analysis

Temperature= 298.150 Kelvin Pressure= 1.00000 Atm  
 =====

SCF Energy= -669.059113620 Predicted Change= -2.734261D-07  
 Zero-point correction (ZPE)= -668.9986 0.06048  
 Internal Energy (U)= -668.9935 0.06561  
 Enthalpy (H)= -668.9925 0.06655  
 Gibbs Free Energy (G)= -669.0282 0.03088  
 -----

Frequencies -- 196.3571 301.7503 381.4914

Supporting Information: **2chloropyrrole2.out**

-----  
 Using Gaussian 03: AM64L-G03RevC.02 12-Jun-2004  
 =====

# opt freq b3lyp/6-31g(d) geom=connectivity  
 #N Geom=AllCheck Guess=Read SCRF=Check GenChk RB3LYP/6-31G(d) Freq  
 -----

Pointgroup= C1 Stoichiometry= C4H4ClN C1[X(C4H4ClN)] #Atoms= 10  
 Charge = 0 Multiplicity = 1  
 -----

SCF Energy= -669.759073228 Predicted Change= -1.160505D-07  
 =====

Optimization completed. {Found 2 times}  
 Item Max Val. Criteria Pass? RMS Val. Criteria Pass?  
 Force 0.00013 || 0.00045 [ YES ] 0.00003 || 0.00030 [ YES ]  
 Displ 0.00062 || 0.00180 [ YES ] 0.00062 || 0.00180 [ YES ]  
 -----

Atomic Coordinates (Angstroms)  
 Type X Y Z  
 -----

|    |           |           |           |
|----|-----------|-----------|-----------|
| C  | 1.832165  | -0.713209 | 0.000063  |
| C  | 1.913868  | 0.661372  | 0.000181  |
| C  | 0.585035  | 1.180161  | -0.000059 |
| C  | -0.255281 | 0.091625  | -0.000002 |
| N  | 0.497273  | -1.054999 | -0.000002 |
| H  | 0.119062  | -1.989941 | -0.000157 |
| H  | 2.598651  | -1.474154 | 0.000105  |
| H  | 2.826907  | 1.240876  | 0.000316  |
| H  | 0.279328  | 2.216282  | -0.000120 |
| Cl | -1.985858 | 0.004249  | -0.000072 |

-----

## Statistical Thermodynamic Analysis

Temperature= 298.150 Kelvin Pressure= 1.00000 Atm  
 =====

SCF Energy= -669.759073228 Predicted Change= -1.160505D-07  
 Zero-point correction (ZPE)= -669.6858 0.07325  
 Internal Energy (U)= -669.6807 0.07834  
 Enthalpy (H)= -669.6797 0.07929  
 Gibbs Free Energy (G)= -669.7147 0.04434  
 -----

Frequencies -- 216.0730 301.1782 423.1323

Supporting Information: **3chloro2radicalpyrrole.out**

-----  
 Using Gaussian 03: IA32L-G03RevC.02 12-Jun-2004  
 =====

# opt=(modredundant) freq ub3lyp/6-31g(d) geom=connectivity  
 #N Geom=AllCheck Guess=Read SCRF=Check GenChk UB3LYP/6-31G(d) Freq  
 -----

Pointgroup= C1 Stoichiometry= C4H3ClN(2) C1[X(C4H3ClN)] #Atoms= 9  
 Charge = 0 Multiplicity = 2  
 -----

SCF Energy= -669.057895933 Predicted Change= -3.917482D-07  
 =====

Optimization completed. {Found 1 times}  
 Item Max Val. Criteria Pass? RMS Val. Criteria Pass?  
 Force 0.00015 || 0.00045 [ YES ] 0.00005 || 0.00030 [ YES ]  
 Displ 0.00203 || 0.00180 [ NO ] 0.00203 || 0.00180 [ YES ]  
 -----

Atomic Coordinates (Angstroms)  
 Type X Y Z  
 -----

|    |           |           |           |
|----|-----------|-----------|-----------|
| C  | 1.859817  | 0.664361  | 0.000141  |
| C  | 0.557961  | 1.112701  | -0.000007 |
| C  | -0.293661 | -0.038115 | 0.000025  |
| C  | 0.537871  | -1.125342 | -0.000106 |
| N  | 1.836283  | -0.720428 | -0.000130 |
| H  | 2.640799  | -1.328031 | -0.000255 |
| H  | 2.794869  | 1.205574  | 0.000287  |
| H  | 0.227781  | 2.142340  | 0.000025  |
| Cl | -2.028786 | -0.038737 | 0.000031  |

-----

## Statistical Thermodynamic Analysis

Temperature= 298.150 Kelvin Pressure= 1.00000 Atm  
 =====

SCF Energy= -669.057895933 Predicted Change= -3.917482D-07  
 Zero-point correction (ZPE)= -668.9983 0.05955  
 Internal Energy (U)= -668.9935 0.06431  
 Enthalpy (H)= -668.9926 0.06526  
 Gibbs Free Energy (G)= -669.0276 0.03025  
 -----

Frequencies -- -124.5800 296.4148 311.4582



Supporting Information: **3chloropyrrole.out**

-----  
 Using Gaussian 03: AM64L-G03RevC.02 12-Jun-2004  
 =====

# opt=(modredundant) freq b3lyp/6-31g(d) geom=connectivity  
 #N Geom=AllCheck Guess=Read SCRF=Check GenChk RB3LYP/6-31G(d) Freq  
 -----

Pointgroup= C1 Stoichiometry= C4H4ClN C1[X(C4H4ClN)] #Atoms= 10  
 Charge = 0 Multiplicity = 1  
 -----

SCF Energy= -669.759876468 Predicted Change= -1.281848D-07  
 =====

Optimization completed. {Found 2 times}  
 Item Max Val. Criteria Pass? RMS Val. Criteria Pass?  
 Force 0.00012 || 0.00045 [ YES ] 0.00004 || 0.00030 [ YES ]  
 Displ 0.00074 || 0.00180 [ YES ] 0.00074 || 0.00180 [ YES ]  
 -----

Atomic Coordinates (Angstroms)  
 Type X Y Z  
 -----

|    |           |           |           |
|----|-----------|-----------|-----------|
| C  | 1.845757  | 0.713331  | 0.000062  |
| C  | 0.543611  | 1.165227  | 0.000129  |
| C  | -0.282219 | 0.008336  | -0.000015 |
| C  | 0.521097  | -1.110679 | -0.000006 |
| N  | 1.820323  | -0.660374 | -0.000005 |
| H  | 2.633879  | -1.255822 | -0.000155 |
| H  | 2.779755  | 1.256031  | 0.000106  |
| H  | 0.213751  | 2.193915  | 0.000221  |
| H  | 0.272819  | -2.160741 | -0.000053 |
| Cl | -2.024232 | -0.004003 | -0.000065 |

-----

## Statistical Thermodynamic Analysis

Temperature= 298.150 Kelvin Pressure= 1.00000 Atm  
 =====

SCF Energy= -669.759876468 Predicted Change= -1.281848D-07  
 Zero-point correction (ZPE)= -669.6865 0.07335  
 Internal Energy (U)= -669.6814 0.07842  
 Enthalpy (H)= -669.6805 0.07936  
 Gibbs Free Energy (G)= -669.7154 0.04445  
 -----

Frequencies -- 238.8488 295.2668 441.3581

**Chloroquinazoline**

Supporting Information: 2chloroquinazoline.out

-----  
Using Gaussian 03: IA32L-G03RevC.02 12-Jun-2004

=====

# opt freq nosymm ub3lyp/6-31g(d) geom=connectivity

#N Geom=AllCheck Guess=Read SCRF=Check GenChk UB3LYP/6-31G(d) Freq

-----  
Pointgroup= C1 Stoichiometry= C8H5ClN2 C1[X(C8H5ClN2)] #Atoms= 16

Charge = 0 Multiplicity = 1

-----  
SCF Energy= -877.566740677 Predicted Change= -1.267219D-07

=====

Optimization completed. {Found 2 times}

Item Max Val. Criteria Pass? RMS Val. Criteria Pass?

Force 0.00010 || 0.00045 [ YES ] 0.00002 || 0.00030 [ YES ]

Displ 0.00050 || 0.00180 [ YES ] 0.00050 || 0.00180 [ YES ]

-----  
Atomic Coordinates (Angstroms)  
Type X Y Z-----  
C -4.502035 -0.921271 0.000305  
C -3.123819 -0.918716 0.000102  
C -2.426489 0.314842 0.000211  
C -3.167219 1.533322 0.000521  
C -4.583483 1.502377 0.000726  
C -5.238589 0.291098 0.000619  
H -5.038612 -1.866082 0.000224  
H -2.545037 -1.836464 -0.000139  
C -2.391609 2.719975 0.000614  
H -5.137035 2.438168 0.000969  
H -6.324101 0.256952 0.000774  
C -0.494344 1.498625 0.000080  
H -2.881711 3.694194 0.000872  
N -1.060081 0.323248 0.000003  
Cl 1.261038 1.527651 0.000054  
N -1.073990 2.722834 0.000427-----  
Statistical Thermodynamic Analysis

Temperature= 298.150 Kelvin Pressure= 1.00000 Atm

=====

SCF Energy= -877.566740677 Predicted Change= -1.267219D-07

Zero-point correction (ZPE)= -877.4524 0.11433

Internal Energy (U)= -877.4446 0.12208

Enthalpy (H)= -877.4437 0.12303

Gibbs Free Energy (G)= -877.4856 0.08104

-----  
Frequencies -- 92.5021 174.0292 230.0969

Supporting Information: **2radicalquinazoline.out**

-----  
 Using Gaussian 03: IA32L-G03RevC.02 12-Jun-2004  
 =====

# opt freq nosymm ub3lyp/6-31g(d) geom=connectivity  
 #N Geom=AllCheck Guess=Read SCRF=Check GenChk UB3LYP/6-31G(d) Freq  
 -----

Pointgroup= C1 Stoichiometry= C8H5N2(2) C1[X(C8H5N2)] #Atoms= 15  
 Charge = 0 Multiplicity = 2  
 -----

SCF Energy= -417.288737051 Predicted Change= -2.401990D-07  
 =====

Optimization completed. {Found 2 times}  
 Item Max Val. Criteria Pass? RMS Val. Criteria Pass?  
 Force 0.00016 || 0.00045 [ YES ] 0.00004 || 0.00030 [ YES ]  
 Displ 0.00047 || 0.00180 [ YES ] 0.00047 || 0.00180 [ YES ]  
 -----

Atomic Coordinates (Angstroms)  
 Type X Y Z  
 -----

|   |           |           |           |
|---|-----------|-----------|-----------|
| C | -4.504015 | -0.923054 | 0.000305  |
| C | -3.125339 | -0.925558 | 0.000096  |
| C | -2.425139 | 0.303848  | 0.000201  |
| C | -3.157552 | 1.530474  | 0.000522  |
| C | -4.575290 | 1.500554  | 0.000730  |
| C | -5.235198 | 0.292089  | 0.000622  |
| H | -5.044282 | -1.865885 | 0.000224  |
| H | -2.550408 | -1.845950 | -0.000148 |
| C | -2.392206 | 2.726897  | 0.000614  |
| H | -5.126679 | 2.437760  | 0.000973  |
| H | -6.320874 | 0.262936  | 0.000780  |
| C | -0.522376 | 1.504980  | 0.000120  |
| H | -2.891990 | 3.696471  | 0.000857  |
| N | -1.049027 | 0.331942  | -0.000001 |
| N | -1.067778 | 2.725598  | 0.000414  |

## Statistical Thermodynamic Analysis

Temperature= 298.150 Kelvin Pressure= 1.00000 Atm  
 =====

SCF Energy= -417.288737051 Predicted Change= -2.401990D-07  
 Zero-point correction (ZPE)= -417.1775 0.11115  
 Internal Energy (U)= -417.1710 0.11771  
 Enthalpy (H)= -417.1700 0.11865  
 Gibbs Free Energy (G)= -417.2093 0.07943  
 -----

Frequencies -- 169.9891 193.6583 381.9987

Supporting Information: **4chloroquinazoline.out**

-----  
 Using Gaussian 03: IA32L-G03RevC.02 12-Jun-2004  
 =====

# opt freq nosymm ub3lyp/6-31g(d) geom=connectivity  
 #N Geom=AllCheck Guess=Read SCRF=Check GenChk UB3LYP/6-31G(d) Freq  
 -----

Pointgroup= C1 Stoichiometry= C8H5ClN2 C1[X(C8H5ClN2)] #Atoms= 16  
 Charge = 0 Multiplicity = 1  
 -----

SCF Energy= -877.568211736 Predicted Change= -3.444833D-07  
 =====

Optimization completed. {Found 2 times}  
 Item Max Val. Criteria Pass? RMS Val. Criteria Pass?  
 Force 0.00016 || 0.00045 [ YES ] 0.00004 || 0.00030 [ YES ]  
 Displ 0.00059 || 0.00180 [ YES ] 0.00059 || 0.00180 [ YES ]  
 -----

Atomic Coordinates (Angstroms)  
 Type X Y Z  
 -----

|    |           |           |           |
|----|-----------|-----------|-----------|
| C  | -4.504863 | -0.930099 | 0.000290  |
| C  | -3.127949 | -0.910671 | 0.000107  |
| C  | -2.434139 | 0.325585  | 0.000231  |
| C  | -3.186835 | 1.542862  | 0.000538  |
| C  | -4.602082 | 1.495135  | 0.000724  |
| C  | -5.245704 | 0.277179  | 0.000602  |
| H  | -5.033159 | -1.879477 | 0.000194  |
| H  | -2.537645 | -1.821067 | -0.000131 |
| C  | -2.385620 | 2.721172  | 0.000618  |
| H  | -5.165168 | 2.421808  | 0.000960  |
| H  | -6.331126 | 0.239657  | 0.000739  |
| C  | -0.482573 | 1.494432  | 0.000260  |
| N  | -1.068002 | 0.321615  | 0.000051  |
| N  | -1.084568 | 2.718399  | 0.000475  |
| Cl | -3.170655 | 4.299429  | 0.001016  |
| H  | 0.604783  | 1.514436  | -0.000039 |

## Statistical Thermodynamic Analysis

Temperature= 298.150 Kelvin Pressure= 1.00000 Atm  
 =====

SCF Energy= -877.568211736 Predicted Change= -3.444833D-07  
 Zero-point correction (ZPE)= -877.4535 0.11467  
 Internal Energy (U)= -877.4457 0.12241  
 Enthalpy (H)= -877.4448 0.12335  
 Gibbs Free Energy (G)= -877.4867 0.08143  
 -----

Frequencies -- 104.3000 177.0151 220.6087

Supporting Information: **4radicalquinazoline.out**

-----  
 Using Gaussian 03: IA32L-G03RevC.02 12-Jun-2004  
 =====

# opt freq nosymm ub3lyp/6-31g(d) geom=connectivity  
 #N Geom=AllCheck Guess=Read SCRF=Check GenChk UB3LYP/6-31G(d) Freq  
 -----

Pointgroup= C1 Stoichiometry= C8H5N2(2) C1[X(C8H5N2)] #Atoms= 15  
 Charge = 0 Multiplicity = 2  
 -----

SCF Energy= -417.294775692 Predicted Change= -2.392063D-07  
 =====

Optimization completed. {Found 2 times}  
 Item Max Val. Criteria Pass? RMS Val. Criteria Pass?  
 Force 0.00014 || 0.00045 [ YES ] 0.00003 || 0.00030 [ YES ]  
 Displ 0.00065 || 0.00180 [ YES ] 0.00065 || 0.00180 [ YES ]  
 -----

Atomic Coordinates (Angstroms)  
 Type X Y Z  
 -----

|   |           |           |           |
|---|-----------|-----------|-----------|
| C | -4.505736 | -0.925292 | 0.000283  |
| C | -3.125964 | -0.912387 | 0.000091  |
| C | -2.429853 | 0.320775  | 0.000218  |
| C | -3.191150 | 1.538995  | 0.000554  |
| C | -4.603593 | 1.497523  | 0.000743  |
| C | -5.249688 | 0.279090  | 0.000608  |
| H | -5.033995 | -1.874884 | 0.000173  |
| H | -2.544308 | -1.828693 | -0.000154 |
| C | -2.385531 | 2.703374  | 0.000558  |
| H | -5.157610 | 2.431452  | 0.000963  |
| H | -6.335010 | 0.237601  | 0.000734  |
| C | -0.466790 | 1.494953  | 0.000517  |
| N | -1.061246 | 0.331719  | 0.000130  |
| N | -1.113690 | 2.712054  | 0.000432  |
| H | 0.619513  | 1.524685  | -0.000231 |

## Statistical Thermodynamic Analysis

Temperature= 298.150 Kelvin Pressure= 1.00000 Atm  
 =====

SCF Energy= -417.294775692 Predicted Change= -2.392063D-07  
 Zero-point correction (ZPE)= -417.1832 0.11149  
 Internal Energy (U)= -417.1767 0.11801  
 Enthalpy (H)= -417.1758 0.11896  
 Gibbs Free Energy (G)= -417.2149 0.07977  
 -----

Frequencies -- 174.6322 182.8475 386.3170

Supporting Information: **5chloroquinazoline.out**

-----  
 Using Gaussian 03: AM64L-G03RevC.02 12-Jun-2004  
 =====

# opt freq nosymm ub3lyp/6-31g(d) geom=connectivity  
 #N Geom=AllCheck Guess=Read SCRF=Check GenChk UB3LYP/6-31G(d) Freq  
 -----

Pointgroup= C1 Stoichiometry= C8H5ClN2 C1[X(C8H5ClN2)] #Atoms= 16  
 Charge = 0 Multiplicity = 1  
 -----

SCF Energy= -877.563492039 Predicted Change= -2.330198D-07  
 =====

Optimization completed. {Found 2 times}  
 Item Max Val. Criteria Pass? RMS Val. Criteria Pass?  
 Force 0.00021 || 0.00045 [ YES ] 0.00003 || 0.00030 [ YES ]  
 Displ 0.00088 || 0.00180 [ YES ] 0.00088 || 0.00180 [ YES ]  
 -----

Atomic Coordinates (Angstroms)  
 Type X Y Z  
 -----

|    |           |           |           |
|----|-----------|-----------|-----------|
| C  | -4.504475 | -0.919156 | 0.000290  |
| C  | -3.128527 | -0.912631 | 0.000113  |
| C  | -2.432952 | 0.322671  | 0.000233  |
| C  | -3.164003 | 1.551214  | 0.000536  |
| C  | -4.583693 | 1.495084  | 0.000712  |
| C  | -5.244864 | 0.288411  | 0.000592  |
| H  | -5.045466 | -1.861178 | 0.000198  |
| H  | -2.545576 | -1.827287 | -0.000118 |
| C  | -2.380780 | 2.735391  | 0.000628  |
| C  | -0.475744 | 1.494055  | 0.000224  |
| H  | -2.867194 | 3.708619  | 0.000856  |
| N  | -1.068311 | 0.321270  | 0.000065  |
| N  | -1.063678 | 2.722594  | 0.000465  |
| H  | 0.612383  | 1.496685  | -0.000007 |
| H  | -6.329215 | 0.265490  | 0.000726  |
| Cl | -5.519272 | 2.983551  | 0.001081  |

## Statistical Thermodynamic Analysis

Temperature= 298.150 Kelvin Pressure= 1.00000 Atm  
 =====

SCF Energy= -877.563492039 Predicted Change= -2.330198D-07  
 Zero-point correction (ZPE)= -877.4487 0.11472  
 Internal Energy (U)= -877.4409 0.12250  
 Enthalpy (H)= -877.4400 0.12344  
 Gibbs Free Energy (G)= -877.4820 0.08146  
 -----

Frequencies -- 114.2596 180.1157 216.2850

Supporting Information: **5radicalquinazoline.out**

-----  
 Using Gaussian 03: AM64L-G03RevC.02 12-Jun-2004  
 =====

# opt freq nosymm ub3lyp/6-31g(d) geom=connectivity  
 #N Geom=AllCheck Guess=Read SCRF=Check GenChk UB3LYP/6-31G(d) Freq  
 -----

Pointgroup= C1 Stoichiometry= C8H5N2(2) C1[X(C8H5N2)] #Atoms= 15  
 Charge = 0 Multiplicity = 2  
 -----

SCF Energy= -417.282412304 Predicted Change= -3.298168D-07  
 =====

Optimization completed. {Found 2 times}  
 Item Max Val. Criteria Pass? RMS Val. Criteria Pass?  
 Force 0.00026 || 0.00045 [ YES ] 0.00004 || 0.00030 [ YES ]  
 Displ 0.00065 || 0.00180 [ YES ] 0.00065 || 0.00180 [ YES ]  
 -----

Atomic Coordinates (Angstroms)  
 Type X Y Z  
 -----

|   |           |           |           |
|---|-----------|-----------|-----------|
| C | -4.512385 | -0.919438 | 0.000299  |
| C | -3.134031 | -0.911827 | 0.000120  |
| C | -2.422649 | 0.316345  | 0.000228  |
| C | -3.157179 | 1.551710  | 0.000524  |
| C | -4.550835 | 1.457021  | 0.000691  |
| C | -5.259698 | 0.296807  | 0.000592  |
| H | -5.049683 | -1.864745 | 0.000217  |
| H | -2.558858 | -1.831702 | -0.000108 |
| C | -2.379198 | 2.739645  | 0.000650  |
| C | -0.471923 | 1.501184  | 0.000049  |
| H | -2.874019 | 3.710172  | 0.000888  |
| N | -1.059426 | 0.324798  | 0.000025  |
| N | -1.062497 | 2.729978  | 0.000453  |
| H | 0.616185  | 1.507276  | 0.000151  |
| H | -6.345898 | 0.274008  | 0.000734  |

## Statistical Thermodynamic Analysis

Temperature= 298.150 Kelvin Pressure= 1.00000 Atm  
 =====

SCF Energy= -417.282412304 Predicted Change= -3.298168D-07  
 Zero-point correction (ZPE)= -417.1710 0.11132  
 Internal Energy (U)= -417.1645 0.11786  
 Enthalpy (H)= -417.1636 0.11880  
 Gibbs Free Energy (G)= -417.2028 0.07957  
 -----

Frequencies -- 170.3441 180.4006 379.6500

Supporting Information: **6chloroquinazoline.out**

-----  
 Using Gaussian 03: IA32L-G03RevC.02 12-Jun-2004  
 =====

# opt freq nosymm ub3lyp/6-31g(d) geom=connectivity  
 #N Geom=AllCheck Guess=Read SCRF=Check GenChk UB3LYP/6-31G(d) Freq  
 -----

Pointgroup= C1 Stoichiometry= C8H5ClN2 C1[X(C8H5ClN2)] #Atoms= 16  
 Charge = 0 Multiplicity = 1  
 -----

SCF Energy= -877.564536816 Predicted Change= -1.049108D-06  
 =====

Optimization completed. {Found 2 times}  
 Item Max Val. Criteria Pass? RMS Val. Criteria Pass?  
 Force 0.00033 || 0.00045 [ YES ] 0.00008 || 0.00030 [ YES ]  
 Displ 0.00162 || 0.00180 [ YES ] 0.00162 || 0.00180 [ YES ]  
 -----

Atomic Coordinates (Angstroms)  
 Type X Y Z  
 -----

|    |           |           |           |
|----|-----------|-----------|-----------|
| C  | -4.505758 | -0.927371 | 0.000294  |
| C  | -3.129845 | -0.916531 | 0.000115  |
| C  | -2.426225 | 0.315540  | 0.000224  |
| C  | -3.167151 | 1.532410  | 0.000530  |
| C  | -4.583806 | 1.509820  | 0.000708  |
| C  | -5.226621 | 0.294318  | 0.000587  |
| H  | -5.054099 | -1.863441 | 0.000211  |
| H  | -2.556158 | -1.837495 | -0.000114 |
| C  | -2.394881 | 2.723833  | 0.000643  |
| H  | -5.145120 | 2.439103  | 0.000941  |
| C  | -0.480405 | 1.498532  | 0.000155  |
| H  | -2.893656 | 3.694302  | 0.000870  |
| N  | -1.061774 | 0.319286  | 0.000053  |
| N  | -1.078800 | 2.724080  | 0.000464  |
| Cl | -6.980394 | 0.230145  | 0.000807  |
| H  | 0.607919  | 1.511797  | 0.000051  |

## Statistical Thermodynamic Analysis

Temperature= 298.150 Kelvin Pressure= 1.00000 Atm  
 =====

SCF Energy= -877.564536816 Predicted Change= -1.049108D-06  
 Zero-point correction (ZPE)= -877.4499 0.11458  
 Internal Energy (U)= -877.4421 0.12237  
 Enthalpy (H)= -877.4412 0.12331  
 Gibbs Free Energy (G)= -877.4832 0.08127  
 -----

Frequencies -- 103.4398 174.6919 222.2890



Supporting Information: **6radicalquinazoline.out**

-----  
 Using Gaussian 03: IA32L-G03RevC.02 12-Jun-2004  
 =====

# opt freq nosymm ub3lyp/6-31g(d) geom=connectivity  
 #N Geom=AllCheck Guess=Read SCRF=Check GenChk UB3LYP/6-31G(d) Freq  
 -----

Pointgroup= C1 Stoichiometry= C8H5N2(2) C1[X(C8H5N2)] #Atoms= 15  
 Charge = 0 Multiplicity = 2  
 -----

SCF Energy= -417.281802421 Predicted Change= -8.544767D-08  
 =====

Optimization completed. {Found 2 times}  
 Item Max Val. Criteria Pass? RMS Val. Criteria Pass?  
 Force 0.00010 || 0.00045 [ YES ] 0.00002 || 0.00030 [ YES ]  
 Displ 0.00049 || 0.00180 [ YES ] 0.00049 || 0.00180 [ YES ]  
 -----

Atomic Coordinates (Angstroms)  
 Type X Y Z  
 -----

|   |           |           |           |
|---|-----------|-----------|-----------|
| C | -4.513731 | -0.938752 | 0.000288  |
| C | -3.130353 | -0.921753 | 0.000111  |
| C | -2.435572 | 0.317911  | 0.000233  |
| C | -3.170428 | 1.542836  | 0.000536  |
| C | -4.596520 | 1.519714  | 0.000720  |
| C | -5.179347 | 0.292183  | 0.000585  |
| H | -5.060191 | -1.877957 | 0.000197  |
| H | -2.546137 | -1.837162 | -0.000120 |
| C | -2.392184 | 2.729138  | 0.000626  |
| H | -5.161575 | 2.449006  | 0.000947  |
| C | -0.483068 | 1.495581  | 0.000234  |
| H | -2.886575 | 3.701864  | 0.000855  |
| N | -1.070227 | 0.319242  | 0.000067  |
| N | -1.075485 | 2.723184  | 0.000466  |
| H | 0.605014  | 1.503149  | -0.000013 |

## Statistical Thermodynamic Analysis

Temperature= 298.150 Kelvin Pressure= 1.00000 Atm  
 =====

SCF Energy= -417.281802421 Predicted Change= -8.544767D-08  
 Zero-point correction (ZPE)= -417.1706 0.11118  
 Internal Energy (U)= -417.1640 0.11772  
 Enthalpy (H)= -417.1631 0.11866  
 Gibbs Free Energy (G)= -417.2023 0.07945  
 -----

Frequencies -- 171.7018 191.3399 379.7870

Supporting Information: **7chloroquinazoline.out**

-----  
 Using Gaussian 03: AM64L-G03RevC.02 12-Jun-2004  
 =====

# opt freq nosymm ub3lyp/6-31g(d) geom=connectivity  
 #N Geom=AllCheck Guess=Read SCRF=Check GenChk UB3LYP/6-31G(d) Freq  
 -----

Pointgroup= C1 Stoichiometry= C8H5ClN2 C1[X(C8H5ClN2)] #Atoms= 16  
 Charge = 0 Multiplicity = 1  
 -----

SCF Energy= -877.564855860 Predicted Change= -8.091301D-08  
 =====

Optimization completed. {Found 2 times}  
 Item Max Val. Criteria Pass? RMS Val. Criteria Pass?  
 Force 0.00009 || 0.00045 [ YES ] 0.00002 || 0.00030 [ YES ]  
 Displ 0.00029 || 0.00180 [ YES ] 0.00029 || 0.00180 [ YES ]  
 -----

Atomic Coordinates (Angstroms)  
 Type X Y Z  
 -----

|    |           |           |           |
|----|-----------|-----------|-----------|
| C  | -4.498563 | -0.909274 | 0.000292  |
| C  | -3.122653 | -0.919766 | 0.000110  |
| C  | -2.427618 | 0.316182  | 0.000232  |
| C  | -3.165312 | 1.535996  | 0.000533  |
| C  | -4.581923 | 1.501580  | 0.000713  |
| C  | -5.245271 | 0.296774  | 0.000594  |
| H  | -2.553342 | -1.841835 | -0.000121 |
| C  | -2.392070 | 2.724045  | 0.000623  |
| H  | -5.140153 | 2.434520  | 0.000940  |
| C  | -0.480382 | 1.497116  | 0.000243  |
| H  | -2.889448 | 3.695324  | 0.000851  |
| N  | -1.062560 | 0.317761  | 0.000068  |
| N  | -1.074893 | 2.724028  | 0.000467  |
| H  | 0.607692  | 1.507323  | -0.000018 |
| H  | -6.328695 | 0.251785  | 0.000725  |
| Cl | -5.378773 | -2.426550 | 0.000145  |

## Statistical Thermodynamic Analysis

Temperature= 298.150 Kelvin Pressure= 1.00000 Atm  
 =====

SCF Energy= -877.564855860 Predicted Change= -8.091301D-08  
 Zero-point correction (ZPE)= -877.4502 0.11457  
 Internal Energy (U)= -877.4424 0.12235  
 Enthalpy (H)= -877.4415 0.12330  
 Gibbs Free Energy (G)= -877.4835 0.08126  
 -----

Frequencies -- 100.4704 182.7572 223.1319

Supporting Information: **7radicalquinazoline.out**

-----  
 Using Gaussian 03: AM64L-G03RevC.02 12-Jun-2004  
 =====

# opt freq nosymm ub3lyp/6-31g(d) geom=connectivity  
 #N Geom=AllCheck Guess=Read SCRF=Check GenChk UB3LYP/6-31G(d) Freq  
 -----

Pointgroup= C1 Stoichiometry= C8H5N2(2) C1[X(C8H5N2)] #Atoms= 15  
 Charge = 0 Multiplicity = 2  
 -----

SCF Energy= -417.282625678 Predicted Change= -1.804080D-07  
 =====

Optimization completed. {Found 2 times}  
 Item Max Val. Criteria Pass? RMS Val. Criteria Pass?  
 Force 0.00016 || 0.00045 [ YES ] 0.00003 || 0.00030 [ YES ]  
 Displ 0.00040 || 0.00180 [ YES ] 0.00040 || 0.00180 [ YES ]  
 -----

Atomic Coordinates (Angstroms)  
 Type X Y Z  
 -----

|   |           |           |           |
|---|-----------|-----------|-----------|
| C | -4.476962 | -0.864840 | 0.000311  |
| C | -3.120045 | -0.935342 | 0.000122  |
| C | -2.418216 | 0.308393  | 0.000228  |
| C | -3.166926 | 1.526059  | 0.000522  |
| C | -4.585884 | 1.503559  | 0.000703  |
| C | -5.259052 | 0.295423  | 0.000597  |
| H | -2.552756 | -1.861072 | -0.000105 |
| C | -2.396374 | 2.716335  | 0.000650  |
| H | -5.134443 | 2.443364  | 0.000937  |
| C | -0.478178 | 1.501056  | -0.000007 |
| H | -2.897864 | 3.685605  | 0.000890  |
| N | -1.055187 | 0.318483  | 0.000015  |
| N | -1.078884 | 2.723839  | 0.000446  |
| H | 0.610008  | 1.516154  | 0.000201  |
| H | -6.344427 | 0.254543  | 0.000740  |

## Statistical Thermodynamic Analysis

Temperature= 298.150 Kelvin Pressure= 1.00000 Atm  
 =====

SCF Energy= -417.282625678 Predicted Change= -1.804080D-07  
 Zero-point correction (ZPE)= -417.1714 0.11112  
 Internal Energy (U)= -417.1649 0.11766  
 Enthalpy (H)= -417.1640 0.11861  
 Gibbs Free Energy (G)= -417.2032 0.07941  
 -----

Frequencies -- 179.8423 182.9018 382.0976

Supporting Information: **8chloroquinazoline.out**

-----  
 Using Gaussian 03: AM64L-G03RevC.02 12-Jun-2004  
 =====

# opt freq nosymm ub3lyp/6-31g(d) geom=connectivity  
 #N Geom=AllCheck Guess=Read SCRF=Check GenChk UB3LYP/6-31G(d) Freq  
 -----

Pointgroup= C1 Stoichiometry= C8H5ClN2 C1[X(C8H5ClN2)] #Atoms= 16  
 Charge = 0 Multiplicity = 1  
 -----

SCF Energy= -877.561682217 Predicted Change= -8.172979D-08  
 =====

Optimization completed. {Found 2 times}  
 Item Max Val. Criteria Pass? RMS Val. Criteria Pass?  
 Force 0.00009 || 0.00045 [ YES ] 0.00002 || 0.00030 [ YES ]  
 Displ 0.00040 || 0.00180 [ YES ] 0.00040 || 0.00180 [ YES ]  
 -----

Atomic Coordinates (Angstroms)  
 Type X Y Z  
 -----

|    |           |           |           |
|----|-----------|-----------|-----------|
| C  | -0.001603 | 0.007043  | -0.000002 |
| C  | 1.376918  | -0.000605 | 0.000002  |
| C  | 2.107730  | 1.223955  | 0.000005  |
| C  | 1.363682  | 2.442402  | 0.000004  |
| C  | -0.052171 | 2.430870  | 0.000000  |
| C  | -0.719164 | 1.227520  | -0.000003 |
| H  | -0.538088 | -0.935955 | -0.000005 |
| C  | 2.141105  | 3.630400  | 0.000002  |
| H  | -0.593577 | 3.373366  | -0.000003 |
| C  | 4.052095  | 2.408856  | 0.000038  |
| H  | 1.639679  | 4.599535  | -0.000002 |
| N  | 3.467651  | 1.231505  | 0.000014  |
| N  | 3.456957  | 3.635168  | 0.000010  |
| H  | 5.140037  | 2.417214  | -0.000012 |
| H  | -1.804760 | 1.198608  | -0.000007 |
| Cl | 2.236147  | -1.519786 | 0.000004  |

## Statistical Thermodynamic Analysis

Temperature= 298.150 Kelvin Pressure= 1.00000 Atm  
 =====

SCF Energy= -877.561682217 Predicted Change= -8.172979D-08  
 Zero-point correction (ZPE)= -877.4470 0.11465  
 Internal Energy (U)= -877.4392 0.12242  
 Enthalpy (H)= -877.4383 0.12336  
 Gibbs Free Energy (G)= -877.4802 0.08139  
 -----

Frequencies -- 116.6379 175.9767 204.5584

Supporting Information: **8radicalquinazoline.out**

-----  
 Using Gaussian 03: AM64L-G03RevC.02 12-Jun-2004  
 =====

# opt freq nosymm ub3lyp/6-31g(d) geom=connectivity  
 #N Geom=AllCheck Guess=Read SCRF=Check GenChk UB3LYP/6-31G(d) Freq

-----  
 Pointgroup= C1 Stoichiometry= C8H5N2(2) C1[X(C8H5N2)] #Atoms= 15  
 Charge = 0 Multiplicity = 2  
 -----

SCF Energy= -417.278623635 Predicted Change= -2.704237D-07  
 =====

Optimization completed. {Found 2 times}  
 Item Max Val. Criteria Pass? RMS Val. Criteria Pass?  
 Force 0.00023 || 0.00045 [ YES ] 0.00004 || 0.00030 [ YES ]  
 Displ 0.00072 || 0.00180 [ YES ] 0.00072 || 0.00180 [ YES ]  
 -----

Atomic Coordinates (Angstroms)  
 Type X Y Z  
 -----

|   |           |           |           |
|---|-----------|-----------|-----------|
| C | -0.006221 | -0.008928 | 0.000002  |
| C | 1.352312  | 0.045357  | 0.000006  |
| C | 2.117207  | 1.223120  | 0.000007  |
| C | 1.366515  | 2.445939  | 0.000000  |
| C | -0.052001 | 2.421841  | -0.000005 |
| C | -0.728145 | 1.222068  | -0.000004 |
| H | -0.542685 | -0.954540 | 0.000006  |
| C | 2.144741  | 3.633069  | 0.000012  |
| H | -0.595083 | 3.363639  | -0.000005 |
| C | 4.058881  | 2.408479  | -0.000059 |
| H | 1.646214  | 4.604218  | 0.000014  |
| N | 3.481577  | 1.227464  | -0.000007 |
| N | 3.460897  | 3.634498  | 0.000003  |
| H | 5.146964  | 2.422277  | 0.000075  |
| H | -1.814684 | 1.201381  | -0.000004 |

## Statistical Thermodynamic Analysis

Temperature= 298.150 Kelvin Pressure= 1.00000 Atm  
 =====

SCF Energy= -417.278623635 Predicted Change= -2.704237D-07  
 Zero-point correction (ZPE)= -417.1674 0.11120  
 Internal Energy (U)= -417.1608 0.11775  
 Enthalpy (H)= -417.1599 0.11869  
 Gibbs Free Energy (G)= -417.1991 0.07944  
 -----

Frequencies -- 171.6890 179.1024 374.2655

**Chloroquinolines**Supporting Information: **2chloroquinoline.out**-----  
Using Gaussian 03: IA32L-G03RevC.02 12-Jun-2004  
=====# opt freq nosymm ub3lyp/6-31g(d) geom=connectivity  
#N Geom=AllCheck Guess=Read SCRF=Check GenChk UB3LYP/6-31G(d) Freq  
-----Pointgroup= C1 Stoichiometry= C9H6ClN C1[X(C9H6ClN)] #Atoms= 17  
Charge = 0 Multiplicity = 1  
-----SCF Energy= -861.529938911 Predicted Change= -2.627986D-07  
=====Optimization completed. {Found 2 times}  
Item Max Val. Criteria Pass? RMS Val. Criteria Pass?  
Force 0.00016 || 0.00045 [ YES ] 0.00003 || 0.00030 [ YES ]  
Displ 0.00087 || 0.00180 [ YES ] 0.00087 || 0.00180 [ YES ]  
-----Atomic Coordinates (Angstroms)  
Type X Y Z  
-----

|    |           |           |           |
|----|-----------|-----------|-----------|
| C  | -4.495995 | -0.922878 | 0.000309  |
| C  | -3.118343 | -0.898455 | 0.000117  |
| C  | -2.427855 | 0.339763  | 0.000224  |
| C  | -3.177206 | 1.558195  | 0.000525  |
| C  | -4.593948 | 1.499180  | 0.000716  |
| C  | -5.240013 | 0.282362  | 0.000611  |
| H  | -5.020840 | -1.874210 | 0.000227  |
| H  | -2.527067 | -1.808480 | -0.000115 |
| C  | -2.442509 | 2.773471  | 0.000615  |
| H  | -5.160411 | 2.427401  | 0.000948  |
| H  | -6.325626 | 0.242702  | 0.000759  |
| C  | -1.070135 | 2.745596  | 0.000418  |
| C  | -0.444660 | 1.470776  | 0.000136  |
| H  | -2.974468 | 3.721886  | 0.000837  |
| H  | -0.472169 | 3.649205  | 0.000473  |
| N  | -1.059605 | 0.326742  | 0.000027  |
| Cl | 1.323122  | 1.437621  | -0.000165 |

-----  
Statistical Thermodynamic AnalysisTemperature= 298.150 Kelvin Pressure= 1.00000 Atm  
=====SCF Energy= -861.529938911 Predicted Change= -2.627986D-07  
Zero-point correction (ZPE)= -861.4037 0.12621  
Internal Energy (U)= -861.3958 0.13410  
Enthalpy (H)= -861.3948 0.13504  
Gibbs Free Energy (G)= -861.4370 0.09290  
-----

Frequencies -- 101.2401 176.8232 223.1959

Supporting Information: **2radicalquinoline.out**

-----  
 Using Gaussian 03: IA32L-G03RevC.02 12-Jun-2004  
 =====

# opt freq nosymm ub3lyp/6-31g(d) geom=connectivity  
 #N Geom=AllCheck Guess=Read SCRF=Check GenChk UB3LYP/6-31G(d) Freq  
 -----

Pointgroup= C1 Stoichiometry= C9H6N(2) C1[X(C9H6N)] #Atoms= 16  
 Charge = 0 Multiplicity = 2  
 -----

SCF Energy= -401.253707761 Predicted Change= -1.155898D-06  
 =====

Optimization completed. {Found 2 times}  
 Item Max Val. Criteria Pass? RMS Val. Criteria Pass?  
 Force 0.00039 || 0.00045 [ YES ] 0.00008 || 0.00030 [ YES ]  
 Displ 0.00092 || 0.00180 [ YES ] 0.00092 || 0.00180 [ YES ]  
 -----

Atomic Coordinates (Angstroms)  
 Type X Y Z  
 -----

|   |           |           |           |
|---|-----------|-----------|-----------|
| C | -4.502122 | -0.927163 | 0.000311  |
| C | -3.122878 | -0.910138 | 0.000118  |
| C | -2.433111 | 0.323648  | 0.000219  |
| C | -3.168564 | 1.551242  | 0.000520  |
| C | -4.585855 | 1.495634  | 0.000712  |
| C | -5.238524 | 0.281422  | 0.000609  |
| H | -5.032215 | -1.875709 | 0.000233  |
| H | -2.537504 | -1.824230 | -0.000112 |
| C | -2.435196 | 2.772744  | 0.000614  |
| H | -5.149359 | 2.425789  | 0.000942  |
| H | -6.324362 | 0.247843  | 0.000757  |
| C | -1.057982 | 2.758345  | 0.000418  |
| C | -0.459415 | 1.476002  | 0.000127  |
| H | -2.979882 | 3.715416  | 0.000845  |
| H | -0.468299 | 3.668541  | 0.000483  |
| N | -1.055581 | 0.353866  | 0.000030  |

## Statistical Thermodynamic Analysis

Temperature= 298.150 Kelvin Pressure= 1.00000 Atm  
 =====

SCF Energy= -401.253707761 Predicted Change= -1.155898D-06  
 Zero-point correction (ZPE)= -401.1306 0.12309  
 Internal Energy (U)= -401.1239 0.12975  
 Enthalpy (H)= -401.1230 0.13069  
 Gibbs Free Energy (G)= -401.1623 0.09135  
 -----

Frequencies -- 173.1186 196.7370 382.5078

Supporting Information: **3chloroquinoline.out**

-----  
 Using Gaussian 03: IA32L-G03RevC.02 12-Jun-2004  
 =====

# opt freq nosymm ub3lyp/6-31g(d) geom=connectivity  
 #N Geom=AllCheck Guess=Read SCRF=Check GenChk UB3LYP/6-31G(d) Freq  
 -----

Pointgroup= C1 Stoichiometry= C9H6ClN C1[X(C9H6ClN)] #Atoms= 17  
 Charge = 0 Multiplicity = 1  
 -----

SCF Energy= -861.525606095 Predicted Change= -4.134085D-07  
 =====

Optimization completed. {Found 2 times}  
 Item Max Val. Criteria Pass? RMS Val. Criteria Pass?  
 Force 0.00019 || 0.00045 [ YES ] 0.00004 || 0.00030 [ YES ]  
 Displ 0.00086 || 0.00180 [ YES ] 0.00086 || 0.00180 [ YES ]  
 -----

Atomic Coordinates (Angstroms)  
 Type X Y Z  
 -----

|    |           |           |           |
|----|-----------|-----------|-----------|
| C  | -4.497075 | -0.923486 | 0.000329  |
| C  | -3.120279 | -0.897557 | 0.000134  |
| C  | -2.426844 | 0.340468  | 0.000208  |
| C  | -3.177260 | 1.559148  | 0.000500  |
| C  | -4.595840 | 1.500384  | 0.000703  |
| C  | -5.240033 | 0.283678  | 0.000615  |
| H  | -5.023049 | -1.874106 | 0.000261  |
| H  | -2.528606 | -1.807440 | -0.000087 |
| C  | -2.454817 | 2.779881  | 0.000591  |
| H  | -5.161938 | 2.428674  | 0.000932  |
| H  | -6.325718 | 0.244287  | 0.000767  |
| C  | -1.083601 | 2.727645  | 0.000390  |
| C  | -0.421132 | 1.471679  | 0.000088  |
| H  | -2.980809 | 3.729877  | 0.000812  |
| H  | 0.667043  | 1.442330  | -0.000068 |
| N  | -1.060668 | 0.323775  | 0.000015  |
| Cl | -0.120518 | 4.193608  | 0.000475  |

## Statistical Thermodynamic Analysis

Temperature= 298.150 Kelvin Pressure= 1.00000 Atm  
 =====

SCF Energy= -861.525606095 Predicted Change= -4.134085D-07  
 Zero-point correction (ZPE)= -861.3992 0.12630  
 Internal Energy (U)= -861.3914 0.13420  
 Enthalpy (H)= -861.3904 0.13514  
 Gibbs Free Energy (G)= -861.4326 0.09297  
 -----

Frequencies -- 98.5368 187.0181 214.8968



Supporting Information: **3radicalquinoline.out**

-----  
 Using Gaussian 03: IA32L-G03RevC.02 12-Jun-2004  
 =====

# opt freq nosymm ub3lyp/6-31g(d) geom=connectivity  
 #N Geom=AllCheck Guess=Read SCRF=Check GenChk UB3LYP/6-31G(d) Freq  
 -----

Pointgroup= C1 Stoichiometry= C9H6N(2) C1[X(C9H6N)] #Atoms= 16  
 Charge = 0 Multiplicity = 2  
 -----

SCF Energy= -401.242449260 Predicted Change= -5.754867D-07  
 =====

Optimization completed. {Found 2 times}  
 Item Max Val. Criteria Pass? RMS Val. Criteria Pass?  
 Force 0.00034 || 0.00045 [ YES ] 0.00006 || 0.00030 [ YES ]  
 Displ 0.00083 || 0.00180 [ YES ] 0.00083 || 0.00180 [ YES ]  
 -----

Atomic Coordinates (Angstroms)  
 Type X Y Z  
 -----

|   |           |           |           |
|---|-----------|-----------|-----------|
| C | -4.495197 | -0.922324 | 0.000326  |
| C | -3.118708 | -0.890691 | 0.000130  |
| C | -2.426688 | 0.349692  | 0.000219  |
| C | -3.187074 | 1.565815  | 0.000514  |
| C | -4.604160 | 1.501020  | 0.000709  |
| C | -5.243384 | 0.280979  | 0.000617  |
| H | -5.016560 | -1.875567 | 0.000256  |
| H | -2.524817 | -1.799184 | -0.000094 |
| C | -2.452476 | 2.790694  | 0.000588  |
| H | -5.174672 | 2.426671  | 0.000931  |
| H | -6.329095 | 0.237169  | 0.000768  |
| C | -1.099131 | 2.693194  | 0.000378  |
| C | -0.402872 | 1.474702  | 0.000107  |
| H | -2.978763 | 3.743209  | 0.000805  |
| H | 0.683871  | 1.427703  | -0.000084 |
| N | -1.060899 | 0.326156  | 0.000019  |

## Statistical Thermodynamic Analysis

Temperature= 298.150 Kelvin Pressure= 1.00000 Atm  
 =====

SCF Energy= -401.242449260 Predicted Change= -5.754867D-07  
 Zero-point correction (ZPE)= -401.1194 0.12299  
 Internal Energy (U)= -401.1128 0.12964  
 Enthalpy (H)= -401.1118 0.13058  
 Gibbs Free Energy (G)= -401.1511 0.09126  
 -----

Frequencies -- 182.4526 188.4143 381.9929

Supporting Information: **4chloroquinoline.out**

-----  
 Using Gaussian 03: IA32L-G03RevC.02 12-Jun-2004  
 =====

# opt freq nosymm ub3lyp/6-31g(d) geom=connectivity  
 #N Geom=AllCheck Guess=Read SCRF=Check GenChk UB3LYP/6-31G(d) Freq  
 -----

Pointgroup= C1 Stoichiometry= C9H6ClN C1[X(C9H6ClN)] #Atoms= 17  
 Charge = 0 Multiplicity = 1  
 -----

SCF Energy= -861.525672272 Predicted Change= -1.207015D-06  
 =====

Optimization completed. {Found 2 times}  
 Item Max Val. Criteria Pass? RMS Val. Criteria Pass?  
 Force 0.00037 || 0.00045 [ YES ] 0.00007 || 0.00030 [ YES ]  
 Displ 0.00172 || 0.00180 [ YES ] 0.00172 || 0.00180 [ YES ]  
 -----

Atomic Coordinates (Angstroms)  
 Type X Y Z  
 -----

|    |           |           |           |
|----|-----------|-----------|-----------|
| C  | -4.497790 | -0.929277 | 0.000304  |
| C  | -3.122491 | -0.891925 | 0.000118  |
| C  | -2.430460 | 0.348080  | 0.000213  |
| C  | -3.192339 | 1.565371  | 0.000527  |
| C  | -4.609315 | 1.494677  | 0.000721  |
| C  | -5.245198 | 0.273515  | 0.000607  |
| H  | -5.016968 | -1.883634 | 0.000220  |
| H  | -2.522077 | -1.795969 | -0.000116 |
| C  | -2.438489 | 2.771775  | 0.000625  |
| H  | -5.183490 | 2.414756  | 0.000960  |
| H  | -6.330725 | 0.231129  | 0.000753  |
| C  | -1.065509 | 2.735730  | 0.000418  |
| C  | -0.430628 | 1.469518  | 0.000108  |
| H  | -0.479191 | 3.647487  | 0.000492  |
| H  | 0.658114  | 1.426793  | -0.000038 |
| N  | -1.065749 | 0.316980  | 0.000023  |
| Cl | -3.253670 | 4.326234  | 0.000992  |

## Statistical Thermodynamic Analysis

Temperature= 298.150 Kelvin Pressure= 1.00000 Atm  
 =====

SCF Energy= -861.525672272 Predicted Change= -1.207015D-06  
 Zero-point correction (ZPE)= -861.3991 0.12648  
 Internal Energy (U)= -861.3913 0.13433  
 Enthalpy (H)= -861.3903 0.13527  
 Gibbs Free Energy (G)= -861.4324 0.09324  
 -----

Frequencies -- 116.9391 177.2168 217.1971

Supporting Information: **4radicalquinoline.out**

-----  
 Using Gaussian 03: IA32L-G03RevC.02 12-Jun-2004  
 =====

# opt freq nosymm ub3lyp/6-31g(d) geom=connectivity  
 #N Geom=AllCheck Guess=Read SCRF=Check GenChk UB3LYP/6-31G(d) Freq  
 -----

Pointgroup= C1 Stoichiometry= C9H6N(2) C1[X(C9H6N)] #Atoms= 16  
 Charge = 0 Multiplicity = 2  
 -----

SCF Energy= -401.244482433 Predicted Change= -4.204978D-07  
 =====

Optimization completed. {Found 2 times}  
 Item Max Val. Criteria Pass? RMS Val. Criteria Pass?  
 Force 0.00026 || 0.00045 [ YES ] 0.00005 || 0.00030 [ YES ]  
 Displ 0.00083 || 0.00180 [ YES ] 0.00083 || 0.00180 [ YES ]  
 -----

Atomic Coordinates (Angstroms)  
 Type X Y Z  
 -----

|   |           |           |           |
|---|-----------|-----------|-----------|
| C | -4.500892 | -0.927057 | 0.000304  |
| C | -3.124157 | -0.899252 | 0.000112  |
| C | -2.425416 | 0.336575  | 0.000218  |
| C | -3.194741 | 1.560028  | 0.000529  |
| C | -4.612940 | 1.495881  | 0.000721  |
| C | -5.250294 | 0.275598  | 0.000611  |
| H | -5.022663 | -1.880202 | 0.000220  |
| H | -2.532593 | -1.809469 | -0.000125 |
| C | -2.424058 | 2.727457  | 0.000610  |
| H | -5.178256 | 2.423034  | 0.000956  |
| H | -6.335743 | 0.230368  | 0.000759  |
| C | -1.068210 | 2.755561  | 0.000423  |
| C | -0.425819 | 1.477211  | 0.000125  |
| H | -0.478334 | 3.667421  | 0.000488  |
| H | 0.663832  | 1.434807  | -0.000041 |
| N | -1.062021 | 0.327046  | 0.000023  |

## Statistical Thermodynamic Analysis

Temperature= 298.150 Kelvin Pressure= 1.00000 Atm  
 =====

SCF Energy= -401.244482433 Predicted Change= -4.204978D-07  
 Zero-point correction (ZPE)= -401.1215 0.12293  
 Internal Energy (U)= -401.1149 0.12957  
 Enthalpy (H)= -401.1139 0.13051  
 Gibbs Free Energy (G)= -401.1532 0.09119  
 -----

Frequencies -- 174.1872 187.7945 381.4356

Supporting Information: **5chloroquinoline.out**

-----  
 Using Gaussian 03: IA32L-G03RevC.02 12-Jun-2004  
 =====

# opt freq nosymm ub3lyp/6-31g(d) geom=connectivity  
 #N Geom=AllCheck Guess=Read SCRF=Check GenChk UB3LYP/6-31G(d) Freq  
 -----

Pointgroup= C1 Stoichiometry= C9H6ClN C1[X(C9H6ClN)] #Atoms= 17  
 Charge = 0 Multiplicity = 1  
 -----

SCF Energy= -861.525498876 Predicted Change= -1.228251D-06  
 =====

Optimization completed. {Found 1 times}  
 Item Max Val. Criteria Pass? RMS Val. Criteria Pass?  
 Force 0.00038 || 0.00045 [ YES ] 0.00007 || 0.00030 [ YES ]  
 Displ 0.00197 || 0.00180 [ NO ] 0.00197 || 0.00180 [ YES ]  
 -----

Atomic Coordinates (Angstroms)  
 Type X Y Z  
 -----

|    |           |           |           |
|----|-----------|-----------|-----------|
| C  | -4.496059 | -0.920199 | 0.000306  |
| C  | -3.121165 | -0.892557 | 0.000131  |
| C  | -2.430303 | 0.347236  | 0.000221  |
| C  | -3.171211 | 1.576182  | 0.000517  |
| C  | -4.592215 | 1.492391  | 0.000704  |
| C  | -5.244302 | 0.281182  | 0.000595  |
| H  | -5.026390 | -1.868082 | 0.000225  |
| H  | -2.526404 | -1.799840 | -0.000089 |
| C  | -2.431193 | 2.786205  | 0.000604  |
| H  | -6.328568 | 0.251601  | 0.000730  |
| C  | -1.057953 | 2.733055  | 0.000407  |
| C  | -0.421880 | 1.466967  | 0.000114  |
| H  | -2.955988 | 3.735486  | 0.000823  |
| H  | -0.460529 | 3.639536  | 0.000471  |
| H  | 0.666478  | 1.410559  | -0.000027 |
| N  | -1.065047 | 0.317954  | 0.000038  |
| Cl | -5.553039 | 2.969704  | 0.001050  |

## Statistical Thermodynamic Analysis

Temperature= 298.150 Kelvin Pressure= 1.00000 Atm  
 =====

SCF Energy= -861.525498876 Predicted Change= -1.228251D-06  
 Zero-point correction (ZPE)= -861.3990 0.12648  
 Internal Energy (U)= -861.3911 0.13435  
 Enthalpy (H)= -861.3902 0.13529  
 Gibbs Free Energy (G)= -861.4322 0.09323  
 -----

Frequencies -- 116.4217 182.3040 221.7779

Supporting Information: **5radicalquinoline.out**

-----  
 Using Gaussian 03: IA32L-G03RevC.02 12-Jun-2004  
 =====

# opt freq nosymm ub3lyp/6-31g(d) geom=connectivity  
 #N Geom=AllCheck Guess=Read SCRF=Check GenChk UB3LYP/6-31G(d) Freq  
 -----

Pointgroup= C1 Stoichiometry= C9H6N(2) C1[X(C9H6N)] #Atoms= 16  
 Charge = 0 Multiplicity = 2  
 -----

SCF Energy= -401.243661015 Predicted Change= -3.216854D-07  
 =====

Optimization completed. {Found 2 times}  
 Item Max Val. Criteria Pass? RMS Val. Criteria Pass?  
 Force 0.00027 || 0.00045 [ YES ] 0.00004 || 0.00030 [ YES ]  
 Displ 0.00060 || 0.00180 [ YES ] 0.00060 || 0.00180 [ YES ]  
 -----

Atomic Coordinates (Angstroms)  
 Type X Y Z  
 -----

|   |           |           |           |
|---|-----------|-----------|-----------|
| C | -4.504033 | -0.920683 | 0.000308  |
| C | -3.127093 | -0.893301 | 0.000126  |
| C | -2.419244 | 0.339569  | 0.000223  |
| C | -3.163261 | 1.575837  | 0.000515  |
| C | -4.557731 | 1.454747  | 0.000684  |
| C | -5.258648 | 0.290196  | 0.000598  |
| H | -5.031294 | -1.871634 | 0.000231  |
| H | -2.540489 | -1.806161 | -0.000096 |
| C | -2.430469 | 2.790540  | 0.000605  |
| H | -6.344980 | 0.262517  | 0.000740  |
| C | -1.056940 | 2.739936  | 0.000410  |
| C | -0.418808 | 1.473394  | 0.000131  |
| H | -2.965623 | 3.735710  | 0.000823  |
| H | -0.458214 | 3.645673  | 0.000467  |
| H | 0.669718  | 1.421647  | -0.000030 |
| N | -1.055620 | 0.319689  | 0.000036  |

## Statistical Thermodynamic Analysis

Temperature= 298.150 Kelvin Pressure= 1.00000 Atm  
 =====

SCF Energy= -401.243661015 Predicted Change= -3.216854D-07  
 Zero-point correction (ZPE)= -401.1206 0.12305  
 Internal Energy (U)= -401.1139 0.12969  
 Enthalpy (H)= -401.1130 0.13063  
 Gibbs Free Energy (G)= -401.1523 0.09129  
 -----

Frequencies -- 172.9781 185.3567 379.6658

Supporting Information: **7chloroquinoline.out**

-----  
 Using Gaussian 03: IA32L-G03RevC.02 12-Jun-2004  
 =====

# opt freq nosymm ub3lyp/6-31g(d) geom=connectivity  
 #N Geom=AllCheck Guess=Read SCRF=Check GenChk UB3LYP/6-31G(d) Freq  
 -----

Pointgroup= C1 Stoichiometry= C9H6ClN C1[X(C9H6ClN)] #Atoms= 17  
 Charge = 0 Multiplicity = 1  
 -----

SCF Energy= -861.526303519 Predicted Change= -6.256611D-07  
 =====

Optimization completed. {Found 2 times}  
 Item Max Val. Criteria Pass? RMS Val. Criteria Pass?  
 Force 0.00025 || 0.00045 [ YES ] 0.00005 || 0.00030 [ YES ]  
 Displ 0.00094 || 0.00180 [ YES ] 0.00094 || 0.00180 [ YES ]  
 -----

Atomic Coordinates (Angstroms)  
 Type X Y Z  
 -----

|    |           |           |           |
|----|-----------|-----------|-----------|
| C  | -4.491660 | -0.907632 | 0.000309  |
| C  | -3.117162 | -0.898892 | 0.000117  |
| C  | -2.425967 | 0.341544  | 0.000213  |
| C  | -3.173543 | 1.561586  | 0.000516  |
| C  | -4.591603 | 1.500374  | 0.000712  |
| C  | -5.246614 | 0.290966  | 0.000608  |
| H  | -2.536967 | -1.814249 | -0.000111 |
| C  | -2.443413 | 2.776950  | 0.000614  |
| H  | -5.160973 | 2.426647  | 0.000948  |
| H  | -6.329914 | 0.240072  | 0.000753  |
| C  | -1.069355 | 2.734958  | 0.000415  |
| C  | -0.427655 | 1.470107  | 0.000114  |
| H  | -2.979090 | 3.723416  | 0.000845  |
| H  | -0.474178 | 3.642895  | 0.000487  |
| H  | 0.661152  | 1.421858  | -0.000032 |
| N  | -1.060441 | 0.314170  | 0.000026  |
| Cl | -5.356648 | -2.437589 | 0.000187  |

## Statistical Thermodynamic Analysis

Temperature= 298.150 Kelvin Pressure= 1.00000 Atm  
 =====

SCF Energy= -861.526303519 Predicted Change= -6.256611D-07  
 Zero-point correction (ZPE)= -861.3999 0.12630  
 Internal Energy (U)= -861.3921 0.13419  
 Enthalpy (H)= -861.3911 0.13514  
 Gibbs Free Energy (G)= -861.4333 0.09298  
 -----

Frequencies -- 101.5030 187.0534 221.0184

Supporting Information: **7radicalquinoline.out**

-----  
 Using Gaussian 03: IA32L-G03RevC.02 12-Jun-2004  
 =====

# opt freq nosymm ub3lyp/6-31g(d) geom=connectivity  
 #N Geom=AllCheck Guess=Read SCRF=Check GenChk UB3LYP/6-31G(d) Freq  
 -----

Pointgroup= C1 Stoichiometry= C9H6N(2) C1[X(C9H6N)] #Atoms= 16  
 Charge = 0 Multiplicity = 2  
 -----

SCF Energy= -401.243328641 Predicted Change= -1.732478D-07  
 =====

Optimization completed. {Found 2 times}  
 Item Max Val. Criteria Pass? RMS Val. Criteria Pass?  
 Force 0.00016 || 0.00045 [ YES ] 0.00003 || 0.00030 [ YES ]  
 Displ 0.00041 || 0.00180 [ YES ] 0.00041 || 0.00180 [ YES ]  
 -----

Atomic Coordinates (Angstroms)  
 Type X Y Z  
 -----

|   |           |           |           |
|---|-----------|-----------|-----------|
| C | -4.471740 | -0.864567 | 0.000312  |
| C | -3.114783 | -0.914246 | 0.000112  |
| C | -2.416065 | 0.333513  | 0.000217  |
| C | -3.174855 | 1.551764  | 0.000521  |
| C | -4.595289 | 1.502520  | 0.000712  |
| C | -5.260473 | 0.290062  | 0.000611  |
| H | -2.535650 | -1.832817 | -0.000119 |
| C | -2.446283 | 2.768516  | 0.000616  |
| H | -5.155342 | 2.435738  | 0.000943  |
| H | -6.345840 | 0.244372  | 0.000756  |
| C | -1.071915 | 2.733861  | 0.000417  |
| C | -0.424165 | 1.473242  | 0.000126  |
| H | -2.984819 | 3.713566  | 0.000845  |
| H | -0.482170 | 3.645530  | 0.000480  |
| H | 0.664818  | 1.429449  | -0.000039 |
| N | -1.052813 | 0.314267  | 0.000024  |

## Statistical Thermodynamic Analysis

Temperature= 298.150 Kelvin Pressure= 1.00000 Atm  
 =====

SCF Energy= -401.243328641 Predicted Change= -1.732478D-07  
 Zero-point correction (ZPE)= -401.1204 0.12285  
 Internal Energy (U)= -401.1138 0.12949  
 Enthalpy (H)= -401.1128 0.13043  
 Gibbs Free Energy (G)= -401.1522 0.09112  
 -----

Frequencies -- 182.9832 186.7028 384.6681

Supporting Information: **8chloroquinoline.out**

-----  
 Using Gaussian 03: IA32L-G03RevC.02 12-Jun-2004  
 =====

# opt freq nosymm ub3lyp/6-31g(d) geom=connectivity  
 #N Geom=AllCheck Guess=Read SCRF=Check GenChk UB3LYP/6-31G(d) Freq  
 -----

Pointgroup= C1 Stoichiometry= C9H6ClN C1[X(C9H6ClN)] #Atoms= 17  
 Charge = 0 Multiplicity = 1  
 -----

SCF Energy= -861.523055296 Predicted Change= -2.384586D-07  
 =====

Optimization completed. {Found 2 times}  
 Item Max Val. Criteria Pass? RMS Val. Criteria Pass?  
 Force 0.00016 || 0.00045 [ YES ] 0.00003 || 0.00030 [ YES ]  
 Displ 0.00062 || 0.00180 [ YES ] 0.00062 || 0.00180 [ YES ]  
 -----

Atomic Coordinates (Angstroms)  
 Type X Y Z  
 -----

|    |           |           |           |
|----|-----------|-----------|-----------|
| C  | -4.499741 | -0.919928 | 0.000308  |
| C  | -3.122508 | -0.897195 | 0.000117  |
| C  | -2.403447 | 0.337038  | 0.000216  |
| C  | -3.167322 | 1.550726  | 0.000519  |
| C  | -4.584963 | 1.501577  | 0.000711  |
| C  | -5.234061 | 0.289141  | 0.000607  |
| C  | -2.442510 | 2.770813  | 0.000615  |
| H  | -5.145232 | 2.433068  | 0.000941  |
| H  | -6.319418 | 0.246393  | 0.000753  |
| C  | -1.069163 | 2.745381  | 0.000418  |
| C  | -0.417346 | 1.486807  | 0.000125  |
| H  | -2.988945 | 3.711069  | 0.000844  |
| H  | -0.484196 | 3.660079  | 0.000483  |
| H  | 0.671467  | 1.444253  | -0.000036 |
| N  | -1.043525 | 0.328236  | 0.000025  |
| H  | -5.018834 | -1.872441 | 0.000226  |
| Cl | -2.241345 | -2.407469 | -0.000252 |

## Statistical Thermodynamic Analysis

Temperature= 298.150 Kelvin Pressure= 1.00000 Atm  
 =====

SCF Energy= -861.523055296 Predicted Change= -2.384586D-07  
 Zero-point correction (ZPE)= -861.3966 0.12636  
 Internal Energy (U)= -861.3888 0.13424  
 Enthalpy (H)= -861.3878 0.13519  
 Gibbs Free Energy (G)= -861.4299 0.09311  
 -----

Frequencies -- 116.8171 177.2821 208.1117



Supporting Information: **8radicalquinoline.out**

-----  
 Using Gaussian 03: IA32L-G03RevC.02 12-Jun-2004  
 =====

# opt freq nosymm ub3lyp/6-31g(d) geom=connectivity  
 #N Geom=AllCheck Guess=Read SCRF=Check GenChk UB3LYP/6-31G(d) Freq  
 -----

Pointgroup= C1 Stoichiometry= C9H6N(2) C1[X(C9H6N)] #Atoms= 16  
 Charge = 0 Multiplicity = 2  
 -----

SCF Energy= -401.239922736 Predicted Change= -1.768086D-07  
 =====

Optimization completed. {Found 2 times}  
 Item Max Val. Criteria Pass? RMS Val. Criteria Pass?  
 Force 0.00019 || 0.00045 [ YES ] 0.00003 || 0.00030 [ YES ]  
 Displ 0.00054 || 0.00180 [ YES ] 0.00054 || 0.00180 [ YES ]  
 -----

Atomic Coordinates (Angstroms)  
 Type X Y Z  
 -----

|   |           |           |           |
|---|-----------|-----------|-----------|
| C | -4.502875 | -0.936953 | 0.000306  |
| C | -3.146932 | -0.849310 | 0.000130  |
| C | -2.395951 | 0.338940  | 0.000216  |
| C | -3.165999 | 1.556945  | 0.000520  |
| C | -4.585898 | 1.493009  | 0.000710  |
| C | -5.242327 | 0.282495  | 0.000606  |
| C | -2.439534 | 2.775685  | 0.000615  |
| H | -5.149534 | 2.422822  | 0.000940  |
| H | -6.328824 | 0.246913  | 0.000753  |
| C | -1.065698 | 2.743970  | 0.000417  |
| C | -0.411550 | 1.485290  | 0.000122  |
| H | -2.981224 | 3.719169  | 0.000845  |
| H | -0.478936 | 3.657679  | 0.000483  |
| H | 0.677628  | 1.448346  | -0.000036 |
| N | -1.031271 | 0.322732  | 0.000022  |
| H | -5.020819 | -1.892714 | 0.000223  |

## Statistical Thermodynamic Analysis

Temperature= 298.150 Kelvin Pressure= 1.00000 Atm  
 =====

SCF Energy= -401.239922736 Predicted Change= -1.768086D-07  
 Zero-point correction (ZPE)= -401.1170 0.12292  
 Internal Energy (U)= -401.1103 0.12957  
 Enthalpy (H)= -401.1094 0.13051  
 Gibbs Free Energy (G)= -401.1487 0.09115  
 -----

Frequencies -- 174.1662 183.5638 375.5701

**Chloroquinoxalines**Supporting Information: **2chloroquinoxaline.out**-----  
Using Gaussian 03: IA32L-G03RevC.02 12-Jun-2004  
=====# opt freq nosymm ub3lyp/6-31g(d) geom=connectivity  
#N Geom=AllCheck Guess=Read SCRF=Check GenChk UB3LYP/6-31G(d) Freq  
-----Pointgroup= C1 Stoichiometry= C8H5ClN2 C1[X(C8H5ClN2)] #Atoms= 16  
Charge = 0 Multiplicity = 1  
-----SCF Energy= -877.563057996 Predicted Change= -9.241329D-07  
=====Optimization completed. {Found 2 times}  
Item Max Val. Criteria Pass? RMS Val. Criteria Pass?  
Force 0.00027 || 0.00045 [ YES ] 0.00007 || 0.00030 [ YES ]  
Displ 0.00105 || 0.00180 [ YES ] 0.00105 || 0.00180 [ YES ]  
-----Atomic Coordinates (Angstroms)  
Type X Y Z  
-----

|    |           |           |           |
|----|-----------|-----------|-----------|
| C  | 0.011736  | 0.014353  | 0.000001  |
| C  | 1.389902  | -0.000190 | 0.000001  |
| C  | 2.103508  | 1.222428  | 0.000001  |
| C  | 1.386950  | 2.459322  | 0.000000  |
| C  | -0.029555 | 2.442763  | 0.000001  |
| C  | -0.701181 | 1.239611  | 0.000001  |
| H  | -0.538854 | -0.922153 | 0.000001  |
| H  | -0.551044 | 3.394771  | 0.000001  |
| C  | 4.058917  | 2.366208  | -0.000002 |
| N  | 3.471243  | 1.208596  | -0.000001 |
| H  | -1.787306 | 1.224414  | 0.000001  |
| H  | 1.957903  | -0.924997 | 0.000000  |
| C  | 3.360940  | 3.611324  | 0.000000  |
| H  | 3.912189  | 4.548600  | 0.000001  |
| N  | 2.050467  | 3.654140  | 0.000000  |
| Cl | 5.817996  | 2.412487  | 0.000002  |

-----  
Statistical Thermodynamic AnalysisTemperature= 298.150 Kelvin Pressure= 1.00000 Atm  
=====SCF Energy= -877.563057996 Predicted Change= -9.241329D-07  
Zero-point correction (ZPE)= -877.4488 0.11417  
Internal Energy (U)= -877.4411 0.12192  
Enthalpy (H)= -877.4401 0.12287  
Gibbs Free Energy (G)= -877.4821 0.08091  
-----

Frequencies -- 96.7023 180.8147 222.0606

Supporting Information: **2radicalquinoxaline.out**

-----  
 Using Gaussian 03: AM64L-G03RevC.02 12-Jun-2004  
 =====

# opt freq nosymm ub3lyp/6-31g(d) geom=connectivity  
 #N Geom=AllCheck Guess=Read SCRF=Check GenChk UB3LYP/6-31G(d) Freq  
 -----

Pointgroup= C1 Stoichiometry= C8H5N2(2) C1[X(C8H5N2)] #Atoms= 15  
 Charge = 0 Multiplicity = 2  
 -----

SCF Energy= -417.287775116 Predicted Change= -1.458618D-07  
 =====

Optimization completed. {Found 2 times}  
 Item Max Val. Criteria Pass? RMS Val. Criteria Pass?  
 Force 0.00017 || 0.00045 [ YES ] 0.00003 || 0.00030 [ YES ]  
 Displ 0.00044 || 0.00180 [ YES ] 0.00044 || 0.00180 [ YES ]  
 -----

Atomic Coordinates (Angstroms)  
 Type X Y Z  
 -----

|   |           |           |           |
|---|-----------|-----------|-----------|
| C | 0.005359  | 0.010456  | 0.000001  |
| C | 1.385265  | -0.011381 | 0.000000  |
| C | 2.098061  | 1.206572  | 0.000000  |
| C | 1.393399  | 2.452904  | 0.000000  |
| C | -0.023335 | 2.439266  | 0.000001  |
| C | -0.700320 | 1.238024  | 0.000001  |
| H | -0.549668 | -0.923498 | 0.000001  |
| H | -0.543253 | 3.392041  | 0.000001  |
| C | 4.056238  | 2.368178  | -0.000001 |
| N | 3.473256  | 1.240003  | 0.000000  |
| H | -1.786532 | 1.228443  | 0.000001  |
| H | 1.946293  | -0.940558 | 0.000000  |
| C | 3.374297  | 3.622750  | 0.000001  |
| H | 3.907548  | 4.568984  | -0.000001 |
| N | 2.059206  | 3.647005  | 0.000001  |

## Statistical Thermodynamic Analysis

Temperature= 298.150 Kelvin Pressure= 1.00000 Atm  
 =====

SCF Energy= -417.287775116 Predicted Change= -1.458618D-07  
 Zero-point correction (ZPE)= -417.1766 0.11113  
 Internal Energy (U)= -417.1701 0.11766  
 Enthalpy (H)= -417.1691 0.11860  
 Gibbs Free Energy (G)= -417.2083 0.07946  
 -----

Frequencies -- 176.2603 192.2354 399.3007

Supporting Information: **3chloroquinoxaline.out**

-----  
 Using Gaussian 03: IA32L-G03RevC.02 12-Jun-2004  
 =====

# opt freq nosymm ub3lyp/6-31g(d) geom=connectivity  
 #N Geom=AllCheck Guess=Read SCRF=Check GenChk UB3LYP/6-31G(d) Freq  
 -----

Pointgroup= C1 Stoichiometry= C8H5ClN2 C1[X(C8H5ClN2)] #Atoms= 16  
 Charge = 0 Multiplicity = 1  
 -----

SCF Energy= -877.563078948 Predicted Change= -1.000454D-06  
 =====

Optimization completed. {Found 2 times}  
 Item Max Val. Criteria Pass? RMS Val. Criteria Pass?  
 Force 0.00028 || 0.00045 [ YES ] 0.00007 || 0.00030 [ YES ]  
 Displ 0.00157 || 0.00180 [ YES ] 0.00157 || 0.00180 [ YES ]  
 -----

Atomic Coordinates (Angstroms)  
 Type X Y Z  
 -----

|    |           |           |           |
|----|-----------|-----------|-----------|
| C  | 0.013816  | 0.014130  | 0.000001  |
| C  | 1.391710  | 0.007138  | 0.000004  |
| C  | 2.102588  | 1.232096  | 0.000004  |
| C  | 1.378783  | 2.464769  | 0.000000  |
| C  | -0.037152 | 2.444541  | -0.000003 |
| C  | -0.702291 | 1.237598  | -0.000002 |
| H  | -0.533841 | -0.923974 | 0.000001  |
| H  | -0.563215 | 3.393924  | -0.000005 |
| C  | 4.076687  | 2.383947  | 0.000006  |
| N  | 3.469258  | 1.221949  | 0.000007  |
| H  | 5.163679  | 2.401949  | 0.000009  |
| H  | -1.788461 | 1.218995  | -0.000005 |
| H  | 1.964523  | -0.914811 | 0.000007  |
| C  | 3.336093  | 3.604194  | 0.000002  |
| N  | 2.039210  | 3.662623  | 0.000000  |
| Cl | 4.243440  | 5.112357  | 0.000003  |

## Statistical Thermodynamic Analysis

Temperature= 298.150 Kelvin Pressure= 1.00000 Atm  
 =====

SCF Energy= -877.563078948 Predicted Change= -1.000454D-06  
 Zero-point correction (ZPE)= -877.4489 0.11417  
 Internal Energy (U)= -877.4411 0.12193  
 Enthalpy (H)= -877.4402 0.12287  
 Gibbs Free Energy (G)= -877.4821 0.08091  
 -----

Frequencies -- 97.1325 180.4152 222.4456

Supporting Information: **3radicalquinoxaline.out**

-----  
 Using Gaussian 03: AM64L-G03RevC.02 12-Jun-2004  
 =====

# opt freq nosymm ub3lyp/6-31g(d) geom=connectivity  
 #N Geom=AllCheck Guess=Read SCRF=Check GenChk UB3LYP/6-31G(d) Freq  
 -----

Pointgroup= C1 Stoichiometry= C8H5N2(2) C1[X(C8H5N2)] #Atoms= 15  
 Charge = 0 Multiplicity = 2  
 -----

SCF Energy= -417.287777888 Predicted Change= -1.480013D-07  
 =====

Optimization completed. {Found 2 times}  
 Item Max Val. Criteria Pass? RMS Val. Criteria Pass?  
 Force 0.00017 || 0.00045 [ YES ] 0.00003 || 0.00030 [ YES ]  
 Displ 0.00053 || 0.00180 [ YES ] 0.00053 || 0.00180 [ YES ]  
 -----

Atomic Coordinates (Angstroms)  
 Type X Y Z  
 -----

|   |           |           |           |
|---|-----------|-----------|-----------|
| C | 0.012729  | 0.015769  | 0.000001  |
| C | 1.391597  | 0.014191  | 0.000004  |
| C | 2.100444  | 1.240920  | 0.000004  |
| C | 1.361896  | 2.467480  | 0.000000  |
| C | -0.049137 | 2.446119  | -0.000003 |
| C | -0.708969 | 1.233987  | -0.000002 |
| H | -0.529947 | -0.925222 | 0.000001  |
| H | -0.582135 | 3.391644  | -0.000006 |
| C | 4.093411  | 2.390032  | 0.000006  |
| N | 3.467597  | 1.233136  | 0.000007  |
| H | 5.179555  | 2.388848  | 0.000009  |
| H | -1.795130 | 1.210149  | -0.000005 |
| H | 1.965366  | -0.907162 | 0.000007  |
| C | 3.336564  | 3.600859  | 0.000003  |
| N | 2.067544  | 3.648319  | 0.000000  |

## Statistical Thermodynamic Analysis

Temperature= 298.150 Kelvin Pressure= 1.00000 Atm  
 =====

SCF Energy= -417.287777888 Predicted Change= -1.480013D-07  
 Zero-point correction (ZPE)= -417.1766 0.11113  
 Internal Energy (U)= -417.1701 0.11766  
 Enthalpy (H)= -417.1691 0.11860  
 Gibbs Free Energy (G)= -417.2083 0.07946  
 -----

Frequencies -- 175.8842 192.6801 399.3225

Supporting Information: **5radicalquinoxaline.out**

-----  
 Using Gaussian 03: IA32L-G03RevC.02 12-Jun-2004  
 =====

# opt freq nosymm ub3lyp/6-31g(d) geom=connectivity  
 #N Geom=AllCheck Guess=Read SCRF=Check GenChk UB3LYP/6-31G(d) Freq  
 -----

Pointgroup= C1 Stoichiometry= C8H5N2(2) C1[X(C8H5N2)] #Atoms= 15  
 Charge = 0 Multiplicity = 2  
 -----

SCF Energy= -417.274648555 Predicted Change= -2.313517D-07  
 =====

Optimization completed. {Found 2 times}  
 Item Max Val. Criteria Pass? RMS Val. Criteria Pass?  
 Force 0.00022 || 0.00045 [ YES ] 0.00004 || 0.00030 [ YES ]  
 Displ 0.00058 || 0.00180 [ YES ] 0.00058 || 0.00180 [ YES ]  
 -----

Atomic Coordinates (Angstroms)  
 Type X Y Z  
 -----

|   |           |           |           |
|---|-----------|-----------|-----------|
| C | 0.006840  | 0.013306  | 0.000000  |
| C | 1.383721  | 0.011941  | 0.000003  |
| C | 2.105980  | 1.234433  | 0.000004  |
| C | 1.394898  | 2.488455  | 0.000001  |
| C | -0.005129 | 2.398084  | -0.000002 |
| C | -0.719532 | 1.241684  | -0.000003 |
| H | -0.541301 | -0.925432 | -0.000001 |
| C | 4.079245  | 2.377582  | 0.000008  |
| N | 3.469676  | 1.211793  | 0.000007  |
| H | 5.168395  | 2.372806  | 0.000010  |
| H | -1.806444 | 1.234483  | -0.000005 |
| H | 1.954683  | -0.910886 | 0.000005  |
| C | 3.372487  | 3.611366  | 0.000006  |
| H | 3.921076  | 4.552279  | 0.000006  |
| N | 2.058750  | 3.680485  | 0.000002  |

## Statistical Thermodynamic Analysis

Temperature= 298.150 Kelvin Pressure= 1.00000 Atm  
 =====

SCF Energy= -417.274648555 Predicted Change= -2.313517D-07  
 Zero-point correction (ZPE)= -417.1637 0.11089  
 Internal Energy (U)= -417.1572 0.11741  
 Enthalpy (H)= -417.1562 0.11835  
 Gibbs Free Energy (G)= -417.1954 0.07919  
 -----

Frequencies -- 172.1073 180.7919 395.2846

Supporting Information: **5chloroquinoxaline.out**

-----  
 Using Gaussian 03: IA32L-G03RevC.02 12-Jun-2004  
 =====

# opt freq nosymm ub3lyp/6-31g(d) geom=connectivity  
 #N Geom=AllCheck Guess=Read SCRF=Check GenChk UB3LYP/6-31G(d) Freq  
 -----

Pointgroup= C1 Stoichiometry= C8H5ClN2 C1[X(C8H5ClN2)] #Atoms= 16  
 Charge = 0 Multiplicity = 1  
 -----

SCF Energy= -877.556970366 Predicted Change= -2.201497D-07  
 =====

Optimization completed. {Found 2 times}  
 Item Max Val. Criteria Pass? RMS Val. Criteria Pass?  
 Force 0.00016 || 0.00045 [ YES ] 0.00003 || 0.00030 [ YES ]  
 Displ 0.00048 || 0.00180 [ YES ] 0.00048 || 0.00180 [ YES ]  
 -----

Atomic Coordinates (Angstroms)  
 Type X Y Z  
 -----

|    |           |           |           |
|----|-----------|-----------|-----------|
| C  | 0.015132  | 0.018171  | 0.000000  |
| C  | 1.390711  | 0.007780  | 0.000003  |
| C  | 2.101348  | 1.233738  | 0.000004  |
| C  | 1.391948  | 2.479710  | 0.000002  |
| C  | -0.033552 | 2.441276  | -0.000002 |
| C  | -0.703902 | 1.237972  | -0.000003 |
| H  | -0.539250 | -0.915780 | -0.000001 |
| C  | 4.077057  | 2.373889  | 0.000007  |
| N  | 3.465875  | 1.209210  | 0.000007  |
| H  | 5.166034  | 2.368017  | 0.000011  |
| H  | -1.788591 | 1.230546  | -0.000005 |
| H  | 1.963433  | -0.913742 | 0.000005  |
| C  | 3.369273  | 3.605766  | 0.000005  |
| H  | 3.912420  | 4.549637  | 0.000007  |
| N  | 2.055408  | 3.666187  | 0.000002  |
| Cl | -0.936798 | 3.937767  | -0.000006 |

## Statistical Thermodynamic Analysis

Temperature= 298.150 Kelvin Pressure= 1.00000 Atm  
 =====

SCF Energy= -877.556970366 Predicted Change= -2.201497D-07  
 Zero-point correction (ZPE)= -877.4426 0.11433  
 Internal Energy (U)= -877.4348 0.12208  
 Enthalpy (H)= -877.4339 0.12303  
 Gibbs Free Energy (G)= -877.4758 0.08112  
 -----

Frequencies -- 113.9398 183.6064 209.4737

Supporting Information: **6chloroquinoxaline.out**

-----  
 Using Gaussian 03: IA32L-G03RevC.02 12-Jun-2004  
 =====

# opt freq nosymm ub3lyp/6-31g(d) geom=connectivity  
 #N Geom=AllCheck Guess=Read SCRF=Check GenChk UB3LYP/6-31G(d) Freq  
 -----

Pointgroup= C1 Stoichiometry= C8H5ClN2 C1[X(C8H5ClN2)] #Atoms= 16  
 Charge = 0 Multiplicity = 1  
 -----

SCF Energy= -877.559866040 Predicted Change= -2.515398D-07  
 =====

Optimization completed. {Found 2 times}  
 Item Max Val. Criteria Pass? RMS Val. Criteria Pass?  
 Force 0.00016 || 0.00045 [ YES ] 0.00003 || 0.00030 [ YES ]  
 Displ 0.00058 || 0.00180 [ YES ] 0.00058 || 0.00180 [ YES ]  
 -----

Atomic Coordinates (Angstroms)  
 Type X Y Z  
 -----

|    |           |           |           |
|----|-----------|-----------|-----------|
| C  | 0.012690  | 0.007778  | 0.000000  |
| C  | 1.388020  | 0.005307  | 0.000003  |
| C  | 2.107969  | 1.227406  | 0.000005  |
| C  | 1.386767  | 2.462299  | 0.000002  |
| C  | -0.031160 | 2.449472  | -0.000002 |
| C  | -0.687386 | 1.241088  | -0.000003 |
| H  | -0.547815 | -0.920857 | -0.000001 |
| H  | -0.562585 | 3.394313  | -0.000004 |
| C  | 4.071380  | 2.377253  | 0.000007  |
| N  | 3.471303  | 1.205423  | 0.000007  |
| H  | 5.160277  | 2.381873  | 0.000011  |
| H  | 1.953132  | -0.921337 | 0.000005  |
| C  | 3.354167  | 3.604978  | 0.000005  |
| H  | 3.894525  | 4.550615  | 0.000007  |
| N  | 2.039249  | 3.661171  | 0.000002  |
| Cl | -2.442509 | 1.201789  | -0.000007 |

## Statistical Thermodynamic Analysis

Temperature= 298.150 Kelvin Pressure= 1.00000 Atm  
 =====

SCF Energy= -877.559866040 Predicted Change= -2.515398D-07  
 Zero-point correction (ZPE)= -877.4456 0.11426  
 Internal Energy (U)= -877.4378 0.12202  
 Enthalpy (H)= -877.4369 0.12296  
 Gibbs Free Energy (G)= -877.4788 0.08101  
 -----

Frequencies -- 102.8009 180.0518 226.4523



Supporting Information: **6radicalquinoxaline.out**

-----  
 Using Gaussian 03: IA32L-G03RevC.02 12-Jun-2004  
 =====

# opt freq nosymm ub3lyp/6-31g(d) geom=connectivity  
 #N Geom=AllCheck Guess=Read SCRF=Check GenChk UB3LYP/6-31G(d) Freq  
 -----

Pointgroup= C1 Stoichiometry= C8H5N2(2) C1[X(C8H5N2)] #Atoms= 15  
 Charge = 0 Multiplicity = 2  
 -----

SCF Energy= -417.277145490 Predicted Change= -1.330551D-07  
 =====

Optimization completed. {Found 2 times}  
 Item Max Val. Criteria Pass? RMS Val. Criteria Pass?  
 Force 0.00013 || 0.00045 [ YES ] 0.00003 || 0.00030 [ YES ]  
 Displ 0.00041 || 0.00180 [ YES ] 0.00041 || 0.00180 [ YES ]  
 -----

Atomic Coordinates (Angstroms)  
 Type X Y Z  
 -----

|   |           |           |           |
|---|-----------|-----------|-----------|
| C | 0.004279  | -0.003806 | 0.000000  |
| C | 1.386911  | 0.000792  | 0.000003  |
| C | 2.098069  | 1.230847  | 0.000004  |
| C | 1.383812  | 2.474265  | 0.000001  |
| C | -0.043728 | 2.459534  | -0.000002 |
| C | -0.639579 | 1.238787  | -0.000003 |
| H | -0.554039 | -0.935680 | -0.000001 |
| H | -0.579182 | 3.404341  | -0.000004 |
| C | 4.068370  | 2.374998  | 0.000009  |
| N | 3.462329  | 1.206581  | 0.000007  |
| H | 5.157484  | 2.374080  | 0.000010  |
| H | 1.962584  | -0.920412 | 0.000005  |
| C | 3.358060  | 3.605715  | 0.000006  |
| H | 3.902315  | 4.549291  | 0.000006  |
| N | 2.042848  | 3.667450  | 0.000002  |

## Statistical Thermodynamic Analysis

Temperature= 298.150 Kelvin Pressure= 1.00000 Atm  
 =====

SCF Energy= -417.277145490 Predicted Change= -1.330551D-07  
 Zero-point correction (ZPE)= -417.1663 0.11082  
 Internal Energy (U)= -417.1598 0.11733  
 Enthalpy (H)= -417.1588 0.11828  
 Gibbs Free Energy (G)= -417.1979 0.07915  
 -----

Frequencies -- 176.3480 191.0033 400.1170

Supporting Information: **7chloroquinoxaline.out**

-----  
 Using Gaussian 03: IA32L-G03RevC.02 12-Jun-2004  
 =====

# opt freq nosymm ub3lyp/6-31g(d) geom=connectivity  
 #N Geom=AllCheck Guess=Read SCRF=Check GenChk UB3LYP/6-31G(d) Freq  
 -----

Pointgroup= C1 Stoichiometry= C8H5ClN2 C1[X(C8H5ClN2)] #Atoms= 16  
 Charge = 0 Multiplicity = 1  
 -----

SCF Energy= -877.559864299 Predicted Change= -2.350302D-07  
 =====

Optimization completed. {Found 2 times}  
 Item Max Val. Criteria Pass? RMS Val. Criteria Pass?  
 Force 0.00013 || 0.00045 [ YES ] 0.00003 || 0.00030 [ YES ]  
 Displ 0.00051 || 0.00180 [ YES ] 0.00051 || 0.00180 [ YES ]  
 -----

Atomic Coordinates (Angstroms)  
 Type X Y Z  
 -----

|    |           |           |           |
|----|-----------|-----------|-----------|
| C  | 0.022687  | 0.024187  | -0.000001 |
| C  | 1.397538  | -0.000017 | 0.000003  |
| C  | 2.107167  | 1.227409  | 0.000005  |
| C  | 1.387934  | 2.463438  | 0.000002  |
| C  | -0.030415 | 2.438954  | -0.000002 |
| C  | -0.705781 | 1.240891  | -0.000003 |
| H  | -0.558537 | 3.387217  | -0.000004 |
| C  | 4.070830  | 2.376688  | 0.000007  |
| N  | 3.471863  | 1.204684  | 0.000007  |
| H  | 5.159867  | 2.380372  | 0.000011  |
| H  | -1.789913 | 1.210607  | -0.000005 |
| H  | 1.958067  | -0.927762 | 0.000005  |
| C  | 3.355702  | 3.605620  | 0.000005  |
| H  | 3.896753  | 4.550699  | 0.000007  |
| N  | 2.040403  | 3.660757  | 0.000002  |
| Cl | -0.876182 | -1.483994 | -0.000002 |

## Statistical Thermodynamic Analysis

Temperature= 298.150 Kelvin Pressure= 1.00000 Atm  
 =====

SCF Energy= -877.559864299 Predicted Change= -2.350302D-07  
 Zero-point correction (ZPE)= -877.4456 0.11426  
 Internal Energy (U)= -877.4378 0.12202  
 Enthalpy (H)= -877.4369 0.12296  
 Gibbs Free Energy (G)= -877.4788 0.08100  
 -----

Frequencies -- 102.7352 179.5773 226.0400

Supporting Information: **7radicalquinoxaline.out**

-----  
 Using Gaussian 03: IA32L-G03RevC.02 12-Jun-2004  
 =====

# opt freq nosymm ub3lyp/6-31g(d) geom=connectivity  
 #N Geom=AllCheck Guess=Read SCRF=Check GenChk UB3LYP/6-31G(d) Freq  
 -----

Pointgroup= C1 Stoichiometry= C8H5N2(2) C1[X(C8H5N2)] #Atoms= 15  
 Charge = 0 Multiplicity = 2  
 -----

SCF Energy= -417.277149641 Predicted Change= -1.354701D-07  
 =====

Optimization completed. {Found 2 times}  
 Item Max Val. Criteria Pass? RMS Val. Criteria Pass?  
 Force 0.00013 || 0.00045 [ YES ] 0.00003 || 0.00030 [ YES ]  
 Displ 0.00037 || 0.00180 [ YES ] 0.00037 || 0.00180 [ YES ]  
 -----

Atomic Coordinates (Angstroms)  
 Type X Y Z  
 -----

|   |           |           |           |
|---|-----------|-----------|-----------|
| C | 0.044178  | 0.066916  | 0.000000  |
| C | 1.400041  | -0.015995 | 0.000003  |
| C | 2.116205  | 1.219003  | 0.000004  |
| C | 1.385973  | 2.453108  | 0.000001  |
| C | -0.034795 | 2.440281  | -0.000002 |
| C | -0.720002 | 1.239361  | -0.000003 |
| H | -0.552857 | 3.395068  | -0.000004 |
| C | 4.073464  | 2.379531  | 0.000009  |
| N | 3.479211  | 1.204602  | 0.000007  |
| H | 5.162718  | 2.388295  | 0.000010  |
| H | -1.805994 | 1.212573  | -0.000006 |
| H | 1.958453  | -0.947414 | 0.000005  |
| C | 3.352390  | 3.603976  | 0.000006  |
| H | 3.888151  | 4.552200  | 0.000006  |
| N | 2.037029  | 3.652240  | 0.000003  |

## Statistical Thermodynamic Analysis

Temperature= 298.150 Kelvin Pressure= 1.00000 Atm  
 =====

SCF Energy= -417.277149641 Predicted Change= -1.354701D-07  
 Zero-point correction (ZPE)= -417.1663 0.11082  
 Internal Energy (U)= -417.1598 0.11733  
 Enthalpy (H)= -417.1588 0.11828  
 Gibbs Free Energy (G)= -417.1979 0.07916  
 -----

Frequencies -- 176.1404 191.6287 400.1999

Supporting Information: **8chloroquinoxaline.out**

-----  
 Using Gaussian 03: IA32L-G03RevC.02 12-Jun-2004  
 =====

# opt freq nosymm ub3lyp/6-31g(d) geom=connectivity  
 #N Geom=AllCheck Guess=Read SCRF=Check GenChk UB3LYP/6-31G(d) Freq  
 -----

Pointgroup= C1 Stoichiometry= C8H5ClN2 C1[X(C8H5ClN2)] #Atoms= 16  
 Charge = 0 Multiplicity = 1  
 -----

SCF Energy= -877.556950260 Predicted Change= -1.741260D-07  
 =====

Optimization completed. {Found 2 times}  
 Item Max Val. Criteria Pass? RMS Val. Criteria Pass?  
 Force 0.00014 || 0.00045 [ YES ] 0.00003 || 0.00030 [ YES ]  
 Displ 0.00052 || 0.00180 [ YES ] 0.00052 || 0.00180 [ YES ]  
 -----

Atomic Coordinates (Angstroms)  
 Type X Y Z  
 -----

|    |           |           |           |
|----|-----------|-----------|-----------|
| C  | 0.008932  | 0.012444  | 0.000000  |
| C  | 1.386280  | 0.001333  | 0.000003  |
| C  | 2.123601  | 1.221784  | 0.000005  |
| C  | 1.390064  | 2.453731  | 0.000002  |
| C  | -0.026992 | 2.441025  | -0.000002 |
| C  | -0.697118 | 1.239722  | -0.000003 |
| H  | -0.532943 | -0.927225 | -0.000001 |
| H  | -0.545770 | 3.394000  | -0.000004 |
| C  | 4.078702  | 2.386083  | 0.000007  |
| N  | 3.482993  | 1.213373  | 0.000007  |
| H  | 5.167598  | 2.392441  | 0.000010  |
| H  | -1.782977 | 1.218565  | -0.000005 |
| C  | 3.356506  | 3.609572  | 0.000005  |
| H  | 3.889123  | 4.559503  | 0.000007  |
| N  | 2.041986  | 3.652795  | 0.000002  |
| Cl | 2.240824  | -1.523611 | 0.000006  |

## Statistical Thermodynamic Analysis

Temperature= 298.150 Kelvin Pressure= 1.00000 Atm  
 =====

SCF Energy= -877.556950260 Predicted Change= -1.741260D-07  
 Zero-point correction (ZPE)= -877.4426 0.11433  
 Internal Energy (U)= -877.4348 0.12208  
 Enthalpy (H)= -877.4339 0.12302  
 Gibbs Free Energy (G)= -877.4758 0.08111  
 -----

Frequencies -- 114.2676 183.7022 209.2138

Supporting Information: **8radicalquinoxaline.out**

-----  
 Using Gaussian 03: IA32L-G03RevC.02 12-Jun-2004  
 =====

# opt freq nosymm ub3lyp/6-31g(d) geom=connectivity  
 #N Geom=AllCheck Guess=Read SCRF=Check GenChk UB3LYP/6-31G(d) Freq  
 -----

Pointgroup= C1 Stoichiometry= C8H5N2(2) C1[X(C8H5N2)] #Atoms= 15  
 Charge = 0 Multiplicity = 2  
 -----

SCF Energy= -417.274651584 Predicted Change= -2.334779D-07  
 =====

Optimization completed. {Found 2 times}  
 Item Max Val. Criteria Pass? RMS Val. Criteria Pass?  
 Force 0.00022 || 0.00045 [ YES ] 0.00004 || 0.00030 [ YES ]  
 Displ 0.00055 || 0.00180 [ YES ] 0.00055 || 0.00180 [ YES ]  
 -----

Atomic Coordinates (Angstroms)  
 Type X Y Z  
 -----

|   |           |           |           |
|---|-----------|-----------|-----------|
| C | 0.004465  | -0.003114 | 0.000000  |
| C | 1.362815  | 0.047284  | 0.000003  |
| C | 2.132494  | 1.220261  | 0.000004  |
| C | 1.392799  | 2.457621  | 0.000001  |
| C | -0.026866 | 2.433002  | -0.000002 |
| C | -0.705361 | 1.234892  | -0.000003 |
| H | -0.538281 | -0.944842 | -0.000001 |
| H | -0.547618 | 3.385060  | -0.000004 |
| C | 4.085187  | 2.385954  | 0.000008  |
| N | 3.496851  | 1.209284  | 0.000007  |
| H | 5.174273  | 2.398670  | 0.000010  |
| H | -1.792327 | 1.221506  | -0.000005 |
| C | 3.360978  | 3.609575  | 0.000006  |
| H | 3.894355  | 4.559196  | 0.000006  |
| N | 2.046221  | 3.654796  | 0.000002  |

## Statistical Thermodynamic Analysis

Temperature= 298.150 Kelvin Pressure= 1.00000 Atm  
 =====

SCF Energy= -417.274651584 Predicted Change= -2.334779D-07  
 Zero-point correction (ZPE)= -417.1637 0.11090  
 Internal Energy (U)= -417.1572 0.11741  
 Enthalpy (H)= -417.1562 0.11836  
 Gibbs Free Energy (G)= -417.1954 0.07919  
 -----

Frequencies -- 171.8303 180.9243 395.3959

**Chlorooxazoles**Supporting Information: **2chlorooxazole.out**-----  
Using Gaussian 03: IA32L-G03RevC.02 12-Jun-2004  
=====# opt=(modredundant) freq b3lyp/6-31g(d) geom=connectivity  
#N Geom=AllCheck Guess=Read SCRF=Check GenChk RB3LYP/6-31G(d) Freq  
-----Pointgroup= C1 Stoichiometry= C3H2ClNO C1[X(C3H2ClNO)] #Atoms= 8  
Charge = 0 Multiplicity = 1  
-----SCF Energy= -705.659551766 Predicted Change= -1.755875D-07  
=====Optimization completed. {Found 2 times}  
Item Max Val. Criteria Pass? RMS Val. Criteria Pass?  
Force 0.00013 || 0.00045 [ YES ] 0.00004 || 0.00030 [ YES ]  
Displ 0.00085 || 0.00180 [ YES ] 0.00085 || 0.00180 [ YES ]  
-----Atomic Coordinates (Angstroms)  
Type X Y Z  
-----

|    |           |           |           |
|----|-----------|-----------|-----------|
| C  | 1.781309  | -0.682708 | 0.000129  |
| C  | 1.813516  | 0.671307  | 0.000114  |
| C  | -0.215390 | 0.101833  | -0.000077 |
| H  | 2.511624  | -1.475422 | 0.000209  |
| H  | 2.666275  | 1.334577  | 0.000188  |
| N  | 0.511495  | 1.168277  | 0.000015  |
| O  | 0.459971  | -1.070651 | 0.000049  |
| Cl | -1.924397 | -0.000852 | -0.000111 |

-----  
Statistical Thermodynamic AnalysisTemperature= 298.150 Kelvin Pressure= 1.00000 Atm  
=====SCF Energy= -705.659551766 Predicted Change= -1.755875D-07  
Zero-point correction (ZPE)= -705.6103 0.04919  
Internal Energy (U)= -705.6058 0.05375  
Enthalpy (H)= -705.6048 0.05469  
Gibbs Free Energy (G)= -705.6389 0.02062  
-----

Frequencies -- 235.6877 330.4826 506.9654

Supporting Information: **4chlorooxazole.out**

-----  
 Using Gaussian 03: IA32L-G03RevC.02 12-Jun-2004  
 =====

# opt=(modredundant) freq b3lyp/6-31g(d) geom=connectivity  
 #N Geom=AllCheck Guess=Read SCRF=Check GenChk RB3LYP/6-31G(d) Freq  
 -----

Pointgroup= C1 Stoichiometry= C3H2ClNO C1[X(C3H2ClNO)] #Atoms= 8  
 Charge = 0 Multiplicity = 1  
 -----

SCF Energy= -705.661278114 Predicted Change= -1.092745D-06  
 =====

Optimization completed. {Found 2 times}  
 Item Max Val. Criteria Pass? RMS Val. Criteria Pass?  
 Force 0.00041 || 0.00045 [ YES ] 0.00015 || 0.00030 [ YES ]  
 Displ 0.00147 || 0.00180 [ YES ] 0.00147 || 0.00180 [ YES ]  
 -----

Atomic Coordinates (Angstroms)  
 Type X Y Z  
 -----

|    |           |           |           |
|----|-----------|-----------|-----------|
| C  | -0.559319 | 1.102103  | -0.000037 |
| C  | 0.249676  | 0.010902  | -0.000018 |
| C  | -1.724577 | -0.711122 | 0.000072  |
| H  | -0.408639 | 2.168531  | -0.000091 |
| H  | -2.639142 | -1.285635 | 0.000165  |
| N  | -0.503742 | -1.145457 | 0.000104  |
| O  | -1.848806 | 0.639155  | 0.000054  |
| Cl | 1.974691  | -0.022896 | -0.000079 |

-----

## Statistical Thermodynamic Analysis

Temperature= 298.150 Kelvin Pressure= 1.00000 Atm  
 =====

SCF Energy= -705.661278114 Predicted Change= -1.092745D-06  
 Zero-point correction (ZPE)= -705.6119 0.04932  
 Internal Energy (U)= -705.6073 0.05388  
 Enthalpy (H)= -705.6064 0.05483  
 Gibbs Free Energy (G)= -705.6405 0.02073  
 -----

Frequencies -- 255.8144 317.1647 488.6540

Supporting Information: **5chlorooxazole.out**

-----  
 Using Gaussian 03: IA32L-G03RevC.02 12-Jun-2004  
 =====

# opt=(modredundant) freq b3lyp/6-31g(d) geom=connectivity  
 #N Geom=AllCheck Guess=Read SCRF=Check GenChk RB3LYP/6-31G(d) Freq  
 -----

Pointgroup= C1 Stoichiometry= C3H2ClNO C1[X(C3H2ClNO)] #Atoms= 8  
 Charge = 0 Multiplicity = 1  
 -----

SCF Energy= -705.659208744 Predicted Change= -9.468980D-07  
 =====

Optimization completed. {Found 2 times}  
 Item Max Val. Criteria Pass? RMS Val. Criteria Pass?  
 Force 0.00037 || 0.00045 [ YES ] 0.00014 || 0.00030 [ YES ]  
 Displ 0.00147 || 0.00180 [ YES ] 0.00147 || 0.00180 [ YES ]  
 -----

Atomic Coordinates (Angstroms)  
 Type X Y Z  
 -----

|    |           |           |           |
|----|-----------|-----------|-----------|
| C  | -0.241415 | 0.099157  | -0.000023 |
| C  | 0.625445  | 1.144259  | 0.000007  |
| C  | 1.770199  | -0.642525 | 0.000114  |
| H  | 0.411982  | 2.202422  | -0.000034 |
| H  | 2.525176  | -1.414820 | 0.000208  |
| N  | 1.921332  | 0.642052  | 0.000102  |
| O  | 0.473791  | -1.063679 | 0.000061  |
| Cl | -1.947187 | -0.022229 | -0.000116 |

-----

## Statistical Thermodynamic Analysis

Temperature= 298.150 Kelvin Pressure= 1.00000 Atm  
 =====

SCF Energy= -705.659208744 Predicted Change= -9.468980D-07  
 Zero-point correction (ZPE)= -705.6098 0.04932  
 Internal Energy (U)= -705.6053 0.05390  
 Enthalpy (H)= -705.6043 0.05484  
 Gibbs Free Energy (G)= -705.6385 0.02070  
 -----

Frequencies -- 232.0294 309.9802 495.3904



Supporting Information: **2radicaloxazole.out**

-----  
 Using Gaussian 03: IA32L-G03RevC.02 12-Jun-2004  
 =====

# opt nosymm freq ub3lyp/6-31g(d) geom=connectivity  
 #N Geom=AllCheck Guess=Read SCRF=Check GenChk UB3LYP/6-31G(d) Freq  
 -----

Pointgroup= C1 Stoichiometry= C3H2NO(2) C1[X(C3H2NO)] #Atoms= 7  
 Charge = 0 Multiplicity = 2  
 -----

SCF Energy= -245.371296762 Predicted Change= -1.214508D-07  
 =====

Optimization completed. {Found 2 times}  
 Item Max Val. Criteria Pass? RMS Val. Criteria Pass?  
 Force 0.00016 || 0.00045 [ YES ] 0.00005 || 0.00030 [ YES ]  
 Displ 0.00056 || 0.00180 [ YES ] 0.00056 || 0.00180 [ YES ]  
 -----

Atomic Coordinates (Angstroms)  
 Type X Y Z  
 -----

|   |           |           |           |
|---|-----------|-----------|-----------|
| C | 1.783442  | -0.683325 | 0.000120  |
| C | 1.816613  | 0.670901  | 0.000136  |
| C | -0.197472 | 0.103803  | -0.000053 |
| H | 2.513459  | -1.476759 | 0.000188  |
| H | 2.667273  | 1.336925  | 0.000208  |
| N | 0.498441  | 1.166846  | -0.000039 |
| O | 0.447043  | -1.071178 | 0.000066  |

-----

## Statistical Thermodynamic Analysis

Temperature= 298.150 Kelvin Pressure= 1.00000 Atm  
 =====

SCF Energy= -245.371296762 Predicted Change= -1.214508D-07  
 Zero-point correction (ZPE)= -245.3257 0.04559  
 Internal Energy (U)= -245.3221 0.04916  
 Enthalpy (H)= -245.3211 0.05010  
 Gibbs Free Energy (G)= -245.3524 0.01883  
 -----

Frequencies -- 549.8468 607.9399 744.0515

Supporting Information: **4adicaloxazole.out**

-----  
 Using Gaussian 03: IA32L-G03RevC.02 12-Jun-2004  
 =====

# opt nosymm freq ub3lyp/6-31g(d) geom=connectivity  
 #N Geom=AllCheck Guess=Read SCRF=Check GenChk UB3LYP/6-31G(d) Freq  
 -----

Pointgroup= C1 Stoichiometry= C3H2NO(2) C1[X(C3H2NO)] #Atoms= 7  
 Charge = 0 Multiplicity = 2  
 -----

SCF Energy= -245.372737084 Predicted Change= -3.200965D-07  
 =====

Optimization completed. {Found 2 times}  
 Item Max Val. Criteria Pass? RMS Val. Criteria Pass?  
 Force 0.00013 || 0.00045 [ YES ] 0.00005 || 0.00030 [ YES ]  
 Displ 0.00118 || 0.00180 [ YES ] 0.00118 || 0.00180 [ YES ]  
 -----

Atomic Coordinates (Angstroms)  
 Type X Y Z  
 -----

|   |           |           |           |
|---|-----------|-----------|-----------|
| C | -0.548403 | 1.104279  | 0.000128  |
| C | 0.234159  | 0.001297  | 0.000006  |
| C | -1.726034 | -0.710303 | 0.000423  |
| H | -0.407868 | 2.171106  | 0.000099  |
| H | -2.638152 | -1.288996 | 0.000383  |
| N | -0.495567 | -1.136359 | -0.000200 |
| O | -1.852685 | 0.637453  | -0.000589 |

-----

## Statistical Thermodynamic Analysis

Temperature= 298.150 Kelvin Pressure= 1.00000 Atm  
 =====

SCF Energy= -245.372737084 Predicted Change= -3.200965D-07  
 Zero-point correction (ZPE)= -245.3267 0.04602  
 Internal Energy (U)= -245.3231 0.04955  
 Enthalpy (H)= -245.3222 0.05049  
 Gibbs Free Energy (G)= -245.3534 0.01930  
 -----

Frequencies -- 595.3951 657.5187 722.8413

Supporting Information: **5adicaloxazole.out**

-----  
 Using Gaussian 03: IA32L-G03RevC.02 12-Jun-2004  
 =====

# opt nosymm freq ub3lyp/6-31g(d) geom=connectivity  
 #N Geom=AllCheck Guess=Read SCRF=Check GenChk UB3LYP/6-31G(d) Freq  
 -----

Pointgroup= C1 Stoichiometry= C3H2NO(2) C1[X(C3H2NO)] #Atoms= 7  
 Charge = 0 Multiplicity = 2  
 -----

SCF Energy= -245.368246790 Predicted Change= -3.220023D-07  
 =====

Optimization completed. {Found 2 times}  
 Item Max Val. Criteria Pass? RMS Val. Criteria Pass?  
 Force 0.00019 || 0.00045 [ YES ] 0.00007 || 0.00030 [ YES ]  
 Displ 0.00065 || 0.00180 [ YES ] 0.00065 || 0.00180 [ YES ]  
 -----

Atomic Coordinates (Angstroms)  
 Type X Y Z  
 -----

|   |           |           |           |
|---|-----------|-----------|-----------|
| C | -0.222705 | 0.092943  | -0.000027 |
| C | 0.618407  | 1.155512  | -0.000009 |
| C | 1.769176  | -0.649146 | 0.000096  |
| H | 0.409284  | 2.212967  | -0.000055 |
| H | 2.528685  | -1.416816 | 0.000176  |
| N | 1.916395  | 0.638252  | 0.000162  |
| O | 0.467269  | -1.066845 | 0.000092  |

## Statistical Thermodynamic Analysis

Temperature= 298.150 Kelvin Pressure= 1.00000 Atm  
 =====

SCF Energy= -245.368246790 Predicted Change= -3.220023D-07  
 Zero-point correction (ZPE)= -245.3224 0.04578  
 Internal Energy (U)= -245.3189 0.04932  
 Enthalpy (H)= -245.3179 0.05027  
 Gibbs Free Energy (G)= -245.3492 0.01904  
 -----

Frequencies -- 528.4272 663.4536 790.9975

**Chlorothiazoles**Supporting Information: **24dichlorothiazole.out**-----  
Using Gaussian 03: IA32L-G03RevC.02 12-Jun-2004  
=====

# opt freq ub3lyp/6-31g(d)

#N Geom=AllCheck Guess=Read SCRF=Check GenChk UB3LYP/6-31G(d) Freq  
-----

Pointgroup= C1 Stoichiometry= C3HCl2NS C1[X(C3HCl2NS)] #Atoms= 8

Charge = 0 Multiplicity = 1  
-----SCF Energy= -1488.22978446 Predicted Change= -2.616958D-07  
=====

Optimization completed. {Found 2 times}

Item Max Val. Criteria Pass? RMS Val. Criteria Pass?

Force 0.00015 || 0.00045 [ YES ] 0.00004 || 0.00030 [ YES ]

Displ 0.00154 || 0.00180 [ YES ] 0.00154 || 0.00180 [ YES ]  
-----

Atomic Coordinates (Angstroms)

Type X Y Z  
-----

|    |           |           |           |
|----|-----------|-----------|-----------|
| C  | 0.899072  | 1.322739  | 0.000243  |
| C  | 1.182142  | -0.011710 | 0.000571  |
| C  | -0.983299 | -0.207108 | 0.000851  |
| H  | 1.583068  | 2.158749  | -0.000111 |
| N  | 0.121327  | -0.879565 | 0.000401  |
| S  | -0.825075 | 1.537218  | -0.000394 |
| Cl | -2.547007 | -0.940468 | -0.000674 |
| Cl | 2.792969  | -0.660756 | 0.000298  |

-----  
Statistical Thermodynamic AnalysisTemperature= 298.150 Kelvin Pressure= 1.00000 Atm  
=====

SCF Energy= -1488.22978446 Predicted Change= -2.616958D-07

Zero-point correction (ZPE)= -1488.1935 0.03627

Internal Energy (U)= -1488.1873 0.04246

Enthalpy (H)= -1488.1863 0.04341

Gibbs Free Energy (G)= -1488.2252 0.00454  
-----

Frequencies -- 169.7593 197.6051 243.7779

Supporting Information: **25dichlorothiazole.out**

-----  
 Using Gaussian 03: IA32L-G03RevC.02 12-Jun-2004  
 =====

# opt freq ub31yp/6-31g(d)  
 #N Geom=AllCheck Guess=Read SCRF=Check GenChk UB3LYP/6-31G(d) Freq  
 -----

Pointgroup= C1 Stoichiometry= C3HCl2NS C1[X(C3HCl2NS)] #Atoms= 8  
 Charge = 0 Multiplicity = 1  
 -----

SCF Energy= -1488.22573899 Predicted Change= -1.103799D-07  
 =====

Optimization completed. {Found 2 times}  
 Item Max Val. Criteria Pass? RMS Val. Criteria Pass?  
 Force 0.00005 || 0.00045 [ YES ] 0.00002 || 0.00030 [ YES ]  
 Displ 0.00107 || 0.00180 [ YES ] 0.00107 || 0.00180 [ YES ]  
 -----

Atomic Coordinates (Angstroms)  
 Type X Y Z  
 -----

|    |           |           |           |
|----|-----------|-----------|-----------|
| C  | -1.215729 | 0.183970  | 0.000207  |
| C  | -0.633985 | 1.417870  | 0.000111  |
| C  | 1.201665  | 0.215968  | 0.000661  |
| H  | -1.172662 | 2.357370  | -0.000226 |
| N  | 0.743329  | 1.422266  | -0.000069 |
| S  | 0.005684  | -1.069939 | 0.000121  |
| Cl | 2.886985  | -0.173369 | -0.000237 |
| Cl | -2.900708 | -0.185517 | -0.000180 |

## Statistical Thermodynamic Analysis

Temperature= 298.150 Kelvin Pressure= 1.00000 Atm  
 =====

SCF Energy= -1488.22573899 Predicted Change= -1.103799D-07  
 Zero-point correction (ZPE)= -1488.1892 0.03648  
 Internal Energy (U)= -1488.1829 0.04274  
 Enthalpy (H)= -1488.1820 0.04368  
 Gibbs Free Energy (G)= -1488.2210 0.00470  
 -----

Frequencies -- 115.0769 194.3316 300.1956

Supporting Information: **2chloro4radicalthiazole.out**

-----  
 Using Gaussian 03: IA32L-G03RevC.02 12-Jun-2004  
 =====

# opt freq ub3lyp/6-31g(d)

#N Geom=AllCheck Guess=Read SCRF=Check GenChk UB3LYP/6-31G(d) Freq

-----  
 Pointgroup= C1 Stoichiometry= C3HCINS(2) C1[X(C3HCINS)] #Atoms= 7

Charge = 0 Multiplicity = 2

-----  
 SCF Energy= -1027.94763691 Predicted Change= -9.103943D-08  
 =====

Optimization completed. {Found 2 times}

Item Max Val. Criteria Pass? RMS Val. Criteria Pass?

Force 0.00012 || 0.00045 [ YES ] 0.00004 || 0.00030 [ YES ]

Displ 0.00100 || 0.00180 [ YES ] 0.00100 || 0.00180 [ YES ]  
 -----

| Atomic<br>Type | Coordinates (Angstroms) |   |   |
|----------------|-------------------------|---|---|
|                | X                       | Y | Z |

|    |           |           |           |
|----|-----------|-----------|-----------|
| C  | 2.066380  | 0.025188  | 0.000446  |
| C  | 1.512790  | 1.257855  | 0.000041  |
| C  | -0.373279 | 0.229367  | -0.000491 |
| H  | 3.097523  | -0.295213 | 0.000886  |
| N  | 0.182462  | 1.406939  | -0.000244 |
| S  | 0.735140  | -1.128822 | -0.000170 |
| Cl | -2.080726 | -0.033334 | 0.000210  |

-----  
 Statistical Thermodynamic Analysis

Temperature= 298.150 Kelvin Pressure= 1.00000 Atm  
 =====

SCF Energy= -1027.94763691 Predicted Change= -9.103943D-08

Zero-point correction (ZPE)= -1027.9145 0.03311

Internal Energy (U)= -1027.9095 0.03812

Enthalpy (H)= -1027.9085 0.03906

Gibbs Free Energy (G)= -1027.9446 0.00301  
 -----

Frequencies -- 219.7998 274.8980 447.5167

Supporting Information: **2chloro5radicalthiazole.out**

-----  
 Using Gaussian 03: IA32L-G03RevC.02 12-Jun-2004  
 =====

# opt freq ub3lyp/6-31g(d)

#N Geom=AllCheck Guess=Read SCRF=Check GenChk UB3LYP/6-31G(d) Freq

-----  
 Pointgroup= C1 Stoichiometry= C3HCINS(2) C1[X(C3HCINS)] #Atoms= 7

Charge = 0 Multiplicity = 2

-----  
 SCF Energy= -1027.94110291 Predicted Change= -1.248741D-07  
 =====

Optimization completed. {Found 2 times}

Item Max Val. Criteria Pass? RMS Val. Criteria Pass?

Force 0.00008 || 0.00045 [ YES ] 0.00004 || 0.00030 [ YES ]

Displ 0.00058 || 0.00180 [ YES ] 0.00058 || 0.00180 [ YES ]

-----  
 Atomic Coordinates (Angstroms)  
 Type X Y Z

|    |           |           |           |
|----|-----------|-----------|-----------|
| C  | 2.016843  | -0.172292 | -0.000108 |
| C  | 1.672994  | 1.136249  | 0.000049  |
| C  | -0.338175 | 0.207898  | -0.000083 |
| H  | 2.334968  | 1.991821  | 0.000204  |
| N  | 0.296350  | 1.334469  | 0.000140  |
| S  | 0.659576  | -1.244301 | -0.000145 |
| Cl | -2.063095 | 0.090858  | 0.000116  |

-----  
 Statistical Thermodynamic Analysis

Temperature= 298.150 Kelvin Pressure= 1.00000 Atm

-----  
 SCF Energy= -1027.94110291 Predicted Change= -1.248741D-07

Zero-point correction (ZPE)= -1027.9077 0.03332

Internal Energy (U)= -1027.9027 0.03834

Enthalpy (H)= -1027.9018 0.03928

Gibbs Free Energy (G)= -1027.9379 0.00318

-----  
 Frequencies -- 221.0159 271.8591 445.6717

Supporting Information: **2chlorothiazole.out**

-----  
 Using Gaussian 03: IA32L-G03RevC.02 12-Jun-2004  
 =====

# opt=(modredundant) freq b3lyp/6-31g(d) geom=connectivity  
 #N Geom=AllCheck Guess=Read SCRF=Check GenChk RB3LYP/6-31G(d) Freq  
 -----

Pointgroup= C1 Stoichiometry= C3H2CINS C1[X(C3H2CINS)] #Atoms= 8  
 Charge = 0 Multiplicity = 1  
 -----

SCF Energy= -1028.63821212 Predicted Change= -4.216898D-07  
 =====

Optimization completed. {Found 2 times}  
 Item Max Val. Criteria Pass? RMS Val. Criteria Pass?  
 Force 0.00017 || 0.00045 [ YES ] 0.00005 || 0.00030 [ YES ]  
 Displ 0.00168 || 0.00180 [ YES ] 0.00168 || 0.00180 [ YES ]  
 -----

Atomic Coordinates (Angstroms)  
 Type X Y Z  
 -----

|    |           |           |           |
|----|-----------|-----------|-----------|
| C  | -2.003385 | -0.133916 | -0.000119 |
| C  | -1.578557 | 1.161752  | 0.000575  |
| C  | 0.394865  | 0.217482  | 0.000033  |
| H  | -3.015037 | -0.515629 | -0.000195 |
| H  | -2.227498 | 2.029695  | 0.000831  |
| N  | -0.212990 | 1.356642  | -0.000698 |
| S  | -0.634120 | -1.203926 | -0.000031 |
| Cl | 2.117756  | 0.045903  | 0.000107  |

-----

## Statistical Thermodynamic Analysis

Temperature= 298.150 Kelvin Pressure= 1.00000 Atm  
 =====

SCF Energy= -1028.63821212 Predicted Change= -4.216898D-07  
 Zero-point correction (ZPE)= -1028.5923 0.04590  
 Internal Energy (U)= -1028.5872 0.05092  
 Enthalpy (H)= -1028.5863 0.05186  
 Gibbs Free Energy (G)= -1028.6217 0.01641  
 -----

Frequencies -- 220.3698 274.8625 446.6289



Supporting Information: **4chloro2radicalthiazole.out**

-----  
 Using Gaussian 03: IA32L-G03RevC.02 12-Jun-2004  
 =====

# opt freq ub3lyp/6-31g(d)

#N Geom=AllCheck Guess=Read SCRF=Check GenChk UB3LYP/6-31G(d) Freq

-----  
 Pointgroup= C1 Stoichiometry= C3HCINS(2) C1[X(C3HCINS)] #Atoms= 7

Charge = 0 Multiplicity = 2

-----  
 SCF Energy= -1027.95234815 Predicted Change= -3.959396D-08  
 =====

Optimization completed. {Found 2 times}

Item Max Val. Criteria Pass? RMS Val. Criteria Pass?

Force 0.00008 || 0.00045 [ YES ] 0.00002 || 0.00030 [ YES ]

Displ 0.00023 || 0.00180 [ YES ] 0.00023 || 0.00180 [ YES ]

-----  
 Atomic Coordinates (Angstroms)  
 Type X Y Z

|    |           |           |           |
|----|-----------|-----------|-----------|
| C  | 0.337604  | -1.012113 | 0.000121  |
| C  | -0.538511 | 0.032124  | 0.000127  |
| C  | 1.288462  | 1.215210  | 0.000082  |
| H  | 0.122483  | -2.071109 | 0.000079  |
| N  | 0.030090  | 1.295720  | -0.000028 |
| S  | 1.977069  | -0.387595 | -0.000069 |
| Cl | -2.264209 | -0.129926 | -0.000044 |

-----  
 Statistical Thermodynamic Analysis

Temperature= 298.150 Kelvin Pressure= 1.00000 Atm

-----  
 SCF Energy= -1027.95234815 Predicted Change= -3.959396D-08

Zero-point correction (ZPE)= -1027.9191 0.03317

Internal Energy (U)= -1027.9141 0.03821

Enthalpy (H)= -1027.9131 0.03916

Gibbs Free Energy (G)= -1027.9493 0.00303

-----  
 Frequencies -- 208.0239 300.0381 431.8788

Supporting Information: **4chlorothiazole.out**

-----  
 Using Gaussian 03: IA32L-G03RevC.02 12-Jun-2004  
 =====

# opt=(modredundant) freq b3lyp/6-31g(d) geom=connectivity  
 #N Geom=AllCheck Guess=Read SCRF=Check GenChk RB3LYP/6-31G(d) Freq  
 -----

Pointgroup= C1 Stoichiometry= C3H2CINS C1[X(C3H2CINS)] #Atoms= 8  
 Charge = 0 Multiplicity = 1  
 -----

SCF Energy= -1028.63971176 Predicted Change= -1.818143D-07  
 =====

Optimization completed. {Found 2 times}  
 Item Max Val. Criteria Pass? RMS Val. Criteria Pass?  
 Force 0.00010 || 0.00045 [ YES ] 0.00004 || 0.00030 [ YES ]  
 Displ 0.00123 || 0.00180 [ YES ] 0.00123 || 0.00180 [ YES ]  
 -----

Atomic Coordinates (Angstroms)  
 Type X Y Z  
 -----

|    |           |           |           |
|----|-----------|-----------|-----------|
| C  | 0.278830  | -1.052099 | -0.000057 |
| C  | -0.559512 | 0.026133  | 0.000084  |
| C  | 1.313131  | 1.148237  | 0.000140  |
| H  | 0.028061  | -2.102285 | -0.000141 |
| N  | 0.017494  | 1.266539  | -0.000078 |
| S  | 1.917003  | -0.490270 | 0.000018  |
| H  | 1.993991  | 1.991107  | 0.000209  |
| Cl | -2.294779 | -0.096700 | -0.000047 |

-----

## Statistical Thermodynamic Analysis

Temperature= 298.150 Kelvin Pressure= 1.00000 Atm  
 =====

SCF Energy= -1028.63971176 Predicted Change= -1.818143D-07  
 Zero-point correction (ZPE)= -1028.5938 0.04585  
 Internal Energy (U)= -1028.5888 0.05085  
 Enthalpy (H)= -1028.5879 0.05179  
 Gibbs Free Energy (G)= -1028.6233 0.01636  
 -----

Frequencies -- 209.4030 300.6549 436.1574

Supporting Information: **5chloro2radicalthiazole.out**

-----  
 Using Gaussian 03: IA32L-G03RevC.02 12-Jun-2004  
 =====

# opt freq ub3lyp/6-31g(d)

#N Geom=AllCheck Guess=Read SCRF=Check GenChk UB3LYP/6-31G(d) Freq

-----  
 Pointgroup= C1 Stoichiometry= C3HCINS(2) C1[X(C3HCINS)] #Atoms= 7

Charge = 0 Multiplicity = 2

-----  
 SCF Energy= -1027.94988919 Predicted Change= -7.312812D-07  
 =====

Optimization completed. {Found 2 times}

Item Max Val. Criteria Pass? RMS Val. Criteria Pass?

Force 0.00030 || 0.00045 [ YES ] 0.00010 || 0.00030 [ YES ]

Displ 0.00169 || 0.00180 [ YES ] 0.00169 || 0.00180 [ YES ]

-----  
 Atomic Coordinates (Angstroms)  
 Type X Y Z

|    |           |           |           |
|----|-----------|-----------|-----------|
| C  | 0.368060  | 0.190951  | -0.000008 |
| C  | -0.359952 | 1.343821  | 0.000864  |
| C  | -2.034790 | -0.093466 | -0.000903 |
| H  | 0.039483  | 2.349671  | 0.001249  |
| N  | -1.733869 | 1.127854  | -0.000362 |
| S  | -0.699368 | -1.219448 | 0.000378  |
| Cl | 2.085152  | 0.036394  | -0.000264 |

-----  
 Statistical Thermodynamic Analysis

Temperature= 298.150 Kelvin Pressure= 1.00000 Atm

-----  
 SCF Energy= -1027.94988919 Predicted Change= -7.312812D-07

Zero-point correction (ZPE)= -1027.9165 0.03335

Internal Energy (U)= -1027.9114 0.03844

Enthalpy (H)= -1027.9105 0.03938

Gibbs Free Energy (G)= -1027.9467 0.00315

-----  
 Frequencies -- 226.6147 254.4622 432.6655

Supporting Information: **Schlorothiazole.out**

-----  
 Using Gaussian 03: IA32L-G03RevC.02 12-Jun-2004  
 =====

# opt=(modredundant) freq b3lyp/6-31g(d) geom=connectivity  
 #N Geom=AllCheck Guess=Read SCRF=Check GenChk RB3LYP/6-31G(d) Freq  
 -----

Pointgroup= C1 Stoichiometry= C3H2CINS C1[X(C3H2CINS)] #Atoms= 8  
 Charge = 0 Multiplicity = 1  
 -----

SCF Energy= -1028.63473024 Predicted Change= -3.732534D-07  
 =====

Optimization completed. {Found 2 times}  
 Item Max Val. Criteria Pass? RMS Val. Criteria Pass?  
 Force 0.00020 || 0.00045 [ YES ] 0.00005 || 0.00030 [ YES ]  
 Displ 0.00093 || 0.00180 [ YES ] 0.00093 || 0.00180 [ YES ]  
 -----

Atomic Coordinates (Angstroms)  
 Type X Y Z  
 -----

|    |           |           |           |
|----|-----------|-----------|-----------|
| C  | 0.415043  | 0.184300  | 0.000041  |
| C  | -0.310384 | 1.342023  | 0.000243  |
| C  | -1.992840 | -0.081807 | -0.000010 |
| H  | 0.117174  | 2.337449  | 0.000262  |
| N  | -1.675161 | 1.178721  | -0.000547 |
| S  | -0.646130 | -1.199916 | 0.000021  |
| H  | -3.011700 | -0.452126 | -0.000021 |
| Cl | 2.134577  | 0.023247  | 0.000094  |

-----

## Statistical Thermodynamic Analysis

Temperature= 298.150 Kelvin Pressure= 1.00000 Atm  
 =====

SCF Energy= -1028.63473024 Predicted Change= -3.732534D-07  
 Zero-point correction (ZPE)= -1028.5886 0.04604  
 Internal Energy (U)= -1028.5836 0.05107  
 Enthalpy (H)= -1028.5827 0.05201  
 Gibbs Free Energy (G)= -1028.6182 0.01648  
 -----

Frequencies -- 220.3342 258.0032 437.1581

**Chlorothiophenes**Supporting Information: **23dichlorothiophene\_b3lyp.out**-----  
Using Gaussian 03: IA32L-G03RevC.02 12-Jun-2004  
=====# opt=(modredundant) freq b3lyp/6-31g(d) geom=connectivity  
#N Geom=AllCheck Guess=Read SCRF=Check GenChk RB3LYP/6-31G(d) Freq  
-----Pointgroup= C1 Stoichiometry= C4H2Cl2S C1[X(C4H2Cl2S)] #Atoms= 9  
Charge = 0 Multiplicity = 1  
-----SCF Energy= -1472.18319699 Predicted Change= -7.307955D-08  
=====Optimization completed. {Found 2 times}  
Item Max Val. Criteria Pass? RMS Val. Criteria Pass?  
Force 0.00003 || 0.00045 [ YES ] 0.00001 || 0.00030 [ YES ]  
Displ 0.00114 || 0.00180 [ YES ] 0.00114 || 0.00180 [ YES ]  
-----Atomic Coordinates (Angstroms)  
Type X Y Z  
-----

|    |           |           |           |
|----|-----------|-----------|-----------|
| C  | 1.719404  | -1.470785 | 0.000265  |
| C  | 0.401623  | -1.820816 | -0.000070 |
| C  | -0.464033 | -0.682686 | -0.000049 |
| C  | 0.214910  | 0.507576  | 0.000133  |
| S  | 1.940205  | 0.252678  | -0.000499 |
| H  | 2.582938  | -2.121980 | 0.000497  |
| H  | 0.035894  | -2.840424 | -0.000058 |
| Cl | -0.445470 | 2.098550  | 0.000351  |
| Cl | -2.195326 | -0.820913 | -0.000006 |

-----  
Statistical Thermodynamic AnalysisTemperature= 298.150 Kelvin Pressure= 1.00000 Atm  
=====SCF Energy= -1472.18319699 Predicted Change= -7.307955D-08  
Zero-point correction (ZPE)= -1472.1350 0.04815  
Internal Energy (U)= -1472.1286 0.05457  
Enthalpy (H)= -1472.1276 0.05551  
Gibbs Free Energy (G)= -1472.1668 0.01630  
-----

Frequencies -- 158.6518 173.3928 239.1483

Supporting Information: **24dichlorothiophene\_b3lyp.out**

-----  
 Using Gaussian 03: IA32L-G03RevC.02 12-Jun-2004  
 =====

# opt=(modredundant) freq b3lyp/6-31g(d) geom=connectivity  
 #N Geom=AllCheck Guess=Read SCRF=Check GenChk RB3LYP/6-31G(d) Freq  
 -----

Pointgroup= C1 Stoichiometry= C4H2Cl2S C1[X(C4H2Cl2S)] #Atoms= 9  
 Charge = 0 Multiplicity = 1  
 -----

SCF Energy= -1472.18466886 Predicted Change= -7.559630D-08  
 =====

Optimization completed. {Found 2 times}  
 Item Max Val. Criteria Pass? RMS Val. Criteria Pass?  
 Force 0.00003 || 0.00045 [ YES ] 0.00001 || 0.00030 [ YES ]  
 Displ 0.00122 || 0.00180 [ YES ] 0.00122 || 0.00180 [ YES ]  
 -----

Atomic Coordinates (Angstroms)  
 Type X Y Z  
 -----

|    |           |           |           |
|----|-----------|-----------|-----------|
| C  | 0.916765  | 1.297391  | 0.000534  |
| C  | 1.239242  | -0.028397 | -0.000017 |
| C  | 0.115810  | -0.912051 | -0.000284 |
| C  | -1.055272 | -0.211141 | 0.000059  |
| S  | -0.807329 | 1.515222  | -0.000276 |
| H  | 1.582576  | 2.148501  | 0.000951  |
| H  | 0.186398  | -1.991904 | -0.000487 |
| Cl | -2.655287 | -0.868492 | 0.000144  |
| Cl | 2.881700  | -0.618270 | -0.000015 |

-----  
 Statistical Thermodynamic Analysis

Temperature= 298.150 Kelvin Pressure= 1.00000 Atm  
 =====

SCF Energy= -1472.18466886 Predicted Change= -7.559630D-08  
 Zero-point correction (ZPE)= -1472.1366 0.04805  
 Internal Energy (U)= -1472.1301 0.05448  
 Enthalpy (H)= -1472.1292 0.05542  
 Gibbs Free Energy (G)= -1472.1685 0.01613  
 -----

Frequencies -- 158.9159 187.3045 244.5318

Supporting Information: **2chloro3radicalthiophene.out**

-----  
 Using Gaussian 03: IA32L-G03RevC.02 12-Jun-2004  
 =====

# opt nosymm freq ub3lyp/6-31g(d) geom=connectivity  
 #N Geom=AllCheck Guess=Read SCRF=Check GenChk UB3LYP/6-31G(d) Freq  
 -----

Pointgroup= C1 Stoichiometry= C4H2ClS(2) C1[X(C4H2ClS)] #Atoms= 8  
 Charge = 0 Multiplicity = 2  
 -----

SCF Energy= -1011.89818345 Predicted Change= -6.040665D-08  
 =====

Optimization completed. {Found 2 times}  
 Item Max Val. Criteria Pass? RMS Val. Criteria Pass?  
 Force 0.00009 || 0.00045 [ YES ] 0.00002 || 0.00030 [ YES ]  
 Displ 0.00042 || 0.00180 [ YES ] 0.00042 || 0.00180 [ YES ]  
 -----

Atomic Coordinates (Angstroms)  
 Type X Y Z  
 -----

|    |           |           |          |
|----|-----------|-----------|----------|
| C  | 1.716205  | -1.476195 | 0.000120 |
| C  | 0.392931  | -1.831557 | 0.000028 |
| C  | -0.423742 | -0.674143 | 0.000037 |
| C  | 0.203061  | 0.519189  | 0.000064 |
| S  | 1.946344  | 0.251141  | 0.000001 |
| H  | 2.582275  | -2.125915 | 0.000181 |
| H  | 0.031548  | -2.852687 | 0.000028 |
| Cl | -0.463151 | 2.112279  | 0.000111 |

-----

## Statistical Thermodynamic Analysis

Temperature= 298.150 Kelvin Pressure= 1.00000 Atm  
 =====

SCF Energy= -1011.89818345 Predicted Change= -6.040665D-08  
 Zero-point correction (ZPE)= -1011.8532 0.04491  
 Internal Energy (U)= -1011.8480 0.05014  
 Enthalpy (H)= -1011.8470 0.05109  
 Gibbs Free Energy (G)= -1011.8835 0.01459  
 -----

Frequencies -- 190.8973 254.3745 433.1403

Supporting Information: **2chloro4radicalthiophene.out**

-----  
 Using Gaussian 03: IA32L-G03RevC.02 12-Jun-2004  
 =====

# opt nosymm freq ub3lyp/6-31g(d) geom=connectivity  
 #N Geom=AllCheck Guess=Read SCRF=Check GenChk UB3LYP/6-31G(d) Freq  
 -----

Pointgroup= C1 Stoichiometry= C4H2ClS(2) C1[X(C4H2ClS)] #Atoms= 8  
 Charge = 0 Multiplicity = 2  
 -----

SCF Energy= -1011.90065516 Predicted Change= -6.085573D-08  
 =====

Optimization completed. {Found 2 times}  
 Item Max Val. Criteria Pass? RMS Val. Criteria Pass?  
 Force 0.00009 || 0.00045 [ YES ] 0.00002 || 0.00030 [ YES ]  
 Displ 0.00033 || 0.00180 [ YES ] 0.00033 || 0.00180 [ YES ]  
 -----

Atomic Coordinates (Angstroms)  
 Type X Y Z  
 -----

|    |           |           |           |
|----|-----------|-----------|-----------|
| C  | 0.940041  | 1.302689  | 0.000413  |
| C  | 1.206607  | -0.016604 | 0.000085  |
| C  | 0.120706  | -0.925790 | -0.000177 |
| C  | -1.051954 | -0.216621 | -0.000011 |
| S  | -0.811059 | 1.514483  | 0.000258  |
| H  | 1.591735  | 2.164816  | 0.000635  |
| H  | 0.184917  | -2.006139 | -0.000412 |
| Cl | -2.658090 | -0.867707 | -0.000166 |

-----

## Statistical Thermodynamic Analysis

Temperature= 298.150 Kelvin Pressure= 1.00000 Atm  
 =====

SCF Energy= -1011.90065516 Predicted Change= -6.085573D-08  
 Zero-point correction (ZPE)= -1011.8559 0.04472  
 Internal Energy (U)= -1011.8506 0.04996  
 Enthalpy (H)= -1011.8497 0.05090  
 Gibbs Free Energy (G)= -1011.8862 0.01444  
 -----

Frequencies -- 207.4297 260.6375 430.1588



Supporting Information: **2chlorothiophene.out**

-----  
 Using Gaussian 03: IA32L-G03RevC.02 12-Jun-2004  
 =====

# opt=(modredundant) freq b3lyp/6-31g(d) geom=connectivity  
 #N Geom=AllCheck Guess=Read SCRF=Check GenChk RB3LYP/6-31G(d) Freq  
 -----

Pointgroup= C1 Stoichiometry= C4H3ClS C1[X(C4H3ClS)] #Atoms= 9  
 Charge = 0 Multiplicity = 1  
 -----

SCF Energy= -1012.59220856 Predicted Change= -2.025279D-07  
 =====

Optimization completed. {Found 2 times}  
 Item Max Val. Criteria Pass? RMS Val. Criteria Pass?  
 Force 0.00011 || 0.00045 [ YES ] 0.00004 || 0.00030 [ YES ]  
 Displ 0.00151 || 0.00180 [ YES ] 0.00151 || 0.00180 [ YES ]  
 -----

Atomic Coordinates (Angstroms)  
 Type X Y Z  
 -----

|    |           |           |           |
|----|-----------|-----------|-----------|
| C  | -2.021288 | -0.204049 | 0.000078  |
| C  | -1.703945 | 1.124893  | -0.000043 |
| C  | -0.295489 | 1.367784  | 0.000002  |
| C  | 0.421625  | 0.204668  | 0.000013  |
| S  | -0.601420 | -1.207547 | -0.000032 |
| H  | -3.001259 | -0.662113 | 0.000125  |
| H  | -2.447065 | 1.914896  | -0.000077 |
| H  | 0.162997  | 2.349556  | -0.000017 |
| Cl | 2.147213  | 0.044626  | 0.000010  |

-----

## Statistical Thermodynamic Analysis

Temperature= 298.150 Kelvin Pressure= 1.00000 Atm  
 =====

SCF Energy= -1012.59220856 Predicted Change= -2.025279D-07  
 Zero-point correction (ZPE)= -1012.5346 0.05756  
 Internal Energy (U)= -1012.5294 0.06277  
 Enthalpy (H)= -1012.5284 0.06372  
 Gibbs Free Energy (G)= -1012.5642 0.02792  
 -----

Frequencies -- 210.0651 260.3533 434.7620

Supporting Information: **3chloro2radicalthiophene.out**

-----  
 Using Gaussian 03: IA32L-G03RevC.02 12-Jun-2004  
 =====

# opt nosymm freq ub3lyp/6-31g(d) geom=connectivity  
 #N Geom=AllCheck Guess=Read SCRF=Check GenChk UB3LYP/6-31G(d) Freq  
 -----

Pointgroup= C1 Stoichiometry= C4H2ClS(2) C1[X(C4H2ClS)] #Atoms= 8  
 Charge = 0 Multiplicity = 2  
 -----

SCF Energy= -1011.89698950 Predicted Change= -4.316640D-08  
 =====

Optimization completed. {Found 2 times}  
 Item Max Val. Criteria Pass? RMS Val. Criteria Pass?  
 Force 0.00005 || 0.00045 [ YES ] 0.00002 || 0.00030 [ YES ]  
 Displ 0.00034 || 0.00180 [ YES ] 0.00034 || 0.00180 [ YES ]  
 -----

Atomic Coordinates (Angstroms)  
 Type X Y Z  
 -----

|    |           |           |           |
|----|-----------|-----------|-----------|
| C  | 1.720573  | -1.469734 | -0.000001 |
| C  | 0.402001  | -1.822591 | 0.000186  |
| C  | -0.474931 | -0.681223 | -0.000062 |
| C  | 0.233394  | 0.473334  | -0.000192 |
| S  | 1.937639  | 0.269593  | 0.000124  |
| H  | 2.587734  | -2.117050 | 0.000029  |
| H  | 0.040576  | -2.844737 | 0.000327  |
| Cl | -2.211371 | -0.804942 | -0.000196 |

-----

## Statistical Thermodynamic Analysis

Temperature= 298.150 Kelvin Pressure= 1.00000 Atm  
 =====

SCF Energy= -1011.89698950 Predicted Change= -4.316640D-08  
 Zero-point correction (ZPE)= -1011.8521 0.04481  
 Internal Energy (U)= -1011.8468 0.05010  
 Enthalpy (H)= -1011.8459 0.05105  
 Gibbs Free Energy (G)= -1011.8826 0.01437  
 -----

Frequencies -- 162.0594 275.3256 402.1379

Supporting Information: **3chlorothiophene.out**

-----  
 Using Gaussian 03: IA32L-G03RevC.02 12-Jun-2004  
 =====

# opt=(modredundant) freq b3lyp/6-31g(d) geom=connectivity  
 #N Geom=AllCheck Guess=Read SCRF=Check GenChk RB3LYP/6-31G(d) Freq  
 -----

Pointgroup= C1 Stoichiometry= C4H3ClS C1[X(C4H3ClS)] #Atoms= 9  
 Charge = 0 Multiplicity = 1  
 -----

SCF Energy= -1012.59614893 Predicted Change= -1.422255D-07  
 =====

Optimization completed. {Found 2 times}  
 Item Max Val. Criteria Pass? RMS Val. Criteria Pass?  
 Force 0.00009 || 0.00045 [ YES ] 0.00003 || 0.00030 [ YES ]  
 Displ 0.00140 || 0.00180 [ YES ] 0.00140 || 0.00180 [ YES ]  
 -----

Atomic Coordinates (Angstroms)  
 Type X Y Z  
 -----

|    |           |           |           |
|----|-----------|-----------|-----------|
| C  | -1.444962 | 1.136062  | 0.000169  |
| C  | -0.088121 | 1.287865  | -0.000107 |
| C  | 0.583567  | 0.026563  | 0.000056  |
| C  | -0.253939 | -1.052363 | 0.000109  |
| S  | -1.909540 | -0.536785 | -0.000082 |
| H  | -2.202276 | 1.908238  | 0.000237  |
| H  | 0.425058  | 2.241814  | -0.000223 |
| H  | 0.006960  | -2.100757 | 0.000152  |
| Cl | 2.326096  | -0.108794 | -0.000013 |

-----

## Statistical Thermodynamic Analysis

Temperature= 298.150 Kelvin Pressure= 1.00000 Atm  
 =====

SCF Energy= -1012.59614893 Predicted Change= -1.422255D-07  
 Zero-point correction (ZPE)= -1012.5386 0.05752  
 Internal Energy (U)= -1012.5334 0.06272  
 Enthalpy (H)= -1012.5324 0.06366  
 Gibbs Free Energy (G)= -1012.5682 0.02789  
 -----

Frequencies -- 210.5948 284.1954 423.3276

Supporting Information: **4chloro2radicalthiophene.out**

-----  
 Using Gaussian 03: IA32L-G03RevC.02 12-Jun-2004  
 =====

# opt nosymm freq ub3lyp/6-31g(d) geom=connectivity  
 #N Geom=AllCheck Guess=Read SCRF=Check GenChk UB3LYP/6-31G(d) Freq  
 -----

Pointgroup= C1 Stoichiometry= C4H2ClS(2) C1[X(C4H2ClS)] #Atoms= 8  
 Charge = 0 Multiplicity = 2  
 -----

SCF Energy= -1011.89983426 Predicted Change= -2.666655D-08  
 =====

Optimization completed. {Found 2 times}  
 Item Max Val. Criteria Pass? RMS Val. Criteria Pass?  
 Force 0.00003 || 0.00045 [ YES ] 0.00001 || 0.00030 [ YES ]  
 Displ 0.00034 || 0.00180 [ YES ] 0.00034 || 0.00180 [ YES ]  
 -----

Atomic Coordinates (Angstroms)  
 Type X Y Z  
 -----

|    |           |           |           |
|----|-----------|-----------|-----------|
| C  | 0.916683  | 1.298550  | 0.000306  |
| C  | 1.235922  | -0.028863 | 0.000146  |
| C  | 0.107507  | -0.925927 | -0.000297 |
| C  | -1.027218 | -0.189861 | -0.000300 |
| S  | -0.821405 | 1.515647  | 0.000384  |
| H  | 1.583156  | 2.149773  | 0.000565  |
| H  | 0.183901  | -2.005541 | -0.000602 |
| Cl | 2.881344  | -0.614427 | 0.000263  |

-----

## Statistical Thermodynamic Analysis

Temperature= 298.150 Kelvin Pressure= 1.00000 Atm  
 =====

SCF Energy= -1011.89983426 Predicted Change= -2.666655D-08  
 Zero-point correction (ZPE)= -1011.8551 0.04472  
 Internal Energy (U)= -1011.8498 0.04998  
 Enthalpy (H)= -1011.8489 0.05092  
 Gibbs Free Energy (G)= -1011.8854 0.01440  
 -----

Frequencies -- 202.2110 285.1718 360.2532

**Chloropyrazines**Supporting Information: **2chloropyrazine.out**-----  
Using Gaussian 03: IA32L-G03RevC.02 12-Jun-2004  
=====# opt=(modredundant) freq b3lyp/6-31g(d) geom=connectivity  
#N Geom=AllCheck Guess=Read SCRF=Check GenChk RB3LYP/6-31G(d) Freq  
-----Pointgroup= C1 Stoichiometry= C4H3ClN2 C1[X(C4H3ClN2)] #Atoms= 10  
Charge = 0 Multiplicity = 1  
-----SCF Energy= -723.913976004 Predicted Change= -1.937329D-07  
=====Optimization completed. {Found 2 times}  
Item Max Val. Criteria Pass? RMS Val. Criteria Pass?  
Force 0.00013 || 0.00045 [ YES ] 0.00004 || 0.00030 [ YES ]  
Displ 0.00039 || 0.00180 [ YES ] 0.00039 || 0.00180 [ YES ]  
-----Atomic Coordinates (Angstroms)  
Type X Y Z  
-----

|    |           |           |           |
|----|-----------|-----------|-----------|
| C  | -0.459147 | -0.031645 | 0.000021  |
| C  | 0.228850  | 1.190478  | -0.000010 |
| N  | 1.560564  | 1.220515  | 0.000011  |
| C  | 2.191359  | 0.038300  | 0.000048  |
| C  | 1.490087  | -1.166027 | 0.000054  |
| N  | 0.150021  | -1.202059 | 0.000042  |
| H  | -0.304781 | 2.137035  | -0.000062 |
| H  | 3.278446  | 0.056386  | 0.000081  |
| H  | 2.005360  | -2.123675 | 0.000098  |
| Cl | -2.215295 | -0.022681 | -0.000068 |

-----  
Statistical Thermodynamic AnalysisTemperature= 298.150 Kelvin Pressure= 1.00000 Atm  
=====SCF Energy= -723.913976004 Predicted Change= -1.937329D-07  
Zero-point correction (ZPE)= -723.8466 0.06733  
Internal Energy (U)= -723.8413 0.07259  
Enthalpy (H)= -723.8404 0.07353  
Gibbs Free Energy (G)= -723.8763 0.03764  
-----

Frequencies -- 171.8395 306.4918 423.2547

Supporting Information: **2radicapyrazine.out**

-----  
 Using Gaussian 03: IA32L-G03RevC.02 12-Jun-2004  
 =====

# opt nosymm freq ub3lyp/6-31g(d) geom=connectivity  
 #N Geom=AllCheck Guess=Read SCRF=Check GenChk UB3LYP/6-31G(d) Freq  
 -----

Pointgroup= C1 Stoichiometry= C4H3N2(2) C1[X(C4H3N2)] #Atoms= 9  
 Charge = 0 Multiplicity = 2  
 -----

SCF Energy= -263.638180917 Predicted Change= -1.117172D-06  
 =====

Optimization completed. {Found 2 times}  
 Item Max Val. Criteria Pass? RMS Val. Criteria Pass?  
 Force 0.00043 || 0.00045 [ YES ] 0.00011 || 0.00030 [ YES ]  
 Displ 0.00119 || 0.00180 [ YES ] 0.00119 || 0.00180 [ YES ]  
 -----

Atomic Coordinates (Angstroms)  
 Type X Y Z  
 -----

|   |          |           |           |
|---|----------|-----------|-----------|
| C | 0.148842 | -0.034842 | 0.000017  |
| C | 0.813300 | 1.197809  | -0.000007 |
| N | 2.151016 | 1.211746  | 0.000027  |
| C | 2.784353 | 0.030433  | 0.000074  |
| C | 2.096687 | -1.182493 | 0.000089  |
| N | 0.749582 | -1.174917 | 0.000059  |
| H | 0.295003 | 2.151540  | -0.000028 |
| H | 3.871721 | 0.054149  | 0.000091  |
| H | 2.608050 | -2.141649 | 0.000117  |

## Statistical Thermodynamic Analysis

Temperature= 298.150 Kelvin Pressure= 1.00000 Atm  
 =====

SCF Energy= -263.638180917 Predicted Change= -1.117172D-06  
 Zero-point correction (ZPE)= -263.5740 0.06411  
 Internal Energy (U)= -263.5699 0.06827  
 Enthalpy (H)= -263.5689 0.06921  
 Gibbs Free Energy (G)= -263.6019 0.03619  
 -----

Frequencies -- 364.4719 432.8125 570.8079

**Bromopyrazines**Supporting Information: **2bromopyrazine.out**-----  
Using Gaussian 03: IA32L-G03RevC.02 12-Jun-2004  
=====# opt=(modredundant) freq b3lyp/6-31g(d) geom=connectivity  
#N Geom=AllCheck Guess=Read SCRF=Check GenChk RB3LYP/6-31G(d) Freq  
-----Pointgroup= C1 Stoichiometry= C4H3BrN2 C1[X(C4H3BrN2)] #Atoms= 10  
Charge = 0 Multiplicity = 1  
-----SCF Energy= -2835.42185695 Predicted Change= -3.618648D-07  
=====Optimization completed. {Found 2 times}  
Item Max Val. Criteria Pass? RMS Val. Criteria Pass?  
Force 0.00018 || 0.00045 [ YES ] 0.00006 || 0.00030 [ YES ]  
Displ 0.00060 || 0.00180 [ YES ] 0.00060 || 0.00180 [ YES ]  
-----Atomic Coordinates (Angstroms)  
Type X Y Z  
-----

|    |           |           |           |
|----|-----------|-----------|-----------|
| C  | 0.139061  | -0.029987 | 0.000029  |
| C  | 0.827819  | 1.191073  | 0.000006  |
| N  | 2.159868  | 1.218992  | 0.000029  |
| C  | 2.788822  | 0.035683  | 0.000067  |
| C  | 2.086208  | -1.168038 | 0.000075  |
| N  | 0.745624  | -1.199800 | 0.000057  |
| H  | 0.295604  | 2.138186  | -0.000043 |
| H  | 3.876005  | 0.052368  | 0.000099  |
| H  | 2.599542  | -2.126702 | 0.000118  |
| Br | -1.776030 | -0.010588 | -0.000052 |

-----  
Statistical Thermodynamic AnalysisTemperature= 298.150 Kelvin Pressure= 1.00000 Atm  
=====SCF Energy= -2835.42185695 Predicted Change= -3.618648D-07  
Zero-point correction (ZPE)= -2835.3550 0.06678  
Internal Energy (U)= -2835.3495 0.07226  
Enthalpy (H)= -2835.3486 0.07321  
Gibbs Free Energy (G)= -2835.3858 0.03598  
-----

Frequencies -- 158.6920 257.4560 313.4093

**Bromofurans**Supporting Information: **23dibromofuran.out**-----  
Using Gaussian 03: IA32L-G03RevC.02 12-Jun-2004

=====

# opt=(modredundant) freq b3lyp/6-31g(d) geom=connectivity

#N Geom=AllCheck Guess=Read SCRF=Check GenChk RB3LYP/6-31G(d) Freq

-----  
Pointgroup= C1 Stoichiometry= C4H2Br2O C1[X(C4H2Br2O)] #Atoms= 9

Charge = 0 Multiplicity = 1

-----  
SCF Energy= -5372.21943201 Predicted Change= -1.334220D-07

=====

Optimization completed. {Found 2 times}

Item Max Val. Criteria Pass? RMS Val. Criteria Pass?

Force 0.00006 || 0.00045 [ YES ] 0.00002 || 0.00030 [ YES ]

Displ 0.00110 || 0.00180 [ YES ] 0.00110 || 0.00180 [ YES ]

-----  
Atomic Coordinates (Angstroms)  
Type X Y Z-----  
C -0.663809 0.593880 0.000103  
C 0.696836 0.673551 -0.000124  
C 1.022578 2.068641 0.000394  
C -0.167712 2.723925 -0.000347  
H 2.012217 2.501107 0.000710  
H -0.448246 3.765523 -0.000622  
O -1.210655 1.835864 0.000007  
Br 1.891910 -0.770002 -0.000211  
Br -1.812084 -0.867527 0.000202-----  
Statistical Thermodynamic Analysis

Temperature= 298.150 Kelvin Pressure= 1.00000 Atm

=====

SCF Energy= -5372.21943201 Predicted Change= -1.334220D-07

Zero-point correction (ZPE)= -5372.1690 0.05038

Internal Energy (U)= -5372.1627 0.05672

Enthalpy (H)= -5372.1617 0.05766

Gibbs Free Energy (G)= -5372.2022 0.01719

-----  
Frequencies -- 103.2501 185.0829 239.2894



Supporting Information: **24dibromofuran.out**

-----  
 Using Gaussian 03: IA32L-G03RevC.02 12-Jun-2004  
 =====

# opt=(modredundant) freq b3lyp/6-31g(d) geom=connectivity  
 #N Geom=AllCheck Guess=Read SCRF=Check GenChk RB3LYP/6-31G(d) Freq  
 -----

Pointgroup= C1 Stoichiometry= C4H2Br2O C1[X(C4H2Br2O)] #Atoms= 9  
 Charge = 0 Multiplicity = 1  
 -----

SCF Energy= -5372.21952445 Predicted Change= -3.289675D-07  
 =====

Optimization completed. {Found 2 times}  
 Item Max Val. Criteria Pass? RMS Val. Criteria Pass?  
 Force 0.00023 || 0.00045 [ YES ] 0.00006 || 0.00030 [ YES ]  
 Displ 0.00117 || 0.00180 [ YES ] 0.00117 || 0.00180 [ YES ]  
 -----

Atomic Coordinates (Angstroms)  
 Type X Y Z  
 -----

|    |           |           |           |
|----|-----------|-----------|-----------|
| C  | -0.624683 | 1.479117  | 0.000335  |
| C  | -1.119472 | 0.212824  | 0.000168  |
| C  | -0.005699 | -0.688038 | 0.000383  |
| C  | 1.088521  | 0.120391  | -0.000062 |
| H  | -1.072831 | 2.459103  | 0.000441  |
| H  | -0.027966 | -1.766644 | 0.000555  |
| O  | 0.744431  | 1.432515  | 0.000006  |
| Br | -2.938457 | -0.269887 | 0.000230  |
| Br | 2.913124  | -0.270066 | -0.000402 |

-----

## Statistical Thermodynamic Analysis

Temperature= 298.150 Kelvin Pressure= 1.00000 Atm  
 =====

SCF Energy= -5372.21952445 Predicted Change= -3.289675D-07  
 Zero-point correction (ZPE)= -5372.1691 0.05033  
 Internal Energy (U)= -5372.1628 0.05671  
 Enthalpy (H)= -5372.1618 0.05765  
 Gibbs Free Energy (G)= -5372.2024 0.01712  
 -----

Frequencies -- 123.2061 142.2354 261.4655

Supporting Information: **2bromo3radicalfuran.out**

-----  
 Using Gaussian 03: IA32L-G03RevC.02 12-Jun-2004  
 =====

# opt nosymm freq ub3lyp/6-31g(d) geom=connectivity  
 #N Geom=AllCheck Guess=Read SCRF=Check GenChk UB3LYP/6-31G(d) Freq  
 -----

Pointgroup= C1 Stoichiometry= C4H2BrO(2) C1[X(C4H2BrO)] #Atoms= 8  
 Charge = 0 Multiplicity = 2  
 -----

SCF Energy= -2800.41902137 Predicted Change= -1.036597D-07  
 =====

Optimization completed. {Found 2 times}  
 Item Max Val. Criteria Pass? RMS Val. Criteria Pass?  
 Force 0.00010 || 0.00045 [ YES ] 0.00004 || 0.00030 [ YES ]  
 Displ 0.00055 || 0.00180 [ YES ] 0.00055 || 0.00180 [ YES ]  
 -----

Atomic Coordinates (Angstroms)  
 Type X Y Z  
 -----

|    |           |           |           |
|----|-----------|-----------|-----------|
| C  | -0.661848 | 0.599568  | 0.000089  |
| C  | 0.685264  | 0.690943  | 0.000351  |
| C  | 1.056565  | 2.064965  | 0.000154  |
| C  | -0.134092 | 2.731022  | -0.000104 |
| H  | 2.047251  | 2.495329  | 0.000269  |
| H  | -0.400234 | 3.777196  | -0.000290 |
| O  | -1.194018 | 1.861427  | -0.000350 |
| Br | -1.845316 | -0.837820 | 0.000040  |

-----

## Statistical Thermodynamic Analysis

Temperature= 298.150 Kelvin Pressure= 1.00000 Atm  
 =====

SCF Energy= -2800.41902137 Predicted Change= -1.036597D-07  
 Zero-point correction (ZPE)= -2800.3714 0.04754  
 Internal Energy (U)= -2800.3665 0.05250  
 Enthalpy (H)= -2800.3655 0.05345  
 Gibbs Free Energy (G)= -2800.4019 0.01707  
 -----

Frequencies -- 190.2037 259.2642 370.8948

Supporting Information: **2bromo4radicalfuran.out**

-----  
 Using Gaussian 03: IA32L-G03RevC.02 12-Jun-2004  
 =====

# opt nosymm freq ub3lyp/6-31g(d) geom=connectivity  
 #N Geom=AllCheck Guess=Read SCRF=Check GenChk UB3LYP/6-31G(d) Freq  
 -----

Pointgroup= C1 Stoichiometry= C4H2BrO(2) C1[X(C4H2BrO)] #Atoms= 8  
 Charge = 0 Multiplicity = 2  
 -----

SCF Energy= -2800.42115463 Predicted Change= -1.239433D-06  
 =====

Optimization completed. {Found 1 times}  
 Item Max Val. Criteria Pass? RMS Val. Criteria Pass?  
 Force 0.00034 || 0.00045 [ YES ] 0.00012 || 0.00030 [ YES ]  
 Displ 0.00186 || 0.00180 [ NO ] 0.00186 || 0.00180 [ YES ]  
 -----

Atomic Coordinates (Angstroms)  
 Type X Y Z  
 -----

|    |           |           |          |
|----|-----------|-----------|----------|
| C  | 0.636122  | 1.490713  | 0.000148 |
| C  | 1.098721  | 0.222447  | 0.000433 |
| C  | 0.012535  | -0.696092 | 0.000167 |
| C  | -1.081442 | 0.121440  | 0.000343 |
| H  | 1.071420  | 2.475930  | 0.000137 |
| H  | 0.023522  | -1.774886 | 0.000149 |
| O  | -0.746523 | 1.437408  | 0.000117 |
| Br | -2.908770 | -0.267664 | 0.000427 |

-----

## Statistical Thermodynamic Analysis

Temperature= 298.150 Kelvin Pressure= 1.00000 Atm  
 =====

SCF Energy= -2800.42115463 Predicted Change= -1.239433D-06  
 Zero-point correction (ZPE)= -2800.3735 0.04758  
 Internal Energy (U)= -2800.3686 0.05252  
 Enthalpy (H)= -2800.3676 0.05346  
 Gibbs Free Energy (G)= -2800.4040 0.01715  
 -----

Frequencies -- 207.2380 263.4971 367.4281

Supporting Information: **2bromofuran.out**

-----  
 Using Gaussian 03: IA32L-G03RevC.02 12-Jun-2004  
 =====

# opt=(modredundant) freq b3lyp/6-31g(d) geom=connectivity  
 #N Geom=AllCheck Guess=Read SCRF=Check GenChk RB3LYP/6-31G(d) Freq  
 -----

Pointgroup= C1 Stoichiometry= C4H3BrO C1[X(C4H3BrO)] #Atoms= 9  
 Charge = 0 Multiplicity = 1  
 -----

SCF Energy= -2801.11982369 Predicted Change= -4.596367D-07  
 =====

Optimization completed. {Found 2 times}  
 Item Max Val. Criteria Pass? RMS Val. Criteria Pass?  
 Force 0.00011 || 0.00045 [ YES ] 0.00004 || 0.00030 [ YES ]  
 Displ 0.00172 || 0.00180 [ YES ] 0.00172 || 0.00180 [ YES ]  
 -----

Atomic Coordinates (Angstroms)  
 Type X Y Z  
 -----

|    |           |           |           |
|----|-----------|-----------|-----------|
| C  | -0.333903 | 0.104841  | -0.000124 |
| C  | -1.177545 | 1.172441  | 0.000378  |
| C  | -2.498851 | 0.611998  | -0.000575 |
| C  | -2.344626 | -0.739111 | 0.000644  |
| H  | -0.895404 | 2.214642  | 0.000752  |
| H  | -3.434698 | 1.153329  | -0.000895 |
| H  | -3.026438 | -1.575091 | 0.001212  |
| O  | -1.014601 | -1.068491 | -0.000429 |
| Br | 1.531511  | -0.004170 | 0.000012  |

-----

## Statistical Thermodynamic Analysis

Temperature= 298.150 Kelvin Pressure= 1.00000 Atm  
 =====

SCF Energy= -2801.11982369 Predicted Change= -4.596367D-07  
 Zero-point correction (ZPE)= -2801.0595 0.06027  
 Internal Energy (U)= -2801.0545 0.06523  
 Enthalpy (H)= -2801.0536 0.06617  
 Gibbs Free Energy (G)= -2801.0893 0.03044  
 -----

Frequencies -- 206.1472 261.4592 366.9162

Supporting Information: **2bromofuranradical2.out**

-----  
 Using Gaussian 03: IA32L-G03RevC.02 12-Jun-2004  
 =====

# opt nosymm freq ub3lyp/6-31g(d) geom=connectivity  
 #N Geom=AllCheck Guess=Read SCRF=Check GenChk UB3LYP/6-31G(d) Freq  
 -----

Pointgroup= C1 Stoichiometry= C4H3O(2) C1[X(C4H3O)] #Atoms= 8  
 Charge = 0 Multiplicity = 2  
 -----

SCF Energy= -229.321276675 Predicted Change= -2.696304D-08  
 =====

Optimization completed. {Found 2 times}  
 Item Max Val. Criteria Pass? RMS Val. Criteria Pass?  
 Force 0.00005 || 0.00045 [ YES ] 0.00002 || 0.00030 [ YES ]  
 Displ 0.00024 || 0.00180 [ YES ] 0.00024 || 0.00180 [ YES ]  
 -----

Atomic Coordinates (Angstroms)  
 Type X Y Z  
 -----

|   |           |           |           |
|---|-----------|-----------|-----------|
| C | -0.354318 | 0.096972  | 0.000260  |
| C | -1.169591 | 1.182429  | 0.000054  |
| C | -2.496541 | 0.608979  | 0.000000  |
| C | -2.349642 | -0.742980 | 0.000222  |
| H | -0.891301 | 2.224804  | -0.000058 |
| H | -3.431811 | 1.152821  | -0.000160 |
| H | -3.028671 | -1.581062 | 0.000293  |
| O | -1.004191 | -1.067404 | 0.000352  |

-----

## Statistical Thermodynamic Analysis

Temperature= 298.150 Kelvin Pressure= 1.00000 Atm  
 =====

SCF Energy= -229.321276675 Predicted Change= -2.696304D-08  
 Zero-point correction (ZPE)= -229.2641 0.05715  
 Internal Energy (U)= -229.2603 0.06090  
 Enthalpy (H)= -229.2594 0.06184  
 Gibbs Free Energy (G)= -229.2909 0.03027  
 -----

Frequencies -- 479.9989 606.0031 703.3667

Supporting Information: **3bromo2radicalfuran.out**

-----  
 Using Gaussian 03: IA32L-G03RevC.02 12-Jun-2004  
 =====

# opt nosymm freq ub3lyp/6-31g(d) geom=connectivity  
 #N Geom=AllCheck Guess=Read SCRF=Check GenChk UB3LYP/6-31G(d) Freq  
 -----

Pointgroup= C1 Stoichiometry= C4H2BrO(2) C1[X(C4H2BrO)] #Atoms= 8  
 Charge = 0 Multiplicity = 2  
 -----

SCF Energy= -2800.41879474 Predicted Change= -1.069879D-07  
 =====

Optimization completed. {Found 2 times}  
 Item Max Val. Criteria Pass? RMS Val. Criteria Pass?  
 Force 0.00013 || 0.00045 [ YES ] 0.00004 || 0.00030 [ YES ]  
 Displ 0.00044 || 0.00180 [ YES ] 0.00044 || 0.00180 [ YES ]  
 -----

Atomic Coordinates (Angstroms)  
 Type X Y Z  
 -----

|    |           |           |           |
|----|-----------|-----------|-----------|
| C  | -0.641305 | 0.633405  | -0.000124 |
| C  | 0.715655  | 0.664397  | 0.000117  |
| C  | 1.047476  | 2.068330  | 0.000003  |
| C  | -0.132661 | 2.742347  | -0.000016 |
| H  | 2.043236  | 2.488541  | 0.000065  |
| H  | -0.407369 | 3.785375  | -0.000022 |
| O  | -1.188685 | 1.848155  | -0.000275 |
| Br | 1.913509  | -0.780373 | 0.000341  |

-----

## Statistical Thermodynamic Analysis

Temperature= 298.150 Kelvin Pressure= 1.00000 Atm  
 =====

SCF Energy= -2800.41879474 Predicted Change= -1.069879D-07  
 Zero-point correction (ZPE)= -2800.3714 0.04738  
 Internal Energy (U)= -2800.3663 0.05239  
 Enthalpy (H)= -2800.3654 0.05334  
 Gibbs Free Energy (G)= -2800.4019 0.01684  
 -----

Frequencies -- 210.9622 249.4038 362.0162

Supporting Information: **3bromofuran.out**

-----  
 Using Gaussian 03: IA32L-G03RevC.02 12-Jun-2004  
 =====

# opt=(modredundant) freq b3lyp/6-31g(d) geom=connectivity  
 #N Geom=AllCheck Guess=Read SCRF=Check GenChk RB3LYP/6-31G(d) Freq  
 -----

Pointgroup= C1 Stoichiometry= C4H3BrO C1[X(C4H3BrO)] #Atoms= 9  
 Charge = 0 Multiplicity = 1  
 -----

SCF Energy= -2801.12106801 Predicted Change= -1.567714D-07  
 =====

Optimization completed. {Found 2 times}  
 Item Max Val. Criteria Pass? RMS Val. Criteria Pass?  
 Force 0.00015 || 0.00045 [ YES ] 0.00004 || 0.00030 [ YES ]  
 Displ 0.00072 || 0.00180 [ YES ] 0.00072 || 0.00180 [ YES ]  
 -----

Atomic Coordinates (Angstroms)  
 Type X Y Z  
 -----

|    |           |           |           |
|----|-----------|-----------|-----------|
| C  | 1.117947  | -1.097076 | 0.000271  |
| C  | 0.316438  | 0.002262  | -0.000035 |
| C  | 1.170335  | 1.152320  | 0.000267  |
| C  | 2.436959  | 0.657129  | -0.000168 |
| H  | 0.925556  | -2.157851 | 0.000428  |
| H  | 0.866684  | 2.188703  | 0.000467  |
| H  | 3.413884  | 1.115719  | -0.000324 |
| O  | 2.423556  | -0.706974 | -0.000154 |
| Br | -1.566990 | 0.006326  | -0.000039 |

## Statistical Thermodynamic Analysis

Temperature= 298.150 Kelvin Pressure= 1.00000 Atm  
 =====

SCF Energy= -2801.12106801 Predicted Change= -1.567714D-07  
 Zero-point correction (ZPE)= -2801.0605 0.06049  
 Internal Energy (U)= -2801.0556 0.06544  
 Enthalpy (H)= -2801.0546 0.06639  
 Gibbs Free Energy (G)= -2801.0904 0.03063  
 -----

Frequencies -- 229.9232 248.2471 358.0740

Supporting Information: **3bromofuranradical.out**

-----  
 Using Gaussian 03: IA32L-G03RevC.02 12-Jun-2004  
 =====

# opt nosymm freq ub3lyp/6-31g(d) geom=connectivity  
 #N Geom=AllCheck Guess=Read SCRF=Check GenChk UB3LYP/6-31G(d) Freq  
 -----

Pointgroup= C1 Stoichiometry= C4H3O(2) C1[X(C4H3O)] #Atoms= 8  
 Charge = 0 Multiplicity = 2  
 -----

SCF Energy= -229.321688687 Predicted Change= -2.024997D-07  
 =====

Optimization completed. {Found 2 times}  
 Item Max Val. Criteria Pass? RMS Val. Criteria Pass?  
 Force 0.00011 || 0.00045 [ YES ] 0.00004 || 0.00030 [ YES ]  
 Displ 0.00099 || 0.00180 [ YES ] 0.00099 || 0.00180 [ YES ]  
 -----

Atomic Coordinates (Angstroms)  
 Type X Y Z  
 -----

|   |          |           |           |
|---|----------|-----------|-----------|
| C | 1.107102 | -1.106969 | 0.000338  |
| C | 0.335844 | 0.002805  | -0.000163 |
| C | 1.162586 | 1.161819  | 0.000356  |
| C | 2.430835 | 0.656887  | -0.000238 |
| H | 0.929057 | -2.169629 | 0.000312  |
| H | 0.872139 | 2.202147  | 0.000518  |
| H | 3.408586 | 1.115429  | -0.000473 |
| O | 2.425210 | -0.708258 | 0.000101  |

## Statistical Thermodynamic Analysis

Temperature= 298.150 Kelvin Pressure= 1.00000 Atm  
 =====

SCF Energy= -229.321688687 Predicted Change= -2.024997D-07  
 Zero-point correction (ZPE)= -229.2641 0.05751  
 Internal Energy (U)= -229.2604 0.06121  
 Enthalpy (H)= -229.2595 0.06216  
 Gibbs Free Energy (G)= -229.2910 0.03067  
 -----

Frequencies -- 546.0707 616.8968 695.5630



Supporting Information: **4bromo2radicalfuran.out**

-----  
 Using Gaussian 03: IA32L-G03RevC.02 12-Jun-2004  
 =====

# opt nosymm freq ub3lyp/6-31g(d) geom=connectivity  
 #N Geom=AllCheck Guess=Read SCRF=Check GenChk UB3LYP/6-31G(d) Freq  
 -----

Pointgroup= C1 Stoichiometry= C4H2BrO(2) C1[X(C4H2BrO)] #Atoms= 8  
 Charge = 0 Multiplicity = 2  
 -----

SCF Energy= -2800.42191866 Predicted Change= -1.294524D-07  
 =====

Optimization completed. {Found 2 times}  
 Item Max Val. Criteria Pass? RMS Val. Criteria Pass?  
 Force 0.00009 || 0.00045 [ YES ] 0.00004 || 0.00030 [ YES ]  
 Displ 0.00065 || 0.00180 [ YES ] 0.00065 || 0.00180 [ YES ]  
 -----

Atomic Coordinates (Angstroms)  
 Type X Y Z  
 -----

|    |           |           |           |
|----|-----------|-----------|-----------|
| C  | 0.635888  | 1.488393  | -0.000053 |
| C  | 1.124485  | 0.219303  | 0.000182  |
| C  | 0.010524  | -0.697889 | 0.000051  |
| C  | -1.060278 | 0.134800  | 0.000629  |
| H  | 1.080184  | 2.470057  | -0.000274 |
| H  | 0.037197  | -1.775497 | -0.000102 |
| O  | -0.746198 | 1.429822  | 0.000738  |
| Br | 2.944568  | -0.260949 | -0.000064 |

-----

## Statistical Thermodynamic Analysis

Temperature= 298.150 Kelvin Pressure= 1.00000 Atm  
 =====

SCF Energy= -2800.42191866 Predicted Change= -1.294524D-07  
 Zero-point correction (ZPE)= -2800.3744 0.04746  
 Internal Energy (U)= -2800.3694 0.05243  
 Enthalpy (H)= -2800.3685 0.05337  
 Gibbs Free Energy (G)= -2800.4049 0.01698  
 -----

Frequencies -- 229.9198 251.3845 358.8749

**Bromoimidazoles**Supporting Information: **24dibromoimidazole.out**-----  
Using Gaussian 03: IA32L-G03RevC.02 12-Jun-2004  
=====

# opt freq b3lyp/6-31g(d)

#N Geom=AllCheck Guess=Read SCRF=Check GenChk RB3LYP/6-31G(d) Freq

-----  
Pointgroup= C1 Stoichiometry= C3H2Br2N2 C1[X(C3H2Br2N2)] #Atoms= 9Charge = 0 Multiplicity = 1  
-----SCF Energy= -5368.41583877 Predicted Change= -3.463385D-08  
=====

Optimization completed. {Found 2 times}

Item Max Val. Criteria Pass? RMS Val. Criteria Pass?

Force 0.00004 || 0.00045 [ YES ] 0.00001 || 0.00030 [ YES ]

Displ 0.00038 || 0.00180 [ YES ] 0.00038 || 0.00180 [ YES ]  
-----Atomic Coordinates (Angstroms)  
Type X Y Z  
-----

|    |           |           |           |
|----|-----------|-----------|-----------|
| C  | 1.035598  | 0.204750  | 0.000004  |
| C  | -1.074156 | 0.282942  | 0.000008  |
| C  | -0.673646 | 1.594294  | 0.000255  |
| N  | 0.707851  | 1.527388  | 0.000105  |
| H  | 1.357892  | 2.300635  | 0.000136  |
| H  | -1.218875 | 2.524324  | 0.000388  |
| N  | -0.011276 | -0.579501 | 0.000154  |
| Br | 2.830207  | -0.346797 | -0.000071 |
| Br | -2.851402 | -0.337548 | -0.000042 |

-----  
Statistical Thermodynamic AnalysisTemperature= 298.150 Kelvin Pressure= 1.00000 Atm  
=====

SCF Energy= -5368.41583877 Predicted Change= -3.463385D-08

Zero-point correction (ZPE)= -5368.3647 0.05112

Internal Energy (U)= -5368.3583 0.05753

Enthalpy (H)= -5368.3573 0.05848

Gibbs Free Energy (G)= -5368.3979 0.01793  
-----

Frequencies -- 137.4600 141.3044 276.6536

Supporting Information: **25dibromoimidazole.out**

-----  
 Using Gaussian 03: IA32L-G03RevC.02 12-Jun-2004  
 =====

# opt freq b3lyp/6-31g(d)

#N Geom=AllCheck Guess=Read SCRF=Check GenChk RB3LYP/6-31G(d) Freq

-----  
 Pointgroup= C1 Stoichiometry= C3H2Br2N2 C1[X(C3H2Br2N2)] #Atoms= 9

Charge = 0 Multiplicity = 1  
 -----

SCF Energy= -5368.41438801 Predicted Change= -1.263072D-07  
 =====

Optimization completed. {Found 2 times}

Item Max Val. Criteria Pass? RMS Val. Criteria Pass?

Force 0.00008 || 0.00045 [ YES ] 0.00003 || 0.00030 [ YES ]

Displ 0.00090 || 0.00180 [ YES ] 0.00090 || 0.00180 [ YES ]  
 -----

Atomic Coordinates (Angstroms)

| Atomic Type | X         | Y         | Z         |
|-------------|-----------|-----------|-----------|
| C           | -1.087518 | 0.365480  | -0.000074 |
| C           | 0.622457  | 1.641543  | 0.000014  |
| C           | 1.102873  | 0.358855  | 0.000059  |
| N           | -0.004918 | -0.466035 | 0.000051  |
| H           | -0.009179 | -1.476053 | 0.000147  |
| H           | 1.182778  | 2.564955  | 0.000025  |
| N           | -0.757928 | 1.628213  | -0.000206 |
| Br          | -2.831682 | -0.332388 | -0.000177 |
| Br          | 2.841381  | -0.336738 | 0.000203  |

-----  
 Statistical Thermodynamic Analysis

Temperature= 298.150 Kelvin Pressure= 1.00000 Atm  
 =====

SCF Energy= -5368.41438801 Predicted Change= -1.263072D-07

Zero-point correction (ZPE)= -5368.3631 0.05124

Internal Energy (U)= -5368.3566 0.05769

Enthalpy (H)= -5368.3557 0.05863

Gibbs Free Energy (G)= -5368.3964 0.01796  
 -----

Frequencies -- 132.1211 133.0826 271.9169

Supporting Information: **2bromo4radicalimidazole.out**

-----  
 Using Gaussian 03: IA32L-G03RevC.02 12-Jun-2004  
 =====

#opt nosymm freq ub3lyp/6-31g(d)  
 #N Geom=AllCheck Guess=Read SCRF=Check GenChk UB3LYP/6-31G(d) Freq  
 -----

Pointgroup= C1 Stoichiometry= C3H2BrN2(2) C1[X(C3H2BrN2)] #Atoms= 8  
 Charge = 0 Multiplicity = 2  
 -----

SCF Energy= -2796.62005219 Predicted Change= -5.291923D-07  
 =====

Optimization completed. {Found 2 times}  
 Item Max Val. Criteria Pass? RMS Val. Criteria Pass?  
 Force 0.00031 || 0.00045 [ YES ] 0.00009 || 0.00030 [ YES ]  
 Displ 0.00150 || 0.00180 [ YES ] 0.00150 || 0.00180 [ YES ]  
 -----

Atomic Coordinates (Angstroms)  
 Type X Y Z  
 -----

|    |           |           |           |
|----|-----------|-----------|-----------|
| C  | 1.036125  | 0.203877  | 0.000073  |
| C  | -1.057125 | 0.278617  | 0.000325  |
| C  | -0.683960 | 1.594627  | 0.000161  |
| N  | 0.707806  | 1.526553  | 0.000177  |
| H  | 1.364268  | 2.295403  | 0.000203  |
| H  | -1.223237 | 2.527671  | 0.000241  |
| N  | -0.024403 | -0.574289 | -0.000086 |
| Br | 2.834122  | -0.344424 | -0.000116 |

-----

## Statistical Thermodynamic Analysis

Temperature= 298.150 Kelvin Pressure= 1.00000 Atm  
 =====

SCF Energy= -2796.62005219 Predicted Change= -5.291923D-07  
 Zero-point correction (ZPE)= -2796.5714 0.04855  
 Internal Energy (U)= -2796.5665 0.05354  
 Enthalpy (H)= -2796.5655 0.05448  
 Gibbs Free Energy (G)= -2796.6019 0.01814  
 -----

Frequencies -- 214.4029 271.4104 365.9792

Supporting Information: **2bromo5radicalimidazole.out**

-----  
 Using Gaussian 03: IA32L-G03RevC.02 12-Jun-2004  
 =====

#opt nosymm freq ub3lyp/6-31g(d)  
 #N Geom=AllCheck Guess=Read SCRF=Check GenChk UB3LYP/6-31G(d) Freq  
 -----

Pointgroup= C1 Stoichiometry= C3H2BrN2(2) C1[X(C3H2BrN2)] #Atoms= 8  
 Charge = 0 Multiplicity = 2  
 -----

SCF Energy= -2796.61584103 Predicted Change= -4.345425D-07  
 =====

Optimization completed. {Found 2 times}  
 Item Max Val. Criteria Pass? RMS Val. Criteria Pass?  
 Force 0.00033 || 0.00045 [ YES ] 0.00008 || 0.00030 [ YES ]  
 Displ 0.00119 || 0.00180 [ YES ] 0.00119 || 0.00180 [ YES ]  
 -----

Atomic Coordinates (Angstroms)  
 Type X Y Z  
 -----

|    |           |           |           |
|----|-----------|-----------|-----------|
| C  | -1.087378 | 0.354458  | -0.000129 |
| C  | 0.634993  | 1.650887  | -0.000035 |
| C  | 1.086271  | 0.363152  | 0.000051  |
| N  | -0.002397 | -0.475595 | 0.000087  |
| H  | -0.004261 | -1.484951 | 0.000171  |
| H  | 1.182886  | 2.579852  | -0.000037 |
| N  | -0.753300 | 1.618145  | -0.000027 |
| Br | -2.839932 | -0.321379 | -0.000243 |

-----

## Statistical Thermodynamic Analysis

Temperature= 298.150 Kelvin Pressure= 1.00000 Atm  
 =====

SCF Energy= -2796.61584103 Predicted Change= -4.345425D-07  
 Zero-point correction (ZPE)= -2796.5674 0.04840  
 Internal Energy (U)= -2796.5623 0.05347  
 Enthalpy (H)= -2796.5614 0.05441  
 Gibbs Free Energy (G)= -2796.5979 0.01791  
 -----

Frequencies -- 205.0366 267.9542 363.8735

Supporting Information: **2bromoimidazole.out**

-----  
 Using Gaussian 03: IA32L-G03RevC.02 12-Jun-2004  
 =====

# opt=(modredundant) freq b3lyp/6-31g(d) geom=connectivity  
 #N Geom=AllCheck Guess=Read SCRF=Check GenChk RB3LYP/6-31G(d) Freq  
 -----

Pointgroup= C1 Stoichiometry= C3H3BrN2 C1[X(C3H3BrN2)] #Atoms= 9  
 Charge = 0 Multiplicity = 1  
 -----

SCF Energy= -2797.31523447 Predicted Change= -1.694301D-07  
 =====

Optimization completed. {Found 2 times}  
 Item Max Val. Criteria Pass? RMS Val. Criteria Pass?  
 Force 0.00017 || 0.00045 [ YES ] 0.00004 || 0.00030 [ YES ]  
 Displ 0.00100 || 0.00180 [ YES ] 0.00100 || 0.00180 [ YES ]  
 -----

Atomic Coordinates (Angstroms)  
 Type X Y Z  
 -----

|    |           |           |           |
|----|-----------|-----------|-----------|
| C  | -0.353635 | -0.089286 | 0.000011  |
| C  | -2.384208 | -0.716250 | 0.000065  |
| C  | -2.424292 | 0.654498  | 0.000203  |
| N  | -1.100082 | 1.052591  | 0.000131  |
| H  | -0.740873 | 1.996019  | 0.000226  |
| H  | -3.213936 | -1.409292 | 0.000034  |
| H  | -3.235790 | 1.366219  | 0.000288  |
| N  | -1.080259 | -1.173083 | 0.000071  |
| Br | 1.526451  | -0.005808 | -0.000104 |

-----

## Statistical Thermodynamic Analysis

Temperature= 298.150 Kelvin Pressure= 1.00000 Atm  
 =====

SCF Energy= -2797.31523447 Predicted Change= -1.694301D-07  
 Zero-point correction (ZPE)= -2797.2540 0.06121  
 Internal Energy (U)= -2797.2489 0.06624  
 Enthalpy (H)= -2797.2480 0.06718  
 Gibbs Free Energy (G)= -2797.2838 0.03137  
 -----

Frequencies -- 212.5957 267.4274 363.8192

Supporting Information: **2bromoimidazol radical.out**

-----  
 Using Gaussian 03: IA32L-G03RevC.02 12-Jun-2004  
 =====

# opt nosymm freq ub3lyp/6-31g(d) geom=connectivity  
 #N Geom=AllCheck Guess=Read SCRF=Check GenChk UB3LYP/6-31G(d) Freq  
 -----

Pointgroup= C1 Stoichiometry= C3H3N2(2) C1[X(C3H3N2)] #Atoms= 8  
 Charge = 0 Multiplicity = 2  
 -----

SCF Energy= -225.520336906 Predicted Change= -2.362370D-07  
 =====

Optimization completed. {Found 2 times}  
 Item Max Val. Criteria Pass? RMS Val. Criteria Pass?  
 Force 0.00008 || 0.00045 [ YES ] 0.00004 || 0.00030 [ YES ]  
 Displ 0.00106 || 0.00180 [ YES ] 0.00106 || 0.00180 [ YES ]  
 -----

Atomic Coordinates (Angstroms)  
 Type X Y Z  
 -----

|   |           |           |           |
|---|-----------|-----------|-----------|
| C | -0.362375 | -0.095286 | 0.000360  |
| C | -2.391914 | -0.716611 | -0.000205 |
| C | -2.426514 | 0.652995  | 0.000552  |
| N | -1.090202 | 1.052741  | -0.000125 |
| H | -0.736531 | 1.997156  | -0.000323 |
| H | -3.217627 | -1.414345 | -0.000499 |
| H | -3.238822 | 1.365030  | 0.000794  |
| N | -1.069091 | -1.160264 | 0.000475  |

-----

## Statistical Thermodynamic Analysis

Temperature= 298.150 Kelvin Pressure= 1.00000 Atm  
 =====

SCF Energy= -225.520336906 Predicted Change= -2.362370D-07  
 Zero-point correction (ZPE)= -225.4620 0.05827  
 Internal Energy (U)= -225.4582 0.06212  
 Enthalpy (H)= -225.4572 0.06306  
 Gibbs Free Energy (G)= -225.4889 0.03137  
 -----

Frequencies -- 418.4776 582.9895 624.9386

Supporting Information: **45dibromoimidazole.out**

-----  
 Using Gaussian 03: IA32L-G03RevC.02 12-Jun-2004  
 =====

# opt freq b3lyp/6-31g(d)

#N Geom=AllCheck Guess=Read SCRF=Check GenChk RB3LYP/6-31G(d) Freq

-----  
 Pointgroup= C1 Stoichiometry= C3H2Br2N2 C1[X(C3H2Br2N2)] #Atoms= 9

Charge = 0 Multiplicity = 1  
 -----

SCF Energy= -5368.41522326 Predicted Change= -6.513772D-07  
 =====

Optimization completed. {Found 2 times}

Item Max Val. Criteria Pass? RMS Val. Criteria Pass?

Force 0.00018 || 0.00045 [ YES ] 0.00007 || 0.00030 [ YES ]

Displ 0.00161 || 0.00180 [ YES ] 0.00161 || 0.00180 [ YES ]  
 -----

Atomic Coordinates (Angstroms)

| Atomic Type | X         | Y         | Z         |
|-------------|-----------|-----------|-----------|
| C           | -0.017732 | 2.694335  | 0.000163  |
| C           | -0.702138 | 0.675541  | 0.000140  |
| C           | 0.668925  | 0.601975  | -0.000050 |
| N           | 1.101004  | 1.911189  | 0.000033  |
| H           | 2.066723  | 2.208684  | -0.000001 |
| N           | -1.120554 | 1.974077  | -0.000026 |
| Br          | 1.840543  | -0.849351 | -0.000219 |
| H           | 0.030221  | 3.774538  | 0.000217  |
| Br          | -1.887813 | -0.779540 | 0.000168  |

-----  
 Statistical Thermodynamic Analysis

Temperature= 298.150 Kelvin Pressure= 1.00000 Atm  
 =====

SCF Energy= -5368.41522326 Predicted Change= -6.513772D-07

Zero-point correction (ZPE)= -5368.3638 0.05138

Internal Energy (U)= -5368.3574 0.05776

Enthalpy (H)= -5368.3565 0.05871

Gibbs Free Energy (G)= -5368.3970 0.01816  
 -----

Frequencies -- 102.0889 187.3436 243.3005



Supporting Information: **4bromo2radicalimidazole.out**

-----  
 Using Gaussian 03: IA32L-G03RevC.02 12-Jun-2004  
 =====

#opt nosymm freq ub3lyp/6-31g(d)  
 #N Geom=AllCheck Guess=Read SCRF=Check GenChk UB3LYP/6-31G(d) Freq  
 -----

Pointgroup= C1 Stoichiometry= C3H2BrN2(2) C1[X(C3H2BrN2)] #Atoms= 8  
 Charge = 0 Multiplicity = 2  
 -----

SCF Energy= -2796.62132009 Predicted Change= -5.699196D-08  
 =====

Optimization completed. {Found 2 times}  
 Item Max Val. Criteria Pass? RMS Val. Criteria Pass?  
 Force 0.00009 || 0.00045 [ YES ] 0.00003 || 0.00030 [ YES ]  
 Displ 0.00050 || 0.00180 [ YES ] 0.00050 || 0.00180 [ YES ]  
 -----

Atomic Coordinates (Angstroms)  
 Type X Y Z  
 -----

|    |           |           |           |
|----|-----------|-----------|-----------|
| C  | 1.022825  | 0.203636  | -0.000037 |
| C  | -1.079913 | 0.283507  | 0.000132  |
| C  | -0.676092 | 1.593018  | 0.000091  |
| N  | 0.716871  | 1.525383  | 0.000241  |
| H  | 1.362546  | 2.300879  | 0.000380  |
| H  | -1.222700 | 2.523060  | 0.000143  |
| N  | 0.004208  | -0.574766 | -0.000132 |
| Br | -2.855759 | -0.337434 | 0.000190  |

-----

## Statistical Thermodynamic Analysis

Temperature= 298.150 Kelvin Pressure= 1.00000 Atm  
 =====

SCF Energy= -2796.62132009 Predicted Change= -5.699196D-08  
 Zero-point correction (ZPE)= -2796.5729 0.04838  
 Internal Energy (U)= -2796.5678 0.05344  
 Enthalpy (H)= -2796.5669 0.05439  
 Gibbs Free Energy (G)= -2796.6034 0.01791  
 -----

Frequencies -- 228.5309 270.3192 360.2303

Supporting Information: **4bromo5radicalimidazole.out**

-----  
 Using Gaussian 03: IA32L-G03RevC.02 12-Jun-2004  
 =====

#opt nosymm freq ub3lyp/6-31g(d)  
 #N Geom=AllCheck Guess=Read SCRF=Check GenChk UB3LYP/6-31G(d) Freq  
 -----

Pointgroup= C1 Stoichiometry= C3H2BrN2(2) C1[X(C3H2BrN2)] #Atoms= 8  
 Charge = 0 Multiplicity = 2  
 -----

SCF Energy= -2796.61418598 Predicted Change= -1.356071D-07  
 =====

Optimization completed. {Found 2 times}  
 Item Max Val. Criteria Pass? RMS Val. Criteria Pass?  
 Force 0.00013 || 0.00045 [ YES ] 0.00004 || 0.00030 [ YES ]  
 Displ 0.00053 || 0.00180 [ YES ] 0.00053 || 0.00180 [ YES ]  
 -----

Atomic Coordinates (Angstroms)  
 Type X Y Z  
 -----

|    |           |           |           |
|----|-----------|-----------|-----------|
| C  | -0.010932 | 2.697096  | -0.000016 |
| C  | -0.701928 | 0.657291  | 0.000017  |
| C  | 0.661712  | 0.617281  | -0.000132 |
| N  | 1.109820  | 1.913885  | 0.000111  |
| H  | 2.074243  | 2.213604  | 0.000125  |
| N  | -1.110101 | 1.966745  | 0.000432  |
| H  | 0.021862  | 3.777898  | 0.000012  |
| Br | -1.906040 | -0.783001 | 0.000096  |

-----

## Statistical Thermodynamic Analysis

Temperature= 298.150 Kelvin Pressure= 1.00000 Atm  
 =====

SCF Energy= -2796.61418598 Predicted Change= -1.356071D-07  
 Zero-point correction (ZPE)= -2796.5658 0.04838  
 Internal Energy (U)= -2796.5607 0.05346  
 Enthalpy (H)= -2796.5597 0.05441  
 Gibbs Free Energy (G)= -2796.5963 0.01785  
 -----

Frequencies -- 204.8539 268.5452 363.6059

Supporting Information: **4bromoimidazole.out**

-----  
 Using Gaussian 03: IA32L-G03RevC.02 12-Jun-2004  
 =====

# opt=(modredundant) freq b3lyp/6-31g(d) geom=connectivity  
 #N Geom=AllCheck Guess=Read SCRF=Check GenChk RB3LYP/6-31G(d) Freq  
 -----

Pointgroup= C1 Stoichiometry= C3H3BrN2 C1[X(C3H3BrN2)] #Atoms= 9  
 Charge = 0 Multiplicity = 1  
 -----

SCF Energy= -2797.31643040 Predicted Change= -7.080222D-07  
 =====

Optimization completed. {Found 1 times}  
 Item Max Val. Criteria Pass? RMS Val. Criteria Pass?  
 Force 0.00036 || 0.00045 [ YES ] 0.00010 || 0.00030 [ YES ]  
 Displ 0.00185 || 0.00180 [ NO ] 0.00185 || 0.00180 [ YES ]  
 -----

Atomic Coordinates (Angstroms)  
 Type X Y Z  
 -----

|    |           |           |           |
|----|-----------|-----------|-----------|
| C  | 2.313371  | -0.762392 | -0.000089 |
| C  | 0.332378  | 0.001138  | -0.000002 |
| C  | 1.137465  | 1.112189  | 0.000107  |
| N  | 2.418939  | 0.599194  | 0.000074  |
| H  | 3.273983  | 1.136962  | 0.000184  |
| H  | 3.176250  | -1.414197 | -0.000171 |
| H  | 0.921827  | 2.168461  | 0.000171  |
| N  | 1.056061  | -1.155696 | 0.000036  |
| Br | -1.554181 | -0.002895 | -0.000030 |

-----

## Statistical Thermodynamic Analysis

Temperature= 298.150 Kelvin Pressure= 1.00000 Atm  
 =====

SCF Energy= -2797.31643040 Predicted Change= -7.080222D-07  
 Zero-point correction (ZPE)= -2797.2550 0.06134  
 Internal Energy (U)= -2797.2500 0.06635  
 Enthalpy (H)= -2797.2491 0.06729  
 Gibbs Free Energy (G)= -2797.2849 0.03152  
 -----

Frequencies -- 228.7412 267.2396 358.8886

Supporting Information: **4bromoimidazol radical.out**

-----  
 Using Gaussian 03: IA32L-G03RevC.02 12-Jun-2004  
 =====

# opt nosymm freq ub3lyp/6-31g(d) geom=connectivity  
 #N Geom=AllCheck Guess=Read SCRF=Check GenChk UB3LYP/6-31G(d) Freq  
 -----

Pointgroup= C1 Stoichiometry= C3H3N2(2) C1[X(C3H3N2)] #Atoms= 8  
 Charge = 0 Multiplicity = 2  
 -----

SCF Energy= -225.520044563 Predicted Change= -3.998792D-07  
 =====

Optimization completed. {Found 2 times}  
 Item Max Val. Criteria Pass? RMS Val. Criteria Pass?  
 Force 0.00011 || 0.00045 [ YES ] 0.00005 || 0.00030 [ YES ]  
 Displ 0.00132 || 0.00180 [ YES ] 0.00132 || 0.00180 [ YES ]  
 -----

Atomic Coordinates (Angstroms)  
 Type X Y Z  
 -----

|   |          |           |           |
|---|----------|-----------|-----------|
| C | 2.316301 | -0.762314 | -0.000485 |
| C | 0.343843 | -0.009574 | 0.000313  |
| C | 1.127004 | 1.114262  | -0.000208 |
| N | 2.418772 | 0.598439  | 0.000497  |
| H | 3.277524 | 1.131997  | 0.000812  |
| H | 3.178820 | -1.414931 | -0.000782 |
| H | 0.920626 | 2.172078  | -0.000380 |
| N | 1.047384 | -1.144299 | 0.000543  |

-----

## Statistical Thermodynamic Analysis

Temperature= 298.150 Kelvin Pressure= 1.00000 Atm  
 =====

SCF Energy= -225.520044563 Predicted Change= -3.998792D-07  
 Zero-point correction (ZPE)= -225.4614 0.05856  
 Internal Energy (U)= -225.4577 0.06230  
 Enthalpy (H)= -225.4567 0.06325  
 Gibbs Free Energy (G)= -225.4883 0.03173  
 -----

Frequencies -- 524.1009 599.9792 671.2369

Supporting Information: **5bromo2radicalimidazole.out**

-----  
 Using Gaussian 03: IA32L-G03RevC.02 12-Jun-2004  
 =====

#opt nosymm freq ub3lyp/6-31g(d)  
 #N Geom=AllCheck Guess=Read SCRF=Check GenChk UB3LYP/6-31G(d) Freq  
 -----

Pointgroup= C1 Stoichiometry= C3H2BrN2(2) C1[X(C3H2BrN2)] #Atoms= 8  
 Charge = 0 Multiplicity = 2  
 -----

SCF Energy= -2796.62080926 Predicted Change= -7.317291D-07  
 =====

Optimization completed. {Found 2 times}  
 Item Max Val. Criteria Pass? RMS Val. Criteria Pass?  
 Force 0.00035 || 0.00045 [ YES ] 0.00011 || 0.00030 [ YES ]  
 Displ 0.00086 || 0.00180 [ YES ] 0.00086 || 0.00180 [ YES ]  
 -----

Atomic Coordinates (Angstroms)  
 Type X Y Z  
 -----

|    |           |           |           |
|----|-----------|-----------|-----------|
| C  | -1.080609 | 0.373493  | 0.000175  |
| C  | 0.629747  | 1.645636  | -0.000223 |
| C  | 1.103148  | 0.360504  | 0.000278  |
| N  | -0.015103 | -0.470141 | -0.000152 |
| H  | -0.015039 | -1.479226 | -0.000266 |
| H  | 1.186636  | 2.570903  | -0.000403 |
| N  | -0.762145 | 1.610731  | 0.000248  |
| Br | 2.843312  | -0.331680 | 0.000562  |

-----

## Statistical Thermodynamic Analysis

Temperature= 298.150 Kelvin Pressure= 1.00000 Atm  
 =====

SCF Energy= -2796.62080926 Predicted Change= -7.317291D-07  
 Zero-point correction (ZPE)= -2796.5722 0.04852  
 Internal Energy (U)= -2796.5671 0.05361  
 Enthalpy (H)= -2796.5662 0.05456  
 Gibbs Free Energy (G)= -2796.6028 0.01798  
 -----

Frequencies -- 213.1079 252.1454 363.9655

Supporting Information: **5bromo4radicalimidazole.out**

-----  
 Using Gaussian 03: IA32L-G03RevC.02 12-Jun-2004  
 =====

#opt nosymm freq ub3lyp/6-31g(d)  
 #N Geom=AllCheck Guess=Read SCRF=Check GenChk UB3LYP/6-31G(d) Freq  
 -----

Pointgroup= C1 Stoichiometry= C3H2BrN2(2) C1[X(C3H2BrN2)] #Atoms= 8  
 Charge = 0 Multiplicity = 2  
 -----

SCF Energy= -2796.61799131 Predicted Change= -1.893118D-07  
 =====

Optimization completed. {Found 2 times}  
 Item Max Val. Criteria Pass? RMS Val. Criteria Pass?  
 Force 0.00019 || 0.00045 [ YES ] 0.00004 || 0.00030 [ YES ]  
 Displ 0.00077 || 0.00180 [ YES ] 0.00077 || 0.00180 [ YES ]  
 -----

Atomic Coordinates (Angstroms)  
 Type X Y Z  
 -----

|    |           |           |           |
|----|-----------|-----------|-----------|
| C  | -0.015213 | 2.697727  | -0.000132 |
| C  | -0.704176 | 0.693861  | 0.000214  |
| C  | 0.659058  | 0.592008  | -0.000202 |
| N  | 1.098776  | 1.909126  | 0.000281  |
| H  | 2.064622  | 2.209269  | 0.000421  |
| N  | -1.117070 | 1.961060  | 0.000388  |
| Br | 1.849886  | -0.850087 | -0.000501 |
| H  | 0.031109  | 3.778024  | -0.000213 |

-----

## Statistical Thermodynamic Analysis

Temperature= 298.150 Kelvin Pressure= 1.00000 Atm  
 =====

SCF Energy= -2796.61799131 Predicted Change= -1.893118D-07  
 Zero-point correction (ZPE)= -2796.5692 0.04877  
 Internal Energy (U)= -2796.5642 0.05376  
 Enthalpy (H)= -2796.5632 0.05470  
 Gibbs Free Energy (G)= -2796.5996 0.01829  
 -----

Frequencies -- 204.8625 255.0440 367.7196

Supporting Information: **5bromoimidazole.out**

-----  
 Using Gaussian 03: IA32L-G03RevC.02 12-Jun-2004  
 =====

# opt=(modredundant) freq b3lyp/6-31g(d) geom=connectivity  
 #N Geom=AllCheck Guess=Read SCRF=Check GenChk RB3LYP/6-31G(d) Freq  
 -----

Pointgroup= C1 Stoichiometry= C3H3BrN2 C1[X(C3H3BrN2)] #Atoms= 9  
 Charge = 0 Multiplicity = 1  
 -----

SCF Energy= -2797.31454511 Predicted Change= -2.034681D-07  
 =====

Optimization completed. {Found 2 times}  
 Item Max Val. Criteria Pass? RMS Val. Criteria Pass?  
 Force 0.00020 || 0.00045 [ YES ] 0.00005 || 0.00030 [ YES ]  
 Displ 0.00179 || 0.00180 [ YES ] 0.00179 || 0.00180 [ YES ]  
 -----

Atomic Coordinates (Angstroms)  
 Type X Y Z  
 -----

|    |           |           |           |
|----|-----------|-----------|-----------|
| C  | 2.412978  | -0.621182 | 0.000218  |
| C  | 1.200992  | 1.151137  | 0.000066  |
| C  | 0.332324  | 0.090839  | 0.000025  |
| N  | 1.112535  | -1.044952 | -0.000057 |
| H  | 0.768856  | -1.994666 | -0.000162 |
| H  | 3.245063  | -1.312322 | 0.000296  |
| H  | 0.963065  | 2.205064  | 0.000052  |
| N  | 2.498714  | 0.691481  | 0.000185  |
| Br | -1.540957 | -0.004244 | -0.000084 |

-----

## Statistical Thermodynamic Analysis

Temperature= 298.150 Kelvin Pressure= 1.00000 Atm  
 =====

SCF Energy= -2797.31454511 Predicted Change= -2.034681D-07  
 Zero-point correction (ZPE)= -2797.2530 0.06147  
 Internal Energy (U)= -2797.2480 0.06650  
 Enthalpy (H)= -2797.2470 0.06744  
 Gibbs Free Energy (G)= -2797.2829 0.03158  
 -----

Frequencies -- 212.1837 249.6710 363.0582

Supporting Information: **5bromoimidazol radical.out**

-----  
 Using Gaussian 03: IA32L-G03RevC.02 12-Jun-2004  
 =====

# opt nosymm freq ub3lyp/6-31g(d) geom=connectivity  
 #N Geom=AllCheck Guess=Read SCRF=Check GenChk UB3LYP/6-31G(d) Freq  
 -----

Pointgroup= C1 Stoichiometry= C3H3N2(2) C1[X(C3H3N2)] #Atoms= 8  
 Charge = 0 Multiplicity = 2  
 -----

SCF Energy= -225.515272108 Predicted Change= -6.368329D-07  
 =====

Optimization completed. {Found 2 times}  
 Item Max Val. Criteria Pass? RMS Val. Criteria Pass?  
 Force 0.00038 || 0.00045 [ YES ] 0.00009 || 0.00030 [ YES ]  
 Displ 0.00125 || 0.00180 [ YES ] 0.00125 || 0.00180 [ YES ]  
 -----

Atomic Coordinates (Angstroms)  
 Type X Y Z  
 -----

|   |          |           |           |
|---|----------|-----------|-----------|
| C | 2.411281 | -0.630026 | 0.000045  |
| C | 1.190782 | 1.164547  | 0.000026  |
| C | 0.347808 | 0.089422  | -0.000226 |
| N | 1.109927 | -1.052051 | 0.000053  |
| H | 0.767230 | -2.001452 | 0.000030  |
| H | 3.252154 | -1.310435 | 0.000116  |
| H | 0.965730 | 2.219686  | 0.000045  |
| N | 2.489615 | 0.685707  | 0.000535  |

-----

## Statistical Thermodynamic Analysis

Temperature= 298.150 Kelvin Pressure= 1.00000 Atm  
 =====

SCF Energy= -225.515272108 Predicted Change= -6.368329D-07  
 Zero-point correction (ZPE)= -225.4568 0.05843  
 Internal Energy (U)= -225.4530 0.06223  
 Enthalpy (H)= -225.4520 0.06317  
 Gibbs Free Energy (G)= -225.4837 0.03155  
 -----

Frequencies -- 434.4395 556.1786 679.1289



**Bromothiazole**Supporting Information: **24dibromothiazole.out**-----  
Using Gaussian 03: IA32L-G03RevC.02 12-Jun-2004  
=====

# opt freq b3lyp/6-31g(d)

#N Geom=AllCheck Guess=Read SCRF=Check GenChk RB3LYP/6-31G(d) Freq  
-----

Pointgroup= C1 Stoichiometry= C3HBr2NS C1[X(C3HBr2NS)] #Atoms= 8

Charge = 0 Multiplicity = 1  
-----SCF Energy= -5711.24624076 Predicted Change= -2.939020D-07  
=====

Optimization completed. {Found 2 times}

| Item  | Max Val. | Criteria | Pass?   | RMS Val. | Criteria | Pass?   |
|-------|----------|----------|---------|----------|----------|---------|
| Force | 0.00020  | 0.00045  | [ YES ] | 0.00006  | 0.00030  | [ YES ] |
| Displ | 0.00079  | 0.00180  | [ YES ] | 0.00079  | 0.00180  | [ YES ] |

-----  
Atomic Coordinates (Angstroms)  
Type X Y Z  
-----

|    |           |           |           |
|----|-----------|-----------|-----------|
| C  | -0.901880 | 1.590048  | 0.000194  |
| C  | -1.149564 | 0.249417  | 0.000325  |
| C  | 1.020095  | 0.110336  | 0.000273  |
| H  | -1.606787 | 2.408279  | 0.000068  |
| N  | -0.066093 | -0.590719 | 0.000114  |
| S  | 0.817260  | 1.848410  | 0.000256  |
| Br | 2.749038  | -0.634137 | -0.000397 |
| Br | -2.886713 | -0.495766 | 0.000119  |

-----  
Statistical Thermodynamic AnalysisTemperature= 298.150 Kelvin Pressure= 1.00000 Atm  
=====

SCF Energy= -5711.24624076 Predicted Change= -2.939020D-07

Zero-point correction (ZPE)= -5711.2112 0.03503

Internal Energy (U)= -5711.2045 0.04174

Enthalpy (H)= -5711.2035 0.04268

Gibbs Free Energy (G)= -5711.2451 0.00110  
-----

Frequencies -- 132.7824 142.1576 227.2364

Supporting Information: **25dibromothiazole.out**

-----  
 Using Gaussian 03: IA32L-G03RevC.02 12-Jun-2004  
 =====

# opt freq b3lyp/6-31g(d)

#N Geom=AllCheck Guess=Read SCRF=Check GenChk RB3LYP/6-31G(d) Freq

-----  
 Pointgroup= C1 Stoichiometry= C3HBr2NS C1[X(C3HBr2NS)] #Atoms= 8

Charge = 0 Multiplicity = 1

-----  
 SCF Energy= -5711.24368131 Predicted Change= -2.388869D-08  
 =====

Optimization completed. {Found 2 times}

Item Max Val. Criteria Pass? RMS Val. Criteria Pass?

Force 0.00004 || 0.00045 [ YES ] 0.00001 || 0.00030 [ YES ]

Displ 0.00030 || 0.00180 [ YES ] 0.00030 || 0.00180 [ YES ]

-----  
 Atomic Coordinates (Angstroms)  
 Type X Y Z

|    |           |           |           |
|----|-----------|-----------|-----------|
| C  | -1.212998 | 0.267677  | -0.000017 |
| C  | -0.632462 | 1.502326  | 0.000044  |
| C  | 1.202758  | 0.299255  | 0.000295  |
| H  | -1.171002 | 2.441766  | -0.000068 |
| N  | 0.745806  | 1.506317  | 0.000110  |
| S  | 0.006598  | -0.981994 | 0.000072  |
| Br | 3.037196  | -0.135853 | 0.000184  |
| Br | -3.045738 | -0.140993 | -0.000292 |

-----  
 Statistical Thermodynamic Analysis

Temperature= 298.150 Kelvin Pressure= 1.00000 Atm

-----  
 SCF Energy= -5711.24368131 Predicted Change= -2.388869D-08

Zero-point correction (ZPE)= -5711.2084 0.03527

Internal Energy (U)= -5711.2016 0.04203

Enthalpy (H)= -5711.2006 0.04298

Gibbs Free Energy (G)= -5711.2423 0.00129

-----  
 Frequencies -- 89.6615 136.4250 238.4459

Supporting Information: **2bromo4radicalthiazole.out**

-----  
 Using Gaussian 03: IA32L-G03RevC.02 12-Jun-2004  
 =====

# opt freq ub3lyp/6-31g(d)  
 #N Geom=AllCheck Guess=Read SCRF=Check GenChk UB3LYP/6-31G(d) Freq  
 -----

Pointgroup= C1 Stoichiometry= C3HBrNS(2) C1[X(C3HBrNS)] #Atoms= 7  
 Charge = 0 Multiplicity = 2  
 -----

SCF Energy= -3139.45601533 Predicted Change= -1.403193D-08  
 =====

Optimization completed. {Found 2 times}  
 Item Max Val. Criteria Pass? RMS Val. Criteria Pass?  
 Force 0.00003 || 0.00045 [ YES ] 0.00001 || 0.00030 [ YES ]  
 Displ 0.00016 || 0.00180 [ YES ] 0.00016 || 0.00180 [ YES ]  
 -----

| Atomic<br>Type | Coordinates (Angstroms) |           |           |
|----------------|-------------------------|-----------|-----------|
|                | X                       | Y         | Z         |
| C              | 2.621943                | -0.004647 | 0.000193  |
| C              | 2.094337                | 1.239954  | 0.000245  |
| C              | 0.187858                | 0.250479  | -0.000051 |
| H              | 3.646671                | -0.344951 | 0.000278  |
| N              | 0.766642                | 1.416706  | 0.000140  |
| S              | 1.266074                | -1.128444 | 0.000078  |
| Br             | -1.677005               | -0.012331 | -0.000138 |

-----

Statistical Thermodynamic Analysis  
 Temperature= 298.150 Kelvin Pressure= 1.00000 Atm  
 =====

SCF Energy= -3139.45601533 Predicted Change= -1.403193D-08  
 Zero-point correction (ZPE)= -3139.4235 0.03249  
 Internal Energy (U)= -3139.4182 0.03773  
 Enthalpy (H)= -3139.4173 0.03868  
 Gibbs Free Energy (G)= -3139.4547 0.00126  
 -----

Frequencies -- 198.8343 222.7794 336.7616

Supporting Information: **2bromo5radicalthiazole.out**

-----  
 Using Gaussian 03: IA32L-G03RevC.02 12-Jun-2004  
 =====

# opt freq ub3lyp/6-31g(d)

#N Geom=AllCheck Guess=Read SCRF=Check GenChk UB3LYP/6-31G(d) Freq

-----  
 Pointgroup= C1 Stoichiometry= C3HBrNS(2) C1[X(C3HBrNS)] #Atoms= 7

Charge = 0 Multiplicity = 2

-----  
 SCF Energy= -3139.44949878 Predicted Change= -5.467955D-07  
 =====

Optimization completed. {Found 2 times}

Item Max Val. Criteria Pass? RMS Val. Criteria Pass?

Force 0.00011 || 0.00045 [ YES ] 0.00006 || 0.00030 [ YES ]

Displ 0.00144 || 0.00180 [ YES ] 0.00144 || 0.00180 [ YES ]

-----  
 Atomic Coordinates (Angstroms)  
 Type X Y Z

|    |           |           |           |
|----|-----------|-----------|-----------|
| C  | -2.570739 | -0.157115 | 0.000993  |
| C  | -2.213409 | 1.148349  | -0.000211 |
| C  | -0.212482 | 0.198567  | 0.000721  |
| H  | -2.866382 | 2.010794  | -0.000263 |
| N  | -0.833982 | 1.331951  | -0.000575 |
| S  | -1.223836 | -1.241377 | -0.000372 |
| Br | 1.664726  | 0.039679  | 0.000035  |

-----  
 Statistical Thermodynamic Analysis

Temperature= 298.150 Kelvin Pressure= 1.00000 Atm

-----  
 SCF Energy= -3139.44949878 Predicted Change= -5.467955D-07

Zero-point correction (ZPE)= -3139.4167 0.03270

Internal Energy (U)= -3139.4115 0.03795

Enthalpy (H)= -3139.4106 0.03889

Gibbs Free Energy (G)= -3139.4480 0.00142

-----  
 Frequencies -- 200.3271 220.8150 334.3415

Supporting Information: **2bromothiazole.out**

-----  
 Using Gaussian 03: IA32L-G03RevC.02 12-Jun-2004  
 =====

# opt=(modredundant) freq b3lyp/6-31g(d) geom=connectivity  
 #N Geom=AllCheck Guess=Read SCRF=Check GenChk RB3LYP/6-31G(d) Freq  
 -----

Pointgroup= C1 Stoichiometry= C3H2BrNS C1[X(C3H2BrNS)] #Atoms= 8  
 Charge = 0 Multiplicity = 1  
 -----

SCF Energy= -3140.14649054 Predicted Change= -6.864528D-07  
 =====

Optimization completed. {Found 2 times}  
 Item Max Val. Criteria Pass? RMS Val. Criteria Pass?  
 Force 0.00031 || 0.00045 [ YES ] 0.00008 || 0.00030 [ YES ]  
 Displ 0.00144 || 0.00180 [ YES ] 0.00144 || 0.00180 [ YES ]  
 -----

Atomic Coordinates (Angstroms)  
 Type X Y Z  
 -----

|    |           |           |           |
|----|-----------|-----------|-----------|
| C  | 2.560947  | -0.134687 | 0.000289  |
| C  | 2.136752  | 1.161729  | -0.000039 |
| C  | 0.162931  | 0.218073  | 0.000002  |
| H  | 3.572568  | -0.516343 | 0.000436  |
| H  | 2.785826  | 2.029696  | 0.000035  |
| N  | 0.770904  | 1.356656  | 0.000526  |
| S  | 1.189531  | -1.202090 | 0.000022  |
| Br | -1.712886 | 0.021509  | -0.000172 |

-----

## Statistical Thermodynamic Analysis

Temperature= 298.150 Kelvin Pressure= 1.00000 Atm  
 =====

SCF Energy= -3140.14649054 Predicted Change= -6.864528D-07  
 Zero-point correction (ZPE)= -3140.1011 0.04529  
 Internal Energy (U)= -3140.0959 0.05054  
 Enthalpy (H)= -3140.0950 0.05148  
 Gibbs Free Energy (G)= -3140.1318 0.01467  
 -----

Frequencies -- 198.6738 223.4568 334.0959

Supporting Information: **2bromothiazoleradical.out**

-----  
 Using Gaussian 03: IA32L-G03RevC.02 12-Jun-2004  
 =====

# opt nosymm freq ub3lyp/6-31g(d) geom=connectivity  
 #N Geom=AllCheck Guess=Read SCRF=Check GenChk UB3LYP/6-31G(d) Freq  
 -----

Pointgroup= C1 Stoichiometry= C3H2NS(2) C1[X(C3H2NS)] #Atoms= 7  
 Charge = 0 Multiplicity = 2  
 -----

SCF Energy= -568.360798177 Predicted Change= -3.001141D-08  
 =====

Optimization completed. {Found 2 times}  
 Item Max Val. Criteria Pass? RMS Val. Criteria Pass?  
 Force 0.00008 || 0.00045 [ YES ] 0.00002 || 0.00030 [ YES ]  
 Displ 0.00030 || 0.00180 [ YES ] 0.00030 || 0.00180 [ YES ]  
 -----

Atomic Coordinates (Angstroms)  
 Type X Y Z  
 -----

|   |          |           |          |
|---|----------|-----------|----------|
| C | 2.564594 | -0.130836 | 0.000197 |
| C | 2.149162 | 1.165955  | 0.000118 |
| C | 0.163475 | 0.225585  | 0.000082 |
| H | 3.575581 | -0.515845 | 0.000303 |
| H | 2.788756 | 2.040016  | 0.000190 |
| N | 0.764886 | 1.330846  | 0.000212 |
| S | 1.173006 | -1.202688 | 0.000169 |

## Statistical Thermodynamic Analysis

Temperature= 298.150 Kelvin Pressure= 1.00000 Atm  
 =====

SCF Energy= -568.360798177 Predicted Change= -3.001141D-08  
 Zero-point correction (ZPE)= -568.3181 0.04263  
 Internal Energy (U)= -568.3141 0.04660  
 Enthalpy (H)= -568.3132 0.04754  
 Gibbs Free Energy (G)= -568.3459 0.01485  
 -----

Frequencies -- 438.1695 551.6810 569.8103

Supporting Information: **4bromo2radicalthiazole.out**

-----  
 Using Gaussian 03: IA32L-G03RevC.02 12-Jun-2004  
 =====

# opt freq ub3lyp/6-31g(d)

#N Geom=AllCheck Guess=Read SCRF=Check GenChk UB3LYP/6-31G(d) Freq

-----  
 Pointgroup= C1 Stoichiometry= C3HBrNS(2) C1[X(C3HBrNS)] #Atoms= 7

Charge = 0 Multiplicity = 2

-----  
 SCF Energy= -3139.46035855 Predicted Change= -2.278317D-07  
 =====

Optimization completed. {Found 2 times}

Item Max Val. Criteria Pass? RMS Val. Criteria Pass?

Force 0.00018 || 0.00045 [ YES ] 0.00005 || 0.00030 [ YES ]

Displ 0.00105 || 0.00180 [ YES ] 0.00105 || 0.00180 [ YES ]

-----  
 Atomic Coordinates (Angstroms)  
 Type X Y Z

C -0.906516 -0.995771 0.000406

C -0.061679 0.072593 0.000121

C -1.921698 1.203394 0.000545

H -0.662984 -2.048478 0.000386

N -0.666105 1.319924 0.000335

S -2.564677 -0.419501 -0.000321

Br 1.819998 -0.061722 -0.000115

-----  
 Statistical Thermodynamic Analysis

Temperature= 298.150 Kelvin Pressure= 1.00000 Atm

-----  
 SCF Energy= -3139.46035855 Predicted Change= -2.278317D-07

Zero-point correction (ZPE)= -3139.4277 0.03259

Internal Energy (U)= -3139.4224 0.03786

Enthalpy (H)= -3139.4215 0.03880

Gibbs Free Energy (G)= -3139.4590 0.00133

-----  
 Frequencies -- 188.4845 250.6941 324.1134

Supporting Information: **4bromothiazole.out**

-----  
 Using Gaussian 03: IA32L-G03RevC.02 12-Jun-2004  
 =====

# opt=(modredundant) freq b3lyp/6-31g(d) geom=connectivity  
 #N Geom=AllCheck Guess=Read SCRF=Check GenChk RB3LYP/6-31G(d) Freq  
 -----

Pointgroup= C1 Stoichiometry= C3H2BrNS C1[X(C3H2BrNS)] #Atoms= 8  
 Charge = 0 Multiplicity = 1  
 -----

SCF Energy= -3140.14762967 Predicted Change= -4.339951D-07  
 =====

Optimization completed. {Found 1 times}  
 Item Max Val. Criteria Pass? RMS Val. Criteria Pass?  
 Force 0.00019 || 0.00045 [ YES ] 0.00006 || 0.00030 [ YES ]  
 Displ 0.00211 || 0.00180 [ NO ] 0.00211 || 0.00180 [ YES ]  
 -----

Atomic Coordinates (Angstroms)  
 Type X Y Z  
 -----

|    |           |           |           |
|----|-----------|-----------|-----------|
| C  | 0.853252  | -1.039486 | -0.000029 |
| C  | 0.039487  | 0.056218  | 0.000120  |
| C  | 1.935699  | 1.137904  | 0.000166  |
| H  | 0.581271  | -2.084245 | -0.000136 |
| N  | 0.642497  | 1.283671  | -0.000066 |
| S  | 2.504523  | -0.513422 | 0.000028  |
| H  | 2.634018  | 1.966466  | 0.000215  |
| Br | -1.850165 | -0.045171 | -0.000046 |

-----

## Statistical Thermodynamic Analysis

Temperature= 298.150 Kelvin Pressure= 1.00000 Atm  
 =====

SCF Energy= -3140.14762967 Predicted Change= -4.339951D-07  
 Zero-point correction (ZPE)= -3140.1023 0.04529  
 Internal Energy (U)= -3140.0971 0.05051  
 Enthalpy (H)= -3140.0961 0.05145  
 Gibbs Free Energy (G)= -3140.1329 0.01469  
 -----

Frequencies -- 189.5206 251.2723 324.7948



Supporting Information: **4bromothiazoleradical.out**

-----  
 Using Gaussian 03: IA32L-G03RevC.02 12-Jun-2004  
 =====

# opt nosymm freq ub3lyp/6-31g(d) geom=connectivity  
 #N Geom=AllCheck Guess=Read SCRF=Check GenChk UB3LYP/6-31G(d) Freq  
 -----

Pointgroup= C1 Stoichiometry= C3H2NS(2) C1[X(C3H2NS)] #Atoms= 7  
 Charge = 0 Multiplicity = 2  
 -----

SCF Energy= -568.356726189 Predicted Change= -8.040025D-08  
 =====

Optimization completed. {Found 2 times}  
 Item Max Val. Criteria Pass? RMS Val. Criteria Pass?  
 Force 0.00017 || 0.00045 [ YES ] 0.00005 || 0.00030 [ YES ]  
 Displ 0.00036 || 0.00180 [ YES ] 0.00036 || 0.00180 [ YES ]  
 -----

Atomic Coordinates (Angstroms)  
 Type X Y Z  
 -----

|   |          |           |           |
|---|----------|-----------|-----------|
| C | 0.835659 | -1.047856 | -0.000084 |
| C | 0.065317 | 0.065727  | 0.000052  |
| C | 1.938786 | 1.143323  | 0.000104  |
| H | 0.574513 | -2.095242 | -0.000147 |
| N | 0.634952 | 1.273739  | 0.000098  |
| S | 2.506729 | -0.506878 | 0.000138  |
| H | 2.634791 | 1.974293  | 0.000137  |

-----

## Statistical Thermodynamic Analysis

Temperature= 298.150 Kelvin Pressure= 1.00000 Atm  
 =====

SCF Energy= -568.356726189 Predicted Change= -8.040025D-08  
 Zero-point correction (ZPE)= -568.3141 0.04256  
 Internal Energy (U)= -568.3102 0.04646  
 Enthalpy (H)= -568.3093 0.04741  
 Gibbs Free Energy (G)= -568.3418 0.01483  
 -----

Frequencies -- 458.9562 596.2855 613.2142

Supporting Information: **5bromo2radicalthiazole.out**

-----  
 Using Gaussian 03: IA32L-G03RevC.02 12-Jun-2004  
 =====

# opt freq ub3lyp/6-31g(d)

#N Geom=AllCheck Guess=Read SCRF=Check GenChk UB3LYP/6-31G(d) Freq

-----  
 Pointgroup= C1 Stoichiometry= C3HBrNS(2) C1[X(C3HBrNS)] #Atoms= 7

Charge = 0 Multiplicity = 2

-----  
 SCF Energy= -3139.45918509 Predicted Change= -2.892903D-07  
 =====

Optimization completed. {Found 2 times}

Item Max Val. Criteria Pass? RMS Val. Criteria Pass?

Force 0.00010 || 0.00045 [ YES ] 0.00004 || 0.00030 [ YES ]

Displ 0.00159 || 0.00180 [ YES ] 0.00159 || 0.00180 [ YES ]

-----  
 Atomic Coordinates (Angstroms)  
 Type X Y Z

|    |           |           |           |
|----|-----------|-----------|-----------|
| C  | 0.189216  | 0.190638  | -0.000117 |
| C  | 0.918047  | 1.342397  | 0.000667  |
| C  | 2.591247  | -0.095688 | -0.000917 |
| H  | 0.519331  | 2.348402  | 0.001155  |
| N  | 2.292591  | 1.127062  | -0.000179 |
| S  | 1.251304  | -1.217851 | 0.000359  |
| Br | -1.679411 | 0.017820  | -0.000099 |

-----  
 Statistical Thermodynamic Analysis

Temperature= 298.150 Kelvin Pressure= 1.00000 Atm

-----  
 SCF Energy= -3139.45918509 Predicted Change= -2.892903D-07

Zero-point correction (ZPE)= -3139.4263 0.03279

Internal Energy (U)= -3139.4210 0.03810

Enthalpy (H)= -3139.4201 0.03904

Gibbs Free Energy (G)= -3139.4577 0.00146

-----  
 Frequencies -- 205.5727 207.4290 331.3017

Supporting Information: **5bromothiazole.out**

-----  
 Using Gaussian 03: IA32L-G03RevC.02 12-Jun-2004  
 =====

# opt=(modredundant) freq b3lyp/6-31g(d) geom=connectivity  
 #N Geom=AllCheck Guess=Read SCRF=Check GenChk RB3LYP/6-31G(d) Freq  
 -----

Pointgroup= C1 Stoichiometry= C3H2BrNS C1[X(C3H2BrNS)] #Atoms= 8  
 Charge = 0 Multiplicity = 1  
 -----

SCF Energy= -3140.14406672 Predicted Change= -7.353351D-07  
 =====

Optimization completed. {Found 2 times}  
 Item Max Val. Criteria Pass? RMS Val. Criteria Pass?  
 Force 0.00024 || 0.00045 [ YES ] 0.00009 || 0.00030 [ YES ]  
 Displ 0.00125 || 0.00180 [ YES ] 0.00125 || 0.00180 [ YES ]  
 -----

Atomic Coordinates (Angstroms)  
 Type X Y Z  
 -----

|    |           |           |           |
|----|-----------|-----------|-----------|
| C  | 0.146888  | 0.187873  | -0.000033 |
| C  | 0.875605  | 1.342973  | -0.000270 |
| C  | 2.553161  | -0.087276 | 0.000003  |
| H  | 0.451382  | 2.339741  | -0.000262 |
| N  | 2.240111  | 1.174900  | 0.000642  |
| S  | 1.200572  | -1.198268 | -0.000006 |
| H  | 3.571032  | -0.460276 | 0.000033  |
| Br | -1.724751 | 0.011632  | -0.000068 |

-----

## Statistical Thermodynamic Analysis

Temperature= 298.150 Kelvin Pressure= 1.00000 Atm  
 =====

SCF Energy= -3140.14406672 Predicted Change= -7.353351D-07  
 Zero-point correction (ZPE)= -3140.0985 0.04549  
 Internal Energy (U)= -3140.0933 0.05075  
 Enthalpy (H)= -3140.0923 0.05169  
 Gibbs Free Energy (G)= -3140.1292 0.01482  
 -----

Frequencies -- 199.0845 211.0753 330.3012

Supporting Information: **5bromothiazoleradical.out**

-----  
 Using Gaussian 03: IA32L-G03RevC.02 12-Jun-2004  
 =====

# opt nosymm freq ub3lyp/6-31g(d) geom=connectivity  
 #N Geom=AllCheck Guess=Read SCRF=Check GenChk UB3LYP/6-31G(d) Freq  
 -----

Pointgroup= C1 Stoichiometry= C3H2NS(2) C1[X(C3H2NS)] #Atoms= 7  
 Charge = 0 Multiplicity = 2  
 -----

SCF Energy= -568.349202571 Predicted Change= -8.997638D-07  
 =====

Optimization completed. {Found 1 times}  
 Item Max Val. Criteria Pass? RMS Val. Criteria Pass?  
 Force 0.00039 || 0.00045 [ YES ] 0.00011 || 0.00030 [ YES ]  
 Displ 0.00198 || 0.00180 [ NO ] 0.00198 || 0.00180 [ YES ]  
 -----

Atomic Coordinates (Angstroms)  
 Type X Y Z  
 -----

|   |          |           |           |
|---|----------|-----------|-----------|
| C | 0.175056 | 0.183859  | -0.000246 |
| C | 0.860113 | 1.352945  | 0.000077  |
| C | 2.551720 | -0.093903 | 0.000126  |
| H | 0.449434 | 2.353865  | -0.000129 |
| N | 2.235704 | 1.169728  | 0.000085  |
| S | 1.193973 | -1.209083 | -0.000013 |
| H | 3.572751 | -0.457745 | 0.000208  |

-----

## Statistical Thermodynamic Analysis

Temperature= 298.150 Kelvin Pressure= 1.00000 Atm  
 =====

SCF Energy= -568.349202571 Predicted Change= -8.997638D-07  
 Zero-point correction (ZPE)= -568.3064 0.04274  
 Internal Energy (U)= -568.3025 0.04665  
 Enthalpy (H)= -568.3016 0.04760  
 Gibbs Free Energy (G)= -568.3342 0.01498  
 -----

Frequencies -- 416.3373 582.0011 591.1636

**Bromoisothiazoles**Supporting Information: **35dibromoisothiazole.out**-----  
Using Gaussian 03: IA32L-G03RevC.02 12-Jun-2004  
=====

# opt freq b3lyp/6-31g(d)

#N Geom=AllCheck Guess=Read SCRF=Check GenChk RB3LYP/6-31G(d) Freq

-----  
Pointgroup= C1 Stoichiometry= C3HBr2NS C1[X(C3HBr2NS)] #Atoms= 8Charge = 0 Multiplicity = 1  
-----SCF Energy= -5711.24129875 Predicted Change= -2.317945D-07  
=====

Optimization completed. {Found 2 times}

Item Max Val. Criteria Pass? RMS Val. Criteria Pass?

Force 0.00012 || 0.00045 [ YES ] 0.00005 || 0.00030 [ YES ]

Displ 0.00179 || 0.00180 [ YES ] 0.00179 || 0.00180 [ YES ]  
-----

Atomic Coordinates (Angstroms)

Type X Y Z

-----  
C 1.175374 0.210853 0.000109  
C 0.056664 -0.674599 0.000105  
C -1.087858 0.072904 -0.000015  
S -0.698758 1.761341 0.000141  
H 0.112998 -1.754059 0.000118  
N 0.964108 1.500086 -0.000035  
Br 2.958754 -0.441549 0.000034  
Br -2.860089 -0.546536 -0.000129  
-----

Statistical Thermodynamic Analysis

Temperature= 298.150 Kelvin Pressure= 1.00000 Atm  
=====

SCF Energy= -5711.24129875 Predicted Change= -2.317945D-07

Zero-point correction (ZPE)= -5711.2061 0.03512

Internal Energy (U)= -5711.1994 0.04182

Enthalpy (H)= -5711.1985 0.04276

Gibbs Free Energy (G)= -5711.2401 0.00118  
-----

Frequencies -- 129.2125 132.9751 248.5511

Supporting Information: **3bromo5radicalisothiazole.out**

-----  
 Using Gaussian 03: IA32L-G03RevC.02 12-Jun-2004  
 =====

# opt nosymm freq ub3lyp/6-31g(d)  
 #N Geom=AllCheck Guess=Read SCRF=Check GenChk UB3LYP/6-31G(d) Freq  
 -----

Pointgroup= C1 Stoichiometry= C3HBrNS(2) C1[X(C3HBrNS)] #Atoms= 7  
 Charge = 0 Multiplicity = 2  
 -----

SCF Energy= -3139.44861392 Predicted Change= -3.874606D-07  
 =====

Optimization completed. {Found 2 times}  
 Item Max Val. Criteria Pass? RMS Val. Criteria Pass?  
 Force 0.00009 || 0.00045 [ YES ] 0.00005 || 0.00030 [ YES ]  
 Displ 0.00117 || 0.00180 [ YES ] 0.00117 || 0.00180 [ YES ]  
 -----

Atomic Coordinates (Angstroms)  
 Type X Y Z  
 -----

|    |           |           |           |
|----|-----------|-----------|-----------|
| C  | 1.172222  | 0.203042  | -0.000345 |
| C  | 0.052064  | -0.688506 | -0.000148 |
| C  | -1.058427 | 0.095551  | 0.000701  |
| S  | -0.714233 | 1.765099  | -0.000550 |
| H  | 0.102747  | -1.768240 | 0.000068  |
| N  | 0.965609  | 1.496559  | 0.000640  |
| Br | 2.961300  | -0.428527 | 0.000091  |

-----

## Statistical Thermodynamic Analysis

Temperature= 298.150 Kelvin Pressure= 1.00000 Atm  
 =====

SCF Energy= -3139.44861392 Predicted Change= -3.874606D-07  
 Zero-point correction (ZPE)= -3139.4159 0.03262  
 Internal Energy (U)= -3139.4107 0.03781  
 Enthalpy (H)= -3139.4098 0.03876  
 Gibbs Free Energy (G)= -3139.4471 0.00144  
 -----

Frequencies -- 203.9341 251.5173 319.5934

Supporting Information: **3bromoisothiazole2.out**

-----  
 Using Gaussian 03: IA32L-G03RevC.02 12-Jun-2004  
 =====

# opt=(modredundant) freq b3lyp/6-31g(d) geom=connectivity  
 #N Geom=AllCheck Guess=Read SCRF=Check GenChk RB3LYP/6-31G(d) Freq  
 -----

Pointgroup= C1 Stoichiometry= C3H2BrNS C1[X(C3H2BrNS)] #Atoms= 8  
 Charge = 0 Multiplicity = 1  
 -----

SCF Energy= -3140.14337328 Predicted Change= -1.212598D-07  
 =====

Optimization completed. {Found 2 times}  
 Item Max Val. Criteria Pass? RMS Val. Criteria Pass?  
 Force 0.00011 || 0.00045 [ YES ] 0.00003 || 0.00030 [ YES ]  
 Displ 0.00046 || 0.00180 [ YES ] 0.00046 || 0.00180 [ YES ]  
 -----

Atomic Coordinates (Angstroms)  
 Type X Y Z  
 -----

|    |           |           |           |
|----|-----------|-----------|-----------|
| C  | 0.062325  | 0.056508  | -0.000005 |
| C  | 0.742616  | 1.312090  | 0.000079  |
| C  | 2.091187  | 1.092560  | -0.000014 |
| S  | 2.395828  | -0.606610 | -0.000054 |
| H  | 0.251835  | 2.276177  | 0.000095  |
| H  | 2.889178  | 1.824277  | -0.000072 |
| N  | 0.769794  | -1.040874 | 0.000160  |
| Br | -1.835417 | -0.053587 | -0.000019 |

-----

## Statistical Thermodynamic Analysis

Temperature= 298.150 Kelvin Pressure= 1.00000 Atm  
 =====

SCF Energy= -3140.14337328 Predicted Change= -1.212598D-07  
 Zero-point correction (ZPE)= -3140.0981 0.04517  
 Internal Energy (U)= -3140.0929 0.05038  
 Enthalpy (H)= -3140.0920 0.05133  
 Gibbs Free Energy (G)= -3140.1287 0.01460  
 -----

Frequencies -- 199.6148 253.0668 320.2384

Supporting Information: **3bromoisothiazoleradical.out**

-----  
 Using Gaussian 03: IA32L-G03RevC.02 12-Jun-2004  
 =====

# opt nosymm freq ub3lyp/6-31g(d) geom=connectivity  
 #N Geom=AllCheck Guess=Read SCRF=Check GenChk UB3LYP/6-31G(d) Freq  
 -----

Pointgroup= C1 Stoichiometry= C3H2NS(2) C1[X(C3H2NS)] #Atoms= 7  
 Charge = 0 Multiplicity = 2  
 -----

SCF Energy= -568.356792065 Predicted Change= -7.293026D-07  
 =====

Optimization completed. {Found 2 times}  
 Item Max Val. Criteria Pass? RMS Val. Criteria Pass?  
 Force 0.00030 || 0.00045 [ YES ] 0.00010 || 0.00030 [ YES ]  
 Displ 0.00130 || 0.00180 [ YES ] 0.00130 || 0.00180 [ YES ]  
 -----

Atomic Coordinates (Angstroms)  
 Type X Y Z  
 -----

|   |          |           |           |
|---|----------|-----------|-----------|
| C | 0.086644 | 0.047959  | -0.000002 |
| C | 0.735646 | 1.317604  | 0.000158  |
| C | 2.086979 | 1.090816  | -0.000118 |
| S | 2.422623 | -0.608841 | 0.000258  |
| H | 0.250001 | 2.283817  | 0.000201  |
| H | 2.885135 | 1.823808  | -0.000232 |
| N | 0.735736 | -1.041035 | -0.000076 |

-----

## Statistical Thermodynamic Analysis

Temperature= 298.150 Kelvin Pressure= 1.00000 Atm  
 =====

SCF Energy= -568.356792065 Predicted Change= -7.293026D-07  
 Zero-point correction (ZPE)= -568.3145 0.04225  
 Internal Energy (U)= -568.3105 0.04624  
 Enthalpy (H)= -568.3096 0.04718  
 Gibbs Free Energy (G)= -568.3423 0.01448  
 -----

Frequencies -- 453.3436 530.9961 576.4957



Supporting Information: **4bromoisothiazole.out**

-----  
 Using Gaussian 03: IA32L-G03RevC.02 12-Jun-2004  
 =====

# opt freq b3lyp/6-31g(d) geom=connectivity  
 #N Geom=AllCheck Guess=Read SCRF=Check GenChk RB3LYP/6-31G(d) Freq  
 -----

Pointgroup= C1 Stoichiometry= C3H2BrNS C1[X(C3H2BrNS)] #Atoms= 8  
 Charge = 0 Multiplicity = 1  
 -----

SCF Energy= -3140.14123357 Predicted Change= -4.412135D-07  
 =====

Optimization completed. {Found 1 times}  
 Item Max Val. Criteria Pass? RMS Val. Criteria Pass?  
 Force 0.00014 || 0.00045 [ YES ] 0.00006 || 0.00030 [ YES ]  
 Displ 0.00300 || 0.00180 [ NO ] 0.00300 || 0.00180 [ YES ]  
 -----

Atomic Coordinates (Angstroms)  
 Type X Y Z  
 -----

|    |           |           |           |
|----|-----------|-----------|-----------|
| C  | -0.766276 | 1.251794  | 0.000025  |
| C  | -0.027869 | 0.030312  | 0.000031  |
| C  | -0.860020 | -1.054891 | 0.000188  |
| S  | -2.486815 | -0.489609 | -0.000103 |
| H  | -0.315661 | 2.239830  | -0.000020 |
| H  | -0.595467 | -2.103479 | 0.000274  |
| N  | -2.075963 | 1.142878  | 0.000097  |
| Br | 1.861626  | -0.047601 | -0.000022 |

-----

## Statistical Thermodynamic Analysis

Temperature= 298.150 Kelvin Pressure= 1.00000 Atm  
 =====

SCF Energy= -3140.14123357 Predicted Change= -4.412135D-07  
 Zero-point correction (ZPE)= -3140.0958 0.04538  
 Internal Energy (U)= -3140.0906 0.05060  
 Enthalpy (H)= -3140.0896 0.05154  
 Gibbs Free Energy (G)= -3140.1264 0.01476  
 -----

Frequencies -- 197.0318 236.2905 321.0358

Supporting Information: **4bromoisothiazoleradical.out**

-----  
 Using Gaussian 03: IA32L-G03RevC.02 12-Jun-2004  
 =====

# opt nosymm freq ub3lyp/6-31g(d) geom=connectivity  
 #N Geom=AllCheck Guess=Read SCRF=Check GenChk UB3LYP/6-31G(d) Freq  
 -----

Pointgroup= C1 Stoichiometry= C3H2NS(2) C1[X(C3H2NS)] #Atoms= 7  
 Charge = 0 Multiplicity = 2  
 -----

SCF Energy= -568.346962529 Predicted Change= -6.172710D-07  
 =====

Optimization completed. {Found 2 times}  
 Item Max Val. Criteria Pass? RMS Val. Criteria Pass?  
 Force 0.00025 || 0.00045 [ YES ] 0.00011 || 0.00030 [ YES ]  
 Displ 0.00143 || 0.00180 [ YES ] 0.00143 || 0.00180 [ YES ]  
 -----

Atomic Coordinates (Angstroms)  
 Type X Y Z  
 -----

|   |           |           |           |
|---|-----------|-----------|-----------|
| C | -0.756449 | 1.262543  | -0.000016 |
| C | -0.057754 | 0.030087  | 0.000121  |
| C | -0.847956 | -1.068756 | 0.000136  |
| S | -2.487778 | -0.489902 | 0.000007  |
| H | -0.314501 | 2.253176  | 0.000004  |
| H | -0.591208 | -2.119411 | 0.000230  |
| N | -2.072425 | 1.149097  | 0.000009  |

-----

## Statistical Thermodynamic Analysis

Temperature= 298.150 Kelvin Pressure= 1.00000 Atm  
 =====

SCF Energy= -568.346962529 Predicted Change= -6.172710D-07  
 Zero-point correction (ZPE)= -568.3043 0.04261  
 Internal Energy (U)= -568.3004 0.04649  
 Enthalpy (H)= -568.2995 0.04743  
 Gibbs Free Energy (G)= -568.3320 0.01490  
 -----

Frequencies -- 460.1075 571.7673 619.8656

Supporting Information: **5bromo3radicalisothiazole.out**

-----  
 Using Gaussian 03: IA32L-G03RevC.02 12-Jun-2004  
 =====

# opt nosymm freq ub3lyp/6-31g(d)  
 #N Geom=AllCheck Guess=Read SCRF=Check GenChk UB3LYP/6-31G(d) Freq  
 -----

Pointgroup= C1 Stoichiometry= C3HBrNS(2) C1[X(C3HBrNS)] #Atoms= 7  
 Charge = 0 Multiplicity = 2  
 -----

SCF Energy= -3139.45582221 Predicted Change= -1.578645D-07  
 =====

Optimization completed. {Found 2 times}  
 Item Max Val. Criteria Pass? RMS Val. Criteria Pass?  
 Force 0.00019 || 0.00045 [ YES ] 0.00005 || 0.00030 [ YES ]  
 Displ 0.00059 || 0.00180 [ YES ] 0.00059 || 0.00180 [ YES ]  
 -----

Atomic Coordinates (Angstroms)  
 Type X Y Z  
 -----

|    |           |           |           |
|----|-----------|-----------|-----------|
| C  | 1.154852  | 0.227847  | 0.000112  |
| C  | 0.061836  | -0.683537 | 0.000049  |
| C  | -1.081651 | 0.072356  | 0.000036  |
| S  | -0.721788 | 1.774476  | -0.000062 |
| H  | 0.113367  | -1.762864 | 0.000049  |
| N  | 0.992429  | 1.486477  | 0.000138  |
| Br | -2.856606 | -0.544765 | -0.000027 |

-----

## Statistical Thermodynamic Analysis

Temperature= 298.150 Kelvin Pressure= 1.00000 Atm  
 =====

SCF Energy= -3139.45582221 Predicted Change= -1.578645D-07  
 Zero-point correction (ZPE)= -3139.4234 0.03237  
 Internal Energy (U)= -3139.4181 0.03770  
 Enthalpy (H)= -3139.4171 0.03864  
 Gibbs Free Energy (G)= -3139.4547 0.00106  
 -----

Frequencies -- 202.0397 207.8287 330.6706

Supporting Information: **5bromoisothiazole.out**

-----  
 Using Gaussian 03: IA32L-G03RevC.02 12-Jun-2004  
 =====

# opt=(modredundant) freq b3lyp/6-31g(d) geom=connectivity  
 #N Geom=AllCheck Guess=Read SCRF=Check GenChk RB3LYP/6-31G(d) Freq  
 -----

Pointgroup= C1 Stoichiometry= C3H2BrNS C1[X(C3H2BrNS)] #Atoms= 8  
 Charge = 0 Multiplicity = 1  
 -----

SCF Energy= -3140.13901885 Predicted Change= -1.833729D-07  
 =====

Optimization completed. {Found 2 times}  
 Item Max Val. Criteria Pass? RMS Val. Criteria Pass?  
 Force 0.00009 || 0.00045 [ YES ] 0.00003 || 0.00030 [ YES ]  
 Displ 0.00131 || 0.00180 [ YES ] 0.00131 || 0.00180 [ YES ]  
 -----

Atomic Coordinates (Angstroms)  
 Type X Y Z  
 -----

|    |           |           |           |
|----|-----------|-----------|-----------|
| C  | -2.257950 | 1.041430  | 0.000191  |
| C  | -0.868458 | 1.355405  | 0.000053  |
| C  | -0.140284 | 0.195384  | -0.000055 |
| S  | -1.205140 | -1.168027 | 0.000160  |
| H  | -3.053045 | 1.782596  | 0.000221  |
| H  | -0.446306 | 2.352165  | 0.000132  |
| N  | -2.600518 | -0.232068 | -0.000450 |
| Br | 1.731011  | 0.017852  | -0.000026 |

-----

## Statistical Thermodynamic Analysis

Temperature= 298.150 Kelvin Pressure= 1.00000 Atm  
 =====

SCF Energy= -3140.13901885 Predicted Change= -1.833729D-07  
 Zero-point correction (ZPE)= -3140.0936 0.04538  
 Internal Energy (U)= -3140.0883 0.05062  
 Enthalpy (H)= -3140.0874 0.05156  
 Gibbs Free Energy (G)= -3140.1242 0.01473  
 -----

Frequencies -- 200.3325 207.1558 333.2966

Supporting Information: **5bromoisothiazoleradical.out**

-----  
 Using Gaussian 03: IA32L-G03RevC.02 12-Jun-2004  
 =====

# opt nosymm freq ub3lyp/6-31g(d) geom=connectivity  
 #N Geom=AllCheck Guess=Read SCRF=Check GenChk UB3LYP/6-31G(d) Freq  
 -----

Pointgroup= C1 Stoichiometry= C3H2NS(2) C1[X(C3H2NS)] #Atoms= 7  
 Charge = 0 Multiplicity = 2  
 -----

SCF Energy= -568.345614613 Predicted Change= -3.627959D-07  
 =====

Optimization completed. {Found 2 times}  
 Item Max Val. Criteria Pass? RMS Val. Criteria Pass?  
 Force 0.00029 || 0.00045 [ YES ] 0.00007 || 0.00030 [ YES ]  
 Displ 0.00059 || 0.00180 [ YES ] 0.00059 || 0.00180 [ YES ]  
 -----

Atomic Coordinates (Angstroms)  
 Type X Y Z  
 -----

|   |           |           |           |
|---|-----------|-----------|-----------|
| C | -2.254235 | 1.044725  | -0.000034 |
| C | -0.861327 | 1.364787  | 0.000045  |
| C | -0.174702 | 0.187841  | 0.000198  |
| S | -1.189059 | -1.179199 | -0.000341 |
| H | -3.055882 | 1.779303  | 0.000031  |
| H | -0.437394 | 2.360843  | 0.000173  |
| N | -2.599101 | -0.231415 | 0.000179  |

-----

## Statistical Thermodynamic Analysis

Temperature= 298.150 Kelvin Pressure= 1.00000 Atm  
 =====

SCF Energy= -568.345614613 Predicted Change= -3.627959D-07  
 Zero-point correction (ZPE)= -568.3029 0.04268  
 Internal Energy (U)= -568.2990 0.04656  
 Enthalpy (H)= -568.2981 0.04751  
 Gibbs Free Energy (G)= -568.3306 0.01496  
 -----

Frequencies -- 434.5454 586.4190 611.3530

**Bromoisoxazoles**Supporting Information: **3bromoisoxazole.out**-----  
Using Gaussian 03: IA32L-G03RevC.02 12-Jun-2004  
=====# opt=(modredundant) freq b3lyp/6-31g(d) geom=connectivity  
#N Geom=AllCheck Guess=Read SCRF=Check GenChk RB3LYP/6-31G(d) Freq  
-----Pointgroup= C1 Stoichiometry= C3H2ClNO C1[X(C3H2ClNO)] #Atoms= 8  
Charge = 0 Multiplicity = 1  
-----SCF Energy= -705.625326811 Predicted Change= -1.885277D-07  
=====Optimization completed. {Found 2 times}  
Item Max Val. Criteria Pass? RMS Val. Criteria Pass?  
Force 0.00016 || 0.00045 [ YES ] 0.00005 || 0.00030 [ YES ]  
Displ 0.00099 || 0.00180 [ YES ] 0.00099 || 0.00180 [ YES ]  
-----Atomic Coordinates (Angstroms)  
Type X Y Z  
-----

|    |           |           |           |
|----|-----------|-----------|-----------|
| C  | -1.846532 | 0.591647  | 0.000019  |
| C  | -0.609007 | 1.150837  | 0.000027  |
| C  | 0.240395  | 0.008186  | -0.000033 |
| H  | -2.848566 | 0.996867  | -0.000022 |
| H  | -0.326345 | 2.191586  | 0.000003  |
| N  | -0.413497 | -1.129232 | 0.000234  |
| O  | -1.758685 | -0.752195 | -0.000059 |
| Cl | 1.966455  | 0.013512  | -0.000073 |

-----  
Statistical Thermodynamic AnalysisTemperature= 298.150 Kelvin Pressure= 1.00000 Atm  
=====SCF Energy= -705.625326811 Predicted Change= -1.885277D-07  
Zero-point correction (ZPE)= -705.5766 0.04869  
Internal Energy (U)= -705.5720 0.05328  
Enthalpy (H)= -705.5710 0.05423  
Gibbs Free Energy (G)= -705.6052 0.02008  
-----

Frequencies -- 258.8084 313.7286 488.2311

Supporting Information: **4bromoisoxazole.out**

-----  
 Using Gaussian 03: IA32L-G03RevC.02 12-Jun-2004  
 =====

# opt=(modredundant) freq b3lyp/6-31g(d) geom=connectivity  
 #N Geom=AllCheck Guess=Read SCRF=Check GenChk RB3LYP/6-31G(d) Freq  
 -----

Pointgroup= C1 Stoichiometry= C3H2ClNO C1[X(C3H2ClNO)] #Atoms= 8  
 Charge = 0 Multiplicity = 1  
 -----

SCF Energy= -705.622973921 Predicted Change= -1.166850D-08  
 =====

Optimization completed. {Found 2 times}  
 Item Max Val. Criteria Pass? RMS Val. Criteria Pass?  
 Force 0.00004 || 0.00045 [ YES ] 0.00001 || 0.00030 [ YES ]  
 Displ 0.00021 || 0.00180 [ YES ] 0.00021 || 0.00180 [ YES ]  
 -----

Atomic Coordinates (Angstroms)  
 Type X Y Z  
 -----

|    |           |           |           |
|----|-----------|-----------|-----------|
| C  | 0.564573  | -1.086214 | 0.000008  |
| C  | -0.270205 | -0.010992 | -0.000012 |
| C  | 0.608347  | 1.108612  | 0.000054  |
| H  | 0.402400  | -2.153820 | 0.000003  |
| N  | 1.865276  | 0.736508  | -0.000003 |
| H  | 0.356299  | 2.161037  | 0.000069  |
| O  | 1.839790  | -0.663035 | 0.000080  |
| Cl | -1.997074 | 0.004298  | -0.000058 |

-----

## Statistical Thermodynamic Analysis

Temperature= 298.150 Kelvin Pressure= 1.00000 Atm  
 =====

SCF Energy= -705.622973921 Predicted Change= -1.166850D-08  
 Zero-point correction (ZPE)= -705.5741 0.04879  
 Internal Energy (U)= -705.5695 0.05341  
 Enthalpy (H)= -705.5686 0.05435  
 Gibbs Free Energy (G)= -705.6028 0.02009  
 -----

Frequencies -- 255.9066 290.1389 482.7155

Supporting Information: **5bromoisoxazole.out**

-----  
 Using Gaussian 03: IA32L-G03RevC.02 12-Jun-2004  
 =====

# opt=(modredundant) freq b3lyp/6-31g(d) geom=connectivity  
 #N Geom=AllCheck Guess=Read SCRF=Check GenChk RB3LYP/6-31G(d) Freq  
 -----

Pointgroup= C1 Stoichiometry= C3H2ClNO C1[X(C3H2ClNO)] #Atoms= 8  
 Charge = 0 Multiplicity = 1  
 -----

SCF Energy= -705.624900368 Predicted Change= -6.566954D-08  
 =====

Optimization completed. {Found 2 times}  
 Item Max Val. Criteria Pass? RMS Val. Criteria Pass?  
 Force 0.00008 || 0.00045 [ YES ] 0.00003 || 0.00030 [ YES ]  
 Displ 0.00042 || 0.00180 [ YES ] 0.00042 || 0.00180 [ YES ]  
 -----

Atomic Coordinates (Angstroms)  
 Type X Y Z  
 -----

|    |           |           |           |
|----|-----------|-----------|-----------|
| C  | -0.233558 | 0.097069  | -0.000012 |
| C  | 0.617847  | 1.159969  | -0.000078 |
| C  | 1.890486  | 0.528082  | 0.000113  |
| H  | 0.374835  | 2.210633  | -0.000133 |
| N  | 1.811727  | -0.783135 | -0.000136 |
| H  | 2.870458  | 0.989373  | 0.000173  |
| O  | 0.434178  | -1.065753 | 0.000096  |
| Cl | -1.944086 | 0.005720  | 0.000001  |

-----

## Statistical Thermodynamic Analysis

Temperature= 298.150 Kelvin Pressure= 1.00000 Atm  
 =====

SCF Energy= -705.624900368 Predicted Change= -6.566954D-08  
 Zero-point correction (ZPE)= -705.5762 0.04867  
 Internal Energy (U)= -705.5716 0.05327  
 Enthalpy (H)= -705.5706 0.05422  
 Gibbs Free Energy (G)= -705.6048 0.02003  
 -----

Frequencies -- 235.4618 309.7176 493.1690



**Bromopyrazoles**Supporting Information: **3bromopyrazole.out**-----  
Using Gaussian 03: IA32L-G03RevC.02 12-Jun-2004  
=====# opt=(modredundant) freq b3lyp/6-31g(d) geom=connectivity  
#N Geom=AllCheck Guess=Read SCRF=Check GenChk RB3LYP/6-31G(d) Freq  
-----Pointgroup= C1 Stoichiometry= C3H3BrN2 C1[X(C3H3BrN2)] #Atoms= 9  
Charge = 0 Multiplicity = 1  
-----SCF Energy= -2797.29971329 Predicted Change= -1.986769D-07  
=====Optimization completed. {Found 2 times}  
Item Max Val. Criteria Pass? RMS Val. Criteria Pass?  
Force 0.00019 || 0.00045 [ YES ] 0.00005 || 0.00030 [ YES ]  
Displ 0.00062 || 0.00180 [ YES ] 0.00062 || 0.00180 [ YES ]  
-----Atomic Coordinates (Angstroms)  
Type X Y Z  
-----

|    |           |           |           |
|----|-----------|-----------|-----------|
| C  | 2.439812  | 0.649055  | 0.000040  |
| C  | 1.159071  | 1.164575  | 0.000080  |
| C  | 0.336184  | 0.016646  | -0.000005 |
| N  | 2.307916  | -0.703030 | -0.000008 |
| H  | 3.037323  | -1.400122 | -0.000092 |
| H  | 3.407897  | 1.129505  | 0.000078  |
| H  | 0.854442  | 2.199426  | 0.000147  |
| Br | -1.549087 | -0.004570 | -0.000014 |
| N  | 1.021793  | -1.118471 | -0.000039 |

-----  
Statistical Thermodynamic AnalysisTemperature= 298.150 Kelvin Pressure= 1.00000 Atm  
=====SCF Energy= -2797.29971329 Predicted Change= -1.986769D-07  
Zero-point correction (ZPE)= -2797.2383 0.06137  
Internal Energy (U)= -2797.2333 0.06637  
Enthalpy (H)= -2797.2323 0.06731  
Gibbs Free Energy (G)= -2797.2681 0.03155  
-----

Frequencies -- 232.5142 267.2021 361.1142

Supporting Information: **4bromopyrazole.out**

-----  
 Using Gaussian 03: IA32L-G03RevC.02 12-Jun-2004  
 =====

# opt=(modredundant) freq b3lyp/6-31g(d) geom=connectivity  
 #N Geom=AllCheck Guess=Read SCRF=Check GenChk RB3LYP/6-31G(d) Freq  
 -----

Pointgroup= C1 Stoichiometry= C3H3BrN2 C1[X(C3H3BrN2)] #Atoms= 9  
 Charge = 0 Multiplicity = 1  
 -----

SCF Energy= -2797.29884363 Predicted Change= -4.647472D-07  
 =====

Optimization completed. {Found 1 times}  
 Item Max Val. Criteria Pass? RMS Val. Criteria Pass?  
 Force 0.00020 || 0.00045 [ YES ] 0.00006 || 0.00030 [ YES ]  
 Displ 0.00287 || 0.00180 [ NO ] 0.00287 || 0.00180 [ YES ]  
 -----

Atomic Coordinates (Angstroms)  
 Type X Y Z  
 -----

|    |           |           |           |
|----|-----------|-----------|-----------|
| C  | 1.147353  | -1.098676 | 0.000103  |
| C  | 0.314484  | 0.002481  | 0.000015  |
| C  | 1.168966  | 1.126364  | 0.000140  |
| N  | 2.407060  | -0.592894 | 0.000130  |
| H  | 3.276874  | -1.104593 | 0.000228  |
| H  | 0.936957  | -2.157545 | 0.000107  |
| N  | 2.448045  | 0.756615  | 0.000016  |
| H  | 0.897967  | 2.172895  | 0.000161  |
| Br | -1.568067 | -0.006795 | -0.000088 |

-----

## Statistical Thermodynamic Analysis

Temperature= 298.150 Kelvin Pressure= 1.00000 Atm  
 =====

SCF Energy= -2797.29884363 Predicted Change= -4.647472D-07  
 Zero-point correction (ZPE)= -2797.2371 0.06166  
 Internal Energy (U)= -2797.2321 0.06666  
 Enthalpy (H)= -2797.2312 0.06761  
 Gibbs Free Energy (G)= -2797.2670 0.03178  
 -----

Frequencies -- 230.5690 246.6880 360.2236

Supporting Information: **5bromopyrazole.out**

-----  
 Using Gaussian 03: IA32L-G03RevC.02 12-Jun-2004  
 =====

# opt=(modredundant) freq b3lyp/6-31g(d) geom=connectivity  
 #N Geom=AllCheck Guess=Read SCRF=Check GenChk RB3LYP/6-31G(d) Freq  
 -----

Pointgroup= C1 Stoichiometry= C3H3BrN2 C1[X(C3H3BrN2)] #Atoms= 9  
 Charge = 0 Multiplicity = 1  
 -----

SCF Energy= -2797.29868277 Predicted Change= -1.667967D-07  
 =====

Optimization completed. {Found 2 times}  
 Item Max Val. Criteria Pass? RMS Val. Criteria Pass?  
 Force 0.00015 || 0.00045 [ YES ] 0.00004 || 0.00030 [ YES ]  
 Displ 0.00075 || 0.00180 [ YES ] 0.00075 || 0.00180 [ YES ]  
 -----

Atomic Coordinates (Angstroms)  
 Type X Y Z  
 -----

|    |           |           |           |
|----|-----------|-----------|-----------|
| C  | 0.336076  | 0.091012  | 0.000003  |
| C  | 1.197693  | 1.168347  | -0.000096 |
| C  | 2.478666  | 0.571088  | 0.000087  |
| N  | 1.096809  | -1.032120 | 0.000054  |
| H  | 0.776321  | -1.989297 | 0.000153  |
| H  | 0.934937  | 2.214909  | -0.000183 |
| N  | 2.419868  | -0.761116 | -0.000039 |
| H  | 3.443499  | 1.061027  | 0.000135  |
| Br | -1.538460 | 0.008095  | -0.000005 |

-----

## Statistical Thermodynamic Analysis

Temperature= 298.150 Kelvin Pressure= 1.00000 Atm  
 =====

SCF Energy= -2797.29868277 Predicted Change= -1.667967D-07  
 Zero-point correction (ZPE)= -2797.2371 0.06152  
 Internal Energy (U)= -2797.2321 0.06653  
 Enthalpy (H)= -2797.2312 0.06747  
 Gibbs Free Energy (G)= -2797.2670 0.03165  
 -----

Frequencies -- 218.3256 250.4084 364.0731

Supporting Information: **3bromopyridazine.out**

-----  
 Using Gaussian 03: IA32L-G03RevC.02 12-Jun-2004  
 =====

# opt=(modredundant) freq b3lyp/6-31g(d) geom=connectivity  
 #N Geom=AllCheck Guess=Read SCRF=Check GenChk RB3LYP/6-31G(d) Freq  
 -----

Pointgroup= C1 Stoichiometry= C4H3BrN2 C1[X(C4H3BrN2)] #Atoms= 10  
 Charge = 0 Multiplicity = 1  
 -----

SCF Energy= -2835.39052316 Predicted Change= -9.007250D-08  
 =====

Optimization completed. {Found 2 times}  
 Item Max Val. Criteria Pass? RMS Val. Criteria Pass?  
 Force 0.00015 || 0.00045 [ YES ] 0.00003 || 0.00030 [ YES ]  
 Displ 0.00066 || 0.00180 [ YES ] 0.00066 || 0.00180 [ YES ]  
 -----

Atomic Coordinates (Angstroms)  
 Type X Y Z  
 -----

|    |           |           |           |
|----|-----------|-----------|-----------|
| N  | -0.719549 | -1.192695 | -0.000010 |
| C  | -0.139486 | -0.004677 | -0.000019 |
| C  | -0.819827 | 1.219899  | -0.000003 |
| C  | -2.199456 | 1.143001  | 0.000006  |
| C  | -2.770641 | -0.136357 | 0.000006  |
| N  | -2.058019 | -1.263050 | 0.000001  |
| H  | -0.281534 | 2.160891  | 0.000002  |
| H  | -2.819783 | 2.034340  | 0.000013  |
| H  | -3.848382 | -0.275990 | 0.000011  |
| Br | 1.770547  | -0.001721 | 0.000003  |

-----

## Statistical Thermodynamic Analysis

Temperature= 298.150 Kelvin Pressure= 1.00000 Atm  
 =====

SCF Energy= -2835.39052316 Predicted Change= -9.007250D-08  
 Zero-point correction (ZPE)= -2835.3244 0.06604  
 Internal Energy (U)= -2835.3189 0.07158  
 Enthalpy (H)= -2835.3179 0.07252  
 Gibbs Free Energy (G)= -2835.3552 0.03523  
 -----

Frequencies -- 163.4262 261.0699 318.1479

**Bromopyridazines**Supporting Information: 3 **radicalpyridazine.out**-----  
Using Gaussian 03: IA32L-G03RevC.02 12-Jun-2004  
=====# opt nosymm freq ub3lyp/6-31g(d) geom=connectivity  
#N Geom=AllCheck Guess=Read SCRF=Check GenChk UB3LYP/6-31G(d) Freq  
-----Pointgroup= C1 Stoichiometry= C4H3N2(2) C1[X(C4H3N2)] #Atoms= 9  
Charge = 0 Multiplicity = 2  
-----SCF Energy= -263.606126723 Predicted Change= -1.012490D-06  
=====Optimization completed. {Found 2 times}  
Item Max Val. Criteria Pass? RMS Val. Criteria Pass?  
Force 0.00031 || 0.00045 [ YES ] 0.00010 || 0.00030 [ YES ]  
Displ 0.00158 || 0.00180 [ YES ] 0.00158 || 0.00180 [ YES ]  
-----Atomic Coordinates (Angstroms)  
Type X Y Z  
-----

|   |           |           |           |
|---|-----------|-----------|-----------|
| N | -0.721036 | -1.162306 | -0.000012 |
| C | -0.162457 | -0.012117 | -0.000011 |
| C | -0.805385 | 1.229013  | -0.000002 |
| C | -2.187689 | 1.137415  | 0.000007  |
| C | -2.765504 | -0.146972 | 0.000006  |
| N | -2.076023 | -1.285550 | -0.000003 |
| H | -0.274050 | 2.175025  | -0.000003 |
| H | -2.818802 | 2.022498  | 0.000014  |
| H | -3.845731 | -0.271643 | 0.000012  |

-----  
Statistical Thermodynamic AnalysisTemperature= 298.150 Kelvin Pressure= 1.00000 Atm  
=====SCF Energy= -263.606126723 Predicted Change= -1.012490D-06  
Zero-point correction (ZPE)= -263.5430 0.06307  
Internal Energy (U)= -263.5387 0.06734  
Enthalpy (H)= -263.5378 0.06829  
Gibbs Free Energy (G)= -263.5710 0.03508  
-----

Frequencies -- 352.1354 406.4568 554.2225

Supporting Information: **4bromopyridazine.out**

-----  
 Using Gaussian 03: AM64L-G03RevC.02 12-Jun-2004  
 =====

# opt=(modredundant) freq b3lyp/6-31g(d) geom=connectivity  
 #N Geom=AllCheck Guess=Read SCRF=Check GenChk RB3LYP/6-31G(d) Freq  
 -----

Pointgroup= C1 Stoichiometry= C4H3BrN2 C1[X(C4H3BrN2)] #Atoms= 10  
 Charge = 0 Multiplicity = 1  
 -----

SCF Energy= -2835.39071101 Predicted Change= -8.429398D-08  
 =====

Optimization completed. {Found 2 times}  
 Item Max Val. Criteria Pass? RMS Val. Criteria Pass?  
 Force 0.00018 || 0.00045 [ YES ] 0.00003 || 0.00030 [ YES ]  
 Displ 0.00053 || 0.00180 [ YES ] 0.00053 || 0.00180 [ YES ]  
 -----

Atomic Coordinates (Angstroms)  
 Type X Y Z  
 -----

|    |           |           |           |
|----|-----------|-----------|-----------|
| N  | -2.165942 | -1.212715 | -0.000001 |
| C  | -0.831872 | -1.174184 | -0.000002 |
| C  | -0.110233 | 0.024134  | 0.000000  |
| C  | -0.823003 | 1.207676  | 0.000003  |
| C  | -2.217541 | 1.087240  | 0.000004  |
| N  | -2.868507 | -0.078233 | 0.000001  |
| H  | -0.328146 | -2.136435 | -0.000005 |
| H  | -0.336569 | 2.176953  | 0.000005  |
| H  | -2.850022 | 1.971601  | 0.000006  |
| Br | 1.790051  | 0.004438  | -0.000001 |

-----

## Statistical Thermodynamic Analysis

Temperature= 298.150 Kelvin Pressure= 1.00000 Atm  
 =====

SCF Energy= -2835.39071101 Predicted Change= -8.429398D-08  
 Zero-point correction (ZPE)= -2835.3244 0.06631  
 Internal Energy (U)= -2835.3188 0.07183  
 Enthalpy (H)= -2835.3179 0.07277  
 Gibbs Free Energy (G)= -2835.3552 0.03547  
 -----

Frequencies -- 167.5619 247.1045 314.8327

Supporting Information: **4radicalpyridazine.out**

-----  
 Using Gaussian 03: IA32L-G03RevC.02 12-Jun-2004  
 =====

# opt nosymm freq ub3lyp/6-31g(d) geom=connectivity  
 #N Geom=AllCheck Guess=Read SCRF=Check GenChk UB3LYP/6-31G(d) Freq  
 -----

Pointgroup= C1 Stoichiometry= C4H3N2(2) C1[X(C4H3N2)] #Atoms= 9  
 Charge = 0 Multiplicity = 2  
 -----

SCF Energy= -263.603220839 Predicted Change= -6.438577D-07  
 =====

Optimization completed. {Found 2 times}  
 Item Max Val. Criteria Pass? RMS Val. Criteria Pass?  
 Force 0.00039 || 0.00045 [ YES ] 0.00009 || 0.00030 [ YES ]  
 Displ 0.00105 || 0.00180 [ YES ] 0.00105 || 0.00180 [ YES ]  
 -----

Atomic Coordinates (Angstroms)  
 Type X Y Z  
 -----

|   |           |           |           |
|---|-----------|-----------|-----------|
| N | -2.162488 | -1.199327 | -0.000001 |
| C | -0.808316 | -1.184009 | -0.000001 |
| C | -0.136157 | 0.021192  | 0.000000  |
| C | -0.817076 | 1.207970  | 0.000003  |
| C | -2.222271 | 1.096343  | 0.000004  |
| N | -2.851632 | -0.078950 | 0.000001  |
| H | -0.332963 | -2.159462 | -0.000005 |
| H | -0.340631 | 2.184828  | 0.000005  |
| H | -2.860301 | 1.977453  | 0.000006  |

-----

## Statistical Thermodynamic Analysis

Temperature= 298.150 Kelvin Pressure= 1.00000 Atm  
 =====

SCF Energy= -263.603220839 Predicted Change= -6.438577D-07  
 Zero-point correction (ZPE)= -263.5400 0.06316  
 Internal Energy (U)= -263.5358 0.06735  
 Enthalpy (H)= -263.5349 0.06829  
 Gibbs Free Energy (G)= -263.5680 0.03521  
 -----

Frequencies -- 374.2632 417.2313 599.0696

**Bromopyridines**Supporting Information: **23dibromopyridine.out**-----  
Using Gaussian 03: IA32L-G03RevC.02 12-Jun-2004  
=====

# opt freq b3lyp/6-31g(d)

#N Geom=AllCheck Guess=Read SCRF=Check GenChk RB3LYP/6-31G(d) Freq  
-----

Pointgroup= C1 Stoichiometry= C5H3Br2N C1[X(C5H3Br2N)] #Atoms= 11

Charge = 0 Multiplicity = 1  
-----SCF Energy= -5390.49072273 Predicted Change= -2.183283D-05  
=====

Optimization completed. {Found 1 times}

| Item  | Max Val. | Criteria | Pass?   | RMS Val. | Criteria | Pass?   |
|-------|----------|----------|---------|----------|----------|---------|
| Force | 0.00040  | 0.00045  | [ YES ] | 0.00019  | 0.00030  | [ YES ] |
| Displ | 0.02859  | 0.00180  | [ NO ]  | 0.02859  | 0.00180  | [ NO ]  |

-----  
Atomic Coordinates (Angstroms)  
Type X Y Z  
-----

|    |           |           |           |
|----|-----------|-----------|-----------|
| C  | 0.616199  | 0.667823  | 0.000887  |
| C  | 0.514294  | -0.732566 | 0.000510  |
| C  | 1.695003  | -1.472644 | 0.007920  |
| C  | 2.917010  | -0.802292 | 0.000574  |
| C  | 2.903852  | 0.590164  | -0.007446 |
| N  | 1.771500  | 1.304004  | -0.000686 |
| H  | 1.646291  | -2.556082 | 0.025245  |
| H  | 3.852372  | -1.352824 | -0.002364 |
| H  | 3.827484  | 1.163914  | -0.007006 |
| Br | -0.953709 | 1.760404  | 0.001102  |
| Br | -1.149285 | -1.642860 | -0.001838 |

-----  
Statistical Thermodynamic AnalysisTemperature= 298.150 Kelvin Pressure= 1.00000 Atm  
=====

SCF Energy= -5390.49072273 Predicted Change= -2.183283D-05

Zero-point correction (ZPE)= -5390.4221 0.06860

Internal Energy (U)= -5390.4151 0.07558

Enthalpy (H)= -5390.4141 0.07652

Gibbs Free Energy (G)= -5390.4560 0.03468  
-----

Frequencies -- 109.8182 133.3247 230.8723



Supporting Information: **24dibromopyridine.out**

-----  
 Using Gaussian 03: IA32L-G03RevC.02 12-Jun-2004  
 =====

# opt freq b3lyp/6-31g(d)

#N Geom=AllCheck Guess=Read SCRF=Check GenChk RB3LYP/6-31G(d) Freq

-----  
 Pointgroup= C1 Stoichiometry= C5H3Br2N C1[X(C5H3Br2N)] #Atoms= 11

Charge = 0 Multiplicity = 1

-----  
 SCF Energy= -5390.49361714 Predicted Change= -2.993690D-07  
 =====

Optimization completed. {Found 2 times}

Item Max Val. Criteria Pass? RMS Val. Criteria Pass?

Force 0.00014 || 0.00045 [ YES ] 0.00004 || 0.00030 [ YES ]

Displ 0.00112 || 0.00180 [ YES ] 0.00112 || 0.00180 [ YES ]  
 -----

| Atomic<br>Type | Coordinates (Angstroms) |   |   |
|----------------|-------------------------|---|---|
|                | X                       | Y | Z |

|    |           |           |           |
|----|-----------|-----------|-----------|
| C  | 1.179376  | 0.353919  | -0.000007 |
| C  | -0.000594 | -0.395444 | 0.000001  |
| C  | -1.189721 | 0.325398  | -0.000009 |
| C  | -1.166407 | 1.719720  | 0.000002  |
| C  | 0.081989  | 2.338055  | 0.000009  |
| N  | 1.245356  | 1.671078  | -0.000007 |
| H  | 0.014943  | -1.477235 | 0.000012  |
| H  | -2.081052 | 2.300445  | 0.000009  |
| H  | 0.155268  | 3.423240  | 0.000001  |
| Br | 2.845031  | -0.598550 | 0.000001  |
| Br | -2.851731 | -0.601276 | 0.000000  |

-----  
 Statistical Thermodynamic Analysis

Temperature= 298.150 Kelvin Pressure= 1.00000 Atm  
 =====

SCF Energy= -5390.49361714 Predicted Change= -2.993690D-07

Zero-point correction (ZPE)= -5390.4250 0.06861

Internal Energy (U)= -5390.4180 0.07561

Enthalpy (H)= -5390.4170 0.07655

Gibbs Free Energy (G)= -5390.4591 0.03449  
 -----

Frequencies -- 133.2761 141.1127 190.5185

Supporting Information: **25dibromopyridine.out**

-----  
 Using Gaussian 03: IA32L-G03RevC.02 12-Jun-2004  
 =====

# opt freq b3lyp/6-31g(d)

#N Geom=AllCheck Guess=Read SCRF=Check GenChk RB3LYP/6-31G(d) Freq

-----  
 Pointgroup= C1 Stoichiometry= C5H3Br2N C1[X(C5H3Br2N)] #Atoms= 11

Charge = 0 Multiplicity = 1

-----  
 SCF Energy= -5390.49282725 Predicted Change= -2.616026D-07  
 =====

Optimization completed. {Found 2 times}

Item Max Val. Criteria Pass? RMS Val. Criteria Pass?

Force 0.00015 || 0.00045 [ YES ] 0.00004 || 0.00030 [ YES ]

Displ 0.00068 || 0.00180 [ YES ] 0.00068 || 0.00180 [ YES ]

-----  
 Atomic Coordinates (Angstroms)  
 Type X Y Z

|    |           |           |           |
|----|-----------|-----------|-----------|
| C  | -1.340116 | 0.005787  | -0.000199 |
| C  | -0.702061 | 1.249137  | -0.000114 |
| C  | 0.689595  | 1.256481  | 0.000075  |
| C  | 1.359583  | 0.033093  | 0.000187  |
| C  | 0.622587  | -1.149989 | 0.000115  |
| N  | -0.715895 | -1.156377 | -0.000087 |
| H  | 1.241059  | 2.190774  | 0.000130  |
| H  | -1.272810 | 2.170335  | -0.000198 |
| H  | 1.118750  | -2.116667 | 0.000181  |
| Br | -3.257230 | -0.039275 | -0.000441 |
| Br | 3.261423  | -0.032635 | 0.000444  |

-----  
 Statistical Thermodynamic Analysis

Temperature= 298.150 Kelvin Pressure= 1.00000 Atm

-----  
 SCF Energy= -5390.49282725 Predicted Change= -2.616026D-07

Zero-point correction (ZPE)= -5390.4242 0.06861

Internal Energy (U)= -5390.4171 0.07564

Enthalpy (H)= -5390.4162 0.07658

Gibbs Free Energy (G)= -5390.4583 0.03449

-----  
 Frequencies -- 74.7035 165.8497 214.7240

Supporting Information: **2bromo3radicalpyridine.out**

-----  
 Using Gaussian 03: IA32L-G03RevC.02 12-Jun-2004  
 =====

# opt nosymm freq ub3lyp/6-31g(d)  
 #N Geom=AllCheck Guess=Read SCRF=Check GenChk UB3LYP/6-31G(d) Freq  
 -----

Pointgroup= C1 Stoichiometry= C5H3BrN(2) C1[X(C5H3BrN)] #Atoms= 10  
 Charge = 0 Multiplicity = 2  
 -----

SCF Energy= -2818.70108415 Predicted Change= -3.669131D-07  
 =====

Optimization completed. {Found 2 times}  
 Item Max Val. Criteria Pass? RMS Val. Criteria Pass?  
 Force 0.00014 || 0.00045 [ YES ] 0.00005 || 0.00030 [ YES ]  
 Displ 0.00116 || 0.00180 [ YES ] 0.00116 || 0.00180 [ YES ]  
 -----

Atomic Coordinates (Angstroms)  
 Type X Y Z  
 -----

|    |           |           |           |
|----|-----------|-----------|-----------|
| C  | 0.619589  | 0.683724  | 0.001687  |
| C  | 0.556722  | -0.691255 | 0.008889  |
| C  | 1.681926  | -1.480662 | 0.009626  |
| C  | 2.915440  | -0.807201 | 0.002395  |
| C  | 2.903002  | 0.587705  | -0.004500 |
| N  | 1.781285  | 1.323026  | -0.005334 |
| H  | 1.629013  | -2.566317 | 0.014955  |
| H  | 3.854473  | -1.353262 | 0.002063  |
| H  | 3.833176  | 1.151096  | -0.010983 |
| Br | -0.984329 | 1.723047  | -0.000061 |

## Statistical Thermodynamic Analysis

Temperature= 298.150 Kelvin Pressure= 1.00000 Atm  
 =====

SCF Energy= -2818.70108415 Predicted Change= -3.669131D-07  
 Zero-point correction (ZPE)= -2818.6353 0.06576  
 Internal Energy (U)= -2818.6297 0.07133  
 Enthalpy (H)= -2818.6288 0.07227  
 Gibbs Free Energy (G)= -2818.6667 0.03432  
 -----

Frequencies -- 165.3530 248.6943 313.4093

Supporting Information: **2bromo4radicalpyridine.out**

-----  
 Using Gaussian 03: IA32L-G03RevC.02 12-Jun-2004  
 =====

# opt nosymm freq ub3lyp/6-31g(d)  
 #N Geom=AllCheck Guess=Read SCRF=Check GenChk UB3LYP/6-31G(d) Freq  
 -----

Pointgroup= C1 Stoichiometry= C5H3BrN(2) C1[X(C5H3BrN)] #Atoms= 10  
 Charge = 0 Multiplicity = 2  
 -----

SCF Energy= -2818.70387803 Predicted Change= -2.102449D-07  
 =====

Optimization completed. {Found 2 times}  
 Item Max Val. Criteria Pass? RMS Val. Criteria Pass?  
 Force 0.00025 || 0.00045 [ YES ] 0.00005 || 0.00030 [ YES ]  
 Displ 0.00098 || 0.00180 [ YES ] 0.00098 || 0.00180 [ YES ]  
 -----

Atomic Coordinates (Angstroms)  
 Type X Y Z  
 -----

|    |           |           |           |
|----|-----------|-----------|-----------|
| C  | 1.178236  | 0.348282  | 0.000006  |
| C  | -0.007151 | -0.411164 | 0.000001  |
| C  | -1.151136 | 0.346823  | 0.000003  |
| C  | -1.180877 | 1.723997  | 0.000003  |
| C  | 0.078547  | 2.341791  | -0.000003 |
| N  | 1.234304  | 1.664727  | 0.000001  |
| H  | 0.013670  | -1.494795 | 0.000000  |
| H  | -2.094479 | 2.309697  | 0.000006  |
| H  | 0.159340  | 3.427487  | -0.000001 |
| Br | 2.853734  | -0.596218 | -0.000004 |

-----

## Statistical Thermodynamic Analysis

Temperature= 298.150 Kelvin Pressure= 1.00000 Atm  
 =====

SCF Energy= -2818.70387803 Predicted Change= -2.102449D-07  
 Zero-point correction (ZPE)= -2818.6383 0.06557  
 Internal Energy (U)= -2818.6327 0.07113  
 Enthalpy (H)= -2818.6317 0.07208  
 Gibbs Free Energy (G)= -2818.6697 0.03415  
 -----

Frequencies -- 159.8333 264.5545 309.0655

Supporting Information: **2bromo5radicalpyridine.out**

-----  
 Using Gaussian 03: IA32L-G03RevC.02 12-Jun-2004  
 =====

# opt nosymm freq ub3lyp/6-31g(d)  
 #N Geom=AllCheck Guess=Read SCRF=Check GenChk UB3LYP/6-31G(d) Freq  
 -----

Pointgroup= C1 Stoichiometry= C5H3BrN(2) C1[X(C5H3BrN)] #Atoms= 10  
 Charge = 0 Multiplicity = 2  
 -----

SCF Energy= -2818.70092136 Predicted Change= -1.002202D-07  
 =====

Optimization completed. {Found 2 times}  
 Item Max Val. Criteria Pass? RMS Val. Criteria Pass?  
 Force 0.00011 || 0.00045 [ YES ] 0.00003 || 0.00030 [ YES ]  
 Displ 0.00042 || 0.00180 [ YES ] 0.00042 || 0.00180 [ YES ]  
 -----

Atomic Coordinates (Angstroms)  
 Type X Y Z  
 -----

|    |           |           |           |
|----|-----------|-----------|-----------|
| C  | -1.331070 | 0.007142  | -0.000197 |
| C  | -0.702381 | 1.257454  | -0.000109 |
| C  | 0.696969  | 1.263952  | 0.000073  |
| C  | 1.320778  | 0.033604  | 0.000179  |
| C  | 0.637111  | -1.162244 | 0.000149  |
| N  | -0.713797 | -1.157923 | -0.000078 |
| H  | 1.248011  | 2.200759  | 0.000125  |
| H  | -1.280685 | 2.174814  | -0.000198 |
| H  | 1.121448  | -2.134326 | 0.000156  |
| Br | -3.252922 | -0.039933 | -0.000451 |

-----

## Statistical Thermodynamic Analysis

Temperature= 298.150 Kelvin Pressure= 1.00000 Atm  
 =====

SCF Energy= -2818.70092136 Predicted Change= -1.002202D-07  
 Zero-point correction (ZPE)= -2818.6351 0.06576  
 Internal Energy (U)= -2818.6295 0.07133  
 Enthalpy (H)= -2818.6286 0.07227  
 Gibbs Free Energy (G)= -2818.6665 0.03434  
 -----

Frequencies -- 174.8934 260.7968 312.0977

Supporting Information: **2bromopyridine.out**

-----  
 Using Gaussian 03: IA32L-G03RevC.02 12-Jun-2004  
 =====

# opt freq b3lyp/6-31g(d)  
 #N Geom=AllCheck Guess=Read SCRF=Check GenChk RB3LYP/6-31G(d) Freq  
 -----

Pointgroup= C1 Stoichiometry= C5H4BrN C1[X(C5H4BrN)] #Atoms= 11  
 Charge = 0 Multiplicity = 1  
 -----

SCF Energy= -2819.39074384 Predicted Change= -1.983810D-07  
 =====

Optimization completed. {Found 2 times}  
 Item Max Val. Criteria Pass? RMS Val. Criteria Pass?  
 Force 0.00014 || 0.00045 [ YES ] 0.00004 || 0.00030 [ YES ]  
 Displ 0.00056 || 0.00180 [ YES ] 0.00056 || 0.00180 [ YES ]  
 -----

Atomic Coordinates (Angstroms)  
 Type X Y Z  
 -----

|    |           |           |           |
|----|-----------|-----------|-----------|
| C  | 0.133472  | -0.015363 | -0.000018 |
| C  | 0.799322  | 1.213140  | 0.000091  |
| C  | 2.191340  | 1.178990  | 0.000295  |
| C  | 2.842180  | -0.056834 | 0.000415  |
| C  | 2.062775  | -1.211414 | 0.000349  |
| N  | 0.720765  | -1.195209 | 0.000113  |
| H  | 2.757505  | 2.106386  | 0.000359  |
| H  | 0.246417  | 2.145085  | 0.000003  |
| H  | 3.925395  | -0.125069 | 0.000561  |
| H  | 2.523249  | -2.197060 | 0.000401  |
| Br | -1.790642 | -0.006114 | -0.000254 |

## Statistical Thermodynamic Analysis

Temperature= 298.150 Kelvin Pressure= 1.00000 Atm  
 =====

SCF Energy= -2819.39074384 Predicted Change= -1.983810D-07  
 Zero-point correction (ZPE)= -2819.3119 0.07879  
 Internal Energy (U)= -2819.3063 0.08438  
 Enthalpy (H)= -2819.3054 0.08533  
 Gibbs Free Energy (G)= -2819.3427 0.04796  
 -----

Frequencies -- 162.0978 261.9157 309.3662

Supporting Information: **3bromo2radicalpyridine.out**

-----  
 Using Gaussian 03: IA32L-G03RevC.02 12-Jun-2004  
 =====

# opt nosymm freq ub3lyp/6-31g(d)  
 #N Geom=AllCheck Guess=Read SCRF=Check GenChk UB3LYP/6-31G(d) Freq  
 -----

Pointgroup= C1 Stoichiometry= C5H3BrN(2) C1[X(C5H3BrN)] #Atoms= 10  
 Charge = 0 Multiplicity = 2  
 -----

SCF Energy= -2818.70799774 Predicted Change= -2.861610D-07  
 =====

Optimization completed. {Found 2 times}  
 Item Max Val. Criteria Pass? RMS Val. Criteria Pass?  
 Force 0.00014 || 0.00045 [ YES ] 0.00005 || 0.00030 [ YES ]  
 Displ 0.00121 || 0.00180 [ YES ] 0.00121 || 0.00180 [ YES ]  
 -----

Atomic Coordinates (Angstroms)  
 Type X Y Z  
 -----

|    |           |           |           |
|----|-----------|-----------|-----------|
| C  | 0.639133  | 0.636478  | -0.003710 |
| C  | 0.512034  | -0.744786 | 0.002603  |
| C  | 1.696220  | -1.481400 | 0.006103  |
| C  | 2.916725  | -0.793550 | 0.002989  |
| C  | 2.914121  | 0.598178  | -0.003828 |
| N  | 1.750377  | 1.282313  | -0.006934 |
| H  | 1.665946  | -2.566953 | 0.011131  |
| H  | 3.854970  | -1.339659 | 0.005888  |
| H  | 3.832829  | 1.177990  | -0.006548 |
| Br | -1.187635 | -1.601975 | 0.008102  |

## Statistical Thermodynamic Analysis

Temperature= 298.150 Kelvin Pressure= 1.00000 Atm  
 =====

SCF Energy= -2818.70799774 Predicted Change= -2.861610D-07  
 Zero-point correction (ZPE)= -2818.6419 0.06603  
 Internal Energy (U)= -2818.6363 0.07160  
 Enthalpy (H)= -2818.6354 0.07255  
 Gibbs Free Energy (G)= -2818.6734 0.03457  
 -----

Frequencies -- 171.8949 244.5095 319.2238

Supporting Information: **3bromopyridine.out**

-----  
 Using Gaussian 03: IA32L-G03RevC.02 12-Jun-2004  
 =====

# opt freq b3lyp/6-31g(d)

#N Geom=AllCheck Guess=Read SCRF=Check GenChk RB3LYP/6-31G(d) Freq

-----  
 Pointgroup= C1 Stoichiometry= C5H4BrN C1[X(C5H4BrN)] #Atoms= 11

Charge = 0 Multiplicity = 1  
 -----

SCF Energy= -2819.38859374 Predicted Change= -3.799676D-08  
 =====

Optimization completed. {Found 2 times}

Item Max Val. Criteria Pass? RMS Val. Criteria Pass?

Force 0.00006 || 0.00045 [ YES ] 0.00002 || 0.00030 [ YES ]

Displ 0.00036 || 0.00180 [ YES ] 0.00036 || 0.00180 [ YES ]  
 -----

| Atomic<br>Type | Coordinates (Angstroms) |   |   |
|----------------|-------------------------|---|---|
|                | X                       | Y | Z |

|    |           |           |           |
|----|-----------|-----------|-----------|
| C  | 0.811869  | -1.192560 | -0.000048 |
| C  | 0.111842  | 0.015544  | 0.000011  |
| C  | 0.811151  | 1.219034  | 0.000235  |
| C  | 2.204052  | 1.159371  | 0.000385  |
| C  | 2.821695  | -0.092117 | 0.000282  |
| N  | 2.146864  | -1.248311 | 0.000083  |
| H  | 0.283342  | 2.167009  | 0.000285  |
| H  | 0.275950  | -2.138803 | -0.000231 |
| H  | 2.797630  | 2.068810  | 0.000580  |
| H  | 3.906934  | -0.172605 | 0.000416  |
| Br | -1.795873 | 0.004518  | -0.000195 |

-----  
 Statistical Thermodynamic Analysis

Temperature= 298.150 Kelvin Pressure= 1.00000 Atm  
 =====

SCF Energy= -2819.38859374 Predicted Change= -3.799676D-08

Zero-point correction (ZPE)= -2819.3095 0.07900

Internal Energy (U)= -2819.3040 0.08458

Enthalpy (H)= -2819.3030 0.08552

Gibbs Free Energy (G)= -2819.3404 0.04817  
 -----

Frequencies -- 174.8006 248.1191 318.8286



Supporting Information: **4bromo2radicalpyridine.out**-----  
Using Gaussian 03: IA32L-G03RevC.02 12-Jun-2004  
=====

# opt nosymm freq ub3lyp/6-31g(d)

#N Geom=AllCheck Guess=Read SCRF=Check GenChk UB3LYP/6-31G(d) Freq  
-----

Pointgroup= C1 Stoichiometry= C5H3BrN(2) C1[X(C5H3BrN)] #Atoms= 10

Charge = 0 Multiplicity = 2  
-----SCF Energy= -2818.71019547 Predicted Change= -8.596147D-08  
=====

Optimization completed. {Found 2 times}

Item Max Val. Criteria Pass? RMS Val. Criteria Pass?

Force 0.00008 || 0.00045 [ YES ] 0.00002 || 0.00030 [ YES ]

Displ 0.00075 || 0.00180 [ YES ] 0.00075 || 0.00180 [ YES ]  
-----

Atomic Coordinates (Angstroms)

Type X Y Z  
-----

C 1.159970 0.369071 -0.000004

C 0.007828 -0.411933 0.000002

C -1.178223 0.320606 0.000000

C -1.156771 1.720580 0.000003

C 0.080199 2.357417 0.000006

N 1.232424 1.654314 -0.000003

H 0.020032 -1.495017 0.000001

H -2.077342 2.292039 0.000002

H 0.156749 3.441788 0.000001

Br -2.857439 -0.590965 0.000004  
-----

Statistical Thermodynamic Analysis

Temperature= 298.150 Kelvin Pressure= 1.00000 Atm  
=====

SCF Energy= -2818.71019547 Predicted Change= -8.596147D-08

Zero-point correction (ZPE)= -2818.6441 0.06605

Internal Energy (U)= -2818.6385 0.07162

Enthalpy (H)= -2818.6376 0.07256

Gibbs Free Energy (G)= -2818.6755 0.03462  
-----

Frequencies -- 170.7741 255.3885 308.9726

Supporting Information: **4bromopyridine.out**

-----  
 Using Gaussian 03: IA32L-G03RevC.02 12-Jun-2004  
 =====

# opt freq b3lyp/6-31g(d)

#N Geom=AllCheck Guess=Read SCRF=Check GenChk RB3LYP/6-31G(d) Freq

-----  
 Pointgroup= C1 Stoichiometry= C5H4BrN C1[X(C5H4BrN)] #Atoms= 11

Charge = 0 Multiplicity = 1

-----  
 SCF Energy= -2819.38918253 Predicted Change= -4.482856D-08  
 =====

Optimization completed. {Found 2 times}

| Item  | Max Val. | Criteria | Pass?   | RMS Val. | Criteria | Pass?   |
|-------|----------|----------|---------|----------|----------|---------|
| Force | 0.00005  | 0.00045  | [ YES ] | 0.00002  | 0.00030  | [ YES ] |
| Displ | 0.00037  | 0.00180  | [ YES ] | 0.00037  | 0.00180  | [ YES ] |

-----  
 Atomic Coordinates (Angstroms)  
 Type X Y Z

|    |           |           |           |
|----|-----------|-----------|-----------|
| C  | 2.197911  | -1.140277 | 0.000002  |
| C  | 0.802768  | -1.204239 | 0.000003  |
| C  | 0.105176  | 0.000003  | 0.000019  |
| C  | 0.802769  | 1.204240  | 0.000009  |
| C  | 2.197914  | 1.140274  | -0.000014 |
| N  | 2.898266  | -0.000001 | -0.000004 |
| H  | 2.778328  | -2.061349 | -0.000011 |
| H  | 0.285457  | -2.157039 | 0.000002  |
| H  | 0.285465  | 2.157045  | 0.000021  |
| H  | 2.778330  | 2.061347  | 0.000003  |
| Br | -1.801562 | 0.000000  | -0.000003 |

-----  
 Statistical Thermodynamic Analysis

Temperature= 298.150 Kelvin Pressure= 1.00000 Atm

-----  
 SCF Energy= -2819.38918253 Predicted Change= -4.482856D-08

Zero-point correction (ZPE)= -2819.3101 0.07898

Internal Energy (U)= -2819.3046 0.08455

Enthalpy (H)= -2819.3036 0.08549

Gibbs Free Energy (G)= -2819.3410 0.04815

-----  
 Frequencies -- 172.5261 253.7692 312.8977

Supporting Information: **5bromo2radicalpyridine.out**

-----  
 Using Gaussian 03: IA32L-G03RevC.02 12-Jun-2004  
 =====

# opt nosymm freq ub3lyp/6-31g(d)  
 #N Geom=AllCheck Guess=Read SCRF=Check GenChk UB3LYP/6-31G(d) Freq  
 -----

Pointgroup= C1 Stoichiometry= C5H3BrN(2) C1[X(C5H3BrN)] #Atoms= 10  
 Charge = 0 Multiplicity = 2  
 -----

SCF Energy= -2818.70824815 Predicted Change= -1.145992D-07  
 =====

Optimization completed. {Found 2 times}  
 Item Max Val. Criteria Pass? RMS Val. Criteria Pass?  
 Force 0.00009 || 0.00045 [ YES ] 0.00003 || 0.00030 [ YES ]  
 Displ 0.00047 || 0.00180 [ YES ] 0.00047 || 0.00180 [ YES ]  
 -----

Atomic Coordinates (Angstroms)  
 Type X Y Z  
 -----

|    |           |           |           |
|----|-----------|-----------|-----------|
| C  | -1.320483 | 0.003057  | -0.000187 |
| C  | -0.714687 | 1.257530  | -0.000114 |
| C  | 0.681385  | 1.254268  | 0.000074  |
| C  | 1.352672  | 0.025946  | 0.000185  |
| C  | 0.631982  | -1.164597 | 0.000110  |
| N  | -0.715282 | -1.134013 | -0.000087 |
| H  | 1.243407  | 2.183306  | 0.000136  |
| H  | -1.280416 | 2.182934  | -0.000209 |
| H  | 1.123845  | -2.132619 | 0.000182  |
| Br | 3.259693  | -0.025873 | 0.000444  |

-----

## Statistical Thermodynamic Analysis

Temperature= 298.150 Kelvin Pressure= 1.00000 Atm  
 =====

SCF Energy= -2818.70824815 Predicted Change= -1.145992D-07  
 Zero-point correction (ZPE)= -2818.6421 0.06607  
 Internal Energy (U)= -2818.6366 0.07164  
 Enthalpy (H)= -2818.6356 0.07258  
 Gibbs Free Energy (G)= -2818.6735 0.03465  
 -----

Frequencies -- 186.2288 250.1214 320.2949

**Bromopyrimidines**Supporting Information: **24dibromopyrimidine.out**-----  
Using Gaussian 03: AM64L-G03RevC.02 12-Jun-2004  
=====

# opt freq b3lyp/6-31g(d)

#N Geom=AllCheck Guess=Read SCRF=Check GenChk RB3LYP/6-31G(d) Freq

-----  
Pointgroup= C1 Stoichiometry= C4H2Br2N2 C1[X(C4H2Br2N2)] #Atoms= 10Charge = 0 Multiplicity = 1  
-----SCF Energy= -5406.53025356 Predicted Change= -1.356932D-06  
=====

Optimization completed. {Found 2 times}

Item Max Val. Criteria Pass? RMS Val. Criteria Pass?

Force 0.00044 || 0.00045 [ YES ] 0.00012 || 0.00030 [ YES ]

Displ 0.00125 || 0.00180 [ YES ] 0.00125 || 0.00180 [ YES ]  
-----Atomic Coordinates (Angstroms)  
Type X Y Z  
-----

|    |           |           |           |
|----|-----------|-----------|-----------|
| C  | -1.121802 | 0.367320  | 0.000158  |
| N  | -0.001086 | -0.351390 | 0.000073  |
| C  | 1.120536  | 0.348859  | 0.000026  |
| C  | 1.155257  | 1.743275  | 0.000034  |
| C  | -0.089210 | 2.366310  | 0.000033  |
| N  | -1.245434 | 1.687471  | 0.000071  |
| H  | 2.084103  | 2.298877  | 0.000018  |
| H  | -0.169237 | 3.451265  | 0.000015  |
| Br | -2.744999 | -0.629792 | -0.000090 |
| Br | 2.757058  | -0.628988 | 0.000017  |

-----  
Statistical Thermodynamic AnalysisTemperature= 298.150 Kelvin Pressure= 1.00000 Atm  
=====

SCF Energy= -5406.53025356 Predicted Change= -1.356932D-06

Zero-point correction (ZPE)= -5406.4738 0.05640

Internal Energy (U)= -5406.4669 0.06328

Enthalpy (H)= -5406.4660 0.06422

Gibbs Free Energy (G)= -5406.5079 0.02233  
-----

Frequencies -- 136.1364 147.8878 158.9081

Supporting Information: **25dibromopyrimidine.out**

-----  
 Using Gaussian 03: AM64L-G03RevC.02 12-Jun-2004  
 =====

# opt freq b3lyp/6-31g(d)

#N Geom=AllCheck Guess=Read SCRF=Check GenChk RB3LYP/6-31G(d) Freq

-----  
 Pointgroup= C1 Stoichiometry= C4H2Br2N2 C1[X(C4H2Br2N2)] #Atoms= 10

Charge = 0 Multiplicity = 1  
 -----

SCF Energy= -5406.52707357 Predicted Change= -5.140991D-07  
 =====

Optimization completed. {Found 2 times}

Item Max Val. Criteria Pass? RMS Val. Criteria Pass?

Force 0.00039 || 0.00045 [ YES ] 0.00009 || 0.00030 [ YES ]

Displ 0.00058 || 0.00180 [ YES ] 0.00058 || 0.00180 [ YES ]  
 -----

Atomic Coordinates (Angstroms)

| Atomic Type | X         | Y         | Z         |
|-------------|-----------|-----------|-----------|
| C           | -1.309126 | 0.000000  | 0.000048  |
| N           | -0.727269 | 1.194373  | 0.000025  |
| C           | 0.609838  | 1.190402  | 0.000008  |
| C           | 1.335057  | 0.000000  | 0.000004  |
| C           | 0.609837  | -1.190402 | 0.000006  |
| N           | -0.727270 | -1.194373 | 0.000022  |
| H           | 1.107346  | 2.156972  | 0.000004  |
| H           | 1.107345  | -2.156971 | -0.000001 |
| Br          | -3.215979 | 0.000000  | -0.000009 |
| Br          | 3.230077  | 0.000000  | -0.000012 |

-----  
 Statistical Thermodynamic Analysis

Temperature= 298.150 Kelvin Pressure= 1.00000 Atm  
 =====

SCF Energy= -5406.52707357 Predicted Change= -5.140991D-07

Zero-point correction (ZPE)= -5406.4705 0.05652

Internal Energy (U)= -5406.4636 0.06344

Enthalpy (H)= -5406.4626 0.06439

Gibbs Free Energy (G)= -5406.5046 0.02241  
 -----

Frequencies -- 67.9986 164.5648 221.7971

Supporting Information: **2bromo4radicalpyrimidine.out**

-----  
 Using Gaussian 03: IA32L-G03RevC.02 12-Jun-2004  
 =====

# opt nosymm freq ub3lyp/6-31g(d)  
 #N Geom=AllCheck Guess=Read SCRF=Check GenChk UB3LYP/6-31G(d) Freq  
 -----

Pointgroup= C1 Stoichiometry= C4H2BrN2(2) C1[X(C4H2BrN2)] #Atoms= 9  
 Charge = 0 Multiplicity = 2  
 -----

SCF Energy= -2834.74758033 Predicted Change= -2.764088D-08  
 =====

Optimization completed. {Found 2 times}  
 Item Max Val. Criteria Pass? RMS Val. Criteria Pass?  
 Force 0.00004 || 0.00045 [ YES ] 0.00001 || 0.00030 [ YES ]  
 Displ 0.00029 || 0.00180 [ YES ] 0.00029 || 0.00180 [ YES ]  
 -----

Atomic Coordinates (Angstroms)  
 Type X Y Z  
 -----

|    |           |           |           |
|----|-----------|-----------|-----------|
| C  | -1.137691 | 0.362651  | -0.000014 |
| N  | 0.008949  | -0.335432 | 0.000034  |
| C  | 1.099971  | 0.354890  | 0.000055  |
| C  | 1.169125  | 1.743298  | 0.000049  |
| C  | -0.083179 | 2.362485  | 0.000039  |
| N  | -1.238967 | 1.679397  | 0.000013  |
| H  | 2.095477  | 2.305053  | 0.000063  |
| H  | -0.171128 | 3.447830  | 0.000041  |
| Br | -2.754430 | -0.637976 | 0.000058  |

-----

## Statistical Thermodynamic Analysis

Temperature= 298.150 Kelvin Pressure= 1.00000 Atm  
 =====

SCF Energy= -2834.74758033 Predicted Change= -2.764088D-08  
 Zero-point correction (ZPE)= -2834.6937 0.05381  
 Internal Energy (U)= -2834.6883 0.05925  
 Enthalpy (H)= -2834.6873 0.06019  
 Gibbs Free Energy (G)= -2834.7251 0.02245  
 -----

Frequencies -- 147.8870 273.9726 327.7314

Supporting Information: **2bromo5radicalpyrimidine.out**

-----  
 Using Gaussian 03: IA32L-G03RevC.02 12-Jun-2004  
 =====

# opt freq ub31yp/6-31g(d) nosymm geom=connectivity  
 #N Geom=AllCheck Guess=Read SCRF=Check GenChk UB3LYP/6-31G(d) Freq  
 -----

Pointgroup= C1 Stoichiometry= C4H2BrN2(2) C1[X(C4H2BrN2)] #Atoms= 9  
 Charge = 0 Multiplicity = 2  
 -----

SCF Energy= -2834.73484468 Predicted Change= -2.930173D-07  
 =====

Optimization completed. {Found 2 times}  
 Item Max Val. Criteria Pass? RMS Val. Criteria Pass?  
 Force 0.00019 || 0.00045 [ YES ] 0.00007 || 0.00030 [ YES ]  
 Displ 0.00113 || 0.00180 [ YES ] 0.00113 || 0.00180 [ YES ]  
 -----

Atomic Coordinates (Angstroms)  
 Type X Y Z  
 -----

|    |           |           |           |
|----|-----------|-----------|-----------|
| C  | -1.300731 | 0.000000  | -0.000118 |
| N  | -0.727453 | 1.198382  | -0.000025 |
| C  | 0.620599  | 1.200079  | 0.000029  |
| C  | 1.297928  | 0.000000  | 0.000031  |
| C  | 0.620598  | -1.200079 | 0.000025  |
| N  | -0.727453 | -1.198381 | -0.000028 |
| H  | 1.109441  | 2.170772  | 0.000037  |
| H  | 1.109440  | -2.170772 | 0.000033  |
| Br | -3.212590 | 0.000000  | 0.000123  |

-----

## Statistical Thermodynamic Analysis

Temperature= 298.150 Kelvin Pressure= 1.00000 Atm  
 =====

SCF Energy= -2834.73484468 Predicted Change= -2.930173D-07  
 Zero-point correction (ZPE)= -2834.6810 0.05381  
 Internal Energy (U)= -2834.6755 0.05927  
 Enthalpy (H)= -2834.6746 0.06021  
 Gibbs Free Energy (G)= -2834.7124 0.02243  
 -----

Frequencies -- 161.2169 268.7679 324.5271

Supporting Information: **2bromopyrimidine.out**

-----  
 Using Gaussian 03: IA32L-G03RevC.02 12-Jun-2004  
 =====

# opt=(modredundant) freq b3lyp/6-31g(d) geom=connectivity  
 #N Geom=AllCheck Guess=Read SCRF=Check GenChk RB3LYP/6-31G(d) Freq  
 -----

Pointgroup= C1 Stoichiometry= C4H3BrN2 C1[X(C4H3BrN2)] #Atoms= 10  
 Charge = 0 Multiplicity = 1  
 -----

SCF Energy= -2835.42639139 Predicted Change= -2.074626D-07  
 =====

Optimization completed. {Found 2 times}  
 Item Max Val. Criteria Pass? RMS Val. Criteria Pass?  
 Force 0.00019 || 0.00045 [ YES ] 0.00006 || 0.00030 [ YES ]  
 Displ 0.00088 || 0.00180 [ YES ] 0.00088 || 0.00180 [ YES ]  
 -----

Atomic Coordinates (Angstroms)  
 Type X Y Z  
 -----

|    |           |           |           |
|----|-----------|-----------|-----------|
| C  | 0.149969  | -0.000002 | -0.000023 |
| N  | 0.726901  | -1.195768 | -0.000009 |
| C  | 2.066335  | -1.183106 | 0.000003  |
| C  | 2.802304  | 0.000001  | 0.000007  |
| C  | 2.066332  | 1.183107  | 0.000003  |
| N  | 0.726899  | 1.195767  | -0.000006 |
| H  | 2.552760  | -2.156660 | 0.000003  |
| H  | 3.886668  | 0.000002  | 0.000013  |
| H  | 2.552757  | 2.156661  | 0.000009  |
| Br | -1.762241 | 0.000000  | 0.000004  |

-----

## Statistical Thermodynamic Analysis

Temperature= 298.150 Kelvin Pressure= 1.00000 Atm  
 =====

SCF Energy= -2835.42639139 Predicted Change= -2.074626D-07  
 Zero-point correction (ZPE)= -2835.3596 0.06675  
 Internal Energy (U)= -2835.3541 0.07223  
 Enthalpy (H)= -2835.3532 0.07318  
 Gibbs Free Energy (G)= -2835.3904 0.03595  
 -----

Frequencies -- 146.1922 272.5902 322.4937



Supporting Information: **2bromopyrimidineradical.out**

-----  
 Using Gaussian 03: IA32L-G03RevC.02 12-Jun-2004  
 =====

# opt=(modredundant) freq b3lyp/6-31g(d) geom=connectivity  
 #N Geom=AllCheck Guess=Read SCRF=Check GenChk UB3LYP/6-31G(d) Freq  
 -----

Pointgroup= C1 Stoichiometry= C4H3N2(2) C1[X(C4H3N2)] #Atoms= 9  
 Charge = 0 Multiplicity = 2  
 -----

SCF Energy= -263.642061272 Predicted Change= -6.675453D-08  
 =====

Optimization completed. {Found 2 times}  
 Item Max Val. Criteria Pass? RMS Val. Criteria Pass?  
 Force 0.00006 || 0.00045 [ YES ] 0.00003 || 0.00030 [ YES ]  
 Displ 0.00035 || 0.00180 [ YES ] 0.00035 || 0.00180 [ YES ]  
 -----

Atomic Coordinates (Angstroms)  
 Type X Y Z  
 -----

|   |           |           |           |
|---|-----------|-----------|-----------|
| C | 0.000000  | -1.326550 | -0.000011 |
| N | 1.193074  | -0.785395 | -0.000008 |
| C | 1.190742  | 0.561822  | 0.000003  |
| C | 0.000000  | 1.288489  | 0.000011  |
| C | -1.190741 | 0.561822  | 0.000006  |
| N | -1.193074 | -0.785394 | -0.000005 |
| H | 2.161263  | 1.054365  | 0.000007  |
| H | 0.000001  | 2.373295  | 0.000021  |
| H | -2.161263 | 1.054366  | 0.000012  |

-----

## Statistical Thermodynamic Analysis

Temperature= 298.150 Kelvin Pressure= 1.00000 Atm  
 =====

SCF Energy= -263.642061272 Predicted Change= -6.675453D-08  
 Zero-point correction (ZPE)= -263.5779 0.06407  
 Internal Energy (U)= -263.5738 0.06825  
 Enthalpy (H)= -263.5728 0.06919  
 Gibbs Free Energy (G)= -263.6059 0.03614  
 -----

Frequencies -- 379.6524 383.2477 586.1641

Supporting Information: **4bromo2radicalpyrimidine.out**

-----  
 Using Gaussian 03: IA32L-G03RevC.02 12-Jun-2004  
 =====

# opt nosymm freq ub3lyp/6-31g(d)  
 #N Geom=AllCheck Guess=Read SCRF=Check GenChk UB3LYP/6-31G(d) Freq  
 -----

Pointgroup= C1 Stoichiometry= C4H2BrN2(2) C1[X(C4H2BrN2)] #Atoms= 9  
 Charge = 0 Multiplicity = 2  
 -----

SCF Energy= -2834.74635122 Predicted Change= -3.211446D-07  
 =====

Optimization completed. {Found 2 times}  
 Item Max Val. Criteria Pass? RMS Val. Criteria Pass?  
 Force 0.00024 || 0.00045 [ YES ] 0.00006 || 0.00030 [ YES ]  
 Displ 0.00077 || 0.00180 [ YES ] 0.00077 || 0.00180 [ YES ]  
 -----

Atomic Coordinates (Angstroms)  
 Type X Y Z  
 -----

|    |           |           |           |
|----|-----------|-----------|-----------|
| C  | -1.095523 | 0.384054  | 0.000102  |
| N  | -0.010313 | -0.357109 | 0.000092  |
| C  | 1.122199  | 0.340354  | 0.000066  |
| C  | 1.145497  | 1.737831  | 0.000028  |
| C  | -0.093281 | 2.374353  | 0.000047  |
| N  | -1.250549 | 1.680289  | 0.000086  |
| H  | 2.075834  | 2.291496  | -0.000011 |
| H  | -0.167820 | 3.459715  | 0.000024  |
| Br | 2.764140  | -0.627983 | 0.000011  |

-----

## Statistical Thermodynamic Analysis

Temperature= 298.150 Kelvin Pressure= 1.00000 Atm  
 =====

SCF Energy= -2834.74635122 Predicted Change= -3.211446D-07  
 Zero-point correction (ZPE)= -2834.6924 0.05389  
 Internal Energy (U)= -2834.6870 0.05933  
 Enthalpy (H)= -2834.6860 0.06027  
 Gibbs Free Energy (G)= -2834.7238 0.02250  
 -----

Frequencies -- 157.4607 266.3327 312.6770

Supporting Information: **4bromopyrimidine.out**

-----  
 Using Gaussian 03: IA32L-G03RevC.02 12-Jun-2004  
 =====

# opt=(modredundant) freq b3lyp/6-31g(d) geom=connectivity  
 #N Geom=AllCheck Guess=Read SCRF=Check GenChk RB3LYP/6-31G(d) Freq  
 -----

Pointgroup= C1 Stoichiometry= C4H3BrN2 C1[X(C4H3BrN2)] #Atoms= 10  
 Charge = 0 Multiplicity = 1  
 -----

SCF Energy= -2835.42897171 Predicted Change= -3.996250D-07  
 =====

Optimization completed. {Found 2 times}  
 Item Max Val. Criteria Pass? RMS Val. Criteria Pass?  
 Force 0.00020 || 0.00045 [ YES ] 0.00006 || 0.00030 [ YES ]  
 Displ 0.00056 || 0.00180 [ YES ] 0.00056 || 0.00180 [ YES ]  
 -----

Atomic Coordinates (Angstroms)  
 Type X Y Z  
 -----

|    |           |           |           |
|----|-----------|-----------|-----------|
| C  | -2.078913 | -1.150670 | 0.000015  |
| N  | -0.738035 | -1.184766 | 0.000004  |
| C  | -0.134896 | -0.010931 | 0.000008  |
| C  | -0.817244 | 1.205447  | 0.000007  |
| C  | -2.206035 | 1.108031  | 0.000008  |
| N  | -2.854106 | -0.065606 | 0.000013  |
| H  | -2.581036 | -2.115291 | 0.000005  |
| H  | -0.301076 | 2.157654  | 0.000006  |
| H  | -2.822517 | 2.005119  | 0.000014  |
| Br | 1.779204  | -0.005890 | -0.000011 |

-----

## Statistical Thermodynamic Analysis

Temperature= 298.150 Kelvin Pressure= 1.00000 Atm  
 =====

SCF Energy= -2835.42897171 Predicted Change= -3.996250D-07  
 Zero-point correction (ZPE)= -2835.3619 0.06703  
 Internal Energy (U)= -2835.3564 0.07251  
 Enthalpy (H)= -2835.3555 0.07345  
 Gibbs Free Energy (G)= -2835.3927 0.03623  
 -----

Frequencies -- 157.7627 264.0413 309.2432

Supporting Information: **4bromopyrimidineradical.out**

-----  
 Using Gaussian 03: IA32L-G03RevC.02 12-Jun-2004  
 =====

# opt=(modredundant) freq b3lyp/6-31g(d) geom=connectivity  
 #N Geom=AllCheck Guess=Read SCRF=Check GenChk UB3LYP/6-31G(d) Freq  
 -----

Pointgroup= C1 Stoichiometry= C4H3N2(2) C1[X(C4H3N2)] #Atoms= 9  
 Charge = 0 Multiplicity = 2  
 -----

SCF Energy= -263.646149248 Predicted Change= -2.527220D-07  
 =====

Optimization completed. {Found 2 times}  
 Item Max Val. Criteria Pass? RMS Val. Criteria Pass?  
 Force 0.00014 || 0.00045 [ YES ] 0.00005 || 0.00030 [ YES ]  
 Displ 0.00053 || 0.00180 [ YES ] 0.00053 || 0.00180 [ YES ]  
 -----

Atomic Coordinates (Angstroms)  
 Type X Y Z  
 -----

|   |           |           |           |
|---|-----------|-----------|-----------|
| C | 1.244944  | 0.378620  | -0.000042 |
| N | 1.030948  | -0.954898 | 0.000010  |
| C | -0.196020 | -1.354071 | 0.000017  |
| C | -1.303840 | -0.513461 | 0.000002  |
| C | -0.978361 | 0.845762  | 0.000011  |
| N | 0.285392  | 1.297614  | -0.000006 |
| H | 2.276944  | 0.719847  | 0.000030  |
| H | -2.330079 | -0.863083 | 0.000001  |
| H | -1.761583 | 1.603124  | 0.000006  |

-----

## Statistical Thermodynamic Analysis

Temperature= 298.150 Kelvin Pressure= 1.00000 Atm  
 =====

SCF Energy= -263.646149248 Predicted Change= -2.527220D-07  
 Zero-point correction (ZPE)= -263.5818 0.06427  
 Internal Energy (U)= -263.5777 0.06843  
 Enthalpy (H)= -263.5767 0.06937  
 Gibbs Free Energy (G)= -263.6097 0.03635  
 -----

Frequencies -- 349.6043 435.7294 602.1459

Supporting Information: **5bromo2radicalpyrimidine.out**

-----  
 Using Gaussian 03: IA32L-G03RevC.02 12-Jun-2004  
 =====

# opt nosymm freq ub3lyp/6-31g(d)  
 #N Geom=AllCheck Guess=Read SCRF=Check GenChk UB3LYP/6-31G(d) Freq  
 -----

Pointgroup= C1 Stoichiometry= C4H2BrN2(2) C1[X(C4H2BrN2)] #Atoms= 9  
 Charge = 0 Multiplicity = 2  
 -----

SCF Energy= -2834.74259275 Predicted Change= -2.214107D-07  
 =====

Optimization completed. {Found 2 times}  
 Item Max Val. Criteria Pass? RMS Val. Criteria Pass?  
 Force 0.00012 || 0.00045 [ YES ] 0.00005 || 0.00030 [ YES ]  
 Displ 0.00045 || 0.00180 [ YES ] 0.00045 || 0.00180 [ YES ]  
 -----

Atomic Coordinates (Angstroms)  
 Type X Y Z  
 -----

|    |           |           |           |
|----|-----------|-----------|-----------|
| C  | -1.280272 | 0.000000  | 0.000033  |
| N  | -0.736542 | 1.191014  | 0.000028  |
| C  | 0.608420  | 1.197855  | 0.000013  |
| C  | 1.324784  | 0.000000  | 0.000003  |
| C  | 0.608419  | -1.197855 | 0.000011  |
| N  | -0.736542 | -1.191013 | 0.000026  |
| H  | 1.111421  | 2.161583  | 0.000007  |
| H  | 1.111420  | -2.161583 | 0.000002  |
| Br | 3.224726  | 0.000000  | -0.000020 |

## Statistical Thermodynamic Analysis

Temperature= 298.150 Kelvin Pressure= 1.00000 Atm  
 =====

SCF Energy= -2834.74259275 Predicted Change= -2.214107D-07  
 Zero-point correction (ZPE)= -2834.6885 0.05402  
 Internal Energy (U)= -2834.6830 0.05949  
 Enthalpy (H)= -2834.6821 0.06044  
 Gibbs Free Energy (G)= -2834.7199 0.02262  
 -----

Frequencies -- 185.9838 245.2056 324.9357

Supporting Information: **5bromopyrimidine.out**

-----  
 Using Gaussian 03: IA32L-G03RevC.02 12-Jun-2004  
 =====

# opt=(modredundant) freq b3lyp/6-31g(d) geom=connectivity  
 #N Geom=AllCheck Guess=Read SCRF=Check GenChk RB3LYP/6-31G(d) Freq  
 -----

Pointgroup= C1 Stoichiometry= C4H3BrN2 C1[X(C4H3BrN2)] #Atoms= 10  
 Charge = 0 Multiplicity = 1  
 -----

SCF Energy= -2835.42591474 Predicted Change= -5.986460D-08  
 =====

Optimization completed. {Found 2 times}  
 Item Max Val. Criteria Pass? RMS Val. Criteria Pass?  
 Force 0.00011 || 0.00045 [ YES ] 0.00003 || 0.00030 [ YES ]  
 Displ 0.00065 || 0.00180 [ YES ] 0.00065 || 0.00180 [ YES ]  
 -----

Atomic Coordinates (Angstroms)  
 Type X Y Z  
 -----

|    |           |           |           |
|----|-----------|-----------|-----------|
| C  | 2.771380  | -0.000001 | 0.000005  |
| N  | 2.175511  | -1.197010 | 0.000002  |
| C  | 0.838957  | -1.192570 | 0.000000  |
| C  | 0.117467  | 0.000000  | -0.000002 |
| C  | 0.838958  | 1.192571  | -0.000004 |
| N  | 2.175512  | 1.197010  | 0.000000  |
| H  | 0.333414  | -2.155708 | 0.000002  |
| H  | 3.858986  | 0.000000  | 0.000003  |
| H  | 0.333415  | 2.155709  | -0.000002 |
| Br | -1.782387 | 0.000000  | 0.000000  |

-----

## Statistical Thermodynamic Analysis

Temperature= 298.150 Kelvin Pressure= 1.00000 Atm  
 =====

SCF Energy= -2835.42591474 Predicted Change= -5.986460D-08  
 Zero-point correction (ZPE)= -2835.3587 0.06719  
 Internal Energy (U)= -2835.3532 0.07268  
 Enthalpy (H)= -2835.3522 0.07362  
 Gibbs Free Energy (G)= -2835.3895 0.03638  
 -----

Frequencies -- 172.9330 243.9467 322.9716

Supporting Information: **5bromopyrimidineradical.out**

-----  
 Using Gaussian 03: IA32L-G03RevC.02 12-Jun-2004  
 =====

# opt=(modredundant) freq b3lyp/6-31g(d) geom=connectivity  
 #N Geom=AllCheck Guess=Read SCRF=Check GenChk UB3LYP/6-31G(d) Freq  
 -----

Pointgroup= C1 Stoichiometry= C4H3N2(2) C1[X(C4H3N2)] #Atoms= 9  
 Charge = 0 Multiplicity = 2  
 -----

SCF Energy= -263.634206758 Predicted Change= -1.719951D-07  
 =====

Optimization completed. {Found 2 times}  
 Item Max Val. Criteria Pass? RMS Val. Criteria Pass?  
 Force 0.00017 || 0.00045 [ YES ] 0.00006 || 0.00030 [ YES ]  
 Displ 0.00089 || 0.00180 [ YES ] 0.00089 || 0.00180 [ YES ]  
 -----

Atomic Coordinates (Angstroms)  
 Type X Y Z  
 -----

|   |           |           |           |
|---|-----------|-----------|-----------|
| C | 0.000000  | 1.240533  | 0.000005  |
| N | -1.200971 | 0.653718  | -0.000002 |
| C | -1.201978 | -0.694199 | -0.000002 |
| C | 0.000000  | -1.368860 | 0.000002  |
| C | 1.201978  | -0.694199 | -0.000003 |
| N | 1.200972  | 0.653718  | 0.000000  |
| H | -2.169723 | -1.190249 | 0.000001  |
| H | 0.000000  | 2.328795  | -0.000007 |
| H | 2.169723  | -1.190250 | 0.000008  |

-----

## Statistical Thermodynamic Analysis

Temperature= 298.150 Kelvin Pressure= 1.00000 Atm  
 =====

SCF Energy= -263.634206758 Predicted Change= -1.719951D-07  
 Zero-point correction (ZPE)= -263.5699 0.06430  
 Internal Energy (U)= -263.5657 0.06846  
 Enthalpy (H)= -263.5648 0.06940  
 Gibbs Free Energy (G)= -263.5978 0.03637  
 -----

Frequencies -- 381.5943 399.0817 567.7578

**Bromopyrroles**Supporting Information: **23dibromopyrrole.out**-----  
Using Gaussian 03: IA32L-G03RevC.02 12-Jun-2004  
=====

# opt freq b3lyp/6-31g(d)

#N Geom=AllCheck Guess=Read SCRF=Check GenChk RB3LYP/6-31G(d) Freq

-----  
Pointgroup= C1 Stoichiometry= C4H3Br2N C1[X(C4H3Br2N)] #Atoms= 10Charge = 0 Multiplicity = 1  
-----SCF Energy= -5352.36898278 Predicted Change= -3.408782D-08  
=====

Optimization completed. {Found 2 times}

Item Max Val. Criteria Pass? RMS Val. Criteria Pass?

Force 0.00005 || 0.00045 [ YES ] 0.00001 || 0.00030 [ YES ]

Displ 0.00047 || 0.00180 [ YES ] 0.00047 || 0.00180 [ YES ]  
-----Atomic Coordinates (Angstroms)  
Type X Y Z  
-----

|    |           |           |           |
|----|-----------|-----------|-----------|
| C  | 0.122636  | 2.778893  | 0.000151  |
| C  | -1.053974 | 2.063458  | 0.000100  |
| C  | -0.701951 | 0.685738  | 0.000094  |
| C  | 0.672676  | 0.605224  | -0.000030 |
| N  | 1.168230  | 1.884428  | -0.000010 |
| H  | 2.150877  | 2.112334  | -0.000099 |
| H  | 0.302369  | 3.843767  | 0.000224  |
| H  | -2.056349 | 2.465785  | 0.000146  |
| Br | 1.797955  | -0.888414 | -0.000186 |
| Br | -1.878264 | -0.780522 | 0.000126  |

-----  
Statistical Thermodynamic AnalysisTemperature= 298.150 Kelvin Pressure= 1.00000 Atm  
=====

SCF Energy= -5352.36898278 Predicted Change= -3.408782D-08

Zero-point correction (ZPE)= -5352.3060 0.06292

Internal Energy (U)= -5352.2993 0.06958

Enthalpy (H)= -5352.2984 0.07053

Gibbs Free Energy (G)= -5352.3394 0.02955  
-----

Frequencies -- 103.2135 179.4841 227.5407



Supporting Information: **2bromopyrrole.out**

-----  
 Using Gaussian 03: AM64L-G03RevC.02 12-Jun-2004  
 =====

# opt=(modredundant) freq b3lyp/6-31g(d) geom=connectivity  
 #N Geom=AllCheck Guess=Read SCRF=Check GenChk RB3LYP/6-31G(d) Freq  
 -----

Pointgroup= C1 Stoichiometry= C4H4BrN C1[X(C4H4BrN)] #Atoms= 10  
 Charge = 0 Multiplicity = 1  
 -----

SCF Energy= -2781.26768188 Predicted Change= -3.657514D-08  
 =====

Optimization completed. {Found 2 times}  
 Item Max Val. Criteria Pass? RMS Val. Criteria Pass?  
 Force 0.00007 || 0.00045 [ YES ] 0.00001 || 0.00030 [ YES ]  
 Displ 0.00060 || 0.00180 [ YES ] 0.00060 || 0.00180 [ YES ]  
 -----

Atomic Coordinates (Angstroms)  
 Type X Y Z  
 -----

|    |           |           |           |
|----|-----------|-----------|-----------|
| C  | 2.415638  | -0.714662 | 0.000228  |
| C  | 2.499751  | 0.660342  | 0.000164  |
| C  | 1.171919  | 1.179948  | 0.000189  |
| C  | 0.329521  | 0.093057  | 0.000030  |
| N  | 1.080909  | -1.053994 | 0.000128  |
| H  | 0.699736  | -1.987545 | 0.000014  |
| H  | 3.181017  | -1.476752 | 0.000305  |
| H  | 3.413604  | 1.238689  | 0.000199  |
| H  | 0.868128  | 2.216511  | 0.000227  |
| Br | -1.549423 | 0.002141  | -0.000152 |

-----

## Statistical Thermodynamic Analysis

Temperature= 298.150 Kelvin Pressure= 1.00000 Atm  
 =====

SCF Energy= -2781.26768188 Predicted Change= -3.657514D-08  
 Zero-point correction (ZPE)= -2781.1948 0.07280  
 Internal Energy (U)= -2781.1896 0.07807  
 Enthalpy (H)= -2781.1886 0.07902  
 Gibbs Free Energy (G)= -2781.2249 0.04277  
 -----

Frequencies -- 198.7158 252.8478 362.1089

Supporting Information: **2radical3bromopyrrole.out**

-----  
 Using Gaussian 03: IA32L-G03RevC.02 12-Jun-2004  
 =====

# opt nosymm freq ub3lyp/6-31g(d)  
 #N Geom=AllCheck Guess=Read SCRF=Check GenChk UB3LYP/6-31G(d) Freq  
 -----

Pointgroup= C1 Stoichiometry= C4H3BrN(2) C1[X(C4H3BrN)] #Atoms= 9  
 Charge = 0 Multiplicity = 2  
 -----

SCF Energy= -2780.56671497 Predicted Change= -1.287646D-07  
 =====

Optimization completed. {Found 2 times}  
 Item Max Val. Criteria Pass? RMS Val. Criteria Pass?  
 Force 0.00009 || 0.00045 [ YES ] 0.00003 || 0.00030 [ YES ]  
 Displ 0.00087 || 0.00180 [ YES ] 0.00087 || 0.00180 [ YES ]  
 -----

Atomic Coordinates (Angstroms)  
 Type X Y Z  
 -----

|    |           |           |           |
|----|-----------|-----------|-----------|
| C  | 0.123625  | 2.781847  | -0.000154 |
| C  | -1.048841 | 2.060600  | 0.000383  |
| C  | -0.701705 | 0.671644  | -0.000086 |
| C  | 0.664211  | 0.623808  | -0.000036 |
| N  | 1.178553  | 1.882758  | 0.000185  |
| H  | 2.159018  | 2.117745  | 0.000222  |
| H  | 0.301199  | 3.847624  | -0.000328 |
| H  | -2.053825 | 2.458961  | 0.000656  |
| Br | -1.895984 | -0.785883 | -0.000140 |

-----

## Statistical Thermodynamic Analysis

Temperature= 298.150 Kelvin Pressure= 1.00000 Atm  
 =====

SCF Energy= -2780.56671497 Predicted Change= -1.287646D-07  
 Zero-point correction (ZPE)= -2780.5076 0.05908  
 Internal Energy (U)= -2780.5026 0.06402  
 Enthalpy (H)= -2780.5017 0.06496  
 Gibbs Free Energy (G)= -2780.5380 0.02868  
 -----

Frequencies -- -74.3784 247.4541 301.4714

Supporting Information: **3bromopyrrole.out**

-----  
 Using Gaussian 03: AM64L-G03RevC.02 12-Jun-2004  
 =====

# opt=(modredundant) freq b3lyp/6-31g(d) geom=connectivity  
 #N Geom=AllCheck Guess=Read SCRF=Check GenChk RB3LYP/6-31G(d) Freq  
 -----

Pointgroup= C1 Stoichiometry= C4H4BrN C1[X(C4H4BrN)] #Atoms= 10  
 Charge = 0 Multiplicity = 1  
 -----

SCF Energy= -2781.26875010 Predicted Change= -5.139210D-07  
 =====

Optimization completed. {Found 1 times}  
 Item Max Val. Criteria Pass? RMS Val. Criteria Pass?  
 Force 0.00024 || 0.00045 [ YES ] 0.00007 || 0.00030 [ YES ]  
 Displ 0.00188 || 0.00180 [ NO ] 0.00188 || 0.00180 [ YES ]  
 -----

Atomic Coordinates (Angstroms)  
 Type X Y Z  
 -----

|    |           |           |           |
|----|-----------|-----------|-----------|
| C  | 2.441918  | 0.711637  | 0.000067  |
| C  | 1.140568  | 1.165433  | 0.000119  |
| C  | 0.312354  | 0.010607  | -0.000002 |
| C  | 1.113373  | -1.108686 | -0.000022 |
| N  | 2.413476  | -0.662830 | 0.000007  |
| H  | 3.225439  | -1.260842 | -0.000133 |
| H  | 3.377224  | 1.252219  | 0.000114  |
| H  | 0.812148  | 2.194386  | 0.000203  |
| H  | 0.861895  | -2.157885 | -0.000078 |
| Br | -1.577723 | -0.001772 | -0.000032 |

-----

## Statistical Thermodynamic Analysis

Temperature= 298.150 Kelvin Pressure= 1.00000 Atm  
 =====

SCF Energy= -2781.26875010 Predicted Change= -5.139210D-07  
 Zero-point correction (ZPE)= -2781.1958 0.07293  
 Internal Energy (U)= -2781.1905 0.07819  
 Enthalpy (H)= -2781.1896 0.07913  
 Gibbs Free Energy (G)= -2781.2258 0.04293  
 -----

Frequencies -- 219.6058 249.9147 356.6598

Supporting Information: **3bromopyrroleradical.out**

-----  
 Using Gaussian 03: IA32L-G03RevC.02 12-Jun-2004  
 =====

# opt nosymm freq ub3lyp/6-31g(d) geom=connectivity  
 #N Geom=AllCheck Guess=Read SCRF=Check GenChk UB3LYP/6-31G(d) Freq  
 -----

Pointgroup= C1 Stoichiometry= C4H4N(2) C1[X(C4H4N)] #Atoms= 9  
 Charge = 0 Multiplicity = 2  
 -----

SCF Energy= -209.467949548 Predicted Change= -1.832441D-07  
 =====

Optimization completed. {Found 2 times}  
 Item Max Val. Criteria Pass? RMS Val. Criteria Pass?  
 Force 0.00011 || 0.00045 [ YES ] 0.00004 || 0.00030 [ YES ]  
 Displ 0.00117 || 0.00180 [ YES ] 0.00117 || 0.00180 [ YES ]  
 -----

Atomic Coordinates (Angstroms)  
 Type X Y Z  
 -----

|   |          |           |           |
|---|----------|-----------|-----------|
| C | 2.436334 | 0.709598  | 0.000089  |
| C | 1.131273 | 1.173565  | 0.000100  |
| C | 0.329286 | 0.011554  | 0.000066  |
| C | 1.103402 | -1.117382 | -0.000036 |
| N | 2.412071 | -0.664931 | -0.000016 |
| H | 3.230355 | -1.255415 | -0.000130 |
| H | 3.373645 | 1.248749  | 0.000129  |
| H | 0.818361 | 2.207841  | 0.000168  |
| H | 0.863666 | -2.169539 | -0.000096 |

## Statistical Thermodynamic Analysis

Temperature= 298.150 Kelvin Pressure= 1.00000 Atm  
 =====

SCF Energy= -209.467949548 Predicted Change= -1.832441D-07  
 Zero-point correction (ZPE)= -209.3981 0.06976  
 Internal Energy (U)= -209.3941 0.07380  
 Enthalpy (H)= -209.3931 0.07475  
 Gibbs Free Energy (G)= -209.4252 0.04274  
 -----

Frequencies -- 406.2465 537.5173 633.4816

Supporting Information: **2bromopyrroleradical.out**

-----  
 Using Gaussian 03: IA32L-G03RevC.02 12-Jun-2004  
 =====

# opt nosymm freq ub3lyp/6-31g(d) geom=connectivity  
 #N Geom=AllCheck Guess=Read SCRF=Check GenChk UB3LYP/6-31G(d) Freq  
 -----

Pointgroup= C1 Stoichiometry= C4H4N(2) C1[X(C4H4N)] #Atoms= 9  
 Charge = 0 Multiplicity = 2  
 -----

SCF Energy= -209.466819346 Predicted Change= -3.209980D-07  
 =====

Optimization completed. {Found 2 times}  
 Item Max Val. Criteria Pass? RMS Val. Criteria Pass?  
 Force 0.00016 || 0.00045 [ YES ] 0.00005 || 0.00030 [ YES ]  
 Displ 0.00145 || 0.00180 [ YES ] 0.00145 || 0.00180 [ YES ]  
 -----

Atomic Coordinates (Angstroms)  
 Type X Y Z  
 -----

|   |          |           |           |
|---|----------|-----------|-----------|
| C | 2.417127 | -0.717278 | 0.000034  |
| C | 2.496588 | 0.657247  | 0.000369  |
| C | 1.162684 | 1.190137  | 0.000035  |
| C | 0.347058 | 0.091119  | 0.000077  |
| N | 1.072988 | -1.059605 | 0.000251  |
| H | 0.698986 | -1.995449 | 0.000234  |
| H | 3.184935 | -1.477621 | -0.000067 |
| H | 3.410391 | 1.237686  | 0.000556  |
| H | 0.869466 | 2.229359  | -0.000005 |

-----

## Statistical Thermodynamic Analysis

Temperature= 298.150 Kelvin Pressure= 1.00000 Atm  
 =====

SCF Energy= -209.466819346 Predicted Change= -3.209980D-07  
 Zero-point correction (ZPE)= -209.3976 0.06921  
 Internal Energy (U)= -209.3933 0.07345  
 Enthalpy (H)= -209.3924 0.07440  
 Gibbs Free Energy (G)= -209.4248 0.04199  
 -----

Frequencies -- 272.2314 444.0314 618.1534

Supporting Information: **3radical2bromopyrrole.out**

-----  
 Using Gaussian 03: IA32L-G03RevC.02 12-Jun-2004  
 =====

# opt nosymm freq ub3lyp/6-31g(d)  
 #N Geom=AllCheck Guess=Read SCRF=Check GenChk UB3LYP/6-31G(d) Freq  
 -----

Pointgroup= C1 Stoichiometry= C4H3BrN(2) C1[X(C4H3BrN)] #Atoms= 9  
 Charge = 0 Multiplicity = 2  
 -----

SCF Energy= -2780.56771952 Predicted Change= -1.077140D-07  
 =====

Optimization completed. {Found 2 times}  
 Item Max Val. Criteria Pass? RMS Val. Criteria Pass?  
 Force 0.00005 || 0.00045 [ YES ] 0.00002 || 0.00030 [ YES ]  
 Displ 0.00093 || 0.00180 [ YES ] 0.00093 || 0.00180 [ YES ]  
 -----

Atomic Coordinates (Angstroms)  
 Type X Y Z  
 -----

|    |           |           |           |
|----|-----------|-----------|-----------|
| C  | 0.120704  | 2.773540  | 0.000362  |
| C  | -1.067334 | 2.062611  | -0.000010 |
| C  | -0.689835 | 0.702061  | 0.000113  |
| C  | 0.670573  | 0.594083  | 0.000062  |
| N  | 1.168812  | 1.881084  | -0.000222 |
| H  | 2.150679  | 2.115711  | -0.000461 |
| H  | 0.302064  | 3.839163  | 0.000580  |
| H  | -2.064306 | 2.479037  | -0.000037 |
| Br | 1.811112  | -0.896078 | 0.000003  |

-----

Statistical Thermodynamic Analysis  
 Temperature= 298.150 Kelvin Pressure= 1.00000 Atm  
 =====

SCF Energy= -2780.56771952 Predicted Change= -1.077140D-07  
 Zero-point correction (ZPE)= -2780.5077 0.05994  
 Internal Energy (U)= -2780.5024 0.06527  
 Enthalpy (H)= -2780.5015 0.06621  
 Gibbs Free Energy (G)= -2780.5384 0.02922  
 -----

Frequencies -- 179.1985 251.4565 366.5613

**Bromoxazoles**Supporting Information: **2bromooxazole.out**-----  
Using Gaussian 03: IA32L-G03RevC.02 12-Jun-2004  
=====# opt=(modredundant) freq b3lyp/6-31g(d) geom=connectivity  
#N Geom=AllCheck Guess=Read SCRF=Check GenChk RB3LYP/6-31G(d) Freq  
-----Pointgroup= C1 Stoichiometry= C3H2BrNO C1[X(C3H2BrNO)] #Atoms= 8  
Charge = 0 Multiplicity = 1  
-----SCF Energy= -2817.16671029 Predicted Change= -2.552798D-07  
=====Optimization completed. {Found 2 times}  
Item Max Val. Criteria Pass? RMS Val. Criteria Pass?  
Force 0.00013 || 0.00045 [ YES ] 0.00005 || 0.00030 [ YES ]  
Displ 0.00160 || 0.00180 [ YES ] 0.00160 || 0.00180 [ YES ]  
-----Atomic Coordinates (Angstroms)  
Type X Y Z  
-----

|    |           |           |           |
|----|-----------|-----------|-----------|
| C  | 2.351421  | -0.684918 | 0.000162  |
| C  | 2.387383  | 0.669214  | 0.000193  |
| C  | 0.355671  | 0.105043  | 0.000062  |
| H  | 3.080610  | -1.478746 | 0.000223  |
| H  | 3.241819  | 1.330297  | 0.000264  |
| N  | 1.086349  | 1.168767  | -0.000049 |
| O  | 1.029859  | -1.069500 | 0.000094  |
| Br | -1.506646 | -0.000370 | -0.000097 |

-----  
Statistical Thermodynamic AnalysisTemperature= 298.150 Kelvin Pressure= 1.00000 Atm  
=====SCF Energy= -2817.16671029 Predicted Change= -2.552798D-07  
Zero-point correction (ZPE)= -2817.1181 0.04855  
Internal Energy (U)= -2817.1133 0.05332  
Enthalpy (H)= -2817.1124 0.05427  
Gibbs Free Energy (G)= -2817.1478 0.01885  
-----

Frequencies -- 216.2019 274.1142 373.9288

Supporting Information: **5bromooxazole.out**

-----  
 Using Gaussian 03: IA32L-G03RevC.02 12-Jun-2004  
 =====

# opt=(modredundant) freq b3lyp/6-31g(d) geom=connectivity  
 #N Geom=AllCheck Guess=Read SCRF=Check GenChk RB3LYP/6-31G(d) Freq  
 -----

Pointgroup= C1 Stoichiometry= C3H2BrNO C1[X(C3H2BrNO)] #Atoms= 8  
 Charge = 0 Multiplicity = 1  
 -----

SCF Energy= -2817.16727767 Predicted Change= -8.121831D-08  
 =====

Optimization completed. {Found 2 times}  
 Item Max Val. Criteria Pass? RMS Val. Criteria Pass?  
 Force 0.00011 || 0.00045 [ YES ] 0.00003 || 0.00030 [ YES ]  
 Displ 0.00048 || 0.00180 [ YES ] 0.00048 || 0.00180 [ YES ]  
 -----

Atomic Coordinates (Angstroms)  
 Type X Y Z  
 -----

|    |           |           |           |
|----|-----------|-----------|-----------|
| C  | 0.334918  | 0.104663  | 0.000022  |
| C  | 1.206930  | 1.144402  | 0.000049  |
| C  | 2.343312  | -0.647084 | 0.000185  |
| H  | 0.998092  | 2.203529  | 0.000005  |
| H  | 3.095427  | -1.422194 | 0.000239  |
| N  | 2.500676  | 0.637192  | 0.000114  |
| O  | 1.046035  | -1.062377 | 0.000079  |
| Br | -1.522214 | -0.010130 | -0.000092 |

-----

## Statistical Thermodynamic Analysis

Temperature= 298.150 Kelvin Pressure= 1.00000 Atm  
 =====

SCF Energy= -2817.16727767 Predicted Change= -8.121831D-08  
 Zero-point correction (ZPE)= -2817.1184 0.04882  
 Internal Energy (U)= -2817.1136 0.05359  
 Enthalpy (H)= -2817.1127 0.05454  
 Gibbs Free Energy (G)= -2817.1481 0.01907  
 -----

Frequencies -- 216.4021 258.6710 369.0466



Supporting Information: **4bromooxazole.out**

-----  
 Using Gaussian 03: IA32L-G03RevC.02 12-Jun-2004  
 =====

# opt=(modredundant) freq b3lyp/6-31g(d) geom=connectivity  
 #N Geom=AllCheck Guess=Read SCRF=Check GenChk RB3LYP/6-31G(d) Freq  
 -----

Pointgroup= C1 Stoichiometry= C3H2BrNO C1[X(C3H2BrNO)] #Atoms= 8  
 Charge = 0 Multiplicity = 1  
 -----

SCF Energy= -2817.16917476 Predicted Change= -2.432846D-07  
 =====

Optimization completed. {Found 2 times}  
 Item Max Val. Criteria Pass? RMS Val. Criteria Pass?  
 Force 0.00016 || 0.00045 [ YES ] 0.00005 || 0.00030 [ YES ]  
 Displ 0.00062 || 0.00180 [ YES ] 0.00062 || 0.00180 [ YES ]  
 -----

Atomic Coordinates (Angstroms)  
 Type X Y Z  
 -----

|    |           |           |           |
|----|-----------|-----------|-----------|
| C  | -1.144688 | 1.100608  | 0.000003  |
| C  | -0.333598 | 0.012928  | 0.000011  |
| C  | -2.307403 | -0.712882 | 0.000126  |
| H  | -0.994720 | 2.167032  | -0.000057 |
| H  | -3.220538 | -1.289566 | 0.000177  |
| N  | -1.085922 | -1.144765 | 0.000141  |
| O  | -2.434635 | 0.637477  | 0.000055  |
| Br | 1.543084  | -0.010510 | -0.000068 |

-----

## Statistical Thermodynamic Analysis

Temperature= 298.150 Kelvin Pressure= 1.00000 Atm  
 =====

SCF Energy= -2817.16917476 Predicted Change= -2.432846D-07  
 Zero-point correction (ZPE)= -2817.1203 0.04880  
 Internal Energy (U)= -2817.1156 0.05356  
 Enthalpy (H)= -2817.1146 0.05451  
 Gibbs Free Energy (G)= -2817.1500 0.01908  
 -----

Frequencies -- 234.8194 266.1350 362.3112

**Bromothiophenes**Supporting Information: **23dibromothiophene.out**-----  
Using Gaussian 03: IA32L-G03RevC.02 12-Jun-2004  
=====

# opt freq b3lyp/6-31g(d)

#N Geom=AllCheck Guess=Read SCRF=Check GenChk RB3LYP/6-31G(d) Freq

-----  
Pointgroup= C1 Stoichiometry= C4H2Br2S C1[X(C4H2Br2S)] #Atoms= 9Charge = 0 Multiplicity = 1  
-----SCF Energy= -5695.20269054 Predicted Change= -9.595885D-08  
=====

Optimization completed. {Found 2 times}

Item Max Val. Criteria Pass? RMS Val. Criteria Pass?

Force 0.00009 || 0.00045 [ YES ] 0.00003 || 0.00030 [ YES ]

Displ 0.00062 || 0.00180 [ YES ] 0.00062 || 0.00180 [ YES ]  
-----

Atomic Coordinates (Angstroms)

Type X Y Z

-----  
C 0.800189 2.682038 0.000113  
C -0.476755 2.201685 -0.000027  
C -0.518961 0.773112 0.000000  
C 0.723028 0.199307 0.000009  
S 1.978712 1.404405 -0.000136  
H 1.124660 3.713929 0.000207  
H -1.365518 2.820590 -0.000027  
Br 1.145094 -1.626730 0.000032  
Br -2.133195 -0.205894 0.000009  
-----

Statistical Thermodynamic Analysis

Temperature= 298.150 Kelvin Pressure= 1.00000 Atm  
=====

SCF Energy= -5695.20269054 Predicted Change= -9.595885D-08

Zero-point correction (ZPE)= -5695.1556 0.04704

Internal Energy (U)= -5695.1487 0.05391

Enthalpy (H)= -5695.1478 0.05486

Gibbs Free Energy (G)= -5695.1896 0.01308  
-----

Frequencies -- 111.6414 140.2454 220.0498

Supporting Information: **24dibromothiophene.out**

-----  
 Using Gaussian 03: IA32L-G03RevC.02 12-Jun-2004  
 =====

# opt freq b3lyp/6-31g(d)

#N Geom=AllCheck Guess=Read SCRF=Check GenChk RB3LYP/6-31G(d) Freq

-----  
 Pointgroup= C1 Stoichiometry= C4H2Br2S C1[X(C4H2Br2S)] #Atoms= 9

Charge = 0 Multiplicity = 1

-----  
 SCF Energy= -5695.20288690 Predicted Change= -8.520640D-08  
 =====

Optimization completed. {Found 2 times}

Item Max Val. Criteria Pass? RMS Val. Criteria Pass?

Force 0.00008 || 0.00045 [ YES ] 0.00002 || 0.00030 [ YES ]

Displ 0.00068 || 0.00180 [ YES ] 0.00068 || 0.00180 [ YES ]

-----  
 Atomic Coordinates (Angstroms)  
 Type X Y Z

|    |           |           |           |
|----|-----------|-----------|-----------|
| C  | -0.915140 | 1.547253  | 0.000068  |
| C  | -1.207503 | 0.215122  | 0.000010  |
| C  | -0.065302 | -0.642820 | 0.000036  |
| C  | 1.089889  | 0.084032  | -0.000015 |
| S  | 0.804731  | 1.801320  | -0.000073 |
| H  | -1.597862 | 2.384733  | 0.000117  |
| H  | -0.111583 | -1.723702 | 0.000061  |
| Br | 2.848543  | -0.586711 | -0.000040 |
| Br | -2.979341 | -0.461965 | 0.000052  |

-----  
 Statistical Thermodynamic Analysis

Temperature= 298.150 Kelvin Pressure= 1.00000 Atm

-----  
 SCF Energy= -5695.20288690 Predicted Change= -8.520640D-08

Zero-point correction (ZPE)= -5695.1559 0.04698

Internal Energy (U)= -5695.1489 0.05389

Enthalpy (H)= -5695.1480 0.05483

Gibbs Free Energy (G)= -5695.1900 0.01287

-----  
 Frequencies -- 127.6533 133.6650 227.7545

Supporting Information: **2bromo3radicalthiophene.out**

-----  
 Using Gaussian 03: IA32L-G03RevC.02 12-Jun-2004  
 =====

# opt nosymm freq ub3lyp/6-31g(d)  
 #N Geom=AllCheck Guess=Read SCRF=Check GenChk UB3LYP/6-31G(d) Freq  
 -----

Pointgroup= C1 Stoichiometry= C4H2BrS(2) C1[X(C4H2BrS)] #Atoms= 8  
 Charge = 0 Multiplicity = 2  
 -----

SCF Energy= -3123.40750004 Predicted Change= -2.693128D-07  
 =====

Optimization completed. {Found 2 times}  
 Item Max Val. Criteria Pass? RMS Val. Criteria Pass?  
 Force 0.00018 || 0.00045 [ YES ] 0.00005 || 0.00030 [ YES ]  
 Displ 0.00113 || 0.00180 [ YES ] 0.00113 || 0.00180 [ YES ]  
 -----

Atomic Coordinates (Angstroms)  
 Type X Y Z  
 -----

|    |           |           |           |
|----|-----------|-----------|-----------|
| C  | 0.794448  | 2.684938  | -0.000132 |
| C  | -0.489807 | 2.206254  | 0.000159  |
| C  | -0.481160 | 0.789322  | 0.000029  |
| C  | 0.720727  | 0.182802  | -0.000165 |
| S  | 1.983032  | 1.410335  | 0.000648  |
| H  | 1.122041  | 3.716927  | -0.000287 |
| H  | -1.377171 | 2.827498  | 0.000163  |
| Br | 1.138339  | -1.649739 | -0.000244 |

-----

## Statistical Thermodynamic Analysis

Temperature= 298.150 Kelvin Pressure= 1.00000 Atm  
 =====

SCF Energy= -3123.40750004 Predicted Change= -2.693128D-07  
 Zero-point correction (ZPE)= -3123.3631 0.04433  
 Internal Energy (U)= -3123.3577 0.04979  
 Enthalpy (H)= -3123.3567 0.05073  
 Gibbs Free Energy (G)= -3123.3946 0.01287  
 -----

Frequencies -- 171.9308 205.4429 330.8212

Supporting Information: **2bromo4radicalthiophene.out**

-----  
 Using Gaussian 03: IA32L-G03RevC.02 12-Jun-2004  
 =====

# opt nosymm freq ub3lyp/6-31g(d)  
 #N Geom=AllCheck Guess=Read SCRF=Check GenChk UB3LYP/6-31G(d) Freq  
 -----

Pointgroup= C1 Stoichiometry= C4H2BrS(2) C1[X(C4H2BrS)] #Atoms= 8  
 Charge = 0 Multiplicity = 2  
 -----

SCF Energy= -3123.40992178 Predicted Change= -3.105524D-09  
 =====

Optimization completed. {Found 2 times}  
 Item Max Val. Criteria Pass? RMS Val. Criteria Pass?  
 Force 0.00001 || 0.00045 [ YES ] 0.00000 || 0.00030 [ YES ]  
 Displ 0.00009 || 0.00180 [ YES ] 0.00009 || 0.00180 [ YES ]  
 -----

Atomic Coordinates (Angstroms)  
 Type X Y Z  
 -----

|    |           |           |           |
|----|-----------|-----------|-----------|
| C  | -0.936904 | 1.553293  | 0.000043  |
| C  | -1.175447 | 0.228083  | 0.000071  |
| C  | -0.069900 | -0.657736 | 0.000035  |
| C  | 1.085928  | 0.078001  | -0.000014 |
| S  | 0.809172  | 1.799985  | -0.000013 |
| H  | -1.607948 | 2.400444  | 0.000064  |
| H  | -0.111084 | -1.739011 | 0.000047  |
| Br | 2.851956  | -0.583832 | -0.000070 |

-----

## Statistical Thermodynamic Analysis

Temperature= 298.150 Kelvin Pressure= 1.00000 Atm  
 =====

SCF Energy= -3123.40992178 Predicted Change= -3.105524D-09  
 Zero-point correction (ZPE)= -3123.3657 0.04418  
 Internal Energy (U)= -3123.3602 0.04965  
 Enthalpy (H)= -3123.3593 0.05059  
 Gibbs Free Energy (G)= -3123.3971 0.01278  
 -----

Frequencies -- 186.4028 212.4842 329.9215

Supporting Information: **2bromothiophene.out**

Using Gaussian 03: AM64L-G03RevC.02 12-Jun-2004

# opt=(modredundant) freq b3lyp/6-31g(d) geom=connectivity  
#N Geom=AllCheck Guess=Read SCRF=Check GenChk RB3LYP/6-31G(d) Freq

Pointgroup= C1 Stoichiometry= C4H3BrS C1[X(C4H3BrS)] #Atoms= 9  
Charge = 0 Multiplicity = 1

SCF Energy= -3124.10129651 Predicted Change= -2.992047D-08

Optimization completed. {Found 2 times}  
Item Max Val. Criteria Pass? RMS Val. Criteria Pass?  
Force 0.00005 || 0.00045 [ YES ] 0.00001 || 0.00030 [ YES ]  
Displ 0.00041 || 0.00180 [ YES ] 0.00041 || 0.00180 [ YES ]

Atomic Coordinates (Angstroms)  
Type X Y Z

|    |           |           |           |
|----|-----------|-----------|-----------|
| C  | -2.584370 | -0.203715 | 0.000029  |
| C  | -2.266759 | 1.125558  | -0.000090 |
| C  | -0.857453 | 1.367157  | 0.000089  |
| C  | -0.142089 | 0.203302  | 0.000001  |
| S  | -1.163440 | -1.205444 | 0.000005  |
| H  | -3.564728 | -0.661059 | 0.000042  |
| H  | -3.008703 | 1.916669  | -0.000150 |
| H  | -0.398939 | 2.348688  | 0.000135  |
| Br | 1.734041  | 0.020828  | -0.000008 |

## Statistical Thermodynamic Analysis

Temperature= 298.150 Kelvin Pressure= 1.00000 Atm

SCF Energy= -3124.10129651 Predicted Change= -2.992047D-08  
Zero-point correction (ZPE)= -3124.0442 0.05702  
Internal Energy (U)= -3124.0388 0.06245  
Enthalpy (H)= -3124.0378 0.06340  
Gibbs Free Energy (G)= -3124.0750 0.02626

Frequencies -- 189.0153 212.7394 330.8773

Supporting Information: **2bromothiopheneradical.out**

-----  
 Using Gaussian 03: IA32L-G03RevC.02 12-Jun-2004  
 =====

# opt nosymm freq ub3lyp/6-31g(d) geom=connectivity  
 #N Geom=AllCheck Guess=Read SCRF=Check GenChk UB3LYP/6-31G(d) Freq  
 -----

Pointgroup= C1 Stoichiometry= C4H3S(2) C1[X(C4H3S)] #Atoms= 8  
 Charge = 0 Multiplicity = 2  
 -----

SCF Energy= -552.306314949 Predicted Change= -4.897337D-07  
 =====

Optimization completed. {Found 2 times}  
 Item Max Val. Criteria Pass? RMS Val. Criteria Pass?  
 Force 0.00017 || 0.00045 [ YES ] 0.00006 || 0.00030 [ YES ]  
 Displ 0.00173 || 0.00180 [ YES ] 0.00173 || 0.00180 [ YES ]  
 -----

Atomic Coordinates (Angstroms)  
 Type X Y Z  
 -----

|   |           |           |           |
|---|-----------|-----------|-----------|
| C | -2.584552 | -0.205046 | -0.000138 |
| C | -2.264711 | 1.123804  | 0.000107  |
| C | -0.845110 | 1.375366  | -0.000016 |
| C | -0.173271 | 0.198976  | -0.000011 |
| S | -1.152592 | -1.214684 | 0.000309  |
| H | -3.565497 | -0.661941 | -0.000255 |
| H | -3.008131 | 1.914748  | 0.000139  |
| H | -0.392617 | 2.359933  | -0.000073 |

-----

## Statistical Thermodynamic Analysis

Temperature= 298.150 Kelvin Pressure= 1.00000 Atm  
 =====

SCF Energy= -552.306314949 Predicted Change= -4.897337D-07  
 Zero-point correction (ZPE)= -552.2522 0.05408  
 Internal Energy (U)= -552.2480 0.05822  
 Enthalpy (H)= -552.2471 0.05916  
 Gibbs Free Energy (G)= -552.2801 0.02618  
 -----

Frequencies -- 364.1643 515.5377 605.8005

Supporting Information: **3bromo2radicalthiophene.out**

-----  
 Using Gaussian 03: IA32L-G03RevC.02 12-Jun-2004  
 =====

# opt nosymm freq ub3lyp/6-31g(d)  
 #N Geom=AllCheck Guess=Read SCRF=Check GenChk UB3LYP/6-31G(d) Freq  
 -----

Pointgroup= C1 Stoichiometry= C4H2BrS(2) C1[X(C4H2BrS)] #Atoms= 8  
 Charge = 0 Multiplicity = 2  
 -----

SCF Energy= -3123.40614137 Predicted Change= -1.279553D-07  
 =====

Optimization completed. {Found 2 times}  
 Item Max Val. Criteria Pass? RMS Val. Criteria Pass?  
 Force 0.00008 || 0.00045 [ YES ] 0.00003 || 0.00030 [ YES ]  
 Displ 0.00090 || 0.00180 [ YES ] 0.00090 || 0.00180 [ YES ]  
 -----

| Atomic<br>Type | Coordinates (Angstroms) |           |           |
|----------------|-------------------------|-----------|-----------|
|                | X                       | Y         | Z         |
| C              | 0.801610                | 2.681990  | -0.000215 |
| C              | -0.476702               | 2.203158  | 0.000307  |
| C              | -0.526426               | 0.765300  | -0.000052 |
| C              | 0.717400                | 0.236199  | -0.000183 |
| S              | 1.988686                | 1.391238  | 0.000475  |
| H              | 1.131466                | 3.712680  | -0.000366 |
| H              | -1.364602               | 2.824932  | 0.000481  |
| Br             | -2.139270               | -0.226325 | -0.000300 |

-----

Statistical Thermodynamic Analysis  
 Temperature= 298.150 Kelvin Pressure= 1.00000 Atm  
 =====

SCF Energy= -3123.40614137 Predicted Change= -1.279553D-07  
 Zero-point correction (ZPE)= -3123.3618 0.04428  
 Internal Energy (U)= -3123.3563 0.04978  
 Enthalpy (H)= -3123.3554 0.05073  
 Gibbs Free Energy (G)= -3123.3934 0.01273  
 -----

Frequencies -- 151.7125 227.9923 319.0283



Supporting Information: **3bromothiophene.out**

-----  
 Using Gaussian 03: IA32L-G03RevC.02 12-Jun-2004  
 =====

# opt=(modredundant) freq b3lyp/6-31g(d) geom=connectivity  
 #N Geom=AllCheck Guess=Read SCRF=Check GenChk RB3LYP/6-31G(d) Freq  
 -----

Pointgroup= C1 Stoichiometry= C4H3BrS C1[X(C4H3BrS)] #Atoms= 9  
 Charge = 0 Multiplicity = 1  
 -----

SCF Energy= -3124.10509619 Predicted Change= -4.467659D-08  
 =====

Optimization completed. {Found 2 times}  
 Item Max Val. Criteria Pass? RMS Val. Criteria Pass?  
 Force 0.00005 || 0.00045 [ YES ] 0.00001 || 0.00030 [ YES ]  
 Displ 0.00052 || 0.00180 [ YES ] 0.00052 || 0.00180 [ YES ]  
 -----

Atomic Coordinates (Angstroms)  
 Type X Y Z  
 -----

|    |           |           |           |
|----|-----------|-----------|-----------|
| C  | 2.073358  | 1.122617  | -0.000104 |
| C  | 0.719879  | 1.303223  | 0.000159  |
| C  | 0.022277  | 0.057037  | -0.000032 |
| C  | 0.834843  | -1.039299 | 0.000098  |
| S  | 2.502400  | -0.559839 | -0.000017 |
| H  | 2.846927  | 1.878573  | -0.000196 |
| H  | 0.226849  | 2.267536  | 0.000250  |
| H  | 0.554677  | -2.082534 | 0.000151  |
| Br | -1.873400 | -0.050503 | -0.000019 |

-----

## Statistical Thermodynamic Analysis

Temperature= 298.150 Kelvin Pressure= 1.00000 Atm  
 =====

SCF Energy= -3124.10509619 Predicted Change= -4.467659D-08  
 Zero-point correction (ZPE)= -3124.0480 0.05705  
 Internal Energy (U)= -3124.0426 0.06245  
 Enthalpy (H)= -3124.0416 0.06340  
 Gibbs Free Energy (G)= -3124.0787 0.02632  
 -----

Frequencies -- 190.8755 239.6278 318.7750

Supporting Information: **3bromothiopheneradical.out**

-----  
 Using Gaussian 03: IA32L-G03RevC.02 12-Jun-2004  
 =====

# opt nosymm freq ub3lyp/6-31g(d) geom=connectivity  
 #N Geom=AllCheck Guess=Read SCRF=Check GenChk UB3LYP/6-31G(d) Freq  
 -----

Pointgroup= C1 Stoichiometry= C4H3S(2) C1[X(C4H3S)] #Atoms= 8  
 Charge = 0 Multiplicity = 2  
 -----

SCF Energy= -552.310852239 Predicted Change= -3.327602D-07  
 =====

Optimization completed. {Found 2 times}  
 Item Max Val. Criteria Pass? RMS Val. Criteria Pass?  
 Force 0.00020 || 0.00045 [ YES ] 0.00005 || 0.00030 [ YES ]  
 Displ 0.00145 || 0.00180 [ YES ] 0.00145 || 0.00180 [ YES ]  
 -----

Atomic Coordinates (Angstroms)  
 Type X Y Z  
 -----

|   |          |           |           |
|---|----------|-----------|-----------|
| C | 2.069889 | 1.126617  | 0.000167  |
| C | 0.711755 | 1.313345  | -0.000088 |
| C | 0.053335 | 0.057790  | 0.000079  |
| C | 0.816580 | -1.053287 | 0.000314  |
| S | 2.505321 | -0.557419 | -0.000864 |
| H | 2.847348 | 1.879952  | 0.000323  |
| H | 0.225001 | 2.281138  | -0.000038 |
| H | 0.551980 | -2.100822 | 0.000415  |

-----

## Statistical Thermodynamic Analysis

Temperature= 298.150 Kelvin Pressure= 1.00000 Atm  
 =====

SCF Energy= -552.310852239 Predicted Change= -3.327602D-07  
 Zero-point correction (ZPE)= -552.2567 0.05410  
 Internal Energy (U)= -552.2526 0.05819  
 Enthalpy (H)= -552.2517 0.05913  
 Gibbs Free Energy (G)= -552.2845 0.02625  
 -----

Frequencies -- 435.0858 548.3101 598.5436

Supporting Information: **4bromo2radicalthiophene.out**

-----  
 Using Gaussian 03: IA32L-G03RevC.02 12-Jun-2004  
 =====

# opt nosymm freq ub3lyp/6-31g(d)  
 #N Geom=AllCheck Guess=Read SCRF=Check GenChk UB3LYP/6-31G(d) Freq  
 -----

Pointgroup= C1 Stoichiometry= C4H2BrS(2) C1[X(C4H2BrS)] #Atoms= 8  
 Charge = 0 Multiplicity = 2  
 -----

SCF Energy= -3123.40894829 Predicted Change= -5.191900D-07  
 =====

Optimization completed. {Found 1 times}  
 Item Max Val. Criteria Pass? RMS Val. Criteria Pass?  
 Force 0.00016 || 0.00045 [ YES ] 0.00007 || 0.00030 [ YES ]  
 Displ 0.00212 || 0.00180 [ NO ] 0.00212 || 0.00180 [ YES ]  
 -----

Atomic Coordinates (Angstroms)  
 Type X Y Z  
 -----

|    |           |           |           |
|----|-----------|-----------|-----------|
| C  | -0.914723 | 1.548105  | -0.000022 |
| C  | -1.203732 | 0.214831  | 0.000093  |
| C  | -0.057019 | -0.657602 | -0.000003 |
| C  | 1.061139  | 0.103563  | -0.000044 |
| S  | 0.818223  | 1.804836  | 0.000128  |
| H  | -1.598921 | 2.384964  | -0.000039 |
| H  | -0.107729 | -1.738466 | -0.000035 |
| Br | -2.979350 | -0.456258 | 0.000178  |

-----

## Statistical Thermodynamic Analysis

Temperature= 298.150 Kelvin Pressure= 1.00000 Atm  
 =====

SCF Energy= -3123.40894829 Predicted Change= -5.191900D-07  
 Zero-point correction (ZPE)= -3123.3646 0.04426  
 Internal Energy (U)= -3123.3592 0.04972  
 Enthalpy (H)= -3123.3582 0.05066  
 Gibbs Free Energy (G)= -3123.3961 0.01284  
 -----

Frequencies -- 184.1267 240.0294 316.0657

**Molecular Geometries: G3B3****Chlorooxatriazoles**Supporting Information: **4chloro1235oxatriazole.out**-----  
Using Gaussian 03: IA32L-G03RevC.02 12-Jun-2004  
=====

#g3b3

#N Geom=AllCheck Guess=Read SCRF=Check B3LYP/6-31G(d) Freq

#N Geom=AllCheck Guess=Read SCRF=Check QCISD(T,E4T)/6-31G(d)

#N Geom=AllCheck Guess=Read SCRF=Check MP4/6-31+G(d)

#N Geom=AllCheck Guess=Read SCRF=Check MP4/6-31G(2df,p)

#N Geom=AllCheck Guess=Read SCRF=Check MP2=Full/GTLarge  
-----

Pointgroup= C1 Stoichiometry= CCIN3O C1[X(CCIN3O)] #Atoms= 6

Charge = 0 Multiplicity = 1  
-----

SCF Energy= -735.533664014 Predicted Change= -8.973158D-07

MP2 Energy= -737.2390026327 Correl. Energy= -1.70533861  
=====

Optimization completed. {Found 2 times}

Item Max Val. Criteria Pass? RMS Val. Criteria Pass?

Force 0.00042 || 0.00045 [ YES ] 0.00014 || 0.00030 [ YES ]

Displ 0.00100 || 0.00180 [ YES ] 0.00100 || 0.00180 [ YES ]  
-----

Atomic Coordinates (Angstroms)

Type X Y Z  
-----

C -0.217092 -0.026018 -0.000404

O 1.774732 -0.658651 -0.000218

N 1.760174 0.747653 -0.000026

N 0.558459 1.117735 0.000396

N 0.498633 -1.117421 0.000448

Cl -1.918598 0.011149 -0.000092  
-----

Statistical Thermodynamic Analysis

Temperature= 298.150 Kelvin Pressure= 1.00000 Atm  
=====

SCF Energy= -735.533664014 Predicted Change= -8.973158D-07

MP2 Energy= -737.2390026327 MP2 Cor. Energy= -1.70533861

Zero-point correction (ZPE)= -737.6376 0.02386

Internal Energy (U)= -737.6333 0.02824

Enthalpy (H)= -737.6323 0.02919

Gibbs Free Energy (G)= -737.6661 -0.00461  
-----

Frequencies -- 268.8013 327.1403 512.3390

Supporting Information: **4radical1235oxatriazole.out**

-----  
 Using Gaussian 03: IA32L-G03RevC.02 12-Jun-2004  
 =====

```
#g3b3 scf=(restart,maxcycle=10000)
#N Geom=AllCheck Guess=Read SCRF=Check B3LYP/6-31G(d) Freq
#N Geom=AllCheck Guess=Read SCRF=Check QCISD(T,E4T)/6-31G(d)
#N Geom=AllCheck Guess=Read SCRF=Check MP4/6-31+G(d)
#N Geom=AllCheck Guess=Read SCRF=Check MP4/6-31G(2df,p)
#N Geom=AllCheck Guess=Read SCRF=Check MP2=Full/GTLarge
```

-----  
 Pointgroup= C1 Stoichiometry= CN3O(2) C1[X(CN3O)] #Atoms= 5  
 Charge = 0 Multiplicity = 2  
 -----

```
SCF Energy= -275.957784686 Predicted Change= -5.339650D-07
MP2 Energy= -277.0716633722 Correl. Energy= -1.11387868
=====
```

```
Optimization completed.      {Found      2      times}
Item  Max Val.  Criteria  Pass?  RMS Val.  Criteria  Pass?
Force  0.00038 || 0.00045 [ YES ]  0.00015 || 0.00030 [ YES ]
Displ  0.00087 || 0.00180 [ YES ]  0.00087 || 0.00180 [ YES ]
=====
```

```
Atomic      Coordinates (Angstroms)
Type       X          Y          Z
=====
```

```
 C      0.162179   1.112467   0.000112
 O      0.540548  -0.924534  -0.000092
 N     -0.853189  -0.724599   0.000224
 N     -1.069737   0.521895  -0.000243
 N      1.166146   0.305772   0.000029
=====
```

## Statistical Thermodynamic Analysis

Temperature= 298.150 Kelvin Pressure= 1.00000 Atm  
 =====

```
SCF Energy= -275.957784686 Predicted Change= -5.339650D-07
MP2 Energy= -277.0716633722 MP2 Cor. Energy= -1.11387868
Zero-point correction (ZPE)= -277.3510 0.02010
Internal Energy (U)= -277.3476 0.02351
Enthalpy (H)= -277.3466 0.02445
Gibbs Free Energy (G)= -277.3776 -0.00655
=====
```

```
Frequencies -- 619.1436          639.8158          684.9325
```

**Chlorotriazines**Supporting Information: **4chloro123triazine.out**-----  
Using Gaussian 03: IA32L-G03RevC.02 12-Jun-2004  
=====

# g3b3

#N Geom=AllCheck Guess=Read SCRF=Check B3LYP/6-31G(d) Freq

#N Geom=AllCheck Guess=Read SCRF=Check QCISD(T,E4T)/6-31G(d)

#N Geom=AllCheck Guess=Read SCRF=Check MP4/6-31+G(d)

#N Geom=AllCheck Guess=Read SCRF=Check MP4/6-31G(2df,p)

#N Geom=AllCheck Guess=Read SCRF=Check MP2=Full/GTLarge  
-----

Pointgroup= C1 Stoichiometry= C3H2ClN3 C1[X(C3H2ClN3)] #Atoms= 9

Charge = 0 Multiplicity = 1  
-----

SCF Energy= -737.622763334 Predicted Change= -4.307017D-07

MP2 Energy= -739.4310502797 Correl. Energy= -1.80828694  
=====

Optimization completed. {Found 2 times}

Item Max Val. Criteria Pass? RMS Val. Criteria Pass?

Force 0.00025 || 0.00045 [ YES ] 0.00006 || 0.00030 [ YES ]

Displ 0.00115 || 0.00180 [ YES ] 0.00115 || 0.00180 [ YES ]  
-----

Atomic Coordinates (Angstroms)

Type X Y Z  
-----

N -0.148023 -1.174295 0.000025

C 0.455038 0.009832 0.000010

C -0.240940 1.213303 -0.000012

C -1.618484 1.066970 -0.000019

N -2.217376 -0.135330 0.000038

H 0.253494 2.177863 -0.000004

H -2.287159 1.923753 0.000018

N -1.479651 -1.230846 -0.000010

Cl 2.198549 -0.003468 -0.000015  
-----

Statistical Thermodynamic Analysis

Temperature= 298.150 Kelvin Pressure= 1.00000 Atm  
=====

SCF Energy= -737.622763334 Predicted Change= -4.307017D-07

MP2 Energy= -739.4310502797 MP2 Cor. Energy= -1.80828694

Zero-point correction (ZPE)= -739.8371 0.05381

Internal Energy (U)= -739.8318 0.05910

Enthalpy (H)= -739.8309 0.06004

Supporting Information: **4radical123triazine.out**


---

Using Gaussian 03: IA32L-G03RevC.02 12-Jun-2004

---

# g3b3

#N Geom=AllCheck Guess=Read SCRF=Check B3LYP/6-31G(d) Freq

#N Geom=AllCheck Guess=Read SCRF=Check QCISD(T,E4T)/6-31G(d)

#N Geom=AllCheck Guess=Read SCRF=Check MP4/6-31+G(d)

#N Geom=AllCheck Guess=Read SCRF=Check MP4/6-31G(2df,p)

#N Geom=AllCheck Guess=Read SCRF=Check MP2=Full/GTLarge

---

Pointgroup= C1 Stoichiometry= C3H2N3(2) C1[X(C3H2N3)] #Atoms= 8

Charge = 0 Multiplicity = 2

---

SCF Energy= -278.044319477 Predicted Change= -1.621169D-07

MP2 Energy= -279.3260907571 Correl. Energy= -1.28177128

---

Optimization completed. {Found 2 times}

| Item  | Max Val. | Criteria | Pass?   | RMS Val. | Criteria | Pass?   |
|-------|----------|----------|---------|----------|----------|---------|
| Force | 0.00020  | 0.00045  | [ YES ] | 0.00005  | 0.00030  | [ YES ] |
| Displ | 0.00055  | 0.00180  | [ YES ] | 0.00055  | 0.00180  | [ YES ] |

---

| Atomic Type | Coordinates (Angstroms) |   |   |
|-------------|-------------------------|---|---|
|             | X                       | Y | Z |

---

|   |           |           |           |
|---|-----------|-----------|-----------|
| N | 1.076999  | -0.883127 | -0.000015 |
| C | -0.120561 | -1.340327 | 0.000001  |
| C | -1.274863 | -0.564670 | 0.000021  |
| C | -0.998661 | 0.793941  | 0.000018  |
| N | 0.264108  | 1.272523  | -0.000021 |
| H | -2.284007 | -0.962580 | 0.000004  |
| H | -1.782347 | 1.548040  | -0.000009 |
| N | 1.291873  | 0.479300  | 0.000002  |

---

## Statistical Thermodynamic Analysis

Temperature= 298.150 Kelvin Pressure= 1.00000 Atm

---

SCF Energy= -278.044319477 Predicted Change= -1.621169D-07

MP2 Energy= -279.3260907571 MP2 Cor. Energy= -1.28177128

Zero-point correction (ZPE)= -279.5674 0.05003

Internal Energy (U)= -279.5631 0.05432

Enthalpy (H)= -279.5622 0.05526

Gibbs Free Energy (G)= -279.5954 0.02200

Supporting Information: **5chloro123triazine.out**

-----  
 Using Gaussian 03: IA32L-G03RevC.02 12-Jun-2004  
 =====

# g3b3

#N Geom=AllCheck Guess=Read SCRF=Check B3LYP/6-31G(d) Freq

#N Geom=AllCheck Guess=Read SCRF=Check QCISD(T,E4T)/6-31G(d)

#N Geom=AllCheck Guess=Read SCRF=Check MP4/6-31+G(d)

#N Geom=AllCheck Guess=Read SCRF=Check MP4/6-31G(2df,p)

#N Geom=AllCheck Guess=Read SCRF=Check MP2=Full/GTLarge  
 -----

Pointgroup= C1 Stoichiometry= C3H2ClN3 C1[X(C3H2ClN3)] #Atoms= 9

Charge = 0 Multiplicity = 1  
 -----

SCF Energy= -737.620271883 Predicted Change= -2.709460D-07

MP2 Energy= -739.4287868258 Correl. Energy= -1.80851494  
 =====

Optimization completed. {Found 2 times}

| Item  | Max Val. | Criteria | Pass?   | RMS Val. | Criteria | Pass?   |
|-------|----------|----------|---------|----------|----------|---------|
| Force | 0.00018  | 0.00045  | [ YES ] | 0.00007  | 0.00030  | [ YES ] |
| Displ | 0.00065  | 0.00180  | [ YES ] | 0.00065  | 0.00180  | [ YES ] |

-----

| Atomic<br>Type | Coordinates (Angstroms) |   |   |
|----------------|-------------------------|---|---|
|                | X                       | Y | Z |

-----

|    |           |           |           |
|----|-----------|-----------|-----------|
| N  | -1.593987 | -1.154438 | 0.000006  |
| C  | -0.255087 | -1.176003 | -0.000001 |
| C  | 0.482987  | -0.000001 | -0.000004 |
| C  | -0.255089 | 1.176004  | -0.000003 |
| N  | -1.593985 | 1.154441  | 0.000010  |
| H  | 0.213170  | -2.156507 | -0.000006 |
| H  | 0.213172  | 2.156506  | 0.000000  |
| N  | -2.245496 | -0.000002 | 0.000004  |
| Cl | 2.221827  | 0.000000  | -0.000005 |

-----

## Statistical Thermodynamic Analysis

Temperature= 298.150 Kelvin Pressure= 1.00000 Atm  
 =====

SCF Energy= -737.620271883 Predicted Change= -2.709460D-07

MP2 Energy= -739.4287868258 MP2 Cor. Energy= -1.80851494

Zero-point correction (ZPE)= -739.8351 0.05393

Internal Energy (U)= -739.8298 0.05925

Enthalpy (H)= -739.8288 0.06019  
 =====



Supporting Information: **5radical123triazine.out**

-----  
 Using Gaussian 03: IA32L-G03RevC.02 12-Jun-2004  
 =====

# g3b3

#N Geom=AllCheck Guess=Read SCRF=Check B3LYP/6-31G(d) Freq

#N Geom=AllCheck Guess=Read SCRF=Check QCISD(T,E4T)/6-31G(d)

#N Geom=AllCheck Guess=Read SCRF=Check MP4/6-31+G(d)

#N Geom=AllCheck Guess=Read SCRF=Check MP4/6-31G(2df,p)

#N Geom=AllCheck Guess=Read SCRF=Check MP2=Full/GTLarge  
 -----

Pointgroup= C1 Stoichiometry= C3H2N3(2) C1[X(C3H2N3)] #Atoms= 8

Charge = 0 Multiplicity = 2  
 -----

SCF Energy= -278.038953595 Predicted Change= -3.181334D-08

MP2 Energy= -279.314530077 Correl. Energy= -1.27557648  
 =====

Optimization completed. {Found 2 times}

| Item  | Max Val. | Criteria | Pass?   | RMS Val. | Criteria | Pass?   |
|-------|----------|----------|---------|----------|----------|---------|
| Force | 0.00007  | 0.00045  | [ YES ] | 0.00002  | 0.00030  | [ YES ] |
| Displ | 0.00040  | 0.00180  | [ YES ] | 0.00040  | 0.00180  | [ YES ] |

-----

| Atomic Type | Coordinates (Angstroms) |           |           |
|-------------|-------------------------|-----------|-----------|
|             | X                       | Y         | Z         |
| N           | -1.150240               | -0.680360 | -0.000002 |
| C           | -1.179842               | 0.678881  | 0.000003  |
| C           | -0.000001               | 1.377018  | 0.000006  |
| C           | 1.179840                | 0.678882  | 0.000005  |
| N           | 1.150242                | -0.680358 | -0.000005 |
| H           | -2.171480               | 1.121196  | 0.000007  |
| H           | 2.171478                | 1.121200  | 0.000000  |
| N           | 0.000001                | -1.303723 | -0.000007 |

-----

## Statistical Thermodynamic Analysis

Temperature= 298.150 Kelvin Pressure= 1.00000 Atm  
 =====

SCF Energy= -278.038953595 Predicted Change= -3.181334D-08

MP2 Energy= -279.314530077 MP2 Cor. Energy= -1.27557648

Zero-point correction (ZPE)= -279.5618 0.05051

Internal Energy (U)= -279.5576 0.05469

Enthalpy (H)= -279.5567 0.05563

Gibbs Free Energy (G)= -279.5897 0.02257  
 -----

Supporting Information: **3chloro124triazine.out**

-----  
 Using Gaussian 03: IA32L-G03RevC.02 12-Jun-2004  
 =====

# g3b3

#N Geom=AllCheck Guess=Read SCRF=Check B3LYP/6-31G(d) Freq

#N Geom=AllCheck Guess=Read SCRF=Check QCISD(T,E4T)/6-31G(d)

#N Geom=AllCheck Guess=Read SCRF=Check MP4/6-31+G(d)

#N Geom=AllCheck Guess=Read SCRF=Check MP4/6-31G(2df,p)

#N Geom=AllCheck Guess=Read SCRF=Check MP2=Full/GTLarge  
 -----

Pointgroup= C1 Stoichiometry= C3H2ClN3 C1[X(C3H2ClN3)] #Atoms= 9

Charge = 0 Multiplicity = 1  
 -----

SCF Energy= -737.652537804 Predicted Change= -6.461034D-07

MP2 Energy= -739.4559608155 Correl. Energy= -1.80342301  
 =====

Optimization completed. {Found 2 times}

| Item  | Max Val. | Criteria | Pass?   | RMS Val. | Criteria | Pass?   |
|-------|----------|----------|---------|----------|----------|---------|
| Force | 0.00037  | 0.00045  | [ YES ] | 0.00010  | 0.00030  | [ YES ] |
| Displ | 0.00106  | 0.00180  | [ YES ] | 0.00106  | 0.00180  | [ YES ] |

-----

| Atomic Type | Coordinates (Angstroms) |   |   |
|-------------|-------------------------|---|---|
|             | X                       | Y | Z |

-----

|    |           |           |           |
|----|-----------|-----------|-----------|
| N  | 0.140906  | -1.192192 | 0.000086  |
| C  | -0.432775 | 0.012658  | 0.000224  |
| C  | 1.490888  | 1.148428  | 0.000008  |
| C  | 2.151469  | -0.083995 | -0.000006 |
| N  | 1.475133  | -1.233423 | 0.000010  |
| H  | 2.030694  | 2.093254  | -0.000006 |
| H  | 3.234233  | -0.164188 | -0.000039 |
| N  | 0.162492  | 1.204874  | 0.000088  |
| Cl | -2.174831 | 0.009034  | -0.000153 |

-----

## Statistical Thermodynamic Analysis

Temperature= 298.150 Kelvin Pressure= 1.00000 Atm  
 =====

SCF Energy= -737.652537804 Predicted Change= -6.461034D-07

MP2 Energy= -739.4559608155 MP2 Cor. Energy= -1.80342301

Zero-point correction (ZPE)= -739.8612 0.05446

Internal Energy (U)= -739.8560 0.05968

Enthalpy (H)= -739.8550 0.06062

Gibbs Free Energy (G)= -739.8909 0.02475  
 -----

Frequencies -- 150.5448 326.4030 383.6513

Supporting Information: **3radical124triazine.out**

-----  
 Using Gaussian 03: IA32L-G03RevC.02 12-Jun-2004  
 =====

# g3b3  
 #N Geom=AllCheck Guess=Read SCRF=Check B3LYP/6-31G(d) Freq  
 #N Geom=AllCheck Guess=Read SCRF=Check QCISD(T,E4T)/6-31G(d)  
 #N Geom=AllCheck Guess=Read SCRF=Check MP4/6-31+G(d)  
 #N Geom=AllCheck Guess=Read SCRF=Check MP4/6-31G(2df,p)  
 #N Geom=AllCheck Guess=Read SCRF=Check MP2=Full/GTLarge

-----  
 Pointgroup= C1 Stoichiometry= C3H2N3(2) C1[X(C3H2N3)] #Atoms= 8  
 Charge = 0 Multiplicity = 2  
 -----

SCF Energy= -278.073319705 Predicted Change= -9.430839D-07  
 MP2 Energy= -279.3457139905 Correl. Energy= -1.27239428  
 =====

Optimization completed. {Found 2 times}  
 Item Max Val. Criteria Pass? RMS Val. Criteria Pass?  
 Force 0.00028 || 0.00045 [ YES ] 0.00012 || 0.00030 [ YES ]  
 Displ 0.00137 || 0.00180 [ YES ] 0.00137 || 0.00180 [ YES ]  
 -----

Atomic Coordinates (Angstroms)  
 Type X Y Z  
 -----

|   |           |           |           |
|---|-----------|-----------|-----------|
| N | -1.275701 | -0.619460 | -0.000053 |
| C | -0.153000 | -1.294882 | -0.000082 |
| C | 1.228489  | 0.434692  | 0.000044  |
| C | 0.079752  | 1.241131  | 0.000079  |
| N | -1.150669 | 0.732366  | 0.000032  |
| H | 2.232854  | 0.853013  | 0.000064  |
| H | 0.144078  | 2.325971  | 0.000141  |
| N | 1.096601  | -0.893567 | -0.000043 |

## Statistical Thermodynamic Analysis

Temperature= 298.150 Kelvin Pressure= 1.00000 Atm  
 =====

SCF Energy= -278.073319705 Predicted Change= -9.430839D-07  
 MP2 Energy= -279.3457139905 MP2 Cor. Energy= -1.27239428  
 Zero-point correction (ZPE)= -279.5871 0.05088  
 Internal Energy (U)= -279.5829 0.05506  
 Enthalpy (H)= -279.5820 0.05600  
 Gibbs Free Energy (G)= -279.6151 0.02292  
 -----

Frequencies -- 332.4187 372.3262 567.1038

Supporting Information: **5chloro124triazine.out**

-----  
 Using Gaussian 03: IA32L-G03RevC.02 12-Jun-2004  
 =====

# g3b3

#N Geom=AllCheck Guess=Read SCRF=Check B3LYP/6-31G(d) Freq

#N Geom=AllCheck Guess=Read SCRF=Check QCISD(T,E4T)/6-31G(d)

#N Geom=AllCheck Guess=Read SCRF=Check MP4/6-31+G(d)

#N Geom=AllCheck Guess=Read SCRF=Check MP4/6-31G(2df,p)

#N Geom=AllCheck Guess=Read SCRF=Check MP2=Full/GTLarge  
 -----

Pointgroup= C1 Stoichiometry= C3H2ClN3 C1[X(C3H2ClN3)] #Atoms= 9

Charge = 0 Multiplicity = 1  
 -----

SCF Energy= -737.655703627 Predicted Change= -3.213738D-07

MP2 Energy= -739.4589245898 Correl. Energy= -1.80322096  
 =====

Optimization completed. {Found 2 times}

| Item  | Max Val. | Criteria | Pass?   | RMS Val. | Criteria | Pass?   |
|-------|----------|----------|---------|----------|----------|---------|
| Force | 0.00030  | 0.00045  | [ YES ] | 0.00007  | 0.00030  | [ YES ] |
| Displ | 0.00075  | 0.00180  | [ YES ] | 0.00075  | 0.00180  | [ YES ] |

-----

| Atomic Type | Coordinates (Angstroms) |           |           |  |
|-------------|-------------------------|-----------|-----------|--|
|             | X                       | Y         | Z         |  |
| N           | 2.233427                | 0.014811  | 0.000013  |  |
| C           | 1.507092                | -1.101042 | 0.000019  |  |
| C           | -0.456399               | -0.035631 | -0.000012 |  |
| C           | 0.250815                | 1.178227  | 0.000000  |  |
| N           | 1.579589                | 1.182984  | 0.000008  |  |
| H           | 2.063343                | -2.034402 | -0.000007 |  |
| H           | -0.248676               | 2.141875  | 0.000002  |  |
| N           | 0.164722                | -1.191845 | -0.000004 |  |
| Cl          | -2.203993               | -0.023438 | -0.000009 |  |

-----

## Statistical Thermodynamic Analysis

Temperature= 298.150 Kelvin Pressure= 1.00000 Atm  
 =====

SCF Energy= -737.655703627 Predicted Change= -3.213738D-07

MP2 Energy= -739.4589245898 MP2 Cor. Energy= -1.80322096

Zero-point correction (ZPE)= -739.8642 0.05474

Internal Energy (U)= -739.8589 0.05996

Enthalpy (H)= -739.8580 0.06091

Gibbs Free Energy (G)= -739.8939 0.02500  
 -----

Frequencies -- 158.3648 306.3032 379.8374

Supporting Information: **6chloro124triazine.out**

-----  
 Using Gaussian 03: IA32L-G03RevC.02 12-Jun-2004  
 =====

# g3b3

#N Geom=AllCheck Guess=Read SCRF=Check B3LYP/6-31G(d) Freq

#N Geom=AllCheck Guess=Read SCRF=Check QCISD(T,E4T)/6-31G(d)

#N Geom=AllCheck Guess=Read SCRF=Check MP4/6-31+G(d)

#N Geom=AllCheck Guess=Read SCRF=Check MP4/6-31G(2df,p)

#N Geom=AllCheck Guess=Read SCRF=Check MP2=Full/GTLarge  
 -----

Pointgroup= C1 Stoichiometry= C3H2ClN3 C1[X(C3H2ClN3)] #Atoms= 9

Charge = 0 Multiplicity = 1  
 -----

SCF Energy= -737.652556113 Predicted Change= -3.574766D-07

MP2 Energy= -739.4562586504 Correl. Energy= -1.80370253  
 =====

Optimization completed. {Found 2 times}

| Item  | Max Val. | Criteria | Pass?   | RMS Val. | Criteria | Pass?   |
|-------|----------|----------|---------|----------|----------|---------|
| Force | 0.00035  | 0.00045  | [ YES ] | 0.00008  | 0.00030  | [ YES ] |
| Displ | 0.00079  | 0.00180  | [ YES ] | 0.00079  | 0.00180  | [ YES ] |

-----

| Atomic Type | Coordinates (Angstroms) |           |           |
|-------------|-------------------------|-----------|-----------|
|             | X                       | Y         | Z         |
| N           | 1.495028                | -1.213194 | -0.000006 |
| C           | 2.135933                | -0.045338 | -0.000004 |
| C           | 0.258404                | 1.194713  | 0.000007  |
| C           | -0.449049               | -0.019674 | 0.000001  |
| N           | 0.155174                | -1.195471 | -0.000005 |
| H           | 3.220633                | -0.103320 | 0.000009  |
| H           | -0.254201               | 2.153935  | 0.000010  |
| N           | 1.581825                | 1.179427  | 0.000007  |
| Cl          | -2.191903               | -0.013185 | 0.000000  |

-----

## Statistical Thermodynamic Analysis

Temperature= 298.150 Kelvin Pressure= 1.00000 Atm  
 =====

SCF Energy= -737.652556113 Predicted Change= -3.574766D-07

MP2 Energy= -739.4562586504 MP2 Cor. Energy= -1.80370253

Zero-point correction (ZPE)= -739.8612 0.05462

Internal Energy (U)= -739.8560 0.05986

Enthalpy (H)= -739.8551 0.06080

Gibbs Free Energy (G)= -739.8910 0.02490  
 -----

Frequencies -- 164.8113 304.4661 391.9737

Supporting Information: **6radical124triazine.out**

-----  
 Using Gaussian 03: IA32L-G03RevC.02 12-Jun-2004  
 =====

# g3b3  
 #N Geom=AllCheck Guess=Read SCRF=Check B3LYP/6-31G(d) Freq  
 #N Geom=AllCheck Guess=Read SCRF=Check QCISD(T,E4T)/6-31G(d)  
 #N Geom=AllCheck Guess=Read SCRF=Check MP4/6-31+G(d)  
 #N Geom=AllCheck Guess=Read SCRF=Check MP4/6-31G(2df,p)  
 #N Geom=AllCheck Guess=Read SCRF=Check MP2=Full/GTLarge

-----  
 Pointgroup= C1 Stoichiometry= C3H2N3(2) C1[X(C3H2N3)] #Atoms= 8  
 Charge = 0 Multiplicity = 2  
 -----

SCF Energy= -278.073109800 Predicted Change= -7.388042D-07  
 MP2 Energy= -279.3460023944 Correl. Energy= -1.27289259  
 =====

Optimization completed. {Found 2 times}  
 Item Max Val. Criteria Pass? RMS Val. Criteria Pass?  
 Force 0.00026 || 0.00045 [ YES ] 0.00010 || 0.00030 [ YES ]  
 Displ 0.00118 || 0.00180 [ YES ] 0.00118 || 0.00180 [ YES ]  
 -----

Atomic Coordinates (Angstroms)  
 Type X Y Z  
 -----

|   |           |           |           |
|---|-----------|-----------|-----------|
| N | 1.366935  | 0.187103  | -0.000001 |
| C | 0.438947  | 1.143949  | -0.000036 |
| C | -1.345782 | -0.261407 | 0.000027  |
| C | -0.388803 | -1.291095 | 0.000002  |
| N | 0.869811  | -1.072369 | -0.000004 |
| H | 0.818821  | 2.162426  | 0.000029  |
| H | -2.418761 | -0.430427 | 0.000005  |
| N | -0.897636 | 0.988025  | 0.000005  |

## Statistical Thermodynamic Analysis

Temperature= 298.150 Kelvin Pressure= 1.00000 Atm  
 =====

SCF Energy= -278.073109800 Predicted Change= -7.388042D-07  
 MP2 Energy= -279.3460023944 MP2 Cor. Energy= -1.27289259  
 Zero-point correction (ZPE)= -279.5891 0.05118  
 Internal Energy (U)= -279.5850 0.05538  
 Enthalpy (H)= -279.5840 0.05632  
 Gibbs Free Energy (G)= -279.6171 0.02323  
 -----

Frequencies -- 337.0982 378.1195 548.6634

Supporting Information: **2chloro135triazine.out**

-----  
 Using Gaussian 03: IA32L-G03RevC.02 12-Jun-2004  
 =====

# g3b3

#N Geom=AllCheck Guess=Read SCRF=Check B3LYP/6-31G(d) Freq

#N Geom=AllCheck Guess=Read SCRF=Check QCISD(T,E4T)/6-31G(d)

#N Geom=AllCheck Guess=Read SCRF=Check MP4/6-31+G(d)

#N Geom=AllCheck Guess=Read SCRF=Check MP4/6-31G(2df,p)

#N Geom=AllCheck Guess=Read SCRF=Check MP2=Full/GTLarge  
 -----

Pointgroup= C1 Stoichiometry= C3H2ClN3 C1[X(C3H2ClN3)] #Atoms= 9

Charge = 0 Multiplicity = 1  
 -----

SCF Energy= -737.710850586 Predicted Change= -4.736104D-07

MP2 Energy= -739.5002762709 Correl. Energy= -1.78942568  
 =====

Optimization completed. {Found 2 times}

| Item  | Max Val. | Criteria | Pass?   | RMS Val. | Criteria | Pass?   |
|-------|----------|----------|---------|----------|----------|---------|
| Force | 0.00022  | 0.00045  | [ YES ] | 0.00008  | 0.00030  | [ YES ] |
| Displ | 0.00076  | 0.00180  | [ YES ] | 0.00076  | 0.00180  | [ YES ] |

-----

| Atomic Type | Coordinates (Angstroms) |   |   |
|-------------|-------------------------|---|---|
|             | X                       | Y | Z |

-----

|    |           |           |           |
|----|-----------|-----------|-----------|
| C  | 1.491945  | 1.119086  | 0.000009  |
| N  | 0.156328  | 1.189102  | -0.000004 |
| C  | -0.437962 | 0.000077  | -0.000022 |
| C  | 1.492213  | -1.118929 | -0.000008 |
| N  | 2.221755  | -0.000166 | 0.000013  |
| H  | 2.028608  | 2.065334  | 0.000013  |
| H  | 2.028072  | -2.065727 | 0.000014  |
| N  | 0.156067  | -1.189039 | 0.000000  |
| Cl | -2.180759 | -0.000017 | 0.000002  |

-----

## Statistical Thermodynamic Analysis

Temperature= 298.150 Kelvin Pressure= 1.00000 Atm  
 =====

SCF Energy= -737.710850586 Predicted Change= -4.736104D-07

MP2 Energy= -739.5002762709 MP2 Cor. Energy= -1.78942568

Zero-point correction (ZPE)= -739.9051 0.05577

Internal Energy (U)= -739.9000 0.06090

Enthalpy (H)= -739.8990 0.06185

Gibbs Free Energy (G)= -739.9348 0.02611  
 -----

Frequencies -- 155.0729 333.1210 365.9959

Supporting Information: **2radical135triazine.out**


---

Using Gaussian 03: IA32L-G03RevC.02 12-Jun-2004

---

# g3b3

#N Geom=AllCheck Guess=Read SCRF=Check B3LYP/6-31G(d) Freq

#N Geom=AllCheck Guess=Read SCRF=Check QCISD(T,E4T)/6-31G(d)

#N Geom=AllCheck Guess=Read SCRF=Check MP4/6-31+G(d)

#N Geom=AllCheck Guess=Read SCRF=Check MP4/6-31G(2df,p)

#N Geom=AllCheck Guess=Read SCRF=Check MP2=Full/GTLarge

---

Pointgroup= C1 Stoichiometry= C3H2N3(2) C1[X(C3H2N3)] #Atoms= 8

Charge = 0 Multiplicity = 2

---

SCF Energy= -278.137269321 Predicted Change= -2.411216D-07

MP2 Energy= -279.3730339892 Correl. Energy= -1.23576466

---

Optimization completed. {Found 2 times}

| Item  | Max Val. | Criteria | Pass?   | RMS Val. | Criteria | Pass?   |
|-------|----------|----------|---------|----------|----------|---------|
| Force | 0.00022  | 0.00045  | [ YES ] | 0.00007  | 0.00030  | [ YES ] |
| Displ | 0.00043  | 0.00180  | [ YES ] | 0.00043  | 0.00180  | [ YES ] |

---

| Atomic Type | Coordinates (Angstroms) |   |   |
|-------------|-------------------------|---|---|
|             | X                       | Y | Z |

---

|   |           |           |           |
|---|-----------|-----------|-----------|
| C | -1.126402 | 0.589446  | -0.000003 |
| N | -1.184962 | -0.755673 | -0.000007 |
| C | 0.000012  | -1.315448 | -0.000019 |
| C | 1.126378  | 0.589499  | 0.000030  |
| N | 0.000033  | 1.305145  | 0.000014  |
| H | -2.069675 | 1.131481  | 0.000012  |
| H | 2.069719  | 1.131417  | -0.000009 |
| N | 1.184932  | -0.755741 | -0.000014 |

---

## Statistical Thermodynamic Analysis

Temperature= 298.150 Kelvin Pressure= 1.00000 Atm

---

SCF Energy= -278.137269321 Predicted Change= -2.411216D-07

MP2 Energy= -279.3730339892 MP2 Cor. Energy= -1.23576466

Zero-point correction (ZPE)= -279.6322 0.05231

Internal Energy (U)= -279.6281 0.05640

Enthalpy (H)= -279.6271 0.05735

Gibbs Free Energy (G)= -279.6601 0.02441

---

Frequencies -- 326.7783 388.1746 643.2910



**Chlorotriazoles**Supporting Information: **4chloro123triazole.out**-----  
Using Gaussian 03: IA32L-G03RevC.02 12-Jun-2004  
=====

# g3b3

#N Geom=AllCheck Guess=Read SCRF=Check B3LYP/6-31G(d) Freq

#N Geom=AllCheck Guess=Read SCRF=Check QCISD(T,E4T)/6-31G(d)

#N Geom=AllCheck Guess=Read SCRF=Check MP4/6-31+G(d)

#N Geom=AllCheck Guess=Read SCRF=Check MP4/6-31G(2df,p)

#N Geom=AllCheck Guess=Read SCRF=Check MP2=Full/GTLarge  
-----

Pointgroup= C1 Stoichiometry= C2H2ClN3 C1[X(C2H2ClN3)] #Atoms= 8

Charge = 0 Multiplicity = 1  
-----

SCF Energy= -699.771239885 Predicted Change= -1.333465D-07

MP2 Energy= -701.402708893 Correl. Energy= -1.631469  
=====

Optimization completed. {Found 2 times}

Item Max Val. Criteria Pass? RMS Val. Criteria Pass?

Force 0.00018 || 0.00045 [ YES ] 0.00005 || 0.00030 [ YES ]

Displ 0.00077 || 0.00180 [ YES ] 0.00077 || 0.00180 [ YES ]  
-----

Atomic Coordinates (Angstroms)

Type X Y Z  
-----

C -0.594780 1.102093 0.000051

C 0.248913 0.012833 -0.000018

N -1.821740 0.526064 0.000110

H -2.731218 0.967993 0.000178

H -0.423623 2.166417 0.000054

N -1.745961 -0.821011 0.000020

Cl 1.973493 0.010591 -0.000103

N -0.477918 -1.134197 0.000059  
-----

Statistical Thermodynamic Analysis

Temperature= 298.150 Kelvin Pressure= 1.00000 Atm  
=====

SCF Energy= -699.771239885 Predicted Change= -1.333465D-07

MP2 Energy= -701.402708893 MP2 Cor. Energy= -1.631469

Zero-point correction (ZPE)= -701.7630 0.04969

Internal Energy (U)= -701.7584 0.05430

Enthalpy (H)= -701.7575 0.05525

Gibbs Free Energy (G)= -701.7916 0.02108

Supporting Information: **4radical123triazole.out**

-----  
 Using Gaussian 03: IA32L-G03RevC.02 12-Jun-2004  
 =====

```
# g3b3 scf=maxcycle=1000
#N Geom=AllCheck Guess=Read SCRF=Check B3LYP/6-31G(d) Freq
#N Geom=AllCheck Guess=Read SCRF=Check QCISD(T,E4T)/6-31G(d)
#N Geom=AllCheck Guess=Read SCRF=Check MP4/6-31+G(d)
#N Geom=AllCheck Guess=Read SCRF=Check MP4/6-31G(2df,p)
#N Geom=AllCheck Guess=Read SCRF=Check MP2=Full/GTLarge
```

-----  
 Pointgroup= C1 Stoichiometry= C2H2N3(2) C1[X(C2H2N3)] #Atoms= 7  
 Charge = 0 Multiplicity = 2  
 -----

```
SCF Energy= -240.188033917 Predicted Change= -1.575899D-08
MP2 Energy= -241.2570784254 Correl. Energy= -1.0690445
=====
```

```
Optimization completed.      {Found 2 times}
Item  Max Val.  Criteria  Pass?  RMS Val.  Criteria  Pass?
Force  0.00005 || 0.00045 [ YES ]  0.00001 || 0.00030 [ YES ]
Displ  0.00027 || 0.00180 [ YES ]  0.00027 || 0.00180 [ YES ]
-----
```

```
Atomic      Coordinates (Angstroms)
Type        X          Y          Z
-----
```

```
 C    1.048294  -0.518013  -0.000002
  C   -0.157671  -1.181347  -0.000045
  N    0.646242   0.781594   0.000049
  H    1.206292   1.624412   0.000097
  H    2.079612  -0.830381   0.000008
  N   -0.700324   0.897571   0.000038
  N   -1.178724  -0.336004  -0.000061
-----
```

## Statistical Thermodynamic Analysis

Temperature= 298.150 Kelvin Pressure= 1.00000 Atm  
 =====

```
SCF Energy= -240.188033917 Predicted Change= -1.575899D-08
MP2 Energy= -241.2570784254 MP2 Cor. Energy= -1.0690445
Zero-point correction (ZPE)= -241.4772 0.04626
Internal Energy (U)= -241.4736 0.04982
Enthalpy (H)= -241.4727 0.05077
Gibbs Free Energy (G)= -241.5039 0.01953
-----
```

```
Frequencies -- 581.8439          612.2479          713.3502
```

Supporting Information: **5chloro123triazole.out**

-----  
 Using Gaussian 03: IA32L-G03RevC.02 12-Jun-2004  
 =====

# g3b3

#N Geom=AllCheck Guess=Read SCRF=Check B3LYP/6-31G(d) Freq

#N Geom=AllCheck Guess=Read SCRF=Check QCISD(T,E4T)/6-31G(d)

#N Geom=AllCheck Guess=Read SCRF=Check MP4/6-31+G(d)

#N Geom=AllCheck Guess=Read SCRF=Check MP4/6-31G(2df,p)

#N Geom=AllCheck Guess=Read SCRF=Check MP2=Full/GTLarge  
 -----

Pointgroup= C1 Stoichiometry= C2H2ClN3 C1[X(C2H2ClN3)] #Atoms= 8

Charge = 0 Multiplicity = 1  
 -----

SCF Energy= -699.769350414 Predicted Change= -8.518930D-08

MP2 Energy= -701.4003558672 Correl. Energy= -1.63100545  
 =====

Optimization completed. {Found 2 times}

| Item  | Max Val. | Criteria | Pass?   | RMS Val. | Criteria | Pass?   |
|-------|----------|----------|---------|----------|----------|---------|
| Force | 0.00013  | 0.00045  | [ YES ] | 0.00004  | 0.00030  | [ YES ] |
| Displ | 0.00048  | 0.00180  | [ YES ] | 0.00048  | 0.00180  | [ YES ] |

-----

| Atomic<br>Type | Coordinates (Angstroms) |   |   |
|----------------|-------------------------|---|---|
|                | X                       | Y | Z |

-----

|    |           |           |           |
|----|-----------|-----------|-----------|
| C  | 0.241480  | 0.081935  | 0.000002  |
| C  | -0.646176 | 1.133456  | 0.000090  |
| N  | -0.544276 | -1.023093 | -0.000067 |
| H  | -0.268348 | -1.996074 | -0.000128 |
| H  | -0.450128 | 2.194757  | 0.000169  |
| N  | -1.853252 | -0.684488 | 0.000017  |
| Cl | 1.958387  | 0.007128  | 0.000021  |
| N  | -1.909034 | 0.620124  | -0.000086 |

-----

## Statistical Thermodynamic Analysis

Temperature= 298.150 Kelvin Pressure= 1.00000 Atm  
 =====

SCF Energy= -699.769350414 Predicted Change= -8.518930D-08

MP2 Energy= -701.4003558672 MP2 Cor. Energy= -1.63100545

Zero-point correction (ZPE)= -701.7608 0.04969

Internal Energy (U)= -701.7561 0.05434

Enthalpy (H)= -701.7552 0.05529

Gibbs Free Energy (G)= -701.7895 0.02101

Supporting Information: **5radical123triazole.out**

-----  
 Using Gaussian 03: IA32L-G03RevC.02 12-Jun-2004  
 =====

# g3b3  
 #N Geom=AllCheck Guess=Read SCRF=Check B3LYP/6-31G(d) Freq  
 #N Geom=AllCheck Guess=Read SCRF=Check QCISD(T,E4T)/6-31G(d)  
 #N Geom=AllCheck Guess=Read SCRF=Check MP4/6-31+G(d)  
 #N Geom=AllCheck Guess=Read SCRF=Check MP4/6-31G(2df,p)  
 #N Geom=AllCheck Guess=Read SCRF=Check MP2=Full/GTLarge

-----  
 Pointgroup= C1 Stoichiometry= C2H2N3(2) C1[X(C2H2N3)] #Atoms= 7  
 Charge = 0 Multiplicity = 2  
 -----

SCF Energy= -240.186584557 Predicted Change= -2.441715D-07  
 MP2 Energy= -241.2557274986 Correl. Energy= -1.06914294  
 =====

Optimization completed. {Found 2 times}  
 Item Max Val. Criteria Pass? RMS Val. Criteria Pass?  
 Force 0.00016 || 0.00045 [ YES ] 0.00007 || 0.00030 [ YES ]  
 Displ 0.00047 || 0.00180 [ YES ] 0.00047 || 0.00180 [ YES ]  
 -----

Atomic Coordinates (Angstroms)  
 Type X Y Z  
 -----

|   |           |           |           |
|---|-----------|-----------|-----------|
| C | 0.031884  | -1.177019 | -0.000014 |
| C | 1.134894  | -0.360363 | 0.000051  |
| N | -1.041936 | -0.367624 | -0.000001 |
| H | -2.025466 | -0.598536 | -0.000037 |
| H | 2.187229  | -0.593690 | 0.000155  |
| N | -0.647515 | 0.931950  | -0.000229 |
| N | 0.666247  | 0.923748  | 0.000182  |

## Statistical Thermodynamic Analysis

Temperature= 298.150 Kelvin Pressure= 1.00000 Atm  
 =====

SCF Energy= -240.186584557 Predicted Change= -2.441715D-07  
 MP2 Energy= -241.2557274986 MP2 Cor. Energy= -1.06914294  
 Zero-point correction (ZPE)= -241.4748 0.04619  
 Internal Energy (U)= -241.4712 0.04978  
 Enthalpy (H)= -241.4702 0.05073  
 Gibbs Free Energy (G)= -241.5015 0.01943  
 -----

Frequencies -- 507.8546 614.1482 719.8555

**Chlorooxadiazoles**Supporting Information: **3chloro124oxadiazole.out**-----  
Using Gaussian 03: IA32L-G03RevC.02 12-Jun-2004  
=====

# g3b3

#N Geom=AllCheck Guess=Read SCRF=Check B3LYP/6-31G(d) Freq

#N Geom=AllCheck Guess=Read SCRF=Check QCISD(T,E4T)/6-31G(d)

#N Geom=AllCheck Guess=Read SCRF=Check MP4/6-31+G(d)

#N Geom=AllCheck Guess=Read SCRF=Check MP4/6-31G(2df,p)

#N Geom=AllCheck Guess=Read SCRF=Check MP2=Full/GTLarge  
-----

Pointgroup= C1 Stoichiometry= C2HCIN2O C1[X(C2HCIN2O)] #Atoms= 7

Charge = 0 Multiplicity = 1  
-----

SCF Energy= -719.608160449 Predicted Change= -1.343531D-07

MP2 Energy= -721.2534641241 Correl. Energy= -1.64530367  
=====

Optimization completed. {Found 2 times}

Item Max Val. Criteria Pass? RMS Val. Criteria Pass?

Force 0.00019 || 0.00045 [ YES ] 0.00004 || 0.00030 [ YES ]

Displ 0.00052 || 0.00180 [ YES ] 0.00052 || 0.00180 [ YES ]  
-----

Atomic Coordinates (Angstroms)

Type X Y Z  
-----

C -1.733483 0.646302 0.000009

C 0.218432 -0.003227 0.000103

H -2.676768 1.175628 -0.000066

N -0.442959 -1.134116 0.000060

O -1.779144 -0.690249 0.000071

Cl 1.932155 0.024828 -0.000086

N -0.535099 1.143521 -0.000018  
-----

Statistical Thermodynamic Analysis

Temperature= 298.150 Kelvin Pressure= 1.00000 Atm  
=====

SCF Energy= -719.608160449 Predicted Change= -1.343531D-07

MP2 Energy= -721.2534641241 MP2 Cor. Energy= -1.64530367

Zero-point correction (ZPE)= -721.6381 0.03713

Internal Energy (U)= -721.6337 0.04153

Enthalpy (H)= -721.6327 0.04247

Gibbs Free Energy (G)= -721.6666 0.00865  
-----

Frequencies -- 261.6553 332.9115 504.8612

Supporting Information: **3radical124oxadiazole.out**

-----  
 Using Gaussian 03: IA32L-G03RevC.02 12-Jun-2004  
 =====

# g3b3

#N Geom=AllCheck Guess=Read SCRF=Check B3LYP/6-31G(d) Freq

#N Geom=AllCheck Guess=Read SCRF=Check QCISD(T,E4T)/6-31G(d)

#N Geom=AllCheck Guess=Read SCRF=Check MP4/6-31+G(d)

#N Geom=AllCheck Guess=Read SCRF=Check MP4/6-31G(2df,p)

#N Geom=AllCheck Guess=Read SCRF=Check MP2=Full/GTLarge  
 -----

Pointgroup= C1 Stoichiometry= C2HN2O(2) C1[X(C2HN2O)] #Atoms= 6

Charge = 0 Multiplicity = 2  
 -----

SCF Energy= -260.024940986 Predicted Change= -1.841096D-07

MP2 Energy= -261.1265798345 Correl. Energy= -1.10163884  
 =====

Optimization completed. {Found 2 times}

| Item  | Max Val. | Criteria | Pass?   | RMS Val. | Criteria | Pass?   |
|-------|----------|----------|---------|----------|----------|---------|
| Force | 0.00014  | 0.00045  | [ YES ] | 0.00006  | 0.00030  | [ YES ] |
| Displ | 0.00045  | 0.00180  | [ YES ] | 0.00045  | 0.00180  | [ YES ] |

-----

| Atomic Type | Coordinates (Angstroms) |           |           |
|-------------|-------------------------|-----------|-----------|
|             | X                       | Y         | Z         |
| C           | -0.920446               | 0.466294  | -0.000075 |
| C           | 0.440099                | -1.041020 | 0.000031  |
| H           | -1.787721               | 1.113664  | 0.000040  |
| N           | 1.244434                | -0.033360 | -0.000246 |
| O           | 0.278709                | 1.054265  | 0.000178  |
| N           | -0.895845               | -0.837987 | 0.000075  |

-----

## Statistical Thermodynamic Analysis

Temperature= 298.150 Kelvin Pressure= 1.00000 Atm  
 =====

SCF Energy= -260.024940986 Predicted Change= -1.841096D-07

MP2 Energy= -261.1265798345 MP2 Cor. Energy= -1.10163884

Zero-point correction (ZPE)= -261.3548 0.03332

Internal Energy (U)= -261.3514 0.03678

Enthalpy (H)= -261.3504 0.03772

Gibbs Free Energy (G)= -261.3815 0.00663  
 -----

Frequencies -- 593.2497 651.2468 692.3959

Supporting Information: **5chloro124oxadiazole.out**

-----  
 Using Gaussian 03: IA32L-G03RevC.02 12-Jun-2004  
 =====

# g3b3

#N Geom=AllCheck Guess=Read SCRF=Check B3LYP/6-31G(d) Freq

#N Geom=AllCheck Guess=Read SCRF=Check QCISD(T,E4T)/6-31G(d)

#N Geom=AllCheck Guess=Read SCRF=Check MP4/6-31+G(d)

#N Geom=AllCheck Guess=Read SCRF=Check MP4/6-31G(2df,p)

#N Geom=AllCheck Guess=Read SCRF=Check MP2=Full/GTLarge  
 -----

Pointgroup= C1 Stoichiometry= C2HCIN2O C1[X(C2HCIN2O)] #Atoms= 7

Charge = 0 Multiplicity = 1  
 -----

SCF Energy= -719.608223713 Predicted Change= -2.555323D-07

MP2 Energy= -721.253271782 Correl. Energy= -1.64504806  
 =====

Optimization completed. {Found 2 times}

| Item  | Max Val. | Criteria | Pass?   | RMS Val. | Criteria | Pass?   |
|-------|----------|----------|---------|----------|----------|---------|
| Force | 0.00026  | 0.00045  | [ YES ] | 0.00006  | 0.00030  | [ YES ] |
| Displ | 0.00050  | 0.00180  | [ YES ] | 0.00050  | 0.00180  | [ YES ] |

-----

| Atomic Type | Coordinates (Angstroms) |           |           |
|-------------|-------------------------|-----------|-----------|
|             | X                       | Y         | Z         |
| C           | -0.206234               | 0.092088  | -0.000177 |
| C           | 1.791335                | 0.586009  | -0.000169 |
| N           | 1.828490                | -0.720857 | 0.000173  |
| H           | 2.701850                | 1.170580  | 0.000014  |
| O           | 0.458981                | -1.068991 | -0.000030 |
| Cl          | -1.909007               | 0.016741  | -0.000056 |
| N           | 0.538484                | 1.153453  | 0.000292  |

-----

## Statistical Thermodynamic Analysis

Temperature= 298.150 Kelvin Pressure= 1.00000 Atm  
 =====

SCF Energy= -719.608223713 Predicted Change= -2.555323D-07

MP2 Energy= -721.253271782 MP2 Cor. Energy= -1.64504806

Zero-point correction (ZPE)= -721.6377 0.03713

Internal Energy (U)= -721.6333 0.04154

Enthalpy (H)= -721.6323 0.04249

Gibbs Free Energy (G)= -721.6662 0.00864  
 -----

Frequencies -- 245.0276 327.3837 511.0733

Supporting Information: **5radical124oxadiazole.out**

-----  
 Using Gaussian 03: IA32L-G03RevC.02 12-Jun-2004  
 =====

# g3b3

#N Geom=AllCheck Guess=Read SCRF=Check B3LYP/6-31G(d) Freq

#N Geom=AllCheck Guess=Read SCRF=Check QCISD(T,E4T)/6-31G(d)

#N Geom=AllCheck Guess=Read SCRF=Check MP4/6-31+G(d)

#N Geom=AllCheck Guess=Read SCRF=Check MP4/6-31G(2df,p)

#N Geom=AllCheck Guess=Read SCRF=Check MP2=Full/GTLarge  
 -----

Pointgroup= C1 Stoichiometry= C2HN2O(2) C1[X(C2HN2O)] #Atoms= 6

Charge = 0 Multiplicity = 2  
 -----

SCF Energy= -260.024172056 Predicted Change= -3.446604D-07

MP2 Energy= -261.1284562221 Correl. Energy= -1.10428416  
 =====

Optimization completed. {Found 2 times}

| Item  | Max Val. | Criteria | Pass?   | RMS Val. | Criteria | Pass?   |
|-------|----------|----------|---------|----------|----------|---------|
| Force | 0.00030  | 0.00045  | [ YES ] | 0.00010  | 0.00030  | [ YES ] |
| Displ | 0.00049  | 0.00180  | [ YES ] | 0.00049  | 0.00180  | [ YES ] |

-----

| Atomic Type | Coordinates (Angstroms) |           |           |
|-------------|-------------------------|-----------|-----------|
|             | X                       | Y         | Z         |
| C           | 0.350134                | -1.055563 | -0.000011 |
| C           | -0.889956               | 0.558297  | 0.000037  |
| N           | 0.289957                | 1.121758  | 0.000005  |
| H           | -1.790021               | 1.159505  | 0.000049  |
| O           | 1.171160                | -0.029329 | -0.000043 |
| N           | -0.910004               | -0.827655 | 0.000015  |

-----

## Statistical Thermodynamic Analysis

Temperature= 298.150 Kelvin Pressure= 1.00000 Atm  
 =====

SCF Energy= -260.024172056 Predicted Change= -3.446604D-07

MP2 Energy= -261.1284562221 MP2 Cor. Energy= -1.10428416

Zero-point correction (ZPE)= -261.3542 0.03339

Internal Energy (U)= -261.3508 0.03684

Enthalpy (H)= -261.3498 0.03778

Gibbs Free Energy (G)= -261.3809 0.00669  
 -----

Frequencies -- 599.0670 633.8367 720.0565



**Chlorotriazoles**Supporting Information: **3chloro124triazole.out**-----  
Using Gaussian 03: IA32L-G03RevC.02 12-Jun-2004  
=====

# g3b3

#N Geom=AllCheck Guess=Read SCRF=Check B3LYP/6-31G(d) Freq

#N Geom=AllCheck Guess=Read SCRF=Check QCISD(T,E4T)/6-31G(d)

#N Geom=AllCheck Guess=Read SCRF=Check MP4/6-31+G(d)

#N Geom=AllCheck Guess=Read SCRF=Check MP4/6-31G(2df,p)

#N Geom=AllCheck Guess=Read SCRF=Check MP2=Full/GTLarge  
-----

Pointgroup= C1 Stoichiometry= C2H2ClN3 C1[X(C2H2ClN3)] #Atoms= 8

Charge = 0 Multiplicity = 1  
-----

SCF Energy= -699.809075718 Predicted Change= -5.503141D-07

MP2 Energy= -701.4298720307 Correl. Energy= -1.62079631  
=====

Optimization completed. {Found 2 times}

Item Max Val. Criteria Pass? RMS Val. Criteria Pass?

Force 0.00037 || 0.00045 [ YES ] 0.00012 || 0.00030 [ YES ]

Displ 0.00061 || 0.00180 [ YES ] 0.00061 || 0.00180 [ YES ]  
-----

Atomic Coordinates (Angstroms)

Type X Y Z  
-----

C 1.738224 0.704206 0.000063

C -0.225201 0.006226 0.000035

N 1.737549 -0.645831 -0.000045

H 2.512158 -1.294664 -0.000121

H 2.637665 1.304650 0.000106

Cl -1.948386 0.000717 -0.000001

N 0.465771 -1.123382 -0.000076

N 0.495908 1.157104 0.000043  
-----

Statistical Thermodynamic Analysis

Temperature= 298.150 Kelvin Pressure= 1.00000 Atm  
=====

SCF Energy= -699.809075718 Predicted Change= -5.503141D-07

MP2 Energy= -701.4298720307 MP2 Cor. Energy= -1.62079631

Zero-point correction (ZPE)= -701.7902 0.05037

Internal Energy (U)= -701.7856 0.05492

Enthalpy (H)= -701.7847 0.05587

Gibbs Free Energy (G)= -701.8187 0.02183  
-----

Frequencies -- 260.6478 336.3849 503.9062

Supporting Information: **3radical124triazole.out**

-----  
 Using Gaussian 03: IA32L-G03RevC.02 12-Jun-2004  
 =====

# g3b3  
 #N Geom=AllCheck Guess=Read SCRF=Check B3LYP/6-31G(d) Freq  
 #N Geom=AllCheck Guess=Read SCRF=Check QCISD(T,E4T)/6-31G(d)  
 #N Geom=AllCheck Guess=Read SCRF=Check MP4/6-31+G(d)  
 #N Geom=AllCheck Guess=Read SCRF=Check MP4/6-31G(2df,p)  
 #N Geom=AllCheck Guess=Read SCRF=Check MP2=Full/GTLarge

-----  
 Pointgroup= C1 Stoichiometry= C2H2N3(2) C1[X(C2H2N3)] #Atoms= 7  
 Charge = 0 Multiplicity = 2  
 -----

SCF Energy= -240.224956454 Predicted Change= -1.306150D-07  
 MP2 Energy= -241.304202104 Correl. Energy= -1.07924565  
 =====

Optimization completed. {Found 2 times}  
 Item Max Val. Criteria Pass? RMS Val. Criteria Pass?  
 Force 0.00020 || 0.00045 [ YES ] 0.00006 || 0.00030 [ YES ]  
 Displ 0.00034 || 0.00180 [ YES ] 0.00034 || 0.00180 [ YES ]  
 -----

Atomic Coordinates (Angstroms)  
 Type X Y Z  
 -----

|   |           |           |           |
|---|-----------|-----------|-----------|
| C | 0.713912  | 0.783427  | -0.000090 |
| C | -0.003667 | -1.151326 | -0.000006 |
| N | -0.637437 | 0.802165  | 0.000079  |
| H | -1.274163 | 1.587582  | 0.000159  |
| H | 1.325279  | 1.675937  | -0.000131 |
| N | -1.129246 | -0.480980 | 0.000004  |
| N | 1.150599  | -0.472061 | -0.000005 |

## Statistical Thermodynamic Analysis

Temperature= 298.150 Kelvin Pressure= 1.00000 Atm  
 =====

SCF Energy= -240.224956454 Predicted Change= -1.306150D-07  
 MP2 Energy= -241.304202104 MP2 Cor. Energy= -1.07924565  
 Zero-point correction (ZPE)= -241.5047 0.04680  
 Internal Energy (U)= -241.5011 0.05036  
 Enthalpy (H)= -241.5002 0.05131  
 Gibbs Free Energy (G)= -241.5314 0.02007  
 -----

Frequencies -- 517.4302 647.4172 672.0637

Supporting Information: **5chloro124triazole.out**

-----  
 Using Gaussian 03: IA32L-G03RevC.02 12-Jun-2004  
 =====

# g3b3

#N Geom=AllCheck Guess=Read SCRF=Check B3LYP/6-31G(d) Freq

#N Geom=AllCheck Guess=Read SCRF=Check QCISD(T,E4T)/6-31G(d)

#N Geom=AllCheck Guess=Read SCRF=Check MP4/6-31+G(d)

#N Geom=AllCheck Guess=Read SCRF=Check MP4/6-31G(2df,p)

#N Geom=AllCheck Guess=Read SCRF=Check MP2=Full/GTLarge  
 -----

Pointgroup= C1 Stoichiometry= C2H2ClN3 C1[X(C2H2ClN3)] #Atoms= 8

Charge = 0 Multiplicity = 1  
 -----

SCF Energy= -699.808720889 Predicted Change= -7.420284D-07

MP2 Energy= -701.4295231225 Correl. Energy= -1.62080223  
 =====

Optimization completed. {Found 2 times}

| Item  | Max Val. | Criteria | Pass?   | RMS Val. | Criteria | Pass?   |
|-------|----------|----------|---------|----------|----------|---------|
| Force | 0.00037  | 0.00045  | [ YES ] | 0.00013  | 0.00030  | [ YES ] |
| Displ | 0.00076  | 0.00180  | [ YES ] | 0.00076  | 0.00180  | [ YES ] |

-----

| Atomic Type | Coordinates (Angstroms) |           |           |  |
|-------------|-------------------------|-----------|-----------|--|
|             | X                       | Y         | Z         |  |
| C           | 0.217301                | -0.084068 | 0.000007  |  |
| C           | -1.792176               | -0.629191 | 0.000064  |  |
| N           | -0.541794               | 1.033936  | 0.000054  |  |
| H           | -0.255388               | 2.002835  | 0.000105  |  |
| N           | -1.857101               | 0.694168  | 0.000046  |  |
| H           | -2.683707               | -1.240715 | 0.000043  |  |
| Cl          | 1.936253                | -0.026379 | -0.000032 |  |
| N           | -0.533671               | -1.161551 | -0.000104 |  |

-----

## Statistical Thermodynamic Analysis

Temperature= 298.150 Kelvin Pressure= 1.00000 Atm  
 =====

SCF Energy= -699.808720889 Predicted Change= -7.420284D-07

MP2 Energy= -701.4295231225 MP2 Cor. Energy= -1.62080223

Zero-point correction (ZPE)= -701.7896 0.05046

Internal Energy (U)= -701.7850 0.05505

Enthalpy (H)= -701.7841 0.05600

Gibbs Free Energy (G)= -701.8182 0.02187  
 -----

Frequencies -- 248.5808 318.4567 500.2053

Supporting Information: **5radical124triazole.out**

-----  
 Using Gaussian 03: IA32L-G03RevC.02 12-Jun-2004  
 =====

# g3b3

#N Geom=AllCheck Guess=Read SCRF=Check B3LYP/6-31G(d) Freq

#N Geom=AllCheck Guess=Read SCRF=Check QCISD(T,E4T)/6-31G(d)

#N Geom=AllCheck Guess=Read SCRF=Check MP4/6-31+G(d)

#N Geom=AllCheck Guess=Read SCRF=Check MP4/6-31G(2df,p)

#N Geom=AllCheck Guess=Read SCRF=Check MP2=Full/GTLarge  
 -----

Pointgroup= C1 Stoichiometry= C2H2N3(2) C1[X(C2H2N3)] #Atoms= 7

Charge = 0 Multiplicity = 2  
 -----

SCF Energy= -240.224542887 Predicted Change= -8.991566D-08

MP2 Energy= -241.3050413938 Correl. Energy= -1.0804985  
 =====

Optimization completed. {Found 2 times}

| Item  | Max Val. | Criteria | Pass?   | RMS Val. | Criteria | Pass?   |
|-------|----------|----------|---------|----------|----------|---------|
| Force | 0.00013  | 0.00045  | [ YES ] | 0.00005  | 0.00030  | [ YES ] |
| Displ | 0.00039  | 0.00180  | [ YES ] | 0.00039  | 0.00180  | [ YES ] |

-----

| Atomic Type | Coordinates (Angstroms) |   |   |
|-------------|-------------------------|---|---|
|             | X                       | Y | Z |

-----

|   |           |           |           |
|---|-----------|-----------|-----------|
| C | -0.217386 | -1.127373 | 0.000029  |
| C | 0.853627  | 0.644159  | 0.000072  |
| N | -1.094689 | -0.109860 | 0.000030  |
| H | -2.103350 | -0.114211 | 0.000015  |
| N | -0.399019 | 1.073603  | -0.000198 |
| H | 1.689977  | 1.329341  | 0.000076  |
| N | 1.007412  | -0.723150 | 0.000068  |

-----

## Statistical Thermodynamic Analysis

Temperature= 298.150 Kelvin Pressure= 1.00000 Atm  
 =====

SCF Energy= -240.224542887 Predicted Change= -8.991566D-08

MP2 Energy= -241.3050413938 MP2 Cor. Energy= -1.0804985

Zero-point correction (ZPE)= -241.5057 0.04701

Internal Energy (U)= -241.5021 0.05061

Enthalpy (H)= -241.5011 0.05155

Gibbs Free Energy (G)= -241.5324 0.02025  
 -----

Frequencies -- 457.6395 637.0827 684.0356

**Chlorooxadiazoles**Supporting Information: **3chloro125oxadiazole.out**-----  
Using Gaussian 03: IA32L-G03RevC.02 12-Jun-2004  
=====

# g3b3

#N Geom=AllCheck Guess=Read SCRF=Check B3LYP/6-31G(d) Freq

#N Geom=AllCheck Guess=Read SCRF=Check QCISD(T,E4T)/6-31G(d)

#N Geom=AllCheck Guess=Read SCRF=Check MP4/6-31+G(d)

#N Geom=AllCheck Guess=Read SCRF=Check MP4/6-31G(2df,p)

#N Geom=AllCheck Guess=Read SCRF=Check MP2=Full/GTLarge  
-----

Pointgroup= C1 Stoichiometry= C2HCIN2O C1[X(C2HCIN2O)] #Atoms= 7

Charge = 0 Multiplicity = 1  
-----

SCF Energy= -719.550585676 Predicted Change= -3.695128D-07

MP2 Energy= -721.2120601195 Correl. Energy= -1.66147444  
=====

Optimization completed. {Found 2 times}

Item Max Val. Criteria Pass? RMS Val. Criteria Pass?

Force 0.00021 || 0.00045 [ YES ] 0.00007 || 0.00030 [ YES ]

Displ 0.00150 || 0.00180 [ YES ] 0.00150 || 0.00180 [ YES ]  
-----

Atomic Coordinates (Angstroms)

Type X Y Z  
-----

|    |           |           |           |
|----|-----------|-----------|-----------|
| C  | 0.645557  | 1.106772  | 0.000008  |
| C  | -0.238899 | -0.011300 | -0.000068 |
| H  | 0.419660  | 2.163179  | 0.000065  |
| N  | 0.452670  | -1.119592 | 0.000177  |
| O  | 1.762246  | -0.710507 | -0.000265 |
| Cl | -1.954290 | 0.009218  | 0.000015  |
| N  | 1.870952  | 0.661212  | 0.000132  |

-----  
Statistical Thermodynamic AnalysisTemperature= 298.150 Kelvin Pressure= 1.00000 Atm  
=====

SCF Energy= -719.550585676 Predicted Change= -3.695128D-07

MP2 Energy= -721.2120601195 MP2 Cor. Energy= -1.66147444

Zero-point correction (ZPE)= -721.5982 0.03640

Internal Energy (U)= -721.5937 0.04088

Enthalpy (H)= -721.5928 0.04182

Gibbs Free Energy (G)= -721.6268 0.00784  
-----

Frequencies -- 266.1597 308.9122 495.9115

Supporting Information: **3radical125oxadiazole3.out**


---

Using Gaussian 03: IA32L-G03RevC.02 12-Jun-2004

---

```
# g3b3 scf=maxcycle=5000
#N Geom=AllCheck Guess=Read SCRF=Check B3LYP/6-31G(d) Freq
#N Geom=AllCheck Guess=Read SCRF=Check QCISD(T,E4T)/6-31G(d)
#N Geom=AllCheck Guess=Read SCRF=Check MP4/6-31+G(d)
#N Geom=AllCheck Guess=Read SCRF=Check MP4/6-31G(2df,p)
#N Geom=AllCheck Guess=Read SCRF=Check MP2=Full/GTLarge
```

---

```
Pointgroup= C1  Stoichiometry= C2HN2O(2)  C1[X(C2HN2O)]  #Atoms= 6
Charge = 0  Multiplicity = 2
```

---

```
SCF Energy= -259.974941195  Predicted Change= -6.994238D-07
MP2 Energy= -261.0561655643  Correl. Energy= -1.08122436
```

---

```
Optimization completed.      {Found      2      times}
Item  Max Val.  Criteria  Pass?  RMS Val.  Criteria  Pass?
Force  0.00031 || 0.00045  [ YES ]  0.00013 || 0.00030  [ YES ]
Displ  0.00133 || 0.00180  [ YES ]  0.00133 || 0.00180  [ YES ]
```

---

```
Atomic      Coordinates (Angstroms)
Type       X          Y          Z
```

---

```
C      1.080847   0.423133  -0.000018
C     -0.138586   1.159706   0.000264
H      2.106514   0.759071   0.000081
N     -1.167837   0.401097  -0.000317
O     -0.615949  -0.894613   0.000224
N      0.763195  -0.843841  -0.000161
```

---

## Statistical Thermodynamic Analysis

```
Temperature= 298.150 Kelvin  Pressure= 1.00000 Atm
```

---

```
SCF Energy=  -259.974941195  Predicted Change= -6.994238D-07
MP2 Energy=  -261.0561655643  MP2 Cor. Energy= -1.08122436
Zero-point correction (ZPE)=      -261.3148  0.03261
Internal Energy (U)=                -261.3113  0.03611
Enthalpy (H)=                       -261.3103  0.03705
Gibbs Free Energy (G)=               -261.3415  0.00588
```

---

```
Frequencies --  591.1112          637.7531          718.0781
```

Supporting Information: **2chloro134oxadiazole.out**

-----  
 Using Gaussian 03: IA32L-G03RevC.02 12-Jun-2004  
 =====

# g3b3

#N Geom=AllCheck Guess=Read SCRF=Check B3LYP/6-31G(d) Freq

#N Geom=AllCheck Guess=Read SCRF=Check QCISD(T,E4T)/6-31G(d)

#N Geom=AllCheck Guess=Read SCRF=Check MP4/6-31+G(d)

#N Geom=AllCheck Guess=Read SCRF=Check MP4/6-31G(2df,p)

#N Geom=AllCheck Guess=Read SCRF=Check MP2=Full/GTLarge  
 -----

Pointgroup= C1 Stoichiometry= C2HCIN2O C1[X(C2HCIN2O)] #Atoms= 7

Charge = 0 Multiplicity = 1  
 -----

SCF Energy= -719.619063486 Predicted Change= -6.089712D-07

MP2 Energy= -721.2628348498 Correl. Energy= -1.64377136  
 =====

Optimization completed. {Found 2 times}

| Item  | Max Val. | Criteria | Pass?   | RMS Val. | Criteria | Pass?   |
|-------|----------|----------|---------|----------|----------|---------|
| Force | 0.00031  | 0.00045  | [ YES ] | 0.00012  | 0.00030  | [ YES ] |
| Displ | 0.00164  | 0.00180  | [ YES ] | 0.00164  | 0.00180  | [ YES ] |

-----

| Atomic Type | Coordinates (Angstroms) |           |           |
|-------------|-------------------------|-----------|-----------|
|             | X                       | Y         | Z         |
| C           | -0.211887               | 0.095012  | -0.000033 |
| C           | 1.777614                | -0.582860 | 0.000119  |
| H           | 2.583853                | -1.300493 | 0.000194  |
| N           | 1.841079                | 0.705928  | 0.000100  |
| O           | 0.501438                | -1.061967 | 0.000075  |
| Cl          | -1.910338               | -0.020859 | -0.000120 |
| N           | 0.514068                | 1.162345  | 0.000004  |

-----

## Statistical Thermodynamic Analysis

Temperature= 298.150 Kelvin Pressure= 1.00000 Atm  
 =====

SCF Energy= -719.619063486 Predicted Change= -6.089712D-07

MP2 Energy= -721.2628348498 MP2 Cor. Energy= -1.64377136

Zero-point correction (ZPE)= -721.6443 0.03697

Internal Energy (U)= -721.6398 0.04141

Enthalpy (H)= -721.6389 0.04235

Gibbs Free Energy (G)= -721.6728 0.00847  
 -----

Frequencies -- 243.5394 326.5868 510.0765

Supporting Information: **2radical134oxadiazole.out**

Using Gaussian 03: IA32L-G03RevC.02 12-Jun-2004

# g3b3

#N Geom=AllCheck Guess=Read SCRF=Check B3LYP/6-31G(d) Freq

#N Geom=AllCheck Guess=Read SCRF=Check QCISD(T,E4T)/6-31G(d)

#N Geom=AllCheck Guess=Read SCRF=Check MP4/6-31+G(d)

#N Geom=AllCheck Guess=Read SCRF=Check MP4/6-31G(2df,p)

#N Geom=AllCheck Guess=Read SCRF=Check MP2=Full/GTLarge

Pointgroup= C1 Stoichiometry= C2HN2O(2) C1[X(C2HN2O)] #Atoms= 6

Charge = 0 Multiplicity = 2

SCF Energy= -260.035087742 Predicted Change= -8.383368D-07

MP2 Energy= -261.1303963516 Correl. Energy= -1.09530861

Optimization completed. {Found 2 times}

| Item  | Max Val. | Criteria | Pass?   | RMS Val. | Criteria | Pass?   |
|-------|----------|----------|---------|----------|----------|---------|
| Force | 0.00044  | 0.00045  | [ YES ] | 0.00017  | 0.00030  | [ YES ] |
| Displ | 0.00117  | 0.00180  | [ YES ] | 0.00117  | 0.00180  | [ YES ] |

| Atomic Type | Coordinates (Angstroms) |           |           |
|-------------|-------------------------|-----------|-----------|
|             | X                       | Y         | Z         |
| C           | -0.477923               | -1.013511 | -0.000103 |
| C           | 0.859976                | 0.584073  | -0.000002 |
| H           | 1.815295                | 1.087017  | 0.000105  |
| N           | -0.321748               | 1.105787  | 0.000121  |
| O           | 0.853087                | -0.785555 | 0.000064  |
| N           | -1.240011               | 0.004792  | -0.000119 |

## Statistical Thermodynamic Analysis

Temperature= 298.150 Kelvin Pressure= 1.00000 Atm

SCF Energy= -260.035087742 Predicted Change= -8.383368D-07

MP2 Energy= -261.1303963516 MP2 Cor. Energy= -1.09530861

Zero-point correction (ZPE)= -261.3588 0.03315

Internal Energy (U)= -261.3554 0.03661

Enthalpy (H)= -261.3544 0.03755

Gibbs Free Energy (G)= -261.3855 0.00647

Frequencies -- 574.9892 641.6295 833.1917



**Chlorofurans**Supporting Information: **23dichlorofuran.out**-----  
Using Gaussian 03: IA32L-G03RevC.02 12-Jun-2004  
=====

# g3b3

#N Geom=AllCheck Guess=Read SCRF=Check B3LYP/6-31G(d) Freq

#N Geom=AllCheck Guess=Read SCRF=Check QCISD(T,E4T)/6-31G(d)

#N Geom=AllCheck Guess=Read SCRF=Check MP4/6-31+G(d)

#N Geom=AllCheck Guess=Read SCRF=Check MP4/6-31G(2df,p)

#N Geom=AllCheck Guess=Read SCRF=Check MP2=Full/GTLarge  
-----

Pointgroup= C1 Stoichiometry= C4H2Cl2O C1[X(C4H2Cl2O)] #Atoms= 9

Charge = 0 Multiplicity = 1  
-----

SCF Energy= -1146.55067865 Predicted Change= -6.162684D-07

MP2 Energy= -1148.611160418 Correl. Energy= -2.06048176  
=====

Optimization completed. {Found 2 times}

Item Max Val. Criteria Pass? RMS Val. Criteria Pass?

Force 0.00042 || 0.00045 [ YES ] 0.00010 || 0.00030 [ YES ]

Displ 0.00141 || 0.00180 [ YES ] 0.00141 || 0.00180 [ YES ]  
-----

Atomic Coordinates (Angstroms)

Type X Y Z  
-----

C 0.649092 0.028450 -0.000073

C -0.697380 0.249301 0.000013

C -0.874664 1.671956 -0.000303

C 0.376980 2.199090 0.000290

H -1.815014 2.203330 -0.000463

H 0.764712 3.205584 0.000568

O 1.320659 1.207641 -0.000078

Cl 1.577097 -1.406114 -0.000008

Cl -1.944106 -0.944640 0.000065  
-----

Statistical Thermodynamic Analysis

Temperature= 298.150 Kelvin Pressure= 1.00000 Atm  
=====

SCF Energy= -1146.55067865 Predicted Change= -6.162684D-07

MP2 Energy= -1148.611160418 MP2 Cor. Energy= -2.06048176

Zero-point correction (ZPE)= -1149.1501 0.05145

Internal Energy (U)= -1149.1442 0.05736

Enthalpy (H)= -1149.1432 0.05830

Gibbs Free Energy (G)= -1149.1811 0.02040  
-----

Frequencies -- 166.9348 200.4054 254.4009

Supporting Information: **24dichlorofuran.out**

-----  
 Using Gaussian 03: IA32L-G03RevC.02 12-Jun-2004  
 =====

# g3b3  
 #N Geom=AllCheck Guess=Read SCRF=Check B3LYP/6-31G(d) Freq  
 #N Geom=AllCheck Guess=Read SCRF=Check QCISD(T,E4T)/6-31G(d)  
 #N Geom=AllCheck Guess=Read SCRF=Check MP4/6-31+G(d)  
 #N Geom=AllCheck Guess=Read SCRF=Check MP4/6-31G(2df,p)  
 #N Geom=AllCheck Guess=Read SCRF=Check MP2=Full/GTLarge

-----  
 Pointgroup= C1 Stoichiometry= C4H2Cl2O C1[X(C4H2Cl2O)] #Atoms= 9  
 Charge = 0 Multiplicity = 1  
 -----

SCF Energy= -1146.55165792 Predicted Change= -6.096069D-08  
 MP2 Energy= -1148.610881277 Correl. Energy= -2.05922335  
 =====

Optimization completed. {Found 2 times}  
 Item Max Val. Criteria Pass? RMS Val. Criteria Pass?  
 Force 0.00007 || 0.00045 [ YES ] 0.00002 || 0.00030 [ YES ]  
 Displ 0.00061 || 0.00180 [ YES ] 0.00061 || 0.00180 [ YES ]  
 -----

Atomic Coordinates (Angstroms)  
 Type X Y Z  
 -----

|    |           |           |           |
|----|-----------|-----------|-----------|
| C  | 0.631204  | 1.319496  | 0.000174  |
| C  | 1.125573  | 0.052123  | -0.000157 |
| C  | 0.012355  | -0.850998 | 0.000257  |
| C  | -1.080943 | -0.040951 | 0.000150  |
| H  | 1.078239  | 2.300039  | 0.000218  |
| H  | 0.034860  | -1.929805 | 0.000357  |
| O  | -0.737616 | 1.270488  | 0.000205  |
| Cl | 2.798390  | -0.396672 | -0.000524 |
| Cl | -2.759644 | -0.392278 | 0.000244  |

## Statistical Thermodynamic Analysis

Temperature= 298.150 Kelvin Pressure= 1.00000 Atm  
 =====

SCF Energy= -1146.55165792 Predicted Change= -6.096069D-08  
 MP2 Energy= -1148.610881277 MP2 Cor. Energy= -2.05922335  
 Zero-point correction (ZPE)= -1149.1512 0.05132  
 Internal Energy (U)= -1149.1453 0.05725  
 Enthalpy (H)= -1149.1444 0.05819  
 Gibbs Free Energy (G)= -1149.1823 0.02027  
 -----

Frequencies -- 145.9446 201.4909 308.4874

Supporting Information: **2chloro3radicalfuran.out**

Using Gaussian 03: IA32L-G03RevC.02 12-Jun-2004

#g3b3

#N Geom=AllCheck Guess=Read SCRF=Check B3LYP/6-31G(d) Freq

#N Geom=AllCheck Guess=Read SCRF=Check QCISD(T,E4T)/6-31G(d)

#N Geom=AllCheck Guess=Read SCRF=Check MP4/6-31+G(d)

#N Geom=AllCheck Guess=Read SCRF=Check MP4/6-31G(2df,p)

#N Geom=AllCheck Guess=Read SCRF=Check MP2=Full/GTLarge

Pointgroup= C1 Stoichiometry= C4H2ClO(2) C1[X(C4H2ClO)] #Atoms= 8

Charge = 0 Multiplicity = 2

SCF Energy= -686.969861376 Predicted Change= -4.911396D-08

MP2 Energy= -688.4713615115 Correl. Energy= -1.50150013

Optimization completed. {Found 2 times}

| Item  | Max Val. | Criteria | Pass?   | RMS Val. | Criteria | Pass?   |
|-------|----------|----------|---------|----------|----------|---------|
| Force | 0.00006  | 0.00045  | [ YES ] | 0.00002  | 0.00030  | [ YES ] |
| Displ | 0.00045  | 0.00180  | [ YES ] | 0.00045  | 0.00180  | [ YES ] |

| Atomic Type | Coordinates (Angstroms) |           |           |  |
|-------------|-------------------------|-----------|-----------|--|
|             | X                       | Y         | Z         |  |
| C           | -0.255939               | -0.146321 | 0.000030  |  |
| C           | 0.607079                | -1.185970 | -0.000005 |  |
| C           | 1.937486                | -0.679468 | -0.000015 |  |
| C           | 1.779364                | 0.675311  | 0.000037  |  |
| H           | 2.867145                | -1.229349 | -0.000031 |  |
| H           | 2.470287                | 1.504601  | 0.000057  |  |
| O           | 0.453122                | 1.023979  | -0.000042 |  |
| Cl          | -1.962962               | -0.026377 | 0.000002  |  |

## Statistical Thermodynamic Analysis

Temperature= 298.150 Kelvin Pressure= 1.00000 Atm

SCF Energy= -686.969861376 Predicted Change= -4.911396D-08

MP2 Energy= -688.4713615115 MP2 Cor. Energy= -1.50150013

Zero-point correction (ZPE)= -688.8630 0.04815

Internal Energy (U)= -688.8583 0.05290

Enthalpy (H)= -688.8574 0.05384

Gibbs Free Energy (G)= -688.8924 0.01882

Frequencies -- 208.4965 313.5255 494.5055

Supporting Information: **2chloro4radicalfuran.out**

-----  
 Using Gaussian 03: IA32L-G03RevC.02 12-Jun-2004  
 =====

#g3b3

#N Geom=AllCheck Guess=Read SCRF=Check B3LYP/6-31G(d) Freq  
 #N Geom=AllCheck Guess=Read SCRF=Check QCISD(T,E4T)/6-31G(d)  
 #N Geom=AllCheck Guess=Read SCRF=Check MP4/6-31+G(d)  
 #N Geom=AllCheck Guess=Read SCRF=Check MP4/6-31G(2df,p)  
 #N Geom=AllCheck Guess=Read SCRF=Check MP2=Full/GTLarge

-----  
 Pointgroup= C1 Stoichiometry= C4H2ClO(2) C1[X(C4H2ClO)] #Atoms= 8  
 Charge = 0 Multiplicity = 2  
 -----

SCF Energy= -686.971054267 Predicted Change= -1.161144D-06  
 MP2 Energy= -688.4739790099 Correl. Energy= -1.50292474  
 =====

Optimization completed. {Found 2 times}  
 Item Max Val. Criteria Pass? RMS Val. Criteria Pass?  
 Force 0.00038 || 0.00045 [ YES ] 0.00013 || 0.00030 [ YES ]  
 Displ 0.00155 || 0.00180 [ YES ] 0.00155 || 0.00180 [ YES ]  
 -----

Atomic Coordinates (Angstroms)  
 Type X Y Z  
 -----

|    |           |           |           |
|----|-----------|-----------|-----------|
| C  | 1.869702  | -0.640750 | 0.000176  |
| C  | 1.910928  | 0.707896  | -0.000216 |
| C  | 0.591811  | 1.241655  | 0.000162  |
| C  | -0.190579 | 0.122156  | -0.000062 |
| H  | 2.590671  | -1.440916 | 0.000181  |
| H  | 0.263623  | 2.269458  | 0.000197  |
| O  | 0.538654  | -1.022430 | 0.000215  |
| Cl | -1.897335 | -0.072638 | -0.000145 |

## Statistical Thermodynamic Analysis

Temperature= 298.150 Kelvin Pressure= 1.00000 Atm  
 =====

SCF Energy= -686.971054267 Predicted Change= -1.161144D-06  
 MP2 Energy= -688.4739790099 MP2 Cor. Energy= -1.50292474  
 Zero-point correction (ZPE)= -688.8651 0.04807  
 Internal Energy (U)= -688.8604 0.05282  
 Enthalpy (H)= -688.8594 0.05376  
 Gibbs Free Energy (G)= -688.8944 0.01876  
 -----

Frequencies -- 222.9401 315.0044 488.9690

Supporting Information: **2chlorofuran.out**

-----  
 Using Gaussian 03: IA32L-G03RevC.02 12-Jun-2004  
 =====

# g3b3  
 #N Geom=AllCheck Guess=Read SCRF=Check B3LYP/6-31G(d) Freq  
 #N Geom=AllCheck Guess=Read SCRF=Check QCISD(T,E4T)/6-31G(d)  
 #N Geom=AllCheck Guess=Read SCRF=Check MP4/6-31+G(d)  
 #N Geom=AllCheck Guess=Read SCRF=Check MP4/6-31G(2df,p)  
 #N Geom=AllCheck Guess=Read SCRF=Check MP2=Full/GTLarge

-----  
 Pointgroup= C1 Stoichiometry= C4H3ClO C1[X(C4H3ClO)] #Atoms= 9  
 Charge = 0 Multiplicity = 1  
 -----

SCF Energy= -687.627026432 Predicted Change= -8.296748D-08  
 MP2 Energy= -689.1966452151 Correl. Energy= -1.56961878  
 =====

Optimization completed. {Found 2 times}  
 Item Max Val. Criteria Pass? RMS Val. Criteria Pass?  
 Force 0.00008 || 0.00045 [ YES ] 0.00002 || 0.00030 [ YES ]  
 Displ 0.00065 || 0.00180 [ YES ] 0.00065 || 0.00180 [ YES ]  
 -----

Atomic Coordinates (Angstroms)  
 Type X Y Z  
 -----

|    |           |           |           |
|----|-----------|-----------|-----------|
| C  | -0.245110 | 0.103410  | 0.000031  |
| C  | 0.595975  | 1.173034  | -0.000260 |
| C  | 1.918080  | 0.613205  | 0.000225  |
| C  | 1.766282  | -0.737739 | 0.000015  |
| H  | 0.312792  | 2.215033  | -0.000420 |
| H  | 2.852926  | 1.156138  | 0.000467  |
| H  | 2.449007  | -1.572893 | 0.000069  |
| O  | 0.436357  | -1.068887 | -0.000182 |
| Cl | -1.959821 | -0.009332 | 0.000075  |

## Statistical Thermodynamic Analysis

Temperature= 298.150 Kelvin Pressure= 1.00000 Atm  
 =====

SCF Energy= -687.627026432 Predicted Change= -8.296748D-08  
 MP2 Energy= -689.1966452151 MP2 Cor. Energy= -1.56961878  
 Zero-point correction (ZPE)= -689.5512 0.06078  
 Internal Energy (U)= -689.5465 0.06554  
 Enthalpy (H)= -689.5455 0.06648  
 Gibbs Free Energy (G)= -689.5799 0.03207  
 -----

Frequencies -- 222.7153 313.0202 490.6118

Supporting Information: **2radicalfuran.out**


---

Using Gaussian 03: IA32L-G03RevC.02 12-Jun-2004

---

#g3b3

#N Geom=AllCheck Guess=Read SCRF=Check B3LYP/6-31G(d) Freq

#N Geom=AllCheck Guess=Read SCRF=Check QCISD(T,E4T)/6-31G(d)

#N Geom=AllCheck Guess=Read SCRF=Check MP4/6-31+G(d)

#N Geom=AllCheck Guess=Read SCRF=Check MP4/6-31G(2df,p)

#N Geom=AllCheck Guess=Read SCRF=Check MP2=Full/GTLarge

---

Pointgroup= C1 Stoichiometry= C4H3O(2) C1[X(C4H3O)] #Atoms= 8

Charge = 0 Multiplicity = 2

---

SCF Energy= -228.045359123 Predicted Change= -2.835661D-07

MP2 Energy= -229.060710079 Correl. Energy= -1.01535095

---

Optimization completed. {Found 2 times}

| Item  | Max Val. | Criteria | Pass?   | RMS Val. | Criteria | Pass?   |
|-------|----------|----------|---------|----------|----------|---------|
| Force | 0.00013  | 0.00045  | [ YES ] | 0.00004  | 0.00030  | [ YES ] |
| Displ | 0.00108  | 0.00180  | [ YES ] | 0.00108  | 0.00180  | [ YES ] |

---

| Atomic Type | Coordinates (Angstroms) |   |   |
|-------------|-------------------------|---|---|
|             | X                       | Y | Z |

---

|   |           |           |           |
|---|-----------|-----------|-----------|
| C | -0.209676 | -1.162281 | -0.000036 |
| C | -1.208803 | -0.243201 | 0.000284  |
| C | -0.506563 | 1.020116  | -0.000384 |
| C | 0.824181  | 0.740200  | 0.000413  |
| H | -2.273712 | -0.416412 | 0.000422  |
| H | -0.954882 | 2.004748  | -0.000699 |
| H | 1.725914  | 1.332073  | 0.000704  |
| O | 1.013481  | -0.631177 | -0.000261 |

---

## Statistical Thermodynamic Analysis

Temperature= 298.150 Kelvin Pressure= 1.00000 Atm

---

SCF Energy= -228.045359123 Predicted Change= -2.835661D-07

MP2 Energy= -229.060710079 MP2 Cor. Energy= -1.01535095

Zero-point correction (ZPE)= -229.2641 0.05714

Internal Energy (U)= -229.2603 0.06089

Enthalpy (H)= -229.2594 0.06184

Gibbs Free Energy (G)= -229.2909 0.03027

---

Frequencies -- 479.6383 605.9435 702.9918

Supporting Information: **3chloro2radicalfuran.out**

Using Gaussian 03: IA32L-G03RevC.02 12-Jun-2004

#g3b3

#N Geom=AllCheck Guess=Read SCRF=Check B3LYP/6-31G(d) Freq

#N Geom=AllCheck Guess=Read SCRF=Check QCISD(T,E4T)/6-31G(d)

#N Geom=AllCheck Guess=Read SCRF=Check MP4/6-31+G(d)

#N Geom=AllCheck Guess=Read SCRF=Check MP4/6-31G(2df,p)

#N Geom=AllCheck Guess=Read SCRF=Check MP2=Full/GTLarge

Pointgroup= C1 Stoichiometry= C4H2ClO(2) C1[X(C4H2ClO)] #Atoms= 8

Charge = 0 Multiplicity = 2

SCF Energy= -686.969414484 Predicted Change= -5.297178D-08

MP2 Energy= -688.4701978008 Correl. Energy= -1.50078331

Optimization completed. {Found 2 times}

| Item  | Max Val. | Criteria | Pass?   | RMS Val. | Criteria | Pass?   |
|-------|----------|----------|---------|----------|----------|---------|
| Force | 0.00006  | 0.00045  | [ YES ] | 0.00002  | 0.00030  | [ YES ] |
| Displ | 0.00027  | 0.00180  | [ YES ] | 0.00027  | 0.00180  | [ YES ] |

| Atomic Type | Coordinates (Angstroms) |           |           |  |
|-------------|-------------------------|-----------|-----------|--|
|             | X                       | Y         | Z         |  |
| C           | 0.546552                | -1.117171 | 0.000202  |  |
| C           | -0.283503               | -0.040872 | -0.000067 |  |
| C           | 0.597895                | 1.101225  | 0.000080  |  |
| C           | 1.864256                | 0.607502  | 0.000082  |  |
| H           | 0.297714                | 2.139663  | 0.000025  |  |
| H           | 2.847792                | 1.050166  | 0.000086  |  |
| O           | 1.833997                | -0.774979 | 0.000384  |  |
| Cl          | -2.009923               | -0.017300 | -0.000292 |  |

## Statistical Thermodynamic Analysis

Temperature= 298.150 Kelvin Pressure= 1.00000 Atm

SCF Energy= -686.969414484 Predicted Change= -5.297178D-08

MP2 Energy= -688.4701978008 MP2 Cor. Energy= -1.50078331

Zero-point correction (ZPE)= -688.8621 0.04790

Internal Energy (U)= -688.8573 0.05271

Enthalpy (H)= -688.8563 0.05365

Gibbs Free Energy (G)= -688.8915 0.01849

Frequencies -- 229.7544 298.2985 457.2052

Supporting Information: **3chlorofuran.out**

-----  
 Using Gaussian 03: IA32L-G03RevC.02 12-Jun-2004  
 =====

# g3b3  
 #N Geom=AllCheck Guess=Read SCRF=Check B3LYP/6-31G(d) Freq  
 #N Geom=AllCheck Guess=Read SCRF=Check QCISD(T,E4T)/6-31G(d)  
 #N Geom=AllCheck Guess=Read SCRF=Check MP4/6-31+G(d)  
 #N Geom=AllCheck Guess=Read SCRF=Check MP4/6-31G(2df,p)  
 #N Geom=AllCheck Guess=Read SCRF=Check MP2=Full/GTLarge

-----  
 Pointgroup= C1 Stoichiometry= C4H3ClO C1[X(C4H3ClO)] #Atoms= 9  
 Charge = 0 Multiplicity = 1  
 -----

SCF Energy= -687.626797921 Predicted Change= -1.352037D-07  
 MP2 Energy= -689.1954539019 Correl. Energy= -1.56865598  
 =====

Optimization completed. {Found 2 times}  
 Item Max Val. Criteria Pass? RMS Val. Criteria Pass?  
 Force 0.00006 || 0.00045 [ YES ] 0.00002 || 0.00030 [ YES ]  
 Displ 0.00128 || 0.00180 [ YES ] 0.00128 || 0.00180 [ YES ]  
 -----

Atomic Coordinates (Angstroms)  
 Type X Y Z  
 -----

|    |           |           |           |
|----|-----------|-----------|-----------|
| C  | 0.525881  | -1.098090 | 0.000361  |
| C  | -0.274422 | 0.003460  | -0.000058 |
| C  | 0.580454  | 1.153289  | 0.000489  |
| C  | 1.846168  | 0.655554  | -0.000370 |
| H  | 0.332664  | -2.158765 | 0.000558  |
| H  | 0.277931  | 2.190131  | 0.000840  |
| H  | 2.823557  | 1.113060  | -0.000733 |
| O  | 1.831382  | -0.707915 | -0.000117 |
| Cl | -2.009041 | 0.013742  | -0.000133 |

## Statistical Thermodynamic Analysis

Temperature= 298.150 Kelvin Pressure= 1.00000 Atm  
 =====

SCF Energy= -687.626797921 Predicted Change= -1.352037D-07  
 MP2 Energy= -689.1954539019 MP2 Cor. Energy= -1.56865598  
 Zero-point correction (ZPE)= -689.5512 0.06091  
 Internal Energy (U)= -689.5464 0.06567  
 Enthalpy (H)= -689.5455 0.06662  
 Gibbs Free Energy (G)= -689.5799 0.03217  
 -----

Frequencies -- 249.9133 294.0003 476.6580



Supporting Information: **3radicalfuran.out**


---

Using Gaussian 03: IA32L-G03RevC.02 12-Jun-2004

---

#g3b3

#N Geom=AllCheck Guess=Read SCRF=Check B3LYP/6-31G(d) Freq

#N Geom=AllCheck Guess=Read SCRF=Check QCISD(T,E4T)/6-31G(d)

#N Geom=AllCheck Guess=Read SCRF=Check MP4/6-31+G(d)

#N Geom=AllCheck Guess=Read SCRF=Check MP4/6-31G(2df,p)

#N Geom=AllCheck Guess=Read SCRF=Check MP2=Full/GTLarge

---

Pointgroup= C1 Stoichiometry= C4H3O(2) C1[X(C4H3O)] #Atoms= 8

Charge = 0 Multiplicity = 2

---

SCF Energy= -228.044928444 Predicted Change= -4.967048D-08

MP2 Energy= -229.0602240776 Correl. Energy= -1.01529563

---

Optimization completed. {Found 2 times}

| Item  | Max Val. | Criteria | Pass?   | RMS Val. | Criteria | Pass?   |
|-------|----------|----------|---------|----------|----------|---------|
| Force | 0.00006  | 0.00045  | [ YES ] | 0.00002  | 0.00030  | [ YES ] |
| Displ | 0.00031  | 0.00180  | [ YES ] | 0.00031  | 0.00180  | [ YES ] |

---

| Atomic Type | Coordinates (Angstroms) |   |   |
|-------------|-------------------------|---|---|
|             | X                       | Y | Z |

---

|   |           |           |           |
|---|-----------|-----------|-----------|
| C | 1.139341  | -0.352072 | 0.000078  |
| C | 0.108446  | -1.225981 | -0.000038 |
| C | -1.124428 | -0.513867 | -0.000013 |
| C | -0.743097 | 0.796785  | 0.000061  |
| H | 2.214167  | -0.427485 | 0.000072  |
| H | -2.132148 | -0.902626 | -0.000027 |
| H | -1.293363 | 1.726029  | 0.000102  |
| O | 0.616221  | 0.921861  | -0.000083 |

---

## Statistical Thermodynamic Analysis

Temperature= 298.150 Kelvin Pressure= 1.00000 Atm

---

SCF Energy= -228.044928444 Predicted Change= -4.967048D-08

MP2 Energy= -229.0602240776 MP2 Cor. Energy= -1.01529563

Zero-point correction (ZPE)= -229.2641 0.05752

Internal Energy (U)= -229.2604 0.06122

Enthalpy (H)= -229.2595 0.06216

Gibbs Free Energy (G)= -229.2910 0.03067

---

Frequencies -- 546.2086 616.7266 695.7238

Supporting Information: **4chloro2radicalfuran.out**

-----  
 Using Gaussian 03: IA32L-G03RevC.02 12-Jun-2004  
 =====

#g3b3

#N Geom=AllCheck Guess=Read SCRF=Check B3LYP/6-31G(d) Freq  
 #N Geom=AllCheck Guess=Read SCRF=Check QCISD(T,E4T)/6-31G(d)  
 #N Geom=AllCheck Guess=Read SCRF=Check MP4/6-31+G(d)  
 #N Geom=AllCheck Guess=Read SCRF=Check MP4/6-31G(2df,p)  
 #N Geom=AllCheck Guess=Read SCRF=Check MP2=Full/GTLarge

-----  
 Pointgroup= C1 Stoichiometry= C4H2ClO(2) C1[X(C4H2ClO)] #Atoms= 8  
 Charge = 0 Multiplicity = 2  
 -----

SCF Energy= -686.971055475 Predicted Change= -1.550099D-07  
 MP2 Energy= -688.473618643 Correl. Energy= -1.50256316  
 =====

Optimization completed. {Found 2 times}  
 Item Max Val. Criteria Pass? RMS Val. Criteria Pass?  
 Force 0.00009 || 0.00045 [ YES ] 0.00003 || 0.00030 [ YES ]  
 Displ 0.00085 || 0.00180 [ YES ] 0.00085 || 0.00180 [ YES ]  
 -----

Atomic Coordinates (Angstroms)  
 Type X Y Z  
 -----

|    |           |           |           |
|----|-----------|-----------|-----------|
| C  | -0.617923 | -1.059779 | 0.000348  |
| C  | 0.216959  | 0.015163  | 0.000001  |
| C  | -0.584519 | 1.215784  | 0.000236  |
| C  | -1.850027 | 0.727464  | -0.000434 |
| H  | -0.477987 | -2.128250 | 0.000620  |
| H  | -0.246801 | 2.239668  | 0.000431  |
| O  | -1.923289 | -0.602061 | -0.000602 |
| Cl | 1.948480  | -0.040395 | 0.000168  |

## Statistical Thermodynamic Analysis

Temperature= 298.150 Kelvin Pressure= 1.00000 Atm  
 =====

SCF Energy= -686.971055475 Predicted Change= -1.550099D-07  
 MP2 Energy= -688.473618643 MP2 Cor. Energy= -1.50256316  
 Zero-point correction (ZPE)= -688.8650 0.04787  
 Internal Energy (U)= -688.8602 0.05266  
 Enthalpy (H)= -688.8592 0.05360  
 Gibbs Free Energy (G)= -688.8943 0.01851  
 -----

Frequencies -- 247.7103 297.0466 475.5895

Supporting Information: **furan.out**

-----  
 Using Gaussian 03: IA32L-G03RevC.02 12-Jun-2004  
 =====

#g3b3

#N Geom=AllCheck Guess=Read SCRF=Check B3LYP/6-31G(d) Freq  
 #N Geom=AllCheck Guess=Read SCRF=Check QCISD(T,E4T)/6-31G(d)  
 #N Geom=AllCheck Guess=Read SCRF=Check MP4/6-31+G(d)  
 #N Geom=AllCheck Guess=Read SCRF=Check MP4/6-31G(2df,p)  
 #N Geom=AllCheck Guess=Read SCRF=Check MP2=Full/GTLarge

-----  
 Pointgroup= C1 Stoichiometry= C4H4O C1[X(C4H4O)] #Atoms= 9  
 Charge = 0 Multiplicity = 1  
 -----

SCF Energy= -228.701194033 Predicted Change= -2.709721D-07  
 MP2 Energy= -229.7807464229 Correl. Energy= -1.07955239  
 =====

Optimization completed. {Found 2 times}  
 Item Max Val. Criteria Pass? RMS Val. Criteria Pass?  
 Force 0.00018 || 0.00045 [ YES ] 0.00004 || 0.00030 [ YES ]  
 Displ 0.00113 || 0.00180 [ YES ] 0.00113 || 0.00180 [ YES ]  
 -----

| Atomic<br>Type | Coordinates (Angstroms) |   |   |
|----------------|-------------------------|---|---|
|                | X                       | Y | Z |

|   |           |           |           |
|---|-----------|-----------|-----------|
| C | 1.095472  | -0.346219 | 0.000294  |
| C | 0.716765  | 0.960688  | -0.000277 |
| C | -0.718925 | 0.959245  | 0.000312  |
| C | -1.094445 | -0.348566 | -0.000297 |
| H | 1.371434  | 1.821099  | -0.000490 |
| H | -1.375553 | 1.818176  | 0.000552  |
| H | -2.049141 | -0.852046 | -0.000518 |
| O | 0.001122  | -1.161278 | -0.000030 |
| H | 2.051087  | -0.847893 | 0.000505  |

## Statistical Thermodynamic Analysis

Temperature= 298.150 Kelvin Pressure= 1.00000 Atm  
 =====

SCF Energy= -228.701194033 Predicted Change= -2.709721D-07  
 MP2 Energy= -229.7807464229 MP2 Cor. Energy= -1.07955239  
 Zero-point correction (ZPE)= -229.9503 0.07019  
 Internal Energy (U)= -229.9466 0.07391  
 Enthalpy (H)= -229.9457 0.07485  
 Gibbs Free Energy (G)= -229.9766 0.04392  
 -----

Frequencies -- 613.8597 622.9856 722.3701

**Chloroimidazoles**

Supporting Information: 24dichloroimidazole.out

-----  
Using Gaussian 03: IA32L-G03RevC.02 12-Jun-2004  
=====

```
# g3b3 scf=maxcyc=1000
#N Geom=AllCheck Guess=Read SCRF=Check B3LYP/6-31G(d) Freq
#N Geom=AllCheck Guess=Read SCRF=Check QCISD(T,E4T)/6-31G(d)
#N Geom=AllCheck Guess=Read SCRF=Check MP4/6-31+G(d)
#N Geom=AllCheck Guess=Read SCRF=Check MP4/6-31G(2df,p)
#N Geom=AllCheck Guess=Read SCRF=Check MP2=Full/GTLarge
```

```
Pointgroup= C1 Stoichiometry= C3H2Cl2N2 C1[X(C3H2Cl2N2)] #Atoms= 9
Charge = 0 Multiplicity = 1
```

```
SCF Energy= -1142.74392049 Predicted Change= -5.543113D-07
MP2 Energy= -1144.816067934 Correl. Energy= -2.07214744
```

```
=====
Optimization completed. {Found 2 times}
Item Max Val. Criteria Pass? RMS Val. Criteria Pass?
Force 0.00025 || 0.00045 [ YES ] 0.00007 || 0.00030 [ YES ]
Displ 0.00096 || 0.00180 [ YES ] 0.00096 || 0.00180 [ YES ]
```

```
-----
Atomic Coordinates (Angstroms)
Type X Y Z
```

```
-----
C 1.029364 0.001781 0.000019
C -1.079545 0.083520 0.000012
C -0.677501 1.394487 0.000208
N 0.705293 1.324729 0.000019
H 1.354420 2.098827 0.000039
H -1.218805 2.326852 0.000341
N -0.017893 -0.781288 -0.000070
Cl 2.676570 -0.511257 -0.000056
Cl -2.710766 -0.495125 -0.000029
```

```
-----
Statistical Thermodynamic Analysis
```

```
Temperature= 298.150 Kelvin Pressure= 1.00000 Atm
```

```
=====
SCF Energy= -1142.74392049 Predicted Change= -5.543113D-07
MP2 Energy= -1144.816067934 MP2 Cor. Energy= -2.07214744
Zero-point correction (ZPE)= -1145.3476 0.05224
Internal Energy (U)= -1145.3417 0.05820
Enthalpy (H)= -1145.3407 0.05914
Gibbs Free Energy (G)= -1145.3786 0.02123
```

```
-----
Frequencies -- 162.2062 207.0136 295.3931
```

Supporting Information: **25dichloroimidazole.out**

-----  
 Using Gaussian 03: AM64L-G03RevC.02 12-Jun-2004  
 =====

```
#g3b3 scf=maxcyc=1000
#N Geom=AllCheck Guess=Read SCRF=Check B3LYP/6-31G(d) Freq
#N Geom=AllCheck Guess=Read SCRF=Check QCISD(T,E4T)/6-31G(d)
#N Geom=AllCheck Guess=Read SCRF=Check MP4/6-31+G(d)
#N Geom=AllCheck Guess=Read SCRF=Check MP4/6-31G(2df,p)
#N Geom=AllCheck Guess=Read SCRF=Check MP2=Full/GTLarge
```

-----  
 Pointgroup= C1 Stoichiometry= C3H2Cl2N2 C1[X(C3H2Cl2N2)] #Atoms= 9  
 Charge = 0 Multiplicity = 1  
 -----

```
SCF Energy= -1142.74143432 Predicted Change= -1.596270D-07
MP2 Energy= -1144.813390556 Correl. Energy= -2.07195623
=====
```

```
Optimization completed.      {Found      2      times}
Item  Max Val.  Criteria  Pass?  RMS Val.  Criteria  Pass?
Force  0.00008 || 0.00045 [ YES ]  0.00002 || 0.00030 [ YES ]
Displ  0.00130 || 0.00180 [ YES ]  0.00130 || 0.00180 [ YES ]
-----
```

```
Atomic      Coordinates (Angstroms)
Type       X          Y          Z
-----
```

```
C   -1.084565   0.160404  -0.000160
C    0.625267   1.436269   0.000399
C    1.104917   0.153833   0.000029
N   -0.002595  -0.673259   0.000647
H   -0.004844  -1.683588   0.001051
N   -0.755778   1.422216  -0.000097
Cl  -2.689236  -0.477170  -0.000381
H    1.185225   2.359882   0.000569
Cl    2.704207  -0.488832  -0.000035
-----
```

## Statistical Thermodynamic Analysis

Temperature= 298.150 Kelvin Pressure= 1.00000 Atm  
 =====

```
SCF Energy= -1142.74143432 Predicted Change= -1.596270D-07
MP2 Energy= -1144.813390556 MP2 Cor. Energy= -2.07195623
Zero-point correction (ZPE)= -1145.3451 0.05231
Internal Energy (U)= -1145.3391 0.05832
Enthalpy (H)= -1145.3382 0.05926
Gibbs Free Energy (G)= -1145.3762 0.02122
-----
```

```
Frequencies -- 154.8609          197.3673          286.1868
```

Supporting Information: **2chloro4radicalimidazole.out**

-----  
 Using Gaussian 03: IA32L-G03RevC.02 12-Jun-2004  
 =====

```
#g3b3 scf=maxcyc=1000
#N Geom=AllCheck Guess=Read SCRF=Check B3LYP/6-31G(d) Freq
#N Geom=AllCheck Guess=Read SCRF=Check QCISD(T,E4T)/6-31G(d)
#N Geom=AllCheck Guess=Read SCRF=Check MP4/6-31+G(d)
#N Geom=AllCheck Guess=Read SCRF=Check MP4/6-31G(2df,p)
#N Geom=AllCheck Guess=Read SCRF=Check MP2=Full/GTLarge
```

-----  
 Pointgroup= C1 Stoichiometry= C3H2ClN2(2) C1[X(C3H2ClN2)] #Atoms= 8  
 Charge = 0 Multiplicity = 2  
 -----

```
SCF Energy= -683.160077689 Predicted Change= -3.136227D-07
MP2 Energy= -684.6898367949 Correl. Energy= -1.5297591
=====
```

```
Optimization completed.      {Found 2 times}
Item  Max Val.  Criteria  Pass?  RMS Val.  Criteria  Pass?
Force  0.00009 || 0.00045 [ YES ]  0.00004 || 0.00030 [ YES ]
Displ  0.00137 || 0.00180 [ YES ]  0.00137 || 0.00180 [ YES ]
-----
```

```
Atomic      Coordinates (Angstroms)
Type        X          Y          Z
-----
```

```
C   -0.179101  -0.103128  -0.000191
C    1.787542  -0.823168   0.000096
C    1.937915   0.535921  -0.000586
N    0.622525   0.998429   0.000579
H    0.307864   1.959325   0.001026
H    2.787665   1.198694  -0.000915
N    0.508966  -1.223910   0.000305
Cl   -1.899653   0.044858  -0.000130
-----
```

## Statistical Thermodynamic Analysis

Temperature= 298.150 Kelvin Pressure= 1.00000 Atm  
 =====

```
SCF Energy= -683.160077689 Predicted Change= -3.136227D-07
MP2 Energy= -684.6898367949 MP2 Cor. Energy= -1.5297591
Zero-point correction (ZPE)= -685.0629 0.04913
Internal Energy (U)= -685.0582 0.05391
Enthalpy (H)= -685.0572 0.05485
Gibbs Free Energy (G)= -685.0922 0.01984
-----
```

```
Frequencies -- 233.9866          324.1607          492.4491
-----
```

Supporting Information: **2chloro5radicalimidazole.out**

Using Gaussian 03: AM64L-G03RevC.02 12-Jun-2004

#g3b3 scf=maxcyc=1000

#N Geom=AllCheck Guess=Read SCRF=Check B3LYP/6-31G(d) Freq

#N Geom=AllCheck Guess=Read SCRF=Check QCISD(T,E4T)/6-31G(d)

#N Geom=AllCheck Guess=Read SCRF=Check MP4/6-31+G(d)

#N Geom=AllCheck Guess=Read SCRF=Check MP4/6-31G(2df,p)

#N Geom=AllCheck Guess=Read SCRF=Check MP2=Full/GTLarge

Pointgroup= C1 Stoichiometry= C3H2ClN2(2) C1[X(C3H2ClN2)] #Atoms= 8

Charge = 0 Multiplicity = 2

SCF Energy= -683.156662158 Predicted Change= -3.087396D-07

MP2 Energy= -684.6844618854 Correl. Energy= -1.52779972

Optimization completed. {Found 2 times}

| Item  | Max Val. | Criteria | Pass?   | RMS Val. | Criteria | Pass?   |
|-------|----------|----------|---------|----------|----------|---------|
| Force | 0.00017  | 0.00045  | [ YES ] | 0.00006  | 0.00030  | [ YES ] |
| Displ | 0.00156  | 0.00180  | [ YES ] | 0.00156  | 0.00180  | [ YES ] |

| Atomic Type | Coordinates (Angstroms) |   |   |
|-------------|-------------------------|---|---|
|             | X                       | Y | Z |

|    |           |           |           |
|----|-----------|-----------|-----------|
| C  | 0.173743  | -0.053689 | 0.000039  |
| C  | -1.906803 | -0.618014 | 0.000033  |
| C  | -1.847821 | 0.744291  | 0.000155  |
| N  | -0.525083 | 1.120132  | 0.000019  |
| H  | -0.151191 | 2.057890  | 0.000049  |
| N  | -0.604723 | -1.103199 | -0.000195 |
| Cl | 1.900244  | -0.078412 | -0.000012 |
| H  | -2.759026 | -1.278948 | 0.000009  |

## Statistical Thermodynamic Analysis

Temperature= 298.150 Kelvin Pressure= 1.00000 Atm

SCF Energy= -683.156662158 Predicted Change= -3.087396D-07

MP2 Energy= -684.6844618854 MP2 Cor. Energy= -1.52779972

Zero-point correction (ZPE)= -685.0589 0.04897

Internal Energy (U)= -685.0541 0.05383

Enthalpy (H)= -685.0531 0.05477

Gibbs Free Energy (G)= -685.0883 0.01960

Frequencies -- 223.8572 320.1736 419.8859

Supporting Information: **2chloroimidazole.out**

-----  
 Using Gaussian 03: IA32L-G03RevC.02 12-Jun-2004  
 =====

```
# g3b3 scf=maxcyc=1000
#N Geom=AllCheck Guess=Read SCRF=Check B3LYP/6-31G(d) Freq
#N Geom=AllCheck Guess=Read SCRF=Check QCISD(T,E4T)/6-31G(d)
#N Geom=AllCheck Guess=Read SCRF=Check MP4/6-31+G(d)
#N Geom=AllCheck Guess=Read SCRF=Check MP4/6-31G(2df,p)
#N Geom=AllCheck Guess=Read SCRF=Check MP2=Full/GTLarge
```

-----  
 Pointgroup= C1 Stoichiometry= C3H3ClN2 C1[X(C3H3ClN2)] #Atoms= 9  
 Charge = 0 Multiplicity = 1  
 -----

```
SCF Energy= -683.817568197 Predicted Change= -2.335899D-07
MP2 Energy= -685.3994051953 Correl. Energy= -1.58183699
=====
```

```
Optimization completed.      {Found      2      times}
Item  Max Val.  Criteria  Pass?  RMS Val.  Criteria  Pass?
Force  0.00020 || 0.00045 [ YES ]  0.00005 || 0.00030 [ YES ]
Displ  0.00112 || 0.00180 [ YES ]  0.00112 || 0.00180 [ YES ]
-----
```

| Atomic<br>Type | Coordinates (Angstroms) |   |   |
|----------------|-------------------------|---|---|
|                | X                       | Y | Z |

|    |           |           |           |
|----|-----------|-----------|-----------|
| C  | 0.224293  | -0.087193 | -0.000032 |
| C  | -1.804522 | -0.717410 | 0.000072  |
| C  | -1.847508 | 0.652692  | 0.000126  |
| N  | -0.523480 | 1.054059  | 0.000125  |
| H  | -0.168646 | 1.999253  | 0.000264  |
| H  | -2.632900 | -1.412040 | 0.000077  |
| H  | -2.660483 | 1.362749  | 0.000194  |
| N  | -0.499749 | -1.172474 | -0.000033 |
| Cl | 1.952415  | -0.012329 | -0.000128 |

## Statistical Thermodynamic Analysis

Temperature= 298.150 Kelvin Pressure= 1.00000 Atm  
 =====

```
SCF Energy= -683.817568197 Predicted Change= -2.335899D-07
MP2 Energy= -685.3994051953 MP2 Cor. Energy= -1.58183699
Zero-point correction (ZPE)= -685.7456 0.06178
Internal Energy (U)= -685.7408 0.06660
Enthalpy (H)= -685.7398 0.06755
Gibbs Free Energy (G)= -685.7743 0.03307
-----
```

Frequencies -- 233.0408 320.1598 492.2728



Supporting Information: **2radicalimidazole.out**


---

Using Gaussian 03: IA32L-G03RevC.02 12-Jun-2004

---

```
#g3b3 scf=maxcyc=1000
#N Geom=AllCheck Guess=Read SCRF=Check B3LYP/6-31G(d) Freq
#N Geom=AllCheck Guess=Read SCRF=Check QCISD(T,E4T)/6-31G(d)
#N Geom=AllCheck Guess=Read SCRF=Check MP4/6-31+G(d)
#N Geom=AllCheck Guess=Read SCRF=Check MP4/6-31G(2df,p)
#N Geom=AllCheck Guess=Read SCRF=Check MP2=Full/GTLarge

Pointgroup= C1  Stoichiometry= C3H3N2(2)  C1[X(C3H3N2)]  #Atoms= 8
Charge = 0  Multiplicity = 2
```

---

SCF Energy= -224.233808279 Predicted Change= -6.251043D-07
MP2 Energy= -225.2768138881 Correl. Energy= -1.0430056

---

```
Optimization completed.      {Found      2      times}
Item  Max Val.  Criteria  Pass?  RMS Val.  Criteria  Pass?
Force  0.00036 || 0.00045 [ YES ]   0.00011 || 0.00030 [ YES ]
Displ  0.00079 || 0.00180 [ YES ]   0.00079 || 0.00180 [ YES ]
```

---

| Atomic Type | Coordinates (Angstroms) |   |   |
|-------------|-------------------------|---|---|
|             | X                       | Y | Z |

---

|   |           |           |           |
|---|-----------|-----------|-----------|
| C | -0.084240 | -1.164306 | -0.000079 |
| C | 0.852437  | 0.740002  | 0.000214  |
| C | -0.494517 | 0.992258  | -0.000235 |
| N | -1.101806 | -0.263463 | 0.000150  |
| H | -2.090428 | -0.462747 | 0.000217  |
| H | 1.672341  | 1.444593  | 0.000386  |
| H | -1.068042 | 1.907567  | -0.000394 |
| N | 1.079527  | -0.636128 | -0.000094 |

---

## Statistical Thermodynamic Analysis

Temperature= 298.150 Kelvin Pressure= 1.00000 Atm

---

```
SCF Energy= -224.233808279 Predicted Change= -6.251043D-07
MP2 Energy= -225.2768138881  MP2 Cor. Energy= -1.0430056
Zero-point correction (ZPE)= -225.4620 0.05827
Internal Energy (U)= -225.4582 0.06212
Enthalpy (H)= -225.4572 0.06306
Gibbs Free Energy (G)= -225.4889 0.03136
```

---

```
Frequencies -- 417.9161      582.3490      624.8687
```

Supporting Information: **45dichloroimidazole.out**

-----  
 Using Gaussian 03: IA32L-G03RevC.02 12-Jun-2004  
 =====

```
# g3b3 scf=maxcyc=1000
#N Geom=AllCheck Guess=Read SCRF=Check B3LYP/6-31G(d) Freq
#N Geom=AllCheck Guess=Read SCRF=Check QCISD(T,E4T)/6-31G(d)
#N Geom=AllCheck Guess=Read SCRF=Check MP4/6-31+G(d)
#N Geom=AllCheck Guess=Read SCRF=Check MP4/6-31G(2df,p)
#N Geom=AllCheck Guess=Read SCRF=Check MP2=Full/GTLarge
```

-----  
 Pointgroup= C1 Stoichiometry= C3H2Cl2N2 C1[X(C3H2Cl2N2)] #Atoms= 9  
 Charge = 0 Multiplicity = 1  
 -----

```
SCF Energy= -1142.74049372 Predicted Change= -4.811747D-07
MP2 Energy= -1144.814212099 Correl. Energy= -2.07371837
=====
```

```
Optimization completed.      {Found      2      times}
Item  Max Val.  Criteria  Pass?  RMS Val.  Criteria  Pass?
Force  0.00013 || 0.00045 [ YES ]  0.00003 || 0.00030 [ YES ]
Displ  0.00171 || 0.00180 [ YES ]  0.00171 || 0.00180 [ YES ]
-----
```

| Atomic Type | Coordinates (Angstroms) |           |           |  |
|-------------|-------------------------|-----------|-----------|--|
|             | X                       | Y         | Z         |  |
| C           | -0.126514               | 2.195950  | 0.000717  |  |
| C           | 0.700751                | 0.230938  | 0.000156  |  |
| C           | -0.663163               | 0.059488  | 0.000066  |  |
| N           | -1.186914               | 1.335750  | -0.000352 |  |
| H           | -2.171139               | 1.565459  | -0.000697 |  |
| N           | 1.024111                | 1.556623  | -0.000668 |  |
| Cl          | -1.657718               | -1.340313 | 0.000025  |  |
| H           | -0.249997               | 3.270046  | 0.001013  |  |
| Cl          | 1.898560                | -1.012650 | 0.000045  |  |

-----

## Statistical Thermodynamic Analysis

Temperature= 298.150 Kelvin Pressure= 1.00000 Atm  
 =====

```
SCF Energy= -1142.74049372 Predicted Change= -4.811747D-07
MP2 Energy= -1144.814212099 MP2 Cor. Energy= -2.07371837
Zero-point correction (ZPE)= -1145.3449 0.05247
Internal Energy (U)= -1145.3389 0.05843
Enthalpy (H)= -1145.3380 0.05938
Gibbs Free Energy (G)= -1145.3760 0.02140
-----
```

Frequencies -- 166.4685 202.2407 258.3255

Supporting Information: **4chloro2radicalimidazole.out**

-----  
 Using Gaussian 03: IA32L-G03RevC.02 12-Jun-2004  
 =====

```
#g3b3 scf=maxcyc=1000
#N Geom=AllCheck Guess=Read SCRF=Check B3LYP/6-31G(d) Freq
#N Geom=AllCheck Guess=Read SCRF=Check QCISD(T,E4T)/6-31G(d)
#N Geom=AllCheck Guess=Read SCRF=Check MP4/6-31+G(d)
#N Geom=AllCheck Guess=Read SCRF=Check MP4/6-31G(2df,p)
#N Geom=AllCheck Guess=Read SCRF=Check MP2=Full/GTLarge
```

-----  
 Pointgroup= C1 Stoichiometry= C3H2ClN2(2) C1[X(C3H2ClN2)] #Atoms= 8  
 Charge = 0 Multiplicity = 2  
 -----

```
SCF Energy= -683.160719916 Predicted Change= -1.203581D-07
MP2 Energy= -684.6919892497 Correl. Energy= -1.53126933
=====
```

```
Optimization completed.      {Found      2      times}
Item  Max Val.  Criteria  Pass?  RMS Val.  Criteria  Pass?
Force  0.00010 || 0.00045 [ YES ]  0.00003 || 0.00030 [ YES ]
Displ  0.00069 || 0.00180 [ YES ]  0.00069 || 0.00180 [ YES ]
-----
```

| Atomic Type | Coordinates (Angstroms) |   |   |
|-------------|-------------------------|---|---|
|             | X                       | Y | Z |

|    |           |           |           |
|----|-----------|-----------|-----------|
| C  | -1.715931 | -0.855519 | 0.000005  |
| C  | 0.210512  | -0.009965 | -0.000057 |
| C  | -0.645116 | 1.061342  | 0.000320  |
| N  | -1.915972 | 0.485548  | -0.000258 |
| H  | -2.800942 | 0.970363  | -0.000479 |
| H  | -0.479892 | 2.127427  | 0.000526  |
| N  | -0.482644 | -1.205713 | 0.000205  |
| Cl | 1.939668  | 0.045189  | -0.000076 |

## Statistical Thermodynamic Analysis

Temperature= 298.150 Kelvin Pressure= 1.00000 Atm  
 =====

```
SCF Energy= -683.160719916 Predicted Change= -1.203581D-07
MP2 Energy= -684.6919892497 MP2 Cor. Energy= -1.53126933
Zero-point correction (ZPE)= -685.0644 0.04891
Internal Energy (U)= -685.0596 0.05377
Enthalpy (H)= -685.0586 0.05471
Gibbs Free Energy (G)= -685.0938 0.01955
-----
```

Frequencies -- 249.1540 320.3538 415.2651

Supporting Information: **4chloro5radicalimidazole.out**

-----  
 Using Gaussian 03: IA32L-G03RevC.02 12-Jun-2004  
 =====

```
#g3b3 scf=maxcyc=1000
#N Geom=AllCheck Guess=Read SCRF=Check B3LYP/6-31G(d) Freq
#N Geom=AllCheck Guess=Read SCRF=Check QCISD(T,E4T)/6-31G(d)
#N Geom=AllCheck Guess=Read SCRF=Check MP4/6-31+G(d)
#N Geom=AllCheck Guess=Read SCRF=Check MP4/6-31G(2df,p)
#N Geom=AllCheck Guess=Read SCRF=Check MP2=Full/GTLarge
```

-----  
 Pointgroup= C1 Stoichiometry= C3H2ClN2(2) C1[X(C3H2ClN2)] #Atoms= 8  
 Charge = 0 Multiplicity = 2  
 -----

```
SCF Energy= -683.155465742 Predicted Change= -7.649637D-07
MP2 Energy= -684.6811155955 Correl. Energy= -1.52564985
=====
```

```
Optimization completed.      {Found      2      times}
Item  Max Val.  Criteria  Pass?  RMS Val.  Criteria  Pass?
Force  0.00044 || 0.00045 [ YES ]  0.00011 || 0.00030 [ YES ]
Displ  0.00169 || 0.00180 [ YES ]  0.00169 || 0.00180 [ YES ]
-----
```

```
Atomic      Coordinates (Angstroms)
Type        X          Y          Z
-----
```

```
  C    -1.746120   0.708407   0.000586
  C     0.268432  -0.050590   0.000162
  C    -0.565572  -1.131927   0.000030
  N    -1.851335  -0.654226  -0.000287
  H    -2.694849  -1.209634  -0.000579
  N    -0.484222   1.095169  -0.000275
  H    -2.601788   1.369353   0.000843
  Cl    1.994417  -0.023627  -0.000058
-----
```

## Statistical Thermodynamic Analysis

Temperature= 298.150 Kelvin Pressure= 1.00000 Atm  
 =====

```
SCF Energy= -683.155465742 Predicted Change= -7.649637D-07
MP2 Energy= -684.6811155955 MP2 Cor. Energy= -1.52564985
Zero-point correction (ZPE)= -685.0575 0.04897
Internal Energy (U)= -685.0526 0.05384
Enthalpy (H)= -685.0516 0.05479
Gibbs Free Energy (G)= -685.0869 0.01957
-----
```

```
Frequencies -- 220.7571          322.1891          401.4022
```

Supporting Information: **4chloroimidazole.out**

-----  
 Using Gaussian 03: IA32L-G03RevC.02 12-Jun-2004  
 =====

```
# g3b3 scf=maxcyc=1000
#N Geom=AllCheck Guess=Read SCRF=Check B3LYP/6-31G(d) Freq
#N Geom=AllCheck Guess=Read SCRF=Check QCISD(T,E4T)/6-31G(d)
#N Geom=AllCheck Guess=Read SCRF=Check MP4/6-31+G(d)
#N Geom=AllCheck Guess=Read SCRF=Check MP4/6-31G(2df,p)
#N Geom=AllCheck Guess=Read SCRF=Check MP2=Full/GTLarge
```

-----  
 Pointgroup= C1 Stoichiometry= C3H3ClN2 C1[X(C3H3ClN2)] #Atoms= 9  
 Charge = 0 Multiplicity = 1  
 -----

```
SCF Energy= -683.817657537 Predicted Change= -2.269306D-07
MP2 Energy= -685.4000968233 Correl. Energy= -1.58243928
=====
```

```
Optimization completed.      {Found      2      times}
Item  Max Val.  Criteria  Pass?  RMS Val.  Criteria  Pass?
Force  0.00020 || 0.00045 [ YES ]  0.00005 || 0.00030 [ YES ]
Displ  0.00130 || 0.00180 [ YES ]  0.00130 || 0.00180 [ YES ]
-----
```

| Atomic<br>Type | Coordinates (Angstroms) |   |   |
|----------------|-------------------------|---|---|
|                | X                       | Y | Z |

|    |           |           |           |
|----|-----------|-----------|-----------|
| C  | 1.724542  | -0.763293 | -0.000088 |
| C  | -0.254940 | 0.002756  | 0.000017  |
| C  | 0.551919  | 1.113817  | 0.000047  |
| N  | 1.832209  | 0.597351  | 0.000065  |
| H  | 2.688278  | 1.133290  | 0.000206  |
| H  | 2.586438  | -1.416390 | -0.000155 |
| H  | 0.339688  | 2.170853  | 0.000102  |
| N  | 0.466791  | -1.155053 | -0.000125 |
| Cl | -1.990384 | -0.006089 | 0.000024  |

## Statistical Thermodynamic Analysis

Temperature= 298.150 Kelvin Pressure= 1.00000 Atm  
 =====

```
SCF Energy= -683.817657537 Predicted Change= -2.269306D-07
MP2 Energy= -685.4000968233 MP2 Cor. Energy= -1.58243928
Zero-point correction (ZPE)= -685.7467 0.06186
Internal Energy (U)= -685.7419 0.06666
Enthalpy (H)= -685.7409 0.06761
Gibbs Free Energy (G)= -685.7754 0.03316
-----
```

```
Frequencies -- 249.3283          317.1711          483.8617
```

Supporting Information: **4radicalimidazole.out**

-----  
 Using Gaussian 03: IA32L-G03RevC.02 12-Jun-2004  
 =====

#g3b3 scf=maxcyc=1000  
 #N Geom=AllCheck Guess=Read SCRF=Check B3LYP/6-31G(d) Freq  
 #N Geom=AllCheck Guess=Read SCRF=Check QCISD(T,E4T)/6-31G(d)  
 #N Geom=AllCheck Guess=Read SCRF=Check MP4/6-31+G(d)  
 #N Geom=AllCheck Guess=Read SCRF=Check MP4/6-31G(2df,p)  
 #N Geom=AllCheck Guess=Read SCRF=Check MP2=Full/GTLarge

-----  
 Pointgroup= C1 Stoichiometry= C3H3N2(2) C1[X(C3H3N2)] #Atoms= 8  
 Charge = 0 Multiplicity = 2  
 -----

SCF Energy= -224.233079166 Predicted Change= -4.626796D-07  
 MP2 Energy= -225.274162051 Correl. Energy= -1.04108288  
 =====

Optimization completed. {Found 2 times}  
 Item Max Val. Criteria Pass? RMS Val. Criteria Pass?  
 Force 0.00026 || 0.00045 [ YES ] 0.00009 || 0.00030 [ YES ]  
 Displ 0.00136 || 0.00180 [ YES ] 0.00136 || 0.00180 [ YES ]  
 -----

Atomic Coordinates (Angstroms)  
 Type X Y Z  
 -----

|   |           |           |           |
|---|-----------|-----------|-----------|
| C | 0.821094  | 0.703313  | 0.000175  |
| C | -0.077738 | -1.206713 | -0.000215 |
| C | -1.139620 | -0.341794 | 0.000322  |
| N | -0.528402 | 0.907863  | -0.000091 |
| H | -0.995774 | 1.804319  | -0.000113 |
| H | 1.536434  | 1.514591  | 0.000258  |
| H | -2.209865 | -0.469140 | 0.000520  |
| N | 1.106515  | -0.590521 | -0.000246 |

## Statistical Thermodynamic Analysis

Temperature= 298.150 Kelvin Pressure= 1.00000 Atm  
 =====

SCF Energy= -224.233079166 Predicted Change= -4.626796D-07  
 MP2 Energy= -225.274162051 MP2 Cor. Energy= -1.04108288  
 Zero-point correction (ZPE)= -225.4614 0.05857  
 Internal Energy (U)= -225.4577 0.06231  
 Enthalpy (H)= -225.4567 0.06325  
 Gibbs Free Energy (G)= -225.4883 0.03174  
 -----

Frequencies -- 524.5465 599.9321 671.5358

Supporting Information: **5chloro2radicalimidazole.out**

-----  
 Using Gaussian 03: AM64L-G03RevC.02 12-Jun-2004  
 =====

```
#g3b3 scf=maxcyc=1000
#N Geom=AllCheck Guess=Read SCRF=Check B3LYP/6-31G(d) Freq
#N Geom=AllCheck Guess=Read SCRF=Check QCISD(T,E4T)/6-31G(d)
#N Geom=AllCheck Guess=Read SCRF=Check MP4/6-31+G(d)
#N Geom=AllCheck Guess=Read SCRF=Check MP4/6-31G(2df,p)
#N Geom=AllCheck Guess=Read SCRF=Check MP2=Full/GTLarge
```

-----  
 Pointgroup= C1 Stoichiometry= C3H2ClN2(2) C1[X(C3H2ClN2)] #Atoms= 8  
 Charge = 0 Multiplicity = 2  
 -----

```
SCF Energy= -683.158503497 Predicted Change= -2.879330D-07
MP2 Energy= -684.6898172134 Correl. Energy= -1.53131371
=====
```

```
Optimization completed.      {Found      2      times}
Item  Max Val.  Criteria  Pass?  RMS Val.  Criteria  Pass?
Force  0.00009 || 0.00045 [ YES ]  0.00003 || 0.00030 [ YES ]
Displ  0.00131 || 0.00180 [ YES ]  0.00131 || 0.00180 [ YES ]
-----
```

| Atomic<br>Type | Coordinates (Angstroms) |   |   |
|----------------|-------------------------|---|---|
|                | X                       | Y | Z |

|    |           |           |           |
|----|-----------|-----------|-----------|
| C  | 1.849585  | 0.693508  | -0.000501 |
| C  | 0.701560  | -1.104298 | 0.000500  |
| C  | -0.196189 | -0.070552 | -0.000073 |
| N  | 0.552931  | 1.103887  | 0.000555  |
| H  | 0.194378  | 2.047292  | 0.000969  |
| N  | 1.990823  | -0.575500 | -0.000678 |
| H  | 0.511045  | -2.167273 | 0.000843  |
| Cl | -1.920084 | -0.040628 | -0.000030 |

## Statistical Thermodynamic Analysis

Temperature= 298.150 Kelvin Pressure= 1.00000 Atm  
 =====

```
SCF Energy= -683.158503497 Predicted Change= -2.879330D-07
MP2 Energy= -684.6898172134 MP2 Cor. Energy= -1.53131371
Zero-point correction (ZPE)= -685.0629 0.04895
Internal Energy (U)= -685.0580 0.05386
Enthalpy (H)= -685.0571 0.05481
Gibbs Free Energy (G)= -685.0924 0.01952
-----
```

Frequencies -- 230.5840 300.7706 400.6941

Supporting Information: **Schlolo4radicalimidazole.out**


---

Using Gaussian 03: IA32L-G03RevC.02 12-Jun-2004

---

```
#g3b3 scf=maxcyc=1000
#N Geom=AllCheck Guess=Read SCRF=Check B3LYP/6-31G(d) Freq
#N Geom=AllCheck Guess=Read SCRF=Check QCISD(T,E4T)/6-31G(d)
#N Geom=AllCheck Guess=Read SCRF=Check MP4/6-31+G(d)
#N Geom=AllCheck Guess=Read SCRF=Check MP4/6-31G(2df,p)
#N Geom=AllCheck Guess=Read SCRF=Check MP2=Full/GTLarge

Pointgroup= C1  Stoichiometry= C3H2ClN2(2)  C1[X(C3H2ClN2)]  #Atoms= 8
Charge = 0  Multiplicity = 2
```

---

SCF Energy= -683.156484261 Predicted Change= -1.802430D-07
MP2 Energy= -684.6842148375 Correl. Energy= -1.52773057

---

```
Optimization completed.      {Found      2      times}
Item  Max Val.  Criteria  Pass?  RMS Val.  Criteria  Pass?
Force  0.00017 || 0.00045 [ YES ]   0.00005 || 0.00030 [ YES ]
Displ  0.00111 || 0.00180 [ YES ]   0.00111 || 0.00180 [ YES ]
```

---

| Atomic Type | Coordinates (Angstroms) |   |   |
|-------------|-------------------------|---|---|
|             | X                       | Y | Z |

---

|    |           |           |           |
|----|-----------|-----------|-----------|
| C  | 1.850149  | 0.555233  | 0.000247  |
| C  | 0.627200  | -1.176297 | -0.000151 |
| C  | -0.251592 | -0.128996 | 0.000014  |
| N  | 0.558267  | 0.999028  | 0.000015  |
| H  | 0.238596  | 1.958708  | -0.000075 |
| N  | 1.895843  | -0.768345 | 0.000410  |
| Cl | -1.968876 | -0.017541 | -0.000235 |
| H  | 2.698982  | 1.225068  | 0.000425  |

---

## Statistical Thermodynamic Analysis

Temperature= 298.150 Kelvin Pressure= 1.00000 Atm

---

```
SCF Energy= -683.156484261 Predicted Change= -1.802430D-07
MP2 Energy= -684.6842148375  MP2 Cor. Energy= -1.52773057
Zero-point correction (ZPE)= -685.0600 0.04931
Internal Energy (U)= -685.0552 0.05410
Enthalpy (H)= -685.0542 0.05504
Gibbs Free Energy (G)= -685.0893 0.01996
```

---

```
Frequencies -- 223.6661      305.4350      488.6244
```



Supporting Information: **Schlroimidazole.out**

-----  
 Using Gaussian 03: IA32L-G03RevC.02 12-Jun-2004  
 =====

```
# g3b3 scf=maxcyc=1000
#N Geom=AllCheck Guess=Read SCRF=Check B3LYP/6-31G(d) Freq
#N Geom=AllCheck Guess=Read SCRF=Check QCISD(T,E4T)/6-31G(d)
#N Geom=AllCheck Guess=Read SCRF=Check MP4/6-31+G(d)
#N Geom=AllCheck Guess=Read SCRF=Check MP4/6-31G(2df,p)
#N Geom=AllCheck Guess=Read SCRF=Check MP2=Full/GTLarge
```

-----  
 Pointgroup= C1 Stoichiometry= C3H3ClN2 C1[X(C3H3ClN2)] #Atoms= 9  
 Charge = 0 Multiplicity = 1  
 -----

```
SCF Energy= -683.814814461 Predicted Change= -2.358405D-07
MP2 Energy= -685.3970854529 Correl. Energy= -1.58227099
=====
```

```
Optimization completed.      {Found      1      times}
Item  Max Val.  Criteria  Pass?  RMS Val.  Criteria  Pass?
Force  0.00020 || 0.00045 [ YES ]  0.00005 || 0.00030 [ YES ]
Displ  0.00199 || 0.00180 [ NO ]   0.00199 || 0.00180 [ YES ]
-----
```

| Atomic Type | Coordinates (Angstroms) |   |   |
|-------------|-------------------------|---|---|
|             | X                       | Y | Z |

|    |           |           |           |
|----|-----------|-----------|-----------|
| C  | 1.833526  | -0.616490 | 0.000184  |
| C  | 0.613868  | 1.150877  | 0.000077  |
| C  | -0.249931 | 0.086255  | -0.000017 |
| N  | 0.534302  | -1.046853 | -0.000006 |
| H  | 0.196879  | -1.998962 | -0.000150 |
| H  | 2.668082  | -1.304663 | 0.000272  |
| H  | 0.371364  | 2.203846  | 0.000093  |
| N  | 1.913556  | 0.695607  | 0.000094  |
| Cl | -1.973889 | -0.009726 | -0.000135 |

## Statistical Thermodynamic Analysis

Temperature= 298.150 Kelvin Pressure= 1.00000 Atm  
 =====

```
SCF Energy= -683.814814461 Predicted Change= -2.358405D-07
MP2 Energy= -685.3970854529 MP2 Cor. Energy= -1.58227099
Zero-point correction (ZPE)= -685.7437 0.06190
Internal Energy (U)= -685.7388 0.06675
Enthalpy (H)= -685.7379 0.06769
Gibbs Free Energy (G)= -685.7725 0.03312
-----
```

Frequencies -- 227.7798            297.5444            485.5304

Supporting Information: **Sradicalimidazole.out**


---

Using Gaussian 03: IA32L-G03RevC.02 12-Jun-2004

---

```
#g3b3 scf=maxcyc=1000
#N Geom=AllCheck Guess=Read SCRF=Check B3LYP/6-31G(d) Freq
#N Geom=AllCheck Guess=Read SCRF=Check QCISD(T,E4T)/6-31G(d)
#N Geom=AllCheck Guess=Read SCRF=Check MP4/6-31+G(d)
#N Geom=AllCheck Guess=Read SCRF=Check MP4/6-31G(2df,p)
#N Geom=AllCheck Guess=Read SCRF=Check MP2=Full/GTLarge
```

---

Pointgroup= C1 Stoichiometry= C3H3N2(2) C1[X(C3H3N2)] #Atoms= 8
Charge = 0 Multiplicity = 2

---

```
SCF Energy= -224.229325133 Predicted Change= -2.486471D-07
MP2 Energy= -225.2679354011 Correl. Energy= -1.03861026
```

---

```
Optimization completed.      {Found      2      times}
Item  Max Val.  Criteria  Pass?  RMS Val.  Criteria  Pass?
Force  0.00012 || 0.00045 [ YES ]   0.00004 || 0.00030 [ YES ]
Displ  0.00117 || 0.00180 [ YES ]   0.00117 || 0.00180 [ YES ]
```

---

```
Atomic      Coordinates (Angstroms)
Type        X          Y          Z
```

---

```
C      0.707613   0.812363   0.000376
C     -1.188652  -0.244499   0.000144
C     -0.192624  -1.179134   0.000186
N      1.012081  -0.521578  -0.000191
H      1.927316  -0.947164  -0.000368
H      1.460354   1.589235   0.000492
H     -2.259753  -0.373845   0.000128
N     -0.595787   1.007206  -0.000451
```

---

## Statistical Thermodynamic Analysis

```
Temperature= 298.150 Kelvin   Pressure= 1.00000 Atm
```

---

```
SCF Energy= -224.229325133 Predicted Change= -2.486471D-07
MP2 Energy= -225.2679354011 MP2 Cor. Energy= -1.03861026
Zero-point correction (ZPE)= -225.4568 0.05844
Internal Energy (U)= -225.4530 0.06223
Enthalpy (H)= -225.4520 0.06318
Gibbs Free Energy (G)= -225.4837 0.03155
```

---

```
Frequencies -- 434.4923          556.2799          679.1738
```

**Chloroisothiazoles**Supporting Information: **35dichloroisothiazole2.out**-----  
Using Gaussian 03: IA32L-G03RevC.02 12-Jun-2004  
=====

# g3b3

#N Geom=AllCheck Guess=Read SCRF=Check B3LYP/6-31G(d) Freq

#N Geom=AllCheck Guess=Read SCRF=Check QCISD(T,E4T)/6-31G(d)

#N Geom=AllCheck Guess=Read SCRF=Check MP4/6-31+G(d)

#N Geom=AllCheck Guess=Read SCRF=Check MP4/6-31G(2df,p)

#N Geom=AllCheck Guess=Read SCRF=Check MP2=Full/GTLarge  
-----

Pointgroup= C1 Stoichiometry= C3HCl2NS C1[X(C3HCl2NS)] #Atoms= 8

Charge = 0 Multiplicity = 1  
-----

SCF Energy= -1485.22260890 Predicted Change= -4.151368D-07

MP2 Energy= -1487.52238441 Correl. Energy= -2.29977551  
=====

Optimization completed. {Found 2 times}

Item Max Val. Criteria Pass? RMS Val. Criteria Pass?

Force 0.00026 || 0.00045 [ YES ] 0.00008 || 0.00030 [ YES ]

Displ 0.00101 || 0.00180 [ YES ] 0.00101 || 0.00180 [ YES ]  
-----

Atomic Coordinates (Angstroms)

Type X Y Z  
-----

C 1.198684 -0.026305 0.000159

C 0.094551 -0.930741 0.000184

C -1.062785 -0.202817 -0.000023

S -0.699247 1.495648 0.000344

H 0.168040 -2.009349 0.000199

N 0.964296 1.259814 -0.000242

Cl 2.847459 -0.592852 -0.000166

Cl -2.677627 -0.806003 -0.000183  
-----

Statistical Thermodynamic Analysis

Temperature= 298.150 Kelvin Pressure= 1.00000 Atm  
=====

SCF Energy= -1485.22260890 Predicted Change= -4.151368D-07

MP2 Energy= -1487.52238441 MP2 Cor. Energy= -2.29977551

Zero-point correction (ZPE)= -1488.1875 0.03632

Internal Energy (U)= -1488.1813 0.04251

Enthalpy (H)= -1488.1803 0.04345

Gibbs Free Energy (G)= -1488.2192 0.00456  
-----

Frequencies -- 156.8885 189.2989 275.2450

Supporting Information: **3chloro5radicalisothiazole.out**

Using Gaussian 03: IA32L-G03RevC.02 12-Jun-2004

```
=====
# g3b3 scf=maxcyc=1000
#N Geom=AllCheck Guess=Read SCRF=Check B3LYP/6-31G(d) Freq
#N Geom=AllCheck Guess=Read SCRF=Check QCISD(T,E4T)/6-31G(d)
#N Geom=AllCheck Guess=Read SCRF=Check MP4/6-31+G(d)
#N Geom=AllCheck Guess=Read SCRF=Check MP4/6-31G(2df,p)
#N Geom=AllCheck Guess=Read SCRF=Check MP2=Full/GTLarge

Pointgroup= C1  Stoichiometry= C3HCINS(2)  C1[X(C3HCINS)]  #Atoms= 7
Charge = 0  Multiplicity = 2
=====
```

```
SCF Energy= -1025.64698251  Predicted Change= -4.672559D-07
MP2 Energy= -1027.38636207  Correl. Energy= -1.73937956
=====
```

```
Optimization completed.      {Found      2      times}
Item  Max Val.  Criteria  Pass?  RMS Val.  Criteria  Pass?
Force  0.00018 || 0.00045 [ YES ]   0.00007 || 0.00030 [ YES ]
Displ  0.00095 || 0.00180 [ YES ]   0.00095 || 0.00180 [ YES ]
=====
```

```
Atomic      Coordinates (Angstroms)
Type       X          Y          Z
=====
```

```
  C      -0.501128    0.053891   -0.000283
  C       0.092050    1.357585   -0.000025
  C       1.437482    1.164080    0.000747
  S       1.888842   -0.479339   -0.000326
  H      -0.444117    2.296327    0.000173
  N       0.274190   -1.003625    0.000482
  Cl      -2.227477   -0.179698   -0.000057
=====
```

## Statistical Thermodynamic Analysis

```
Temperature= 298.150 Kelvin  Pressure= 1.00000 Atm
=====
```

```
SCF Energy=  -1025.64698251 Predicted Change= -4.672559D-07
MP2 Energy=  -1027.38636207 MP2 Cor. Energy= -1.73937956
Zero-point correction (ZPE)=    -1027.9072  0.03320
Internal Energy (U)=              -1027.9022  0.03816
Enthalpy (H)=                    -1027.9013  0.03911
Gibbs Free Energy (G)=            -1027.9372  0.00313
=====
```

```
Frequencies --  223.9805          301.0024          427.8377
=====
```

Supporting Information: **3chloroisothiazole.out**


---

Using Gaussian 03: IA32L-G03RevC.02 12-Jun-2004

---

# g3b3

#N Geom=AllCheck Guess=Read SCRF=Check B3LYP/6-31G(d) Freq

#N Geom=AllCheck Guess=Read SCRF=Check QCISD(T,E4T)/6-31G(d)

#N Geom=AllCheck Guess=Read SCRF=Check MP4/6-31+G(d)

#N Geom=AllCheck Guess=Read SCRF=Check MP4/6-31G(2df,p)

#N Geom=AllCheck Guess=Read SCRF=Check MP2=Full/GTLarge

---

Pointgroup= C1 Stoichiometry= C3H2CINS C1[X(C3H2CINS)] #Atoms= 8

Charge = 0 Multiplicity = 1

---

SCF Energy= -1026.30057239 Predicted Change= -9.211125D-08

MP2 Energy= -1028.10858143 Correl. Energy= -1.80800904

---

Optimization completed. {Found 2 times}

| Item  | Max Val. | Criteria | Pass?   | RMS Val. | Criteria | Pass?   |
|-------|----------|----------|---------|----------|----------|---------|
| Force | 0.00009  | 0.00045  | [ YES ] | 0.00003  | 0.00030  | [ YES ] |
| Displ | 0.00067  | 0.00180  | [ YES ] | 0.00067  | 0.00180  | [ YES ] |

---

| Atomic Type | Coordinates (Angstroms) |   |   |
|-------------|-------------------------|---|---|
|             | X                       | Y | Z |

---

|    |           |           |           |
|----|-----------|-----------|-----------|
| C  | -0.533395 | 0.028120  | -0.000137 |
| C  | 0.120646  | 1.298513  | 0.000044  |
| C  | 1.473385  | 1.107517  | 0.000033  |
| S  | 1.813375  | -0.584866 | -0.000053 |
| H  | -0.390058 | 2.252377  | 0.000076  |
| H  | 2.255982  | 1.855667  | 0.000057  |
| N  | 0.200011  | -1.053874 | 0.000179  |
| Cl | -2.273166 | -0.116351 | -0.000011 |

---

## Statistical Thermodynamic Analysis

Temperature= 298.150 Kelvin Pressure= 1.00000 Atm

---

SCF Energy= -1026.30057239 Predicted Change= -9.211125D-08

MP2 Energy= -1028.10858143 MP2 Cor. Energy= -1.80800904

Zero-point correction (ZPE)= -1028.5895 0.04574

Internal Energy (U)= -1028.5845 0.05072

Enthalpy (H)= -1028.5836 0.05167

Gibbs Free Energy (G)= -1028.6189 0.01629

---

Frequencies -- 220.9576 302.8591 433.4311

Supporting Information: **3radicalisothiazole.out**


---

Using Gaussian 03: IA32L-G03RevC.02 12-Jun-2004

---

```
#g3b3 scf=maxcyc=1000
#N Geom=AllCheck Guess=Read SCRF=Check B3LYP/6-31G(d) Freq
#N Geom=AllCheck Guess=Read SCRF=Check QCISD(T,E4T)/6-31G(d)
#N Geom=AllCheck Guess=Read SCRF=Check MP4/6-31+G(d)
#N Geom=AllCheck Guess=Read SCRF=Check MP4/6-31G(2df,p)
#N Geom=AllCheck Guess=Read SCRF=Check MP2=Full/GTLarge

Pointgroup= C1  Stoichiometry= C3H2NS(2)  C1[X(C3H2NS)]  #Atoms= 7
Charge = 0  Multiplicity = 2
```

---

```
SCF Energy= -566.724291848  Predicted Change= -2.319017D-07
MP2 Energy= -567.9797246302  Correl. Energy= -1.25543278
```

---

```
Optimization completed.      {Found      2      times}
Item  Max Val.  Criteria  Pass?  RMS Val.  Criteria  Pass?
Force  0.00022 || 0.00045 [ YES ]   0.00005 || 0.00030 [ YES ]
Displ  0.00085 || 0.00180 [ YES ]   0.00085 || 0.00180 [ YES ]
```

---

```
Atomic      Coordinates (Angstroms)
Type       X          Y          Z
```

---

```
C   -0.970791   1.027489  -0.000003
C   -1.452713  -0.314444  -0.000003
C   -0.363428  -1.145684   0.000031
S    1.105251  -0.227560  -0.000037
H   -2.490082  -0.619958  -0.000029
H   -0.352497  -2.229299   0.000028
N    0.268593   1.298007   0.000062
```

---

## Statistical Thermodynamic Analysis

```
Temperature= 298.150 Kelvin  Pressure= 1.00000 Atm
```

---

```
SCF Energy=  -566.724291848 Predicted Change= -2.319017D-07
MP2 Energy=  -567.9797246302  MP2 Cor. Energy= -1.25543278
Zero-point correction (ZPE)=      -568.3145  0.04226
Internal Energy (U)=                -568.3105  0.04624
Enthalpy (H)=                       -568.3096  0.04718
Gibbs Free Energy (G)=               -568.3423  0.01449
```

---

```
Frequencies --  454.0770          533.7231          576.9224
```

Supporting Information: **34dichloroisothiazole.out**


---

Using Gaussian 03: AM64L-G03RevC.02 12-Jun-2004

---

```
# g3b3 scf=maxcyc=1000
#N Geom=AllCheck Guess=Read SCRF=Check B3LYP/6-31G(d) Freq
#N Geom=AllCheck Guess=Read SCRF=Check QCISD(T,E4T)/6-31G(d)
#N Geom=AllCheck Guess=Read SCRF=Check MP4/6-31+G(d)
#N Geom=AllCheck Guess=Read SCRF=Check MP4/6-31G(2df,p)
#N Geom=AllCheck Guess=Read SCRF=Check MP2=Full/GTLarge
```

---

Pointgroup= C1 Stoichiometry= C3HCl2NS C1[X(C3HCl2NS)] #Atoms= 8
Charge = 0 Multiplicity = 1

---

```
SCF Energy= -1485.22235361 Predicted Change= -2.569976D-08
MP2 Energy= -1487.523394491 Correl. Energy= -2.30104088
```

---

```
Optimization completed.      {Found      2      times}
Item  Max Val.  Criteria  Pass?  RMS Val.  Criteria  Pass?
Force  0.00005 || 0.00045 [ YES ]   0.00001 || 0.00030 [ YES ]
Displ  0.00020 || 0.00180 [ YES ]   0.00020 || 0.00180 [ YES ]
```

---

```
Atomic      Coordinates (Angstroms)
Type        X          Y          Z
```

---

```
C      0.038695   0.702706   0.000023
C      0.132708  -0.731265   0.000033
C     -1.116844  -1.285173   0.000030
S     -2.287389  -0.022748  -0.000172
N     -1.159205   1.222899  -0.000060
Cl      1.428045   1.740785   0.000045
H     -1.375714  -2.335486   0.000070
Cl      1.616721  -1.621870   0.000108
```

---

## Statistical Thermodynamic Analysis

```
Temperature= 298.150 Kelvin   Pressure= 1.00000 Atm
```

---

```
SCF Energy=  -1485.22235361 Predicted Change= -2.569976D-08
MP2 Energy=  -1487.523394491   MP2 Cor. Energy= -2.30104088
Zero-point correction (ZPE)=    -1488.1874  0.03628
Internal Energy (U)=              -1488.1812  0.04244
Enthalpy (H)=                    -1488.1803  0.04338
Gibbs Free Energy (G)=            -1488.2190  0.00462
```

---

```
Frequencies -- 177.7101          178.3086          255.6405
```

Supporting Information: **3chloro4radicalisothiazole.out**

Using Gaussian 03: IA32L-G03RevC.02 12-Jun-2004

```
=====
# g3b3 scf=maxcyc=1000
#N Geom=AllCheck Guess=Read SCRF=Check B3LYP/6-31G(d) Freq
#N Geom=AllCheck Guess=Read SCRF=Check QCISD(T,E4T)/6-31G(d)
#N Geom=AllCheck Guess=Read SCRF=Check MP4/6-31+G(d)
#N Geom=AllCheck Guess=Read SCRF=Check MP4/6-31G(2df,p)
#N Geom=AllCheck Guess=Read SCRF=Check MP2=Full/GTLarge

Pointgroup= C1  Stoichiometry= C3HCINS(2)  C1[X(C3HCINS)]  #Atoms= 7
Charge = 0  Multiplicity = 2
=====
```

```
SCF Energy= -1025.64609812  Predicted Change= -1.049428D-07
MP2 Energy= -1027.38218529  Correl. Energy= -1.73608717
=====
```

```
Optimization completed.      {Found      2      times}
Item  Max Val.  Criteria  Pass?  RMS Val.  Criteria  Pass?
Force  0.00018 || 0.00045 [ YES ]   0.00005 || 0.00030 [ YES ]
Displ  0.00042 || 0.00180 [ YES ]   0.00042 || 0.00180 [ YES ]
=====
```

```
Atomic      Coordinates (Angstroms)
Type        X          Y          Z
=====
```

```
  C      0.557715   0.064881   0.000001
  C     -0.147020   1.294009   0.000084
  C     -1.490179   1.152512   0.000023
  S     -1.806651   -0.561317  -0.000059
  N     -0.179399  -1.018193  -0.000098
  Cl     2.289094   -0.050371   0.000054
  H     -2.275489   1.896322   0.000059
=====
```

## Statistical Thermodynamic Analysis

Temperature= 298.150 Kelvin Pressure= 1.00000 Atm

```
=====
SCF Energy=  -1025.64609812 Predicted Change= -1.049428D-07
MP2 Energy=  -1027.38218529 MP2 Cor. Energy= -1.73608717
Zero-point correction (ZPE)=    -1027.9064  0.03312
Internal Energy (U)=              -1027.9015  0.03808
Enthalpy (H)=                    -1027.9005  0.03903
Gibbs Free Energy (G)=            -1027.9365  0.00304
=====
```

```
Frequencies --  218.5079          301.5886          431.8266
=====
```



Supporting Information: **45dichloroisothiazole.out**

-----  
 Using Gaussian 03: AM64L-G03RevC.02 12-Jun-2004  
 =====

```
# g3b3 scf=maxcyc=1000
#N Geom=AllCheck Guess=Read SCRF=Check B3LYP/6-31G(d) Freq
#N Geom=AllCheck Guess=Read SCRF=Check QCISD(T,E4T)/6-31G(d)
#N Geom=AllCheck Guess=Read SCRF=Check MP4/6-31+G(d)
#N Geom=AllCheck Guess=Read SCRF=Check MP4/6-31G(2df,p)
#N Geom=AllCheck Guess=Read SCRF=Check MP2=Full/GTLarge
```

-----  
 Pointgroup= C1 Stoichiometry= C3HCl2NS C1[X(C3HCl2NS)] #Atoms= 8  
 Charge = 0 Multiplicity = 1  
 -----

```
SCF Energy= -1485.21654586 Predicted Change= -9.253061D-07
MP2 Energy= -1487.518781664 Correl. Energy= -2.3022358
=====
```

```
Optimization completed.      {Found      2      times}
Item  Max Val.  Criteria  Pass?  RMS Val.  Criteria  Pass?
Force  0.00027 || 0.00045 [ YES ]  0.00011 || 0.00030 [ YES ]
Displ  0.00121 || 0.00180 [ YES ]  0.00121 || 0.00180 [ YES ]
-----
```

| Atomic Type | Coordinates (Angstroms) |   |   |
|-------------|-------------------------|---|---|
|             | X                       | Y | Z |

|    |           |           |           |
|----|-----------|-----------|-----------|
| C  | -0.376870 | -1.783480 | 0.000137  |
| C  | 0.488280  | -0.648857 | -0.000119 |
| C  | -0.245508 | 0.512458  | 0.000049  |
| S  | -1.932511 | 0.112953  | -0.000293 |
| N  | -1.669807 | -1.548230 | 0.000429  |
| Cl | 2.215446  | -0.752395 | -0.000112 |
| H  | -0.025602 | -2.811237 | 0.000445  |
| Cl | 0.339790  | 2.126564  | 0.000162  |

## Statistical Thermodynamic Analysis

Temperature= 298.150 Kelvin Pressure= 1.00000 Atm  
 =====

```
SCF Energy= -1485.21654586 Predicted Change= -9.253061D-07
MP2 Energy= -1487.518781664 MP2 Cor. Energy= -2.3022358
Zero-point correction (ZPE)= -1488.1826 0.03655
Internal Energy (U)= -1488.1764 0.04276
Enthalpy (H)= -1488.1755 0.04370
Gibbs Free Energy (G)= -1488.2144 0.00479
-----
```

Frequencies -- 165.1981 165.8131 256.7317

Supporting Information: **4chloro3radicalisothiazole.out**


---

Using Gaussian 03: IA32L-G03RevC.02 12-Jun-2004

---

```
# g3b3 scf=maxcyc=1000
#N Geom=AllCheck Guess=Read SCRF=Check B3LYP/6-31G(d) Freq
#N Geom=AllCheck Guess=Read SCRF=Check QCISD(T,E4T)/6-31G(d)
#N Geom=AllCheck Guess=Read SCRF=Check MP4/6-31+G(d)
#N Geom=AllCheck Guess=Read SCRF=Check MP4/6-31G(2df,p)
#N Geom=AllCheck Guess=Read SCRF=Check MP2=Full/GTLarge
```

---

Pointgroup= C1 Stoichiometry= C3HCINS(2) C1[X(C3HCINS)] #Atoms= 7
Charge = 0 Multiplicity = 2

---

```
SCF Energy= -1025.64780634 Predicted Change= -3.536903D-07
MP2 Energy= -1027.389600622 Correl. Energy= -1.74179427
```

---

```
Optimization completed.      {Found      2      times}
Item  Max Val.  Criteria  Pass?  RMS Val.  Criteria  Pass?
Force  0.00029 || 0.00045 [ YES ]   0.00009 || 0.00030 [ YES ]
Displ  0.00126 || 0.00180 [ YES ]   0.00126 || 0.00180 [ YES ]
```

---

```
Atomic      Coordinates (Angstroms)
Type        X          Y          Z
```

---

```
C      0.162671   1.248559  -0.000104
C     -0.594997   0.039854  -0.000065
C      0.270066  -1.021622   0.000059
S      1.903774  -0.449080   0.000237
N      1.428556   1.222672  -0.000036
H      0.026491  -2.076424   0.000110
Cl     -2.324307  -0.052809  -0.000177
```

---

## Statistical Thermodynamic Analysis

```
Temperature= 298.150 Kelvin Pressure= 1.00000 Atm
```

---

```
SCF Energy= -1025.64780634 Predicted Change= -3.536903D-07
MP2 Energy= -1027.389600622 MP2 Cor. Energy= -1.74179427
Zero-point correction (ZPE)= -1027.9127 0.03290
Internal Energy (U)= -1027.9077 0.03798
Enthalpy (H)= -1027.9067 0.03893
Gibbs Free Energy (G)= -1027.9429 0.00271
```

---

```
Frequencies -- 213.9297      283.0222      427.7408
```

Supporting Information: **4chloro5radicalisothiazole.out**


---

Using Gaussian 03: IA32L-G03RevC.02 12-Jun-2004

---

```
# g3b3 scf=maxcyc=1000
#N Geom=AllCheck Guess=Read SCRF=Check B3LYP/6-31G(d) Freq
#N Geom=AllCheck Guess=Read SCRF=Check QCISD(T,E4T)/6-31G(d)
#N Geom=AllCheck Guess=Read SCRF=Check MP4/6-31+G(d)
#N Geom=AllCheck Guess=Read SCRF=Check MP4/6-31G(2df,p)
#N Geom=AllCheck Guess=Read SCRF=Check MP2=Full/GTLarge
```

---

Pointgroup= C1 Stoichiometry= C3HCINS(2) C1[X(C3HCINS)] #Atoms= 7
Charge = 0 Multiplicity = 2

---

```
SCF Energy= -1025.64179142 Predicted Change= -6.625751D-07
MP2 Energy= -1027.375649578 Correl. Energy= -1.73385815
```

---

```
Optimization completed.      {Found      2      times}
Item  Max Val.  Criteria  Pass?  RMS Val.  Criteria  Pass?
Force  0.00028 || 0.00045 [ YES ]   0.00010 || 0.00030 [ YES ]
Displ  0.00131 || 0.00180 [ YES ]   0.00131 || 0.00180 [ YES ]
```

---

```
Atomic      Coordinates (Angstroms)
Type        X          Y          Z
```

---

```
C      0.135718   1.208013   0.000425
C     -0.591546  -0.021360   0.000180
C      0.299169  -1.052326  -0.000526
S      1.910527  -0.517149   0.000252
N      1.452102   1.119952  -0.000675
Cl     -2.321952  -0.150885  -0.000013
H     -0.320012   2.193805   0.000442
```

---

## Statistical Thermodynamic Analysis

```
Temperature= 298.150 Kelvin Pressure= 1.00000 Atm
```

---

```
SCF Energy= -1025.64179142 Predicted Change= -6.625751D-07
MP2 Energy= -1027.375649578 MP2 Cor. Energy= -1.73385815
Zero-point correction (ZPE)= -1027.9014 0.03342
Internal Energy (U)= -1027.8964 0.03842
Enthalpy (H)= -1027.8955 0.03936
Gibbs Free Energy (G)= -1027.9316 0.00323
```

---

```
Frequencies -- 202.1640          272.5643          427.7037
```

Supporting Information: **4chloroisothiazole2.out**


---

Using Gaussian 03: IA32L-G03RevC.02 12-Jun-2004

---

# g3b3

#N Geom=AllCheck Guess=Read SCRF=Check B3LYP/6-31G(d) Freq

#N Geom=AllCheck Guess=Read SCRF=Check QCISD(T,E4T)/6-31G(d)

#N Geom=AllCheck Guess=Read SCRF=Check MP4/6-31+G(d)

#N Geom=AllCheck Guess=Read SCRF=Check MP4/6-31G(2df,p)

#N Geom=AllCheck Guess=Read SCRF=Check MP2=Full/GTLarge

---

Pointgroup= C1 Stoichiometry= C3H2CINS C1[X(C3H2CINS)] #Atoms= 8

Charge = 0 Multiplicity = 1

---

SCF Energy= -1026.29588464 Predicted Change= -5.501735D-07

MP2 Energy= -1028.10475817 Correl. Energy= -1.80887353

---

Optimization completed. {Found 1 times}

| Item  | Max Val. | Criteria | Pass?   | RMS Val. | Criteria | Pass?   |
|-------|----------|----------|---------|----------|----------|---------|
| Force | 0.00017  | 0.00045  | [ YES ] | 0.00007  | 0.00030  | [ YES ] |
| Displ | 0.00274  | 0.00180  | [ NO ]  | 0.00274  | 0.00180  | [ YES ] |

---

| Atomic<br>Type | Coordinates (Angstroms) |   |   |
|----------------|-------------------------|---|---|
|                | X                       | Y | Z |

---

|    |           |           |           |
|----|-----------|-----------|-----------|
| C  | -0.140985 | 1.239043  | 0.000034  |
| C  | 0.573781  | 0.002562  | 0.000018  |
| C  | -0.280757 | -1.066442 | 0.000179  |
| S  | -1.894945 | -0.468474 | -0.000094 |
| H  | 0.328369  | 2.218447  | -0.000014 |
| H  | -0.033565 | -2.119374 | 0.000259  |
| N  | -1.452436 | 1.154942  | 0.000086  |
| Cl | 2.310537  | -0.102297 | -0.000043 |

---

## Statistical Thermodynamic Analysis

Temperature= 298.150 Kelvin Pressure= 1.00000 Atm

---

SCF Energy= -1026.29588464 Predicted Change= -5.501735D-07

MP2 Energy= -1028.10475817 MP2 Cor. Energy= -1.80887353

Zero-point correction (ZPE)= -1028.5861 0.04584

Internal Energy (U)= -1028.5811 0.05085

Enthalpy (H)= -1028.5802 0.05180

Gibbs Free Energy (G)= -1028.6156 0.01632

---

Frequencies -- 216.0863 280.0528 429.0316

Supporting Information: **4radicalisothiazole.out**

-----  
 Using Gaussian 03: IA32L-G03RevC.02 12-Jun-2004  
 =====

```
# g3b3 scf=maxcyc=1000
#N Geom=AllCheck Guess=Read SCRF=Check B3LYP/6-31G(d) Freq
#N Geom=AllCheck Guess=Read SCRF=Check QCISD(T,E4T)/6-31G(d)
#N Geom=AllCheck Guess=Read SCRF=Check MP4/6-31+G(d)
#N Geom=AllCheck Guess=Read SCRF=Check MP4/6-31G(2df,p)
#N Geom=AllCheck Guess=Read SCRF=Check MP2=Full/GTLarge
```

-----  
 Pointgroup= C1 Stoichiometry= C3H2NS(2) C1[X(C3H2NS)] #Atoms= 7  
 Charge = 0 Multiplicity = 2  
 -----

```
SCF Energy= -566.718399094 Predicted Change= -5.705486D-07
MP2 Energy= -567.9637709083 Correl. Energy= -1.24537181
=====
```

```
Optimization completed.      {Found      2      times}
Item  Max Val.  Criteria  Pass?  RMS Val.  Criteria  Pass?
Force  0.00025 || 0.00045 [ YES ]  0.00010 || 0.00030 [ YES ]
Displ  0.00140 || 0.00180 [ YES ]  0.00140 || 0.00180 [ YES ]
-----
```

```
Atomic      Coordinates (Angstroms)
Type        X          Y          Z
-----
```

```
  C    -1.409636   -0.294527   -0.000075
  C    -0.999834    1.061626    0.000069
  C     0.340835    1.248066    0.000135
  S     1.053463   -0.338215   -0.000096
  H    -2.431658   -0.658105   -0.000024
  H     0.923974    2.158947    0.000216
  N    -0.419415   -1.168628    0.000082
-----
```

## Statistical Thermodynamic Analysis

Temperature= 298.150 Kelvin Pressure= 1.00000 Atm  
 =====

```
SCF Energy= -566.718399094 Predicted Change= -5.705486D-07
MP2 Energy= -567.9637709083 MP2 Cor. Energy= -1.24537181
Zero-point correction (ZPE)= -568.3043 0.04261
Internal Energy (U)= -568.3004 0.04649
Enthalpy (H)= -568.2995 0.04744
Gibbs Free Energy (G)= -568.3320 0.01490
-----
```

```
Frequencies -- 460.3111          571.6772          620.3650
```

Supporting Information: **Schloro3radicalisothiazole.out**

-----  
 Using Gaussian 03: IA32L-G03RevC.02 12-Jun-2004  
 =====

```
# g3b3 scf=maxcyc=1000
#N Geom=AllCheck Guess=Read SCRF=Check B3LYP/6-31G(d) Freq
#N Geom=AllCheck Guess=Read SCRF=Check QCISD(T,E4T)/6-31G(d)
#N Geom=AllCheck Guess=Read SCRF=Check MP4/6-31+G(d)
#N Geom=AllCheck Guess=Read SCRF=Check MP4/6-31G(2df,p)
#N Geom=AllCheck Guess=Read SCRF=Check MP2=Full/GTLarge
```

-----  
 Pointgroup= C1 Stoichiometry= C3HCINS(2) C1[X(C3HCINS)] #Atoms= 7  
 Charge = 0 Multiplicity = 2  
 -----

```
SCF Energy= -1025.64751259 Predicted Change= -9.074789D-07
MP2 Energy= -1027.391446952 Correl. Energy= -1.74393436
=====
```

```
Optimization completed.      {Found 2 times}
Item  Max Val.  Criteria  Pass?  RMS Val.  Criteria  Pass?
Force  0.00023 || 0.00045 [ YES ]  0.00009 || 0.00030 [ YES ]
Displ  0.00165 || 0.00180 [ YES ]  0.00165 || 0.00180 [ YES ]
-----
```

```
Atomic      Coordinates (Angstroms)
Type        X          Y          Z
-----
```

```
 C    1.660558    1.130259   -0.000180
  C    0.268212    1.420556    0.000652
  C   -0.386951    0.215967   -0.000265
  S    0.735399   -1.120496    0.000404
  H   -0.194966    2.396961    0.001174
  N    2.109825   -0.055528   -0.000781
  Cl   -2.093595   -0.040060   -0.000201
-----
```

## Statistical Thermodynamic Analysis

Temperature= 298.150 Kelvin Pressure= 1.00000 Atm  
 =====

```
SCF Energy= -1025.64751259 Predicted Change= -9.074789D-07
MP2 Energy= -1027.391446952 MP2 Cor. Energy= -1.74393436
Zero-point correction (ZPE)= -1027.9135 0.03293
Internal Energy (U)= -1027.9084 0.03804
Enthalpy (H)= -1027.9075 0.03898
Gibbs Free Energy (G)= -1027.9437 0.00275
-----
```

```
Frequencies -- 221.8919          255.5563          428.0570
```

Supporting Information: **Schloro4radicalisothiazole.out**

-----  
 Using Gaussian 03: IA32L-G03RevC.02 12-Jun-2004  
 =====

```
#g3b3 scf=maxcyc=1000
#N Geom=AllCheck Guess=Read SCRF=Check B3LYP/6-31G(d) Freq
#N Geom=AllCheck Guess=Read SCRF=Check QCISD(T,E4T)/6-31G(d)
#N Geom=AllCheck Guess=Read SCRF=Check MP4/6-31+G(d)
#N Geom=AllCheck Guess=Read SCRF=Check MP4/6-31G(2df,p)
#N Geom=AllCheck Guess=Read SCRF=Check MP2=Full/GTLarge
```

-----  
 Pointgroup= C1 Stoichiometry= C3HCINS(2) C1[X(C3HCINS)] #Atoms= 7  
 Charge = 0 Multiplicity = 2  
 -----

```
SCF Energy= -1025.64020282 Predicted Change= -1.220253D-06
MP2 Energy= -1027.372443173 Correl. Energy= -1.73224035
=====
```

```
Optimization completed.      {Found      2      times}
Item  Max Val.  Criteria  Pass?  RMS Val.  Criteria  Pass?
Force  0.00040 || 0.00045 [ YES ]   0.00013 || 0.00030 [ YES ]
Displ  0.00134 || 0.00180 [ YES ]   0.00134 || 0.00180 [ YES ]
-----
```

| Atomic<br>Type | Coordinates (Angstroms) |   |   |
|----------------|-------------------------|---|---|
|                | X                       | Y | Z |

|    |           |           |           |
|----|-----------|-----------|-----------|
| C  | -1.716301 | 1.091768  | 0.000316  |
| C  | -0.326501 | 1.347917  | 0.000159  |
| C  | 0.441964  | 0.232820  | -0.000227 |
| S  | -0.641504 | -1.135789 | 0.000190  |
| N  | -2.043340 | -0.188845 | 0.000064  |
| H  | -2.506690 | 1.834612  | 0.000425  |
| Cl | 2.157598  | 0.095582  | -0.000318 |

## Statistical Thermodynamic Analysis

Temperature= 298.150 Kelvin Pressure= 1.00000 Atm  
 =====

```
SCF Energy= -1025.64020282 Predicted Change= -1.220253D-06
MP2 Energy= -1027.372443173 MP2 Cor. Energy= -1.73224035
Zero-point correction (ZPE)= -1027.9009 0.03343
Internal Energy (U)= -1027.8959 0.03843
Enthalpy (H)= -1027.8949 0.03938
Gibbs Free Energy (G)= -1027.9310 0.00327
-----
```

```
Frequencies -- 212.4681      251.6502      433.5557
```

Supporting Information: **Schloroisothiazole.out**

-----  
 Using Gaussian 03: IA32L-G03RevC.02 12-Jun-2004  
 =====

```
# g3b3 scf=restart
#N Geom=AllCheck Guess=Read SCRF=Check B3LYP/6-31G(d) Freq
#N Geom=AllCheck Guess=Read SCRF=Check QCISD(T,E4T)/6-31G(d)
#N Geom=AllCheck Guess=Read SCRF=Check MP4/6-31+G(d)
#N Geom=AllCheck Guess=Read SCRF=Check MP4/6-31G(2df,p)
#N Geom=AllCheck Guess=Read SCRF=Check MP2=Full/GTLarge
```

-----  
 Pointgroup= C1 Stoichiometry= C3H2CINS C1[X(C3H2CINS)] #Atoms= 8  
 Charge = 0 Multiplicity = 1  
 -----

SCF Energy= -1026.29321676 Predicted Change= -5.332559D-07  
 MP2 Energy= -1028.103184986 Correl. Energy= -1.80996822  
 =====

Optimization completed. {Found 1 times}  
 Item Max Val. Criteria Pass? RMS Val. Criteria Pass?  
 Force 0.00027 || 0.00045 [ YES ] 0.00007 || 0.00030 [ YES ]  
 Displ 0.00257 || 0.00180 [ NO ] 0.00257 || 0.00180 [ YES ]  
 -----

| Atomic<br>Type | Coordinates (Angstroms) |   |   |
|----------------|-------------------------|---|---|
|                | X                       | Y | Z |

|    |           |           |           |
|----|-----------|-----------|-----------|
| C  | 1.693700  | 1.042986  | 0.000123  |
| C  | 0.304470  | 1.355584  | 0.000012  |
| C  | -0.423397 | 0.194953  | -0.000027 |
| S  | 0.646544  | -1.170050 | 0.000082  |
| H  | 2.488537  | 1.784510  | 0.000122  |
| H  | -0.119150 | 2.351902  | 0.000048  |
| N  | 2.038200  | -0.229946 | -0.000241 |
| Cl | -2.142949 | 0.037228  | -0.000026 |

## Statistical Thermodynamic Analysis

Temperature= 298.150 Kelvin Pressure= 1.00000 Atm  
 =====

SCF Energy= -1026.29321676 Predicted Change= -5.332559D-07  
 MP2 Energy= -1028.103184986 MP2 Cor. Energy= -1.80996822  
 Zero-point correction (ZPE)= -1028.5838 0.04595  
 Internal Energy (U)= -1028.5788 0.05096  
 Enthalpy (H)= -1028.5778 0.05191  
 Gibbs Free Energy (G)= -1028.6133 0.01643  
 -----

Frequencies -- 221.8904 254.9597 439.0508



Supporting Information: **5radicalisothiazole.out**

-----  
 Using Gaussian 03: IA32L-G03RevC.02 12-Jun-2004  
 =====

```
#g3b3 scf=maxcyc=1000
#N Geom=AllCheck Guess=Read SCRF=Check B3LYP/6-31G(d) Freq
#N Geom=AllCheck Guess=Read SCRF=Check QCISD(T,E4T)/6-31G(d)
#N Geom=AllCheck Guess=Read SCRF=Check MP4/6-31+G(d)
#N Geom=AllCheck Guess=Read SCRF=Check MP4/6-31G(2df,p)
#N Geom=AllCheck Guess=Read SCRF=Check MP2=Full/GTLarge
```

-----  
 Pointgroup= C1 Stoichiometry= C3H2NS(2) C1[X(C3H2NS)] #Atoms= 7  
 Charge = 0 Multiplicity = 2  
 -----

```
SCF Energy= -566.717786736 Predicted Change= -8.079051D-07
MP2 Energy= -567.9651799801 Correl. Energy= -1.24739324
=====
```

```
Optimization completed.      {Found      2      times}
Item  Max Val.  Criteria  Pass?  RMS Val.  Criteria  Pass?
Force  0.00022 || 0.00045 [ YES ]  0.00009 || 0.00030 [ YES ]
Displ  0.00143 || 0.00180 [ YES ]  0.00143 || 0.00180 [ YES ]
=====
```

```
Atomic      Coordinates (Angstroms)
Type        X          Y          Z
=====
```

```
 C   -1.151830   0.722220  -0.000445
  C   -1.311922  -0.697787  -0.000153
  C   -0.064635  -1.246648   0.000666
  S    1.178709  -0.083753  -0.000315
  H   -1.972704   1.435273  -0.000583
  H   -2.253534  -1.231847  -0.000157
  N    0.076745   1.209988   0.000766
=====
```

## Statistical Thermodynamic Analysis

Temperature= 298.150 Kelvin Pressure= 1.00000 Atm  
 =====

```
SCF Energy= -566.717786736 Predicted Change= -8.079051D-07
MP2 Energy= -567.9651799801 MP2 Cor. Energy= -1.24739324
Zero-point correction (ZPE)= -568.3029 0.04268
Internal Energy (U)= -568.2990 0.04656
Enthalpy (H)= -568.2981 0.04751
Gibbs Free Energy (G)= -568.3306 0.01496
=====
```

```
Frequencies -- 434.7143          586.1959          612.0214
```

**Chloroisoxazoles**Supporting Information: **3chloroisoxazole.out**-----  
Using Gaussian 03: AM64L-G03RevC.02 12-Jun-2004  
=====

# g3b3

#N Geom=AllCheck Guess=Read SCRF=Check B3LYP/6-31G(d) Freq

#N Geom=AllCheck Guess=Read SCRF=Check QCISD(T,E4T)/6-31G(d)

#N Geom=AllCheck Guess=Read SCRF=Check MP4/6-31+G(d)

#N Geom=AllCheck Guess=Read SCRF=Check MP4/6-31G(2df,p)

#N Geom=AllCheck Guess=Read SCRF=Check MP2=Full/GTLarge  
-----

Pointgroup= C1 Stoichiometry= C3H2ClNO C1[X(C3H2ClNO)] #Atoms= 8

Charge = 0 Multiplicity = 1  
-----

SCF Energy= -703.592585086 Predicted Change= -1.883694D-07

MP2 Energy= -705.2048586916 Correl. Energy= -1.6122736  
=====

Optimization completed. {Found 2 times}

Item Max Val. Criteria Pass? RMS Val. Criteria Pass?

Force 0.00016 || 0.00045 [ YES ] 0.00005 || 0.00030 [ YES ]

Displ 0.00077 || 0.00180 [ YES ] 0.00077 || 0.00180 [ YES ]  
-----

Atomic Coordinates (Angstroms)

Type X Y Z  
-----

|    |           |           |           |
|----|-----------|-----------|-----------|
| C  | -1.846532 | 0.591647  | 0.000019  |
| C  | -0.609007 | 1.150837  | 0.000027  |
| C  | 0.240395  | 0.008186  | -0.000033 |
| H  | -2.848566 | 0.996867  | -0.000022 |
| H  | -0.326345 | 2.191586  | 0.000003  |
| N  | -0.413497 | -1.129232 | 0.000234  |
| O  | -1.758685 | -0.752195 | -0.000059 |
| Cl | 1.966455  | 0.013512  | -0.000073 |

-----  
Statistical Thermodynamic AnalysisTemperature= 298.150 Kelvin Pressure= 1.00000 Atm  
=====

SCF Energy= -703.592585086 Predicted Change= -1.883694D-07

MP2 Energy= -705.2048586916 MP2 Cor. Energy= -1.6122736

Zero-point correction (ZPE)= -705.5766 0.04869

Internal Energy (U)= -705.5720 0.05328

Enthalpy (H)= -705.5710 0.05423

Gibbs Free Energy (G)= -705.6052 0.02008  
-----

Frequencies -- 258.8083 313.7285 488.2308

Supporting Information: **3radicalisoxazole.out**


---

Using Gaussian 03: AM64L-G03RevC.02 12-Jun-2004

---

# g3b3

#N Geom=AllCheck Guess=Read SCRF=Check B3LYP/6-31G(d) Freq

#N Geom=AllCheck Guess=Read SCRF=Check QCISD(T,E4T)/6-31G(d)

#N Geom=AllCheck Guess=Read SCRF=Check MP4/6-31+G(d)

#N Geom=AllCheck Guess=Read SCRF=Check MP4/6-31G(2df,p)

#N Geom=AllCheck Guess=Read SCRF=Check MP2=Full/GTLarge

---

Pointgroup= C1 Stoichiometry= C3H2NO(2) C1[X(C3H2NO)] #Atoms= 7

Charge = 0 Multiplicity = 2

---

SCF Energy= -244.012408866 Predicted Change= -2.498017D-07

MP2 Energy= -245.0720692209 Correl. Energy= -1.05966035

---

Optimization completed. {Found 2 times}

| Item  | Max Val. | Criteria | Pass?   | RMS Val. | Criteria | Pass?   |
|-------|----------|----------|---------|----------|----------|---------|
| Force | 0.00011  | 0.00045  | [ YES ] | 0.00006  | 0.00030  | [ YES ] |
| Displ | 0.00105  | 0.00180  | [ YES ] | 0.00105  | 0.00180  | [ YES ] |

---

| Atomic Type | Coordinates (Angstroms) |   |   |
|-------------|-------------------------|---|---|
|             | X                       | Y | Z |

---

|   |           |           |           |
|---|-----------|-----------|-----------|
| C | 0.753450  | 0.761281  | 0.000201  |
| C | 1.081216  | -0.560891 | -0.000095 |
| C | -0.210770 | -1.152910 | 0.000207  |
| H | 1.346199  | 1.666280  | 0.000181  |
| H | 2.052369  | -1.028508 | -0.000197 |
| N | -1.211592 | -0.355432 | 0.000330  |
| O | -0.582600 | 0.945671  | -0.000521 |

---

## Statistical Thermodynamic Analysis

Temperature= 298.150 Kelvin Pressure= 1.00000 Atm

---

SCF Energy= -244.012408866 Predicted Change= -2.498017D-07

MP2 Energy= -245.0720692209 MP2 Cor. Energy= -1.05966035

Zero-point correction (ZPE)= -245.2948 0.04479

Internal Energy (U)= -245.2911 0.04843

Enthalpy (H)= -245.2902 0.04937

Gibbs Free Energy (G)= -245.3216 0.01799

---

Frequencies -- 575.2077 596.2398 696.0390

Supporting Information: **4chloroisoxazole.out**

-----  
 Using Gaussian 03: IA32L-G03RevC.02 12-Jun-2004  
 =====

```
# g3b3 scf=maxcycle=1000 qcisd=maxcycle=1000
#N Geom=AllCheck Guess=Read SCRF=Check B3LYP/6-31G(d) Freq
#N Geom=AllCheck Guess=Read SCRF=Check QCISD(T,E4T)/6-31G(d)
#N Geom=AllCheck Guess=Read SCRF=Check MP4/6-31+G(d)
#N Geom=AllCheck Guess=Read SCRF=Check MP4/6-31G(2df,p)
#N Geom=AllCheck Guess=Read SCRF=Check MP2=Full/GTLarge
```

-----  
 Pointgroup= C1 Stoichiometry= C3H2ClNO C1[X(C3H2ClNO)] #Atoms= 8  
 Charge = 0 Multiplicity = 1  
 -----

```
SCF Energy= -703.588991916 Predicted Change= -4.765970D-07
MP2 Energy= -705.2015505137 Correl. Energy= -1.61255859
=====
```

```
Optimization completed.      {Found      2      times}
Item  Max Val.  Criteria  Pass?  RMS Val.  Criteria  Pass?
Force  0.00012 || 0.00045 [ YES ]  0.00004 || 0.00030 [ YES ]
Displ  0.00165 || 0.00180 [ YES ]  0.00165 || 0.00180 [ YES ]
-----
```

| Atomic<br>Type | Coordinates (Angstroms) |   |   |
|----------------|-------------------------|---|---|
|                | X                       | Y | Z |

|    |           |           |           |
|----|-----------|-----------|-----------|
| C  | 0.564467  | -1.086091 | 0.000371  |
| C  | -0.270216 | -0.010807 | -0.000002 |
| C  | 0.608486  | 1.108605  | 0.000036  |
| O  | 1.839700  | -0.663289 | -0.000651 |
| H  | 0.401553  | -2.153591 | 0.000403  |
| H  | 0.356771  | 2.161081  | 0.000053  |
| N  | 1.865510  | 0.736408  | 0.000838  |
| Cl | -1.997113 | 0.004336  | -0.000208 |

## Statistical Thermodynamic Analysis

Temperature= 298.150 Kelvin Pressure= 1.00000 Atm  
 =====

```
SCF Energy= -703.588991916 Predicted Change= -4.765970D-07
MP2 Energy= -705.2015505137 MP2 Cor. Energy= -1.61255859
Zero-point correction (ZPE)= -705.5741 0.04879
Internal Energy (U)= -705.5695 0.05341
Enthalpy (H)= -705.5686 0.05435
Gibbs Free Energy (G)= -705.6028 0.02009
-----
```

Frequencies -- 255.9766 290.1499 482.6895

Supporting Information: **4radicalisoxazole.out**


---

Using Gaussian 03: IA32L-G03RevC.02 12-Jun-2004

---

```
#g3b3 scf=maxcycle=8000
#N Geom=AllCheck Guess=Read SCRF=Check B3LYP/6-31G(d) Freq
#N Geom=AllCheck Guess=Read SCRF=Check QCISD(T,E4T)/6-31G(d)
#N Geom=AllCheck Guess=Read SCRF=Check MP4/6-31+G(d)
#N Geom=AllCheck Guess=Read SCRF=Check MP4/6-31G(2df,p)
#N Geom=AllCheck Guess=Read SCRF=Check MP2=Full/GTLarge
```

---

```
Pointgroup= C1  Stoichiometry= C3H2NO(2)  C1[X(C3H2NO)]  #Atoms= 7
Charge = 0  Multiplicity = 2
```

---

```
SCF Energy= -244.007733483  Predicted Change= -4.001078D-07
MP2 Energy= -245.0579830589  Correl. Energy= -1.05024957
```

---

```
Optimization completed.      {Found      2      times}
Item  Max Val.  Criteria  Pass?  RMS Val.  Criteria  Pass?
Force  0.00023 || 0.00045 [ YES ]   0.00009 || 0.00030 [ YES ]
Displ  0.00092 || 0.00180 [ YES ]   0.00092 || 0.00180 [ YES ]
```

---

```
Atomic      Coordinates (Angstroms)
Type        X          Y          Z
```

---

```
 C    1.097743   0.394624   0.000051
  C    0.026710   1.222180  -0.000125
  C   -1.114272   0.388108   0.000122
  O    0.652078  -0.881844   0.000035
  H    2.168337   0.532002  -0.000001
  H   -2.165187   0.643557   0.000036
  N   -0.754408  -0.878611  -0.000087
```

---

## Statistical Thermodynamic Analysis

```
Temperature= 298.150 Kelvin  Pressure= 1.00000 Atm
```

---

```
SCF Energy= -244.007733483 Predicted Change= -4.001078D-07
MP2 Energy= -245.0579830589  MP2 Cor. Energy= -1.05024957
Zero-point correction (ZPE)= -245.2875  0.04549
Internal Energy (U)= -245.2840  0.04904
Enthalpy (H)= -245.2830  0.04999
Gibbs Free Energy (G)= -245.3143  0.01873
```

---

```
Frequencies -- 546.0150          630.2116          818.6892
```

Supporting Information: **Schloroisoxazole.out**

-----  
 Using Gaussian 03: AM64L-G03RevC.02 12-Jun-2004  
 =====

# g3b3

#N Geom=AllCheck Guess=Read SCRF=Check B3LYP/6-31G(d) Freq  
 #N Geom=AllCheck Guess=Read SCRF=Check QCISD(T,E4T)/6-31G(d)  
 #N Geom=AllCheck Guess=Read SCRF=Check MP4/6-31+G(d)  
 #N Geom=AllCheck Guess=Read SCRF=Check MP4/6-31G(2df,p)  
 #N Geom=AllCheck Guess=Read SCRF=Check MP2=Full/GTLarge

-----  
 Pointgroup= C1 Stoichiometry= C3H2ClNO C1[X(C3H2ClNO)] #Atoms= 8  
 Charge = 0 Multiplicity = 1  
 -----

SCF Energy= -703.591802169 Predicted Change= -6.559508D-08  
 MP2 Energy= -705.2048169273 Correl. Energy= -1.61301475  
 =====

Optimization completed. {Found 2 times}  
 Item Max Val. Criteria Pass? RMS Val. Criteria Pass?  
 Force 0.00008 || 0.00045 [ YES ] 0.00003 || 0.00030 [ YES ]  
 Displ 0.00037 || 0.00180 [ YES ] 0.00037 || 0.00180 [ YES ]  
 -----

Atomic Coordinates (Angstroms)  
 Type X Y Z  
 -----

|    |           |           |           |
|----|-----------|-----------|-----------|
| C  | -0.233558 | 0.097069  | -0.000012 |
| C  | 0.617847  | 1.159969  | -0.000078 |
| C  | 1.890486  | 0.528082  | 0.000113  |
| H  | 0.374835  | 2.210633  | -0.000133 |
| N  | 1.811727  | -0.783135 | -0.000136 |
| H  | 2.870458  | 0.989373  | 0.000173  |
| O  | 0.434178  | -1.065753 | 0.000096  |
| Cl | -1.944086 | 0.005720  | 0.000000  |

## Statistical Thermodynamic Analysis

Temperature= 298.150 Kelvin Pressure= 1.00000 Atm  
 =====

SCF Energy= -703.591802169 Predicted Change= -6.559508D-08  
 MP2 Energy= -705.2048169273 MP2 Cor. Energy= -1.61301475  
 Zero-point correction (ZPE)= -705.5762 0.04867  
 Internal Energy (U)= -705.5716 0.05327  
 Enthalpy (H)= -705.5706 0.05422  
 Gibbs Free Energy (G)= -705.6048 0.02003  
 -----

Frequencies -- 235.4615 309.7174 493.1686

Supporting Information: **Sradicalisoxazole.out**

-----  
 Using Gaussian 03: AM64L-G03RevC.02 12-Jun-2004  
 =====

#g3b3

#N Geom=AllCheck Guess=Read SCRF=Check B3LYP/6-31G(d) Freq  
 #N Geom=AllCheck Guess=Read SCRF=Check QCISD(T,E4T)/6-31G(d)  
 #N Geom=AllCheck Guess=Read SCRF=Check MP4/6-31+G(d)  
 #N Geom=AllCheck Guess=Read SCRF=Check MP4/6-31G(2df,p)  
 #N Geom=AllCheck Guess=Read SCRF=Check MP2=Full/GTLarge

-----  
 Pointgroup= C1 Stoichiometry= C3H2NO(2) C1[X(C3H2NO)] #Atoms= 7  
 Charge = 0 Multiplicity = 2  
 -----

SCF Energy= -244.009533093 Predicted Change= -9.874498D-08  
 MP2 Energy= -245.0703118514 Correl. Energy= -1.06077875  
 =====

Optimization completed. {Found 2 times}  
 Item Max Val. Criteria Pass? RMS Val. Criteria Pass?  
 Force 0.00009 || 0.00045 [ YES ] 0.00003 || 0.00030 [ YES ]  
 Displ 0.00051 || 0.00180 [ YES ] 0.00051 || 0.00180 [ YES ]  
 -----

Atomic Coordinates (Angstroms)  
 Type X Y Z  
 -----

|   |           |           |           |
|---|-----------|-----------|-----------|
| C | -0.074115 | -1.153480 | 0.000082  |
| C | 1.114815  | -0.489867 | 0.000025  |
| C | 0.660736  | 0.860596  | 0.000009  |
| H | 2.118543  | -0.881385 | 0.000042  |
| N | -0.649407 | 0.983767  | -0.000163 |
| H | 1.254691  | 1.767202  | -0.000039 |
| O | -1.129500 | -0.384460 | 0.000055  |

## Statistical Thermodynamic Analysis

Temperature= 298.150 Kelvin Pressure= 1.00000 Atm  
 =====

SCF Energy= -244.009533093 Predicted Change= -9.874498D-08  
 MP2 Energy= -245.0703118514 MP2 Cor. Energy= -1.06077875  
 Zero-point correction (ZPE)= -245.2925 0.04492  
 Internal Energy (U)= -245.2888 0.04853  
 Enthalpy (H)= -245.2879 0.04948  
 Gibbs Free Energy (G)= -245.3193 0.01812  
 -----

Frequencies -- 560.4896 626.3697 694.6342

**Chloropyrazines**

Supporting Information: 2chloropyrazine.out

-----  
Using Gaussian 03: AM64L-G03RevC.02 12-Jun-2004  
=====

#g3b3

#N Geom=AllCheck Guess=Read SCRF=Check B3LYP/6-31G(d) Freq

#N Geom=AllCheck Guess=Read SCRF=Check QCISD(T,E4T)/6-31G(d)

#N Geom=AllCheck Guess=Read SCRF=Check MP4/6-31+G(d)

#N Geom=AllCheck Guess=Read SCRF=Check MP4/6-31G(2df,p)

#N Geom=AllCheck Guess=Read SCRF=Check MP2=Full/GTLarge  
-----

Pointgroup= C1 Stoichiometry= C4H3ClN2 C1[X(C4H3ClN2)] #Atoms= 10

Charge = 0 Multiplicity = 1  
-----

SCF Energy= -721.691857790 Predicted Change= -1.936376D-07

MP2 Energy= -723.4563943229 Correl. Energy= -1.76453653  
=====

Optimization completed. {Found 2 times}

Item Max Val. Criteria Pass? RMS Val. Criteria Pass?

Force 0.00013 || 0.00045 [ YES ] 0.00004 || 0.00030 [ YES ]

Displ 0.00047 || 0.00180 [ YES ] 0.00047 || 0.00180 [ YES ]  
-----

Atomic Coordinates (Angstroms)

Type X Y Z  
-----

|    |           |           |           |
|----|-----------|-----------|-----------|
| C  | -0.459147 | -0.031645 | 0.000021  |
| C  | 0.228850  | 1.190478  | -0.000010 |
| N  | 1.560564  | 1.220515  | 0.000011  |
| C  | 2.191359  | 0.038301  | 0.000048  |
| C  | 1.490087  | -1.166027 | 0.000054  |
| N  | 0.150021  | -1.202059 | 0.000042  |
| H  | -0.304781 | 2.137035  | -0.000062 |
| H  | 3.278446  | 0.056387  | 0.000081  |
| H  | 2.005360  | -2.123675 | 0.000098  |
| Cl | -2.215295 | -0.022681 | -0.000068 |

-----  
Statistical Thermodynamic AnalysisTemperature= 298.150 Kelvin Pressure= 1.00000 Atm  
=====

SCF Energy= -721.691857790 Predicted Change= -1.936376D-07

MP2 Energy= -723.4563943229 MP2 Cor. Energy= -1.76453653

Zero-point correction (ZPE)= -723.8466 0.06733

Internal Energy (U)= -723.8413 0.07259

Enthalpy (H)= -723.8404 0.07354

Gibbs Free Energy (G)= -723.8763 0.03764  
-----

Frequencies -- 171.8386 306.4915 423.2542



Supporting Information: **2radicalpyrazine.out**

-----  
 Using Gaussian 03: IA32L-G03RevC.02 12-Jun-2004  
 =====

```
# g3b3 scf=(maxcycle=1000)
#N Geom=AllCheck Guess=Read SCRF=Check B3LYP/6-31G(d) Freq
#N Geom=AllCheck Guess=Read SCRF=Check QCISD(T,E4T)/6-31G(d)
#N Geom=AllCheck Guess=Read SCRF=Check MP4/6-31+G(d)
#N Geom=AllCheck Guess=Read SCRF=Check MP4/6-31G(2df,p)
#N Geom=AllCheck Guess=Read SCRF=Check MP2=Full/GTLarge
```

-----  
 Pointgroup= C1 Stoichiometry= C4H3N2(2) C1[X(C4H3N2)] #Atoms= 9  
 Charge = 0 Multiplicity = 2  
 -----

```
SCF Energy= -262.112681481 Predicted Change= -7.204525D-07
MP2 Energy= -263.3426337473 Correl. Energy= -1.22995226
=====
```

```
Optimization completed.      {Found      2      times}
Item  Max Val.  Criteria  Pass?  RMS Val.  Criteria  Pass?
Force  0.00038 || 0.00045 [ YES ]  0.00009 || 0.00030 [ YES ]
Displ  0.00116 || 0.00180 [ YES ]  0.00116 || 0.00180 [ YES ]
-----
```

| Atomic<br>Type | Coordinates (Angstroms) |   |   |
|----------------|-------------------------|---|---|
|                | X                       | Y | Z |

|   |           |           |           |
|---|-----------|-----------|-----------|
| C | -0.369918 | -1.316753 | -0.000036 |
| C | -1.344896 | -0.311229 | -0.000062 |
| N | -0.954715 | 0.968218  | -0.000022 |
| C | 0.362694  | 1.216058  | 0.000037  |
| C | 1.311843  | 0.194854  | 0.000062  |
| N | 0.898104  | -1.087157 | 0.000017  |
| H | -2.410605 | -0.517485 | -0.000063 |
| H | 0.667900  | 2.260003  | 0.000032  |
| H | 2.380645  | 0.392472  | 0.000062  |

## Statistical Thermodynamic Analysis

Temperature= 298.150 Kelvin Pressure= 1.00000 Atm  
 =====

```
SCF Energy= -262.112681481 Predicted Change= -7.204525D-07
MP2 Energy= -263.3426337473 MP2 Cor. Energy= -1.22995226
Zero-point correction (ZPE)= -263.5740 0.06411
Internal Energy (U)= -263.5699 0.06827
Enthalpy (H)= -263.5689 0.06921
Gibbs Free Energy (G)= -263.6019 0.03619
-----
```

```
Frequencies -- 364.5275          433.1714          570.9275
```

**Chloropyrazoles**

Supporting Information: 3chloropyrazole.out

-----  
Using Gaussian 03: AM64L-G03RevC.02 12-Jun-2004  
=====

# g3b3

#N Geom=AllCheck Guess=Read SCRF=Check B3LYP/6-31G(d) Freq

#N Geom=AllCheck Guess=Read SCRF=Check QCISD(T,E4T)/6-31G(d)

#N Geom=AllCheck Guess=Read SCRF=Check MP4/6-31+G(d)

#N Geom=AllCheck Guess=Read SCRF=Check MP4/6-31G(2df,p)

#N Geom=AllCheck Guess=Read SCRF=Check MP2=Full/GTLarge  
-----

Pointgroup= C1 Stoichiometry= C3H3ClN2 C1[X(C3H3ClN2)] #Atoms= 9

Charge = 0 Multiplicity = 1  
-----

SCF Energy= -683.796104029 Predicted Change= -1.235731D-06

MP2 Energy= -685.3829639388 Correl. Energy= -1.58685991  
=====

Optimization completed. {Found 2 times}

Item Max Val. Criteria Pass? RMS Val. Criteria Pass?

Force 0.00030 || 0.00045 [ YES ] 0.00012 || 0.00030 [ YES ]

Displ 0.00161 || 0.00180 [ YES ] 0.00161 || 0.00180 [ YES ]  
-----

Atomic Coordinates (Angstroms)

Type X Y Z  
-----

C 1.853146 0.650341 0.000047

C 0.571595 1.164890 0.000041

C -0.249719 0.014971 0.000013

N 1.722541 -0.701450 -0.000012

H 2.453971 -1.396672 -0.000133

H 2.820903 1.131435 0.000107

H 0.265720 2.199483 0.000085

Cl -1.983184 -0.009995 0.000003

N 0.437945 -1.119341 -0.000090  
-----

Statistical Thermodynamic Analysis

Temperature= 298.150 Kelvin Pressure= 1.00000 Atm  
=====

SCF Energy= -683.796104029 Predicted Change= -1.235731D-06

MP2 Energy= -685.3829639388 MP2 Cor. Energy= -1.58685991

Zero-point correction (ZPE)= -685.7300 0.06193

Internal Energy (U)= -685.7252 0.06672

Enthalpy (H)= -685.7243 0.06766

Gibbs Free Energy (G)= -685.7587 0.03324  
-----

Frequencies -- 254.6736 317.2278 481.5302

Supporting Information: **3radicalpyrazole.out**

-----  
 Using Gaussian 03: AM64L-G03RevC.02 12-Jun-2004  
 =====

# g3b3

#N Geom=AllCheck Guess=Read SCRF=Check B3LYP/6-31G(d) Freq

#N Geom=AllCheck Guess=Read SCRF=Check QCISD(T,E4T)/6-31G(d)

#N Geom=AllCheck Guess=Read SCRF=Check MP4/6-31+G(d)

#N Geom=AllCheck Guess=Read SCRF=Check MP4/6-31G(2df,p)

#N Geom=AllCheck Guess=Read SCRF=Check MP2=Full/GTLarge  
 -----

Pointgroup= C1 Stoichiometry= C3H3N2(2) C1[X(C3H3N2)] #Atoms= 8

Charge = 0 Multiplicity = 2  
 -----

SCF Energy= -224.213405407 Predicted Change= -8.606087D-08

MP2 Energy= -225.254566439 Correl. Energy= -1.04116103  
 =====

Optimization completed. {Found 2 times}

| Item  | Max Val. | Criteria | Pass?   | RMS Val. | Criteria | Pass?   |
|-------|----------|----------|---------|----------|----------|---------|
| Force | 0.00010  | 0.00045  | [ YES ] | 0.00004  | 0.00030  | [ YES ] |
| Displ | 0.00042  | 0.00180  | [ YES ] | 0.00042  | 0.00180  | [ YES ] |

-----

| Atomic Type | Coordinates (Angstroms) |           |           |  |
|-------------|-------------------------|-----------|-----------|--|
|             | X                       | Y         | Z         |  |
| C           | -0.538165               | 0.954401  | 0.000079  |  |
| C           | -1.204299               | -0.261355 | 0.000019  |  |
| C           | -0.140731               | -1.188650 | 0.000066  |  |
| N           | 0.794263                | 0.678631  | -0.000055 |  |
| H           | 1.567711                | 1.327097  | -0.000147 |  |
| H           | -0.906770               | 1.971389  | 0.000136  |  |
| H           | -2.268536               | -0.437118 | 0.000050  |  |
| N           | 1.049562                | -0.662594 | -0.000091 |  |

-----

## Statistical Thermodynamic Analysis

Temperature= 298.150 Kelvin Pressure= 1.00000 Atm  
 =====

SCF Energy= -224.213405407 Predicted Change= -8.606087D-08

MP2 Energy= -225.254566439 MP2 Cor. Energy= -1.04116103

Zero-point correction (ZPE)= -225.4449 0.05828

Internal Energy (U)= -225.4411 0.06208

Enthalpy (H)= -225.4401 0.06303

Gibbs Free Energy (G)= -225.4718 0.03139  
 -----

Frequencies -- 424.3146 599.7774 651.6563

Supporting Information: **4chloropyrazole.out**

-----  
 Using Gaussian 03: AM64L-G03RevC.02 12-Jun-2004  
 =====

# g3b3

#N Geom=AllCheck Guess=Read SCRF=Check B3LYP/6-31G(d) Freq

#N Geom=AllCheck Guess=Read SCRF=Check QCISD(T,E4T)/6-31G(d)

#N Geom=AllCheck Guess=Read SCRF=Check MP4/6-31+G(d)

#N Geom=AllCheck Guess=Read SCRF=Check MP4/6-31G(2df,p)

#N Geom=AllCheck Guess=Read SCRF=Check MP2=Full/GTLarge  
 -----

Pointgroup= C1 Stoichiometry= C3H3ClN2 C1[X(C3H3ClN2)] #Atoms= 9

Charge = 0 Multiplicity = 1  
 -----

SCF Energy= -683.792850662 Predicted Change= -9.154105D-08

MP2 Energy= -685.379990396 Correl. Energy= -1.58713973  
 =====

Optimization completed. {Found 2 times}

| Item  | Max Val. | Criteria | Pass?   | RMS Val. | Criteria | Pass?   |
|-------|----------|----------|---------|----------|----------|---------|
| Force | 0.00008  | 0.00045  | [ YES ] | 0.00003  | 0.00030  | [ YES ] |
| Displ | 0.00126  | 0.00180  | [ YES ] | 0.00126  | 0.00180  | [ YES ] |

-----

| Atomic Type | Coordinates (Angstroms) |           |           |  |
|-------------|-------------------------|-----------|-----------|--|
|             | X                       | Y         | Z         |  |
| C           | 0.559978                | -1.100793 | 0.000066  |  |
| C           | -0.276469               | -0.001289 | -0.000017 |  |
| C           | 0.573503                | 1.126459  | 0.000094  |  |
| N           | 1.817484                | -0.588829 | 0.000092  |  |
| H           | 2.688945                | -1.097518 | 0.000191  |  |
| H           | 0.354266                | -2.160625 | 0.000063  |  |
| N           | 1.853602                | 0.759873  | 0.000007  |  |
| H           | 0.299430                | 2.172273  | 0.000110  |  |
| Cl          | -2.010724               | -0.015159 | -0.000113 |  |

-----

## Statistical Thermodynamic Analysis

Temperature= 298.150 Kelvin Pressure= 1.00000 Atm  
 =====

SCF Energy= -683.792850662 Predicted Change= -9.154105D-08

MP2 Energy= -685.379990396 MP2 Cor. Energy= -1.58713973

Zero-point correction (ZPE)= -685.7276 0.06209

Internal Energy (U)= -685.7228 0.06690

Enthalpy (H)= -685.7219 0.06784

Gibbs Free Energy (G)= -685.7564 0.03332  
 -----

Frequencies -- 249.3792 292.2446 480.3855

Supporting Information: **4radicalpyrazole.out**

-----  
 Using Gaussian 03: AM64L-G03RevC.02 12-Jun-2004  
 =====

# g3b3

#N Geom=AllCheck Guess=Read SCRF=Check B3LYP/6-31G(d) Freq

#N Geom=AllCheck Guess=Read SCRF=Check QCISD(T,E4T)/6-31G(d)

#N Geom=AllCheck Guess=Read SCRF=Check MP4/6-31+G(d)

#N Geom=AllCheck Guess=Read SCRF=Check MP4/6-31G(2df,p)

#N Geom=AllCheck Guess=Read SCRF=Check MP2=Full/GTLarge  
 -----

Pointgroup= C1 Stoichiometry= C3H3N2(2) C1[X(C3H3N2)] #Atoms= 8

Charge = 0 Multiplicity = 2  
 -----

SCF Energy= -224.208357482 Predicted Change= -4.293281D-07

MP2 Energy= -225.2449907232 Correl. Energy= -1.03663324  
 =====

Optimization completed. {Found 2 times}

| Item  | Max Val. | Criteria | Pass?   | RMS Val. | Criteria | Pass?   |
|-------|----------|----------|---------|----------|----------|---------|
| Force | 0.00023  | 0.00045  | [ YES ] | 0.00008  | 0.00030  | [ YES ] |
| Displ | 0.00115  | 0.00180  | [ YES ] | 0.00115  | 0.00180  | [ YES ] |

-----

| Atomic Type | Coordinates (Angstroms) |           |           |
|-------------|-------------------------|-----------|-----------|
|             | X                       | Y         | Z         |
| C           | -1.053073               | -0.556141 | 0.000001  |
| C           | 0.146882                | -1.228103 | 0.000054  |
| C           | 1.170527                | -0.269441 | 0.000191  |
| N           | -0.700602               | 0.760132  | 0.000093  |
| H           | -1.304715               | 1.568990  | 0.000140  |
| H           | -2.081051               | -0.885996 | 0.000022  |
| N           | 0.637181                | 0.958976  | -0.000348 |
| H           | 2.243706                | -0.394638 | 0.000149  |

-----

## Statistical Thermodynamic Analysis

Temperature= 298.150 Kelvin Pressure= 1.00000 Atm  
 =====

SCF Energy= -224.208357482 Predicted Change= -4.293281D-07

MP2 Energy= -225.2449907232 MP2 Cor. Energy= -1.03663324

Zero-point correction (ZPE)= -225.4399 0.05875

Internal Energy (U)= -225.4361 0.06249

Enthalpy (H)= -225.4352 0.06344

Gibbs Free Energy (G)= -225.4667 0.03191  
 -----

Frequencies -- 476.3810 564.2043 686.9909

Supporting Information: **Schlörpyrazole.out**

-----  
 Using Gaussian 03: AM64L-G03RevC.02 12-Jun-2004  
 =====

# g3b3

#N Geom=AllCheck Guess=Read SCRF=Check B3LYP/6-31G(d) Freq

#N Geom=AllCheck Guess=Read SCRF=Check QCISD(T,E4T)/6-31G(d)

#N Geom=AllCheck Guess=Read SCRF=Check MP4/6-31+G(d)

#N Geom=AllCheck Guess=Read SCRF=Check MP4/6-31G(2df,p)

#N Geom=AllCheck Guess=Read SCRF=Check MP2=Full/GTLarge  
 -----

Pointgroup= C1 Stoichiometry= C3H3ClN2 C1[X(C3H3ClN2)] #Atoms= 9

Charge = 0 Multiplicity = 1  
 -----

SCF Energy= -683.793526860 Predicted Change= -1.090175D-07

MP2 Energy= -685.3810646405 Correl. Energy= -1.58753778  
 =====

Optimization completed. {Found 2 times}

| Item  | Max Val. | Criteria | Pass?   | RMS Val. | Criteria | Pass?   |
|-------|----------|----------|---------|----------|----------|---------|
| Force | 0.00009  | 0.00045  | [ YES ] | 0.00002  | 0.00030  | [ YES ] |
| Displ | 0.00130  | 0.00180  | [ YES ] | 0.00130  | 0.00180  | [ YES ] |

-----

| Atomic Type | Coordinates (Angstroms) |           |           |
|-------------|-------------------------|-----------|-----------|
|             | X                       | Y         | Z         |
| C           | -0.244824               | 0.093077  | -0.000002 |
| C           | 0.618047                | 1.169414  | -0.000069 |
| C           | 1.897782                | 0.568551  | 0.000059  |
| N           | 0.513090                | -1.032602 | 0.000054  |
| H           | 0.192237                | -1.989766 | 0.000162  |
| H           | 0.356737                | 2.216445  | -0.000142 |
| N           | 1.837228                | -0.762888 | 0.000006  |
| H           | 2.863439                | 1.056888  | 0.000087  |
| Cl          | -1.970039               | 0.017566  | -0.000027 |

-----

## Statistical Thermodynamic Analysis

Temperature= 298.150 Kelvin Pressure= 1.00000 Atm  
 =====

SCF Energy= -683.793526860 Predicted Change= -1.090175D-07

MP2 Energy= -685.3810646405 MP2 Cor. Energy= -1.58753778

Zero-point correction (ZPE)= -685.7279 0.06198

Internal Energy (U)= -685.7231 0.06680

Enthalpy (H)= -685.7221 0.06774

Gibbs Free Energy (G)= -685.7567 0.03322  
 -----

Frequencies -- 236.7237 298.7106 473.9444

Supporting Information: **5radicalpyrazole.out**

-----  
 Using Gaussian 03: AM64L-G03RevC.02 12-Jun-2004  
 =====

# g3b3

#N Geom=AllCheck Guess=Read SCRF=Check B3LYP/6-31G(d) Freq

#N Geom=AllCheck Guess=Read SCRF=Check QCISD(T,E4T)/6-31G(d)

#N Geom=AllCheck Guess=Read SCRF=Check MP4/6-31+G(d)

#N Geom=AllCheck Guess=Read SCRF=Check MP4/6-31G(2df,p)

#N Geom=AllCheck Guess=Read SCRF=Check MP2=Full/GTLarge  
 -----

Pointgroup= C1 Stoichiometry= C3H3N2(2) C1[X(C3H3N2)] #Atoms= 8

Charge = 0 Multiplicity = 2  
 -----

SCF Energy= -224.209750452 Predicted Change= -1.422639D-07

MP2 Energy= -225.2489081172 Correl. Energy= -1.03915766  
 =====

Optimization completed. {Found 2 times}

| Item  | Max Val. | Criteria | Pass?   | RMS Val. | Criteria | Pass?   |
|-------|----------|----------|---------|----------|----------|---------|
| Force | 0.00011  | 0.00045  | [ YES ] | 0.00004  | 0.00030  | [ YES ] |
| Displ | 0.00072  | 0.00180  | [ YES ] | 0.00072  | 0.00180  | [ YES ] |

-----

| Atomic Type | Coordinates (Angstroms) |           |           |  |
|-------------|-------------------------|-----------|-----------|--|
|             | X                       | Y         | Z         |  |
| C           | -0.079121               | -1.184030 | 0.000174  |  |
| C           | 1.123996                | -0.515213 | 0.000033  |  |
| C           | 0.712377                | 0.840620  | 0.000160  |  |
| N           | -1.087192               | -0.296976 | 0.000056  |  |
| H           | -2.081695               | -0.461044 | 0.000056  |  |
| H           | 2.121341                | -0.925911 | 0.000099  |  |
| N           | -0.615474               | 0.984484  | -0.000423 |  |
| H           | 1.335503                | 1.726139  | 0.000213  |  |

-----

## Statistical Thermodynamic Analysis

Temperature= 298.150 Kelvin Pressure= 1.00000 Atm  
 =====

SCF Energy= -224.209750452 Predicted Change= -1.422639D-07

MP2 Energy= -225.2489081172 MP2 Cor. Energy= -1.03915766

Zero-point correction (ZPE)= -225.4416 0.05843

Internal Energy (U)= -225.4378 0.06223

Enthalpy (H)= -225.4369 0.06318

Gibbs Free Energy (G)= -225.4685 0.03153  
 -----

Frequencies -- 408.0836 572.3938 674.8813

**Chlorpyridazines**Supporting Information: **3chloropyridazine.out**-----  
Using Gaussian 03: AM64L-G03RevC.02 12-Jun-2004  
=====

# g3b3

#N Geom=AllCheck Guess=Read SCRF=Check B3LYP/6-31G(d) Freq

#N Geom=AllCheck Guess=Read SCRF=Check QCISD(T,E4T)/6-31G(d)

#N Geom=AllCheck Guess=Read SCRF=Check MP4/6-31+G(d)

#N Geom=AllCheck Guess=Read SCRF=Check MP4/6-31G(2df,p)

#N Geom=AllCheck Guess=Read SCRF=Check MP2=Full/GTLarge  
-----

Pointgroup= C1 Stoichiometry= C4H3ClN2 C1[X(C4H3ClN2)] #Atoms= 10

Charge = 0 Multiplicity = 1  
-----

SCF Energy= -721.657259938 Predicted Change= -7.062171D-08

MP2 Energy= -723.424972686 Correl. Energy= -1.76771274  
=====

Optimization completed. {Found 2 times}

Item Max Val. Criteria Pass? RMS Val. Criteria Pass?

Force 0.00015 || 0.00045 [ YES ] 0.00003 || 0.00030 [ YES ]

Displ 0.00056 || 0.00180 [ YES ] 0.00056 || 0.00180 [ YES ]  
-----

Atomic Coordinates (Angstroms)

Type X Y Z  
-----

N 1.461187 -1.262737 -0.000004

C 2.175327 -0.136941 -0.000001

C 1.604469 1.142286 0.000003

C 0.224982 1.220754 0.000003

C -0.456724 -0.003385 0.000000

N 0.124258 -1.193068 -0.000003

H 2.225512 2.033016 0.000006

H 3.252871 -0.277316 0.000000

H -0.312684 2.162352 0.000006

Cl -2.208949 -0.003747 0.000000  
-----

Statistical Thermodynamic Analysis

Temperature= 298.150 Kelvin Pressure= 1.00000 Atm  
=====

SCF Energy= -721.657259938 Predicted Change= -7.062171D-08

MP2 Energy= -723.424972686 MP2 Cor. Energy= -1.76771274

Zero-point correction (ZPE)= -723.8160 0.06658

Internal Energy (U)= -723.8107 0.07190

Enthalpy (H)= -723.8098 0.07284

Gibbs Free Energy (G)= -723.8458 0.03687  
-----

Frequencies -- 178.1647 310.5459 383.5200



Supporting Information: **4chloropyridazine.out**

-----  
 Using Gaussian 03: AM64L-G03RevC.02 12-Jun-2004  
 =====

# g3b3

#N Geom=AllCheck Guess=Read SCRF=Check B3LYP/6-31G(d) Freq

#N Geom=AllCheck Guess=Read SCRF=Check QCISD(T,E4T)/6-31G(d)

#N Geom=AllCheck Guess=Read SCRF=Check MP4/6-31+G(d)

#N Geom=AllCheck Guess=Read SCRF=Check MP4/6-31G(2df,p)

#N Geom=AllCheck Guess=Read SCRF=Check MP2=Full/GTLarge  
 -----

Pointgroup= C1 Stoichiometry= C4H3ClN2 C1[X(C4H3ClN2)] #Atoms= 10

Charge = 0 Multiplicity = 1  
 -----

SCF Energy= -721.656165625 Predicted Change= -7.747159D-08

MP2 Energy= -723.4239366652 Correl. Energy= -1.76777104  
 =====

Optimization completed. {Found 2 times}

| Item  | Max Val. | Criteria | Pass?   | RMS Val. | Criteria | Pass?   |
|-------|----------|----------|---------|----------|----------|---------|
| Force | 0.00017  | 0.00045  | [ YES ] | 0.00003  | 0.00030  | [ YES ] |
| Displ | 0.00052  | 0.00180  | [ YES ] | 0.00052  | 0.00180  | [ YES ] |

-----

| Atomic Type | Coordinates (Angstroms) |   |   |
|-------------|-------------------------|---|---|
|             | X                       | Y | Z |

-----

|    |           |           |           |
|----|-----------|-----------|-----------|
| N  | -1.563762 | -1.214018 | -0.000002 |
| C  | -0.230386 | -1.173927 | -0.000003 |
| C  | 0.490581  | 0.026011  | 0.000000  |
| C  | -0.223696 | 1.209443  | 0.000003  |
| C  | -1.617624 | 1.086111  | 0.000003  |
| N  | -2.267661 | -0.080005 | 0.000000  |
| H  | 0.276278  | -2.134877 | -0.000005 |
| H  | 0.263449  | 2.178553  | 0.000005  |
| H  | -2.251657 | 1.969263  | 0.000005  |
| Cl | 2.236390  | 0.009376  | 0.000000  |

-----

## Statistical Thermodynamic Analysis

Temperature= 298.150 Kelvin Pressure= 1.00000 Atm  
 =====

SCF Energy= -721.656165625 Predicted Change= -7.747159D-08

MP2 Energy= -723.4239366652 MP2 Cor. Energy= -1.76777104

Zero-point correction (ZPE)= -723.8150 0.06675

Internal Energy (U)= -723.8097 0.07207

Enthalpy (H)= -723.8088 0.07301

Gibbs Free Energy (G)= -723.8448 0.03700  
 -----

Frequencies -- 181.1366 291.2619 388.9733

**Chloropyridines**

Supporting Information: 23dichloropyridine.out

-----  
Using Gaussian 03: IA32L-G03RevC.02 12-Jun-2004  
=====

```
#g3b3 scf=(restart,maxcyc=1000)
#N Geom=AllCheck Guess=Read SCRF=Check B3LYP/6-31G(d) Freq
#N Geom=AllCheck Guess=Read SCRF=Check QCISD(T,E4T)/6-31G(d)
#N Geom=AllCheck Guess=Read SCRF=Check MP4/6-31+G(d)
#N Geom=AllCheck Guess=Read SCRF=Check MP4/6-31G(2df,p)
#N Geom=AllCheck Guess=Read SCRF=Check MP2=Full/GTLarge
```

```
Pointgroup= C1  Stoichiometry= C5H3Cl2N  C1[X(C5H3Cl2N)] #Atoms= 11
Charge = 0  Multiplicity = 1
```

```
SCF Energy= -1164.62403295  Predicted Change= -4.042971D-07
MP2 Energy= -1166.844069177  Correl. Energy= -2.22003622
```

```
=====
Optimization completed.      {Found      2      times}
Item  Max Val.  Criteria  Pass?  RMS Val.  Criteria  Pass?
Force  0.00028 || 0.00045 [ YES ]  0.00006 || 0.00030 [ YES ]
Displ  0.00090 || 0.00180 [ YES ]  0.00090 || 0.00180 [ YES ]
```

```
-----
Atomic      Coordinates (Angstroms)
Type       X          Y          Z
```

```
-----
C          0.011953  -0.702001  -0.000067
C          -0.022909  0.703617  0.000027
C          1.191838  1.386592  0.000241
C          2.379571  0.657487  0.000364
C          2.299524  -0.732526  0.000285
N          1.136139  -1.394198  0.000069
H          1.194984  2.471539  0.000308
H          3.341448  1.160009  0.000523
H          3.195283  -1.348790  0.000365
Cl         -1.475731  -1.628194  -0.000286
Cl         -1.515125  1.604524  -0.000113
```

## Statistical Thermodynamic Analysis

```
Temperature= 298.150 Kelvin  Pressure= 1.00000 Atm
```

```
=====
SCF Energy=  -1164.62403295 Predicted Change= -4.042971D-07
MP2 Energy=  -1166.844069177   MP2 Cor. Energy= -2.22003622
Zero-point correction (ZPE)=      -1167.4031  0.06970
Internal Energy (U)=                -1167.3966  0.07621
Enthalpy (H)=                       -1167.3956  0.07716
Gibbs Free Energy (G)=               -1167.4349  0.03784
```

```
-----
Frequencies -- 124.0849          201.8844          248.5363
```

Supporting Information: **24dichloropyridine.out**

Using Gaussian 03: IA32L-G03RevC.02 12-Jun-2004

```
=====
#g3b3 scf=(restart,maxcyc=1000)
#N Geom=AllCheck Guess=Read SCRF=Check B3LYP/6-31G(d) Freq
#N Geom=AllCheck Guess=Read SCRF=Check QCISD(T,E4T)/6-31G(d)
#N Geom=AllCheck Guess=Read SCRF=Check MP4/6-31+G(d)
#N Geom=AllCheck Guess=Read SCRF=Check MP4/6-31G(2df,p)
#N Geom=AllCheck Guess=Read SCRF=Check MP2=Full/GTLarge

Pointgroup= C1  Stoichiometry= C5H3Cl2N  C1[X(C5H3Cl2N)] #Atoms= 11
Charge = 0  Multiplicity = 1
=====
```

```
SCF Energy= -1164.62995437  Predicted Change= -2.009001D-07
MP2 Energy= -1166.84697145  Correl. Energy= -2.21701707
=====
```

```
Optimization completed.      {Found 2 times}
Item  Max Val.  Criteria  Pass?  RMS Val.  Criteria  Pass?
Force  0.00010 || 0.00045 [ YES ]  0.00003 || 0.00030 [ YES ]
Displ  0.00111 || 0.00180 [ YES ]  0.00111 || 0.00180 [ YES ]
=====
```

```
Atomic      Coordinates (Angstroms)
Type       X         Y         Z
=====
```

```
 C    1.178687   0.025308  -0.000113
 C   -0.002263  -0.723339  -0.000056
 C   -1.191814  -0.002337   0.000147
 C   -1.167679   1.392715   0.000264
 C    0.080907   2.009404   0.000145
 N    1.245036   1.344086  -0.000030
 H    0.012189  -1.805622  -0.000158
 H   -2.082683   1.973221   0.000433
 H    0.154920   3.094432   0.000247
 Cl   2.707991  -0.845586  -0.000416
 Cl  -2.718974  -0.853305   0.000261
=====
```

## Statistical Thermodynamic Analysis

Temperature= 298.150 Kelvin Pressure= 1.00000 Atm

```
=====
SCF Energy=  -1164.62995437 Predicted Change= -2.009001D-07
MP2 Energy=  -1166.84697145 MP2 Cor. Energy= -2.21701707
Zero-point correction (ZPE)=    -1167.4075  0.06969
Internal Energy (U)=              -1167.4010  0.07621
Enthalpy (H)=                      -1167.4000  0.07715
Gibbs Free Energy (G)=              -1167.4394  0.03773
=====
```

```
Frequencies -- 159.7764          202.4522          203.7458
```

Supporting Information: **2chloro3radicalpyridine.out**

Using Gaussian 03: AM64L-G03RevC.02 12-Jun-2004

```

=====
# g3b3 scf=maxcyc=10000
#N Geom=AllCheck Guess=Read SCRF=Check B3LYP/6-31G(d) Freq
#N Geom=AllCheck Guess=Read SCRF=Check QCISD(T,E4T)/6-31G(d)
#N Geom=AllCheck Guess=Read SCRF=Check MP4/6-31+G(d)
#N Geom=AllCheck Guess=Read SCRF=Check MP4/6-31G(2df,p)
#N Geom=AllCheck Guess=Read SCRF=Check MP2=Full/GTLarge

Pointgroup= C1  Stoichiometry= C5H3ClN(2)  C1[X(C5H3ClN)] #Atoms= 10
Charge = 0  Multiplicity = 2

```

```

=====
SCF Energy= -705.057356241  Predicted Change= -6.811516D-07
MP2 Energy= -706.6911714717  Correl. Energy= -1.63381523
=====

```

```

Optimization completed.      {Found      2      times}
Item  Max Val.  Criteria  Pass?  RMS Val.  Criteria  Pass?
Force  0.00044 || 0.00045 [ YES ]   0.00009 || 0.00030 [ YES ]
Displ  0.00118 || 0.00180 [ YES ]   0.00118 || 0.00180 [ YES ]

```

```

-----
Atomic      Coordinates (Angstroms)
Type       X          Y          Z

```

```

-----
C  -0.497680   0.025523   0.000069
C  0.226377   1.199125   0.000050
C  1.600345   1.216993   0.000219
C  2.243448  -0.032494   0.000347
C  1.448286  -1.178160   0.000249
N  0.107948  -1.154404   0.000097
H  2.166716   2.144832   0.000256
H  3.326961  -0.108382   0.000491
H  1.899552  -2.167606   0.000319
Cl -2.251383   0.048592  -0.000432

```

## Statistical Thermodynamic Analysis

```

Temperature= 298.150 Kelvin  Pressure= 1.00000 Atm

```

```

=====
SCF Energy=  -705.057356241 Predicted Change= -6.811516D-07
MP2 Energy=  -706.6911714717  MP2 Cor. Energy= -1.63381523
Zero-point correction (ZPE)=      -707.1269  0.06637
Internal Energy (U)=                -707.1216  0.07171
Enthalpy (H)=                       -707.1206  0.07265
Gibbs Free Energy (G)=               -707.1572  0.03604

```

```

-----
Frequencies -- 179.7700          299.2747          418.8874

```

Supporting Information: **2chloro4radicalpyridine.out**

Using Gaussian 03: IA32L-G03RevC.02 12-Jun-2004

```
=====
# g3b3 scf=maxcyc=1000
#N Geom=AllCheck Guess=Read SCRF=Check B3LYP/6-31G(d) Freq
#N Geom=AllCheck Guess=Read SCRF=Check QCISD(T,E4T)/6-31G(d)
#N Geom=AllCheck Guess=Read SCRF=Check MP4/6-31+G(d)
#N Geom=AllCheck Guess=Read SCRF=Check MP4/6-31G(2df,p)
#N Geom=AllCheck Guess=Read SCRF=Check MP2=Full/GTLarge
=====
```

```
Pointgroup= C1  Stoichiometry= C5H3ClN(2)  C1[X(C5H3ClN)]  #Atoms= 10
Charge = 0  Multiplicity = 2
=====
```

```
SCF Energy= -705.060084964  Predicted Change= -1.734965D-07
MP2 Energy= -706.6975548603  Correl. Energy= -1.63746989
=====
```

```
Optimization completed.      {Found      2      times}
Item  Max Val.  Criteria  Pass?  RMS Val.  Criteria  Pass?
Force  0.00021 || 0.00045 [ YES ]   0.00005 || 0.00030 [ YES ]
Displ  0.00075 || 0.00180 [ YES ]   0.00075 || 0.00180 [ YES ]
=====
```

```
Atomic      Coordinates (Angstroms)
Type        X          Y          Z
=====
```

```
  C    -0.434892    0.006563   -0.000097
  C     0.170357    1.278016    0.000014
  C     1.542200    1.242111    0.000224
  C     2.297625    0.090308    0.000340
  C     1.555714   -1.099999    0.000250
  N     0.217272   -1.140861    0.000030
  H    -0.420854    2.186937   -0.000069
  H     3.382696    0.077121    0.000503
  H     2.062820   -2.063437    0.000330
  Cl   -2.195976   -0.077446   -0.000315
=====
```

## Statistical Thermodynamic Analysis

```
Temperature= 298.150 Kelvin  Pressure= 1.00000 Atm
=====
```

```
SCF Energy=  -705.060084964 Predicted Change= -1.734965D-07
MP2 Energy=  -706.6975548603  MP2 Cor. Energy= -1.63746989
Zero-point correction (ZPE)=    -707.1298  0.06612
Internal Energy (U)=              -707.1244  0.07146
Enthalpy (H)=                      -707.1235  0.07240
Gibbs Free Energy (G)=              -707.1601  0.03581
=====
```

```
Frequencies -- 174.5523          315.2681          418.8293
=====
```

Supporting Information: **2chloro5radicalpyridine.out**

Using Gaussian 03: AM64L-G03RevC.02 12-Jun-2004

```
=====
# g3b3 scf=maxcyc=10000
#N Geom=AllCheck Guess=Read SCRF=Check B3LYP/6-31G(d) Freq
#N Geom=AllCheck Guess=Read SCRF=Check QCISD(T,E4T)/6-31G(d)
#N Geom=AllCheck Guess=Read SCRF=Check MP4/6-31+G(d)
#N Geom=AllCheck Guess=Read SCRF=Check MP4/6-31G(2df,p)
#N Geom=AllCheck Guess=Read SCRF=Check MP2=Full/GTLarge

Pointgroup= C1  Stoichiometry= C5H3ClN(2)  C1[X(C5H3ClN)]  #Atoms= 10
Charge = 0  Multiplicity = 2
=====
```

```
SCF Energy= -705.058103922  Predicted Change= -1.170657D-06
MP2 Energy= -706.6915384347  Correl. Energy= -1.63343451
=====
```

```
Optimization completed.      {Found      2      times}
Item  Max Val.  Criteria  Pass?  RMS Val.  Criteria  Pass?
Force  0.00042 || 0.00045 [ YES ]  0.00011 || 0.00030 [ YES ]
Displ  0.00136 || 0.00180 [ YES ]  0.00136 || 0.00180 [ YES ]
=====
```

```
Atomic      Coordinates (Angstroms)
Type        X          Y          Z
=====
```

```
  C    -0.406681   -0.013151   -0.000083
  C     0.260303    1.217799    0.000013
  C     1.659093    1.183706    0.000216
  C     2.245496   -0.064313    0.000329
  C     1.526386   -1.239707    0.000273
  N     0.177791   -1.197982    0.000042
  H     2.238218    2.103348    0.000283
  H    -0.291245    2.151824   -0.000078
  H     1.983928   -2.224804    0.000313
  Cl    -2.169590   -0.008853   -0.000311
=====
```

## Statistical Thermodynamic Analysis

Temperature= 298.150 Kelvin Pressure= 1.00000 Atm

```
=====
SCF Energy=  -705.058103922 Predicted Change= -1.170657D-06
MP2 Energy=  -706.6915384347  MP2 Cor. Energy= -1.63343451
Zero-point correction (ZPE)=      -707.1267  0.06633
Internal Energy (U)=                -707.1213  0.07167
Enthalpy (H)=                       -707.1204  0.07261
Gibbs Free Energy (G)=               -707.1570  0.03603
=====
```

```
Frequencies --  191.2371          310.7208          408.3554
=====
```

Supporting Information: **2chloropyridine.out**

-----  
 Using Gaussian 03: IA32L-G03RevC.02 12-Jun-2004  
 =====

# g3b3  
 #N Geom=AllCheck Guess=Read SCRF=Check B3LYP/6-31G(d) Freq  
 #N Geom=AllCheck Guess=Read SCRF=Check QCISD(T,E4T)/6-31G(d)  
 #N Geom=AllCheck Guess=Read SCRF=Check MP4/6-31+G(d)  
 #N Geom=AllCheck Guess=Read SCRF=Check MP4/6-31G(2df,p)  
 #N Geom=AllCheck Guess=Read SCRF=Check MP2=Full/GTLarge

-----  
 Pointgroup= C1 Stoichiometry= C5H4ClN C1[X(C5H4ClN)] #Atoms= 11  
 Charge = 0 Multiplicity = 1  
 -----

SCF Energy= -705.702196576 Predicted Change= -8.884996D-07  
 MP2 Energy= -707.4275142555 Correl. Energy= -1.72531767  
 =====

Optimization completed. {Found 2 times}  
 Item Max Val. Criteria Pass? RMS Val. Criteria Pass?  
 Force 0.00043 || 0.00045 [ YES ] 0.00009 || 0.00030 [ YES ]  
 Displ 0.00116 || 0.00180 [ YES ] 0.00116 || 0.00180 [ YES ]  
 -----

Atomic Coordinates (Angstroms)  
 Type X Y Z  
 -----

|    |           |           |           |
|----|-----------|-----------|-----------|
| C  | -0.469882 | -0.015670 | -0.000041 |
| C  | 0.197185  | 1.212709  | -0.000003 |
| C  | 1.589174  | 1.179347  | 0.000220  |
| C  | 2.240415  | -0.055755 | 0.000319  |
| C  | 1.460420  | -1.210271 | 0.000194  |
| N  | 0.119421  | -1.196715 | 0.000063  |
| H  | 2.154606  | 2.107117  | 0.000321  |
| H  | -0.355542 | 2.145012  | -0.000132 |
| H  | 3.323520  | -0.124223 | 0.000480  |
| H  | 1.922040  | -2.195485 | 0.000329  |
| Cl | -2.234379 | -0.012798 | -0.000328 |

## Statistical Thermodynamic Analysis

Temperature= 298.150 Kelvin Pressure= 1.00000 Atm  
 =====

SCF Energy= -705.702196576 Predicted Change= -8.884996D-07  
 MP2 Energy= -707.4275142555 MP2 Cor. Energy= -1.72531767  
 Zero-point correction (ZPE)= -707.8037 0.07936  
 Internal Energy (U)= -707.7984 0.08472  
 Enthalpy (H)= -707.7974 0.08567  
 Gibbs Free Energy (G)= -707.8334 0.04964  
 -----

Frequencies -- 177.5455 312.0598 420.4117

Supporting Information: **2radicalpyridine2.out**

-----  
 Using Gaussian 03: IA32L-G03RevC.02 12-Jun-2004  
 =====

```
# g3b3 scf=maxcycle=5000
#N Geom=AllCheck Guess=Read SCRF=Check B3LYP/6-31G(d) Freq
#N Geom=AllCheck Guess=Read SCRF=Check QCISD(T,E4T)/6-31G(d)
#N Geom=AllCheck Guess=Read SCRF=Check MP4/6-31+G(d)
#N Geom=AllCheck Guess=Read SCRF=Check MP4/6-31G(2df,p)
#N Geom=AllCheck Guess=Read SCRF=Check MP2=Full/GTLarge
```

-----  
 Pointgroup= C1 Stoichiometry= C5H4N(2) C1[X(C5H4N)] #Atoms= 10  
 Charge = 0 Multiplicity = 2  
 -----

```
SCF Energy= -246.133047246 Predicted Change= -1.601620D-06
MP2 Energy= -247.284809885 Correl. Energy= -1.15176263
=====
```

```
Optimization completed.      {Found 2 times}
Item  Max Val.  Criteria  Pass?  RMS Val.  Criteria  Pass?
Force  0.00043 || 0.00045 [ YES ]  0.00012 || 0.00030 [ YES ]
Displ  0.00164 || 0.00180 [ YES ]  0.00164 || 0.00180 [ YES ]
-----
```

```
Atomic      Coordinates (Angstroms)
Type        X          Y          Z
-----
```

```
N   -1.007294   -1.013574   -0.000032
C    0.234915   -1.357293   -0.000032
C    1.332838   -0.500419   -0.000032
C    1.027165    0.863029    0.000034
C   -0.313285    1.270691    0.000052
C   -1.312508    0.301454   -0.000019
H    1.825216    1.602245    0.000072
H    2.355661   -0.862052   -0.000032
H   -0.577275    2.323839    0.000119
H   -2.367292    0.566216    0.000040
-----
```

## Statistical Thermodynamic Analysis

Temperature= 298.150 Kelvin Pressure= 1.00000 Atm  
 =====

```
SCF Energy= -246.133047246 Predicted Change= -1.601620D-06
MP2 Energy= -247.284809885 MP2 Cor. Energy= -1.15176263
Zero-point correction (ZPE)= -247.5300 0.07608
Internal Energy (U)= -247.5257 0.08034
Enthalpy (H)= -247.5248 0.08129
Gibbs Free Energy (G)= -247.5580 0.04810
-----
```

```
Frequencies -- 387.4841          425.9593          574.5364
```



Supporting Information: **3chloro2radicalpyridine.out**

Using Gaussian 03: AM64L-G03RevC.02 12-Jun-2004

```

=====
# g3b3 scf=maxcyc=10000
#N Geom=AllCheck Guess=Read SCRF=Check B3LYP/6-31G(d) Freq
#N Geom=AllCheck Guess=Read SCRF=Check QCISD(T,E4T)/6-31G(d)
#N Geom=AllCheck Guess=Read SCRF=Check MP4/6-31+G(d)
#N Geom=AllCheck Guess=Read SCRF=Check MP4/6-31G(2df,p)
#N Geom=AllCheck Guess=Read SCRF=Check MP2=Full/GTLarge

Pointgroup= C1  Stoichiometry= C5H3ClN(2)  C1[X(C5H3ClN)] #Atoms= 10
Charge = 0  Multiplicity = 2

```

```

=====
SCF Energy= -705.059133507  Predicted Change= -6.870792D-08
MP2 Energy= -706.6979595387  Correl. Energy= -1.63882603
=====

```

```

Optimization completed.      {Found      2      times}
Item  Max Val.  Criteria  Pass?  RMS Val.  Criteria  Pass?
Force  0.00012 || 0.00045 [ YES ]  0.00003 || 0.00030 [ YES ]
Displ  0.00030 || 0.00180 [ YES ]  0.00030 || 0.00180 [ YES ]

```

```

-----
Atomic      Coordinates (Angstroms)
Type       X          Y          Z

```

```

-----
C      0.231904  -1.201464  -0.000125
C     -0.512174  -0.027411  -0.000048
C      0.206447   1.168201   0.000162
C      1.606317   1.113582   0.000284
C      2.239441  -0.125420   0.000193
N      1.514319  -1.263630  -0.000015
H     -0.316748   2.120287   0.000229
H      2.191675   2.027796   0.000448
H      3.321300  -0.223222   0.000278
Cl     -2.260475  -0.037905  -0.000214

```

## Statistical Thermodynamic Analysis

```

Temperature= 298.150 Kelvin  Pressure= 1.00000 Atm

```

```

=====
SCF Energy=  -705.059133507 Predicted Change= -6.870792D-08
MP2 Energy=  -706.6979595387  MP2 Cor. Energy= -1.63882603
Zero-point correction (ZPE)=  -707.1327  0.06656
Internal Energy (U)=  -707.1273  0.07192
Enthalpy (H)=  -707.1264  0.07286
Gibbs Free Energy (G)=  -707.1630  0.03621

```

```

-----
Frequencies --  186.7384          290.9025          423.6865

```

Supporting Information: **3radicalpyridine.out**

-----  
 Using Gaussian 03: IA32L-G03RevC.02 12-Jun-2004  
 =====

```
#g3b3 scf=maxcycle=2000
#N Geom=AllCheck Guess=Read SCRF=Check B3LYP/6-31G(d) Freq
#N Geom=AllCheck Guess=Read SCRF=Check QCISD(T,E4T)/6-31G(d)
#N Geom=AllCheck Guess=Read SCRF=Check MP4/6-31+G(d)
#N Geom=AllCheck Guess=Read SCRF=Check MP4/6-31G(2df,p)
#N Geom=AllCheck Guess=Read SCRF=Check MP2=Full/GTLarge
```

-----  
 Pointgroup= C1 Stoichiometry= C5H4N(2) C1[X(C5H4N)] #Atoms= 10  
 Charge = 0 Multiplicity = 2  
 -----

```
SCF Energy= -246.127995405 Predicted Change= -9.508303D-07
MP2 Energy= -247.2714976836 Correl. Energy= -1.14350227
=====
```

```
Optimization completed.      {Found      2      times}
Item  Max Val.  Criteria  Pass?  RMS Val.  Criteria  Pass?
Force  0.00044 || 0.00045 [ YES ]  0.00010 || 0.00030 [ YES ]
Displ  0.00072 || 0.00180 [ YES ]  0.00072 || 0.00180 [ YES ]
-----
```

```
Atomic      Coordinates (Angstroms)
Type        X          Y          Z
-----
```

|   |           |           |           |
|---|-----------|-----------|-----------|
| N | -1.175635 | 0.734542  | -0.000020 |
| C | -1.270836 | -0.609153 | -0.000020 |
| C | -0.124179 | -1.378937 | -0.000020 |
| C | 1.147419  | -0.851772 | 0.000020  |
| C | 1.234086  | 0.548136  | 0.000040  |
| C | 0.045370  | 1.281948  | -0.000003 |
| H | 2.039300  | -1.473602 | 0.000035  |
| H | -2.272049 | -1.032440 | -0.000083 |
| H | 2.196991  | 1.052760  | 0.000072  |
| H | 0.074048  | 2.370163  | 0.000011  |

## Statistical Thermodynamic Analysis

Temperature= 298.150 Kelvin Pressure= 1.00000 Atm  
 =====

```
SCF Energy= -246.127995405 Predicted Change= -9.508303D-07
MP2 Energy= -247.2714976836 MP2 Cor. Energy= -1.14350227
Zero-point correction (ZPE)= -247.5209 0.07596
Internal Energy (U)= -247.5166 0.08021
Enthalpy (H)= -247.5157 0.08116
Gibbs Free Energy (G)= -247.5489 0.04798
-----
```

```
Frequencies -- 391.0957          423.5493          577.5448
```

Supporting Information: **4chloro2radicalpyridine.out**

Using Gaussian 03: IA32L-G03RevC.02 12-Jun-2004

```

=====
# g3b3 scf=maxcyc=1000
#N Geom=AllCheck Guess=Read SCRF=Check B3LYP/6-31G(d) Freq
#N Geom=AllCheck Guess=Read SCRF=Check QCISD(T,E4T)/6-31G(d)
#N Geom=AllCheck Guess=Read SCRF=Check MP4/6-31+G(d)
#N Geom=AllCheck Guess=Read SCRF=Check MP4/6-31G(2df,p)
#N Geom=AllCheck Guess=Read SCRF=Check MP2=Full/GTLarge
=====

```

```

Pointgroup= C1  Stoichiometry= C5H3ClN(2)  C1[X(C5H3ClN)]  #Atoms= 10
Charge = 0  Multiplicity = 2
=====

```

```

SCF Energy= -705.061993900  Predicted Change= -8.889267D-08
MP2 Energy= -706.7026155491  Correl. Energy= -1.64062164
=====

```

```

Optimization completed.      {Found      2      times}
Item  Max Val.  Criteria  Pass?  RMS Val.  Criteria  Pass?
Force  0.00009 || 0.00045 [ YES ]   0.00002 || 0.00030 [ YES ]
Displ  0.00075 || 0.00180 [ YES ]   0.00075 || 0.00180 [ YES ]
=====

```

```

Atomic      Coordinates (Angstroms)
Type        X          Y          Z
=====

```

```

C      1.565707   1.211922   0.000248
C      0.175719   1.273705   0.000186
C     -0.453388   0.028527  -0.000021
C      0.299220  -1.153429  -0.000136
C      1.685927  -1.047427  -0.000032
N      2.300284   0.154573   0.000151
H     -0.382737   2.202269   0.000274
H     -0.187257  -2.122002  -0.000302
H      2.319276  -1.930871  -0.000127
Cl     -2.205316  -0.065365  -0.000139
=====

```

## Statistical Thermodynamic Analysis

```

Temperature= 298.150 Kelvin  Pressure= 1.00000 Atm
=====

```

```

SCF Energy=  -705.061993900 Predicted Change= -8.889267D-08
MP2 Energy=  -706.7026155491  MP2 Cor. Energy= -1.64062164
Zero-point correction (ZPE)=      -707.1348  0.06653
Internal Energy (U)=                -707.1295  0.07189
Enthalpy (H)=                       -707.1285  0.07283
Gibbs Free Energy (G)=               -707.1652  0.03620
=====

```

```

Frequencies --  186.0137          301.6287          401.2603
=====

```

Supporting Information: **4chloropyridine.out**

-----  
 Using Gaussian 03: AM64L-G03RevC.02 12-Jun-2004  
 =====

# g3b3  
 #N Geom=AllCheck Guess=Read SCRF=Check B3LYP/6-31G(d) Freq  
 #N Geom=AllCheck Guess=Read SCRF=Check QCISD(T,E4T)/6-31G(d)  
 #N Geom=AllCheck Guess=Read SCRF=Check MP4/6-31+G(d)  
 #N Geom=AllCheck Guess=Read SCRF=Check MP4/6-31G(2df,p)  
 #N Geom=AllCheck Guess=Read SCRF=Check MP2=Full/GTLarge

-----  
 Pointgroup= C1 Stoichiometry= C5H4ClN C1[X(C5H4ClN)] #Atoms= 11  
 Charge = 0 Multiplicity = 1  
 -----

SCF Energy= -705.700122575 Predicted Change= -8.246239D-07  
 MP2 Energy= -707.4253125748 Correl. Energy= -1.72519  
 =====

Optimization completed. {Found 2 times}  
 Item Max Val. Criteria Pass? RMS Val. Criteria Pass?  
 Force 0.00031 || 0.00045 [ YES ] 0.00009 || 0.00030 [ YES ]  
 Displ 0.00169 || 0.00180 [ YES ] 0.00169 || 0.00180 [ YES ]  
 -----

| Atomic<br>Type | Coordinates (Angstroms) |   |   |
|----------------|-------------------------|---|---|
|                | X                       | Y | Z |

|    |           |           |           |
|----|-----------|-----------|-----------|
| C  | 1.593546  | -1.140396 | 0.000004  |
| C  | 0.199016  | -1.204472 | -0.000001 |
| C  | -0.499760 | 0.000014  | -0.000039 |
| C  | 0.199028  | 1.204485  | -0.000005 |
| C  | 1.593559  | 1.140383  | 0.000021  |
| N  | 2.294355  | -0.000011 | -0.000006 |
| H  | 2.174603  | -2.060773 | 0.000028  |
| H  | -0.318915 | -2.157024 | 0.000008  |
| H  | -0.318850 | 2.157064  | -0.000010 |
| H  | 2.174633  | 2.060747  | 0.000004  |
| Cl | -2.252017 | -0.000001 | 0.000008  |

## Statistical Thermodynamic Analysis

Temperature= 298.150 Kelvin Pressure= 1.00000 Atm  
 =====

SCF Energy= -705.700122575 Predicted Change= -8.246239D-07  
 MP2 Energy= -707.4253125748 MP2 Cor. Energy= -1.72519  
 Zero-point correction (ZPE)= -707.8012 0.07946  
 Internal Energy (U)= -707.7958 0.08483  
 Enthalpy (H)= -707.7949 0.08577  
 Gibbs Free Energy (G)= -707.8309 0.04973  
 -----

Frequencies -- 188.5894 298.7225 392.8766

Supporting Information: **4radicalpyridine.out**

-----  
 Using Gaussian 03: IA32L-G03RevC.02 12-Jun-2004  
 =====

```
# g3b3 scf=maxcycle=2000
#N Geom=AllCheck Guess=Read SCRF=Check B3LYP/6-31G(d) Freq
#N Geom=AllCheck Guess=Read SCRF=Check QCISD(T,E4T)/6-31G(d)
#N Geom=AllCheck Guess=Read SCRF=Check MP4/6-31+G(d)
#N Geom=AllCheck Guess=Read SCRF=Check MP4/6-31G(2df,p)
#N Geom=AllCheck Guess=Read SCRF=Check MP2=Full/GTLarge
```

-----  
 Pointgroup= C1 Stoichiometry= C5H4N(2) C1[X(C5H4N)] #Atoms= 10  
 Charge = 0 Multiplicity = 2  
 -----

```
SCF Energy= -246.129629299 Predicted Change= -1.704605D-07
MP2 Energy= -247.2764335465 Correl. Energy= -1.14680424
=====
```

```
Optimization completed.      {Found      2      times}
Item  Max Val.  Criteria  Pass?  RMS Val.  Criteria  Pass?
Force  0.00017 || 0.00045 [ YES ]  0.00005 || 0.00030 [ YES ]
Displ  0.00069 || 0.00180 [ YES ]  0.00069 || 0.00180 [ YES ]
-----
```

```
Atomic      Coordinates (Angstroms)
Type        X          Y          Z
-----
```

```
N   -0.000023  -1.348003  -0.000018
C   -1.144593  -0.658913  -0.000018
C   -1.213190   0.746234  -0.000018
C    0.000017   1.393941   0.000004
C    1.213209   0.746208   0.000025
C    1.144582  -0.658937   0.000022
H   -2.063197  -1.245073  -0.000034
H   -2.171361   1.257530  -0.000018
H    2.171392   1.257483   0.000042
H    2.063174  -1.245117   0.000038
-----
```

## Statistical Thermodynamic Analysis

Temperature= 298.150 Kelvin Pressure= 1.00000 Atm  
 =====

```
SCF Energy=  -246.129629299 Predicted Change= -1.704605D-07
MP2 Energy=  -247.2764335465   MP2 Cor. Energy= -1.14680424
Zero-point correction (ZPE)=      -247.5229  0.07575
Internal Energy (U)=                -247.5187  0.08000
Enthalpy (H)=                       -247.5178  0.08094
Gibbs Free Energy (G)=               -247.5509  0.04778
-----
```

```
Frequencies --  379.7107          446.0950          616.5239
```

Supporting Information: **Schloro2radicalpyridine.out**

Using Gaussian 03: AM64L-G03RevC.02 12-Jun-2004

```

=====
# g3b3 scf=maxcyc=10000
#N Geom=AllCheck Guess=Read SCRF=Check B3LYP/6-31G(d) Freq
#N Geom=AllCheck Guess=Read SCRF=Check QCISD(T,E4T)/6-31G(d)
#N Geom=AllCheck Guess=Read SCRF=Check MP4/6-31+G(d)
#N Geom=AllCheck Guess=Read SCRF=Check MP4/6-31G(2df,p)
#N Geom=AllCheck Guess=Read SCRF=Check MP2=Full/GTLarge

Pointgroup= C1  Stoichiometry= C5H3ClN(2)  C1[X(C5H3ClN)] #Atoms= 10
Charge = 0  Multiplicity = 2

```

```

=====
SCF Energy= -705.060510699  Predicted Change= -1.030232D-07
MP2 Energy= -706.698686068  Correl. Energy= -1.63817536
=====

```

```

Optimization completed.      {Found      2      times}
Item  Max Val.  Criteria  Pass?  RMS Val.  Criteria  Pass?
Force  0.00009 || 0.00045 [ YES ]   0.00003 || 0.00030 [ YES ]
Displ  0.00048 || 0.00180 [ YES ]   0.00048 || 0.00180 [ YES ]

```

```

-----
Atomic      Coordinates (Angstroms)
Type       X          Y          Z

```

```

-----
C      2.240948  -0.131499  0.000320
C      1.688986  1.147672  0.000259
C      0.294567  1.204959  0.000054
C     -0.429146  0.005843 -0.000059
C      0.241127 -1.214929  0.000033
N      1.587722 -1.241659  0.000216
H     -0.229139  2.156341 -0.000018
H      2.294445  2.047530  0.000350
H     -0.293314 -2.160363 -0.000062
Cl     -2.182643  0.033873 -0.000319

```

## Statistical Thermodynamic Analysis

```

Temperature= 298.150 Kelvin  Pressure= 1.00000 Atm

```

```

=====
SCF Energy=  -705.060510699 Predicted Change= -1.030232D-07
MP2 Energy=  -706.698686068 MP2 Cor. Energy= -1.63817536
Zero-point correction (ZPE)=      -707.1326  0.06652
Internal Energy (U)=                -707.1273  0.07188
Enthalpy (H)=                       -707.1263  0.07283
Gibbs Free Energy (G)=               -707.1630  0.03619

```

```

-----
Frequencies --  203.0534          293.9929          395.3791

```

**Chloropyrimidines**Supporting Information: **24dichloropyrimidine.out**-----  
Using Gaussian 03: IA32L-G03RevC.02 12-Jun-2004  
=====

```
# g3b3 scf=(restart)
#N Geom=AllCheck Guess=Read SCRF=Check B3LYP/6-31G(d) Freq
#N Geom=AllCheck Guess=Read SCRF=Check QCISD(T,E4T)/6-31G(d)
#N Geom=AllCheck Guess=Read SCRF=Check MP4/6-31+G(d)
#N Geom=AllCheck Guess=Read SCRF=Check MP4/6-31G(2df,p)
#N Geom=AllCheck Guess=Read SCRF=Check MP2=Full/GTLarge
```

```
Pointgroup= C1  Stoichiometry= C4H2Cl2N2  C1[X(C4H2Cl2N2)] #Atoms= 10
Charge = 0  Multiplicity = 1
```

```
SCF Energy= -1180.63267580  Predicted Change= -3.336397D-07
MP2 Energy= -1182.882948464  Correl. Energy= -2.25027266
```

```
=====
Optimization completed.      {Found      2      times}
Item  Max Val.  Criteria  Pass?  RMS Val.  Criteria  Pass?
Force  0.00022 || 0.00045 [ YES ]  0.00006 || 0.00030 [ YES ]
Displ  0.00060 || 0.00180 [ YES ]  0.00060 || 0.00180 [ YES ]
```

```
-----
Atomic      Coordinates (Angstroms)
Type       X          Y          Z
```

```
-----
C   -1.118308   0.024822   0.000061
N    0.002373  -0.694172   0.000024
C    1.124896   0.006583   0.000009
C    1.158550   1.401818   0.000013
C   -0.085923   2.023735   0.000017
N   -1.242039   1.345077   0.000029
H    2.087600   1.957549   0.000004
H   -0.167263   3.108435   0.000006
Cl   -2.606131  -0.890948  -0.000048
Cl    2.622721  -0.895174  -0.000010
```

## Statistical Thermodynamic Analysis

```
Temperature= 298.150 Kelvin  Pressure= 1.00000 Atm
```

```
=====
SCF Energy=  -1180.63267580 Predicted Change= -3.336397D-07
MP2 Energy=  -1182.882948464   MP2 Cor. Energy= -2.25027266
Zero-point correction (ZPE)=    -1183.4583  0.05766
Internal Energy (U)=             -1183.4520  0.06404
Enthalpy (H)=                    -1183.4510  0.06498
Gibbs Free Energy (G)=           -1183.4902  0.02576
```

```
-----
Frequencies --  162.2530           174.6545           210.3685
```

Supporting Information: **25dichloropyrimidine.out**

-----  
 Using Gaussian 03: IA32L-G03RevC.02 12-Jun-2004  
 =====

```
# g3b3 scf=(restart,maxcycle=10000)
#N Geom=AllCheck Guess=Read SCRF=Check B3LYP/6-31G(d) Freq
#N Geom=AllCheck Guess=Read SCRF=Check QCISD(T,E4T)/6-31G(d)
#N Geom=AllCheck Guess=Read SCRF=Check MP4/6-31+G(d)
#N Geom=AllCheck Guess=Read SCRF=Check MP4/6-31G(2df,p)
#N Geom=AllCheck Guess=Read SCRF=Check MP2=Full/GTLarge
```

-----  
 Pointgroup= C1 Stoichiometry= C4H2Cl2N2 C1[X(C4H2Cl2N2)] #Atoms= 10  
 Charge = 0 Multiplicity = 1  
 -----

```
SCF Energy= -1180.62728812 Predicted Change= -1.970353D-07
MP2 Energy= -1182.877615971 Correl. Energy= -2.25032785
=====
```

```
Optimization completed.      {Found      2      times}
Item  Max Val.  Criteria  Pass?  RMS Val.  Criteria  Pass?
Force  0.00018 || 0.00045 [ YES ]  0.00004 || 0.00030 [ YES ]
Displ  0.00062 || 0.00180 [ YES ]  0.00062 || 0.00180 [ YES ]
=====
```

-----  
 Atomic Coordinates (Angstroms)  
 Type X Y Z  
 -----

|    |           |           |           |
|----|-----------|-----------|-----------|
| C  | 1.307887  | 0.000000  | 0.000027  |
| N  | 0.724385  | -1.194343 | 0.000013  |
| C  | -0.611304 | -1.190785 | 0.000002  |
| C  | -1.337437 | 0.000000  | -0.000002 |
| C  | -0.611302 | 1.190785  | 0.000001  |
| N  | 0.724385  | 1.194343  | 0.000010  |
| H  | -1.110381 | -2.156893 | 0.000000  |
| H  | -1.110380 | 2.156893  | -0.000006 |
| Cl | 3.055200  | 0.000000  | -0.000007 |
| Cl | -3.079182 | 0.000000  | -0.000012 |

-----

## Statistical Thermodynamic Analysis

Temperature= 298.150 Kelvin Pressure= 1.00000 Atm  
 =====

```
SCF Energy= -1180.62728812 Predicted Change= -1.970353D-07
MP2 Energy= -1182.877615971 MP2 Cor. Energy= -2.25032785
Zero-point correction (ZPE)= -1183.4536 0.05770
Internal Energy (U)= -1183.4472 0.06412
Enthalpy (H)= -1183.4462 0.06507
Gibbs Free Energy (G)= -1183.4855 0.02577
=====
```

Frequencies -- 88.7641 222.1060 311.4229



Supporting Information: **2chloro4radicalpyrimidine.out**

-----  
 Using Gaussian 03: IA32L-G03RevC.02 12-Jun-2004  
 =====

```
#g3b3 scf=(restart,maxcyc=10000)
#N Geom=AllCheck Guess=Read SCRF=Check B3LYP/6-31G(d) Freq
#N Geom=AllCheck Guess=Read SCRF=Check QCISD(T,E4T)/6-31G(d)
#N Geom=AllCheck Guess=Read SCRF=Check MP4/6-31+G(d)
#N Geom=AllCheck Guess=Read SCRF=Check MP4/6-31G(2df,p)
#N Geom=AllCheck Guess=Read SCRF=Check MP2=Full/GTLarge
```

-----  
 Pointgroup= C1 Stoichiometry= C4H2ClN2(2) C1[X(C4H2ClN2)] #Atoms= 9  
 Charge = 0 Multiplicity = 2  
 -----

```
SCF Energy= -721.061762534 Predicted Change= -2.481845D-08
MP2 Energy= -722.7453332521 Correl. Energy= -1.68357071
=====
```

```
Optimization completed.      {Found      2      times}
Item  Max Val.  Criteria  Pass?  RMS Val.  Criteria  Pass?
Force  0.00006 || 0.00045 [ YES ]  0.00001 || 0.00030 [ YES ]
Displ  0.00031 || 0.00180 [ YES ]  0.00031 || 0.00180 [ YES ]
-----
```

| Atomic<br>Type | Coordinates (Angstroms) |   |   |
|----------------|-------------------------|---|---|
|                | X                       | Y | Z |

|    |           |           |           |
|----|-----------|-----------|-----------|
| C  | 0.427104  | -0.011291 | 0.000034  |
| N  | -0.143002 | -1.226299 | 0.000005  |
| C  | -1.433646 | -1.254091 | -0.000009 |
| C  | -2.258848 | -0.135669 | -0.000005 |
| C  | -1.556922 | 1.072157  | -0.000003 |
| N  | -0.216535 | 1.142920  | 0.000013  |
| H  | -3.341233 | -0.179502 | -0.000013 |
| H  | -2.083731 | 2.025123  | -0.000008 |
| Cl | 2.169153  | 0.041847  | -0.000012 |

## Statistical Thermodynamic Analysis

Temperature= 298.150 Kelvin Pressure= 1.00000 Atm  
 =====

```
SCF Energy= -721.061762534 Predicted Change= -2.481845D-08
MP2 Energy= -722.7453332521 MP2 Cor. Energy= -1.68357071
Zero-point correction (ZPE)= -723.1864 0.05447
Internal Energy (U)= -723.1812 0.05967
Enthalpy (H)= -723.1803 0.06062
Gibbs Free Energy (G)= -723.2167 0.02423
-----
```

```
Frequencies -- 161.1892      329.9192      425.8177
```

Supporting Information: **2chloropyrimidine.out**

-----  
 Using Gaussian 03: IA32L-G03RevC.02 12-Jun-2004  
 =====

```
# g3b3 scf=maxcyc=1000
#N Geom=AllCheck Guess=Read SCRF=Check B3LYP/6-31G(d) Freq
#N Geom=AllCheck Guess=Read SCRF=Check QCISD(T,E4T)/6-31G(d)
#N Geom=AllCheck Guess=Read SCRF=Check MP4/6-31+G(d)
#N Geom=AllCheck Guess=Read SCRF=Check MP4/6-31G(2df,p)
#N Geom=AllCheck Guess=Read SCRF=Check MP2=Full/GTLarge
```

-----  
 Pointgroup= C1 Stoichiometry= C4H3ClN2 C1[X(C4H3ClN2)] #Atoms= 10  
 Charge = 0 Multiplicity = 1  
 -----

```
SCF Energy= -721.703149472 Predicted Change= -4.184238D-07
MP2 Energy= -723.4615366276 Correl. Energy= -1.75838715
=====
```

```
Optimization completed.      {Found 2 times}
Item  Max Val.  Criteria  Pass?  RMS Val.  Criteria  Pass?
Force  0.00028 || 0.00045 [ YES ]  0.00007 || 0.00030 [ YES ]
Displ  0.00090 || 0.00180 [ YES ]  0.00090 || 0.00180 [ YES ]
-----
```

| Atomic Type | Coordinates (Angstroms) |   |   |
|-------------|-------------------------|---|---|
|             | X                       | Y | Z |

|    |           |           |           |
|----|-----------|-----------|-----------|
| C  | 0.444394  | -0.000001 | 0.000031  |
| N  | -0.133807 | -1.196133 | 0.000012  |
| C  | -1.472848 | -1.182728 | -0.000002 |
| C  | -2.209087 | 0.000000  | -0.000006 |
| C  | -1.472846 | 1.182729  | -0.000002 |
| N  | -0.133806 | 1.196133  | 0.000009  |
| H  | -1.959362 | -2.156189 | -0.000003 |
| H  | -3.293364 | 0.000002  | -0.000013 |
| H  | -1.959359 | 2.156190  | -0.000010 |
| Cl | 2.196924  | 0.000000  | -0.000014 |

## Statistical Thermodynamic Analysis

Temperature= 298.150 Kelvin Pressure= 1.00000 Atm  
 =====

```
SCF Energy= -721.703149472 Predicted Change= -4.184238D-07
MP2 Energy= -723.4615366276 MP2 Cor. Energy= -1.75838715
Zero-point correction (ZPE)= -723.8525 0.06742
Internal Energy (U)= -723.8472 0.07266
Enthalpy (H)= -723.8463 0.07360
Gibbs Free Energy (G)= -723.8821 0.03774
-----
```

Frequencies -- 160.2917 329.6298 414.8918

Supporting Information: **2radicalpyrimidine.out**

-----  
 Using Gaussian 03: IA32L-G03RevC.02 12-Jun-2004  
 =====

```
#g3b3 scf=maxcyc=1000
#N Geom=AllCheck Guess=Read SCRF=Check B3LYP/6-31G(d) Freq
#N Geom=AllCheck Guess=Read SCRF=Check QCISD(T,E4T)/6-31G(d)
#N Geom=AllCheck Guess=Read SCRF=Check MP4/6-31+G(d)
#N Geom=AllCheck Guess=Read SCRF=Check MP4/6-31G(2df,p)
#N Geom=AllCheck Guess=Read SCRF=Check MP2=Full/GTLarge
```

-----  
 Pointgroup= C1 Stoichiometry= C4H3N2(2) C1[X(C4H3N2)] #Atoms= 9  
 Charge = 0 Multiplicity = 2  
 -----

```
SCF Energy= -262.132594337 Predicted Change= -7.242033D-08
MP2 Energy= -263.3215926432 Correl. Energy= -1.1889983
=====
```

```
Optimization completed.      {Found      2      times}
Item  Max Val.  Criteria  Pass?  RMS Val.  Criteria  Pass?
Force  0.00006 || 0.00045 [ YES ]  0.00003 || 0.00030 [ YES ]
Displ  0.00036 || 0.00180 [ YES ]  0.00036 || 0.00180 [ YES ]
-----
```

| Atomic Type | Coordinates (Angstroms) |   |   |
|-------------|-------------------------|---|---|
|             | X                       | Y | Z |

|   |           |           |           |
|---|-----------|-----------|-----------|
| C | 0.000000  | -1.326549 | -0.000014 |
| N | 1.193070  | -0.785393 | -0.000009 |
| C | 1.190745  | 0.561818  | 0.000004  |
| C | 0.000001  | 1.288489  | 0.000013  |
| C | -1.190744 | 0.561819  | 0.000007  |
| N | -1.193071 | -0.785392 | -0.000007 |
| H | 2.161262  | 1.054372  | 0.000009  |
| H | 0.000001  | 2.373293  | 0.000025  |
| H | -2.161261 | 1.054373  | 0.000014  |

## Statistical Thermodynamic Analysis

Temperature= 298.150 Kelvin Pressure= 1.00000 Atm  
 =====

```
SCF Energy= -262.132594337 Predicted Change= -7.242033D-08
MP2 Energy= -263.3215926432 MP2 Cor. Energy= -1.1889983
Zero-point correction (ZPE)= -263.5779 0.06407
Internal Energy (U)= -263.5738 0.06825
Enthalpy (H)= -263.5728 0.06919
Gibbs Free Energy (G)= -263.6059 0.03614
-----
```

```
Frequencies -- 379.6520          383.2446          586.1610
```

Supporting Information: **4chloro2radicalpyrimidine.out**

Using Gaussian 03: IA32L-G03RevC.02 12-Jun-2004

```
=====
#g3b3 scf=(restart,maxcyc=10000)
#N Geom=AllCheck Guess=Read SCRF=Check B3LYP/6-31G(d) Freq
#N Geom=AllCheck Guess=Read SCRF=Check QCISD(T,E4T)/6-31G(d)
#N Geom=AllCheck Guess=Read SCRF=Check MP4/6-31+G(d)
#N Geom=AllCheck Guess=Read SCRF=Check MP4/6-31G(2df,p)
#N Geom=AllCheck Guess=Read SCRF=Check MP2=Full/GTLarge

Pointgroup= C1  Stoichiometry= C4H2ClN2(2)  C1[X(C4H2ClN2)]  #Atoms= 9
Charge = 0  Multiplicity = 2
=====
```

```
SCF Energy= -721.062100302  Predicted Change= -5.106616D-07
MP2 Energy= -722.7438229009  Correl. Energy= -1.68172259
=====
```

```
Optimization completed.      {Found 2 times}
Item  Max Val.  Criteria  Pass?  RMS Val.  Criteria  Pass?
Force  0.00029 || 0.00045 [ YES ]  0.00008 || 0.00030 [ YES ]
Displ  0.00095 || 0.00180 [ YES ]  0.00095 || 0.00180 [ YES ]
=====
```

```
Atomic      Coordinates (Angstroms)
Type        X          Y          Z
=====
```

```
  C    -1.443584   -1.210243   0.000024
  N    -0.130468   -1.237403   0.000015
  C     0.437188   -0.033510   0.000001
  C    -0.308573    1.149475  -0.000009
  C    -1.693442    1.003826   0.000004
  N    -2.282816   -0.210052   0.000021
  H     0.167378    2.122190  -0.000024
  H    -2.350100    1.871118   0.000000
  Cl    2.183893    0.040094  -0.000021
=====
```

## Statistical Thermodynamic Analysis

Temperature= 298.150 Kelvin Pressure= 1.00000 Atm

```
=====
SCF Energy=  -721.062100302 Predicted Change= -5.106616D-07
MP2 Energy=  -722.7438229009  MP2 Cor. Energy= -1.68172259
Zero-point correction (ZPE)=      -723.1843  0.05447
Internal Energy (U)=                -723.1791  0.05969
Enthalpy (H)=                       -723.1781  0.06064
Gibbs Free Energy (G)=               -723.2146  0.02419
=====
```

```
Frequencies -- 170.8870          315.7788          390.9529
=====
```

Supporting Information: **4chloropyrimidine.out**

-----  
 Using Gaussian 03: IA32L-G03RevC.02 12-Jun-2004  
 =====

```
#g3b3 scf=maxcyc=1000
#N Geom=AllCheck Guess=Read SCRF=Check B3LYP/6-31G(d) Freq
#N Geom=AllCheck Guess=Read SCRF=Check QCISD(T,E4T)/6-31G(d)
#N Geom=AllCheck Guess=Read SCRF=Check MP4/6-31+G(d)
#N Geom=AllCheck Guess=Read SCRF=Check MP4/6-31G(2df,p)
#N Geom=AllCheck Guess=Read SCRF=Check MP2=Full/GTLarge
```

-----  
 Pointgroup= C1 Stoichiometry= C4H3ClN2 C1[X(C4H3ClN2)] #Atoms= 10  
 Charge = 0 Multiplicity = 1  
 -----

```
SCF Energy= -721.704519565 Predicted Change= -2.859635D-07
MP2 Energy= -723.4632033371 Correl. Energy= -1.75868377
=====
```

```
Optimization completed.      {Found      2      times}
Item  Max Val.  Criteria  Pass?  RMS Val.  Criteria  Pass?
Force  0.00017 || 0.00045 [ YES ]  0.00005 || 0.00030 [ YES ]
Displ  0.00050 || 0.00180 [ YES ]  0.00050 || 0.00180 [ YES ]
-----
```

```
Atomic      Coordinates (Angstroms)
Type        X          Y          Z
-----
```

```
  C    -1.480500   -1.149822   0.000008
  N    -0.140267   -1.186014   0.000002
  C     0.464525   -0.011134   0.000008
  C    -0.218781   1.205572   0.000004
  C    -1.607287   1.108579   0.000005
  N    -2.255786   -0.064769   0.000008
  H    -1.983451   -2.114078   0.000001
  H     0.297826   2.157773   0.000002
  H    -2.223847   2.005516   0.000009
  Cl    2.219653   -0.012524  -0.000014
-----
```

## Statistical Thermodynamic Analysis

Temperature= 298.150 Kelvin Pressure= 1.00000 Atm  
 =====

```
SCF Energy=  -721.704519565 Predicted Change= -2.859635D-07
MP2 Energy=  -723.4632033371 MP2 Cor. Energy= -1.75868377
Zero-point correction (ZPE)=      -723.8538  0.06762
Internal Energy (U)=                -723.8486  0.07286
Enthalpy (H)=                       -723.8476  0.07381
Gibbs Free Energy (G)=               -723.8835  0.03793
-----
```

```
Frequencies -- 172.3190          314.1974          384.2932
```

Supporting Information: **4radicalpyrimidine.out**

Using Gaussian 03: IA32L-G03RevC.02 12-Jun-2004

```

=====
# g3b3 scf=maxcyc=10000
#N Geom=AllCheck Guess=Read SCRF=Check B3LYP/6-31G(d) Freq
#N Geom=AllCheck Guess=Read SCRF=Check QCISD(T,E4T)/6-31G(d)
#N Geom=AllCheck Guess=Read SCRF=Check MP4/6-31+G(d)
#N Geom=AllCheck Guess=Read SCRF=Check MP4/6-31G(2df,p)
#N Geom=AllCheck Guess=Read SCRF=Check MP2=Full/GTLarge

Pointgroup= C1  Stoichiometry= C4H3N2(2)  C1[X(C4H3N2)]  #Atoms= 9
Charge = 0  Multiplicity = 2

```

```

=====
SCF Energy= -262.133782640  Predicted Change= -2.747307D-07
MP2 Energy= -263.3243232399  Correl. Energy= -1.1905406
=====

```

```

Optimization completed.      {Found      2      times}
Item  Max Val.  Criteria  Pass?  RMS Val.  Criteria  Pass?
Force  0.00015 || 0.00045 [ YES ]  0.00005 || 0.00030 [ YES ]
Displ  0.00062 || 0.00180 [ YES ]  0.00062 || 0.00180 [ YES ]

```

```

-----
Atomic      Coordinates (Angstroms)
Type        X          Y          Z

```

```

-----
C      1.244965   0.378573  -0.000021
N      1.030909  -0.954923   0.000006
C     -0.196072  -1.354065   0.000008
C     -1.303860  -0.513427   0.000001
C     -0.978320   0.845797   0.000005
N      0.285433   1.297603  -0.000003
H      2.276970   0.719779   0.000016
H     -2.330117  -0.862989   0.000000
H     -1.761525   1.603180   0.000003

```

## Statistical Thermodynamic Analysis

```

Temperature= 298.150 Kelvin  Pressure= 1.00000 Atm

```

```

=====
SCF Energy=  -262.133782640 Predicted Change= -2.747307D-07
MP2 Energy=  -263.3243232399  MP2 Cor. Energy= -1.1905406
Zero-point correction (ZPE)=      -263.5818  0.06427
Internal Energy (U)=                -263.5777  0.06843
Enthalpy (H)=                       -263.5767  0.06937
Gibbs Free Energy (G)=               -263.6097  0.03635

```

```

-----
Frequencies --  349.6074          435.7243          602.1446

```

Supporting Information: **Schlörpyrimidine.out**

-----  
 Using Gaussian 03: IA32L-G03RevC.02 12-Jun-2004  
 =====

```
#g3b3 scf=maxcyc=1000
#N Geom=AllCheck Guess=Read SCRF=Check B3LYP/6-31G(d) Freq
#N Geom=AllCheck Guess=Read SCRF=Check QCISD(T,E4T)/6-31G(d)
#N Geom=AllCheck Guess=Read SCRF=Check MP4/6-31+G(d)
#N Geom=AllCheck Guess=Read SCRF=Check MP4/6-31G(2df,p)
#N Geom=AllCheck Guess=Read SCRF=Check MP2=Full/GTLarge
```

-----  
 Pointgroup= C1 Stoichiometry= C4H3ClN2 C1[X(C4H3ClN2)] #Atoms= 10  
 Charge = 0 Multiplicity = 1  
 -----

```
SCF Energy= -721.699107371 Predicted Change= -7.402033D-08
MP2 Energy= -723.4581703771 Correl. Energy= -1.759063
=====
```

```
Optimization completed.      {Found      2      times}
Item  Max Val.  Criteria  Pass?  RMS Val.  Criteria  Pass?
Force  0.00006 || 0.00045 [ YES ]  0.00003 || 0.00030 [ YES ]
Displ  0.00053 || 0.00180 [ YES ]  0.00053 || 0.00180 [ YES ]
-----
```

```
Atomic      Coordinates (Angstroms)
Type       X          Y          Z
-----
```

```
C   -2.173564   -0.000001   -0.000004
N   -1.577300   -1.196708   -0.000002
C   -0.241170   -1.192972    0.000000
C    0.480926    0.000000    0.000002
C   -0.241171    1.192973    0.000004
N   -1.577300    1.196709    0.000000
H    0.265663   -2.155620   -0.000002
H   -3.261076    0.000000    0.000000
H    0.265663    2.155620    0.000002
Cl   2.227166    0.000000    0.000000
-----
```

## Statistical Thermodynamic Analysis

Temperature= 298.150 Kelvin Pressure= 1.00000 Atm  
 =====

```
SCF Energy=  -721.699107371 Predicted Change= -7.402033D-08
MP2 Energy=  -723.4581703771   MP2 Cor. Energy= -1.759063
Zero-point correction (ZPE)=      -723.8492  0.06765
Internal Energy (U)=                -723.8439  0.07293
Enthalpy (H)=                       -723.8429  0.07388
Gibbs Free Energy (G)=               -723.8789  0.03794
-----
```

```
Frequencies -- 186.2102          286.8819          418.8264
```

Supporting Information: **5radicalpyrimidine.out**

-----  
 Using Gaussian 03: IA32L-G03RevC.02 12-Jun-2004  
 =====

```
#g3b3 scf=maxcyc=1000
#N Geom=AllCheck Guess=Read SCRF=Check B3LYP/6-31G(d) Freq
#N Geom=AllCheck Guess=Read SCRF=Check QCISD(T,E4T)/6-31G(d)
#N Geom=AllCheck Guess=Read SCRF=Check MP4/6-31+G(d)
#N Geom=AllCheck Guess=Read SCRF=Check MP4/6-31G(2df,p)
#N Geom=AllCheck Guess=Read SCRF=Check MP2=Full/GTLarge
```

-----  
 Pointgroup= C1 Stoichiometry= C4H3N2(2) C1[X(C4H3N2)] #Atoms= 9  
 Charge = 0 Multiplicity = 2  
 -----

```
SCF Energy= -262.126702463 Predicted Change= -1.749339D-07
MP2 Energy= -263.3056514247 Correl. Energy= -1.17894896
=====
```

```
Optimization completed.      {Found      2      times}
Item  Max Val.  Criteria  Pass?  RMS Val.  Criteria  Pass?
Force  0.00017 || 0.00045 [ YES ]  0.00006 || 0.00030 [ YES ]
Displ  0.00089 || 0.00180 [ YES ]  0.00089 || 0.00180 [ YES ]
-----
```

| Atomic<br>Type | Coordinates (Angstroms) |   |   |
|----------------|-------------------------|---|---|
|                | X                       | Y | Z |

|   |           |           |           |
|---|-----------|-----------|-----------|
| C | 0.000000  | 1.240526  | 0.000006  |
| N | -1.200979 | 0.653719  | -0.000002 |
| C | -1.201980 | -0.694200 | -0.000003 |
| C | 0.000000  | -1.368857 | 0.000001  |
| C | 1.201980  | -0.694200 | -0.000004 |
| N | 1.200979  | 0.653719  | 0.000001  |
| H | -2.169736 | -1.190232 | 0.000000  |
| H | 0.000000  | 2.328786  | -0.000005 |
| H | 2.169736  | -1.190233 | 0.000007  |

## Statistical Thermodynamic Analysis

Temperature= 298.150 Kelvin Pressure= 1.00000 Atm  
 =====

```
SCF Energy= -262.126702463 Predicted Change= -1.749339D-07
MP2 Energy= -263.3056514247 MP2 Cor. Energy= -1.17894896
Zero-point correction (ZPE)= -263.5699 0.06430
Internal Energy (U)= -263.5657 0.06846
Enthalpy (H)= -263.5648 0.06940
Gibbs Free Energy (G)= -263.5978 0.03637
-----
```

```
Frequencies -- 381.6012      399.0825      567.7609
```



**Chloropyrroles**Supporting Information: **23dichloropyrrole.out**-----  
Using Gaussian 03: IA32L-G03RevC.02 12-Jun-2004  
=====#g3b3 scf=maxcyc=1000  
#N Geom=AllCheck Guess=Read SCRF=Check B3LYP/6-31G(d) Freq  
#N Geom=AllCheck Guess=Read SCRF=Check QCISD(T,E4T)/6-31G(d)  
#N Geom=AllCheck Guess=Read SCRF=Check MP4/6-31+G(d)  
#N Geom=AllCheck Guess=Read SCRF=Check MP4/6-31G(2df,p)  
#N Geom=AllCheck Guess=Read SCRF=Check MP2=Full/GTLarge  
-----Pointgroup= C1 Stoichiometry= C4H3Cl2N C1[X(C4H3Cl2N)] #Atoms= 10  
Charge = 0 Multiplicity = 1  
-----SCF Energy= -1126.73201128 Predicted Change= -2.039141D-07  
MP2 Energy= -1128.769135076 Correl. Energy= -2.03712379  
=====Optimization completed. {Found 2 times}  
Item Max Val. Criteria Pass? RMS Val. Criteria Pass?  
Force 0.00019 || 0.00045 [ YES ] 0.00005 || 0.00030 [ YES ]  
Displ 0.00099 || 0.00180 [ YES ] 0.00099 || 0.00180 [ YES ]  
-----Atomic Coordinates (Angstroms)  
Type X Y Z  
-----C 0.466819 2.228235 0.000101  
C -0.809431 1.712991 0.000173  
C -0.686247 0.294899 0.000011  
C 0.659188 -0.007178 -0.000006  
N 1.354008 1.176444 0.000032  
H 2.360596 1.243097 -0.000109  
H 0.816721 3.249778 0.000140  
H -1.734243 2.271245 0.000280  
Cl 1.473508 -1.524393 -0.000103  
Cl -1.985456 -0.850485 -0.000026  
-----

Statistical Thermodynamic Analysis

Temperature= 298.150 Kelvin Pressure= 1.00000 Atm  
=====SCF Energy= -1126.73201128 Predicted Change= -2.039141D-07  
MP2 Energy= -1128.769135076 MP2 Cor. Energy= -2.03712379  
Zero-point correction (ZPE)= -1129.2864 0.06393  
Internal Energy (U)= -1129.2801 0.07018  
Enthalpy (H)= -1129.2792 0.07113  
Gibbs Free Energy (G)= -1129.3176 0.03268  
-----

Frequencies -- 165.1609 195.1941 240.7336

Supporting Information: **24dichloropyrrole.out**

-----  
 Using Gaussian 03: AM64L-G03RevC.02 12-Jun-2004  
 =====

```
#g3b3 scf=maxcyc=5000
#N Geom=AllCheck Guess=Read SCRF=Check B3LYP/6-31G(d) Freq
#N Geom=AllCheck Guess=Read SCRF=Check QCISD(T,E4T)/6-31G(d)
#N Geom=AllCheck Guess=Read SCRF=Check MP4/6-31+G(d)
#N Geom=AllCheck Guess=Read SCRF=Check MP4/6-31G(2df,p)
#N Geom=AllCheck Guess=Read SCRF=Check MP2=Full/GTLarge
```

-----  
 Pointgroup= C1 Stoichiometry= C4H3Cl2N C1[X(C4H3Cl2N)] #Atoms= 10  
 Charge = 0 Multiplicity = 1  
 -----

```
SCF Energy= -1126.73325482 Predicted Change= -1.660836D-07
MP2 Energy= -1128.769041565 Correl. Energy= -2.03578674
=====
```

```
Optimization completed.      {Found      2      times}
Item  Max Val.  Criteria  Pass?  RMS Val.  Criteria  Pass?
Force  0.00011 || 0.00045 [ YES ]  0.00003 || 0.00030 [ YES ]
Displ  0.00085 || 0.00180 [ YES ]  0.00085 || 0.00180 [ YES ]
-----
```

```
Atomic      Coordinates (Angstroms)
Type        X          Y          Z
-----
```

```
  C    -0.676313    1.350999    0.000155
  C    -1.133136    0.053018    0.000083
  C    -0.020579   -0.834322    0.000108
  C     1.092999   -0.026356   -0.000077
  N     0.700430    1.286312    0.000022
  H     1.330301    2.074374   -0.000073
  H    -1.205956    2.290656    0.000237
  Cl    2.771613   -0.440347   -0.000268
  H    -0.040527   -1.913308    0.000148
  Cl   -2.804827   -0.425296    0.000146
-----
```

## Statistical Thermodynamic Analysis

Temperature= 298.150 Kelvin Pressure= 1.00000 Atm  
 =====

```
SCF Energy= -1126.73325482 Predicted Change= -1.660836D-07
MP2 Energy= -1128.769041565 MP2 Cor. Energy= -2.03578674
Zero-point correction (ZPE)= -1129.2878 0.06380
Internal Energy (U)= -1129.2815 0.07008
Enthalpy (H)= -1129.2805 0.07103
Gibbs Free Energy (G)= -1129.3190 0.03253
-----
```

```
Frequencies -- 147.9607      198.4095      277.2600
```

Supporting Information: **2chloro3radicalpyrrole.out**

Using Gaussian 03: IA32L-G03RevC.02 12-Jun-2004

#g3b3

#N Geom=AllCheck Guess=Read SCRF=Check B3LYP/6-31G(d) Freq

#N Geom=AllCheck Guess=Read SCRF=Check QCISD(T,E4T)/6-31G(d)

#N Geom=AllCheck Guess=Read SCRF=Check MP4/6-31+G(d)

#N Geom=AllCheck Guess=Read SCRF=Check MP4/6-31G(2df,p)

#N Geom=AllCheck Guess=Read SCRF=Check MP2=Full/GTLarge

Pointgroup= C1 Stoichiometry= C4H3ClN(2) C1[X(C4H3ClN)] #Atoms= 9

Charge = 0 Multiplicity = 2

SCF Energy= -667.148572026 Predicted Change= -2.734114D-07

MP2 Energy= -668.6361531805 Correl. Energy= -1.48758115

Optimization completed. {Found 2 times}

| Item  | Max Val. | Criteria | Pass?   | RMS Val. | Criteria | Pass?   |
|-------|----------|----------|---------|----------|----------|---------|
| Force | 0.00015  | 0.00045  | [ YES ] | 0.00005  | 0.00030  | [ YES ] |
| Displ | 0.00138  | 0.00180  | [ YES ] | 0.00138  | 0.00180  | [ YES ] |

| Atomic Type | Coordinates (Angstroms) |   |   |
|-------------|-------------------------|---|---|
|             | X                       | Y | Z |

|    |           |           |           |
|----|-----------|-----------|-----------|
| C  | -1.842212 | 0.652391  | 0.000140  |
| C  | -1.930882 | -0.728599 | 0.000117  |
| C  | -0.596531 | -1.191510 | 0.000087  |
| C  | 0.264366  | -0.131437 | -0.000013 |
| N  | -0.511944 | 1.009380  | -0.000031 |
| H  | -0.149752 | 1.951804  | -0.000181 |
| H  | -2.616072 | 1.407002  | 0.000198  |
| H  | -2.839391 | -1.313325 | 0.000188  |
| Cl | 1.989434  | -0.042130 | -0.000116 |

## Statistical Thermodynamic Analysis

Temperature= 298.150 Kelvin Pressure= 1.00000 Atm

SCF Energy= -667.148572026 Predicted Change= -2.734114D-07

MP2 Energy= -668.6361531805 MP2 Cor. Energy= -1.48758115

Zero-point correction (ZPE)= -668.9986 0.06048

Internal Energy (U)= -668.9935 0.06561

Enthalpy (H)= -668.9925 0.06655

Gibbs Free Energy (G)= -669.0282 0.03088

Frequencies -- 196.3570 301.7503 381.4914

Supporting Information: **2chloro4radicalpyrrole.out**

-----  
 Using Gaussian 03: AM64L-G03RevC.02 12-Jun-2004  
 =====

#g3b3 scf=maxcyc=1000  
 #N Geom=AllCheck Guess=Read SCRF=Check B3LYP/6-31G(d) Freq  
 #N Geom=AllCheck Guess=Read SCRF=Check QCISD(T,E4T)/6-31G(d)  
 #N Geom=AllCheck Guess=Read SCRF=Check MP4/6-31+G(d)  
 #N Geom=AllCheck Guess=Read SCRF=Check MP4/6-31G(2df,p)  
 #N Geom=AllCheck Guess=Read SCRF=Check MP2=Full/GTLarge

-----  
 Pointgroup= C1 Stoichiometry= C4H3ClN(2) C1[X(C4H3ClN)] #Atoms= 9  
 Charge = 0 Multiplicity = 2  
 -----

SCF Energy= -667.149851155 Predicted Change= -5.608970D-07  
 MP2 Energy= -668.6385850692 Correl. Energy= -1.48873391  
 =====

Optimization completed. {Found 1 times}  
 Item Max Val. Criteria Pass? RMS Val. Criteria Pass?  
 Force 0.00020 || 0.00045 [ YES ] 0.00007 || 0.00030 [ YES ]  
 Displ 0.00190 || 0.00180 [ NO ] 0.00190 || 0.00180 [ YES ]  
 -----

Atomic Coordinates (Angstroms)  
 Type X Y Z  
 -----

|    |           |           |           |
|----|-----------|-----------|-----------|
| C  | 1.931340  | -0.608045 | 0.000120  |
| C  | 1.903931  | 0.758430  | 0.000113  |
| C  | 0.580471  | 1.250786  | 0.000068  |
| C  | -0.199711 | 0.109719  | -0.000021 |
| N  | 0.600857  | -1.003032 | 0.000088  |
| H  | 0.257709  | -1.952748 | 0.000036  |
| H  | 2.735551  | -1.327136 | 0.000164  |
| Cl | -1.924893 | -0.060891 | -0.000151 |
| H  | 0.227737  | 2.270907  | 0.000065  |

## Statistical Thermodynamic Analysis

Temperature= 298.150 Kelvin Pressure= 1.00000 Atm  
 =====

SCF Energy= -667.149851155 Predicted Change= -5.608970D-07  
 MP2 Energy= -668.6385850692 MP2 Cor. Energy= -1.48873391  
 Zero-point correction (ZPE)= -669.0006 0.06038  
 Internal Energy (U)= -668.9955 0.06552  
 Enthalpy (H)= -668.9946 0.06646  
 Gibbs Free Energy (G)= -669.0302 0.03081  
 -----

Frequencies -- 208.0421 303.5377 380.7264

Supporting Information: **2chloropyrrole.out**

-----  
 Using Gaussian 03: IA32L-G03RevC.02 12-Jun-2004  
 =====

```
#g3b3 scf=maxcyc=1000
#N Geom=AllCheck Guess=Read SCRF=Check B3LYP/6-31G(d) Freq
#N Geom=AllCheck Guess=Read SCRF=Check QCISD(T,E4T)/6-31G(d)
#N Geom=AllCheck Guess=Read SCRF=Check MP4/6-31+G(d)
#N Geom=AllCheck Guess=Read SCRF=Check MP4/6-31G(2df,p)
#N Geom=AllCheck Guess=Read SCRF=Check MP2=Full/GTLarge
```

-----  
 Pointgroup= C1 Stoichiometry= C4H4ClN C1[X(C4H4ClN)] #Atoms= 10  
 Charge = 0 Multiplicity = 1  
 -----

```
SCF Energy= -667.806778526 Predicted Change= -1.160967D-07
MP2 Energy= -669.3529330346 Correl. Energy= -1.5461545
=====
```

```
Optimization completed.      {Found      2      times}
Item  Max Val.  Criteria  Pass?  RMS Val.  Criteria  Pass?
Force  0.00013 || 0.00045 [ YES ]  0.00003 || 0.00030 [ YES ]
Displ  0.00063 || 0.00180 [ YES ]  0.00063 || 0.00180 [ YES ]
-----
```

| Atomic Type | Coordinates (Angstroms) |   |   |
|-------------|-------------------------|---|---|
|             | X                       | Y | Z |

|    |           |           |           |
|----|-----------|-----------|-----------|
| C  | 1.832165  | -0.713209 | 0.000063  |
| C  | 1.913868  | 0.661372  | 0.000181  |
| C  | 0.585035  | 1.180161  | -0.000059 |
| C  | -0.255281 | 0.091625  | -0.000002 |
| N  | 0.497273  | -1.054999 | -0.000002 |
| H  | 0.119062  | -1.989941 | -0.000157 |
| H  | 2.598651  | -1.474154 | 0.000105  |
| H  | 2.826907  | 1.240876  | 0.000316  |
| H  | 0.279328  | 2.216282  | -0.000120 |
| Cl | -1.985858 | 0.004249  | -0.000072 |

## Statistical Thermodynamic Analysis

Temperature= 298.150 Kelvin Pressure= 1.00000 Atm  
 =====

```
SCF Energy= -667.806778526 Predicted Change= -1.160967D-07
MP2 Energy= -669.3529330346 MP2 Cor. Energy= -1.5461545
Zero-point correction (ZPE)= -669.6858 0.07325
Internal Energy (U)= -669.6807 0.07834
Enthalpy (H)= -669.6797 0.07929
Gibbs Free Energy (G)= -669.7147 0.04434
-----
```

Frequencies -- 216.0730 301.1781 423.1330

Supporting Information: **2radicalpyrrole.out**

-----  
 Using Gaussian 03: IA32L-G03RevC.02 12-Jun-2004  
 =====

#g3b3

#N Geom=AllCheck Guess=Read SCRF=Check B3LYP/6-31G(d) Freq  
 #N Geom=AllCheck Guess=Read SCRF=Check QCISD(T,E4T)/6-31G(d)  
 #N Geom=AllCheck Guess=Read SCRF=Check MP4/6-31+G(d)  
 #N Geom=AllCheck Guess=Read SCRF=Check MP4/6-31G(2df,p)  
 #N Geom=AllCheck Guess=Read SCRF=Check MP2=Full/GTLarge

-----  
 Pointgroup= C1 Stoichiometry= C4H4N(2) C1[X(C4H4N)] #Atoms= 9  
 Charge = 0 Multiplicity = 2  
 -----

SCF Energy= -208.222010948 Predicted Change= -3.258373D-07  
 MP2 Energy= -209.2230072961 Correl. Energy= -1.00099634  
 =====

Optimization completed. {Found 2 times}  
 Item Max Val. Criteria Pass? RMS Val. Criteria Pass?  
 Force 0.00015 || 0.00045 [ YES ] 0.00005 || 0.00030 [ YES ]  
 Displ 0.00135 || 0.00180 [ YES ] 0.00135 || 0.00180 [ YES ]  
 -----

Atomic Coordinates (Angstroms)  
 Type X Y Z  
 -----

|   |           |           |           |
|---|-----------|-----------|-----------|
| C | 0.689295  | 0.888307  | 0.000292  |
| C | -0.686953 | 0.928207  | -0.000087 |
| C | -1.181272 | -0.420438 | 0.000120  |
| C | -0.059285 | -1.204173 | -0.000113 |
| N | 1.070103  | -0.445440 | -0.000205 |
| H | 2.016289  | -0.792457 | -0.000397 |
| H | 1.427335  | 1.677582  | 0.000534  |
| H | -1.293411 | 1.824949  | -0.000138 |
| H | -2.211644 | -0.743412 | 0.000167  |

## Statistical Thermodynamic Analysis

Temperature= 298.150 Kelvin Pressure= 1.00000 Atm  
 =====

SCF Energy= -208.222010948 Predicted Change= -3.258373D-07  
 MP2 Energy= -209.2230072961 MP2 Cor. Energy= -1.00099634  
 Zero-point correction (ZPE)= -209.3976 0.06920  
 Internal Energy (U)= -209.3933 0.07345  
 Enthalpy (H)= -209.3924 0.07439  
 Gibbs Free Energy (G)= -209.4248 0.04198  
 -----

Frequencies -- 272.2405 443.9055 618.1263

Supporting Information: **3chloro2radicalpyrrole.out**

Using Gaussian 03: IA32L-G03RevC.02 12-Jun-2004

#g3b3

#N Geom=AllCheck Guess=Read SCRF=Check B3LYP/6-31G(d) Freq

#N Geom=AllCheck Guess=Read SCRF=Check QCISD(T,E4T)/6-31G(d)

#N Geom=AllCheck Guess=Read SCRF=Check MP4/6-31+G(d)

#N Geom=AllCheck Guess=Read SCRF=Check MP4/6-31G(2df,p)

#N Geom=AllCheck Guess=Read SCRF=Check MP2=Full/GTLarge

Pointgroup= C1 Stoichiometry= C4H3ClN(2) C1[X(C4H3ClN)] #Atoms= 9

Charge = 0 Multiplicity = 2

SCF Energy= -667.147861378 Predicted Change= -3.917708D-07

MP2 Energy= -668.63479321 Correl. Energy= -1.48693183

Optimization completed. {Found 1 times}

| Item  | Max Val. | Criteria | Pass?   | RMS Val. | Criteria | Pass?   |
|-------|----------|----------|---------|----------|----------|---------|
| Force | 0.00015  | 0.00045  | [ YES ] | 0.00005  | 0.00030  | [ YES ] |
| Displ | 0.00203  | 0.00180  | [ NO ]  | 0.00203  | 0.00180  | [ YES ] |

| Atomic Type | Coordinates (Angstroms) |   |   |
|-------------|-------------------------|---|---|
|             | X                       | Y | Z |

|    |           |           |           |
|----|-----------|-----------|-----------|
| C  | 1.859817  | 0.664361  | 0.000141  |
| C  | 0.557961  | 1.112701  | -0.000007 |
| C  | -0.293661 | -0.038115 | 0.000025  |
| C  | 0.537871  | -1.125342 | -0.000106 |
| N  | 1.836283  | -0.720428 | -0.000130 |
| H  | 2.640799  | -1.328031 | -0.000255 |
| H  | 2.794869  | 1.205574  | 0.000287  |
| H  | 0.227781  | 2.142340  | 0.000025  |
| Cl | -2.028786 | -0.038737 | 0.000031  |

## Statistical Thermodynamic Analysis

Temperature= 298.150 Kelvin Pressure= 1.00000 Atm

SCF Energy= -667.147861378 Predicted Change= -3.917708D-07

MP2 Energy= -668.63479321 MP2 Cor. Energy= -1.48693183

Zero-point correction (ZPE)= -668.9983 0.05955

Internal Energy (U)= -668.9935 0.06431

Enthalpy (H)= -668.9926 0.06526

Gibbs Free Energy (G)= -669.0276 0.03025

Frequencies -- -124.5801 296.4147 311.4581

Supporting Information: **3chloropyrrole.out**

-----  
 Using Gaussian 03: IA32L-G03RevC.02 12-Jun-2004  
 =====

```
#g3b3 scf=maxcyc=1000
#N Geom=AllCheck Guess=Read SCRF=Check B3LYP/6-31G(d) Freq
#N Geom=AllCheck Guess=Read SCRF=Check QCISD(T,E4T)/6-31G(d)
#N Geom=AllCheck Guess=Read SCRF=Check MP4/6-31+G(d)
#N Geom=AllCheck Guess=Read SCRF=Check MP4/6-31G(2df,p)
#N Geom=AllCheck Guess=Read SCRF=Check MP2=Full/GTLarge
```

-----  
 Pointgroup= C1 Stoichiometry= C4H4ClN C1[X(C4H4ClN)] #Atoms= 10  
 Charge = 0 Multiplicity = 1  
 -----

```
SCF Energy= -667.807326280 Predicted Change= -1.282250D-07
MP2 Energy= -669.3529460909 Correl. Energy= -1.54561981
=====
```

```
Optimization completed.      {Found      2      times}
Item  Max Val.  Criteria  Pass?  RMS Val.  Criteria  Pass?
Force  0.00012 || 0.00045 [ YES ]  0.00004 || 0.00030 [ YES ]
Displ  0.00084 || 0.00180 [ YES ]  0.00084 || 0.00180 [ YES ]
-----
```

| Atomic<br>Type | Coordinates (Angstroms) |   |   |
|----------------|-------------------------|---|---|
|                | X                       | Y | Z |

|    |           |           |           |
|----|-----------|-----------|-----------|
| C  | 1.845757  | 0.713331  | 0.000062  |
| C  | 0.543611  | 1.165227  | 0.000129  |
| C  | -0.282219 | 0.008336  | -0.000015 |
| C  | 0.521097  | -1.110679 | -0.000006 |
| N  | 1.820323  | -0.660374 | -0.000005 |
| H  | 2.633879  | -1.255822 | -0.000155 |
| H  | 2.779755  | 1.256031  | 0.000106  |
| H  | 0.213751  | 2.193915  | 0.000221  |
| H  | 0.272820  | -2.160741 | -0.000053 |
| Cl | -2.024232 | -0.004003 | -0.000065 |

## Statistical Thermodynamic Analysis

Temperature= 298.150 Kelvin Pressure= 1.00000 Atm  
 =====

```
SCF Energy= -667.807326280 Predicted Change= -1.282250D-07
MP2 Energy= -669.3529460909 MP2 Cor. Energy= -1.54561981
Zero-point correction (ZPE)= -669.6865 0.07335
Internal Energy (U)= -669.6814 0.07842
Enthalpy (H)= -669.6805 0.07936
Gibbs Free Energy (G)= -669.7154 0.04445
-----
```

Frequencies -- 238.8483 295.2668 441.3609



Supporting Information: **3radicalpyrrole.out**

-----  
 Using Gaussian 03: IA32L-G03RevC.02 12-Jun-2004  
 =====

#g3b3

#N Geom=AllCheck Guess=Read SCRF=Check B3LYP/6-31G(d) Freq  
 #N Geom=AllCheck Guess=Read SCRF=Check QCISD(T,E4T)/6-31G(d)  
 #N Geom=AllCheck Guess=Read SCRF=Check MP4/6-31+G(d)  
 #N Geom=AllCheck Guess=Read SCRF=Check MP4/6-31G(2df,p)  
 #N Geom=AllCheck Guess=Read SCRF=Check MP2=Full/GTLarge

-----  
 Pointgroup= C1 Stoichiometry= C4H4N(2) C1[X(C4H4N)] #Atoms= 9  
 Charge = 0 Multiplicity = 2  
 -----

SCF Energy= -208.222652598 Predicted Change= -1.797223D-07  
 MP2 Energy= -209.2238587532 Correl. Energy= -1.00120615  
 =====

Optimization completed. {Found 2 times}  
 Item Max Val. Criteria Pass? RMS Val. Criteria Pass?  
 Force 0.00011 || 0.00045 [ YES ] 0.00004 || 0.00030 [ YES ]  
 Displ 0.00118 || 0.00180 [ YES ] 0.00118 || 0.00180 [ YES ]  
 -----

Atomic Coordinates (Angstroms)  
 Type X Y Z  
 -----

|   |           |           |           |
|---|-----------|-----------|-----------|
| C | 0.675833  | 0.885827  | -0.000033 |
| C | 1.188218  | -0.401000 | -0.000070 |
| C | 0.056932  | -1.245770 | -0.000054 |
| C | -1.100116 | -0.514388 | 0.000083  |
| N | -0.696885 | 0.810269  | 0.000047  |
| H | -1.317532 | 1.605921  | 0.000161  |
| H | 1.179657  | 1.842587  | -0.000054 |
| H | 2.233449  | -0.675096 | -0.000143 |
| H | -2.142578 | -0.793311 | 0.000146  |

## Statistical Thermodynamic Analysis

Temperature= 298.150 Kelvin Pressure= 1.00000 Atm  
 =====

SCF Energy= -208.222652598 Predicted Change= -1.797223D-07  
 MP2 Energy= -209.2238587532 MP2 Cor. Energy= -1.00120615  
 Zero-point correction (ZPE)= -209.3981 0.06976  
 Internal Energy (U)= -209.3941 0.07380  
 Enthalpy (H)= -209.3932 0.07475  
 Gibbs Free Energy (G)= -209.4252 0.04274  
 -----

Frequencies -- 407.2522 537.5733 633.3533

Supporting Information: **4chloro2radicalpyrrole.out**

Using Gaussian 03: AM64L-G03RevC.02 12-Jun-2004

#g3b3 scf=maxcyc=1000

#N Geom=AllCheck Guess=Read SCRF=Check B3LYP/6-31G(d) Freq

#N Geom=AllCheck Guess=Read SCRF=Check QCISD(T,E4T)/6-31G(d)

#N Geom=AllCheck Guess=Read SCRF=Check MP4/6-31+G(d)

#N Geom=AllCheck Guess=Read SCRF=Check MP4/6-31G(2df,p)

#N Geom=AllCheck Guess=Read SCRF=Check MP2=Full/GTLarge

Pointgroup= C1 Stoichiometry= C4H3ClN(2) C1[X(C4H3ClN)] #Atoms= 9

Charge = 0 Multiplicity = 2

SCF Energy= -667.149588065 Predicted Change= -7.245162D-07

MP2 Energy= -668.6381116031 Correl. Energy= -1.48852353

Optimization completed. {Found 1 times}

| Item  | Max Val. | Criteria | Pass?   | RMS Val. | Criteria | Pass?   |
|-------|----------|----------|---------|----------|----------|---------|
| Force | 0.00024  | 0.00045  | [ YES ] | 0.00009  | 0.00030  | [ YES ] |
| Displ | 0.00241  | 0.00180  | [ NO ]  | 0.00241  | 0.00180  | [ YES ] |

| Atomic Type | Coordinates (Angstroms) |           |           |
|-------------|-------------------------|-----------|-----------|
|             | X                       | Y         | Z         |
| C           | 0.621677                | -1.062746 | -0.000075 |
| C           | -0.224649               | 0.022146  | -0.000008 |
| C           | 0.540022                | 1.234152  | 0.000044  |
| C           | 1.837759                | 0.800739  | 0.000175  |
| N           | 1.913088                | -0.554968 | 0.000144  |
| H           | 2.759613                | -1.102688 | 0.000261  |
| H           | 0.419145                | -2.122750 | -0.000198 |
| H           | 0.164216                | 2.245269  | 0.000047  |
| Cl          | -1.963732               | -0.064753 | -0.000114 |

## Statistical Thermodynamic Analysis

Temperature= 298.150 Kelvin Pressure= 1.00000 Atm

SCF Energy= -667.149588065 Predicted Change= -7.245162D-07

MP2 Energy= -668.6381116031 MP2 Cor. Energy= -1.48852353

Zero-point correction (ZPE)= -669.0007 0.05991

Internal Energy (U)= -668.9954 0.06525

Enthalpy (H)= -668.9944 0.06619

Gibbs Free Energy (G)= -669.0305 0.03014

Frequencies -- 211.5336 265.9687 297.4798

**Chlorooxazoles**Supporting Information: **2chloro\_oxazole.out**-----  
Using Gaussian 03: AM64L-G03RevC.02 12-Jun-2004  
=====

#g3b3

#N Geom=AllCheck Guess=Read SCRF=Check B3LYP/6-31G(d) Freq  
#N Geom=AllCheck Guess=Read SCRF=Check QCISD(T,E4T)/6-31G(d)  
#N Geom=AllCheck Guess=Read SCRF=Check MP4/6-31+G(d)  
#N Geom=AllCheck Guess=Read SCRF=Check MP4/6-31G(2df,p)  
#N Geom=AllCheck Guess=Read SCRF=Check MP2=Full/GTLarge  
-----Pointgroup= C1 Stoichiometry= C3H2ClNO C1[X(C3H2ClNO)] #Atoms= 8  
Charge = 0 Multiplicity = 1  
-----SCF Energy= -703.637770056 Predicted Change= -1.754474D-07  
MP2 Energy= -705.2427814841 Correl. Energy= -1.60501142  
=====Optimization completed. {Found 2 times}  
Item Max Val. Criteria Pass? RMS Val. Criteria Pass?  
Force 0.00013 || 0.00045 [ YES ] 0.00004 || 0.00030 [ YES ]  
Displ 0.00084 || 0.00180 [ YES ] 0.00084 || 0.00180 [ YES ]  
-----Atomic Coordinates (Angstroms)  
Type X Y Z  
-----

|    |           |           |           |
|----|-----------|-----------|-----------|
| C  | 1.781309  | -0.682708 | 0.000129  |
| C  | 1.813516  | 0.671307  | 0.000114  |
| C  | -0.215390 | 0.101833  | -0.000077 |
| H  | 2.511624  | -1.475422 | 0.000209  |
| H  | 2.666275  | 1.334577  | 0.000188  |
| N  | 0.511495  | 1.168277  | 0.000015  |
| O  | 0.459971  | -1.070651 | 0.000049  |
| Cl | -1.924397 | -0.000852 | -0.000111 |

-----  
Statistical Thermodynamic AnalysisTemperature= 298.150 Kelvin Pressure= 1.00000 Atm  
=====SCF Energy= -703.637770056 Predicted Change= -1.754474D-07  
MP2 Energy= -705.2427814841 MP2 Cor. Energy= -1.60501142  
Zero-point correction (ZPE)= -705.6103 0.04919  
Internal Energy (U)= -705.6058 0.05375  
Enthalpy (H)= -705.6048 0.05469  
Gibbs Free Energy (G)= -705.6389 0.02062  
-----

Frequencies -- 235.6880 330.4828 506.9651

Supporting Information: **2radical\_oxazole.out**


---

Using Gaussian 03: IA32L-G03RevC.02 12-Jun-2004

---

# g3b3

#N Geom=AllCheck Guess=Read SCRF=Check B3LYP/6-31G(d) Freq

#N Geom=AllCheck Guess=Read SCRF=Check QCISD(T,E4T)/6-31G(d)

#N Geom=AllCheck Guess=Read SCRF=Check MP4/6-31+G(d)

#N Geom=AllCheck Guess=Read SCRF=Check MP4/6-31G(2df,p)

#N Geom=AllCheck Guess=Read SCRF=Check MP2=Full/GTLarge

---

Pointgroup= C1 Stoichiometry= C3H2NO(2) C1[X(C3H2NO)] #Atoms= 7

Charge = 0 Multiplicity = 2

---

SCF Energy= -244.055689359 Predicted Change= -8.381489D-07

MP2 Energy= -245.1131518869 Correl. Energy= -1.05746252

---

Optimization completed. {Found 2 times}

| Item  | Max Val. | Criteria | Pass?   | RMS Val. | Criteria | Pass?   |
|-------|----------|----------|---------|----------|----------|---------|
| Force | 0.00031  | 0.00045  | [ YES ] | 0.00014  | 0.00030  | [ YES ] |
| Displ | 0.00120  | 0.00180  | [ YES ] | 0.00120  | 0.00180  | [ YES ] |

---

| Atomic<br>Type | Coordinates (Angstroms) |   |   |
|----------------|-------------------------|---|---|
|                | X                       | Y | Z |

---

|   |           |           |           |
|---|-----------|-----------|-----------|
| C | 0.689123  | 0.845006  | 0.000133  |
| C | -0.664983 | 0.888378  | 0.000025  |
| C | -0.111348 | -1.129720 | -0.000091 |
| H | 1.487564  | 1.569450  | 0.000235  |
| H | -1.325119 | 1.743592  | 0.000075  |
| N | -1.169288 | -0.426488 | 0.000057  |
| O | 1.068228  | -0.493702 | -0.000139 |

---

## Statistical Thermodynamic Analysis

Temperature= 298.150 Kelvin Pressure= 1.00000 Atm

---

SCF Energy= -244.055689359 Predicted Change= -8.381489D-07

MP2 Energy= -245.1131518869 MP2 Cor. Energy= -1.05746252

Zero-point correction (ZPE)= -245.3256 0.04559

Internal Energy (U)= -245.3221 0.04916

Enthalpy (H)= -245.3211 0.05011

Gibbs Free Energy (G)= -245.3524 0.01884

---

Frequencies -- 549.7043 607.9783 744.0671

Supporting Information: **4chloro\_oxazole.out**

-----  
 Using Gaussian 03: IA32L-G03RevC.02 12-Jun-2004  
 =====

# g3b3

#N Geom=AllCheck Guess=Read SCRF=Check B3LYP/6-31G(d) Freq

#N Geom=AllCheck Guess=Read SCRF=Check QCISD(T,E4T)/6-31G(d)

#N Geom=AllCheck Guess=Read SCRF=Check MP4/6-31+G(d)

#N Geom=AllCheck Guess=Read SCRF=Check MP4/6-31G(2df,p)

#N Geom=AllCheck Guess=Read SCRF=Check MP2=Full/GTLarge  
 -----

Pointgroup= C1 Stoichiometry= C3H2ClNO C1[X(C3H2ClNO)] #Atoms= 8

Charge = 0 Multiplicity = 1  
 -----

SCF Energy= -703.638244435 Predicted Change= -1.092722D-06

MP2 Energy= -705.2437210037 Correl. Energy= -1.60547656  
 =====

Optimization completed. {Found 2 times}

| Item  | Max Val. | Criteria | Pass?   | RMS Val. | Criteria | Pass?   |
|-------|----------|----------|---------|----------|----------|---------|
| Force | 0.00041  | 0.00045  | [ YES ] | 0.00015  | 0.00030  | [ YES ] |
| Displ | 0.00130  | 0.00180  | [ YES ] | 0.00130  | 0.00180  | [ YES ] |

-----

| Atomic Type | Coordinates (Angstroms) |   |   |
|-------------|-------------------------|---|---|
|             | X                       | Y | Z |

-----

|    |           |           |           |
|----|-----------|-----------|-----------|
| C  | -0.559319 | 1.102103  | -0.000037 |
| C  | 0.249676  | 0.010902  | -0.000018 |
| C  | -1.724577 | -0.711122 | 0.000072  |
| H  | -0.408639 | 2.168531  | -0.000091 |
| H  | -2.639142 | -1.285635 | 0.000165  |
| N  | -0.503742 | -1.145457 | 0.000104  |
| O  | -1.848806 | 0.639155  | 0.000054  |
| Cl | 1.974691  | -0.022896 | -0.000079 |

-----

## Statistical Thermodynamic Analysis

Temperature= 298.150 Kelvin Pressure= 1.00000 Atm  
 =====

SCF Energy= -703.638244435 Predicted Change= -1.092722D-06

MP2 Energy= -705.2437210037 MP2 Cor. Energy= -1.60547656

Zero-point correction (ZPE)= -705.6119 0.04932

Internal Energy (U)= -705.6073 0.05388

Enthalpy (H)= -705.6064 0.05483

Gibbs Free Energy (G)= -705.6405 0.02073  
 -----

Frequencies -- 255.8151 317.1649 488.6537

Supporting Information: **4radical\_oxazole.out**

-----  
 Using Gaussian 03: IA32L-G03RevC.02 12-Jun-2004  
 =====

# g3b3  
 #N Geom=AllCheck Guess=Read SCRF=Check B3LYP/6-31G(d) Freq  
 #N Geom=AllCheck Guess=Read SCRF=Check QCISD(T,E4T)/6-31G(d)  
 #N Geom=AllCheck Guess=Read SCRF=Check MP4/6-31+G(d)  
 #N Geom=AllCheck Guess=Read SCRF=Check MP4/6-31G(2df,p)  
 #N Geom=AllCheck Guess=Read SCRF=Check MP2=Full/GTLarge

-----  
 Pointgroup= C1 Stoichiometry= C3H2NO(2) C1[X(C3H2NO)] #Atoms= 7  
 Charge = 0 Multiplicity = 2  
 -----

SCF Energy= -244.055668760 Predicted Change= -3.429411D-07  
 MP2 Energy= -245.1105494011 Correl. Energy= -1.05488064  
 =====

Optimization completed. {Found 2 times}  
 Item Max Val. Criteria Pass? RMS Val. Criteria Pass?  
 Force 0.00013 || 0.00045 [ YES ] 0.00005 || 0.00030 [ YES ]  
 Displ 0.00121 || 0.00180 [ YES ] 0.00121 || 0.00180 [ YES ]  
 -----

Atomic Coordinates (Angstroms)  
 Type X Y Z  
 -----

|   |           |           |           |
|---|-----------|-----------|-----------|
| C | -1.155140 | 0.170105  | 0.000199  |
| C | -0.243000 | 1.168562  | 0.000075  |
| C | 0.867736  | -0.596356 | 0.000500  |
| H | -2.227519 | 0.081419  | 0.000172  |
| H | 1.626542  | -1.365163 | 0.000456  |
| N | 1.023452  | 0.696460  | -0.000140 |
| O | -0.422595 | -1.005668 | -0.000537 |

## Statistical Thermodynamic Analysis

Temperature= 298.150 Kelvin Pressure= 1.00000 Atm  
 =====

SCF Energy= -244.055668760 Predicted Change= -3.429411D-07  
 MP2 Energy= -245.1105494011 MP2 Cor. Energy= -1.05488064  
 Zero-point correction (ZPE)= -245.3267 0.04603  
 Internal Energy (U)= -245.3231 0.04955  
 Enthalpy (H)= -245.3222 0.05049  
 Gibbs Free Energy (G)= -245.3534 0.01931  
 -----

Frequencies -- 595.2682 657.6641 722.7893

Supporting Information: **Schlro\_oxazole.out**


---

Using Gaussian 03: IA32L-G03RevC.02 12-Jun-2004

---

# g3b3

#N Geom=AllCheck Guess=Read SCRF=Check B3LYP/6-31G(d) Freq

#N Geom=AllCheck Guess=Read SCRF=Check QCISD(T,E4T)/6-31G(d)

#N Geom=AllCheck Guess=Read SCRF=Check MP4/6-31+G(d)

#N Geom=AllCheck Guess=Read SCRF=Check MP4/6-31G(2df,p)

#N Geom=AllCheck Guess=Read SCRF=Check MP2=Full/GTLarge

---

Pointgroup= C1 Stoichiometry= C3H2ClNO C1[X(C3H2ClNO)] #Atoms= 8

Charge = 0 Multiplicity = 1

---

SCF Energy= -703.636334756 Predicted Change= -9.468255D-07

MP2 Energy= -705.2422300837 Correl. Energy= -1.60589532

---

Optimization completed. {Found 2 times}

| Item  | Max Val. | Criteria | Pass?   | RMS Val. | Criteria | Pass?   |
|-------|----------|----------|---------|----------|----------|---------|
| Force | 0.00037  | 0.00045  | [ YES ] | 0.00014  | 0.00030  | [ YES ] |
| Displ | 0.00165  | 0.00180  | [ YES ] | 0.00165  | 0.00180  | [ YES ] |

---

| Atomic Type | Coordinates (Angstroms) |   |   |
|-------------|-------------------------|---|---|
|             | X                       | Y | Z |

---

|    |           |           |           |
|----|-----------|-----------|-----------|
| C  | -0.241415 | 0.099157  | -0.000023 |
| C  | 0.625445  | 1.144259  | 0.000007  |
| C  | 1.770199  | -0.642525 | 0.000114  |
| H  | 0.411982  | 2.202422  | -0.000034 |
| H  | 2.525176  | -1.414820 | 0.000208  |
| N  | 1.921332  | 0.642052  | 0.000102  |
| O  | 0.473791  | -1.063679 | 0.000061  |
| Cl | -1.947187 | -0.022229 | -0.000116 |

---

## Statistical Thermodynamic Analysis

Temperature= 298.150 Kelvin Pressure= 1.00000 Atm

---

SCF Energy= -703.636334756 Predicted Change= -9.468255D-07

MP2 Energy= -705.2422300837 MP2 Cor. Energy= -1.60589532

Zero-point correction (ZPE)= -705.6098 0.04932

Internal Energy (U)= -705.6053 0.05390

Enthalpy (H)= -705.6043 0.05484

Gibbs Free Energy (G)= -705.6385 0.02070

---

Frequencies -- 232.0297 309.9803 495.3910

---

Supporting Information: **5radical\_oxazole.out**

-----  
 Using Gaussian 03: IA32L-G03RevC.02 12-Jun-2004  
 =====

# g3b3  
 #N Geom=AllCheck Guess=Read SCRF=Check B3LYP/6-31G(d) Freq  
 #N Geom=AllCheck Guess=Read SCRF=Check QCISD(T,E4T)/6-31G(d)  
 #N Geom=AllCheck Guess=Read SCRF=Check MP4/6-31+G(d)  
 #N Geom=AllCheck Guess=Read SCRF=Check MP4/6-31G(2df,p)  
 #N Geom=AllCheck Guess=Read SCRF=Check MP2=Full/GTLarge

-----  
 Pointgroup= C1 Stoichiometry= C3H2NO(2) C1[X(C3H2NO)] #Atoms= 7  
 Charge = 0 Multiplicity = 2  
 -----

SCF Energy= -244.053412253 Predicted Change= -3.135072D-07  
 MP2 Energy= -245.1056409349 Correl. Energy= -1.05222868  
 =====

Optimization completed. {Found 2 times}  
 Item Max Val. Criteria Pass? RMS Val. Criteria Pass?  
 Force 0.00019 || 0.00045 [ YES ] 0.00007 || 0.00030 [ YES ]  
 Displ 0.00065 || 0.00180 [ YES ] 0.00065 || 0.00180 [ YES ]  
 -----

Atomic Coordinates (Angstroms)  
 Type X Y Z  
 -----

|   |           |           |           |
|---|-----------|-----------|-----------|
| C | 0.316136  | -1.127376 | 0.000098  |
| C | 1.188454  | -0.090275 | 0.000079  |
| C | -0.810280 | 0.675298  | -0.000022 |
| H | 2.266363  | -0.083149 | 0.000126  |
| H | -1.714644 | 1.265457  | -0.000104 |
| N | 0.421462  | 1.077612  | -0.000102 |
| O | -0.958476 | -0.683935 | -0.000029 |

## Statistical Thermodynamic Analysis

Temperature= 298.150 Kelvin Pressure= 1.00000 Atm  
 =====

SCF Energy= -244.053412253 Predicted Change= -3.135072D-07  
 MP2 Energy= -245.1056409349 MP2 Cor. Energy= -1.05222868  
 Zero-point correction (ZPE)= -245.3224 0.04578  
 Internal Energy (U)= -245.3189 0.04932  
 Enthalpy (H)= -245.3179 0.05026  
 Gibbs Free Energy (G)= -245.3492 0.01904  
 -----

Frequencies -- 528.3367 663.3048 790.2237



**Chlorothiazoles**

Supporting Information: 24dichlorothiazole.out

-----  
Using Gaussian 03: IA32L-G03RevC.02 12-Jun-2004  
=====

#g3b3 scf=maxcyc=1000

#N Geom=AllCheck Guess=Read SCRF=Check B3LYP/6-31G(d) Freq

#N Geom=AllCheck Guess=Read SCRF=Check QCISD(T,E4T)/6-31G(d)

#N Geom=AllCheck Guess=Read SCRF=Check MP4/6-31+G(d)

#N Geom=AllCheck Guess=Read SCRF=Check MP4/6-31G(2df,p)

#N Geom=AllCheck Guess=Read SCRF=Check MP2=Full/GTLarge  
-----

Pointgroup= C1 Stoichiometry= C3HCl2NS C1[X(C3HCl2NS)] #Atoms= 8

Charge = 0 Multiplicity = 1  
-----

SCF Energy= -1485.22755157 Predicted Change= -2.616958D-07

MP2 Energy= -1487.525191342 Correl. Energy= -2.29763976  
=====

Optimization completed. {Found 2 times}

Item Max Val. Criteria Pass? RMS Val. Criteria Pass?

Force 0.00015 || 0.00045 [ YES ] 0.00004 || 0.00030 [ YES ]

Displ 0.00154 || 0.00180 [ YES ] 0.00154 || 0.00180 [ YES ]  
-----

Atomic Coordinates (Angstroms)

Type X Y Z  
-----

|    |           |           |           |
|----|-----------|-----------|-----------|
| C  | 0.899072  | 1.322739  | 0.000243  |
| C  | 1.182142  | -0.011710 | 0.000571  |
| C  | -0.983299 | -0.207108 | 0.000851  |
| H  | 1.583068  | 2.158749  | -0.000111 |
| N  | 0.121327  | -0.879565 | 0.000401  |
| S  | -0.825075 | 1.537218  | -0.000394 |
| Cl | -2.547007 | -0.940468 | -0.000674 |
| Cl | 2.792969  | -0.660756 | 0.000298  |

-----  
Statistical Thermodynamic AnalysisTemperature= 298.150 Kelvin Pressure= 1.00000 Atm  
=====

SCF Energy= -1485.22755157 Predicted Change= -2.616958D-07

MP2 Energy= -1487.525191342 MP2 Cor. Energy= -2.29763976

Zero-point correction (ZPE)= -1488.1935 0.03627

Internal Energy (U)= -1488.1873 0.04246

Enthalpy (H)= -1488.1863 0.04341

Gibbs Free Energy (G)= -1488.2252 0.00454  
-----

Frequencies -- 169.7593 197.6051 243.7779

Supporting Information: **25dichlorothiazole.out**

-----  
 Using Gaussian 03: IA32L-G03RevC.02 12-Jun-2004  
 =====

```
#g3b3 scf=maxcyc=1000
#N Geom=AllCheck Guess=Read SCRF=Check B3LYP/6-31G(d) Freq
#N Geom=AllCheck Guess=Read SCRF=Check QCISD(T,E4T)/6-31G(d)
#N Geom=AllCheck Guess=Read SCRF=Check MP4/6-31+G(d)
#N Geom=AllCheck Guess=Read SCRF=Check MP4/6-31G(2df,p)
#N Geom=AllCheck Guess=Read SCRF=Check MP2=Full/GTLarge
```

-----  
 Pointgroup= C1 Stoichiometry= C3HCl2NS C1[X(C3HCl2NS)] #Atoms= 8  
 Charge = 0 Multiplicity = 1  
 -----

```
SCF Energy= -1485.22242387 Predicted Change= -1.103800D-07
MP2 Energy= -1487.520366111 Correl. Energy= -2.29794224
```

-----  
 Optimization completed. {Found 2 times}  
 Item Max Val. Criteria Pass? RMS Val. Criteria Pass?  
 Force 0.00005 || 0.00045 [ YES ] 0.00002 || 0.00030 [ YES ]  
 Displ 0.00107 || 0.00180 [ YES ] 0.00107 || 0.00180 [ YES ]  
 -----

| Atomic<br>Type | Coordinates (Angstroms) |   |   |
|----------------|-------------------------|---|---|
|                | X                       | Y | Z |

|    |           |           |           |
|----|-----------|-----------|-----------|
| C  | -1.215729 | 0.183970  | 0.000207  |
| C  | -0.633985 | 1.417870  | 0.000111  |
| C  | 1.201665  | 0.215968  | 0.000661  |
| H  | -1.172662 | 2.357370  | -0.000226 |
| N  | 0.743329  | 1.422266  | -0.000069 |
| S  | 0.005684  | -1.069939 | 0.000121  |
| Cl | 2.886985  | -0.173369 | -0.000237 |
| Cl | -2.900708 | -0.185517 | -0.000180 |

## Statistical Thermodynamic Analysis

Temperature= 298.150 Kelvin Pressure= 1.00000 Atm  
 -----

```
SCF Energy= -1485.22242387 Predicted Change= -1.103800D-07
MP2 Energy= -1487.520366111 MP2 Cor. Energy= -2.29794224
Zero-point correction (ZPE)= -1488.1892 0.03648
Internal Energy (U)= -1488.1829 0.04274
Enthalpy (H)= -1488.1820 0.04368
Gibbs Free Energy (G)= -1488.2210 0.00470
```

-----  
 Frequencies -- 115.0769 194.3316 300.1956  
 -----

Supporting Information: **2chloro4radicalthiazole.out**


---

Using Gaussian 03: AM64L-G03RevC.02 12-Jun-2004

---

```
#g3b3 scf=maxcyc=1000
#N Geom=AllCheck Guess=Read SCRF=Check B3LYP/6-31G(d) Freq
#N Geom=AllCheck Guess=Read SCRF=Check QCISD(T,E4T)/6-31G(d)
#N Geom=AllCheck Guess=Read SCRF=Check MP4/6-31+G(d)
#N Geom=AllCheck Guess=Read SCRF=Check MP4/6-31G(2df,p)
#N Geom=AllCheck Guess=Read SCRF=Check MP2=Full/GTLarge
```

---

Pointgroup= C1 Stoichiometry= C3HCINS(2) C1[X(C3HCINS)] #Atoms= 7
Charge = 0 Multiplicity = 2

---

```
SCF Energy= -1025.65153359 Predicted Change= -9.103936D-08
MP2 Energy= -1027.389553829 Correl. Energy= -1.73802024
```

---

```
Optimization completed.      {Found      2      times}
Item  Max Val.  Criteria  Pass?  RMS Val.  Criteria  Pass?
Force  0.00012 || 0.00045 [ YES ]   0.00004 || 0.00030 [ YES ]
Displ  0.00100 || 0.00180 [ YES ]   0.00100 || 0.00180 [ YES ]
```

---

```
Atomic      Coordinates (Angstroms)
Type        X          Y          Z
```

---

```
C      2.066380   0.025188   0.000446
C      1.512790   1.257855   0.000041
C     -0.373279   0.229367  -0.000491
H      3.097523  -0.295213   0.000886
N      0.182462   1.406939  -0.000244
S      0.735140  -1.128822  -0.000170
Cl     -2.080726  -0.033334   0.000210
```

---

## Statistical Thermodynamic Analysis

```
Temperature= 298.150 Kelvin Pressure= 1.00000 Atm
```

---

```
SCF Energy= -1025.65153359 Predicted Change= -9.103936D-08
MP2 Energy= -1027.389553829 MP2 Cor. Energy= -1.73802024
Zero-point correction (ZPE)= -1027.9145 0.03311
Internal Energy (U)= -1027.9095 0.03812
Enthalpy (H)= -1027.9085 0.03906
Gibbs Free Energy (G)= -1027.9446 0.00301
```

---

```
Frequencies -- 219.7998          274.8980          447.5167
```

Supporting Information: **2chloro5radicalthiazole.out**

-----  
 Using Gaussian 03: AM64L-G03RevC.02 12-Jun-2004  
 =====

```
#g3b3 scf=maxcyc=1000
#N Geom=AllCheck Guess=Read SCRF=Check B3LYP/6-31G(d) Freq
#N Geom=AllCheck Guess=Read SCRF=Check QCISD(T,E4T)/6-31G(d)
#N Geom=AllCheck Guess=Read SCRF=Check MP4/6-31+G(d)
#N Geom=AllCheck Guess=Read SCRF=Check MP4/6-31G(2df,p)
#N Geom=AllCheck Guess=Read SCRF=Check MP2=Full/GTLarge
```

-----  
 Pointgroup= C1 Stoichiometry= C3HCINS(2) C1[X(C3HCINS)] #Atoms= 7  
 Charge = 0 Multiplicity = 2  
 -----

```
SCF Energy= -1025.64734344 Predicted Change= -1.407318D-07
MP2 Energy= -1027.382629523 Correl. Energy= -1.73528608
=====
```

```
Optimization completed.      {Found      2      times}
Item  Max Val.  Criteria  Pass?  RMS Val.  Criteria  Pass?
Force  0.00014 || 0.00045 [ YES ]  0.00004 || 0.00030 [ YES ]
Displ  0.00050 || 0.00180 [ YES ]  0.00050 || 0.00180 [ YES ]
-----
```

| Atomic Type | Coordinates (Angstroms) |           |           |  |
|-------------|-------------------------|-----------|-----------|--|
|             | X                       | Y         | Z         |  |
| C           | -2.016678               | -0.172196 | 0.000014  |  |
| C           | -1.673283               | 1.136268  | 0.000372  |  |
| C           | 0.338353                | 0.208084  | -0.000153 |  |
| H           | -2.334914               | 1.992100  | 0.000428  |  |
| N           | -0.296265               | 1.334462  | 0.000174  |  |
| S           | -0.659792               | -1.244354 | 0.000025  |  |
| Cl          | 2.063240                | 0.090788  | -0.000203 |  |

-----

## Statistical Thermodynamic Analysis

Temperature= 298.150 Kelvin Pressure= 1.00000 Atm  
 =====

```
SCF Energy= -1025.64734344 Predicted Change= -1.407318D-07
MP2 Energy= -1027.382629523 MP2 Cor. Energy= -1.73528608
Zero-point correction (ZPE)= -1027.9077 0.03332
Internal Energy (U)= -1027.9027 0.03833
Enthalpy (H)= -1027.9018 0.03928
Gibbs Free Energy (G)= -1027.9379 0.00318
-----
```

Frequencies -- 221.0438 271.8020 445.8031

Supporting Information: **2chlorothiazole.out**

-----  
 Using Gaussian 03: IA32L-G03RevC.02 12-Jun-2004  
 =====

# g3b3

#N Geom=AllCheck Guess=Read SCRF=Check B3LYP/6-31G(d) Freq

#N Geom=AllCheck Guess=Read SCRF=Check QCISD(T,E4T)/6-31G(d)

#N Geom=AllCheck Guess=Read SCRF=Check MP4/6-31+G(d)

#N Geom=AllCheck Guess=Read SCRF=Check MP4/6-31G(2df,p)

#N Geom=AllCheck Guess=Read SCRF=Check MP2=Full/GTLarge  
 -----

Pointgroup= C1 Stoichiometry= C3H2CINS C1[X(C3H2CINS)] #Atoms= 8

Charge = 0 Multiplicity = 1  
 -----

SCF Energy= -1026.30167632 Predicted Change= -2.282916D-07

MP2 Energy= -1028.10810521 Correl. Energy= -1.80642888  
 =====

Optimization completed. {Found 2 times}

| Item  | Max Val. | Criteria | Pass?   | RMS Val. | Criteria | Pass?   |
|-------|----------|----------|---------|----------|----------|---------|
| Force | 0.00008  | 0.00045  | [ YES ] | 0.00002  | 0.00030  | [ YES ] |
| Displ | 0.00116  | 0.00180  | [ YES ] | 0.00116  | 0.00180  | [ YES ] |

-----

| Atomic Type | Coordinates (Angstroms) |           |           |  |
|-------------|-------------------------|-----------|-----------|--|
|             | X                       | Y         | Z         |  |
| C           | -2.003482               | -0.134251 | 0.000345  |  |
| C           | -1.578891               | 1.161560  | -0.000472 |  |
| C           | 0.394754                | 0.217656  | -0.000280 |  |
| H           | -3.015202               | -0.515862 | 0.000720  |  |
| H           | -2.228078               | 2.029280  | -0.000502 |  |
| N           | -0.213294               | 1.356759  | 0.000406  |  |
| S           | -0.633650               | -1.204009 | -0.000075 |  |
| Cl          | 2.117674                | 0.046096  | 0.000034  |  |

-----

## Statistical Thermodynamic Analysis

Temperature= 298.150 Kelvin Pressure= 1.00000 Atm  
 =====

SCF Energy= -1026.30167632 Predicted Change= -2.282916D-07

MP2 Energy= -1028.10810521 MP2 Cor. Energy= -1.80642888

Zero-point correction (ZPE)= -1028.5923 0.04590

Internal Energy (U)= -1028.5872 0.05091

Enthalpy (H)= -1028.5863 0.05186

Gibbs Free Energy (G)= -1028.6218 0.01641  
 -----

Frequencies -- 220.5146 274.9304 446.6063

Supporting Information: **2radicalthiazole.out**

-----  
 Using Gaussian 03: IA32L-G03RevC.02 12-Jun-2004  
 =====

#g3b3

#N Geom=AllCheck Guess=Read SCRF=Check B3LYP/6-31G(d) Freq  
 #N Geom=AllCheck Guess=Read SCRF=Check QCISD(T,E4T)/6-31G(d)  
 #N Geom=AllCheck Guess=Read SCRF=Check MP4/6-31+G(d)  
 #N Geom=AllCheck Guess=Read SCRF=Check MP4/6-31G(2df,p)  
 #N Geom=AllCheck Guess=Read SCRF=Check MP2=Full/GTLarge

-----  
 Pointgroup= C1 Stoichiometry= C3H2NS(2) C1[X(C3H2NS)] #Atoms= 7  
 Charge = 0 Multiplicity = 2  
 -----

SCF Energy= -566.728532799 Predicted Change= -3.454890D-07  
 MP2 Energy= -567.9822653753 Correl. Energy= -1.25373257  
 =====

Optimization completed. {Found 2 times}  
 Item Max Val. Criteria Pass? RMS Val. Criteria Pass?  
 Force 0.00021 || 0.00045 [ YES ] 0.00006 || 0.00030 [ YES ]  
 Displ 0.00083 || 0.00180 [ YES ] 0.00083 || 0.00180 [ YES ]  
 -----

Atomic Coordinates (Angstroms)  
 Type X Y Z  
 -----

|   |           |           |           |
|---|-----------|-----------|-----------|
| C | -0.071943 | 1.178247  | -0.000014 |
| C | -1.288884 | 0.566975  | -0.000248 |
| C | -0.052079 | -1.249180 | -0.000305 |
| H | 0.151630  | 2.236687  | 0.000290  |
| H | -2.251294 | 1.063834  | -0.000005 |
| N | -1.237139 | -0.826027 | 0.000340  |
| S | 1.202317  | -0.030912 | 0.000046  |

## Statistical Thermodynamic Analysis

Temperature= 298.150 Kelvin Pressure= 1.00000 Atm  
 =====

SCF Energy= -566.728532799 Predicted Change= -3.454890D-07  
 MP2 Energy= -567.9822653753 MP2 Cor. Energy= -1.25373257  
 Zero-point correction (ZPE)= -568.3181 0.04263  
 Internal Energy (U)= -568.3141 0.04660  
 Enthalpy (H)= -568.3132 0.04755  
 Gibbs Free Energy (G)= -568.3459 0.01485  
 -----

Frequencies -- 438.5656 551.9343 570.0781

Supporting Information: **45dichlorothiazole.out**

-----  
 Using Gaussian 03: AM64L-G03RevC.02 12-Jun-2004  
 =====

```
#g3b3 scf=maxcyc=1000
#N Geom=AllCheck Guess=Read SCRF=Check B3LYP/6-31G(d) Freq
#N Geom=AllCheck Guess=Read SCRF=Check QCISD(T,E4T)/6-31G(d)
#N Geom=AllCheck Guess=Read SCRF=Check MP4/6-31+G(d)
#N Geom=AllCheck Guess=Read SCRF=Check MP4/6-31G(2df,p)
#N Geom=AllCheck Guess=Read SCRF=Check MP2=Full/GTLarge
```

-----  
 Pointgroup= C1 Stoichiometry= C3HCl2NS C1[X(C3HCl2NS)] #Atoms= 8  
 Charge = 0 Multiplicity = 1  
 -----

```
SCF Energy= -1485.22215434 Predicted Change= -3.124820D-08
MP2 Energy= -1487.521629366 Correl. Energy= -2.29947502
=====
```

```
Optimization completed.      {Found      2      times}
Item  Max Val.  Criteria  Pass?  RMS Val.  Criteria  Pass?
Force  0.00006 || 0.00045 [ YES ]  0.00002 || 0.00030 [ YES ]
Displ  0.00017 || 0.00180 [ YES ]  0.00017 || 0.00180 [ YES ]
-----
```

```
Atomic      Coordinates (Angstroms)
Type        X          Y          Z
-----
```

```
 C   -0.243577   0.503555   0.000028
  C    0.466428  -0.669384   0.000052
  C   -1.542684  -1.545656   0.000031
  N   -0.271822  -1.819960  -0.000036
  S   -1.952118   0.151433  -0.000012
  Cl   2.193962  -0.767228  -0.000007
  H   -2.320578  -2.300113  -0.000023
  Cl   0.357581   2.113453  -0.000005
-----
```

## Statistical Thermodynamic Analysis

Temperature= 298.150 Kelvin Pressure= 1.00000 Atm  
 =====

```
SCF Energy= -1485.22215434 Predicted Change= -3.124820D-08
MP2 Energy= -1487.521629366 MP2 Cor. Energy= -2.29947502
Zero-point correction (ZPE)= -1488.1888 0.03651
Internal Energy (U)= -1488.1826 0.04270
Enthalpy (H)= -1488.1817 0.04365
Gibbs Free Energy (G)= -1488.2205 0.00478
-----
```

```
Frequencies -- 156.3477      174.9657      255.6263
```

Supporting Information: **4chloro2radicalthiazole.out**

Using Gaussian 03: IA32L-G03RevC.02 12-Jun-2004

#g3b3 scf=maxcyc=1000

#N Geom=AllCheck Guess=Read SCRF=Check B3LYP/6-31G(d) Freq

#N Geom=AllCheck Guess=Read SCRF=Check QCISD(T,E4T)/6-31G(d)

#N Geom=AllCheck Guess=Read SCRF=Check MP4/6-31+G(d)

#N Geom=AllCheck Guess=Read SCRF=Check MP4/6-31G(2df,p)

#N Geom=AllCheck Guess=Read SCRF=Check MP2=Full/GTLarge

Pointgroup= C1 Stoichiometry= C3HCINS(2) C1[X(C3HCINS)] #Atoms= 7

Charge = 0 Multiplicity = 2

SCF Energy= -1025.65500254 Predicted Change= -3.959396D-08

MP2 Energy= -1027.39720608 Correl. Energy= -1.74220353

Optimization completed. {Found 2 times}

| Item  | Max Val. | Criteria | Pass?   | RMS Val. | Criteria | Pass?   |
|-------|----------|----------|---------|----------|----------|---------|
| Force | 0.00008  | 0.00045  | [ YES ] | 0.00002  | 0.00030  | [ YES ] |
| Displ | 0.00023  | 0.00180  | [ YES ] | 0.00023  | 0.00180  | [ YES ] |

| Atomic Type | Coordinates (Angstroms) |   |   |
|-------------|-------------------------|---|---|
|             | X                       | Y | Z |

|    |           |           |           |
|----|-----------|-----------|-----------|
| C  | 0.337604  | -1.012113 | 0.000121  |
| C  | -0.538511 | 0.032124  | 0.000127  |
| C  | 1.288462  | 1.215210  | 0.000082  |
| H  | 0.122483  | -2.071109 | 0.000079  |
| N  | 0.030090  | 1.295720  | -0.000028 |
| S  | 1.977069  | -0.387595 | -0.000069 |
| Cl | -2.264209 | -0.129926 | -0.000044 |

## Statistical Thermodynamic Analysis

Temperature= 298.150 Kelvin Pressure= 1.00000 Atm

SCF Energy= -1025.65500254 Predicted Change= -3.959396D-08

MP2 Energy= -1027.39720608 MP2 Cor. Energy= -1.74220353

Zero-point correction (ZPE)= -1027.9191 0.03317

Internal Energy (U)= -1027.9141 0.03821

Enthalpy (H)= -1027.9131 0.03916

Gibbs Free Energy (G)= -1027.9493 0.00303

Frequencies -- 208.0239 300.0381 431.8788



Supporting Information: **4chloro5radicalthiazole.out**


---

Using Gaussian 03: AM64L-G03RevC.02 12-Jun-2004

---

```
#g3b3 scf=maxcyc=1000
#N Geom=AllCheck Guess=Read SCRF=Check B3LYP/6-31G(d) Freq
#N Geom=AllCheck Guess=Read SCRF=Check QCISD(T,E4T)/6-31G(d)
#N Geom=AllCheck Guess=Read SCRF=Check MP4/6-31+G(d)
#N Geom=AllCheck Guess=Read SCRF=Check MP4/6-31G(2df,p)
#N Geom=AllCheck Guess=Read SCRF=Check MP2=Full/GTLarge
```

---

```
Pointgroup= C1  Stoichiometry= C3HCINS(2)  C1[X(C3HCINS)]  #Atoms= 7
Charge = 0  Multiplicity = 2
```

---

```
SCF Energy= -1025.64755274  Predicted Change= -9.143191D-07
MP2 Energy= -1027.380315068  Correl. Energy= -1.73276232
```

---

```
Optimization completed.      {Found      2      times}
Item  Max Val.  Criteria  Pass?  RMS Val.  Criteria  Pass?
Force  0.00043 || 0.00045 [ YES ]   0.00013 || 0.00030 [ YES ]
Displ  0.00133 || 0.00180 [ YES ]   0.00133 || 0.00180 [ YES ]
```

---

```
Atomic      Coordinates (Angstroms)
Type        X          Y          Z
```

---

```
C      0.290926  -1.049445  0.000044
C     -0.581693  -0.012808  -0.000211
C      1.318134   1.111213  0.000094
N      0.019419   1.224640  -0.000074
S      1.933889  -0.531301  -0.000002
Cl     -2.307851  -0.136826  0.000047
H      1.991100   1.960625  0.000184
```

---

## Statistical Thermodynamic Analysis

```
Temperature= 298.150 Kelvin  Pressure= 1.00000 Atm
```

---

```
SCF Energy=  -1025.64755274 Predicted Change= -9.143191D-07
MP2 Energy=  -1027.380315068  MP2 Cor. Energy= -1.73276232
Zero-point correction (ZPE)=    -1027.9063  0.03334
Internal Energy (U)=              -1027.9013  0.03835
Enthalpy (H)=                    -1027.9003  0.03929
Gibbs Free Energy (G)=            -1027.9365  0.00316
```

---

```
Frequencies --  186.6087          293.4536          435.2187
```

Supporting Information: **4radicalthiazole.out**

-----  
 Using Gaussian 03: IA32L-G03RevC.02 12-Jun-2004  
 =====

#g3b3

#N Geom=AllCheck Guess=Read SCRF=Check B3LYP/6-31G(d) Freq  
 #N Geom=AllCheck Guess=Read SCRF=Check QCISD(T,E4T)/6-31G(d)  
 #N Geom=AllCheck Guess=Read SCRF=Check MP4/6-31+G(d)  
 #N Geom=AllCheck Guess=Read SCRF=Check MP4/6-31G(2df,p)  
 #N Geom=AllCheck Guess=Read SCRF=Check MP2=Full/GTLarge

-----  
 Pointgroup= C1 Stoichiometry= C3H2NS(2) C1[X(C3H2NS)] #Atoms= 7  
 Charge = 0 Multiplicity = 2  
 -----

SCF Energy= -566.726385406 Predicted Change= -9.780919D-08  
 MP2 Energy= -567.9742116424 Correl. Energy= -1.24782623  
 =====

Optimization completed. {Found 2 times}  
 Item Max Val. Criteria Pass? RMS Val. Criteria Pass?  
 Force 0.00017 || 0.00045 [ YES ] 0.00005 || 0.00030 [ YES ]  
 Displ 0.00039 || 0.00180 [ YES ] 0.00039 || 0.00180 [ YES ]  
 -----

Atomic Coordinates (Angstroms)  
 Type X Y Z

-----  

|   |           |           |           |
|---|-----------|-----------|-----------|
| C | 0.195576  | 1.261923  | 0.000196  |
| C | -1.113554 | 0.916081  | 0.000030  |
| C | -0.389729 | -1.120394 | 0.000001  |
| H | 0.677719  | 2.227700  | 0.000259  |
| N | -1.465547 | -0.372322 | -0.000012 |
| S | 1.114256  | -0.235178 | -0.000094 |
| H | -0.400751 | -2.204263 | -0.000028 |

 -----

## Statistical Thermodynamic Analysis

Temperature= 298.150 Kelvin Pressure= 1.00000 Atm  
 =====

SCF Energy= -566.726385406 Predicted Change= -9.780919D-08  
 MP2 Energy= -567.9742116424 MP2 Cor. Energy= -1.24782623  
 Zero-point correction (ZPE)= -568.3141 0.04256  
 Internal Energy (U)= -568.3102 0.04646  
 Enthalpy (H)= -568.3093 0.04741  
 Gibbs Free Energy (G)= -568.3418 0.01483  
 -----

Frequencies -- 458.7138 596.3008 613.0396

Supporting Information: **Schloro2radicalthiazole.out**

-----  
 Using Gaussian 03: IA32L-G03RevC.02 12-Jun-2004  
 =====

```
#g3b3 scf=maxcyc=1000
#N Geom=AllCheck Guess=Read SCRF=Check B3LYP/6-31G(d) Freq
#N Geom=AllCheck Guess=Read SCRF=Check QCISD(T,E4T)/6-31G(d)
#N Geom=AllCheck Guess=Read SCRF=Check MP4/6-31+G(d)
#N Geom=AllCheck Guess=Read SCRF=Check MP4/6-31G(2df,p)
#N Geom=AllCheck Guess=Read SCRF=Check MP2=Full/GTLarge
```

-----  
 Pointgroup= C1 Stoichiometry= C3HCINS(2) C1[X(C3HCINS)] #Atoms= 7  
 Charge = 0 Multiplicity = 2  
 -----

```
SCF Energy= -1025.65053307 Predicted Change= -5.856086D-08
MP2 Energy= -1027.39216893 Correl. Energy= -1.74163586
=====
```

```
Optimization completed.      {Found      2      times}
Item  Max Val.  Criteria  Pass?  RMS Val.  Criteria  Pass?
Force  0.00010 || 0.00045 [ YES ]  0.00003 || 0.00030 [ YES ]
Displ  0.00044 || 0.00180 [ YES ]  0.00044 || 0.00180 [ YES ]
-----
```

```
Atomic      Coordinates (Angstroms)
Type       X          Y          Z
-----
```

```
C      0.367923   0.190757  -0.000076
C     -0.360682   1.343253   0.000097
C     -2.034702  -0.093791  -0.000175
H      0.038790   2.349109   0.000231
N     -1.734343   1.127927   0.000004
S     -0.698850  -1.219538   0.000069
Cl     2.085175   0.036865  -0.000026
-----
```

## Statistical Thermodynamic Analysis

Temperature= 298.150 Kelvin Pressure= 1.00000 Atm  
 =====

```
SCF Energy= -1025.65053307 Predicted Change= -5.856086D-08
MP2 Energy= -1027.39216893 MP2 Cor. Energy= -1.74163586
Zero-point correction (ZPE)= -1027.9165 0.03336
Internal Energy (U)= -1027.9114 0.03844
Enthalpy (H)= -1027.9104 0.03939
Gibbs Free Energy (G)= -1027.9467 0.00315
-----
```

```
Frequencies -- 226.4584      254.4814      432.6347
```

Supporting Information: **Schloro4radicalthiazole.out**

-----  
 Using Gaussian 03: AM64L-G03RevC.02 12-Jun-2004  
 =====

```
#g3b3 scf=maxcyc=1000
#N Geom=AllCheck Guess=Read SCRF=Check B3LYP/6-31G(d) Freq
#N Geom=AllCheck Guess=Read SCRF=Check QCISD(T,E4T)/6-31G(d)
#N Geom=AllCheck Guess=Read SCRF=Check MP4/6-31+G(d)
#N Geom=AllCheck Guess=Read SCRF=Check MP4/6-31G(2df,p)
#N Geom=AllCheck Guess=Read SCRF=Check MP2=Full/GTLarge
```

-----  
 Pointgroup= C1 Stoichiometry= C3HCINS(2) C1[X(C3HCINS)] #Atoms= 7  
 Charge = 0 Multiplicity = 2  
 -----

```
SCF Energy= -1025.64670899 Predicted Change= -1.108616D-07
MP2 Energy= -1027.38033859 Correl. Energy= -1.7336296
```

-----  
 Optimization completed. {Found 2 times}  
 Item Max Val. Criteria Pass? RMS Val. Criteria Pass?  
 Force 0.00014 || 0.00045 [ YES ] 0.00004 || 0.00030 [ YES ]  
 Displ 0.00059 || 0.00180 [ YES ] 0.00059 || 0.00180 [ YES ]  
 -----

| Atomic Type | Coordinates (Angstroms) |   |   |
|-------------|-------------------------|---|---|
|             | X                       | Y | Z |

|    |           |           |           |
|----|-----------|-----------|-----------|
| C  | -0.434001 | 0.233275  | -0.000370 |
| C  | 0.334795  | 1.348727  | -0.000058 |
| C  | 1.997559  | -0.043244 | 0.000175  |
| N  | 1.659682  | 1.222651  | 0.000009  |
| S  | 0.653721  | -1.158320 | -0.000056 |
| H  | 3.020296  | -0.402574 | 0.000498  |
| Cl | -2.146337 | 0.067328  | 0.000109  |

## Statistical Thermodynamic Analysis

Temperature= 298.150 Kelvin Pressure= 1.00000 Atm  
 -----

```
SCF Energy= -1025.64670899 Predicted Change= -1.108616D-07
MP2 Energy= -1027.38033859 MP2 Cor. Energy= -1.7336296
Zero-point correction (ZPE)= -1027.9092 0.03334
Internal Energy (U)= -1027.9042 0.03836
Enthalpy (H)= -1027.9033 0.03931
Gibbs Free Energy (G)= -1027.9394 0.00317
```

-----  
 Frequencies -- 213.9936 256.8915 442.0250  
 -----

Supporting Information: **Schlorthiazole.out**

-----  
 Using Gaussian 03: IA32L-G03RevC.02 12-Jun-2004  
 =====

# g3b3

#N Geom=AllCheck Guess=Read SCRF=Check B3LYP/6-31G(d) Freq

#N Geom=AllCheck Guess=Read SCRF=Check QCISD(T,E4T)/6-31G(d)

#N Geom=AllCheck Guess=Read SCRF=Check MP4/6-31+G(d)

#N Geom=AllCheck Guess=Read SCRF=Check MP4/6-31G(2df,p)

#N Geom=AllCheck Guess=Read SCRF=Check MP2=Full/GTLarge  
 -----

Pointgroup= C1 Stoichiometry= C3H2CINS C1[X(C3H2CINS)] #Atoms= 8

Charge = 0 Multiplicity = 1  
 -----

SCF Energy= -1026.29729251 Predicted Change= -1.497737D-07

MP2 Energy= -1028.103925566 Correl. Energy= -1.80663306  
 =====

Optimization completed. {Found 2 times}

| Item  | Max Val. | Criteria | Pass?   | RMS Val. | Criteria | Pass?   |
|-------|----------|----------|---------|----------|----------|---------|
| Force | 0.00008  | 0.00045  | [ YES ] | 0.00003  | 0.00030  | [ YES ] |
| Displ | 0.00086  | 0.00180  | [ YES ] | 0.00086  | 0.00180  | [ YES ] |

-----

| Atomic Type | Coordinates (Angstroms) |           |           |  |
|-------------|-------------------------|-----------|-----------|--|
|             | X                       | Y         | Z         |  |
| C           | -0.414997               | 0.184201  | 0.000040  |  |
| C           | 0.310317                | 1.342093  | 0.000217  |  |
| C           | 1.992876                | -0.081567 | 0.000388  |  |
| H           | -0.117104               | 2.337540  | 0.000123  |  |
| N           | 1.675137                | 1.178960  | -0.000311 |  |
| S           | 0.646108                | -1.200165 | -0.000019 |  |
| H           | 3.011507                | -0.452399 | 0.000376  |  |
| Cl          | -2.134546               | 0.023319  | -0.000112 |  |

-----

## Statistical Thermodynamic Analysis

Temperature= 298.150 Kelvin Pressure= 1.00000 Atm  
 =====

SCF Energy= -1026.29729251 Predicted Change= -1.497737D-07

MP2 Energy= -1028.103925566 MP2 Cor. Energy= -1.80663306

Zero-point correction (ZPE)= -1028.5886 0.04603

Internal Energy (U)= -1028.5836 0.05107

Enthalpy (H)= -1028.5827 0.05201

Gibbs Free Energy (G)= -1028.6182 0.01648  
 -----

Frequencies -- 220.3272 258.0534 437.1280

Supporting Information: **5radicalthiazole.out**

-----  
 Using Gaussian 03: IA32L-G03RevC.02 12-Jun-2004  
 =====

#g3b3

#N Geom=AllCheck Guess=Read SCRF=Check B3LYP/6-31G(d) Freq  
 #N Geom=AllCheck Guess=Read SCRF=Check QCISD(T,E4T)/6-31G(d)  
 #N Geom=AllCheck Guess=Read SCRF=Check MP4/6-31+G(d)  
 #N Geom=AllCheck Guess=Read SCRF=Check MP4/6-31G(2df,p)  
 #N Geom=AllCheck Guess=Read SCRF=Check MP2=Full/GTLarge

-----  
 Pointgroup= C1 Stoichiometry= C3H2NS(2) C1[X(C3H2NS)] #Atoms= 7  
 Charge = 0 Multiplicity = 2  
 -----

SCF Energy= -566.721677526 Predicted Change= -1.399916D-07  
 MP2 Energy= -567.9661038013 Correl. Energy= -1.24442627  
 =====

Optimization completed. {Found 2 times}  
 Item Max Val. Criteria Pass? RMS Val. Criteria Pass?  
 Force 0.00015 || 0.00045 [ YES ] 0.00005 || 0.00030 [ YES ]  
 Displ 0.00061 || 0.00180 [ YES ] 0.00061 || 0.00180 [ YES ]  
 -----

Atomic Coordinates (Angstroms)  
 Type X Y Z  
 -----

|   |           |           |           |
|---|-----------|-----------|-----------|
| C | -0.125118 | -1.237281 | -0.000063 |
| C | -1.332679 | -0.622443 | 0.000076  |
| C | 0.011513  | 1.152479  | 0.000139  |
| H | -2.307343 | -1.092305 | -0.000124 |
| N | -1.230946 | 0.761406  | -0.000062 |
| S | 1.205404  | -0.136696 | -0.000031 |
| H | 0.315206  | 2.193068  | 0.000143  |

## Statistical Thermodynamic Analysis

Temperature= 298.150 Kelvin Pressure= 1.00000 Atm  
 =====

SCF Energy= -566.721677526 Predicted Change= -1.399916D-07  
 MP2 Energy= -567.9661038013 MP2 Cor. Energy= -1.24442627  
 Zero-point correction (ZPE)= -568.3064 0.04273  
 Internal Energy (U)= -568.3025 0.04664  
 Enthalpy (H)= -568.3016 0.04759  
 Gibbs Free Energy (G)= -568.3342 0.01497  
 -----

Frequencies -- 416.6415 581.9989 591.3524

**Chlorothiophenes**Supporting Information: **235trichlorothiophene.out**-----  
Using Gaussian 03: IA32L-G03RevC.02 12-Jun-2004  
=====

#g3b3

#N Geom=AllCheck Guess=Read SCRF=Check B3LYP/6-31G(d) Freq  
#N Geom=AllCheck Guess=Read SCRF=Check QCISD(T,E4T)/6-31G(d)  
#N Geom=AllCheck Guess=Read SCRF=Check MP4/6-31+G(d)  
#N Geom=AllCheck Guess=Read SCRF=Check MP4/6-31G(2df,p)  
#N Geom=AllCheck Guess=Read SCRF=Check MP2=Full/GTLarge-----  
Pointgroup= C1 Stoichiometry= C4HCl3S C1[X(C4HCl3S)] #Atoms= 9  
Charge = 0 Multiplicity = 1  
-----SCF Energy= -1928.14301545 Predicted Change= -1.461893D-07  
MP2 Energy= -1930.895830481 Correl. Energy= -2.75281503  
=====Optimization completed. {Found 2 times}  
Item Max Val. Criteria Pass? RMS Val. Criteria Pass?  
Force 0.00013 || 0.00045 [ YES ] 0.00004 || 0.00030 [ YES ]  
Displ 0.00076 || 0.00180 [ YES ] 0.00076 || 0.00180 [ YES ]  
-----Atomic Coordinates (Angstroms)  
Type X Y Z-----  
C 1.546562 0.169044 -0.000044  
C 0.674571 1.215961 0.000056  
C -0.685710 0.771076 0.000058  
C -0.813743 -0.591511 -0.000023  
S 0.746037 -1.383220 0.000161  
H 0.965839 2.258302 0.000059  
Cl -2.264330 -1.517523 -0.000093  
Cl -2.021805 1.878035 0.000070  
Cl 3.272458 0.256300 -0.000149  
-----

Statistical Thermodynamic Analysis

Temperature= 298.150 Kelvin Pressure= 1.00000 Atm  
=====SCF Energy= -1928.14301545 Predicted Change= -1.461893D-07  
MP2 Energy= -1930.895830481 MP2 Cor. Energy= -2.75281503  
Zero-point correction (ZPE)= -1931.7325 0.03866  
Internal Energy (U)= -1931.7247 0.04638  
Enthalpy (H)= -1931.7238 0.04732  
Gibbs Free Energy (G)= -1931.7665 0.00458  
-----

Frequencies -- 115.2525 169.8338 171.3710

Supporting Information: **23dichlorothiophene.out**


---

Using Gaussian 03: IA32L-G03RevC.02 12-Jun-2004

---

```
#g3b3 scf=maxcyc=1000
#N Geom=AllCheck Guess=Read SCRF=Check B3LYP/6-31G(d) Freq
#N Geom=AllCheck Guess=Read SCRF=Check QCISD(T,E4T)/6-31G(d)
#N Geom=AllCheck Guess=Read SCRF=Check MP4/6-31+G(d)
#N Geom=AllCheck Guess=Read SCRF=Check MP4/6-31G(2df,p)
#N Geom=AllCheck Guess=Read SCRF=Check MP2=Full/GTLarge
```

---

Pointgroup= C1 Stoichiometry= C4H2Cl2S C1[X(C4H2Cl2S)] #Atoms= 9
Charge = 0 Multiplicity = 1

---

```
SCF Energy= -1469.22150678 Predicted Change= -1.110649D-09
MP2 Energy= -1471.482402178 Correl. Energy= -2.2608954
```

---

```
Optimization completed.      {Found      2      times}
Item  Max Val.  Criteria  Pass?  RMS Val.  Criteria  Pass?
Force  0.00000 || 0.00045 [ YES ]  0.00000 || 0.00030 [ YES ]
Displ  0.00011 || 0.00180 [ YES ]  0.00011 || 0.00180 [ YES ]
```

---

```
Atomic      Coordinates (Angstroms)
Type        X          Y          Z
```

---

```
C      1.719616  -1.470573  0.000016
C      0.401923  -1.820846  0.000015
C     -0.463858  -0.682798 -0.000004
C      0.214821  0.507578  0.000005
S      1.940172  0.252978  0.000107
H      2.583269  -2.121622  0.000002
H      0.036351  -2.840498 -0.000012
Cl     -0.445831  2.098492 -0.000041
Cl     -2.195191  -0.821179 -0.000070
```

---

## Statistical Thermodynamic Analysis

```
Temperature= 298.150 Kelvin Pressure= 1.00000 Atm
```

---

```
SCF Energy= -1469.22150678 Predicted Change= -1.110649D-09
MP2 Energy= -1471.482402178 MP2 Cor. Energy= -2.2608954
Zero-point correction (ZPE)= -1472.1350 0.04815
Internal Energy (U)= -1472.1286 0.05457
Enthalpy (H)= -1472.1276 0.05551
Gibbs Free Energy (G)= -1472.1668 0.01630
```

---

```
Frequencies -- 158.6812      173.4121      239.1591
```



Supporting Information: **24dichlorothiophene.out**

-----  
 Using Gaussian 03: IA32L-G03RevC.02 12-Jun-2004  
 =====

```
#g3b3 scf=maxcyc=1000
#N Geom=AllCheck Guess=Read SCRF=Check B3LYP/6-31G(d) Freq
#N Geom=AllCheck Guess=Read SCRF=Check QCISD(T,E4T)/6-31G(d)
#N Geom=AllCheck Guess=Read SCRF=Check MP4/6-31+G(d)
#N Geom=AllCheck Guess=Read SCRF=Check MP4/6-31G(2df,p)
#N Geom=AllCheck Guess=Read SCRF=Check MP2=Full/GTLarge
```

-----  
 Pointgroup= C1 Stoichiometry= C4H2Cl2S C1[X(C4H2Cl2S)] #Atoms= 9  
 Charge = 0 Multiplicity = 1  
 -----

```
SCF Energy= -1469.22304594 Predicted Change= -4.119261D-10
MP2 Energy= -1471.482220632 Correl. Energy= -2.25917469
=====
```

```
Optimization completed.      {Found 2 times}
Item  Max Val.  Criteria  Pass?  RMS Val.  Criteria  Pass?
Force  0.00000 || 0.00045 [ YES ]  0.00000 || 0.00030 [ YES ]
Displ  0.00003 || 0.00180 [ YES ]  0.00003 || 0.00180 [ YES ]
-----
```

| Atomic Type | Coordinates (Angstroms) |   |   |  |
|-------------|-------------------------|---|---|--|
|             | X                       | Y | Z |  |

|    |           |           |           |
|----|-----------|-----------|-----------|
| C  | -0.916800 | 1.297318  | 0.000007  |
| C  | -1.239227 | -0.028462 | -0.000002 |
| C  | -0.115773 | -0.912109 | 0.000002  |
| C  | 1.055266  | -0.211183 | 0.000000  |
| S  | 0.807246  | 1.515228  | -0.000003 |
| H  | -1.582537 | 2.148486  | 0.000013  |
| H  | -0.186273 | -1.991969 | 0.000003  |
| Cl | 2.655367  | -0.868418 | 0.000001  |
| Cl | -2.881715 | -0.618261 | -0.000001 |

## Statistical Thermodynamic Analysis

Temperature= 298.150 Kelvin Pressure= 1.00000 Atm  
 =====

```
SCF Energy= -1469.22304594 Predicted Change= -4.119261D-10
MP2 Energy= -1471.482220632 MP2 Cor. Energy= -2.25917469
Zero-point correction (ZPE)= -1472.1366 0.04805
Internal Energy (U)= -1472.1301 0.05448
Enthalpy (H)= -1472.1292 0.05542
Gibbs Free Energy (G)= -1472.1685 0.01613
-----
```

Frequencies -- 158.9394 187.3103 244.5124

Supporting Information: **2chloro3radicalthiophene.out**


---

Using Gaussian 03: IA32L-G03RevC.02 12-Jun-2004

---

```
# g3b3 scf=maxcyc=1000
#N Geom=AllCheck Guess=Read SCRF=Check B3LYP/6-31G(d) Freq
#N Geom=AllCheck Guess=Read SCRF=Check QCISD(T,E4T)/6-31G(d)
#N Geom=AllCheck Guess=Read SCRF=Check MP4/6-31+G(d)
#N Geom=AllCheck Guess=Read SCRF=Check MP4/6-31G(2df,p)
#N Geom=AllCheck Guess=Read SCRF=Check MP2=Full/GTLarge
```

---

Pointgroup= C1 Stoichiometry= C4H2ClS(2) C1[X(C4H2ClS)] #Atoms= 8
Charge = 0 Multiplicity = 2

---

```
SCF Energy= -1009.64609758 Predicted Change= -3.743368D-09
MP2 Energy= -1011.341990069 Correl. Energy= -1.69589248
```

---

```
Optimization completed.      {Found      2      times}
Item  Max Val.  Criteria  Pass?  RMS Val.  Criteria  Pass?
Force  0.00001 || 0.00045 [ YES ]   0.00000 || 0.00030 [ YES ]
Displ  0.00010 || 0.00180 [ YES ]   0.00010 || 0.00180 [ YES ]
```

---

```
Atomic      Coordinates (Angstroms)
Type       X          Y          Z
```

---

```
C   -2.023968   -0.166733   0.000029
C   -1.725848    1.170562  -0.000023
C   -0.321743    1.357984  -0.000031
C    0.445469    0.249815  -0.000006
S   -0.599807   -1.170825  -0.000001
H   -3.001099   -0.633107   0.000065
H   -2.463069    1.964166  -0.000028
Cl    2.165742    0.101904   0.000010
```

---

## Statistical Thermodynamic Analysis

```
Temperature= 298.150 Kelvin   Pressure= 1.00000 Atm
```

---

```
SCF Energy=  -1009.64609758 Predicted Change= -3.743368D-09
MP2 Energy=  -1011.341990069   MP2 Cor. Energy= -1.69589248
Zero-point correction (ZPE)=    -1011.8532  0.04491
Internal Energy (U)=              -1011.8480  0.05014
Enthalpy (H)=                    -1011.8470  0.05109
Gibbs Free Energy (G)=            -1011.8835  0.01459
```

---

```
Frequencies --  191.1143          254.1043          432.8525
```

Supporting Information: **2chloro4radicalthiophene.out**


---

Using Gaussian 03: IA32L-G03RevC.02 12-Jun-2004

---

```
# g3b3 scf=maxcyc=1000
#N Geom=AllCheck Guess=Read SCRF=Check B3LYP/6-31G(d) Freq
#N Geom=AllCheck Guess=Read SCRF=Check QCISD(T,E4T)/6-31G(d)
#N Geom=AllCheck Guess=Read SCRF=Check MP4/6-31+G(d)
#N Geom=AllCheck Guess=Read SCRF=Check MP4/6-31G(2df,p)
#N Geom=AllCheck Guess=Read SCRF=Check MP2=Full/GTLarge
```

---

Pointgroup= C1 Stoichiometry= C4H2ClS(2) C1[X(C4H2ClS)] #Atoms= 8
Charge = 0 Multiplicity = 2

---

```
SCF Energy= -1009.64766342 Predicted Change= -1.165885D-07
MP2 Energy= -1011.34472146 Correl. Energy= -1.69705804
```

---

```
Optimization completed.      {Found      2      times}
Item  Max Val.  Criteria  Pass?  RMS Val.  Criteria  Pass?
Force  0.00012 || 0.00045 [ YES ]  0.00003 || 0.00030 [ YES ]
Displ  0.00054 || 0.00180 [ YES ]  0.00054 || 0.00180 [ YES ]
```

---

```
Atomic      Coordinates (Angstroms)
Type        X          Y          Z
```

---

```
C      2.098518  -0.044982  0.000032
C      1.643530  1.221697  0.000007
C      0.244014  1.437762 -0.000011
C     -0.392288  0.223927  0.000017
S      0.709732 -1.132541 -0.000061
H      3.102258 -0.445609  0.000040
H     -0.260372  2.395307 -0.000010
Cl     -2.103543 -0.050557  0.000040
```

---

## Statistical Thermodynamic Analysis

```
Temperature= 298.150 Kelvin Pressure= 1.00000 Atm
```

---

```
SCF Energy= -1009.64766342 Predicted Change= -1.165885D-07
MP2 Energy= -1011.34472146 MP2 Cor. Energy= -1.69705804
Zero-point correction (ZPE)= -1011.8559 0.04472
Internal Energy (U)= -1011.8506 0.04996
Enthalpy (H)= -1011.8497 0.05091
Gibbs Free Energy (G)= -1011.8862 0.01445
```

---

```
Frequencies -- 207.4305          260.7109          430.1883
```

Supporting Information: **2chlorothiophene.out**

-----  
 Using Gaussian 03: IA32L-G03RevC.02 12-Jun-2004  
 =====

```
#g3b3 scf=maxcyc=1000
#N Geom=AllCheck Guess=Read SCRF=Check B3LYP/6-31G(d) Freq
#N Geom=AllCheck Guess=Read SCRF=Check QCISD(T,E4T)/6-31G(d)
#N Geom=AllCheck Guess=Read SCRF=Check MP4/6-31+G(d)
#N Geom=AllCheck Guess=Read SCRF=Check MP4/6-31G(2df,p)
#N Geom=AllCheck Guess=Read SCRF=Check MP2=Full/GTLarge
```

-----  
 Pointgroup= C1 Stoichiometry= C4H3ClS C1[X(C4H3ClS)] #Atoms= 9  
 Charge = 0 Multiplicity = 1  
 -----

```
SCF Energy= -1010.29637297 Predicted Change= -2.024341D-07
MP2 Energy= -1012.064966053 Correl. Energy= -1.76859308
=====
```

```
Optimization completed.      {Found      2      times}
Item  Max Val.  Criteria  Pass?  RMS Val.  Criteria  Pass?
Force  0.00011 || 0.00045 [ YES ]  0.00004 || 0.00030 [ YES ]
Displ  0.00144 || 0.00180 [ YES ]  0.00144 || 0.00180 [ YES ]
-----
```

| Atomic Type | Coordinates (Angstroms) |           |           |  |
|-------------|-------------------------|-----------|-----------|--|
|             | X                       | Y         | Z         |  |
| C           | -2.021288               | -0.204049 | 0.000078  |  |
| C           | -1.703945               | 1.124893  | -0.000043 |  |
| C           | -0.295489               | 1.367784  | 0.000002  |  |
| C           | 0.421625                | 0.204668  | 0.000013  |  |
| S           | -0.601420               | -1.207547 | -0.000032 |  |
| H           | -3.001259               | -0.662113 | 0.000125  |  |
| H           | -2.447065               | 1.914896  | -0.000077 |  |
| H           | 0.162997                | 2.349556  | -0.000017 |  |
| Cl          | 2.147213                | 0.044626  | 0.000010  |  |

-----

## Statistical Thermodynamic Analysis

Temperature= 298.150 Kelvin Pressure= 1.00000 Atm  
 =====

```
SCF Energy= -1010.29637297 Predicted Change= -2.024341D-07
MP2 Energy= -1012.064966053 MP2 Cor. Energy= -1.76859308
Zero-point correction (ZPE)= -1012.5346 0.05756
Internal Energy (U)= -1012.5294 0.06277
Enthalpy (H)= -1012.5284 0.06372
Gibbs Free Energy (G)= -1012.5642 0.02792
-----
```

```
Frequencies -- 210.0654      260.3533      434.7617
```

Supporting Information: **2radical35dichlorothiophene.out**

-----  
 Using Gaussian 03: AM64L-G03RevC.02 12-Jun-2004  
 =====

#g3b3

#N Geom=AllCheck Guess=Read SCRF=Check B3LYP/6-31G(d) Freq  
 #N Geom=AllCheck Guess=Read SCRF=Check QCISD(T,E4T)/6-31G(d)  
 #N Geom=AllCheck Guess=Read SCRF=Check MP4/6-31+G(d)  
 #N Geom=AllCheck Guess=Read SCRF=Check MP4/6-31G(2df,p)  
 #N Geom=AllCheck Guess=Read SCRF=Check MP2=Full/GTLarge

-----  
 Pointgroup= C1 Stoichiometry= C4HCl2S(2) C1[X(C4HCl2S)] #Atoms= 8  
 Charge = 0 Multiplicity = 2  
 -----

SCF Energy= -1468.57032663 Predicted Change= -6.608251D-08  
 MP2 Energy= -1470.757248311 Correl. Energy= -2.18692168  
 =====

Optimization completed. {Found 2 times}  
 Item Max Val. Criteria Pass? RMS Val. Criteria Pass?  
 Force 0.00007 || 0.00045 [ YES ] 0.00002 || 0.00030 [ YES ]  
 Displ 0.00042 || 0.00180 [ YES ] 0.00042 || 0.00180 [ YES ]  
 -----

Atomic Coordinates (Angstroms)  
 Type X Y Z  
 -----

|    |           |           |           |
|----|-----------|-----------|-----------|
| C  | 1.420973  | -1.759700 | 0.000078  |
| C  | 0.080682  | -1.918906 | 0.000031  |
| C  | -0.553828 | -0.621775 | -0.000049 |
| C  | 0.329342  | 0.425326  | 0.000128  |
| S  | 1.998414  | -0.142347 | -0.000197 |
| H  | -0.464877 | -2.853946 | 0.000072  |
| Cl | -0.023527 | 2.110398  | 0.000219  |
| Cl | -2.280753 | -0.440878 | -0.000104 |

## Statistical Thermodynamic Analysis

Temperature= 298.150 Kelvin Pressure= 1.00000 Atm  
 =====

SCF Energy= -1468.57032663 Predicted Change= -6.608251D-08  
 MP2 Energy= -1470.757248311 MP2 Cor. Energy= -2.18692168  
 Zero-point correction (ZPE)= -1471.4518 0.03541  
 Internal Energy (U)= -1471.4453 0.04191  
 Enthalpy (H)= -1471.4444 0.04285  
 Gibbs Free Energy (G)= -1471.4844 0.00278  
 -----

Frequencies -- 155.1115 173.7482 195.9047

Supporting Information: **2radicalthiophene.out**

-----  
 Using Gaussian 03: IA32L-G03RevC.02 12-Jun-2004  
 =====

```
# g3b3 scf=maxcyc=1000
#N Geom=AllCheck Guess=Read SCRF=Check B3LYP/6-31G(d) Freq
#N Geom=AllCheck Guess=Read SCRF=Check QCISD(T,E4T)/6-31G(d)
#N Geom=AllCheck Guess=Read SCRF=Check MP4/6-31+G(d)
#N Geom=AllCheck Guess=Read SCRF=Check MP4/6-31G(2df,p)
#N Geom=AllCheck Guess=Read SCRF=Check MP2=Full/GTLLarge
```

-----  
 Pointgroup= C1 Stoichiometry= C4H3S(2) C1[X(C4H3S)] #Atoms= 8  
 Charge = 0 Multiplicity = 2  
 -----

```
SCF Energy= -550.721537665 Predicted Change= -5.264263D-07
MP2 Energy= -551.9295600698 Correl. Energy= -1.2080224
=====
```

```
Optimization completed.      {Found      2      times}
Item  Max Val.  Criteria  Pass?  RMS Val.  Criteria  Pass?
Force  0.00017 || 0.00045 [ YES ]   0.00007 || 0.00030 [ YES ]
Displ  0.00171 || 0.00180 [ YES ]   0.00171 || 0.00180 [ YES ]
-----
```

| Atomic<br>Type | Coordinates (Angstroms) |   |   |
|----------------|-------------------------|---|---|
|                | X                       | Y | Z |

|   |           |           |           |
|---|-----------|-----------|-----------|
| C | 0.042255  | 1.188659  | 0.000178  |
| C | -1.238468 | 0.711277  | -0.000025 |
| C | -1.317436 | -0.728277 | 0.000160  |
| C | -0.068767 | -1.253720 | 0.000180  |
| S | 1.216888  | -0.111448 | -0.000211 |
| H | 0.377785  | 2.217443  | 0.000234  |
| H | -2.113116 | 1.354117  | -0.000080 |
| H | -2.240385 | -1.296018 | 0.000257  |

## Statistical Thermodynamic Analysis

Temperature= 298.150 Kelvin Pressure= 1.00000 Atm  
 =====

```
SCF Energy= -550.721537665 Predicted Change= -5.264263D-07
MP2 Energy= -551.9295600698 MP2 Cor. Energy= -1.2080224
Zero-point correction (ZPE)= -552.2522 0.05407
Internal Energy (U)= -552.2480 0.05821
Enthalpy (H)= -552.2471 0.05915
Gibbs Free Energy (G)= -552.2801 0.02618
-----
```

Frequencies -- 364.4340 515.7536 605.7443

Supporting Information: **3chloro2radicalthiophene.out**

-----  
 Using Gaussian 03: IA32L-G03RevC.02 12-Jun-2004  
 =====

```
# g3b3 scf=maxcyc=1000
#N Geom=AllCheck Guess=Read SCRF=Check B3LYP/6-31G(d) Freq
#N Geom=AllCheck Guess=Read SCRF=Check QCISD(T,E4T)/6-31G(d)
#N Geom=AllCheck Guess=Read SCRF=Check MP4/6-31+G(d)
#N Geom=AllCheck Guess=Read SCRF=Check MP4/6-31G(2df,p)
#N Geom=AllCheck Guess=Read SCRF=Check MP2=Full/GTLarge
```

-----  
 Pointgroup= C1 Stoichiometry= C4H2ClS(2) C1[X(C4H2ClS)] #Atoms= 8  
 Charge = 0 Multiplicity = 2  
 -----

```
SCF Energy= -1009.64753337 Predicted Change= -5.211523D-08
MP2 Energy= -1011.342710605 Correl. Energy= -1.69517723
=====
```

```
Optimization completed.      {Found      2      times}
Item  Max Val.  Criteria  Pass?  RMS Val.  Criteria  Pass?
Force  0.00006 || 0.00045 [ YES ]  0.00002 || 0.00030 [ YES ]
Displ  0.00061 || 0.00180 [ YES ]  0.00061 || 0.00180 [ YES ]
-----
```

| Atomic Type | Coordinates (Angstroms) |   |   |
|-------------|-------------------------|---|---|
|             | X                       | Y | Z |

|    |           |           |           |
|----|-----------|-----------|-----------|
| C  | 1.444432  | 1.104816  | 0.000078  |
| C  | 0.087351  | 1.251990  | -0.000057 |
| C  | -0.604463 | -0.010198 | 0.000047  |
| C  | 0.272076  | -1.042819 | 0.000041  |
| S  | 1.925030  | -0.580598 | -0.000208 |
| H  | 2.202282  | 1.877294  | 0.000129  |
| H  | -0.426246 | 2.206756  | -0.000078 |
| Cl | -2.339582 | -0.153954 | 0.000155  |

## Statistical Thermodynamic Analysis

Temperature= 298.150 Kelvin Pressure= 1.00000 Atm  
 =====

```
SCF Energy= -1009.64753337 Predicted Change= -5.211523D-08
MP2 Energy= -1011.342710605 MP2 Cor. Energy= -1.69517723
Zero-point correction (ZPE)= -1011.8521 0.04483
Internal Energy (U)= -1011.8469 0.05012
Enthalpy (H)= -1011.8459 0.05106
Gibbs Free Energy (G)= -1011.8826 0.01440
-----
```

Frequencies -- 163.6146 276.1845 402.3759

Supporting Information: **3chlorothiophene.out**

-----  
 Using Gaussian 03: IA32L-G03RevC.02 12-Jun-2004  
 =====

```
#g3b3 scf=maxcyc=1000
#N Geom=AllCheck Guess=Read SCRF=Check B3LYP/6-31G(d) Freq
#N Geom=AllCheck Guess=Read SCRF=Check QCISD(T,E4T)/6-31G(d)
#N Geom=AllCheck Guess=Read SCRF=Check MP4/6-31+G(d)
#N Geom=AllCheck Guess=Read SCRF=Check MP4/6-31G(2df,p)
#N Geom=AllCheck Guess=Read SCRF=Check MP2=Full/GTLarge
```

-----  
 Pointgroup= C1 Stoichiometry= C4H3ClS C1[X(C4H3ClS)] #Atoms= 9  
 Charge = 0 Multiplicity = 1  
 -----

```
SCF Energy= -1010.30089557 Predicted Change= -1.421990D-07
MP2 Energy= -1012.068449978 Correl. Energy= -1.7675544
=====
```

```
Optimization completed.      {Found      2      times}
Item  Max Val.  Criteria  Pass?  RMS Val.  Criteria  Pass?
Force  0.00009 || 0.00045 [ YES ]  0.00003 || 0.00030 [ YES ]
Displ  0.00140 || 0.00180 [ YES ]  0.00140 || 0.00180 [ YES ]
-----
```

| Atomic<br>Type | Coordinates (Angstroms) |   |   |
|----------------|-------------------------|---|---|
|                | X                       | Y | Z |

|    |           |           |           |
|----|-----------|-----------|-----------|
| C  | -1.444962 | 1.136062  | 0.000169  |
| C  | -0.088121 | 1.287865  | -0.000107 |
| C  | 0.583567  | 0.026563  | 0.000056  |
| C  | -0.253939 | -1.052363 | 0.000109  |
| S  | -1.909540 | -0.536785 | -0.000082 |
| H  | -2.202276 | 1.908238  | 0.000237  |
| H  | 0.425058  | 2.241814  | -0.000223 |
| H  | 0.006960  | -2.100757 | 0.000152  |
| Cl | 2.326096  | -0.108794 | -0.000013 |

## Statistical Thermodynamic Analysis

Temperature= 298.150 Kelvin Pressure= 1.00000 Atm  
 =====

```
SCF Energy= -1010.30089557 Predicted Change= -1.421990D-07
MP2 Energy= -1012.068449978 MP2 Cor. Energy= -1.7675544
Zero-point correction (ZPE)= -1012.5386 0.05752
Internal Energy (U)= -1012.5334 0.06272
Enthalpy (H)= -1012.5324 0.06366
Gibbs Free Energy (G)= -1012.5682 0.02789
-----
```

Frequencies -- 210.5953            284.1955            423.3272



Supporting Information: **3radicalthiophene.out**

-----  
 Using Gaussian 03: IA32L-G03RevC.02 12-Jun-2004  
 =====

```
# g3b3 scf=maxcyc=1000
#N Geom=AllCheck Guess=Read SCRF=Check B3LYP/6-31G(d) Freq
#N Geom=AllCheck Guess=Read SCRF=Check QCISD(T,E4T)/6-31G(d)
#N Geom=AllCheck Guess=Read SCRF=Check MP4/6-31+G(d)
#N Geom=AllCheck Guess=Read SCRF=Check MP4/6-31G(2df,p)
#N Geom=AllCheck Guess=Read SCRF=Check MP2=Full/GTLarge
```

-----  
 Pointgroup= C1 Stoichiometry= C4H3S(2) C1[X(C4H3S)] #Atoms= 8  
 Charge = 0 Multiplicity = 2  
 -----

```
SCF Energy= -550.723724783 Predicted Change= -6.583170D-07
MP2 Energy= -551.9333149071 Correl. Energy= -1.20959012
=====
```

```
Optimization completed.      {Found      2      times}
Item  Max Val.  Criteria  Pass?  RMS Val.  Criteria  Pass?
Force  0.00025 || 0.00045 [ YES ]  0.00009 || 0.00030 [ YES ]
Displ  0.00130 || 0.00180 [ YES ]  0.00130 || 0.00180 [ YES ]
-----
```

```
Atomic      Coordinates (Angstroms)
Type        X          Y          Z
-----
```

```
 C   -0.439594   -1.131287   0.000269
  C   -1.489189   -0.248745  -0.000068
  C   -0.999037    1.081198  -0.000003
  C    0.336834    1.260956   0.000274
  S    1.101298   -0.323955  -0.000217
  H   -0.476216   -2.213265   0.000430
  H   -2.533323   -0.537113  -0.000140
  H    0.934690    2.160933   0.000341
-----
```

## Statistical Thermodynamic Analysis

Temperature= 298.150 Kelvin Pressure= 1.00000 Atm  
 =====

```
SCF Energy=  -550.723724783 Predicted Change= -6.583170D-07
MP2 Energy=  -551.9333149071   MP2 Cor. Energy= -1.20959012
Zero-point correction (ZPE)=      -552.2567  0.05409
Internal Energy (U)=                -552.2526  0.05819
Enthalpy (H)=                       -552.2517  0.05913
Gibbs Free Energy (G)=                -552.2846  0.02625
-----
```

```
Frequencies --  435.4440          548.3127          598.6793
```

Supporting Information: **4chloro2radicalthiophene.out**


---

 Using Gaussian 03: IA32L-G03RevC.02 12-Jun-2004
 

---

```
# g3b3 scf=maxcyc=1000
#N Geom=AllCheck Guess=Read SCRF=Check B3LYP/6-31G(d) Freq
#N Geom=AllCheck Guess=Read SCRF=Check QCISD(T,E4T)/6-31G(d)
#N Geom=AllCheck Guess=Read SCRF=Check MP4/6-31+G(d)
#N Geom=AllCheck Guess=Read SCRF=Check MP4/6-31G(2df,p)
#N Geom=AllCheck Guess=Read SCRF=Check MP2=Full/GTLarge
```

---

 Pointgroup= C1 Stoichiometry= C4H2ClS(2) C1[X(C4H2ClS)] #Atoms= 8  
 Charge = 0 Multiplicity = 2
 

---

```
SCF Energy= -1009.64917573 Predicted Change= -4.546694D-08
MP2 Energy= -1011.345858003 Correl. Energy= -1.69668227
```

---

```
Optimization completed.      {Found      2      times}
Item  Max Val.  Criteria  Pass?  RMS Val.  Criteria  Pass?
Force  0.00005 || 0.00045 [ YES ]   0.00002 || 0.00030 [ YES ]
Displ  0.00067 || 0.00180 [ YES ]   0.00067 || 0.00180 [ YES ]
```

---

```
Atomic      Coordinates (Angstroms)
Type       X          Y          Z
```

---

```
C   -0.327340  -1.005594  0.000016
C    0.548776   0.041487  0.000001
C   -0.063530   1.346567  0.000006
C   -1.407154   1.191424  0.000009
S   -1.980690  -0.427798  -0.000011
H   -0.108562  -2.064282  0.000023
H    0.484249   2.279943  0.000009
Cl   2.282990  -0.165541  -0.000003
```

---

## Statistical Thermodynamic Analysis

```
Temperature= 298.150 Kelvin Pressure= 1.00000 Atm
```

---

```
SCF Energy= -1009.64917573 Predicted Change= -4.546694D-08
MP2 Energy= -1011.345858003 MP2 Cor. Energy= -1.69668227
Zero-point correction (ZPE)= -1011.8551 0.04473
Internal Energy (U)= -1011.8498 0.04999
Enthalpy (H)= -1011.8489 0.05093
Gibbs Free Energy (G)= -1011.8854 0.01441
```

---

```
Frequencies -- 202.4091      285.1962      360.1925
```

Supporting Information: **5radical23dichlorothiophene.out**

-----  
 Using Gaussian 03: IA32L-G03RevC.02 12-Jun-2004  
 =====

# g3b3

#N Geom=AllCheck Guess=Read SCRF=Check B3LYP/6-31G(d) Freq

#N Geom=AllCheck Guess=Read SCRF=Check QCISD(T,E4T)/6-31G(d)

#N Geom=AllCheck Guess=Read SCRF=Check MP4/6-31+G(d)

#N Geom=AllCheck Guess=Read SCRF=Check MP4/6-31G(2df,p)

#N Geom=AllCheck Guess=Read SCRF=Check MP2=Full/GTLarge  
 -----

Pointgroup= C1 Stoichiometry= C4HCl2S(2) C1[X(C4HCl2S)] #Atoms= 8

Charge = 0 Multiplicity = 2  
 -----

SCF Energy= -1468.57032663 Predicted Change= -6.608230D-08

MP2 Energy= -1470.757248311 Correl. Energy= -2.18692168  
 =====

Optimization completed. {Found 2 times}

| Item  | Max Val. | Criteria | Pass?   | RMS Val. | Criteria | Pass?   |
|-------|----------|----------|---------|----------|----------|---------|
| Force | 0.00007  | 0.00045  | [ YES ] | 0.00002  | 0.00030  | [ YES ] |
| Displ | 0.00042  | 0.00180  | [ YES ] | 0.00042  | 0.00180  | [ YES ] |

-----

| Atomic Type | Coordinates (Angstroms) |   |   |
|-------------|-------------------------|---|---|
|             | X                       | Y | Z |

-----

|    |           |           |           |
|----|-----------|-----------|-----------|
| C  | 1.420973  | -1.759700 | 0.000078  |
| C  | 0.080682  | -1.918906 | 0.000031  |
| C  | -0.553828 | -0.621775 | -0.000049 |
| C  | 0.329342  | 0.425326  | 0.000128  |
| S  | 1.998414  | -0.142347 | -0.000197 |
| H  | -0.464877 | -2.853946 | 0.000072  |
| Cl | -0.023527 | 2.110398  | 0.000219  |
| Cl | -2.280753 | -0.440878 | -0.000104 |

-----

## Statistical Thermodynamic Analysis

Temperature= 298.150 Kelvin Pressure= 1.00000 Atm  
 =====

SCF Energy= -1468.57032663 Predicted Change= -6.608230D-08

MP2 Energy= -1470.757248311 MP2 Cor. Energy= -2.18692168

Zero-point correction (ZPE)= -1471.4518 0.03541

Internal Energy (U)= -1471.4453 0.04191

Enthalpy (H)= -1471.4444 0.04285

Gibbs Free Energy (G)= -1471.4844 0.00278  
 -----

Frequencies -- 155.1115 173.7482 195.9047

**Bromine Radical: B3LYP/6-31g(d)**

Supporting Information: bromineradical.out

-----  
Using Gaussian 03: IA32L-G03RevC.02 12-Jun-2004

=====

# opt freq ub3lyp/6-31g(d) geom=connectivity

#N Geom=AllCheck Guess=Read SCRF=Check GenChk UB3LYP/6-31G(d) Freq

-----  
Pointgroup= OH Stoichiometry= Br(2) OH[O(Br)] #Atoms= 1

Charge = 0 Multiplicity = 2

-----  
SCF Energy= -2571.65691822 Predicted Change= 0.000000D+00

=====

Optimization completed. {Found 2 times}

Item Max Val. Criteria Pass? RMS Val. Criteria Pass?

Force 0.00000 || 0.00045 [ YES ] 0.00000 || 0.00030 [ YES ]

Displ 0.00000 || 0.00180 [ YES ] 0.00000 || 0.00180 [ YES ]

-----  
Atomic Coordinates (Angstroms)

Type X Y Z

-----  
Br 0.000000 0.000000 0.000000-----  
Statistical Thermodynamic Analysis

Temperature= 298.150 Kelvin Pressure= 1.00000 Atm

=====

SCF Energy= -2571.65691822 Predicted Change= 0.000000D+00

Zero-point correction (ZPE)= -2571.6569 0.00000

Internal Energy (U)= -2571.6555 0.00141

Enthalpy (H)= -2571.6545 0.00236

Gibbs Free Energy (G)= -2571.6737 -0.01683

-----

**Chlorine Radical: B3LYP/6-31g(d)**

Supporting Information: chlorineradical\_ub3lyp631gd.out

-----  
Using Gaussian 03: IA32L-G03RevC.02 12-Jun-2004

=====

# opt=(modredundant) freq ub3lyp/6-31g(d) geom=connectivity

#N Geom=AllCheck Guess=Read SCRF=Check GenChk UB3LYP/6-31G(d) Freq

-----  
Pointgroup= OH Stoichiometry= Cl(2) OH[O(Cl)] #Atoms= 1

Charge = 0 Multiplicity = 2

-----  
SCF Energy= -460.136242222 Predicted Change= 0.000000D+00

=====

Optimization completed. {Found 2 times}

Item Max Val. Criteria Pass? RMS Val. Criteria Pass?

Force 0.00000 || 0.00045 [ YES ] 0.00000 || 0.00030 [ YES ]

Displ 0.00000 || 0.00180 [ YES ] 0.00000 || 0.00180 [ YES ]

-----  
Atomic Coordinates (Angstroms)

Type X Y Z

-----  
Cl 0.000000 0.000000 0.000000-----  
Statistical Thermodynamic Analysis

Temperature= 298.150 Kelvin Pressure= 1.00000 Atm

=====

SCF Energy= -460.136242222 Predicted Change= 0.000000D+00

Zero-point correction (ZPE)= -460.1362 0.00000

Internal Energy (U)= -460.1348 0.00141

Enthalpy (H)= -460.1338 0.00236

Gibbs Free Energy (G)= -460.1519 -0.01567

-----

**Fluorine Radical: B3LYP/6-31g(d)**

Supporting Information: fluorineradical.out

-----  
Using Gaussian 03: AM64L-G03RevC.02 12-Jun-2004

=====

# opt freq nosymm ub3lyp/6-31g(d) geom=connectivity scf=maxcycle=5000

#N Geom=AllCheck Guess=Read SCRF=Check GenChk UB3LYP/6-31G(d) Freq

-----

Pointgroup= OH Stoichiometry= F(2) OH[O(F)] #Atoms= 1

Charge = 0 Multiplicity = 2

-----

SCF Energy= -99.7155363805 Predicted Change= 0.000000D+00

=====

Optimization completed. {Found 2 times}

Item Max Val. Criteria Pass? RMS Val. Criteria Pass?

Force 0.00000 || 0.00045 [ YES ] 0.00000 || 0.00030 [ YES ]

Displ 0.00000 || 0.00180 [ YES ] 0.00000 || 0.00180 [ YES ]

-----

Atomic Coordinates (Angstroms)

Type X Y Z

-----

F -1.233766 1.103896 0.000000

-----

Statistical Thermodynamic Analysis

Temperature= 298.150 Kelvin Pressure= 1.00000 Atm

=====

SCF Energy= -99.7155363805 Predicted Change= 0.000000D+00

Zero-point correction (ZPE)= -99.7155 0.00000

Internal Energy (U)= -99.7141 0.00141

Enthalpy (H)= -99.7131 0.00236

Gibbs Free Energy (G)= -99.7303 -0.01481

-----

**Hydrogen Radical: B3LYP/6-31g(d)**

Supporting Information: hydrogenrad.out

-----  
Using Gaussian 03: IA32L-G03RevC.02 12-Jun-2004  
=====# opt=(modredundant) freq ub3lyp/6-31g(d) geom=connectivity  
#N Geom=AllCheck Guess=Read SCRF=Check GenChk UB3LYP/6-31G(d) Freq  
-----Pointgroup= OH Stoichiometry= H(2) OH[O(H)] #Atoms= 1  
Charge = 0 Multiplicity = 2  
-----SCF Energy= -0.500272784191 Predicted Change= 0.000000D+00  
=====Optimization completed. {Found 2 times}  
Item Max Val. Criteria Pass? RMS Val. Criteria Pass?  
Force 0.00000 || 0.00045 [ YES ] 0.00000 || 0.00030 [ YES ]  
Displ 0.00000 || 0.00180 [ YES ] 0.00000 || 0.00180 [ YES ]  
-----Atomic Coordinates (Angstroms)  
Type X Y Z  
-----H 0.000000 0.000000 0.000000  
-----

Statistical Thermodynamic Analysis

Temperature= 298.150 Kelvin Pressure= 1.00000 Atm  
=====SCF Energy= -0.500272784191 Predicted Change= 0.000000D+00  
Zero-point correction (ZPE)= -0.5002 0.00000  
Internal Energy (U)= -0.4988 0.00141  
Enthalpy (H)= -0.4979 0.00236  
Gibbs Free Energy (G)= -0.5109 -0.01065  
-----

**Chlorine Radical: G3B3**

Supporting Information: chlorineradical.out

-----  
Using Gaussian 03: IA32L-G03RevC.02 12-Jun-2004  
=====

# g3b3

#N Geom=AllCheck Guess=Read SCRF=Check B3LYP/6-31G(d) Freq

#N Geom=AllCheck Guess=Read SCRF=Check QCISD(T,E4T)/6-31G(d)

#N Geom=AllCheck Guess=Read SCRF=Check MP4/6-31+G(d)

#N Geom=AllCheck Guess=Read SCRF=Check MP4/6-31G(2df,p)

#N Geom=AllCheck Guess=Read SCRF=Check MP2=Full/GTLarge  
-----

Pointgroup= OH Stoichiometry= Cl(2) OH[O(Cl)] #Atoms= 1

Charge = 0 Multiplicity = 2  
-----

SCF Energy= -459.478996995 Predicted Change= 0.000000D+00

MP2 Energy= -459.9414838608 Correl. Energy= -0.462486865  
=====

Optimization completed. {Found 2 times}

Item Max Val. Criteria Pass? RMS Val. Criteria Pass?

Force 0.00000 || 0.00045 [ YES ] 0.00000 || 0.00030 [ YES ]

Displ 0.00000 || 0.00180 [ YES ] 0.00000 || 0.00180 [ YES ]  
-----

Atomic Coordinates (Angstroms)

Type X Y Z  
-----Cl 0.000000 0.000000 0.000000  
-----

Statistical Thermodynamic Analysis

Temperature= 298.150 Kelvin Pressure= 1.00000 Atm  
=====

SCF Energy= -459.478996995 Predicted Change= 0.000000D+00

MP2 Energy= -459.9414838608 MP2 Cor. Energy= -0.462486865

Zero-point correction (ZPE)= -460.1362 0.00000

Internal Energy (U)= -460.1348 0.00141

Enthalpy (H)= -460.1338 0.00236

Gibbs Free Energy (G)= -460.1519 -0.01567  
-----



**Hydrogen Radical: B3LYP/6-31g(d)**

Supporting Information: hydrogenrad.out

-----  
Using Gaussian 03: IA32L-G03RevC.02 12-Jun-2004  
=====

# g3b3

#N Geom=AllCheck Guess=Read SCRF=Check B3LYP/6-31G(d) Freq

#N Geom=AllCheck Guess=Read SCRF=Check QCISD(T,E4T)/6-31G(d)

#N Geom=AllCheck Guess=Read SCRF=Check MP4/6-31+G(d)

#N Geom=AllCheck Guess=Read SCRF=Check MP4/6-31G(2df,p)

#N Geom=AllCheck Guess=Read SCRF=Check MP2=Full/GTLarge  
-----

Pointgroup= OH Stoichiometry= H(2) OH[O(H)] #Atoms= 1

Charge = 0 Multiplicity = 2  
-----

SCF Energy= -0.499817915630 Predicted Change= 0.000000D+00

MP2 Energy= -0.4998179156304 Correl. Energy= 0  
=====

Optimization completed. {Found 2 times}

Item Max Val. Criteria Pass? RMS Val. Criteria Pass?

Force 0.00000 || 0.00045 [ YES ] 0.00000 || 0.00030 [ YES ]

Displ 0.00000 || 0.00180 [ YES ] 0.00000 || 0.00180 [ YES ]  
-----

Atomic Coordinates (Angstroms)

Type X Y Z  
-----H 0.000000 0.000000 0.000000  
-----

Statistical Thermodynamic Analysis

Temperature= 298.150 Kelvin Pressure= 1.00000 Atm  
=====

SCF Energy= -0.499817915630 Predicted Change= 0.000000D+00

MP2 Energy= -0.4998179156304 MP2 Cor. Energy= 0

Zero-point correction (ZPE)= -0.5002 0.00000

Internal Energy (U)= -0.4988 0.00141

Enthalpy (H)= -0.4979 0.00236

Gibbs Free Energy (G)= -0.5109 -0.01065  
-----
